# Supplementary material for: Systematical comparison reveals distinct brain transcriptomic features in models of depression induced by gut microbiota dysbiosis and chronic stress
Source: Research Square preprint supplement (doi:10.21203/rs.3.rs-4134877/v1), 2024-03-29
Supplement: Supplementary file 1 [file 1cfd54d8cdfa2faf13edb796.xlsx]

## Sheet: Human
Run	Group	Age	alcool	gender	medication	pmi	RIN	Ph
SRR5961892	CTRL	47	NO	male	NO	12	8.3	6.49
SRR5961893	CTRL	41	NO	male	NO	24	6.9	6
SRR5961894	CTRL	31	NO	male	NO	29.5	7.9	6.67
SRR5961895	CTRL	19	-	male	NO	27.75	6.3	6.74
SRR5961915	MDD	63	Yes	male	Yes	50	7.6	6.95
SRR5961916	MDD	25	-	female	Yes	56	5.9	6.55
SRR5961917	MDD	54	NO	female	Yes	28.5	6	6.77
SRR5961918	MDD	48	NO	male	NO	49	6.4	6.56
SRR5961919	MDD	67	Yes	male	NO	56	7.6	6.85
SRR5961920	CTRL	46	NO	male	NO	59	5.6	6.83
SRR5961921	MDD	32	-	female	Yes	41	6.4	6.89
SRR5961922	CTRL	52	-	male	NO	10	5.1	6.11
SRR5961923	MDD	55	NO	female	Yes	2.5	6.3	6.5
SRR5961924	CTRL	72	NO	female	NO	17	5.3	6.1
SRR5961925	MDD	41	-	female	-	12	5.8	6.7
SRR5961926	CTRL	29	-	male	-	4	5.7	6.4
SRR5961927	CTRL	45	NO	female	Yes	44	7.6	6.5
SRR5961928	MDD	48	-	female	-	17.5	6.8	6.5
SRR5961929	CTRL	82	-	female	-	106	6.4	7
SRR5961930	MDD	36	NO	female	Yes	7.5	7.3	6.9
SRR5961931	MDD	52	-	female	-	4.5	5.5	6.5
SRR5961932	CTRL	60	NO	female	NO	38	7.3	6.7
SRR5961933	CTRL	22	-	female	NO	2	6.3	7
SRR5961934	CTRL	68	-	female	-	8.5	6.1	6.21
SRR5961935	MDD	59	-	female	Yes	3	8	6.27
SRR5961936	CTRL	59	-	male	-	23.5	7.7	6.76
SRR5961937	CTRL	51	NO	female	NO	16	6.4	6.71

## Sheet: mouse
Run	Organism	Group	RIN
SRR5956337	Mus musculus	CUMS	9
SRR5956338	Mus musculus	CUMS	8.5
SRR5956339	Mus musculus	CUMS	8.7
SRR5956340	Mus musculus	CUMS	9.1
SRR5956341	Mus musculus	CUMS	9.2
SRR5956342	Mus musculus	CUMS	8.9
SRR5956343	Mus musculus	CUMS	9.1
SRR5956344	Mus musculus	CUMS	8.8
SRR5956345	Mus musculus	CUMS	8.8
SRR5956356	Mus musculus	CTRL	8.9
SRR5956357	Mus musculus	CTRL	8.6
SRR5956358	Mus musculus	CTRL	8.7
SRR5956359	Mus musculus	CTRL	8.7
SRR5956360	Mus musculus	CTRL	8.3
SRR5956361	Mus musculus	CTRL	9.4
SRR5956362	Mus musculus	CTRL	8.8
SRR5956363	Mus musculus	CTRL	10
SRR5956364	Mus musculus	CTRL	8.7
SRR5956365	Mus musculus	CTRL	9.2
