# Supplementary material for: Systematical comparison reveals distinct brain transcriptomic features in models of depression induced by gut microbiota dysbiosis and chronic stress
Source: Research Square preprint supplement (doi:10.21203/rs.3.rs-4134877/v1), 2024-03-29
Supplement: Supplementary file 2 [file 2297d2fb01d4916456813e5a.xlsx]

## Sheet: FMT
geneSet	description	ES	NES	pValue	FDR	size	leadingEdgeNum	leadingEdgeId	userId
GO:0072665	protein localization to vacuole	-0.394102	-2.23493	0	0.0222587	50	28	51100;11133;22878;4734;10369;30849;27092;23677;23230;6653;79158;9475;1191;59284;3312;975;7879;51520;950;9570;3920;8678;8943;26985;4074;23163;8546;8031	ENSG00000003056;ENSG00000005893;ENSG00000065000;ENSG00000069869;ENSG00000075461;ENSG00000075785;ENSG00000097033;ENSG00000105605;ENSG00000108433;ENSG00000109971;ENSG00000110651;ENSG00000111670;ENSG00000118162;ENSG00000120885;ENSG00000125447;ENSG00000126581;ENSG00000130147;ENSG00000132842;ENSG00000133706;ENSG00000134318;ENSG00000137642;ENSG00000138760;ENSG00000153339;ENSG00000166862;ENSG00000185009…
GO:0034976	response to endoplasmic reticulum stress	-0.271214	-2.26126	0	0.0253749	231	100	55033;5371;3068;153222;58515;5296;9451;550;56005;10299;258010;91304;120892;51035;2907;2081;4690;5610;7844;30827;11236;5526;22926;10130;64764;8440;468;10277;3300;26608;91147;2033;30001;51009;26003;488;9695;11160;10134;8398;9919;9217;10987;10113;10955;10399;1200;1191;51060;1938;6449;7184;9131;6734;84447;29761;54499;596;51726;5611;1388;57003;92305;10525;27230;1965;7353;6400;8893;7009;84236;1649;267;…	ENSG00000023318;ENSG00000055332;ENSG00000068971;ENSG00000070010;ENSG00000071051;ENSG00000071537;ENSG00000072849;ENSG00000074842;ENSG00000087274;ENSG00000090520;ENSG00000100393;ENSG00000100519;ENSG00000101294;ENSG00000102580;ENSG00000104969;ENSG00000105647;ENSG00000106080;ENSG00000106638;ENSG00000108433;ENSG00000108588;ENSG00000109133;ENSG00000110344;ENSG00000113163;ENSG00000113811;ENSG00000115307…
GO:0030865	cortical cytoskeleton organization	-0.392824	-2.1461	0	0.0296486	41	20	30846;8976;2035;6242;2037;5048;5341;6093;9475;55012;382;23433;23136;752;3996;85369;3551;7094;811;1739	ENSG00000007168;ENSG00000024422;ENSG00000067900;ENSG00000075711;ENSG00000079819;ENSG00000082397;ENSG00000092020;ENSG00000104365;ENSG00000106299;ENSG00000114993;ENSG00000115956;ENSG00000119729;ENSG00000131899;ENSG00000134318;ENSG00000137076;ENSG00000143093;ENSG00000159023;ENSG00000165527;ENSG00000179218;ENSG00000184922
GO:0035966	response to topologically incorrect protein	-0.279905	-2.15996	0	0.0313847	164	64	22824;2081;4690;8452;5610;30827;5526;3320;10808;22926;10130;64764;8440;468;10013;3300;26608;2033;30001;51009;9695;9217;10987;10113;10399;1200;1191;7184;6734;84447;3329;51726;5611;1388;3312;92305;64224;51768;11080;10525;3301;27230;1965;7353;7009;84236;1649;267;6745;55161;55284;23071;3297;9570;56886;4189;3313;10106;79139;7094;811;118;22872;201595	ENSG00000023318;ENSG00000036257;ENSG00000055332;ENSG00000064115;ENSG00000068971;ENSG00000070010;ENSG00000071051;ENSG00000072849;ENSG00000080824;ENSG00000086061;ENSG00000087274;ENSG00000090520;ENSG00000094631;ENSG00000100393;ENSG00000102580;ENSG00000104343;ENSG00000106638;ENSG00000108433;ENSG00000109133;ENSG00000109971;ENSG00000113013;ENSG00000118217;ENSG00000120694;ENSG00000120742;ENSG00000120885…
GO:0007031	peroxisome organization	-0.328279	-2.04102	0	0.0343229	66	28	51;5828;5190;5830;5264;10005;1891;847;9409;5825;8310;5191;56947;54469;3416;219743;10059;7323;4358;51762;83752;3417;65084;8443;5194;3295;7322;1384	ENSG00000086666;ENSG00000087008;ENSG00000087470;ENSG00000095321;ENSG00000101473;ENSG00000102910;ENSG00000104823;ENSG00000107537;ENSG00000109332;ENSG00000112357;ENSG00000115204;ENSG00000116906;ENSG00000117528;ENSG00000119912;ENSG00000121680;ENSG00000121691;ENSG00000124587;ENSG00000131508;ENSG00000133835;ENSG00000138413;ENSG00000139197;ENSG00000156521;ENSG00000161533;ENSG00000162928;ENSG00000164751…
GO:0032527	protein exit from endoplasmic reticulum	-0.392002	-2.08816	0.00222717	0.0349143	41	19	6653;51009;9695;10134;9919;10113;7184;84447;92305;6836;7353;6400;84236;56681;81502;79139;6396;51465;55666	ENSG00000070010;ENSG00000071537;ENSG00000072849;ENSG00000079332;ENSG00000101294;ENSG00000134109;ENSG00000136986;ENSG00000137642;ENSG00000138073;ENSG00000144468;ENSG00000148248;ENSG00000148396;ENSG00000157020;ENSG00000162298;ENSG00000166598;ENSG00000168936;ENSG00000182446;ENSG00000185825;ENSG00000198833
GO:0071800	podosome assembly	-0.515577	-2.04455	0.002331	0.0373946	16	7	3936;28988;4478;50807;387;9181;6624	ENSG00000067560;ENSG00000075618;ENSG00000116584;ENSG00000136167;ENSG00000136279;ENSG00000147065;ENSG00000153317
GO:0007034	vacuolar transport	-0.285698	-2.06691	0	0.0377285	117	49	65018;30845;23557;4734;10369;30849;27092;388;54664;4864;23230;9482;6653;55737;3916;79158;64601;203228;1191;128866;59284;51510;3312;63894;54602;7879;66008;23484;51520;51479;950;55297;64145;91782;9570;6293;3920;8678;8943;64400;26985;4074;65082;8546;23295;757;8031;54741;55823	ENSG00000003056;ENSG00000005893;ENSG00000013016;ENSG00000065000;ENSG00000069329;ENSG00000069869;ENSG00000075461;ENSG00000075785;ENSG00000086065;ENSG00000101421;ENSG00000102471;ENSG00000102858;ENSG00000104660;ENSG00000105605;ENSG00000106460;ENSG00000108433;ENSG00000109971;ENSG00000111670;ENSG00000115993;ENSG00000120885;ENSG00000123106;ENSG00000126581;ENSG00000131381;ENSG00000132842;ENSG00000133706…
GO:0006984	ER-nucleus signaling pathway	-0.429436	-2.28573	0	0.0387301	39	29	9709;55160;3309;10018;7494;4780;5771;440;55829;51360;3638;9451;4690;22926;8440;468;488;11160;51043;7184;54499;1388;57003;1965;1649;55161;7157;811;22937	ENSG00000012174;ENSG00000044574;ENSG00000051108;ENSG00000070669;ENSG00000071051;ENSG00000074964;ENSG00000100219;ENSG00000108588;ENSG00000109133;ENSG00000114650;ENSG00000116044;ENSG00000118217;ENSG00000128272;ENSG00000131871;ENSG00000134001;ENSG00000141510;ENSG00000143183;ENSG00000147475;ENSG00000153094;ENSG00000158092;ENSG00000160685;ENSG00000166598;ENSG00000172071;ENSG00000174437;ENSG00000175197…
GO:0007033	vacuole organization	-0.275556	-2.09718	0	0.0389527	143	63	55968;51100;120892;22878;8100;2055;84317;165324;65018;84286;58476;23557;11345;81671;84557;57535;23400;302;54664;1201;9821;23192;55737;9637;5287;9896;79158;23256;2629;64601;5868;83871;203228;23130;83452;55014;5861;1200;9776;8396;128866;256471;51510;11152;9474;57533;8408;11337;7879;5538;950;9638;64422;5663;29979;8678;64400;53;65082;200576;440026;79065;55823	ENSG00000023287;ENSG00000032742;ENSG00000034713;ENSG00000057663;ENSG00000062716;ENSG00000069329;ENSG00000075785;ENSG00000078804;ENSG00000080815;ENSG00000086065;ENSG00000088833;ENSG00000092108;ENSG00000097033;ENSG00000101421;ENSG00000101460;ENSG00000106460;ENSG00000109113;ENSG00000110046;ENSG00000111670;ENSG00000112367;ENSG00000115020;ENSG00000116299;ENSG00000126581;ENSG00000127419;ENSG00000131238…
GO:0007229	integrin-mediated signaling pathway	-0.303282	-1.95688	0	0.0453187	78	33	9358;1307;6850;8829;961;10979;7070;9270;65979;2039;9510;967;55679;3693;8452;9564;5341;3688;83605;3675;3679;667;998;8751;5781;25;7791;4185;55920;8754;7094;5747;1495	ENSG00000005884;ENSG00000036257;ENSG00000044115;ENSG00000050820;ENSG00000070831;ENSG00000072163;ENSG00000073670;ENSG00000073712;ENSG00000082781;ENSG00000084636;ENSG00000097007;ENSG00000099250;ENSG00000115956;ENSG00000119185;ENSG00000135404;ENSG00000135424;ENSG00000136280;ENSG00000137076;ENSG00000143537;ENSG00000150093;ENSG00000151914;ENSG00000154096;ENSG00000154734;ENSG00000158856;ENSG00000159840…
GO:0016482	cytosolic transport	-0.258385	-1.95854	0	0.0481742	142	56	8411;10652;6811;30845;8898;90196;5987;9527;79735;9367;23230;26088;7813;29062;9482;160;6653;55737;3916;79585;5868;84910;25930;3799;25963;2060;10772;51560;7109;23011;6836;57533;4478;7879;23041;27131;3798;22836;9559;51479;55638;55297;547;64145;10749;23258;6642;9570;6293;8678;64400;10228;200576;9980;8729;55823	ENSG00000013016;ENSG00000028528;ENSG00000061987;ENSG00000067208;ENSG00000069329;ENSG00000075785;ENSG00000076201;ENSG00000080371;ENSG00000085832;ENSG00000087053;ENSG00000089006;ENSG00000100083;ENSG00000102189;ENSG00000103978;ENSG00000104946;ENSG00000105875;ENSG00000106636;ENSG00000107862;ENSG00000108433;ENSG00000108587;ENSG00000115020;ENSG00000122958;ENSG00000123106;ENSG00000123595;ENSG00000126581…
GO:0043574	peroxisomal transport	-0.33117	-1.96606	0	0.0497225	56	24	51;5828;5190;5830;5264;10005;1891;847;9409;8310;5191;54469;3416;219743;7323;4358;51762;83752;3417;8443;5194;3295;7322;1384	ENSG00000086666;ENSG00000087008;ENSG00000095321;ENSG00000101473;ENSG00000102910;ENSG00000104823;ENSG00000107537;ENSG00000109332;ENSG00000112357;ENSG00000115204;ENSG00000116906;ENSG00000119912;ENSG00000121680;ENSG00000121691;ENSG00000124587;ENSG00000131508;ENSG00000133835;ENSG00000138413;ENSG00000139197;ENSG00000156521;ENSG00000161533;ENSG00000162928;ENSG00000164751;ENSG00000166128
GO:0048193	Golgi vesicle transport	-0.225042	-1.9378	0	0.0497482	313	111	60561;10652;9382;6811;8452;10959;11236;30845;11031;11345;163882;11127;90196;27314;25923;51290;9527;80262;84364;4218;1785;55973;64764;10342;9183;23230;26088;287;54943;160;6653;11014;3916;79585;23256;10134;83871;4644;7405;3064;9919;9217;83452;10113;51164;55014;9522;5861;10399;3831;22870;83696;51693;57120;10434;2060;832;51594;2802;1783;51560;2803;7109;340371;6836;57533;1314;9135;9950;23041;10525;379…	ENSG00000013016;ENSG00000028528;ENSG00000029725;ENSG00000034713;ENSG00000036257;ENSG00000047932;ENSG00000061987;ENSG00000065000;ENSG00000066455;ENSG00000075790;ENSG00000077380;ENSG00000077549;ENSG00000079332;ENSG00000079805;ENSG00000084733;ENSG00000085365;ENSG00000085832;ENSG00000086598;ENSG00000086827;ENSG00000087502;ENSG00000090615;ENSG00000092108;ENSG00000095139;ENSG00000100083;ENSG00000100528…
GO:1903513	endoplasmic reticulum to cytosol transport	-0.418444	-1.97383	0.00436681	0.0501933	27	13	51009;9695;10134;7184;84447;92305;7353;6400;84236;81502;79139;51465;55666	ENSG00000070010;ENSG00000071537;ENSG00000072849;ENSG00000101294;ENSG00000134109;ENSG00000136986;ENSG00000144468;ENSG00000162298;ENSG00000166598;ENSG00000168936;ENSG00000182446;ENSG00000185825;ENSG00000198833
GO:0006907	pinocytosis	-0.496609	-1.97615	0.00218818	0.0539065	17	13	30844;558;257364;9261;857;7376;1785;83871;81;112755;5538;27131;51479	ENSG00000079805;ENSG00000089006;ENSG00000099365;ENSG00000103966;ENSG00000105974;ENSG00000109113;ENSG00000130402;ENSG00000131238;ENSG00000131408;ENSG00000162889;ENSG00000167601;ENSG00000173548;ENSG00000185722
GO:1903311	regulation of mRNA metabolic process	0.277104	2.14185	0	0.0717098	219	102	1859;57690;9698;708;3191;5976;10657;10236;64506;9967;23367;84530;26058;2475;9589;10140;3178;56853;22849;7534;8570;23019;6294;57721;6732;79869;11051;55234;51441;6433;1660;10659;23543;79810;54512;1153;1981;7432;8683;1994;7529;26135;904;3181;10658;3184;60680;9567;10949;340719;79066;9337;6830;55677;79068;23404;3192;6426;23435;29883;58517;1655;7314;8761;5578;6626;25962;7316;54623;23210;23016;23112;111…	ENSG00000003756;ENSG00000005007;ENSG00000006712;ENSG00000048740;ENSG00000049883;ENSG00000054118;ENSG00000061936;ENSG00000066044;ENSG00000070495;ENSG00000075856;ENSG00000075914;ENSG00000077312;ENSG00000078687;ENSG00000088247;ENSG00000090621;ENSG00000090905;ENSG00000096063;ENSG00000099622;ENSG00000100226;ENSG00000100320;ENSG00000100354;ENSG00000101489;ENSG00000103549;ENSG00000104824;ENSG00000107864…
GO:0018196	peptidyl-asparagine modification	-0.412312	-1.84142	0.0195652	0.0963147	22	10	3703;84447;55662;6184;1603;56886;58505;1650;51465;201595	ENSG00000129562;ENSG00000134910;ENSG00000136731;ENSG00000162298;ENSG00000163527;ENSG00000163902;ENSG00000166135;ENSG00000198833;ENSG00000198856;ENSG00000244038
GO:0019058	viral life cycle	-0.222267	-1.79043	0	0.129175	185	56	51193;5987;302;4864;23087;2332;83737;51271;9126;3836;8812;3688;5091;3916;5479;9213;9475;5868;7405;9217;5861;128866;3416;2060;596;51510;5886;51763;3312;7913;9474;998;11059;975;7879;7726;5297;6780;1487;3837;89853;5093;950;6733;91782;137492;5094;1508;10155;9798;27336;5818;55048;51495;6575;51534	ENSG00000009844;ENSG00000057663;ENSG00000070831;ENSG00000074696;ENSG00000075785;ENSG00000078747;ENSG00000085832;ENSG00000086065;ENSG00000090061;ENSG00000101421;ENSG00000102081;ENSG00000102241;ENSG00000104228;ENSG00000108055;ENSG00000108424;ENSG00000109971;ENSG00000110400;ENSG00000110651;ENSG00000114030;ENSG00000119912;ENSG00000121864;ENSG00000123124;ENSG00000124164;ENSG00000124214;ENSG00000124795…
GO:0032616	interleukin-13 production	-0.515035	-1.76041	0.021692	0.134188	11	8	3556;55540;5914;90865;3606;5590;23765;27242	ENSG00000056736;ENSG00000067606;ENSG00000131759;ENSG00000137033;ENSG00000146072;ENSG00000150782;ENSG00000177663;ENSG00000196083
GO:0006457	protein folding	-0.225144	-1.76152	0	0.140363	173	73	64374;120526;134492;10856;3315;3326;134218;567;5903;55664;6904;51645;51234;51035;6903;64215;22824;10845;79087;821;4802;7411;9049;3320;2771;9529;10808;22926;8195;10130;5082;3300;573;2783;23759;30001;5479;2288;5700;79608;1191;6449;9526;7184;3329;51726;5611;3312;957;11080;10728;7265;3301;7266;1676;10575;9403;267;7203;11328;23071;10294;56886;22948;3313;26973;55831;79139;2923;811;6767;9093;9761	ENSG00000004478;ENSG00000023318;ENSG00000066136;ENSG00000069345;ENSG00000080824;ENSG00000086061;ENSG00000090520;ENSG00000096384;ENSG00000100023;ENSG00000100380;ENSG00000100764;ENSG00000102580;ENSG00000103423;ENSG00000104969;ENSG00000106211;ENSG00000106993;ENSG00000107262;ENSG00000109971;ENSG00000110172;ENSG00000110711;ENSG00000110917;ENSG00000110958;ENSG00000113013;ENSG00000113312;ENSG00000114353…
GO:0098760	response to interleukin-7	-0.397475	-1.76378	0.00849257	0.145783	22	8	3329;471;10963;6774;1399;54014;2923;6597	ENSG00000099942;ENSG00000127616;ENSG00000138363;ENSG00000144381;ENSG00000167004;ENSG00000168439;ENSG00000168610;ENSG00000185658
GO:0061351	neural precursor cell proliferation	-0.241454	-1.72126	0.00255754	0.151359	113	49	1524;9839;6608;2263;2889;3642;8624;8326;1522;5455;4763;6604;5108;6095;10763;84678;85458;3400;2009;7472;120892;6240;22809;55679;2771;6259;5048;6660;22933;23654;1499;2260;153241;10818;4673;2047;10890;58155;747;253980;547;3398;6376;387;473;23028;9181;63925;1495	ENSG00000004487;ENSG00000006210;ENSG00000007168;ENSG00000044115;ENSG00000066468;ENSG00000066629;ENSG00000067560;ENSG00000068903;ENSG00000069667;ENSG00000072163;ENSG00000077782;ENSG00000078674;ENSG00000082014;ENSG00000084733;ENSG00000089094;ENSG00000101160;ENSG00000105989;ENSG00000107263;ENSG00000114353;ENSG00000115738;ENSG00000116584;ENSG00000117569;ENSG00000128602;ENSG00000130294;ENSG00000132688…
GO:0008202	steroid metabolic process	-0.217111	-1.72343	0	0.15614	176	79	1392;4597;64801;949;9256;19;3490;6307;79644;6713;37;6256;114881;84649;3991;6342;6720;51360;5562;50814;3930;6095;10682;10891;3638;476;3988;9619;51170;351;2222;9453;79071;10005;9572;59338;2055;4802;51478;31;847;5978;1312;4047;6309;4864;5467;2246;6653;10577;3069;134429;11160;1717;9885;2260;64746;9784;51474;3837;80025;47;114883;26031;5641;114880;51144;10948;158219;1718;114876;7555;3295;4790;2194;2293…	ENSG00000005379;ENSG00000006025;ENSG00000012174;ENSG00000050405;ENSG00000052802;ENSG00000057252;ENSG00000062282;ENSG00000066136;ENSG00000069667;ENSG00000070882;ENSG00000072310;ENSG00000072778;ENSG00000073060;ENSG00000077782;ENSG00000079156;ENSG00000079435;ENSG00000079459;ENSG00000084093;ENSG00000093010;ENSG00000100600;ENSG00000101473;ENSG00000104549;ENSG00000107679;ENSG00000107798;ENSG00000108424…
GO:0061919	process utilizing autophagic mechanism	-0.189809	-1.72738	0	0.159048	413	153	8131;9373;80772;534;254122;51001;10483;6794;5296;79720;9779;29100;55968;51100;26249;258010;120892;10670;23001;26073;22878;9517;23032;23118;8100;139341;10325;84971;2081;57231;165324;664;65018;58476;23557;55669;11345;4734;30849;81671;3320;90427;84557;6885;57535;23400;92140;79735;4218;23677;22933;1201;4864;23230;10013;9821;10254;23192;2033;5049;9842;55737;9637;6093;5287;23256;2629;64601;5868;7405;25…	ENSG00000004142;ENSG00000005893;ENSG00000009844;ENSG00000023287;ENSG00000032742;ENSG00000033627;ENSG00000034713;ENSG00000055208;ENSG00000055483;ENSG00000057663;ENSG00000062716;ENSG00000064601;ENSG00000067900;ENSG00000068903;ENSG00000069329;ENSG00000069509;ENSG00000069869;ENSG00000075785;ENSG00000077254;ENSG00000078804;ENSG00000078902;ENSG00000080815;ENSG00000080824;ENSG00000083750;ENSG00000084073…
GO:0048284	organelle fusion	-0.241665	-1.70548	0.00251889	0.161705	107	41	6892;8411;858;6811;664;84286;23557;55669;6890;6810;302;84895;9527;54471;4218;30968;9482;8417;56947;374986;64601;83871;7405;55014;3799;54927;10059;112755;23355;7879;51762;51479;9570;84749;23176;10228;811;55022;8615;114088;55823	ENSG00000075785;ENSG00000079950;ENSG00000087470;ENSG00000099365;ENSG00000100335;ENSG00000100505;ENSG00000102189;ENSG00000103496;ENSG00000105971;ENSG00000106554;ENSG00000108433;ENSG00000108587;ENSG00000109113;ENSG00000127419;ENSG00000135093;ENSG00000135823;ENSG00000136874;ENSG00000138768;ENSG00000143553;ENSG00000148343;ENSG00000153823;ENSG00000156931;ENSG00000160695;ENSG00000162236;ENSG00000164402…
GO:0038061	NIK/NF-kappaB signaling	-0.260539	-1.68156	0.00502513	0.175794	83	29	389432;114900;149041;9618;351;192669;5610;5970;55075;5971;6885;3606;5531;81;329;10920;8945;3654;9770;7189;23291;5052;51094;387;5494;811;1739;5495;80829	ENSG00000055332;ENSG00000067560;ENSG00000072803;ENSG00000075711;ENSG00000076604;ENSG00000100614;ENSG00000101265;ENSG00000104856;ENSG00000110330;ENSG00000117450;ENSG00000126070;ENSG00000130402;ENSG00000135341;ENSG00000135870;ENSG00000137831;ENSG00000138032;ENSG00000142192;ENSG00000149923;ENSG00000150782;ENSG00000159346;ENSG00000166167;ENSG00000172247;ENSG00000173039;ENSG00000175104;ENSG00000179218…
GO:0007163	establishment or maintenance of cell polarity	-0.214273	-1.68449	0	0.178241	174	55	50855;390;7465;9053;23189;51421;23122;10090;23513;5310;3320;388;889;56288;64398;5048;5754;9183;29780;6093;55333;9475;3064;10399;5590;10486;667;998;4478;22836;10487;2047;382;10890;23433;9267;5058;3996;1399;79109;29899;1398;387;399687;378;1739;5908;9181;6624;81565;4926;4139;5747;8729;1495	ENSG00000001631;ENSG00000007168;ENSG00000008710;ENSG00000044115;ENSG00000067560;ENSG00000067606;ENSG00000067900;ENSG00000070831;ENSG00000072415;ENSG00000075618;ENSG00000075711;ENSG00000080824;ENSG00000084733;ENSG00000086827;ENSG00000099942;ENSG00000102981;ENSG00000107104;ENSG00000107862;ENSG00000108669;ENSG00000111962;ENSG00000112186;ENSG00000112655;ENSG00000114019;ENSG00000115963;ENSG00000116141…
GO:0061614	pri-miRNA transcription by RNA polymerase II	-0.317294	-1.67082	0.0193237	0.18206	37	13	657;5970;7042;4775;5467;4781;6722;6774;7157;9759;6597;6721;3725	ENSG00000068024;ENSG00000072736;ENSG00000092969;ENSG00000107779;ENSG00000112033;ENSG00000112658;ENSG00000127616;ENSG00000141510;ENSG00000147862;ENSG00000168610;ENSG00000173039;ENSG00000177606;ENSG00000198911
GO:0001773	myeloid dendritic cell activation	-0.473095	-1.66093	0.034413	0.185868	11	9	84868;6688;4055;3516;7048;814;5971;7189;5663	ENSG00000066336;ENSG00000080815;ENSG00000104856;ENSG00000111321;ENSG00000135077;ENSG00000152495;ENSG00000163513;ENSG00000168214;ENSG00000175104
GO:0016197	endosomal transport	-0.209747	-1.64414	0.00571429	0.188183	186	70	30846;79720;9779;10938;10043;9912;120892;8411;10652;9201;6811;9907;30845;23513;5987;9527;79735;4218;9367;8301;26088;10254;7813;51271;6653;55737;55745;64601;84910;25930;25963;128866;8766;2060;9897;51429;51560;7109;6836;57533;7879;9784;23484;27131;22836;9559;382;10890;9372;51479;89853;64145;8878;91782;22876;23258;6642;9570;6293;137492;8943;23163;392;8546;10228;200576;55048;757;54741;8729	ENSG00000006740;ENSG00000013016;ENSG00000024422;ENSG00000028528;ENSG00000053770;ENSG00000065000;ENSG00000067208;ENSG00000069329;ENSG00000073921;ENSG00000075785;ENSG00000076201;ENSG00000084733;ENSG00000085832;ENSG00000089006;ENSG00000100083;ENSG00000100284;ENSG00000101421;ENSG00000102189;ENSG00000103769;ENSG00000103978;ENSG00000104660;ENSG00000104946;ENSG00000106636;ENSG00000107862;ENSG00000108433…
GO:0033865	nucleoside bisphosphate metabolic process	-0.235844	-1.65333	0.00260417	0.188576	102	38	2181;51000;2639;201562;84188;84532;8802;2180;6576;9524;79071;10005;31;84320;8694;84836;5163;60481;55902;5538;347734;9061;2182;54928;80025;47;137964;51144;4967;8460;3295;1738;2194;10380;51660;1743;79877;38	ENSG00000012660;ENSG00000060762;ENSG00000068366;ENSG00000075239;ENSG00000091140;ENSG00000099797;ENSG00000100075;ENSG00000101473;ENSG00000104331;ENSG00000105607;ENSG00000105953;ENSG00000114779;ENSG00000119689;ENSG00000123983;ENSG00000124786;ENSG00000125779;ENSG00000131069;ENSG00000131238;ENSG00000131473;ENSG00000133835;ENSG00000138801;ENSG00000149084;ENSG00000151726;ENSG00000152256;ENSG00000154930…
GO:0070741	response to interleukin-6	-0.36459	-1.64623	0.028777	0.19141	24	12	10891;114900;4089;5970;6772;9646;3717;5781;6774;3572;4790;55022	ENSG00000096968;ENSG00000109320;ENSG00000109819;ENSG00000115415;ENSG00000134352;ENSG00000141646;ENSG00000153823;ENSG00000168610;ENSG00000172247;ENSG00000173039;ENSG00000179295;ENSG00000198730
GO:0031579	membrane raft organization	-0.388054	-1.63482	0.0247191	0.193408	18	8	91663;857;858;302;4864;5538;1739;11252	ENSG00000075711;ENSG00000100266;ENSG00000105971;ENSG00000105974;ENSG00000131238;ENSG00000141458;ENSG00000179820;ENSG00000182718
GO:0006605	protein targeting	-0.183489	-1.62093	0.0031746	0.19842	336	114	130617;51125;6136;288;134;9590;51;5828;51100;29927;6726;120892;5190;5830;2039;5264;10005;1891;6208;92609;55486;65018;9049;4734;10369;847;30849;133022;3320;29800;9409;56288;54471;90580;8310;6122;23230;5191;6727;6653;4285;6194;56947;55333;79158;2534;54469;6193;7385;9472;9776;1191;6449;29103;128866;6734;3416;219743;3329;51763;7323;3312;4358;6124;6747;51201;7095;84243;665;11337;7879;66008;55750;6201;…	ENSG00000003056;ENSG00000005893;ENSG00000006530;ENSG00000008952;ENSG00000010810;ENSG00000023041;ENSG00000027001;ENSG00000055483;ENSG00000058262;ENSG00000065000;ENSG00000069869;ENSG00000075785;ENSG00000080824;ENSG00000083845;ENSG00000086666;ENSG00000087008;ENSG00000095321;ENSG00000097033;ENSG00000100316;ENSG00000100335;ENSG00000101421;ENSG00000101473;ENSG00000102910;ENSG00000104219;ENSG00000104765…
GO:0043631	RNA polyadenylation	-0.289226	-1.62252	0.0233645	0.202214	44	21	351;1479;53981;79882;9646;56254;11052;64895;8189;6829;10914;55339;2926;29894;22916;10768;167153;4686;29101;3297;1478	ENSG00000071894;ENSG00000090060;ENSG00000100722;ENSG00000101811;ENSG00000111605;ENSG00000114503;ENSG00000115421;ENSG00000125755;ENSG00000132463;ENSG00000136709;ENSG00000136937;ENSG00000142192;ENSG00000155827;ENSG00000160075;ENSG00000164329;ENSG00000165934;ENSG00000168710;ENSG00000176102;ENSG00000185122;ENSG00000196235;ENSG00000198730
GO:0010498	proteasomal protein catabolic process	-0.174246	-1.59998	0	0.202862	395	119	8452;23429;165324;7844;5710;65018;11236;6599;5688;5692;2729;11345;4734;5310;9529;5701;23510;83892;22933;80344;10524;2332;10277;3300;83737;91147;7126;409;9575;144165;26046;5686;55743;51009;57092;8451;9695;11160;10134;2629;54467;5700;10399;387921;1191;23072;6449;11124;5707;7184;5714;84447;29761;51185;246184;29882;26234;5886;5713;7323;57003;200933;92305;329;80011;11059;79654;10213;64777;7329;57542;7…	ENSG00000001084;ENSG00000001629;ENSG00000002746;ENSG00000005812;ENSG00000008710;ENSG00000024048;ENSG00000034713;ENSG00000036257;ENSG00000063978;ENSG00000068903;ENSG00000069869;ENSG00000070010;ENSG00000071537;ENSG00000072609;ENSG00000072803;ENSG00000072849;ENSG00000078304;ENSG00000078747;ENSG00000080815;ENSG00000081154;ENSG00000087448;ENSG00000099341;ENSG00000100505;ENSG00000100519;ENSG00000100567…
GO:0006898	receptor-mediated endocytosis	-0.198887	-1.60157	0	0.205846	204	58	858;967;821;11031;4734;8898;10369;23513;27092;1173;3320;10808;302;29967;1785;1201;8301;2332;23208;160;6653;409;3688;5648;5868;1191;28988;7184;59284;2060;3959;51429;5298;54874;23011;22848;975;3190;9784;5538;5879;10525;10487;9026;382;4289;950;57720;51435;5663;23285;22876;6642;4074;811;200576;6311;23149	ENSG00000003056;ENSG00000028528;ENSG00000069869;ENSG00000073921;ENSG00000075461;ENSG00000079805;ENSG00000080371;ENSG00000080815;ENSG00000080824;ENSG00000085832;ENSG00000087053;ENSG00000102081;ENSG00000105605;ENSG00000105971;ENSG00000108679;ENSG00000110651;ENSG00000115020;ENSG00000115234;ENSG00000115977;ENSG00000120694;ENSG00000120885;ENSG00000127022;ENSG00000127241;ENSG00000128585;ENSG00000130340…
GO:0009895	negative regulation of catabolic process	-0.191926	-1.60362	0	0.20863	228	77	134;79048;5073;258010;120892;10670;26073;5140;51035;23118;23429;5970;65018;6599;11345;8898;8531;90427;9529;23400;302;22933;4864;90806;9860;2332;51684;1736;55737;9637;51009;6093;4194;8241;23256;2534;257397;6449;10605;128866;29761;4170;596;51594;8604;80011;340371;57533;1432;6201;51520;6774;167153;7249;1676;10492;5290;9638;1982;23450;5663;9759;10135;7874;25819;84749;8678;5774;51377;57602;11011;9711;…	ENSG00000004142;ENSG00000010810;ENSG00000034713;ENSG00000055208;ENSG00000055483;ENSG00000060138;ENSG00000064601;ENSG00000067900;ENSG00000068024;ENSG00000068903;ENSG00000069329;ENSG00000070159;ENSG00000072849;ENSG00000080815;ENSG00000087053;ENSG00000092108;ENSG00000101421;ENSG00000102081;ENSG00000103197;ENSG00000104081;ENSG00000104969;ENSG00000105835;ENSG00000107882;ENSG00000110321;ENSG00000112062…
GO:0070671	response to interleukin-12	-0.309912	-1.59031	0.0240964	0.210111	34	15	7297;3185;9049;302;6888;6627;3936;3717;998;4478;5306;5062;3313;5908;5898	ENSG00000006451;ENSG00000070831;ENSG00000096968;ENSG00000105397;ENSG00000110711;ENSG00000113013;ENSG00000127314;ENSG00000131876;ENSG00000136167;ENSG00000147065;ENSG00000169813;ENSG00000174238;ENSG00000177156;ENSG00000180370;ENSG00000182718
GO:0002269	leukocyte activation involved in inflammatory response	-0.38456	-1.58535	0.049217	0.211924	18	8	90865;120892;351;1191;4137;10135;6376;3725	ENSG00000006210;ENSG00000105835;ENSG00000120885;ENSG00000137033;ENSG00000142192;ENSG00000177606;ENSG00000186868;ENSG00000188906
GO:0009299	mRNA transcription	-0.388556	-1.60415	0.0388128	0.213535	19	9	468;5467;10114;6722;6774;1649;405;7157;3297	ENSG00000110422;ENSG00000112033;ENSG00000112658;ENSG00000128272;ENSG00000141510;ENSG00000143437;ENSG00000168610;ENSG00000175197;ENSG00000185122
GO:0043620	regulation of DNA-templated transcription in response to stress	-0.257811	-1.57844	0.0245098	0.215687	62	23	571;3298;4690;54617;5970;4734;5598;22926;8440;22933;468;2033;8453;1388;7009;1649;405;7157;55662;3297;10985;1387;3725	ENSG00000005339;ENSG00000025156;ENSG00000068903;ENSG00000069869;ENSG00000071051;ENSG00000089154;ENSG00000100393;ENSG00000108094;ENSG00000118217;ENSG00000128272;ENSG00000128908;ENSG00000139644;ENSG00000141510;ENSG00000143437;ENSG00000156273;ENSG00000158092;ENSG00000166135;ENSG00000166484;ENSG00000173039;ENSG00000175197;ENSG00000177606;ENSG00000185122;ENSG00000213676
GO:0051701	interaction with host	-0.210589	-1.5575	0.0131234	0.241698	133	49	55223;5371;81559;9972;79720;3643;8563;10670;7037;10318;11334;858;3693;5610;1500;4734;23513;51193;5987;4864;23087;83737;9126;3836;8812;3688;5091;3916;9213;7405;9217;1499;23265;128866;3416;2060;11059;975;7879;7726;3837;7919;950;2519;1508;10155;9798;5818;6575	ENSG00000001036;ENSG00000055332;ENSG00000069869;ENSG00000072274;ENSG00000075785;ENSG00000078747;ENSG00000082781;ENSG00000085832;ENSG00000090061;ENSG00000100296;ENSG00000101421;ENSG00000104228;ENSG00000105971;ENSG00000108055;ENSG00000108424;ENSG00000110400;ENSG00000110651;ENSG00000114030;ENSG00000114383;ENSG00000116525;ENSG00000119912;ENSG00000121864;ENSG00000123124;ENSG00000124164;ENSG00000124789…
GO:0032634	interleukin-5 production	-0.472878	-1.55106	0.0578512	0.246798	10	7	3556;55540;5914;90865;5590;23765;27242	ENSG00000056736;ENSG00000067606;ENSG00000131759;ENSG00000137033;ENSG00000146072;ENSG00000177663;ENSG00000196083

## Sheet: CSDS
geneSet	description	ES	NES	pValue	FDR	size	leadingEdgeNum	leadingEdgeId	userId
GO:0006414	translational elongation	-0.295998	-2.28139	0	0.00765161	122	67	90480;64981;54676;219927;6183;78988;51263;64928;64968;26589;64979;28973;128308;79048;3396;79590;9728;28977;51021;63875;92259;60678;10600;51069;60488;64951;54460;54998;23107;1933;65008;6182;7284;51258;65005;1936;84545;55168;57129;64975;1801;10767;9147;54148;10399;29088;51642;51081;16;54534;51650;285381;28998;1917;51253;51091;1938;55173;55052;132864;9801;9567;740;51116;64969;124995;118672	ENSG00000048544;ENSG00000055950;ENSG00000061794;ENSG00000062582;ENSG00000090263;ENSG00000090861;ENSG00000096080;ENSG00000100226;ENSG00000101210;ENSG00000104529;ENSG00000108963;ENSG00000109618;ENSG00000111639;ENSG00000112339;ENSG00000112651;ENSG00000113048;ENSG00000114942;ENSG00000115364;ENSG00000116221;ENSG00000122140;ENSG00000125445;ENSG00000128626;ENSG00000130312;ENSG00000132394;ENSG00000134056…
GO:0010257	NADH dehydrogenase complex assembly	-0.366023	-2.3101	0	0.0101657	61	34	374291;4707;4694;90871;4717;4726;4696;617;4729;4698;4715;4725;4716;4724;4702;4700;51079;29078;4536;4712;79133;4710;4728;51103;4714;91942;4722;4709;4538;4704;55101;4535;4720;55471	ENSG00000003509;ENSG00000065518;ENSG00000074582;ENSG00000101247;ENSG00000105341;ENSG00000109390;ENSG00000110717;ENSG00000115286;ENSG00000119013;ENSG00000119421;ENSG00000123545;ENSG00000125356;ENSG00000128609;ENSG00000137038;ENSG00000137806;ENSG00000139180;ENSG00000140990;ENSG00000145494;ENSG00000147684;ENSG00000158864;ENSG00000164182;ENSG00000164258;ENSG00000165264;ENSG00000166136;ENSG00000168653…
GO:0048193	Golgi vesicle transport	0.275042	2.39115	0	0.0125119	313	141	84516;375;1778;81876;90411;30845;8774;10671;64689;10652;1780;7415;8674;22820;3482;83696;6836;8615;60684;150684;57511;23062;51143;582;113419;23499;2890;57020;23259;10121;287;6844;10342;9980;10466;10483;64225;9527;23041;9265;1781;9217;56681;6709;6712;372;3796;374868;373;400;222068;22818;11014;288;55291;6711;1453;1639;23233;122553;11236;10945;2802;3798;5584;10079;9950;128637;54943;10959;60412;5861;2…	ENSG00000008256;ENSG00000013016;ENSG00000021762;ENSG00000029725;ENSG00000034713;ENSG00000036257;ENSG00000054793;ENSG00000061987;ENSG00000066455;ENSG00000068796;ENSG00000073969;ENSG00000075790;ENSG00000075945;ENSG00000077380;ENSG00000079332;ENSG00000083097;ENSG00000085365;ENSG00000085788;ENSG00000086598;ENSG00000086827;ENSG00000090615;ENSG00000090989;ENSG00000092108;ENSG00000092531;ENSG00000095139…
GO:0033108	mitochondrial respiratory chain complex assembly	-0.336582	-2.32932	0	0.0150846	89	46	374291;84987;84300;4707;4694;90871;4717;4726;4696;29796;617;4729;4698;4715;100131801;4725;4716;4724;4702;6341;4700;51079;29078;54949;135154;6834;4536;4712;79133;4710;4728;28958;51103;4714;91942;285521;4722;4709;4538;55245;790955;4704;55101;4535;4720;55471	ENSG00000003509;ENSG00000065518;ENSG00000074582;ENSG00000101019;ENSG00000101247;ENSG00000105341;ENSG00000109390;ENSG00000110717;ENSG00000115286;ENSG00000119013;ENSG00000119421;ENSG00000123545;ENSG00000125356;ENSG00000128609;ENSG00000133028;ENSG00000137038;ENSG00000137288;ENSG00000137806;ENSG00000139180;ENSG00000140990;ENSG00000145494;ENSG00000147684;ENSG00000148290;ENSG00000154079;ENSG00000158864…
GO:1902600	proton transmembrane transport	-0.291701	-2.13945	0	0.0200035	115	54	374291;527;11315;1337;10105;1184;11182;513;26503;121260;6548;10476;522;1345;84277;9550;478;9551;1528;488;1349;8992;27109;539;1351;529;1350;1340;6834;113235;4697;9114;30968;534;81;5250;9377;533;55002;9296;517;1537;535;6553;4891;9481;4538;515;51382;476;4519;285195;4512;23545	ENSG00000033627;ENSG00000075415;ENSG00000076351;ENSG00000090020;ENSG00000099624;ENSG00000100554;ENSG00000105409;ENSG00000108179;ENSG00000110911;ENSG00000111775;ENSG00000113732;ENSG00000115286;ENSG00000116288;ENSG00000116459;ENSG00000117410;ENSG00000119899;ENSG00000125375;ENSG00000126267;ENSG00000127184;ENSG00000128524;ENSG00000130402;ENSG00000131100;ENSG00000131174;ENSG00000135390;ENSG00000135740…
GO:0031529	ruffle organization	0.391072	2.16934	0	0.0433746	46	22	29887;2475;55920;7168;28988;23191;8394;5341;51763;5217;81565;5962;25940;59338;23603;9530;92154;54849;1436;9842;23647;5879	ENSG00000070087;ENSG00000086300;ENSG00000107679;ENSG00000110880;ENSG00000115956;ENSG00000119812;ENSG00000132254;ENSG00000132376;ENSG00000132613;ENSG00000136238;ENSG00000136279;ENSG00000137710;ENSG00000140416;ENSG00000140995;ENSG00000143398;ENSG00000156735;ENSG00000166579;ENSG00000179051;ENSG00000182578;ENSG00000198793;ENSG00000225190;ENSG00000273749
GO:1902115	regulation of organelle assembly	0.274983	2.21538	0	0.0456684	184	80	1778;6386;81876;23637;8396;3192;57472;8408;203228;23061;5119;125058;8678;56890;9474;7175;85459;22930;10769;585;115704;26054;10274;7419;7251;4848;153241;5962;128637;550643;25782;55823;3064;387;8131;2909;26045;8027;55704;1540;22873;9525;64786;25771;4916;54662;27243;8243;29978;90678;57465;23102;79142;5562;25978;23256;4089;4478;8897;51112;7813;9712;5601;8100;9637;202018;128866;23019;23224;5899;200576…	ENSG00000011454;ENSG00000032742;ENSG00000040633;ENSG00000047410;ENSG00000050748;ENSG00000054611;ENSG00000054654;ENSG00000057663;ENSG00000067208;ENSG00000067560;ENSG00000072501;ENSG00000074319;ENSG00000078668;ENSG00000083799;ENSG00000083937;ENSG00000092108;ENSG00000100330;ENSG00000101421;ENSG00000101972;ENSG00000103148;ENSG00000107021;ENSG00000108055;ENSG00000111554;ENSG00000111596;ENSG00000112701…
GO:0007051	spindle organization	0.282421	2.07409	0	0.0590561	131	54	5524;1778;5901;7415;10579;6867;3192;5116;5119;54617;7175;9793;2009;3796;10769;22919;27229;1453;1639;3837;26054;10274;10426;153241;5518;546;23122;9897;387;10636;1107;8480;10844;6905;22924;9525;440145;8766;9611;27243;8243;4204;25978;203068;128866;1213;2770;9126;49856;8841;10735;126731;80254;8658	ENSG00000047410;ENSG00000066629;ENSG00000067560;ENSG00000068796;ENSG00000072501;ENSG00000083937;ENSG00000084764;ENSG00000085224;ENSG00000101146;ENSG00000101367;ENSG00000101421;ENSG00000101972;ENSG00000103769;ENSG00000105568;ENSG00000108055;ENSG00000108424;ENSG00000112701;ENSG00000116213;ENSG00000118007;ENSG00000119383;ENSG00000119541;ENSG00000126216;ENSG00000127955;ENSG00000128908;ENSG00000130640…
GO:0007033	vacuole organization	0.280373	2.09583	0	0.063185	143	62	375;81876;26100;27072;9927;11337;53;8396;7879;23710;8408;203228;84067;8720;8678;147007;9474;51361;5289;23673;1200;22930;5538;9776;79158;134829;5861;25782;55823;84376;55054;8131;84317;55858;64601;2548;2629;11345;55737;29978;9896;90678;79142;23256;51552;8897;65082;11151;56270;84286;54664;55102;8100;3074;9637;128866;29979;5899;200576;51715;84938;64400	ENSG00000006715;ENSG00000032742;ENSG00000034713;ENSG00000040633;ENSG00000049860;ENSG00000051009;ENSG00000057663;ENSG00000066739;ENSG00000069329;ENSG00000075785;ENSG00000078142;ENSG00000085978;ENSG00000092108;ENSG00000100330;ENSG00000101421;ENSG00000102879;ENSG00000103148;ENSG00000106460;ENSG00000111670;ENSG00000112210;ENSG00000112367;ENSG00000115020;ENSG00000115839;ENSG00000116688;ENSG00000117758…
GO:0019216	regulation of lipid metabolic process	0.211987	1.83334	0	0.0868534	290	94	375;5901;7067;84649;5660;2185;7296;3992;55512;2222;6309;2475;10654;57223;5565;8439;23038;11160;80025;3417;6713;8720;9975;8776;80205;2171;3156;5163;4598;6777;23054;585;6721;207;3837;30849;2321;6667;9453;2194;64919;3398;3157;134;1595;51;94103;5934;2053;153090;4199;6256;9306;124997;9110;348;23411;5581;25942;2180;31;1389;221395;3692;9619;9611;8800;2261;8503;29062;34;1385;22937;1268;5562;2246;7010;864…	ENSG00000001630;ENSG00000035681;ENSG00000062282;ENSG00000063601;ENSG00000065833;ENSG00000068078;ENSG00000069122;ENSG00000071889;ENSG00000079459;ENSG00000084093;ENSG00000084676;ENSG00000096717;ENSG00000100330;ENSG00000102755;ENSG00000103056;ENSG00000103479;ENSG00000104549;ENSG00000105875;ENSG00000108389;ENSG00000108424;ENSG00000109929;ENSG00000110148;ENSG00000110921;ENSG00000111269;ENSG00000112972…
GO:0070972	protein localization to endoplasmic reticulum	0.266453	1.85724	0.00166389	0.0870828	105	55	6122;6210;4736;23471;6191;6138;9045;6124;287;6146;6129;6730;22930;11014;6128;6731;10945;7095;6747;6726;6224;25782;9919;55973;6189;8729;6262;23480;6727;6230;337867;6227;6157;6207;28972;202018;128866;6193;11079;6154;6132;133022;10890;65992;6187;6194;6168;6164;6161;25873;6201;6156;6231;6234;3638	ENSG00000008952;ENSG00000008988;ENSG00000067167;ENSG00000075790;ENSG00000083845;ENSG00000084733;ENSG00000089009;ENSG00000100316;ENSG00000101421;ENSG00000105438;ENSG00000107862;ENSG00000109475;ENSG00000110700;ENSG00000114850;ENSG00000114902;ENSG00000115839;ENSG00000116251;ENSG00000118181;ENSG00000118873;ENSG00000130255;ENSG00000132432;ENSG00000134419;ENSG00000134882;ENSG00000136240;ENSG00000137154…
GO:0030705	cytoskeleton-dependent intracellular transport	0.244216	1.86983	0	0.0877918	159	79	1778;55638;1780;22820;7014;351;10239;10376;2319;3192;7846;1176;667;57539;10128;28981;51361;998;4131;1639;81565;7345;547;3842;3798;282991;5861;55288;8936;84376;57560;3064;11020;56912;4135;11127;8976;55704;5813;51098;55112;4137;3916;4130;79659;3091;8120;79809;5870;23095;4651;26985;55081;26958;203068;8100;117178;23224;22920;8636;199953;1740;5048;79989;57728;3799;4133;4976;254263;63915;54874;51668;89…	ENSG00000007168;ENSG00000032742;ENSG00000054523;ENSG00000054654;ENSG00000068885;ENSG00000070831;ENSG00000075945;ENSG00000078018;ENSG00000080371;ENSG00000081870;ENSG00000083312;ENSG00000100360;ENSG00000100644;ENSG00000101052;ENSG00000102081;ENSG00000103723;ENSG00000105948;ENSG00000106299;ENSG00000107282;ENSG00000112290;ENSG00000114446;ENSG00000115355;ENSG00000117155;ENSG00000118096;ENSG00000118965…
GO:0070849	response to epidermal growth factor	0.350922	1.87791	0.00733945	0.0878776	40	19	4691;8882;8678;7175;51763;6777;207;5781;3658;153090;5595;56940;8826;9530;678;4176;867;5594;5782	ENSG00000047410;ENSG00000100030;ENSG00000102882;ENSG00000109917;ENSG00000110395;ENSG00000112679;ENSG00000115053;ENSG00000126581;ENSG00000127947;ENSG00000132376;ENSG00000136381;ENSG00000136848;ENSG00000140575;ENSG00000142208;ENSG00000152518;ENSG00000156735;ENSG00000166508;ENSG00000173757;ENSG00000179295
GO:0051648	vesicle localization	0.217289	1.84069	0	0.0888344	272	128	23413;375;1778;81876;90411;55638;64689;10652;1499;1780;9751;83930;83696;8615;10239;815;2890;1176;1137;8499;9900;6860;6854;23621;6844;10342;10483;9527;10059;5908;56681;63908;112755;22930;5217;585;55291;1453;6812;81565;10814;8517;122553;6855;547;84961;3798;80331;6857;128637;10959;60412;282991;5861;55717;9919;7109;3064;23122;149111;1488;9699;8729;11127;7476;8976;157769;8766;1000;8773;23208;10484;801…	ENSG00000007168;ENSG00000010270;ENSG00000036054;ENSG00000036257;ENSG00000054523;ENSG00000067715;ENSG00000068400;ENSG00000070087;ENSG00000070540;ENSG00000070808;ENSG00000073969;ENSG00000075945;ENSG00000078018;ENSG00000079332;ENSG00000081803;ENSG00000082701;ENSG00000086598;ENSG00000087470;ENSG00000089041;ENSG00000092108;ENSG00000092531;ENSG00000099365;ENSG00000100505;ENSG00000100934;ENSG00000101152…
GO:0034502	protein localization to chromosome	0.308076	1.86087	0.0034662	0.0891637	63	38	54386;10575;7014;6950;10694;55920;22948;84250;3550;6117;54552;29072;10576;546;908;91782;5885;9555;51112;23383;9183;25836;23063;283489;80351;8658;2146;254394;79003;6118;26277;55506;545;55719;10498;1736;55135;55869	ENSG00000062650;ENSG00000085224;ENSG00000086827;ENSG00000092330;ENSG00000099284;ENSG00000106462;ENSG00000107854;ENSG00000111877;ENSG00000113141;ENSG00000113648;ENSG00000115484;ENSG00000117748;ENSG00000119906;ENSG00000120438;ENSG00000129933;ENSG00000130119;ENSG00000130826;ENSG00000132383;ENSG00000132604;ENSG00000133302;ENSG00000141499;ENSG00000142453;ENSG00000146731;ENSG00000147099;ENSG00000147457…
GO:0016458	gene silencing	0.24186	1.82398	0.00164204	0.0892348	155	55	1655;22916;5901;54487;9125;9643;26523;5436;57472;5119;5431;9337;10526;27327;27044;103;1786;23133;10933;6839;4848;1994;9698;8087;23347;23411;57708;23304;25942;23405;23264;29883;3692;54107;9611;57510;192669;192670;1660;9869;5511;79670;4204;3181;23112;26058;55051;9555;5253;10943;23019;6774;4086;5604;23318	ENSG00000005302;ENSG00000024048;ENSG00000047315;ENSG00000066044;ENSG00000083223;ENSG00000090905;ENSG00000092847;ENSG00000096717;ENSG00000100354;ENSG00000100403;ENSG00000100697;ENSG00000101596;ENSG00000101945;ENSG00000108654;ENSG00000111596;ENSG00000113300;ENSG00000113648;ENSG00000114416;ENSG00000114503;ENSG00000117751;ENSG00000119720;ENSG00000122566;ENSG00000123562;ENSG00000124571;ENSG00000125107…
GO:0018205	peptidyl-lysine modification	0.214763	1.84644	0	0.0894898	297	119	7329;80335;64769;322;55818;6612;23326;1499;22823;58508;2145;55140;9643;64324;55683;10363;22976;57337;54552;55274;9474;2653;9759;10902;51111;5929;29072;7341;57634;8473;1786;10933;6018;8554;4674;57325;3054;26054;11137;6839;9063;59343;9070;6871;284058;546;408;51616;64754;55209;23411;23168;5595;25942;79091;151050;80314;23081;51773;9252;54107;26036;10208;115426;79960;26168;29843;55170;9869;4204;5562;2…	ENSG00000004779;ENSG00000005302;ENSG00000008083;ENSG00000025293;ENSG00000032219;ENSG00000033800;ENSG00000043143;ENSG00000048649;ENSG00000054267;ENSG00000055609;ENSG00000057663;ENSG00000066135;ENSG00000067365;ENSG00000068024;ENSG00000077684;ENSG00000078043;ENSG00000078902;ENSG00000079387;ENSG00000083168;ENSG00000084676;ENSG00000085224;ENSG00000095059;ENSG00000096070;ENSG00000096717;ENSG00000099956…
GO:0098876	vesicle-mediated transport to the plasma membrane	0.278956	1.83462	0.0018315	0.089868	84	41	375;8674;9559;150684;23062;582;23499;57020;23339;6844;112755;373;288;6711;23233;60412;9919;55763;81609;2803;378;27065;4218;8766;90196;10564;55737;56850;114879;55770;23426;80262;9135;377;54536;4905;1445;84079;6809;10890;57554	ENSG00000021762;ENSG00000029725;ENSG00000033122;ENSG00000068400;ENSG00000069329;ENSG00000073969;ENSG00000084733;ENSG00000090989;ENSG00000099365;ENSG00000103365;ENSG00000103544;ENSG00000103653;ENSG00000103769;ENSG00000105186;ENSG00000112685;ENSG00000113595;ENSG00000115306;ENSG00000117533;ENSG00000122958;ENSG00000124198;ENSG00000125149;ENSG00000127603;ENSG00000131558;ENSG00000134287;ENSG00000138190…
GO:0071826	ribonucleoprotein complex subunit organization	0.233337	1.88257	0	0.0900074	214	85	3646;6122;56853;1778;10421;51386;6430;11051;7415;51747;10480;11052;58155;26523;80153;27316;57472;135295;203228;55015;22907;83939;10946;9169;10659;1659;8559;103;23451;6128;1983;27339;25980;1656;4848;6426;10146;550643;1965;11168;8665;3326;10419;6733;9416;55692;25929;23020;55239;7458;92399;23405;24148;708;9908;23212;26747;29883;10181;3692;51388;4137;192669;10291;26065;192670;1660;5562;65003;60677;29…	ENSG00000003756;ENSG00000007392;ENSG00000048740;ENSG00000067596;ENSG00000082516;ENSG00000083635;ENSG00000083845;ENSG00000087263;ENSG00000089009;ENSG00000092847;ENSG00000096384;ENSG00000099622;ENSG00000099995;ENSG00000100129;ENSG00000100316;ENSG00000100462;ENSG00000100650;ENSG00000100664;ENSG00000100697;ENSG00000101161;ENSG00000101489;ENSG00000104408;ENSG00000105373;ENSG00000106682;ENSG00000107290…
GO:0140112	extracellular vesicle biogenesis	0.432802	1.80702	0.0118812	0.0905325	20	9	6386;55512;10987;7879;7251;8027;9525;8766;27243	ENSG00000074319;ENSG00000075785;ENSG00000103056;ENSG00000103769;ENSG00000119541;ENSG00000121022;ENSG00000130724;ENSG00000136738;ENSG00000137575
GO:0045927	positive regulation of growth	0.227471	1.80974	0	0.0921246	190	57	6386;2664;5007;2185;29882;2844;55031;9373;57611;23499;22902;2475;6198;8882;23191;6868;6860;54617;50618;998;5607;57521;6777;9647;84861;585;207;4131;81565;9037;102;6857;22954;51616;387;4851;2803;6197;9699;3643;6722;657;4916;4137;8766;23404;10038;27230;1385;10507;9798;6832;5393;84678;7048;22850;1982	ENSG00000011454;ENSG00000018189;ENSG00000067560;ENSG00000067715;ENSG00000070831;ENSG00000089094;ENSG00000099910;ENSG00000100034;ENSG00000101544;ENSG00000103769;ENSG00000107779;ENSG00000108443;ENSG00000109917;ENSG00000110048;ENSG00000110321;ENSG00000112658;ENSG00000112902;ENSG00000118260;ENSG00000119401;ENSG00000120742;ENSG00000120899;ENSG00000123737;ENSG00000127603;ENSG00000128908;ENSG00000129484…
GO:0006401	RNA catabolic process	0.222033	1.88696	0	0.0922543	275	94	11157;3646;6122;1655;22916;6210;79068;4736;7529;7534;3184;23049;6191;6138;9125;6050;26523;80153;6741;90806;2475;5436;3192;9887;57472;9045;6124;8882;253943;6146;9337;10128;23367;27327;27044;23708;6129;8559;23293;6128;207;3842;1656;8021;4848;23381;5518;550643;7812;6224;1994;9698;8087;79882;5520;6189;9652;54464;26135;10236;51441;1869;29883;23404;22803;192669;6230;192670;26019;1660;5511;79670;55095;4…	ENSG00000008988;ENSG00000009307;ENSG00000023191;ENSG00000066044;ENSG00000070366;ENSG00000080802;ENSG00000083223;ENSG00000083312;ENSG00000083845;ENSG00000088930;ENSG00000089009;ENSG00000090905;ENSG00000092847;ENSG00000099622;ENSG00000100316;ENSG00000100354;ENSG00000100722;ENSG00000101412;ENSG00000104408;ENSG00000105568;ENSG00000108654;ENSG00000109917;ENSG00000110367;ENSG00000110700;ENSG00000111596…
GO:0010498	proteasomal protein catabolic process	0.201212	1.81129	0	0.0944648	395	136	7329;7874;5707;6386;23190;7415;146330;29882;25852;64682;51667;369;150684;9373;10213;5886;5695;4983;23376;11160;9354;5687;80196;25898;119504;5682;7353;267;5713;10425;6388;9817;23198;7341;5708;10193;5887;79791;91445;8473;54442;80267;57162;329;5686;84861;10769;8554;54788;207;1453;8078;7345;57805;27339;11236;8924;84961;5689;153090;26224;23197;80011;197131;9306;5516;64844;408;23392;5720;3326;8451;1110…	ENSG00000001629;ENSG00000004897;ENSG00000005812;ENSG00000008018;ENSG00000011275;ENSG00000013374;ENSG00000013561;ENSG00000014123;ENSG00000024048;ENSG00000033800;ENSG00000034713;ENSG00000036257;ENSG00000050748;ENSG00000068878;ENSG00000069869;ENSG00000070010;ENSG00000071537;ENSG00000077721;ENSG00000078061;ENSG00000079387;ENSG00000079482;ENSG00000079999;ENSG00000089053;ENSG00000090316;ENSG00000092010…
GO:0099003	vesicle-mediated transport in synapse	0.240598	1.91047	0	0.0947776	185	67	23413;375;273;1499;9751;8674;57030;10239;815;71;4983;6456;114781;1176;1137;8499;64854;9900;6860;23621;6844;10059;5908;63908;112755;22930;5217;6812;10814;163;6855;84961;6453;3798;80331;6857;282991;2580;1488;9699;1948;27065;115548;7476;5532;8411;4218;8766;8773;23208;50632;801;9829;55737;1268;26059;673;143425;84162;821;8120;23426;6861;8867;26985;5582;93664	ENSG00000006125;ENSG00000067715;ENSG00000069329;ENSG00000070087;ENSG00000070808;ENSG00000078053;ENSG00000079482;ENSG00000081803;ENSG00000087470;ENSG00000092531;ENSG00000099365;ENSG00000101152;ENSG00000101204;ENSG00000101298;ENSG00000102003;ENSG00000102189;ENSG00000103723;ENSG00000103769;ENSG00000104888;ENSG00000107130;ENSG00000107295;ENSG00000107758;ENSG00000108306;ENSG00000109189;ENSG00000115839…
GO:0010608	posttranscriptional regulation of gene expression	0.210487	1.90003	0	0.0958603	400	119	3646;1655;22916;56853;5901;79068;54542;84271;55364;7529;54487;7534;3184;11051;2185;2058;6191;9125;3609;1979;351;26523;90806;2475;5436;51123;3192;27102;64410;6198;9887;57472;4691;9221;23191;253943;5431;9337;10128;83939;7175;23367;10526;27327;152789;10131;103;23173;23293;1974;56478;23424;5997;207;1983;11236;5036;3658;3842;2915;8021;4848;23381;29118;6726;1965;6256;1994;8893;9698;8087;54952;387;25983…	ENSG00000047315;ENSG00000047410;ENSG00000056586;ENSG00000066044;ENSG00000067560;ENSG00000070366;ENSG00000082516;ENSG00000083223;ENSG00000083312;ENSG00000086232;ENSG00000087263;ENSG00000090905;ENSG00000092847;ENSG00000100227;ENSG00000100354;ENSG00000100403;ENSG00000100664;ENSG00000100697;ENSG00000100722;ENSG00000101412;ENSG00000101489;ENSG00000102882;ENSG00000104408;ENSG00000106682;ENSG00000107929…
GO:0051656	establishment of organelle localization	0.207461	1.89045	0	0.0966097	411	184	23413;375;1778;5901;81876;90411;55638;7534;64689;10652;1499;1780;9751;22820;83930;83696;8615;10239;815;2890;3192;1176;1137;8499;5119;9900;6860;10128;23621;6844;8678;10342;10483;9527;10059;5908;56681;998;63908;112755;22930;5217;585;55291;4131;1453;1639;10096;6812;81565;3837;10814;7345;8517;122553;6855;5036;547;84961;537;3798;80331;6857;153241;128637;10959;60412;282991;5861;55288;8936;84376;55717;9…	ENSG00000002822;ENSG00000007168;ENSG00000010270;ENSG00000033327;ENSG00000036054;ENSG00000036257;ENSG00000039523;ENSG00000054523;ENSG00000054654;ENSG00000067715;ENSG00000068400;ENSG00000070087;ENSG00000070540;ENSG00000070808;ENSG00000070831;ENSG00000071553;ENSG00000073969;ENSG00000075945;ENSG00000078018;ENSG00000079332;ENSG00000081803;ENSG00000082701;ENSG00000083937;ENSG00000085415;ENSG00000086598…
GO:0072350	tricarboxylic acid metabolic process	-0.379161	-1.92146	0.00898876	0.0974596	33	16	6391;55753;8802;54949;3420;5162;4191;81889;4967;3419;2271;50;1737;4190;1743;48	ENSG00000014641;ENSG00000091483;ENSG00000100412;ENSG00000101365;ENSG00000105953;ENSG00000119689;ENSG00000122729;ENSG00000143252;ENSG00000146701;ENSG00000150768;ENSG00000163541;ENSG00000166411;ENSG00000167985;ENSG00000168291;ENSG00000180185;ENSG00000197444
GO:0002446	neutrophil mediated immunity	0.208762	1.79327	0	0.0975927	324	121	5707;47;1778;6386;161;9948;8514;5869;5660;7415;51646;3482;6836;25852;10694;10213;51143;5236;5695;124583;427;10075;57020;7879;28988;23191;6868;2665;3417;6844;10857;7077;2171;5908;5713;5315;10576;5708;6709;961;138050;5686;2992;3837;5036;8649;102;5689;272;5834;5912;80331;94103;8621;23197;3326;55860;387;9522;1315;10493;9145;81567;9861;10097;5683;2519;5701;9761;23317;8826;4893;6727;3916;8773;10383;254…	ENSG00000001036;ENSG00000005893;ENSG00000008018;ENSG00000023318;ENSG00000030582;ENSG00000033122;ENSG00000035862;ENSG00000049860;ENSG00000057608;ENSG00000065883;ENSG00000067225;ENSG00000067560;ENSG00000067900;ENSG00000068650;ENSG00000069424;ENSG00000071127;ENSG00000075785;ENSG00000078902;ENSG00000079739;ENSG00000084733;ENSG00000085365;ENSG00000086758;ENSG00000091317;ENSG00000092531;ENSG00000096384…
GO:0097242	amyloid-beta clearance	0.509625	1.92693	0.00373832	0.0993444	14	9	4043;4035;3480;8301;348;3643;6722;1191;6093	ENSG00000067900;ENSG00000073921;ENSG00000112658;ENSG00000120885;ENSG00000123384;ENSG00000130203;ENSG00000140443;ENSG00000163956;ENSG00000171105
GO:1902850	microtubule cytoskeleton organization involved in mitosis	0.274651	1.91325	0.0017331	0.100436	106	43	5524;1778;5901;7415;10579;6867;3192;5116;5119;7175;2009;29072;3796;10769;27229;1639;81565;3837;10274;10426;3064;23122;387;8480;10844;6905;9525;440145;8766;27243;8243;4204;25978;9183;128866;1213;2770;9126;49856;10735;126731;5048;8658	ENSG00000007168;ENSG00000047410;ENSG00000066629;ENSG00000067560;ENSG00000068796;ENSG00000072501;ENSG00000083937;ENSG00000086827;ENSG00000101146;ENSG00000101421;ENSG00000101972;ENSG00000103769;ENSG00000108055;ENSG00000108424;ENSG00000116213;ENSG00000118007;ENSG00000119383;ENSG00000119541;ENSG00000126216;ENSG00000127955;ENSG00000130640;ENSG00000130724;ENSG00000131165;ENSG00000132341;ENSG00000137822…
GO:0060627	regulation of vesicle-mediated transport	0.194736	1.76386	0	0.103959	390	153	23413;10188;375;6386;5869;27072;8674;57030;55512;192683;4043;351;3190;815;9892;4983;6456;114781;7879;1137;8499;64854;6860;23621;6844;25999;9474;10483;9527;10059;22848;4035;5908;2889;56681;84251;54806;63908;961;112755;22930;5217;6812;10814;163;6855;55681;11236;3092;8301;84961;7251;5538;537;6857;5962;128637;79772;408;55823;23122;4851;348;5595;9699;26045;55680;8027;1948;558;9846;7275;7476;5532;8976;…	ENSG00000006125;ENSG00000006715;ENSG00000033327;ENSG00000042753;ENSG00000051382;ENSG00000057663;ENSG00000061938;ENSG00000065609;ENSG00000067715;ENSG00000067900;ENSG00000068400;ENSG00000070087;ENSG00000070808;ENSG00000071553;ENSG00000073060;ENSG00000073921;ENSG00000073969;ENSG00000074319;ENSG00000075785;ENSG00000077522;ENSG00000078018;ENSG00000079332;ENSG00000079482;ENSG00000081803;ENSG00000084093…
GO:0006413	translational initiation	0.238961	1.77713	0.00165563	0.106643	144	39	3646;6122;22916;6210;4736;55364;51386;10480;6191;6138;1979;10987;2475;5436;27102;64410;6198;9045;6124;253943;6146;83939;1973;7175;23367;8894;6129;1974;6128;1983;1965;6224;6256;8893;8665;6189;7458;51441;5499	ENSG00000008988;ENSG00000047410;ENSG00000086232;ENSG00000089009;ENSG00000100129;ENSG00000100316;ENSG00000100664;ENSG00000104408;ENSG00000106682;ENSG00000108443;ENSG00000114503;ENSG00000116251;ENSG00000121022;ENSG00000125977;ENSG00000134001;ENSG00000134419;ENSG00000144895;ENSG00000145191;ENSG00000145425;ENSG00000147604;ENSG00000148730;ENSG00000149100;ENSG00000154059;ENSG00000155506;ENSG00000156976…
GO:0043687	post-translational protein modification	0.206726	1.76399	0.00167785	0.106996	280	81	5707;81876;26100;8883;50717;146330;10920;8453;51667;150684;351;10987;10213;23014;5695;29106;64410;79672;23038;11167;26043;5687;8720;5682;9474;5713;5929;9817;23198;140739;5708;80204;8073;79791;6383;813;3895;5686;84861;51088;102;84961;5689;26249;5931;26224;5861;9306;5720;8451;55054;6500;348;26235;5710;9861;5683;154881;9903;2519;26234;2873;8139;5701;10116;4924;5862;140461;4218;5711;4240;8766;8945;69…	ENSG00000001036;ENSG00000005812;ENSG00000008018;ENSG00000013374;ENSG00000057663;ENSG00000068878;ENSG00000079999;ENSG00000085978;ENSG00000092010;ENSG00000095261;ENSG00000099910;ENSG00000100644;ENSG00000100902;ENSG00000102054;ENSG00000103035;ENSG00000103264;ENSG00000103769;ENSG00000104112;ENSG00000104388;ENSG00000104805;ENSG00000106588;ENSG00000108094;ENSG00000108306;ENSG00000109046;ENSG00000109790…
GO:0140029	exocytic process	0.274228	1.76782	0.00364299	0.107094	74	36	10652;9751;815;9900;6844;5341;63908;112755;6812;10814;23233;152579;6857;60412;55823;1488;11311;4218;8723;8773;58533;10490;26059;143425;23256;55770;65082;8867;93664;6814;26276;5899;54536;6809;6850;10890	ENSG00000067715;ENSG00000070808;ENSG00000081803;ENSG00000084733;ENSG00000092108;ENSG00000092531;ENSG00000099365;ENSG00000100568;ENSG00000101298;ENSG00000106636;ENSG00000112685;ENSG00000114520;ENSG00000115956;ENSG00000116266;ENSG00000125814;ENSG00000129515;ENSG00000131558;ENSG00000136631;ENSG00000136854;ENSG00000138190;ENSG00000139719;ENSG00000144036;ENSG00000144118;ENSG00000145920;ENSG00000159082…
GO:0034248	regulation of cellular amide metabolic process	0.219408	1.92941	0	0.108019	321	121	3646;22916;56853;79068;84271;55364;3184;2185;2058;6191;9125;5621;3609;55512;1979;351;26523;2475;5436;51123;27102;64410;6198;8439;57472;4691;9221;23191;253943;9337;10128;83939;7175;23367;27327;5163;152789;57103;10131;23173;1974;10418;56478;5997;207;1983;11236;5036;3658;8301;2915;4848;94103;29118;6726;1965;6256;1994;8893;9698;8087;54952;387;25983;348;25929;6197;5595;55239;7458;54464;708;10236;9148;…	ENSG00000035681;ENSG00000047410;ENSG00000066044;ENSG00000067560;ENSG00000067900;ENSG00000071051;ENSG00000073921;ENSG00000078237;ENSG00000082516;ENSG00000086232;ENSG00000087263;ENSG00000090905;ENSG00000092847;ENSG00000099622;ENSG00000099875;ENSG00000100030;ENSG00000100227;ENSG00000100354;ENSG00000100664;ENSG00000101391;ENSG00000101489;ENSG00000102882;ENSG00000103056;ENSG00000104408;ENSG00000106682…
GO:0036230	granulocyte activation	0.204806	1.76875	0	0.109984	323	120	5707;47;1778;6386;161;8514;5869;5660;7415;51646;3482;6836;25852;10694;10213;51143;5236;5695;124583;427;10075;57020;7879;28988;23191;2665;3417;6844;10857;7077;2171;5908;5713;5315;10576;5708;6709;961;138050;5686;2992;3837;5036;8649;102;5689;272;5834;5912;80331;94103;8621;23197;3326;55860;387;9522;55361;1315;10493;9145;81567;9861;10097;5683;2519;5701;9761;23317;8826;4893;6727;3916;8773;10383;2548;10…	ENSG00000001036;ENSG00000005893;ENSG00000008018;ENSG00000023318;ENSG00000030582;ENSG00000033122;ENSG00000035862;ENSG00000049860;ENSG00000057608;ENSG00000065883;ENSG00000067225;ENSG00000067560;ENSG00000067900;ENSG00000068650;ENSG00000069424;ENSG00000075785;ENSG00000078902;ENSG00000079739;ENSG00000084733;ENSG00000085365;ENSG00000086758;ENSG00000091317;ENSG00000092531;ENSG00000096384;ENSG00000099246…
GO:0050795	regulation of behavior	0.337078	1.74876	0.0128676	0.111606	37	15	2475;84251;54806;134;29105;348;4986;3350;55737;1268;4987;85445;6774;222236;1141	ENSG00000069329;ENSG00000070761;ENSG00000082556;ENSG00000118432;ENSG00000118473;ENSG00000125510;ENSG00000130203;ENSG00000135541;ENSG00000152910;ENSG00000160716;ENSG00000161048;ENSG00000163485;ENSG00000168610;ENSG00000178394;ENSG00000198793
GO:0098927	vesicle-mediated transport between endosomal compartments	0.379321	1.95237	0.00365631	0.111713	37	20	7879;84067;8678;51361;5289;5962;55823;84376;124997;5595;8411;23317;29062;2013;4478;11151;5604;64400;5594;84079	ENSG00000051009;ENSG00000075785;ENSG00000078142;ENSG00000100030;ENSG00000102189;ENSG00000102879;ENSG00000102882;ENSG00000105186;ENSG00000105875;ENSG00000126581;ENSG00000134709;ENSG00000137710;ENSG00000138246;ENSG00000147065;ENSG00000160695;ENSG00000166971;ENSG00000167716;ENSG00000168172;ENSG00000169032;ENSG00000213853
GO:0016050	vesicle organization	0.20876	1.74116	0	0.112303	260	83	375;6386;81876;90411;5869;64689;27072;29887;8674;9392;9519;83696;57030;8615;2890;7879;23339;5119;6860;84067;10342;10483;9527;51361;5289;9217;23673;56681;112755;55291;1453;9101;6812;10814;122553;6855;8301;7251;5584;6857;128637;10959;282991;5861;55823;84376;9919;7109;91782;149111;55361;8729;8027;29916;137492;8976;8411;1173;64601;55048;9525;23317;4218;8766;8773;27243;10564;10484;1385;7110;10490;1434…	ENSG00000002919;ENSG00000006715;ENSG00000028839;ENSG00000051009;ENSG00000067715;ENSG00000073921;ENSG00000074319;ENSG00000075785;ENSG00000078142;ENSG00000079332;ENSG00000083937;ENSG00000086300;ENSG00000086598;ENSG00000092108;ENSG00000092531;ENSG00000099365;ENSG00000100568;ENSG00000100934;ENSG00000101310;ENSG00000102003;ENSG00000102189;ENSG00000102879;ENSG00000103769;ENSG00000104888;ENSG00000106299…
GO:0006397	mRNA processing	-0.187397	-1.79196	0	0.113403	414	138	4858;53981;22827;56259;55696;9129;3191;10147;9295;9238;9410;57661;58509;79665;3185;22889;51645;5093;4809;51428;58506;201626;22794;8449;84991;84081;79760;10523;8570;10569;22826;9904;8189;6431;2968;6829;79869;22984;51639;54998;5356;58517;11100;5434;1207;8241;6634;284695;6633;2962;6732;10594;23210;90826;4904;65109;5411;10921;8220;10768;55749;5430;6629;6631;25804;54883;83759;8563;9343;54957;10179;165…	ENSG00000004487;ENSG00000021776;ENSG00000023734;ENSG00000054118;ENSG00000060339;ENSG00000060688;ENSG00000063244;ENSG00000064607;ENSG00000065978;ENSG00000070047;ENSG00000070495;ENSG00000072062;ENSG00000074201;ENSG00000075856;ENSG00000076053;ENSG00000079785;ENSG00000083896;ENSG00000085872;ENSG00000086589;ENSG00000088247;ENSG00000089280;ENSG00000096063;ENSG00000099817;ENSG00000100028;ENSG00000100056…
GO:0022406	membrane docking	0.225559	1.73474	0.00338983	0.114319	163	90	1778;10652;9751;7532;8615;815;7846;5116;7879;10121;117177;5341;9793;1781;23673;54806;112755;22919;4867;1453;1639;6812;7531;10814;5577;23233;152579;6857;60412;5518;7412;55823;1488;91147;22832;11311;51134;4218;8766;10383;11261;10490;10142;57488;23256;55770;4478;65082;203068;6814;26276;5899;26005;54536;4905;8636;9657;6093;5048;6809;80254;10890;27077;80321;146057;55014;1069;132320;22863;51762;23344;1…	ENSG00000005249;ENSG00000007168;ENSG00000046651;ENSG00000048342;ENSG00000067715;ENSG00000067900;ENSG00000070808;ENSG00000073969;ENSG00000075785;ENSG00000077380;ENSG00000078674;ENSG00000084733;ENSG00000092108;ENSG00000099365;ENSG00000099940;ENSG00000100568;ENSG00000101004;ENSG00000101298;ENSG00000101367;ENSG00000103769;ENSG00000103995;ENSG00000105514;ENSG00000105568;ENSG00000105971;ENSG00000106636…
GO:0043254	regulation of protein complex assembly	0.196684	1.74204	0	0.114414	355	117	11075;375;7067;55364;64223;1499;253260;27072;7415;2185;8780;24139;2475;57472;84250;8408;10093;6117;22976;23191;5894;147179;5921;9774;25999;10483;5341;10059;56681;998;7341;63908;6709;6712;112755;2965;329;5217;585;22919;6711;23580;1639;10096;6812;118;3054;26054;5781;5756;4848;5962;6249;153090;29767;550643;8936;2885;55823;10152;8451;348110;387;348;5581;10097;11124;56998;8976;5701;6722;64601;10923;10…	ENSG00000006715;ENSG00000029363;ENSG00000050748;ENSG00000067560;ENSG00000068971;ENSG00000069329;ENSG00000070087;ENSG00000070831;ENSG00000071051;ENSG00000077264;ENSG00000079332;ENSG00000085721;ENSG00000087274;ENSG00000087470;ENSG00000099365;ENSG00000100393;ENSG00000100503;ENSG00000100934;ENSG00000101310;ENSG00000101367;ENSG00000101782;ENSG00000102879;ENSG00000104435;ENSG00000105270;ENSG00000105373…
GO:0016482	cytosolic transport	0.266788	1.96718	0	0.117612	142	70	30845;55638;10652;57589;9559;6836;7879;84067;27147;8678;9980;9527;23041;51361;5289;400;84910;1639;112936;547;3798;55275;5962;55823;84376;55610;2580;124997;7109;23230;5595;8729;10097;8411;9905;23317;23258;51560;3916;29062;58533;2013;90196;55737;55435;10490;4478;51552;11151;5870;55773;23095;7813;54832;1213;5604;200576;64400;23033;5594;29886;84079;55062;54497;79735;51479;3799;4133;5868;5987	ENSG00000004766;ENSG00000008869;ENSG00000013016;ENSG00000036054;ENSG00000051009;ENSG00000054523;ENSG00000061987;ENSG00000067208;ENSG00000069329;ENSG00000070540;ENSG00000075785;ENSG00000078018;ENSG00000078142;ENSG00000083097;ENSG00000100030;ENSG00000100568;ENSG00000102189;ENSG00000102879;ENSG00000102882;ENSG00000104946;ENSG00000105186;ENSG00000105875;ENSG00000106266;ENSG00000106636;ENSG00000107036…
GO:0010256	endomembrane system organization	0.220637	1.93202	0	0.118237	337	138	30845;7534;5869;64689;5660;29887;8674;9519;6836;8615;60684;23204;6456;7879;287;5119;6860;23023;84067;9980;10483;64225;10059;51361;27348;5289;9217;65055;998;84251;51501;54828;22930;400;222068;79188;288;6711;207;1453;9101;1639;81565;6855;7251;9950;128637;54943;10959;282991;5861;25782;55823;10313;84376;2580;9919;3064;23122;10419;91782;1452;9788;55361;5595;9145;57003;8729;8027;10087;23141;115548;1374…	ENSG00000003393;ENSG00000007168;ENSG00000013016;ENSG00000028839;ENSG00000044090;ENSG00000051009;ENSG00000066455;ENSG00000066777;ENSG00000068615;ENSG00000070831;ENSG00000074319;ENSG00000075785;ENSG00000078142;ENSG00000083937;ENSG00000084733;ENSG00000085382;ENSG00000086300;ENSG00000086598;ENSG00000086827;ENSG00000087470;ENSG00000092969;ENSG00000099246;ENSG00000100030;ENSG00000100321;ENSG00000100462…
GO:0072512	trivalent inorganic cation transport	-0.349518	-1.73481	0.0149573	0.122557	30	16	1785;527;57192;392;9550;9230;8992;22853;529;9114;534;533;9296;535;51382;23545	ENSG00000033627;ENSG00000079805;ENSG00000090674;ENSG00000100554;ENSG00000113732;ENSG00000117410;ENSG00000128524;ENSG00000131100;ENSG00000136888;ENSG00000159720;ENSG00000164715;ENSG00000175220;ENSG00000185236;ENSG00000185344;ENSG00000185883;ENSG00000213760
GO:0042398	cellular modified amino acid biosynthetic process	-0.343548	-1.79286	0.0090703	0.124218	33	17	494143;376497;8985;79017;11315;2937;2686;501;79094;471;55748;2618;3029;2729;26873;4522;81490	ENSG00000001084;ENSG00000006625;ENSG00000063854;ENSG00000100714;ENSG00000100983;ENSG00000106397;ENSG00000116288;ENSG00000128965;ENSG00000130304;ENSG00000131067;ENSG00000133313;ENSG00000138363;ENSG00000143942;ENSG00000159131;ENSG00000164904;ENSG00000174915;ENSG00000178814
GO:0051668	localization within membrane	-0.223908	-1.71324	0.00238095	0.125769	133	42	2339;23513;55764;59283;57576;6616;7070;9379;3265;1020;23096;10427;1742;9211;8943;116841;22883;10815;729956;10369;10243;59284;5898;375056;1741;9093;9863;23184;146395;3208;8417;27020;9912;22872;85358;5590;8831;10368;160622;481;51304;9632	ENSG00000006116;ENSG00000006451;ENSG00000006740;ENSG00000065000;ENSG00000067606;ENSG00000079950;ENSG00000082458;ENSG00000103423;ENSG00000105605;ENSG00000108231;ENSG00000110076;ENSG00000117245;ENSG00000117899;ENSG00000121905;ENSG00000124313;ENSG00000132535;ENSG00000132639;ENSG00000138674;ENSG00000138802;ENSG00000142408;ENSG00000143153;ENSG00000143740;ENSG00000154096;ENSG00000154305;ENSG00000156642…
GO:0014075	response to amine	-0.352945	-1.80606	0.00678733	0.125851	32	14	445;6647;2902;4830;790;1787;9734;5999;5153;5530;2903;3066;41;3746	ENSG00000048052;ENSG00000084774;ENSG00000107614;ENSG00000110881;ENSG00000117152;ENSG00000123360;ENSG00000129159;ENSG00000130707;ENSG00000138814;ENSG00000142168;ENSG00000176884;ENSG00000183454;ENSG00000196591;ENSG00000239672
GO:0009259	ribonucleotide metabolic process	-0.182318	-1.76459	0	0.12647	403	159	79621;60490;64802;387712;9374;158;27089;374291;83440;6472;670;2639;2954;11315;84300;4707;1337;4694;10105;23205;5141;513;204;56474;4717;84532;57673;8459;55856;64087;8050;669;116;10476;522;6785;114789;4726;60481;4696;29796;51660;56975;405;132;84277;1723;4729;1739;4354;2982;25874;271;114;4698;4715;117145;9551;4725;4716;1497;4830;5571;9061;2766;79877;2821;8573;201626;1503;4724;4702;790;6391;55753;470…	ENSG00000002330;ENSG00000004455;ENSG00000005882;ENSG00000012660;ENSG00000040531;ENSG00000047230;ENSG00000060762;ENSG00000065518;ENSG00000065989;ENSG00000068120;ENSG00000075711;ENSG00000078295;ENSG00000084774;ENSG00000088682;ENSG00000095002;ENSG00000097021;ENSG00000099624;ENSG00000100075;ENSG00000100226;ENSG00000100577;ENSG00000102144;ENSG00000102967;ENSG00000103150;ENSG00000103740;ENSG00000105220…
GO:0051258	protein polymerization	0.212762	1.71718	0.00169205	0.127333	214	73	11075;375;64223;253260;2185;24139;1070;22921;2475;10093;23191;147179;5921;25999;10059;9793;6709;6712;5217;585;22919;6711;23580;27229;1453;1639;10096;81565;118;10426;5756;5962;6249;29767;8936;2885;10152;23122;348110;387;2258;5581;10844;3717;10097;8976;10810;440145;1027;4137;51199;9530;5881;55761;27243;56907;57606;55435;4204;10142;10552;29766;11151;157922;5879;10092;2764;8522;8440;11076;5063;1729;6…	ENSG00000007237;ENSG00000052841;ENSG00000067560;ENSG00000070087;ENSG00000071051;ENSG00000077264;ENSG00000087274;ENSG00000087470;ENSG00000096968;ENSG00000100503;ENSG00000101367;ENSG00000102879;ENSG00000104435;ENSG00000105270;ENSG00000106299;ENSG00000109171;ENSG00000111276;ENSG00000112290;ENSG00000115091;ENSG00000115306;ENSG00000120899;ENSG00000125746;ENSG00000126216;ENSG00000127914;ENSG00000128872…
GO:0018196	peptidyl-asparagine modification	-0.37921	-1.70189	0.0211864	0.127345	22	10	55662;1650;84447;58505;201595;6184;1603;2530;56886;4245	ENSG00000033170;ENSG00000129562;ENSG00000131446;ENSG00000136731;ENSG00000162298;ENSG00000163527;ENSG00000163902;ENSG00000166135;ENSG00000198856;ENSG00000244038
GO:0035418	protein localization to synapse	-0.279132	-1.73738	0.0105485	0.12925	58	23	2902;23513;51104;6616;9379;3265;1020;23096;1742;9211;116841;347730;22883;10815;9746;3831;2903;57555;23162;9912;5590;40;160622	ENSG00000006740;ENSG00000067606;ENSG00000107362;ENSG00000108231;ENSG00000108684;ENSG00000110076;ENSG00000124313;ENSG00000126214;ENSG00000132535;ENSG00000132639;ENSG00000138834;ENSG00000139182;ENSG00000143740;ENSG00000161835;ENSG00000162951;ENSG00000164885;ENSG00000168993;ENSG00000169992;ENSG00000171603;ENSG00000174775;ENSG00000176884;ENSG00000180900;ENSG00000183454
GO:0002931	response to ischemia	-0.319353	-1.7171	0.0205339	0.129982	37	13	10519;23417;8878;65018;56666;10273;6376;23017;1938;4217;5025;3767;24145	ENSG00000006210;ENSG00000073150;ENSG00000103150;ENSG00000103266;ENSG00000110218;ENSG00000135124;ENSG00000135472;ENSG00000158828;ENSG00000161011;ENSG00000167658;ENSG00000185043;ENSG00000187486;ENSG00000197442
GO:0002209	behavioral defense response	0.346648	1.69294	0.0198556	0.134275	32	18	2788;23542;6198;64854;7419;84961;348;116372;3350;2898;4204;2558;10522;7101;57679;55515;3358;4208	ENSG00000003393;ENSG00000008735;ENSG00000072182;ENSG00000078668;ENSG00000081189;ENSG00000108306;ENSG00000108443;ENSG00000109189;ENSG00000112333;ENSG00000130203;ENSG00000147246;ENSG00000150551;ENSG00000164418;ENSG00000169057;ENSG00000176533;ENSG00000177030;ENSG00000178394;ENSG00000186297
GO:0009123	nucleoside monophosphate metabolic process	-0.204717	-1.8136	0	0.134286	263	111	64802;1716;387712;158;27089;374291;83440;6472;670;11315;84300;4707;1337;4694;10105;513;204;4717;57673;1633;669;116;10476;522;114789;4726;4696;29796;56975;405;132;84277;1723;4729;1739;4354;271;4698;4715;9551;4725;4716;1497;5571;2821;8573;201626;4724;4702;790;6391;55753;4700;2987;10606;50808;80201;53343;7371;27109;29103;539;11165;11164;1854;4436;5230;471;203;54949;2819;1350;6834;4536;4697;4712;4710…	ENSG00000002330;ENSG00000004455;ENSG00000040531;ENSG00000065518;ENSG00000075711;ENSG00000084774;ENSG00000088682;ENSG00000095002;ENSG00000099624;ENSG00000102144;ENSG00000102967;ENSG00000105220;ENSG00000105953;ENSG00000106348;ENSG00000106992;ENSG00000107902;ENSG00000108179;ENSG00000109390;ENSG00000109971;ENSG00000110717;ENSG00000111775;ENSG00000114956;ENSG00000115286;ENSG00000116288;ENSG00000116337…
GO:1902903	regulation of supramolecular fiber organization	0.199064	1.6958	0	0.134663	273	107	11075;375;9948;11034;64223;253260;2185;24139;351;2475;7168;10093;203228;4771;23191;147179;5921;25999;5341;51763;998;6709;6712;961;9647;5217;585;22919;6711;23580;1639;10096;118;9037;5756;5962;55160;85464;6249;29767;8936;2885;10152;23122;348110;387;348;2909;2258;5581;10097;8976;22843;54434;1027;4137;51199;9530;5881;56907;57606;55435;4204;10142;8500;673;10552;4089;29766;10395;11151;88;157922;79709;1…	ENSG00000061676;ENSG00000066777;ENSG00000067560;ENSG00000067900;ENSG00000070087;ENSG00000070831;ENSG00000071051;ENSG00000071127;ENSG00000074964;ENSG00000077264;ENSG00000077522;ENSG00000078018;ENSG00000081189;ENSG00000084112;ENSG00000087274;ENSG00000099250;ENSG00000100034;ENSG00000100106;ENSG00000100503;ENSG00000101367;ENSG00000102879;ENSG00000104435;ENSG00000105270;ENSG00000106299;ENSG00000109171…
GO:0070585	protein localization to mitochondrion	0.237652	1.68779	0.00357782	0.136129	116	42	7385;7529;7534;7532;10953;9927;4836;90580;10075;23368;5599;10971;10059;3098;10425;8314;25813;6721;207;7531;9776;29928;55823;134266;10531;56947;1869;58480;26519;9804;4137;9530;84134;56993;801;54708;5562;7029;7323;25793;54332;10245	ENSG00000025772;ENSG00000086758;ENSG00000087470;ENSG00000088808;ENSG00000100216;ENSG00000100225;ENSG00000100347;ENSG00000101412;ENSG00000104381;ENSG00000107643;ENSG00000107959;ENSG00000108953;ENSG00000109332;ENSG00000114126;ENSG00000116574;ENSG00000116688;ENSG00000126768;ENSG00000132356;ENSG00000134308;ENSG00000134809;ENSG00000136448;ENSG00000140740;ENSG00000142208;ENSG00000142444;ENSG00000156515…
GO:0090150	establishment of protein localization to membrane	0.202383	1.6993	0.00165837	0.137509	254	77	6122;6386;2664;6210;4736;7529;7534;23471;64689;8674;6191;7532;6138;5621;23062;582;4836;23499;90580;23204;23368;9045;6124;117177;5599;6146;6844;10971;51763;65055;6129;4301;112755;6730;22930;25813;6128;288;6711;7531;6731;134;5584;7095;6747;29928;60412;6249;6726;6224;25782;9919;56947;2803;6745;6189;27065;1869;8504;5824;26519;4218;8766;6727;11261;6230;56993;90196;801;55737;56850;673;7029;283576;6227;…	ENSG00000008952;ENSG00000008988;ENSG00000034693;ENSG00000067167;ENSG00000068400;ENSG00000068615;ENSG00000069329;ENSG00000088808;ENSG00000089009;ENSG00000099365;ENSG00000100216;ENSG00000100316;ENSG00000100347;ENSG00000101412;ENSG00000103365;ENSG00000103769;ENSG00000107643;ENSG00000108953;ENSG00000114126;ENSG00000114745;ENSG00000114850;ENSG00000115306;ENSG00000115839;ENSG00000116251;ENSG00000117533…
GO:0050000	chromosome localization	0.290495	1.69618	0.0150376	0.137512	53	23	1778;3192;5119;8678;10096;81565;3837;91782;23212;10097;9525;8766;27243;81929;25978;51112;150465;9183;8452;128866;283489;56776;8697	ENSG00000036257;ENSG00000083937;ENSG00000085415;ENSG00000086827;ENSG00000094880;ENSG00000101421;ENSG00000103769;ENSG00000108424;ENSG00000114999;ENSG00000115091;ENSG00000119541;ENSG00000126581;ENSG00000130724;ENSG00000131165;ENSG00000138071;ENSG00000147457;ENSG00000153187;ENSG00000155816;ENSG00000166579;ENSG00000171853;ENSG00000179041;ENSG00000197102;ENSG00000198824
GO:0006353	DNA-templated transcription, termination	-0.269305	-1.73915	0.00675676	0.137578	64	39	80298;5440;6637;5437;8106;9013;5435;5441;4150;29894;9015;10978;84172;9014;22828;2068;53981;25885;64425;8189;2968;79869;5434;6634;30834;6908;5430;9533;4686;1477;6635;7343;29101;404672;134353;902;55339;51585;51692	ENSG00000066379;ENSG00000068654;ENSG00000071894;ENSG00000099817;ENSG00000100028;ENSG00000100142;ENSG00000100836;ENSG00000101138;ENSG00000103168;ENSG00000103495;ENSG00000104884;ENSG00000108312;ENSG00000112592;ENSG00000115750;ENSG00000119203;ENSG00000120832;ENSG00000125630;ENSG00000125755;ENSG00000134480;ENSG00000136709;ENSG00000136937;ENSG00000137054;ENSG00000143498;ENSG00000143977;ENSG00000147669…
GO:0009225	nucleotide-sugar metabolic process	-0.320242	-1.68288	0.0204082	0.138109	35	16	5372;197258;2135;10020;2987;23169;2592;80146;2931;5373;4351;2530;6675;56886;10007;4245	ENSG00000033170;ENSG00000100417;ENSG00000105723;ENSG00000113552;ENSG00000115652;ENSG00000116704;ENSG00000117143;ENSG00000131446;ENSG00000136731;ENSG00000140650;ENSG00000143774;ENSG00000157353;ENSG00000159921;ENSG00000162694;ENSG00000178802;ENSG00000213930
GO:0022613	ribonucleoprotein complex biogenesis	0.189609	1.70037	0	0.139633	388	138	11157;3646;6122;56853;1778;5901;10421;4736;51386;6430;11051;51747;10480;8780;11052;58155;90441;26523;84135;80153;27316;57472;9221;10969;9045;135295;203228;55015;64965;54552;22907;83939;57050;10946;9169;10659;6129;8559;8602;103;23451;6128;85395;1983;23560;11137;27339;5036;55623;25980;6839;1656;4848;6426;10146;550643;1965;10438;11168;8665;3326;10153;10419;6733;9416;25983;117246;55692;25929;23411;84…	ENSG00000003756;ENSG00000007392;ENSG00000048740;ENSG00000065183;ENSG00000066654;ENSG00000082516;ENSG00000083635;ENSG00000083845;ENSG00000085721;ENSG00000087263;ENSG00000087269;ENSG00000088930;ENSG00000089009;ENSG00000092847;ENSG00000096384;ENSG00000096717;ENSG00000099622;ENSG00000099995;ENSG00000100129;ENSG00000100316;ENSG00000100462;ENSG00000100650;ENSG00000100664;ENSG00000100697;ENSG00000101161…
GO:0051493	regulation of cytoskeleton organization	0.183813	1.68099	0.00149925	0.139861	412	157	11075;375;1778;9948;11034;64223;1499;253260;2185;24139;2475;3192;7168;10093;203228;4771;23191;147179;5119;5921;23077;85458;56890;25999;5341;7175;51763;4035;2044;85459;60312;998;6709;6712;961;54828;9647;10769;5217;585;22919;6711;23580;1639;10096;118;26054;10274;9037;5756;153241;5962;55160;85464;6249;29767;8936;2885;10152;23122;348110;387;5595;2909;2258;5581;91147;8480;4135;10097;8976;55704;22924;2…	ENSG00000005810;ENSG00000007168;ENSG00000046653;ENSG00000047410;ENSG00000061676;ENSG00000066777;ENSG00000067560;ENSG00000067900;ENSG00000070087;ENSG00000070831;ENSG00000071051;ENSG00000071127;ENSG00000072501;ENSG00000074964;ENSG00000077264;ENSG00000077522;ENSG00000078018;ENSG00000081189;ENSG00000083799;ENSG00000083937;ENSG00000084112;ENSG00000084764;ENSG00000087274;ENSG00000099250;ENSG00000100030…
GO:0006403	RNA localization	0.211436	1.67275	0.00323625	0.140261	201	79	22916;5901;84271;11260;10575;6430;23049;7014;6950;11052;6428;10694;6741;3192;9887;22948;9818;57122;10128;3178;7175;9793;29072;10576;8559;25909;23293;6432;5036;8021;59343;23381;6426;29118;908;23165;51637;7528;24148;84321;9908;8480;23212;55746;5813;3692;23039;9804;23404;57510;11269;65083;81929;26019;1660;9984;53371;130132;3181;55795;7048;55677;8683;4927;64062;9972;6429;7248;220988;3267;84248;9631;5…	ENSG00000047410;ENSG00000051596;ENSG00000069248;ENSG00000070366;ENSG00000074356;ENSG00000079134;ENSG00000085415;ENSG00000087302;ENSG00000100227;ENSG00000100650;ENSG00000100811;ENSG00000101146;ENSG00000101161;ENSG00000108559;ENSG00000109832;ENSG00000111581;ENSG00000111605;ENSG00000111786;ENSG00000112081;ENSG00000113569;ENSG00000114503;ENSG00000115484;ENSG00000115875;ENSG00000116350;ENSG00000116698…
GO:0061919	process utilizing autophagic mechanism	0.183082	1.66277	0	0.141408	413	140	310;81876;26100;5660;10325;23118;64223;27072;7415;9559;9373;9927;11337;2475;8396;64121;5565;7879;23339;23710;8408;526;203228;55187;8925;5599;8678;9474;10483;10059;23367;5289;83636;23673;493856;10193;7416;57103;9895;91445;57521;22930;84861;9528;10769;6721;207;7345;30849;8517;112936;10135;8649;64419;7251;9776;26249;60412;5861;25782;55823;124997;3064;84749;55763;55054;9517;8131;23411;23230;5595;2724…	ENSG00000004142;ENSG00000006715;ENSG00000032742;ENSG00000034713;ENSG00000040633;ENSG00000047249;ENSG00000048707;ENSG00000051382;ENSG00000055208;ENSG00000057663;ENSG00000061337;ENSG00000066135;ENSG00000066739;ENSG00000069329;ENSG00000069869;ENSG00000074319;ENSG00000075785;ENSG00000078142;ENSG00000078237;ENSG00000078902;ENSG00000080546;ENSG00000083750;ENSG00000083937;ENSG00000085978;ENSG00000087470…
GO:0140053	mitochondrial gene expression	-0.229318	-1.84712	0	0.141992	152	76	57570;90480;64981;9692;5442;55005;219927;80222;54802;219402;3028;6183;78988;84769;51263;64928;6472;57038;84300;51001;64968;26589;64979;5188;28973;128308;51067;3396;79590;283459;87178;28977;51021;63875;81554;92259;9238;92170;51069;60488;64951;54460;54998;51095;23107;55278;65008;6182;7284;51258;65005;25821;84545;130916;55168;57129;64975;28958;54148;29088;51642;51081;54534;51650;28998;51253;55173;55…	ENSG00000043514;ENSG00000048544;ENSG00000055950;ENSG00000059691;ENSG00000061794;ENSG00000062582;ENSG00000072506;ENSG00000072756;ENSG00000085760;ENSG00000090263;ENSG00000096080;ENSG00000099821;ENSG00000100890;ENSG00000101019;ENSG00000106105;ENSG00000111639;ENSG00000112651;ENSG00000113048;ENSG00000115364;ENSG00000116221;ENSG00000122033;ENSG00000122085;ENSG00000122140;ENSG00000125445;ENSG00000126814…
GO:0044772	mitotic cell cycle phase transition	0.186273	1.6733	0	0.142609	402	156	2029;1778;8883;29882;7532;9125;64682;8453;55031;351;51143;815;55920;6198;7846;5116;57472;10121;3550;6117;8882;25988;4863;80169;54617;9337;119504;7175;9793;1781;84687;79791;3688;57521;6873;84861;23133;10769;8554;22919;1453;1639;7531;5577;57325;91;3398;1876;4848;59343;5934;5962;5518;5471;5720;23122;8451;6500;91782;11073;5520;5885;25942;23595;1869;29883;58480;9525;54107;1027;8766;8945;51433;10383;27…	ENSG00000004897;ENSG00000005249;ENSG00000007168;ENSG00000022267;ENSG00000033800;ENSG00000036257;ENSG00000047410;ENSG00000057935;ENSG00000058091;ENSG00000060069;ENSG00000061337;ENSG00000064313;ENSG00000070808;ENSG00000077380;ENSG00000077684;ENSG00000080802;ENSG00000086827;ENSG00000089053;ENSG00000091651;ENSG00000092010;ENSG00000094880;ENSG00000097046;ENSG00000099910;ENSG00000100225;ENSG00000100393…
GO:0015931	nucleobase-containing compound transport	0.208867	1.66461	0.00481541	0.142709	198	77	22916;5901;84271;11260;6430;51006;23049;7014;79085;11052;6428;9197;6741;55186;10237;3192;9887;9818;57122;10128;3178;7175;9793;29072;25909;23293;6432;5036;8021;134;59343;23381;6426;29118;23165;84912;51637;84321;9908;8480;23212;55746;5813;3692;23039;9804;57510;11269;65083;81929;26019;1660;9984;53371;130132;55032;3181;55795;7048;55677;8683;4927;64062;23443;9972;6429;7248;220988;3267;84248;9631;56943…	ENSG00000047410;ENSG00000051596;ENSG00000069248;ENSG00000070366;ENSG00000074356;ENSG00000079134;ENSG00000080189;ENSG00000085415;ENSG00000087302;ENSG00000100227;ENSG00000100650;ENSG00000101146;ENSG00000108559;ENSG00000109832;ENSG00000111581;ENSG00000111605;ENSG00000111786;ENSG00000112081;ENSG00000113569;ENSG00000114120;ENSG00000114503;ENSG00000115875;ENSG00000116350;ENSG00000116698;ENSG00000117620…
GO:0019058	viral life cycle	0.214745	1.67453	0.00330033	0.144046	185	60	1655;5901;81876;89853;7415;3609;5886;7879;5119;51495;9474;23367;64848;51763;9217;998;156;103;3688;64710;3837;7251;1656;128637;22954;5481;5861;3326;4684;6733;55054;27336;4851;348;91782;1488;55223;5094;1948;558;137492;29883;8411;55048;9525;3916;27243;23087;90678;51271;1642;25978;9213;9798;6598;4774;9712;3693;9972;128866	ENSG00000047188;ENSG00000057663;ENSG00000069275;ENSG00000070831;ENSG00000074319;ENSG00000074696;ENSG00000075785;ENSG00000082781;ENSG00000083937;ENSG00000085978;ENSG00000096384;ENSG00000099956;ENSG00000101421;ENSG00000102189;ENSG00000102241;ENSG00000104228;ENSG00000108424;ENSG00000108654;ENSG00000110367;ENSG00000116525;ENSG00000119401;ENSG00000119541;ENSG00000124164;ENSG00000124789;ENSG00000125266…
GO:1990089	response to nerve growth factor	0.306215	1.65735	0.0288809	0.144406	44	23	11075;351;6456;57498;11021;2889;207;1453;9101;23527;8936;1869;4916;4137;1385;673;11151;1783;23095;867;1398;5764;5906	ENSG00000054523;ENSG00000101412;ENSG00000102879;ENSG00000104435;ENSG00000105894;ENSG00000107263;ENSG00000107295;ENSG00000110395;ENSG00000111737;ENSG00000112290;ENSG00000114331;ENSG00000116473;ENSG00000118260;ENSG00000134313;ENSG00000135720;ENSG00000138592;ENSG00000140538;ENSG00000141551;ENSG00000142192;ENSG00000142208;ENSG00000157764;ENSG00000167193;ENSG00000186868
GO:0050951	sensory perception of temperature stimulus	0.446878	1.66574	0.035461	0.144437	13	9	114781;134;10893;4986;2063;56925;2047;4923;6387	ENSG00000079257;ENSG00000082556;ENSG00000101188;ENSG00000107562;ENSG00000125966;ENSG00000154928;ENSG00000160113;ENSG00000163485;ENSG00000183826
GO:0016569	covalent chromatin modification	0.184121	1.6547	0	0.144559	384	144	7874;80335;64769;322;55818;23326;1499;22823;58508;2145;84312;55140;9643;64324;51317;55683;10075;22976;5599;55274;9474;9759;10902;7334;51111;5929;29072;165918;23186;57634;8473;8314;9647;1786;23133;10933;6018;4674;51780;57325;3054;11137;22992;10765;6839;84159;9070;6871;5931;284058;221656;546;408;51616;51366;64754;10419;55209;6500;23411;23168;5595;57708;1107;23304;25942;151050;7319;3717;80314;23081;…	ENSG00000005302;ENSG00000006712;ENSG00000008083;ENSG00000024048;ENSG00000025293;ENSG00000032219;ENSG00000043143;ENSG00000048649;ENSG00000054267;ENSG00000055609;ENSG00000057663;ENSG00000057935;ENSG00000066135;ENSG00000068024;ENSG00000073614;ENSG00000077684;ENSG00000077721;ENSG00000084093;ENSG00000084676;ENSG00000085224;ENSG00000086758;ENSG00000089094;ENSG00000089902;ENSG00000096070;ENSG00000096717…
GO:0097327	response to antineoplastic agent	0.267869	1.64909	0.0178571	0.145205	70	20	3184;1499;6198;57539;440;8754;3178;23367;2235;9101;51780;102;546;64754;54464;4924;2629;842;1317;5562	ENSG00000066926;ENSG00000070669;ENSG00000085224;ENSG00000104805;ENSG00000108443;ENSG00000114127;ENSG00000118965;ENSG00000120733;ENSG00000132356;ENSG00000132906;ENSG00000135486;ENSG00000136868;ENSG00000137845;ENSG00000138592;ENSG00000138668;ENSG00000155506;ENSG00000168036;ENSG00000168615;ENSG00000177628;ENSG00000185420
GO:0031929	TOR signaling	0.24042	1.65146	0.0108108	0.145274	98	46	10325;64223;253260;369;1979;2475;64121;6198;203228;23367;9681;57521;84861;207;8649;729438;197131;8131;23411;27244;23304;55704;96459;167359;81929;3091;5562;23677;79726;220441;26268;7248;8841;84219;6396;83667;153129;10000;57600;6194;94056;126282;140775;10641;10269;121268	ENSG00000024048;ENSG00000052795;ENSG00000078061;ENSG00000080546;ENSG00000083750;ENSG00000084073;ENSG00000085415;ENSG00000096717;ENSG00000099910;ENSG00000100150;ENSG00000100644;ENSG00000103091;ENSG00000103148;ENSG00000108443;ENSG00000109270;ENSG00000112146;ENSG00000114388;ENSG00000115355;ENSG00000116954;ENSG00000117020;ENSG00000127580;ENSG00000130147;ENSG00000130766;ENSG00000132356;ENSG00000137154…
GO:0007200	phospholipase C-activating G protein-coupled receptor signaling pathway	0.278822	1.64111	0.0216607	0.150428	56	51	2767;1128;2915;4986;4987;1524;88;887;150;2782;1129;1910;3358;2922;2149;64805;9368;2911;5733;183;4883;5745;1812;2099;51196;5028;636;10161;55107;2828;2859;1813;3269;2769;148;6869;719;1906;4829;2846;4988;1902;3356;2151;4985;9456;3062;7052;1240;2840;80045	ENSG00000050628;ENSG00000060558;ENSG00000077522;ENSG00000078369;ENSG00000078401;ENSG00000082556;ENSG00000088256;ENSG00000091831;ENSG00000102468;ENSG00000109062;ENSG00000110148;ENSG00000112038;ENSG00000113389;ENSG00000115353;ENSG00000116329;ENSG00000120907;ENSG00000125510;ENSG00000131620;ENSG00000134443;ENSG00000135577;ENSG00000135744;ENSG00000136160;ENSG00000137252;ENSG00000138193;ENSG00000139679…
GO:0009141	nucleoside triphosphate metabolic process	-0.206488	-1.81684	0	0.150471	253	107	64802;1716;387712;27089;374291;83440;6472;670;11315;84300;4707;1337;4694;10105;513;204;56474;4717;57673;25939;669;116;10476;522;114789;4726;4696;29796;79077;56975;405;132;84277;4729;4698;4715;9551;4725;4716;1497;4830;5571;2821;201626;1503;4724;4702;790;6391;55753;4700;2987;50808;80201;7371;27109;29922;29103;539;11164;1854;4436;5230;8802;203;54949;2819;1350;6834;4536;4697;4712;4710;3614;30968;6501…	ENSG00000002330;ENSG00000004455;ENSG00000040531;ENSG00000047230;ENSG00000065518;ENSG00000084774;ENSG00000088682;ENSG00000095002;ENSG00000099624;ENSG00000100226;ENSG00000101347;ENSG00000102144;ENSG00000105220;ENSG00000105953;ENSG00000106348;ENSG00000106992;ENSG00000108179;ENSG00000109390;ENSG00000109971;ENSG00000110717;ENSG00000111775;ENSG00000114956;ENSG00000115286;ENSG00000116288;ENSG00000116459…
GO:0006898	receptor-mediated endocytosis	0.206839	1.6378	0.00330033	0.151113	204	66	10188;375;6386;161;1211;3482;4043;351;3190;2890;9892;4983;6456;28988;64854;22848;4035;84251;54806;156;3688;5298;163;55681;3092;8301;5538;8936;2885;408;85021;2580;5648;348;26045;1948;157;115548;57720;8976;1173;23317;23208;50632;10525;54550;9829;29978;5291;821;7048;4734;23607;8867;1191;5879;143458;57007;1213;84896;6457;6622;4040;200576;60682;867	ENSG00000006125;ENSG00000051382;ENSG00000061938;ENSG00000065609;ENSG00000069869;ENSG00000070018;ENSG00000073921;ENSG00000079482;ENSG00000100077;ENSG00000103154;ENSG00000106299;ENSG00000107295;ENSG00000109189;ENSG00000110395;ENSG00000112290;ENSG00000112305;ENSG00000115020;ENSG00000115977;ENSG00000116675;ENSG00000118473;ENSG00000120885;ENSG00000122705;ENSG00000123384;ENSG00000125266;ENSG00000127022…
GO:0032418	lysosome localization	0.285838	1.62275	0.0198198	0.158963	51	21	6844;6812;81565;10814;282991;25940;4135;9846;8723;8773;58533;54849;65082;9842;23095;54664;55207;26276;867;5293;6850	ENSG00000033327;ENSG00000054523;ENSG00000092531;ENSG00000106460;ENSG00000110395;ENSG00000114520;ENSG00000119812;ENSG00000129515;ENSG00000134108;ENSG00000136854;ENSG00000139719;ENSG00000140995;ENSG00000145920;ENSG00000165025;ENSG00000166579;ENSG00000171533;ENSG00000171608;ENSG00000184056;ENSG00000196072;ENSG00000220205;ENSG00000225190
GO:0050890	cognition	0.199269	1.62494	0.00846024	0.159297	230	85	23373;7067;5621;57030;1979;351;23542;2890;2475;6198;114781;23259;1137;23191;6860;9980;267;3156;152789;4763;1128;3688;9993;10769;585;8554;5577;6100;577;7419;8301;3845;2915;134;5538;57338;29767;85461;3064;348;3776;10636;2258;4986;378;3643;6509;10097;6547;5532;55180;6722;23152;4137;9610;4130;5923;6529;1385;1268;4204;3091;673;25978;1524;9369;2558;10522;8867;5582;26047;2764;25836;84896;84502;54207;477…	ENSG00000005249;ENSG00000007168;ENSG00000008735;ENSG00000018625;ENSG00000021645;ENSG00000033800;ENSG00000058335;ENSG00000070413;ENSG00000073921;ENSG00000078668;ENSG00000079432;ENSG00000082482;ENSG00000082556;ENSG00000083937;ENSG00000085788;ENSG00000092051;ENSG00000100030;ENSG00000100433;ENSG00000100644;ENSG00000100678;ENSG00000101204;ENSG00000104888;ENSG00000105662;ENSG00000105894;ENSG00000107758…
GO:0008356	asymmetric cell division	0.427529	1.62582	0.037037	0.160873	15	10	10096;10636;2258;10097;85440;6660;2119;10890;3622;56288	ENSG00000084733;ENSG00000115091;ENSG00000116641;ENSG00000129682;ENSG00000134532;ENSG00000138071;ENSG00000148498;ENSG00000168556;ENSG00000169220;ENSG00000244405
GO:2000273	positive regulation of signaling receptor activity	-0.333953	-1.6507	0.021978	0.161208	32	11	1020;54413;2048;65018;10369;51389;8896;85358;55294;10368;5469	ENSG00000006116;ENSG00000106245;ENSG00000109670;ENSG00000111832;ENSG00000125686;ENSG00000133216;ENSG00000158828;ENSG00000164885;ENSG00000166862;ENSG00000196338;ENSG00000251322
GO:0070646	protein modification by small protein removal	0.192668	1.61476	0.00498339	0.162297	244	71	7874;5707;23326;7415;10920;55031;84132;10987;10213;5886;5695;57337;64854;23358;5687;54617;54764;8678;5682;7353;10868;5713;9817;23198;5708;5887;8473;8314;329;5686;9101;8078;8237;7345;8517;3054;26054;90268;7398;5689;51029;59343;55288;221656;51616;5720;8665;84749;387;5710;7528;80013;8027;54726;9861;5683;2873;5701;1540;9804;5711;10208;64750;26168;29843;10197;3091;51138;57695;25862;4089	ENSG00000008018;ENSG00000019995;ENSG00000067560;ENSG00000068878;ENSG00000070010;ENSG00000079387;ENSG00000079999;ENSG00000083799;ENSG00000092010;ENSG00000095261;ENSG00000100644;ENSG00000100811;ENSG00000100902;ENSG00000102226;ENSG00000103035;ENSG00000106346;ENSG00000106588;ENSG00000108854;ENSG00000109189;ENSG00000110330;ENSG00000111667;ENSG00000112701;ENSG00000115233;ENSG00000119318;ENSG00000121022…
GO:0061614	pri-miRNA transcription by RNA polymerase II	0.309268	1.6158	0.032967	0.163865	37	23	1655;4781;9759;6721;7528;6722;657;7003;3091;4089;2113;6774;4086;7042;8061;4088;6662;4775;650;688;5155;7040;4091	ENSG00000068024;ENSG00000072736;ENSG00000092969;ENSG00000100311;ENSG00000100644;ENSG00000100811;ENSG00000102554;ENSG00000105329;ENSG00000107779;ENSG00000108654;ENSG00000112658;ENSG00000125398;ENSG00000125845;ENSG00000134954;ENSG00000137834;ENSG00000141646;ENSG00000147862;ENSG00000166949;ENSG00000168610;ENSG00000170365;ENSG00000175592;ENSG00000187079;ENSG00000198911
GO:0007034	vacuolar transport	0.231904	1.60764	0.00690846	0.166936	117	43	375;30845;27072;7415;9392;3482;9737;7879;23339;203228;55187;5119;84067;8678;51361;138050;23295;30849;55681;7251;55275;79158;55823;84376;2580;81609;91782;23230;64601;9525;3916;27243;55737;10490;25978;4734;65082;1191;54664;26985;54832;128866;26276	ENSG00000006715;ENSG00000013016;ENSG00000048707;ENSG00000051009;ENSG00000069329;ENSG00000069869;ENSG00000074319;ENSG00000075785;ENSG00000083937;ENSG00000100568;ENSG00000101421;ENSG00000102858;ENSG00000106460;ENSG00000111670;ENSG00000119541;ENSG00000120885;ENSG00000126581;ENSG00000129003;ENSG00000130724;ENSG00000131165;ENSG00000134709;ENSG00000135966;ENSG00000136021;ENSG00000139719;ENSG00000141252…
GO:0008380	RNA splicing	0.179726	1.60409	0	0.168757	357	82	9584;11157;10286;1655;22916;56853;10421;10625;3184;55599;6430;11051;51747;51493;58155;6428;6434;1195;79042;3190;8899;1479;27316;64121;5436;3192;3550;135295;8882;55015;5431;10283;57396;3178;23350;6651;10946;55660;9589;9169;11193;10659;1659;1993;84687;8559;23450;10992;23451;55094;6432;6100;57805;27339;3188;25980;9406;55234;6426;8621;51319;5518;1994;23543;11168;10419;6733;9416;27336;55692;25929;8074…	ENSG00000007392;ENSG00000013441;ENSG00000047315;ENSG00000048740;ENSG00000051596;ENSG00000065883;ENSG00000066044;ENSG00000067596;ENSG00000068394;ENSG00000076650;ENSG00000082516;ENSG00000087302;ENSG00000087365;ENSG00000100220;ENSG00000100320;ENSG00000100462;ENSG00000100650;ENSG00000101161;ENSG00000101489;ENSG00000102241;ENSG00000105568;ENSG00000107105;ENSG00000108561;ENSG00000108654;ENSG00000108819…
GO:0030099	myeloid cell differentiation	0.188253	1.60205	0.00157978	0.168948	278	90	94081;9948;7067;6670;1499;2185;29887;58508;4779;351;26523;54977;2475;27102;27327;5929;998;10006;10193;4763;6777;10935;23054;2739;118;4090;91;5781;3658;2194;3398;537;865;9070;6988;2551;23543;3313;8451;23411;51621;51522;25942;10296;8544;9644;3717;9846;56998;6722;221395;3692;192669;192670;3276;1385;29843;55170;842;1436;3091;64783;2033;4850;23112;29766;7048;65082;4853;4297;2113;6774;55646;60682;9991;…	ENSG00000006712;ENSG00000007168;ENSG00000032219;ENSG00000033327;ENSG00000055609;ENSG00000067955;ENSG00000069122;ENSG00000070831;ENSG00000071127;ENSG00000071553;ENSG00000079387;ENSG00000080802;ENSG00000081087;ENSG00000082641;ENSG00000086232;ENSG00000086300;ENSG00000087274;ENSG00000087842;ENSG00000090316;ENSG00000090905;ENSG00000092847;ENSG00000096717;ENSG00000096968;ENSG00000100320;ENSG00000100354…
GO:1901987	regulation of cell cycle phase transition	0.184552	1.59844	0.0015625	0.170778	312	121	1778;8883;29882;7532;9125;64682;55031;351;51143;55920;7846;5116;57472;10121;3550;22976;80169;54617;9337;119504;7175;9793;1781;84687;79791;57521;84861;10769;22919;1453;1639;7531;5577;3398;4848;59343;5934;5962;5518;5720;8451;6500;11073;5885;25942;1869;29883;9525;1027;8766;8945;51433;10383;79960;3276;10197;996;4204;1642;10142;2033;7029;4850;55795;26058;29766;29997;678;79027;25793;9555;5087;3275;3306…	ENSG00000004897;ENSG00000005249;ENSG00000006712;ENSG00000007168;ENSG00000022267;ENSG00000036257;ENSG00000047410;ENSG00000057935;ENSG00000058668;ENSG00000077380;ENSG00000077684;ENSG00000080802;ENSG00000086827;ENSG00000089053;ENSG00000092010;ENSG00000094880;ENSG00000097046;ENSG00000099910;ENSG00000099994;ENSG00000100225;ENSG00000100393;ENSG00000101367;ENSG00000101412;ENSG00000103264;ENSG00000103479…
GO:0032970	regulation of actin filament-based process	0.182692	1.57775	0.00484653	0.17161	292	105	375;9948;11034;64223;253260;2185;775;2475;7168;10093;203228;287;4771;23191;147179;5921;85458;5341;51763;4035;2044;998;7341;6709;6712;961;54828;9647;5217;585;6711;23580;10096;118;9037;5756;134;5962;55160;85464;29767;8936;2885;10152;23122;348110;387;2909;2258;5581;6262;10097;8976;55704;22843;54434;4916;57216;9530;5881;56907;55435;1436;10142;8500;673;7010;10552;4089;29766;23433;10395;11151;88;23607;…	ENSG00000018625;ENSG00000046653;ENSG00000061676;ENSG00000066777;ENSG00000067560;ENSG00000067900;ENSG00000070087;ENSG00000070831;ENSG00000071051;ENSG00000071127;ENSG00000074964;ENSG00000077264;ENSG00000077522;ENSG00000081189;ENSG00000084112;ENSG00000087274;ENSG00000099250;ENSG00000100034;ENSG00000100106;ENSG00000102879;ENSG00000106299;ENSG00000112290;ENSG00000112902;ENSG00000113721;ENSG00000115091…
GO:0045787	positive regulation of cell cycle	0.184408	1.5791	0.0066335	0.172764	286	112	1778;6210;23326;9125;351;51143;5886;55920;3192;6198;57472;84250;54617;9337;440;8678;7175;64848;85459;998;57521;6777;10769;100529261;3054;5781;3398;904;4848;153241;5934;5962;153090;22954;546;3326;8451;6733;387;5885;5581;25942;3643;1869;29883;22924;9525;26073;901;1027;8766;51433;79848;115426;6990;3276;9984;151195;4204;2033;7029;4850;55795;29766;9555;5087;905;3306;55023;150465;7101;11113;25836;5526;…	ENSG00000004142;ENSG00000006712;ENSG00000007168;ENSG00000036257;ENSG00000047188;ENSG00000047410;ENSG00000057935;ENSG00000067560;ENSG00000068971;ENSG00000070018;ENSG00000070669;ENSG00000070831;ENSG00000077782;ENSG00000079134;ENSG00000080802;ENSG00000082258;ENSG00000084764;ENSG00000085224;ENSG00000089053;ENSG00000092969;ENSG00000096384;ENSG00000097046;ENSG00000100393;ENSG00000101412;ENSG00000101843…
GO:0008277	regulation of G protein-coupled receptor signaling pathway	0.229563	1.58786	0.0155979	0.172805	99	27	2788;7529;9737;4836;8490;23349;11343;6002;5341;10868;84687;156;23173;5997;23295;6855;5064;1407;29767;408;10419;10636;9815;801;54550;55737;29978	ENSG00000008405;ENSG00000069329;ENSG00000074416;ENSG00000099864;ENSG00000100462;ENSG00000102003;ENSG00000102858;ENSG00000103154;ENSG00000108819;ENSG00000115956;ENSG00000116741;ENSG00000122733;ENSG00000128872;ENSG00000136448;ENSG00000136878;ENSG00000137486;ENSG00000139436;ENSG00000143248;ENSG00000159788;ENSG00000164024;ENSG00000166913;ENSG00000169220;ENSG00000173020;ENSG00000176533;ENSG00000188021…
GO:0016311	dephosphorylation	0.174887	1.56919	0.0030349	0.174074	364	143	2029;26012;5524;10421;7529;22978;3631;2281;5521;51231;2475;53;57223;9887;9663;5341;8776;51763;9562;3628;9665;5496;84687;57103;8073;6305;23293;55105;92370;9647;55291;7531;5781;1850;5801;392617;64419;134;23381;85464;2053;84064;5518;5516;3672;63935;124997;3326;9110;3064;79871;52;1408;81537;5520;56940;51251;23141;5499;3717;5532;51559;22843;23175;54434;55197;8826;8945;9530;23261;11261;163404;801;2629;…	ENSG00000003987;ENSG00000040933;ENSG00000058272;ENSG00000060069;ENSG00000063601;ENSG00000067900;ENSG00000068971;ENSG00000070366;ENSG00000073711;ENSG00000074211;ENSG00000076685;ENSG00000078237;ENSG00000081189;ENSG00000084112;ENSG00000092020;ENSG00000092969;ENSG00000092978;ENSG00000096384;ENSG00000096968;ENSG00000100034;ENSG00000100241;ENSG00000100330;ENSG00000100614;ENSG00000100982;ENSG00000101577…
GO:0010927	cellular component assembly involved in morphogenesis	0.24974	1.57994	0.0191638	0.174101	74	25	9948;5573;9519;71;4205;7168;287;3688;2817;128637;29767;23122;23405;6722;8443;9896;7110;4089;29766;88;5159;4628;1073;200576;3267	ENSG00000028839;ENSG00000063660;ENSG00000068305;ENSG00000071127;ENSG00000077522;ENSG00000100697;ENSG00000108946;ENSG00000112367;ENSG00000112658;ENSG00000113721;ENSG00000115020;ENSG00000116906;ENSG00000125875;ENSG00000128872;ENSG00000133026;ENSG00000138594;ENSG00000140416;ENSG00000141646;ENSG00000144747;ENSG00000145362;ENSG00000150093;ENSG00000163539;ENSG00000165410;ENSG00000173744;ENSG00000184009
GO:0060491	regulation of cell projection assembly	0.20637	1.58911	0.00328407	0.17413	163	77	1809;23637;2475;55920;23191;23061;125058;9474;9759;998;54828;5217;585;23580;115704;81565;2823;7419;5756;5064;153241;5962;128637;85464;25940;3064;2909;9148;23603;8976;55704;6722;1540;22873;54434;64786;25771;54662;163404;57465;23102;54849;23433;9842;4651;5879;7813;9712;8100;202018;23224;49856;10801;10602;23300;2596;54942;79735;10787;8829;5868;324;139818;64805;54874;5027;26052;255758;55607;2332;5590…	ENSG00000004838;ENSG00000011454;ENSG00000032742;ENSG00000054611;ENSG00000054654;ENSG00000057663;ENSG00000061676;ENSG00000067208;ENSG00000068024;ENSG00000070087;ENSG00000070831;ENSG00000078668;ENSG00000083799;ENSG00000084112;ENSG00000089041;ENSG00000099250;ENSG00000099864;ENSG00000102081;ENSG00000104946;ENSG00000106299;ENSG00000106799;ENSG00000107021;ENSG00000107954;ENSG00000110880;ENSG00000111913…
GO:0070988	demethylation	0.281785	1.57258	0.0394973	0.17489	46	23	7874;79068;55818;23133;51780;22992;10765;84159;1595;221656;54726;23081;221037;9682;84678;5253;200424;3720;5927;8846;25974;7403;54890	ENSG00000001630;ENSG00000008083;ENSG00000066135;ENSG00000073614;ENSG00000089094;ENSG00000091542;ENSG00000100601;ENSG00000107077;ENSG00000115548;ENSG00000117139;ENSG00000120733;ENSG00000132763;ENSG00000140718;ENSG00000147050;ENSG00000150347;ENSG00000164164;ENSG00000165097;ENSG00000171988;ENSG00000172943;ENSG00000173120;ENSG00000187555;ENSG00000187605;ENSG00000197724
GO:0006968	cellular defense response	0.36546	1.57041	0.0378788	0.175054	21	19	2185;8678;3688;1524;51715;7716;8061;8915;4688;4046;51473;7707;10312;3959;23601;8808;3702;11126;136	ENSG00000108679;ENSG00000110719;ENSG00000112210;ENSG00000113263;ENSG00000115598;ENSG00000116701;ENSG00000117281;ENSG00000120899;ENSG00000126581;ENSG00000130592;ENSG00000136451;ENSG00000142867;ENSG00000146038;ENSG00000150093;ENSG00000163848;ENSG00000168329;ENSG00000170425;ENSG00000175592;ENSG00000258227
GO:0031503	protein-containing complex localization	0.191907	1.58332	0.00660066	0.175462	246	98	22916;5901;84271;11260;6430;23049;7014;6428;6741;55920;4983;3192;9887;9818;64854;57122;11336;57539;28981;7175;29072;23293;112755;56899;6432;163;5036;3092;102;3842;8021;3798;23381;6426;29118;57560;55763;23165;11020;56912;84321;8480;1948;23212;11127;27065;9903;8976;55746;5813;51098;3692;55112;4218;440145;8766;11269;65083;81929;50632;26019;55737;79659;9984;53371;56850;3181;55795;79809;23426;55677;86…	ENSG00000006125;ENSG00000032742;ENSG00000033122;ENSG00000047410;ENSG00000051596;ENSG00000068400;ENSG00000068885;ENSG00000069248;ENSG00000069329;ENSG00000070366;ENSG00000075945;ENSG00000076716;ENSG00000079134;ENSG00000079482;ENSG00000083312;ENSG00000085415;ENSG00000090989;ENSG00000099365;ENSG00000100227;ENSG00000100360;ENSG00000100650;ENSG00000101052;ENSG00000101146;ENSG00000103769;ENSG00000105948…
GO:0099504	synaptic vesicle cycle	0.202177	1.58972	0.00163934	0.175946	172	65	23413;273;1499;9751;8674;57030;9373;815;71;4983;6456;114781;1137;23191;8499;9900;6860;6854;23621;6844;10059;5908;63908;112755;22930;5217;6812;10814;6855;84961;6453;80331;6857;2580;1488;9699;115548;7476;5532;8411;1000;8773;23208;801;9829;1268;26059;56850;673;143425;84162;821;6861;8867;5582;93664;6622;51760;1129;134957;1141;6093;9581;6809;8927	ENSG00000067715;ENSG00000067900;ENSG00000068400;ENSG00000070087;ENSG00000070808;ENSG00000078053;ENSG00000079482;ENSG00000081803;ENSG00000087470;ENSG00000092531;ENSG00000099365;ENSG00000101152;ENSG00000101204;ENSG00000101298;ENSG00000102003;ENSG00000102189;ENSG00000103528;ENSG00000104888;ENSG00000107130;ENSG00000107295;ENSG00000107758;ENSG00000108306;ENSG00000115839;ENSG00000116675;ENSG00000117533…
GO:0071166	ribonucleoprotein complex localization	0.227428	1.58017	0.013913	0.176195	109	46	22916;5901;84271;11260;6430;23049;6428;6741;9887;9818;57122;7175;29072;23293;6432;5036;8021;23381;6426;29118;23165;84321;8480;23212;55746;3692;11269;65083;81929;26019;9984;53371;3181;55795;55677;8683;4927;9972;6429;7248;3267;84248;9631;56943;5903;102724594	ENSG00000047410;ENSG00000051596;ENSG00000069248;ENSG00000070366;ENSG00000079134;ENSG00000085415;ENSG00000100227;ENSG00000100650;ENSG00000101146;ENSG00000108559;ENSG00000109832;ENSG00000111581;ENSG00000111786;ENSG00000112081;ENSG00000113569;ENSG00000114503;ENSG00000115875;ENSG00000116350;ENSG00000116698;ENSG00000120533;ENSG00000122068;ENSG00000122566;ENSG00000124789;ENSG00000126226;ENSG00000126883…
GO:0048872	homeostasis of number of cells	0.20137	1.59143	0.010101	0.176528	182	83	94081;54542;7067;6670;4779;54977;6868;8314;6777;4004;207;118;4090;91;5781;3658;3845;3398;272;6654;23543;3313;4851;51621;51522;10296;558;3717;5532;5052;6722;1540;221395;54700;1000;5881;3276;29843;3091;84524;5291;26058;29766;11151;4856;2113;3988;6774;55646;222236;60682;9991;30061;5926;116151;92;171023;3071;5293;55012;2146;10000;4208;4254;55366;6194;2149;5316;139818;8915;93974;9935;129138;6608;5027;…	ENSG00000032219;ENSG00000049130;ENSG00000051382;ENSG00000056586;ENSG00000069122;ENSG00000073536;ENSG00000079387;ENSG00000081189;ENSG00000082641;ENSG00000083799;ENSG00000085721;ENSG00000087274;ENSG00000089041;ENSG00000090316;ENSG00000092020;ENSG00000096968;ENSG00000100124;ENSG00000100320;ENSG00000100644;ENSG00000102879;ENSG00000106462;ENSG00000107758;ENSG00000107798;ENSG00000111843;ENSG00000112305…
GO:0031346	positive regulation of cell projection organization	0.179236	1.55128	0.00308166	0.17741	317	164	11075;375;2664;322;23373;2281;2185;29882;1809;816;9373;57611;23499;22902;2475;23191;6860;9139;57498;10059;9759;50618;9231;2889;998;81545;79791;54828;585;10154;5997;23580;4131;81565;2823;9037;5756;23654;5584;6857;5064;153241;153090;25940;3064;9897;387;348;2803;2909;9699;5362;4135;9148;10097;23603;8976;55704;6722;22873;8826;4916;4137;8766;54700;51199;56965;57118;5364;163404;9896;1268;54849;10507;20…	ENSG00000004838;ENSG00000006837;ENSG00000007168;ENSG00000018189;ENSG00000018236;ENSG00000033122;ENSG00000044090;ENSG00000044524;ENSG00000058404;ENSG00000061676;ENSG00000065320;ENSG00000067560;ENSG00000067715;ENSG00000067798;ENSG00000068024;ENSG00000068971;ENSG00000070831;ENSG00000074660;ENSG00000076356;ENSG00000077264;ENSG00000077782;ENSG00000078699;ENSG00000080371;ENSG00000085721;ENSG00000087470…
GO:0001764	neuron migration	0.216798	1.55631	0.0241796	0.177922	124	53	26012;92737;1499;816;9373;55140;815;84892;79791;585;4131;81565;2823;23654;153090;9860;84623;2258;1600;558;9289;6722;57630;4916;1399;5879;26468;25836;5191;200933;6774;4628;6695;116983;7026;1398;5048;54328;57698;10752;8846;9201;4208;4692;23060;8829;79625;3084;2260;84197;9856;7976;8828	ENSG00000007168;ENSG00000058404;ENSG00000070808;ENSG00000077782;ENSG00000081189;ENSG00000099250;ENSG00000099942;ENSG00000100601;ENSG00000103264;ENSG00000104290;ENSG00000106852;ENSG00000112357;ENSG00000112658;ENSG00000118257;ENSG00000129682;ENSG00000131584;ENSG00000131711;ENSG00000133026;ENSG00000133083;ENSG00000134014;ENSG00000134121;ENSG00000136238;ENSG00000136848;ENSG00000137055;ENSG00000137261…
GO:0035329	hippo signaling	0.303229	1.55446	0.0322581	0.177963	35	19	7529;4140;4771;6664;9231;8642;7531;7082;6789;7003;55233;60485;80014;79633;92597;9867;836;284086;26524	ENSG00000075413;ENSG00000101109;ENSG00000104067;ENSG00000108953;ENSG00000114978;ENSG00000150457;ENSG00000151208;ENSG00000151718;ENSG00000151748;ENSG00000160602;ENSG00000164305;ENSG00000166341;ENSG00000166913;ENSG00000173542;ENSG00000176887;ENSG00000186575;ENSG00000187079;ENSG00000196159;ENSG00000198961
GO:1903311	regulation of mRNA metabolic process	0.192304	1.56351	0.00165289	0.178357	219	68	1655;22916;56853;79068;7529;7534;3184;6430;11051;11052;6428;6434;3190;27316;90806;2475;5436;3192;135295;253943;9337;3178;6651;23367;9589;27327;10659;207;6432;27339;3842;8021;904;55234;6426;1994;23543;9698;8087;6733;79882;54464;26135;708;10236;51441;1869;4154;29883;10181;10914;23404;1660;64783;55095;3181;23112;55795;26058;60677;57721;5393;678;55677;8683;9261;1153;5978	ENSG00000003756;ENSG00000048740;ENSG00000066044;ENSG00000083312;ENSG00000084093;ENSG00000090060;ENSG00000090905;ENSG00000099622;ENSG00000100320;ENSG00000100354;ENSG00000100650;ENSG00000100722;ENSG00000101412;ENSG00000101489;ENSG00000108561;ENSG00000108654;ENSG00000110107;ENSG00000111605;ENSG00000111786;ENSG00000112081;ENSG00000114127;ENSG00000114416;ENSG00000114503;ENSG00000115875;ENSG00000122566…
GO:0031122	cytoplasmic microtubule organization	0.276927	1.55212	0.0480592	0.178644	48	18	1778;667;51361;27229;3837;10426;153241;84376;9748;10844;55704;4137;8766;57606;11261;84942;84056;157922	ENSG00000065613;ENSG00000102781;ENSG00000103769;ENSG00000108424;ENSG00000109171;ENSG00000115355;ENSG00000126216;ENSG00000130559;ENSG00000130640;ENSG00000134709;ENSG00000137822;ENSG00000151914;ENSG00000168172;ENSG00000168944;ENSG00000177082;ENSG00000186868;ENSG00000187446;ENSG00000197102
GO:0033044	regulation of chromosome organization	0.188968	1.55713	0.0100503	0.179206	252	79	7874;55818;54386;3184;10575;1499;22823;23049;7014;6950;64682;10694;4216;51143;64324;3192;22948;84250;3550;22976;5599;54552;80169;3178;8678;9474;7175;7334;10576;8473;23293;1786;84861;23133;4674;26054;23381;6871;546;908;408;51366;55209;23411;23168;5595;57708;5885;25942;54464;10111;23081;9252;4137;9320;51433;26036;79618;55170;996;9869;4204;3181;9682;55795;4089;6598;4302;55677;9555;51112;5253;4297;91…	ENSG00000004897;ENSG00000036257;ENSG00000047410;ENSG00000057663;ENSG00000062650;ENSG00000066135;ENSG00000070366;ENSG00000085224;ENSG00000085511;ENSG00000086827;ENSG00000089053;ENSG00000096717;ENSG00000099910;ENSG00000099956;ENSG00000100784;ENSG00000102882;ENSG00000104517;ENSG00000107077;ENSG00000107643;ENSG00000112200;ENSG00000112701;ENSG00000113141;ENSG00000113522;ENSG00000113648;ENSG00000114127…
GO:0006354	DNA-templated transcription, elongation	0.238182	1.55855	0.0346021	0.179469	89	39	22916;55140;5436;55250;3192;10771;5431;55193;29072;165918;2965;57805;904;8621;2074;27336;23168;8518;3150;4298;6921;6749;25920;10102;9984;55795;55677;905;11198;9150;27125;2963;54623;79577;80349;56943;2071;2146;6917	ENSG00000006712;ENSG00000015171;ENSG00000047315;ENSG00000060069;ENSG00000065883;ENSG00000070061;ENSG00000072364;ENSG00000079134;ENSG00000082258;ENSG00000092201;ENSG00000102241;ENSG00000106462;ENSG00000110768;ENSG00000114503;ENSG00000120533;ENSG00000123297;ENSG00000126226;ENSG00000129315;ENSG00000130382;ENSG00000134014;ENSG00000134371;ENSG00000134759;ENSG00000137815;ENSG00000140395;ENSG00000149136…
GO:0006836	neurotransmitter transport	0.191539	1.55983	0.00848896	0.180079	215	89	23413;9751;57030;815;54977;23204;1137;8499;9900;6860;6854;23621;6844;2752;4129;79751;10059;5908;206358;55238;63908;55117;4763;8604;112755;22930;5217;5997;6812;10814;6855;84961;5538;80331;6857;79772;55288;11230;6505;1488;81539;9699;7476;55327;8723;8773;6533;3350;6529;23208;58533;801;1268;26059;388662;673;143425;3749;6861;83733;8867;5582;93664;6538;6622;51760;1129;477;1141;7779;9581;6809;6850;3358;…	ENSG00000018625;ENSG00000046653;ENSG00000067715;ENSG00000069535;ENSG00000070087;ENSG00000070808;ENSG00000072041;ENSG00000081189;ENSG00000081803;ENSG00000082701;ENSG00000087470;ENSG00000089250;ENSG00000092531;ENSG00000099365;ENSG00000100505;ENSG00000101152;ENSG00000101204;ENSG00000101298;ENSG00000102003;ENSG00000103042;ENSG00000103528;ENSG00000104888;ENSG00000106688;ENSG00000107130;ENSG00000107282…
GO:0044843	cell cycle G1/S phase transition	0.191863	1.5418	0.0114943	0.184332	203	80	9125;8453;815;6198;57472;6117;8882;25988;4863;54617;9337;79791;3688;57521;23133;10769;8554;91;3398;1876;4848;59343;5934;5962;5471;5720;8451;23595;1869;29883;58480;54107;1027;79960;3276;10197;8065;2033;57695;5000;7029;4850;26058;79027;25793;3275;4176;55159;8452;23019;4173;143384;8317;6154;23594;54623;79577;246175;56241;10106;5537;493;4193;1032;2146;7027;9134;571;138151;4194;65992;6194;51379;8738;8…	ENSG00000006712;ENSG00000022267;ENSG00000033800;ENSG00000036257;ENSG00000058668;ENSG00000070808;ENSG00000077684;ENSG00000080802;ENSG00000091651;ENSG00000092010;ENSG00000097046;ENSG00000099994;ENSG00000100225;ENSG00000100393;ENSG00000101412;ENSG00000103264;ENSG00000103479;ENSG00000104738;ENSG00000106462;ENSG00000108094;ENSG00000108443;ENSG00000109917;ENSG00000111276;ENSG00000111596;ENSG00000113300…
GO:0043087	regulation of GTPase activity	0.171564	1.53991	0.0113821	0.184509	372	99	10188;2664;56882;81846;64223;253260;2185;57589;23637;116987;22821;8490;2475;55920;4983;23061;2665;10928;51495;5921;125058;8394;6002;10483;10059;2049;2044;2889;4649;9681;4301;4763;6305;3688;54828;22930;55531;5905;585;10154;5997;9411;1983;115704;81565;122553;577;57148;8301;23365;5910;23527;23654;5902;5962;128637;55160;10959;153090;6654;408;25782;3843;3268;8131;23348;10636;2909;5362;26130;23603;2873…	ENSG00000011454;ENSG00000017797;ENSG00000054611;ENSG00000057608;ENSG00000058335;ENSG00000061938;ENSG00000065150;ENSG00000066933;ENSG00000073921;ENSG00000074696;ENSG00000074964;ENSG00000076356;ENSG00000079482;ENSG00000084070;ENSG00000086598;ENSG00000087470;ENSG00000088387;ENSG00000091409;ENSG00000099901;ENSG00000099942;ENSG00000100150;ENSG00000100241;ENSG00000100401;ENSG00000100664;ENSG00000100934…
GO:0018209	peptidyl-serine modification	0.18584	1.54268	0.00809062	0.185048	240	94	282974;54386;253260;5062;23049;9125;369;351;1195;53944;51231;815;2475;64324;4140;6198;54969;8408;5894;9806;5599;23515;57452;51763;56983;156;57521;9647;10769;5217;207;1453;11137;388228;7295;5584;2074;408;3326;64754;6789;1452;6197;79893;5595;1756;5581;166614;1389;9252;1456;96459;4916;23171;10038;9530;29110;85440;5562;10142;673;7048;7786;23012;9261;5582;5601;8440;8317;6622;143888;5594;6093;2872;9451…	ENSG00000013441;ENSG00000027075;ENSG00000050748;ENSG00000052795;ENSG00000056050;ENSG00000058668;ENSG00000067900;ENSG00000070087;ENSG00000070808;ENSG00000071051;ENSG00000075413;ENSG00000078061;ENSG00000096384;ENSG00000097046;ENSG00000099875;ENSG00000100030;ENSG00000100034;ENSG00000100626;ENSG00000100749;ENSG00000100784;ENSG00000101109;ENSG00000102882;ENSG00000105053;ENSG00000107643;ENSG00000107742…
GO:0032386	regulation of intracellular transport	0.171347	1.53357	0	0.188372	356	99	23413;375;22916;1778;2664;5621;11052;815;22902;5116;10075;9221;1137;9818;8882;8499;6860;4947;23621;6844;10483;7175;10059;6342;51763;5908;65055;10425;56681;29072;998;63908;4763;1128;112755;8314;54828;22930;5905;5217;288;6721;4131;6812;81565;7531;10814;6855;5781;11132;11236;84961;8021;9776;7295;6857;5962;128637;55288;23209;55823;9919;3326;51366;3843;51465;56947;23411;5595;9699;3717;9846;7476;58480;…	ENSG00000018189;ENSG00000033327;ENSG00000047410;ENSG00000065150;ENSG00000067715;ENSG00000068400;ENSG00000068615;ENSG00000069869;ENSG00000070087;ENSG00000070808;ENSG00000070831;ENSG00000079332;ENSG00000086758;ENSG00000087470;ENSG00000092108;ENSG00000096384;ENSG00000096717;ENSG00000096968;ENSG00000099365;ENSG00000100401;ENSG00000100427;ENSG00000100934;ENSG00000101204;ENSG00000101310;ENSG00000102003…
GO:0040029	regulation of gene expression, epigenetic	0.190454	1.53424	0.0175719	0.189713	206	78	1655;5901;54487;1499;22823;9643;26523;5436;3192;57472;5431;9337;9759;10526;27327;103;23451;1786;23133;10933;6839;5931;2074;221656;1994;9698;8087;23347;23411;57708;23304;25942;23405;23264;80314;29883;3692;54107;9188;9611;57510;192669;192670;84333;1660;9869;5511;79670;4204;64783;2033;3181;23112;26058;55051;121536;9555;5253;60;10943;23019;6774;4086;5604;23318;51132;51742;5926;27161;3720;23408;2876;7…	ENSG00000005302;ENSG00000008083;ENSG00000024048;ENSG00000032219;ENSG00000047315;ENSG00000054267;ENSG00000055917;ENSG00000066044;ENSG00000068024;ENSG00000075624;ENSG00000083223;ENSG00000090905;ENSG00000092847;ENSG00000096717;ENSG00000100354;ENSG00000100393;ENSG00000100403;ENSG00000100697;ENSG00000101596;ENSG00000101945;ENSG00000102054;ENSG00000106462;ENSG00000108654;ENSG00000113300;ENSG00000113391…
GO:0010639	negative regulation of organelle organization	0.181081	1.53042	0.014658	0.190315	282	98	11075;55818;5573;54386;22823;7014;24139;51143;3192;7879;3550;6860;54552;146691;80169;3178;8678;56890;25999;9474;7175;10059;51763;10193;6709;6712;57103;23293;1786;84861;23133;5217;585;22919;6711;207;115704;118;5756;5962;29767;550643;546;51366;23122;84749;348110;23411;2258;5885;91147;10493;25942;54464;10111;23081;10040;4137;9320;9530;26036;27243;55170;79142;4204;8500;23256;9682;55795;4089;29766;659…	ENSG00000008083;ENSG00000040633;ENSG00000047410;ENSG00000057663;ENSG00000062650;ENSG00000066135;ENSG00000070087;ENSG00000070366;ENSG00000073614;ENSG00000075785;ENSG00000078237;ENSG00000085224;ENSG00000086827;ENSG00000087274;ENSG00000087470;ENSG00000092108;ENSG00000096717;ENSG00000099910;ENSG00000099956;ENSG00000100106;ENSG00000101367;ENSG00000101421;ENSG00000102879;ENSG00000104435;ENSG00000104517…
GO:0035456	response to interferon-beta	-0.426745	-1.58727	0.0541126	0.201647	13	8	7098;3659;87178;27429;51428;51079;824;3093	ENSG00000078140;ENSG00000115317;ENSG00000125347;ENSG00000138035;ENSG00000162909;ENSG00000164342;ENSG00000183258;ENSG00000186010
GO:0006605	protein targeting	0.175158	1.51898	0.0107198	0.202666	336	105	7385;6122;6386;2664;6210;4736;7529;7534;23471;6191;7532;6138;5621;7322;10953;9927;11337;90580;23204;10075;7879;11154;9045;6124;55187;117177;3417;6146;6342;51763;10425;6129;6730;8314;3295;25813;6128;288;6721;6731;30849;134;9776;51;5584;7095;79158;6747;29928;2053;60412;8540;6726;6224;55823;134266;8310;10531;56947;6745;23230;6189;9145;1384;8504;58480;8443;23480;5824;4924;26519;9804;390916;3155;9530;…	ENSG00000008952;ENSG00000008988;ENSG00000018510;ENSG00000025772;ENSG00000034693;ENSG00000048707;ENSG00000067167;ENSG00000069869;ENSG00000075785;ENSG00000083845;ENSG00000086758;ENSG00000087008;ENSG00000089009;ENSG00000095321;ENSG00000100216;ENSG00000100225;ENSG00000100316;ENSG00000100321;ENSG00000100347;ENSG00000100478;ENSG00000100568;ENSG00000101421;ENSG00000104381;ENSG00000104765;ENSG00000104805…
GO:0099177	regulation of trans-synaptic signaling	0.170403	1.51045	0.00642055	0.205565	365	99	26012;23413;375;56853;4884;23373;55638;2185;29882;7532;5621;2897;1979;351;816;23542;815;2890;2475;4983;127262;1137;23349;23191;8499;64854;8526;6860;23621;6844;2752;10059;729993;2171;5908;84687;63908;4763;4355;3688;112755;22930;10769;5217;2918;9101;6812;10814;5577;6855;84961;3845;2915;134;6857;57338;79772;55288;23154;2899;348;1009;10636;5581;9145;9699;26045;9148;54899;3717;27065;6547;7476;5532;672…	ENSG00000005249;ENSG00000008735;ENSG00000010322;ENSG00000011275;ENSG00000020129;ENSG00000058335;ENSG00000058404;ENSG00000067715;ENSG00000070087;ENSG00000070808;ENSG00000079482;ENSG00000084112;ENSG00000087470;ENSG00000096968;ENSG00000099365;ENSG00000100321;ENSG00000100678;ENSG00000101204;ENSG00000101489;ENSG00000102003;ENSG00000103769;ENSG00000105662;ENSG00000107130;ENSG00000107758;ENSG00000107954…
GO:0019080	viral gene expression	0.259473	1.5106	0.0363322	0.207491	53	21	51386;6882;6741;51763;64710;6667;904;22954;8665;55223;5094;51773;22879;1660;2033;6598;905;9150;5978;7391;7392	ENSG00000048649;ENSG00000060069;ENSG00000064995;ENSG00000069275;ENSG00000082258;ENSG00000084093;ENSG00000099956;ENSG00000100129;ENSG00000100393;ENSG00000103111;ENSG00000105698;ENSG00000116525;ENSG00000119401;ENSG00000129315;ENSG00000132376;ENSG00000135829;ENSG00000138385;ENSG00000158773;ENSG00000175390;ENSG00000185591;ENSG00000197111
GO:0007031	peroxisome organization	0.247274	1.51279	0.0367133	0.20858	66	24	7322;3417;5825;10059;6342;3295;51;2053;8540;8310;56947;65084;1384;8504;8443;5824;390916;3155;8800;7323;1891;8799;5191;5189	ENSG00000018510;ENSG00000034693;ENSG00000087008;ENSG00000087470;ENSG00000095321;ENSG00000104823;ENSG00000109332;ENSG00000112357;ENSG00000116171;ENSG00000116906;ENSG00000117305;ENSG00000117528;ENSG00000120915;ENSG00000127980;ENSG00000131508;ENSG00000131779;ENSG00000133835;ENSG00000138413;ENSG00000161533;ENSG00000162735;ENSG00000166575;ENSG00000166821;ENSG00000168958;ENSG00000213965
GO:0008202	steroid metabolic process	0.19535	1.51124	0.0232558	0.208909	176	66	47;5901;84649;5007;83930;4779;2222;351;6309;10654;11160;80025;6713;8720;84650;6342;3156;4598;6777;3295;6721;51706;3837;6667;9453;2194;3157;1595;2053;6256;11161;59338;348;23411;51741;2230;3069;9885;1718;31;9619;22937;4204;5562;2246;114879;1727;5087;5978;50814;6770;8879;3988;51478;134429;84681;64746;6307;51422;11218;949;51360;4801;9572;4047;4597	ENSG00000001630;ENSG00000010270;ENSG00000012174;ENSG00000021762;ENSG00000052802;ENSG00000062282;ENSG00000064703;ENSG00000073060;ENSG00000079459;ENSG00000082641;ENSG00000084093;ENSG00000096717;ENSG00000100243;ENSG00000104549;ENSG00000106617;ENSG00000107679;ENSG00000107798;ENSG00000108424;ENSG00000109929;ENSG00000110048;ENSG00000110921;ENSG00000112972;ENSG00000113161;ENSG00000113578;ENSG00000114650…
GO:0016999	antibiotic metabolic process	-0.237823	-1.58801	0.0194384	0.209616	80	29	6647;1497;10020;6391;55753;217;10013;7001;8802;54949;25824;3420;5162;65018;4191;84869;81889;2098;4967;3419;2271;50;1737;4190;10007;231;2534;1743;48	ENSG00000010810;ENSG00000014641;ENSG00000040531;ENSG00000085662;ENSG00000091483;ENSG00000094631;ENSG00000100412;ENSG00000101365;ENSG00000105953;ENSG00000111275;ENSG00000113552;ENSG00000119689;ENSG00000122729;ENSG00000126432;ENSG00000139684;ENSG00000142168;ENSG00000143252;ENSG00000145439;ENSG00000146701;ENSG00000150768;ENSG00000158828;ENSG00000159921;ENSG00000163541;ENSG00000166411;ENSG00000167815…
GO:0031050	dsRNA processing	0.280129	1.50046	0.0511073	0.214566	42	22	1655;54487;26523;103;9698;23405;23264;9611;192669;192670;5511;79670;3181;4086;5604;23318;27161;23369;65080;10269;29066;4088	ENSG00000055917;ENSG00000083223;ENSG00000084073;ENSG00000092847;ENSG00000100403;ENSG00000100697;ENSG00000108654;ENSG00000117751;ENSG00000122299;ENSG00000122566;ENSG00000123908;ENSG00000126070;ENSG00000128191;ENSG00000134644;ENSG00000134698;ENSG00000134744;ENSG00000135900;ENSG00000141027;ENSG00000160710;ENSG00000166949;ENSG00000169032;ENSG00000170365
GO:0023058	adaptation of signaling pathway	0.400462	1.50096	0.0770677	0.2159	15	5	51109;156;408;54550;29978	ENSG00000072042;ENSG00000103154;ENSG00000137486;ENSG00000173020;ENSG00000188021
GO:0006338	chromatin remodeling	-0.211926	-1.58886	0.0178117	0.21828	113	57	8850;3065;51412;86;9757;6603;55636;10014;11177;51548;10467;6944;54108;22890;283899;23421;8289;3149;55929;81611;23314;22955;10629;387103;10856;6602;6601;57459;8607;114803;26038;8932;473;80152;6605;201161;4678;84337;11164;6827;11335;2648;6830;6597;55011;9219;1108;9031;7150;57492;93973;6304;51341;57680;3066;1105;5928	ENSG00000009954;ENSG00000010803;ENSG00000029993;ENSG00000049618;ENSG00000066117;ENSG00000073584;ENSG00000077080;ENSG00000077463;ENSG00000100888;ENSG00000102901;ENSG00000104472;ENSG00000104872;ENSG00000106400;ENSG00000108604;ENSG00000108773;ENSG00000108840;ENSG00000109111;ENSG00000111642;ENSG00000113812;ENSG00000114166;ENSG00000116254;ENSG00000116478;ENSG00000117713;ENSG00000119042;ENSG00000122565…
GO:0051932	synaptic transmission, GABAergic	0.278807	1.49215	0.0593368	0.224285	39	14	23349;64854;4763;6812;3845;134;5581;2556;5881;6529;1268;11188;2558;85445	ENSG00000010322;ENSG00000011677;ENSG00000109189;ENSG00000118432;ENSG00000122733;ENSG00000133703;ENSG00000136854;ENSG00000152910;ENSG00000157103;ENSG00000163485;ENSG00000169750;ENSG00000171132;ENSG00000186297;ENSG00000196712
GO:0007215	glutamate receptor signaling pathway	-0.234986	-1.59139	0.0216867	0.225082	84	30	2914;747;1612;2902;81831;59283;823;2893;8851;2917;54413;2048;1742;221955;65018;2894;729956;10369;59284;2912;6376;146395;2903;57555;1393;85358;23025;10368;3745;2534	ENSG00000006116;ENSG00000006210;ENSG00000010810;ENSG00000014216;ENSG00000105605;ENSG00000124493;ENSG00000130477;ENSG00000132535;ENSG00000133216;ENSG00000134780;ENSG00000142408;ENSG00000145708;ENSG00000152578;ENSG00000158445;ENSG00000158828;ENSG00000164082;ENSG00000164535;ENSG00000166862;ENSG00000169181;ENSG00000169992;ENSG00000171208;ENSG00000176749;ENSG00000176884;ENSG00000182771;ENSG00000183454…
GO:0022412	cellular process involved in reproduction in multicellular organism	0.18531	1.48351	0.0194489	0.23504	190	44	56853;5901;29781;55818;5573;1499;2185;9519;2475;6198;80025;51361;64848;9665;23198;3688;130026;585;207;4867;4090;1656;128637;5518;29118;221656;6654;408;9897;51465;23304;9148;51441;57178;54888;22873;1738;27030;56907;192670;25981;7110;6595;79670	ENSG00000024048;ENSG00000025770;ENSG00000028839;ENSG00000037474;ENSG00000047188;ENSG00000068878;ENSG00000080503;ENSG00000083223;ENSG00000091140;ENSG00000101489;ENSG00000105568;ENSG00000107954;ENSG00000108175;ENSG00000108443;ENSG00000108946;ENSG00000109832;ENSG00000110367;ENSG00000113658;ENSG00000114841;ENSG00000115548;ENSG00000115904;ENSG00000119684;ENSG00000120899;ENSG00000125779;ENSG00000125875…
GO:0050769	positive regulation of neurogenesis	0.165579	1.47868	0.00613497	0.23539	377	185	26012;11075;375;2664;322;23373;55364;1499;2281;2185;29882;1809;351;816;9373;57611;23499;22902;2475;23376;23191;6860;9139;6664;57498;7077;10059;50618;9231;2889;6938;81545;79791;10154;5997;4131;1453;4674;81565;9037;27339;5756;3398;23654;5584;6857;153090;22954;10419;9897;387;4851;348;2803;10636;2909;9699;23405;5362;4135;9148;1600;1869;10097;23081;6722;221336;8826;4916;4137;8766;221938;54700;51199;56…	ENSG00000006837;ENSG00000007168;ENSG00000014123;ENSG00000018189;ENSG00000018236;ENSG00000027075;ENSG00000033122;ENSG00000035862;ENSG00000044090;ENSG00000044524;ENSG00000058404;ENSG00000064309;ENSG00000065320;ENSG00000065526;ENSG00000066135;ENSG00000067560;ENSG00000067715;ENSG00000068971;ENSG00000074660;ENSG00000076356;ENSG00000077264;ENSG00000077782;ENSG00000078699;ENSG00000080371;ENSG00000081189…
GO:0017156	calcium ion regulated exocytosis	0.202154	1.48006	0.0251799	0.235476	130	55	23413;375;9751;192683;815;1137;8499;9900;6860;23621;6844;10059;5908;63908;112755;22930;5217;6812;10814;6855;84961;51150;80331;6857;4851;1488;9699;7476;5532;8773;23208;11261;801;1268;26059;673;143425;6861;8867;5582;5978;93664;150;6814;51760;1129;1141;9581;6809;27445;5906;2771;5868;114088;783	ENSG00000067715;ENSG00000070087;ENSG00000070808;ENSG00000078808;ENSG00000081803;ENSG00000084093;ENSG00000087470;ENSG00000092531;ENSG00000099365;ENSG00000100505;ENSG00000101152;ENSG00000101204;ENSG00000101298;ENSG00000102003;ENSG00000103528;ENSG00000107130;ENSG00000107758;ENSG00000108306;ENSG00000114353;ENSG00000115839;ENSG00000116266;ENSG00000116473;ENSG00000118432;ENSG00000125814;ENSG00000126583…
GO:0062012	regulation of small molecule metabolic process	0.176021	1.4764	0.016129	0.236487	262	64	5901;84649;7415;2185;79085;2222;6309;9167;2475;10654;57223;5565;23038;11160;80025;6713;8720;4947;5341;10059;9759;51763;2171;3156;5163;8604;57103;4598;8473;6721;207;3837;1347;6667;9453;2194;3157;1595;2053;1407;4199;387;348;84912;23411;5581;10296;3643;5499;57486;31;3692;55578;9619;9611;22937;1268;51582;4946;3091;55022;5562;2246;8445	ENSG00000001630;ENSG00000008405;ENSG00000062282;ENSG00000065833;ENSG00000067560;ENSG00000068024;ENSG00000078237;ENSG00000079459;ENSG00000087470;ENSG00000090316;ENSG00000096717;ENSG00000100644;ENSG00000102710;ENSG00000104549;ENSG00000104904;ENSG00000108424;ENSG00000109929;ENSG00000110921;ENSG00000112695;ENSG00000112972;ENSG00000113161;ENSG00000113578;ENSG00000114650;ENSG00000115840;ENSG00000115944…
GO:0098727	maintenance of cell number	0.209964	1.48077	0.0338409	0.236742	116	42	55818;1499;22823;51123;5894;56478;79692;1656;4848;10893;1994;84376;8451;4851;23168;7476;23081;657;57216;1000;8243;6657;673;57721;4089;84678;140467;678;60485;5087;7101;4853;80306;25836;23019;6774;23318;9126;54623;79577;283149;27257	ENSG00000006712;ENSG00000066044;ENSG00000072501;ENSG00000089094;ENSG00000107077;ENSG00000107779;ENSG00000108055;ENSG00000110367;ENSG00000111596;ENSG00000112333;ENSG00000115548;ENSG00000118579;ENSG00000120963;ENSG00000125107;ENSG00000125966;ENSG00000132155;ENSG00000134250;ENSG00000134371;ENSG00000134744;ENSG00000137815;ENSG00000139842;ENSG00000141646;ENSG00000143033;ENSG00000145388;ENSG00000148400…
GO:0000910	cytokinesis	0.205296	1.47002	0.033101	0.238782	119	35	375;55964;57448;5119;5921;8678;6651;55660;23503;5289;11021;29072;998;25909;585;288;6711;9101;10096;54902;30849;9897;387;91782;5581;10097;9903;9525;8766;79848;27243;56907;801;25978;9798	ENSG00000011295;ENSG00000067560;ENSG00000070831;ENSG00000072121;ENSG00000078142;ENSG00000083937;ENSG00000100167;ENSG00000103769;ENSG00000104218;ENSG00000111737;ENSG00000115091;ENSG00000115306;ENSG00000115760;ENSG00000119541;ENSG00000126581;ENSG00000130724;ENSG00000131165;ENSG00000134278;ENSG00000138071;ENSG00000138592;ENSG00000140463;ENSG00000143761;ENSG00000145715;ENSG00000147457;ENSG00000151150…
GO:0008213	protein alkylation	0.201609	1.47265	0.0255537	0.239784	139	49	80335;55818;1499;22823;58508;2145;64324;22976;51111;5929;29072;80204;8473;1786;6018;11137;6839;9070;25940;546;5110;64754;10419;23411;23168;79091;23081;3276;55170;9869;4204;9682;10196;4089;6598;4302;55677;9555;5870;3275;7468;4297;55870;200424;51742;5926;54623;3720;80349	ENSG00000006712;ENSG00000008083;ENSG00000032219;ENSG00000054267;ENSG00000055609;ENSG00000066135;ENSG00000067365;ENSG00000085224;ENSG00000096717;ENSG00000099956;ENSG00000100462;ENSG00000101945;ENSG00000107077;ENSG00000108799;ENSG00000109685;ENSG00000110066;ENSG00000113648;ENSG00000115548;ENSG00000116539;ENSG00000117000;ENSG00000117222;ENSG00000118058;ENSG00000119812;ENSG00000120265;ENSG00000126457…
GO:0006720	isoprenoid metabolic process	0.238212	1.47052	0.0562613	0.240448	67	13	84649;51109;2222;10654;224;4035;3156;128;4598;6383;9453;2817;3157	ENSG00000062282;ENSG00000063660;ENSG00000072042;ENSG00000072210;ENSG00000079459;ENSG00000110921;ENSG00000112972;ENSG00000113161;ENSG00000123384;ENSG00000152904;ENSG00000163344;ENSG00000169439;ENSG00000197894
GO:0016197	endosomal transport	0.189529	1.46453	0.0231405	0.244505	186	75	51617;30845;89853;10652;7415;57589;8674;9559;6836;7879;23339;5119;27147;9527;11021;400;84910;1639;112936;8301;7251;23527;55275;282991;55610;7109;9897;81609;91782;8729;8027;27065;137492;8411;9905;64601;55048;9525;4218;8723;8766;23258;51560;27243;58533;50632;55737;51271;10490;54918;56850;25978;23426;51552;88;5870;55773;23325;7813;128866;1213;57679;200576;10123;29886;84079;10890;54497;79735;57554;46…	ENSG00000003393;ENSG00000004766;ENSG00000008869;ENSG00000013016;ENSG00000033122;ENSG00000036054;ENSG00000067208;ENSG00000068400;ENSG00000069329;ENSG00000073921;ENSG00000074319;ENSG00000075785;ENSG00000077522;ENSG00000083937;ENSG00000084733;ENSG00000091317;ENSG00000100568;ENSG00000101421;ENSG00000102189;ENSG00000103769;ENSG00000104946;ENSG00000105186;ENSG00000106266;ENSG00000106636;ENSG00000107036…
GO:0008214	protein dealkylation	0.302393	1.46041	0.0782123	0.248547	29	14	55818;23133;51780;22992;10765;84159;221656;23081;221037;9682;84678;5253;3720;5927	ENSG00000008083;ENSG00000066135;ENSG00000073614;ENSG00000089094;ENSG00000107077;ENSG00000115548;ENSG00000117139;ENSG00000120733;ENSG00000150347;ENSG00000165097;ENSG00000171988;ENSG00000172943;ENSG00000173120;ENSG00000197724

## Sheet: CUMS
geneSet	description	ES	NES	pValue	FDR	size	leadingEdgeNum	leadingEdgeId	userId
GO:0033108	mitochondrial respiratory chain complex assembly	0.480128	2.68338	0	0	89	61	54902;4705;4711;4720;4722;4725;4716;90639;4729;25915;6834;4723;4719;4700;493753;4701;4536;4713;4717;4540;57001;55967;7019;4710;4709;55572;4696;4698;4724;135154;100131801;51295;84300;4718;5018;4728;29078;79133;4707;4541;374291;790955;84987;4702;55863;90871;6901;55101;80224;137682;4706;28958;54949;4714;4535;4538;84275;4712;29796;6341;4695	ENSG00000004779;ENSG00000011295;ENSG00000023228;ENSG00000065518;ENSG00000099795;ENSG00000101247;ENSG00000102125;ENSG00000105341;ENSG00000108064;ENSG00000109390;ENSG00000110074;ENSG00000110717;ENSG00000115286;ENSG00000119013;ENSG00000119421;ENSG00000123545;ENSG00000128609;ENSG00000130159;ENSG00000130414;ENSG00000131495;ENSG00000133028;ENSG00000136521;ENSG00000137038;ENSG00000137288;ENSG00000140990…
GO:0010257	NADH dehydrogenase complex assembly	0.512867	2.64686	0	0	61	44	4705;4711;4720;4722;4725;4716;4729;25915;4723;4719;4700;4701;4536;4713;4717;4540;55967;4710;4709;55572;4696;4698;4724;51295;4718;5018;4728;29078;79133;4707;4541;374291;4702;55863;90871;6901;55101;80224;137682;4706;4714;4535;4538;4712	ENSG00000004779;ENSG00000023228;ENSG00000065518;ENSG00000099795;ENSG00000101247;ENSG00000102125;ENSG00000105341;ENSG00000109390;ENSG00000110074;ENSG00000110717;ENSG00000115286;ENSG00000119013;ENSG00000119421;ENSG00000123545;ENSG00000128609;ENSG00000130159;ENSG00000130414;ENSG00000136521;ENSG00000137038;ENSG00000140990;ENSG00000151366;ENSG00000151413;ENSG00000155463;ENSG00000156170;ENSG00000158864…
GO:0140053	mitochondrial gene expression	0.363161	2.22635	0	0.00237176	152	93	2617;87178;55699;85476;3396;60488;51069;5562;55037;4701;28998;7818;55052;11222;64969;64960;78988;65003;740;54534;7019;57038;51263;10128;51642;51258;54148;64949;29088;54998;60528;64978;51021;400916;5188;3035;84300;56945;5018;7284;10240;51001;10573;10102;26995;84545;64979;51116;64976;51264;54948;64965;51649;29074;6832;124995;64975;10884;65008;118487;10352;28977;115416;5442;28958;65080;9801;54460;96…	ENSG00000006744;ENSG00000055950;ENSG00000059691;ENSG00000061794;ENSG00000067704;ENSG00000086504;ENSG00000090263;ENSG00000096080;ENSG00000099821;ENSG00000102738;ENSG00000106105;ENSG00000108064;ENSG00000108561;ENSG00000108826;ENSG00000111639;ENSG00000112031;ENSG00000112110;ENSG00000112651;ENSG00000112996;ENSG00000114686;ENSG00000115364;ENSG00000116221;ENSG00000116874;ENSG00000116898;ENSG00000117593…
GO:0072350	tricarboxylic acid metabolic process	0.5153	2.23766	0	0.00291909	33	19	1737;6390;3421;3420;4190;6391;50;5162;8803;4967;6392;3419;2271;81889;5160;4191;8802;10873;48	ENSG00000014641;ENSG00000067829;ENSG00000091483;ENSG00000100412;ENSG00000101365;ENSG00000105953;ENSG00000117118;ENSG00000122729;ENSG00000131828;ENSG00000136143;ENSG00000143252;ENSG00000146701;ENSG00000150768;ENSG00000151376;ENSG00000163541;ENSG00000166411;ENSG00000168291;ENSG00000180185;ENSG00000204370
GO:1903311	regulation of mRNA metabolic process	-0.347669	-2.36518	0	0.00397816	219	107	11340;84872;3842;8313;51594;57060;23210;202559;55795;8087;22916;8241;11189;9238;54464;9646;246175;23404;60680;29890;23016;79882;79810;9589;10656;7529;57721;79577;6732;6429;7534;60677;5436;3181;6426;54623;55802;6829;27161;22849;2332;58517;6434;79869;4670;4904;6428;6830;10768;84991;8106;1655;1660;9810;55234;79811;123169;83759;9667;9733;27339;10181;10659;79066;54890;6625;25962;6432;23019;22938;56254…	ENSG00000003756;ENSG00000006712;ENSG00000020577;ENSG00000048740;ENSG00000049883;ENSG00000054118;ENSG00000055917;ENSG00000060138;ENSG00000065978;ENSG00000066044;ENSG00000070495;ENSG00000075856;ENSG00000075914;ENSG00000082898;ENSG00000083312;ENSG00000083896;ENSG00000088247;ENSG00000090060;ENSG00000090097;ENSG00000090905;ENSG00000091542;ENSG00000096063;ENSG00000099783;ENSG00000100201;ENSG00000100320…
GO:0009141	nucleoside triphosphate metabolic process	0.324137	2.15337	0	0.00525437	253	112	4976;2631;29789;4705;142;4711;29103;4720;518;509;6391;4697;506;515;4722;10243;4725;4519;4716;481;11319;4729;65220;6834;4723;1503;9567;4719;201163;4700;9551;498;8604;10229;7384;5562;56474;10924;10059;5901;4701;51727;4536;4967;4713;93974;204;4436;6392;51562;5213;10476;4717;7385;7415;9377;10891;4540;526;55967;1347;7167;4710;5315;4709;2026;3091;4696;4698;790;523;30968;4338;4724;27109;4204;65018;230;1…	ENSG00000004455;ENSG00000004779;ENSG00000008130;ENSG00000010256;ENSG00000023228;ENSG00000028839;ENSG00000047230;ENSG00000065518;ENSG00000067225;ENSG00000078237;ENSG00000079739;ENSG00000084774;ENSG00000087470;ENSG00000088682;ENSG00000095002;ENSG00000099624;ENSG00000099795;ENSG00000100226;ENSG00000100644;ENSG00000102125;ENSG00000102144;ENSG00000105953;ENSG00000109107;ENSG00000109390;ENSG00000109819…
GO:0009123	nucleoside monophosphate metabolic process	0.32216	2.13764	0	0.00571656	263	122	2631;29789;4705;142;3251;4711;29103;4720;1740;518;159;509;6391;4697;506;515;4722;4725;4519;4716;158;481;11319;4729;65220;6834;4723;4719;201163;4700;9551;498;8604;10229;7384;5562;53343;10059;4701;51727;4536;4967;4713;93974;204;4436;6392;22978;5213;10476;4717;7385;7415;9377;10891;4540;526;55967;1347;7167;151531;4710;5315;4709;2026;3091;4696;4698;790;10606;523;30968;55312;4724;27109;4204;65018;230;1…	ENSG00000004455;ENSG00000004779;ENSG00000007001;ENSG00000008130;ENSG00000010256;ENSG00000023228;ENSG00000035687;ENSG00000065518;ENSG00000067225;ENSG00000076685;ENSG00000078237;ENSG00000079739;ENSG00000081026;ENSG00000084774;ENSG00000087470;ENSG00000088682;ENSG00000095002;ENSG00000099624;ENSG00000099795;ENSG00000100644;ENSG00000101911;ENSG00000102125;ENSG00000102144;ENSG00000105953;ENSG00000109107…
GO:0016999	antibiotic metabolic process	0.390418	2.09479	0	0.007819	80	38	1737;255027;6390;55907;3421;3420;4190;6391;10007;50;2534;5162;25824;8803;4967;6392;3419;2271;81889;5160;10935;7755;55577;10020;7915;4191;65018;25902;2098;5879;8802;10873;48;231;11315;128;10013;6480	ENSG00000010810;ENSG00000014641;ENSG00000067829;ENSG00000073849;ENSG00000085662;ENSG00000091483;ENSG00000094631;ENSG00000100412;ENSG00000101365;ENSG00000105953;ENSG00000111726;ENSG00000112294;ENSG00000113552;ENSG00000116288;ENSG00000117118;ENSG00000120254;ENSG00000122386;ENSG00000122729;ENSG00000124357;ENSG00000126432;ENSG00000131828;ENSG00000136143;ENSG00000136238;ENSG00000139684;ENSG00000143252…
GO:0030856	regulation of epithelial cell differentiation	-0.37581	-2.15017	0	0.0154706	85	35	677;54206;6608;25937;54806;55273;10413;1903;55810;1027;55506;5469;6662;6093;6935;5613;4926;7716;8609;865;4659;29841;5727;406;9839;1499;3551;9475;9555;84162;6009;9817;4097;6431;9575	ENSG00000018408;ENSG00000058272;ENSG00000065970;ENSG00000067900;ENSG00000067955;ENSG00000079999;ENSG00000099284;ENSG00000104365;ENSG00000106615;ENSG00000111276;ENSG00000113648;ENSG00000116285;ENSG00000118263;ENSG00000124193;ENSG00000125398;ENSG00000125686;ENSG00000128602;ENSG00000133794;ENSG00000134317;ENSG00000134318;ENSG00000134852;ENSG00000135541;ENSG00000136451;ENSG00000137497;ENSG00000137693…
GO:0008213	protein alkylation	-0.356789	-2.19344	0	0.0172387	139	54	200424;6628;10196;4302;80204;6598;51451;26038;55011;54623;9869;54790;79723;1786;9070;6830;55471;29072;64754;10664;546;55251;22938;56254;283742;94104;80349;25940;1499;23463;55818;55904;55677;2935;58508;23411;6018;55870;23512;9555;54904;22823;4089;7403;3276;5929;80335;80854;7468;51111;3275;79813;64324;8473	ENSG00000003509;ENSG00000005483;ENSG00000006712;ENSG00000055609;ENSG00000085224;ENSG00000096717;ENSG00000099956;ENSG00000100603;ENSG00000102974;ENSG00000103342;ENSG00000104872;ENSG00000109111;ENSG00000109685;ENSG00000110066;ENSG00000113648;ENSG00000115548;ENSG00000116237;ENSG00000116254;ENSG00000116539;ENSG00000117000;ENSG00000117222;ENSG00000119812;ENSG00000125835;ENSG00000126457;ENSG00000129691…
GO:0009259	ribonucleotide metabolic process	0.274809	1.94029	0	0.0277314	403	167	1737;4976;2631;29789;4705;5538;142;3251;5165;4711;29103;115;4720;1740;518;159;509;6391;4697;2180;506;515;4722;10243;4725;9524;25874;4519;4716;158;481;11319;4729;65220;6834;4723;1503;9567;4719;2954;201163;4700;9551;5136;498;38;54928;5162;8604;10229;7384;5562;84320;84649;8050;56474;53343;8803;10059;5901;4701;51727;4536;4967;4713;93974;204;4436;6392;51562;22978;5213;10476;4717;7385;6785;7415;9377;10…	ENSG00000004455;ENSG00000004779;ENSG00000005469;ENSG00000007001;ENSG00000008130;ENSG00000010256;ENSG00000023228;ENSG00000035687;ENSG00000047230;ENSG00000061918;ENSG00000062282;ENSG00000064763;ENSG00000065518;ENSG00000067225;ENSG00000067992;ENSG00000069667;ENSG00000075239;ENSG00000076685;ENSG00000078237;ENSG00000079739;ENSG00000081026;ENSG00000084774;ENSG00000087470;ENSG00000088682;ENSG00000090857…
GO:0006397	mRNA processing	-0.277873	-2.05462	0	0.0278472	414	168	9092;4841;22916;51428;5411;57794;7884;10978;10907;8241;11189;9238;9716;9646;25980;246175;5432;5093;60680;29890;5434;4331;11129;26993;23398;284695;100534012;84950;79882;22913;10285;79810;6628;64895;9589;10656;55599;57721;56259;51692;51631;9785;79577;6732;6429;60677;1996;5436;3181;6426;54623;23524;6829;5511;1993;22849;2332;27238;58517;6434;55339;79869;4670;5356;4904;6428;6830;10768;7536;84991;79665…	ENSG00000003756;ENSG00000006712;ENSG00000007392;ENSG00000011243;ENSG00000020426;ENSG00000021776;ENSG00000033030;ENSG00000039123;ENSG00000048740;ENSG00000049883;ENSG00000054118;ENSG00000060339;ENSG00000065883;ENSG00000065978;ENSG00000066044;ENSG00000067596;ENSG00000068394;ENSG00000070047;ENSG00000074356;ENSG00000075856;ENSG00000083896;ENSG00000087087;ENSG00000087365;ENSG00000088247;ENSG00000090060…
GO:0006414	translational elongation	0.322801	1.92026	0.00181159	0.0281294	122	71	16;85476;3396;29904;60488;56648;9567;51069;55037;28998;7818;55052;11222;64969;64960;78988;10600;65003;740;54534;51263;51642;51258;54148;64949;6726;29088;54998;64978;51021;56945;5018;51714;7284;10240;10573;1917;10102;84545;64979;118672;51116;64976;51264;285381;54948;64965;51649;29074;124995;64975;10884;65008;118487;89978;28977;65080;60678;9801;54460;80325;51253;28957;51081;92259;128308;54952;51650…	ENSG00000055950;ENSG00000061794;ENSG00000086504;ENSG00000090263;ENSG00000090861;ENSG00000096080;ENSG00000100226;ENSG00000101210;ENSG00000102738;ENSG00000103319;ENSG00000108826;ENSG00000111639;ENSG00000112110;ENSG00000112651;ENSG00000112996;ENSG00000114626;ENSG00000114686;ENSG00000115364;ENSG00000116221;ENSG00000116898;ENSG00000122140;ENSG00000123297;ENSG00000125445;ENSG00000125901;ENSG00000132300…
GO:1902600	proton transmembrane transport	0.331941	1.92149	0	0.0301396	115	46	11261;51382;518;509;4697;506;515;4891;529;4519;1182;1340;6834;9551;498;1351;64924;1345;51606;10476;534;9377;526;84679;1347;9114;9550;523;30968;9016;27109;1337;400916;9296;528;1349;1327;9368;57282;57030;513;374291;23315;11315;476;522	ENSG00000047249;ENSG00000065923;ENSG00000099624;ENSG00000100554;ENSG00000102078;ENSG00000104888;ENSG00000109062;ENSG00000109572;ENSG00000110911;ENSG00000110955;ENSG00000111775;ENSG00000112695;ENSG00000114573;ENSG00000115286;ENSG00000116288;ENSG00000116459;ENSG00000125375;ENSG00000126267;ENSG00000128524;ENSG00000131100;ENSG00000131143;ENSG00000131174;ENSG00000136888;ENSG00000144290;ENSG00000145740…
GO:0006091	generation of precursor metabolites and energy	0.280298	1.9418	0	0.030468	366	131	1737;2631;6390;4705;4711;29103;87178;4720;3421;2932;5499;3420;4190;509;6391;4697;56181;2110;506;515;4722;622;4725;4519;4716;10007;158;11319;4729;1340;93058;50;6834;4723;4719;664;4700;9551;498;38;5162;8604;10229;7384;1351;5562;2931;8803;2475;444;4701;4536;4967;4713;93974;1345;4436;6392;5213;291;10476;4717;7385;3419;7415;2271;9377;10891;4540;81889;5160;55967;1347;7167;4710;5315;4709;2026;51763;3091…	ENSG00000010256;ENSG00000014641;ENSG00000023228;ENSG00000044446;ENSG00000065518;ENSG00000065615;ENSG00000066926;ENSG00000067225;ENSG00000067829;ENSG00000075239;ENSG00000079739;ENSG00000082701;ENSG00000085662;ENSG00000091483;ENSG00000095002;ENSG00000099624;ENSG00000099795;ENSG00000100412;ENSG00000100644;ENSG00000101365;ENSG00000102078;ENSG00000104687;ENSG00000105723;ENSG00000105953;ENSG00000108010…
GO:0050690	regulation of defense response to virus by virus	0.484573	1.89974	0.00793651	0.0310762	23	13	162;164;1175;375;2534;51606;1173;23513;8905;5879;1174;160;55690	ENSG00000010810;ENSG00000042753;ENSG00000047249;ENSG00000100280;ENSG00000106367;ENSG00000136238;ENSG00000143761;ENSG00000161203;ENSG00000166747;ENSG00000175115;ENSG00000180900;ENSG00000182287;ENSG00000196961
GO:0016458	gene silencing	-0.327352	-2.05592	0	0.0348089	155	79	3070;8994;53615;5936;55051;8085;7290;9757;5433;8289;1956;10943;8520;29102;9643;84872;4849;10847;8493;8726;8087;22916;10269;10978;55183;246175;5432;5434;90459;23405;5436;8467;27044;3181;5511;27161;2332;192670;9869;1786;79753;57472;192669;4152;3066;79670;11022;1655;1660;23264;6774;9611;103;23304;25904;23019;26058;1994;4848;23347;9337;56339;10658;10014;23318;57708;23411;9931;22955;54454;51593;9555;2…	ENSG00000005302;ENSG00000010803;ENSG00000024048;ENSG00000055917;ENSG00000066044;ENSG00000071655;ENSG00000074266;ENSG00000080345;ENSG00000080603;ENSG00000083223;ENSG00000084073;ENSG00000087087;ENSG00000088038;ENSG00000090905;ENSG00000096717;ENSG00000099817;ENSG00000100084;ENSG00000100201;ENSG00000100354;ENSG00000100403;ENSG00000100697;ENSG00000101596;ENSG00000102081;ENSG00000102978;ENSG00000104626…
GO:0071985	multivesicular body sorting pathway	0.458687	1.87303	0.00390625	0.0373307	28	15	137492;7405;9525;55353;7415;51028;6272;757;5874;57132;155382;5119;1130;51534;23484	ENSG00000009844;ENSG00000041353;ENSG00000104341;ENSG00000104660;ENSG00000119541;ENSG00000131165;ENSG00000134243;ENSG00000136100;ENSG00000142188;ENSG00000143669;ENSG00000155975;ENSG00000165280;ENSG00000176428;ENSG00000198382;ENSG00000255112
GO:0009112	nucleobase metabolic process	0.44917	1.85024	0.00742115	0.039651	28	14	5594;23028;3251;1503;56474;9615;2475;51727;2766;790;10606;25902;5471;4329	ENSG00000004487;ENSG00000047230;ENSG00000084774;ENSG00000100030;ENSG00000119125;ENSG00000119711;ENSG00000120254;ENSG00000128050;ENSG00000128059;ENSG00000137198;ENSG00000162368;ENSG00000165704;ENSG00000171793;ENSG00000198793
GO:0072512	trivalent inorganic cation transport	0.43264	1.85564	0.00366972	0.0406588	30	14	51382;529;1213;51606;534;526;9114;9550;523;9230;7037;9296;528;57192	ENSG00000047249;ENSG00000072274;ENSG00000090674;ENSG00000100554;ENSG00000114573;ENSG00000128524;ENSG00000131100;ENSG00000136888;ENSG00000141367;ENSG00000147416;ENSG00000155097;ENSG00000159720;ENSG00000185236;ENSG00000213760
GO:0006399	tRNA metabolic process	0.291953	1.82543	0	0.0461582	169	90	2617;8518;142940;54888;16;9330;92675;55699;81627;5917;55140;64172;27068;2926;54517;5859;5464;9521;4677;51520;55226;833;112487;51493;5393;57038;3376;7453;55250;79042;123263;8270;123283;9329;55687;6301;60528;6741;9097;5188;3035;1653;3735;2193;84705;112495;118672;51637;54522;285381;10056;150962;4141;9255;55621;2976;116461;90353;57176;10352;25973;51367;2975;81605;81890;55520;7407;55157;158234;6894;57…	ENSG00000006744;ENSG00000031698;ENSG00000037474;ENSG00000059588;ENSG00000059691;ENSG00000065427;ENSG00000066651;ENSG00000067704;ENSG00000070061;ENSG00000077235;ENSG00000079785;ENSG00000087302;ENSG00000090861;ENSG00000091127;ENSG00000100220;ENSG00000100416;ENSG00000101557;ENSG00000103707;ENSG00000104356;ENSG00000104835;ENSG00000104907;ENSG00000105171;ENSG00000106105;ENSG00000110619;ENSG00000113272…
GO:0008380	RNA splicing	-0.271567	-1.96353	0	0.0539262	357	141	9092;4841;22916;51428;5411;57794;10978;10907;8241;11189;9716;25980;5432;5093;60680;29890;5434;11129;26993;23398;284695;100534012;84950;22913;10285;6628;9589;10656;1195;55599;57721;56259;51692;51631;9785;6732;6429;60677;5436;3181;6426;23524;5511;10199;1993;2332;27238;58517;6434;55339;79869;4670;5356;4904;6428;6830;7536;84991;79665;9129;5094;8106;1655;1660;10286;55234;10625;83759;9733;27339;10181;1…	ENSG00000003756;ENSG00000007392;ENSG00000011243;ENSG00000013441;ENSG00000021776;ENSG00000033030;ENSG00000039123;ENSG00000048740;ENSG00000054118;ENSG00000060339;ENSG00000065883;ENSG00000065978;ENSG00000066044;ENSG00000067596;ENSG00000068394;ENSG00000075292;ENSG00000075856;ENSG00000083896;ENSG00000087087;ENSG00000087365;ENSG00000088247;ENSG00000090060;ENSG00000096063;ENSG00000096746;ENSG00000099783…
GO:0006970	response to osmotic stress	0.361148	1.77673	0.0038835	0.058305	54	28	6326;2185;7520;51719;9181;4519;55144;9990;51562;27347;1386;9819;9221;310;3778;1831;231;5609;7098;5585;57468;1654;825;79752;572;836;2547;6513	ENSG00000002330;ENSG00000076984;ENSG00000079246;ENSG00000085662;ENSG00000092529;ENSG00000104231;ENSG00000115966;ENSG00000116584;ENSG00000117394;ENSG00000120899;ENSG00000123143;ENSG00000124140;ENSG00000135932;ENSG00000136531;ENSG00000138279;ENSG00000140199;ENSG00000151332;ENSG00000156113;ENSG00000157514;ENSG00000164305;ENSG00000164342;ENSG00000166197;ENSG00000171492;ENSG00000196419;ENSG00000196428…
GO:0006839	mitochondrial transport	0.278013	1.78821	0	0.0589399	202	55	4976;9868;255027;6687;10469;9927;4285;29103;55823;9804;26128;87178;56947;23203;2932;5599;10651;8034;55486;509;506;515;25874;63933;664;9551;498;8604;5562;26520;3954;2931;56993;118424;7533;93974;10476;7385;57380;55750;134266;7029;10953;7755;55737;1386;10425;30968;5663;9016;65018;23368;292;80273;400916	ENSG00000005022;ENSG00000006530;ENSG00000025772;ENSG00000027001;ENSG00000050393;ENSG00000069329;ENSG00000080815;ENSG00000082701;ENSG00000088808;ENSG00000100216;ENSG00000100575;ENSG00000102078;ENSG00000104980;ENSG00000105723;ENSG00000107643;ENSG00000109519;ENSG00000110955;ENSG00000114126;ENSG00000115840;ENSG00000115966;ENSG00000116459;ENSG00000116688;ENSG00000120675;ENSG00000122386;ENSG00000122912…
GO:0007006	mitochondrial membrane organization	0.310951	1.78003	0.00180505	0.059963	107	33	4976;255027;6687;9927;9804;10989;55735;2932;5599;518;509;506;515;664;9551;498;26520;3954;2931;56993;7533;93974;10476;55750;7029;79135;7755;1386;27109;65018;23368;292;400916	ENSG00000005022;ENSG00000006530;ENSG00000007923;ENSG00000082701;ENSG00000088808;ENSG00000100216;ENSG00000100575;ENSG00000105723;ENSG00000107643;ENSG00000110955;ENSG00000114126;ENSG00000115966;ENSG00000116459;ENSG00000116688;ENSG00000122386;ENSG00000125375;ENSG00000128245;ENSG00000130770;ENSG00000132305;ENSG00000152234;ENSG00000154518;ENSG00000156968;ENSG00000158828;ENSG00000165629;ENSG00000167863…
GO:0031122	cytoplasmic microtubule organization	-0.390798	-1.93895	0.00209205	0.0615668	48	20	1739;667;9748;8766;5108;4926;1855;10426;1778;5048;79187;157922;55704;6683;26160;51361;84056;3837;4137;84376	ENSG00000007168;ENSG00000021574;ENSG00000065613;ENSG00000075711;ENSG00000078674;ENSG00000102781;ENSG00000103769;ENSG00000105255;ENSG00000107404;ENSG00000108424;ENSG00000115355;ENSG00000126216;ENSG00000130559;ENSG00000134709;ENSG00000137497;ENSG00000138002;ENSG00000151914;ENSG00000168172;ENSG00000186868;ENSG00000197102
GO:0032984	protein-containing complex disassembly	0.256691	1.75204	0	0.0669567	277	116	4905;1072;6601;2580;119;167410;27183;2932;5499;136319;11345;63908;10300;3831;3396;7405;50810;60488;9181;63894;118;29979;56648;23271;664;9829;51069;830;28985;55037;8775;23710;444;57724;28998;9525;7818;55052;55014;23332;11222;9798;64969;64960;7415;78988;6059;7251;65003;740;23557;54534;146057;88;51263;2059;8562;51642;5756;51258;54148;84557;64949;126731;29088;54998;57132;64978;51021;400916;1073;324;6…	ENSG00000009844;ENSG00000034713;ENSG00000055950;ENSG00000061794;ENSG00000066117;ENSG00000067798;ENSG00000073969;ENSG00000074054;ENSG00000074319;ENSG00000075340;ENSG00000077522;ENSG00000082701;ENSG00000083937;ENSG00000086504;ENSG00000087274;ENSG00000090674;ENSG00000094631;ENSG00000101460;ENSG00000102738;ENSG00000105402;ENSG00000105887;ENSG00000108604;ENSG00000108826;ENSG00000111639;ENSG00000112110…
GO:0070972	protein localization to endoplasmic reticulum	0.302685	1.74238	0	0.0698845	105	66	6731;10956;81573;57142;54557;439;128866;9218;6124;202018;6224;375056;10890;11231;4736;6138;6158;2901;337867;6128;6230;28972;6726;6727;6734;6449;25782;11079;6136;10134;6142;6231;8729;6187;6208;7095;6146;9789;6218;8733;6122;6209;23480;6223;6217;9045;6169;6164;10945;6135;6210;6191;6161;65992;6234;6201;6130;9349;6129;6157;6154;6155;6194;6189;6207;6143	ENSG00000008952;ENSG00000008988;ENSG00000025796;ENSG00000084733;ENSG00000089009;ENSG00000100316;ENSG00000101421;ENSG00000101558;ENSG00000104969;ENSG00000105193;ENSG00000105372;ENSG00000105438;ENSG00000105640;ENSG00000105737;ENSG00000107862;ENSG00000108107;ENSG00000108298;ENSG00000109475;ENSG00000110700;ENSG00000114902;ENSG00000115268;ENSG00000115310;ENSG00000116251;ENSG00000118181;ENSG00000118363…
GO:0043631	RNA polyadenylation	-0.401231	-1.90823	0.00224215	0.072933	44	27	167153;29894;22916;10978;9646;79882;64895;51692;79577;54623;6829;22849;55339;79869;10768;9810;29101;64852;123169;25962;56254;51585;11052;1025;351;10914;904	ENSG00000006712;ENSG00000071894;ENSG00000090060;ENSG00000100722;ENSG00000103549;ENSG00000107864;ENSG00000111605;ENSG00000114503;ENSG00000115421;ENSG00000119203;ENSG00000129315;ENSG00000134371;ENSG00000136709;ENSG00000136807;ENSG00000142192;ENSG00000149016;ENSG00000149532;ENSG00000155827;ENSG00000160075;ENSG00000164329;ENSG00000164944;ENSG00000165494;ENSG00000166477;ENSG00000168710;ENSG00000172409…
GO:0052192	movement in environment of other organism involved in symbiotic interaction	0.416953	1.71322	0.011976	0.0831278	28	10	23087;27183;22954;11043;128866;9218;9525;9798;7251;10155	ENSG00000074319;ENSG00000080561;ENSG00000101421;ENSG00000101558;ENSG00000104228;ENSG00000119401;ENSG00000119541;ENSG00000130726;ENSG00000132612;ENSG00000182149
GO:0071514	genetic imprinting	0.467843	1.7058	0.0209924	0.0843364	18	10	84333;51507;51742;10155;10336;4204;221656;5926;84108;54496	ENSG00000022277;ENSG00000032219;ENSG00000054267;ENSG00000130726;ENSG00000132600;ENSG00000156374;ENSG00000165097;ENSG00000169057;ENSG00000180628;ENSG00000185619
GO:0010608	posttranscriptional regulation of gene expression	-0.256296	-1.87841	0	0.0863409	400	153	11340;84872;3842;8313;4849;65981;55024;57060;8892;11236;1613;22863;167153;10985;55795;8087;2915;22916;10269;10978;8241;9669;9238;54464;246175;5432;23404;5434;23016;79882;9451;132864;51247;23107;7529;57721;23405;120526;7534;26164;5436;22868;3181;55802;5511;8846;27161;22849;400961;2332;192670;8664;55245;10131;4670;9470;54915;4904;6197;79753;57472;192669;54505;8662;3488;9887;55239;84541;79670;317649…	ENSG00000015479;ENSG00000020577;ENSG00000047410;ENSG00000054118;ENSG00000055917;ENSG00000056586;ENSG00000060138;ENSG00000065978;ENSG00000066044;ENSG00000067248;ENSG00000067560;ENSG00000070366;ENSG00000075914;ENSG00000082898;ENSG00000083223;ENSG00000083312;ENSG00000083896;ENSG00000084073;ENSG00000087087;ENSG00000087263;ENSG00000088038;ENSG00000088247;ENSG00000089154;ENSG00000090097;ENSG00000090905…
GO:0010927	cellular component assembly involved in morphogenesis	-0.348064	-1.86451	0.00207039	0.0884479	74	26	5156;71;4628;9896;10529;23405;8837;64398;7168;26011;3267;3688;6722;2817;11214;29766;5573;5048;9948;200576;4205;23122;4089;287;8443;29767	ENSG00000003402;ENSG00000007168;ENSG00000063660;ENSG00000068305;ENSG00000071127;ENSG00000072415;ENSG00000078114;ENSG00000100697;ENSG00000108946;ENSG00000112367;ENSG00000112658;ENSG00000115020;ENSG00000116906;ENSG00000128872;ENSG00000133026;ENSG00000134853;ENSG00000138594;ENSG00000140416;ENSG00000141646;ENSG00000145362;ENSG00000149256;ENSG00000150093;ENSG00000163539;ENSG00000170776;ENSG00000173744…
GO:0035329	hippo signaling	-0.397318	-1.77589	0.00411523	0.092754	35	18	154796;7531;8994;80014;25937;9231;10413;55233;7529;6664;60485;4771;9867;1856;6788;7082;154810;6789	ENSG00000004975;ENSG00000018408;ENSG00000101109;ENSG00000104067;ENSG00000104375;ENSG00000108953;ENSG00000114978;ENSG00000126016;ENSG00000137693;ENSG00000144791;ENSG00000151208;ENSG00000151718;ENSG00000151748;ENSG00000166025;ENSG00000166913;ENSG00000176887;ENSG00000186575;ENSG00000198961
GO:0044321	response to leptin	-0.50056	-1.78097	0.0126582	0.0938552	16	6	6770;6774;8195;585;23411;51094	ENSG00000096717;ENSG00000125863;ENSG00000140463;ENSG00000147465;ENSG00000159346;ENSG00000168610
GO:0040029	regulation of gene expression, epigenetic	-0.270971	-1.80662	0	0.0969914	206	93	3070;8994;53615;5936;55051;8085;7290;9757;5433;57492;8289;1956;10943;11146;5976;8520;29102;9425;9643;84872;8493;3720;8726;9759;8087;55974;10269;10978;6908;55183;84337;55506;5432;29890;5434;23405;58487;5436;8467;3181;5511;27161;2332;192670;9869;1786;55791;79753;57472;192669;4152;3066;79670;1655;1660;10664;23264;2033;6774;9611;103;23304;23019;26058;1994;23347;9337;1499;56339;10658;10014;23318;57708…	ENSG00000005007;ENSG00000005302;ENSG00000008083;ENSG00000009954;ENSG00000024048;ENSG00000049618;ENSG00000055917;ENSG00000066044;ENSG00000068024;ENSG00000071655;ENSG00000074266;ENSG00000080345;ENSG00000083223;ENSG00000083896;ENSG00000084073;ENSG00000087087;ENSG00000090905;ENSG00000096717;ENSG00000099284;ENSG00000099817;ENSG00000100084;ENSG00000100354;ENSG00000100393;ENSG00000100403;ENSG00000100697…
GO:0042219	cellular modified amino acid catabolic process	0.479849	1.68128	0.023166	0.0971207	17	3	26090;2806;51449	ENSG00000100997;ENSG00000116005;ENSG00000125166
GO:0098727	maintenance of cell number	-0.301817	-1.79937	0	0.097244	116	47	8289;6608;6760;8243;4849;22882;283149;2176;3815;1000;10413;55183;9646;9126;7476;57721;79577;84678;6662;51586;54623;79576;60485;5108;25836;657;123169;9079;6774;23091;23019;1994;9412;4848;1499;51123;55818;56339;23318;5894;79692;51593;22823;4089;5087;1656;84376	ENSG00000006712;ENSG00000066044;ENSG00000072501;ENSG00000078674;ENSG00000080345;ENSG00000087087;ENSG00000088038;ENSG00000089094;ENSG00000099917;ENSG00000101882;ENSG00000107779;ENSG00000108055;ENSG00000110367;ENSG00000111596;ENSG00000115548;ENSG00000117713;ENSG00000120963;ENSG00000123200;ENSG00000125107;ENSG00000125398;ENSG00000128602;ENSG00000132155;ENSG00000134371;ENSG00000134744;ENSG00000137693…
GO:0032259	methylation	-0.258704	-1.78399	0	0.097504	266	84	55183;9646;130916;29890;63892;25821;200424;91801;6628;10196;4302;9589;131965;57721;80204;6598;1787;51451;26038;55011;54623;9869;4552;54790;79723;1786;9070;6830;27292;54737;55471;11022;29072;64754;10664;51093;79066;546;55251;23091;57019;25962;5290;22938;56254;56980;283742;94104;80349;25940;1499;23463;55818;56339;55904;55677;2935;58508;55729;23411;96764;6018;25917;55870;23512;9555;154743;4548;10436…	ENSG00000003509;ENSG00000005194;ENSG00000005483;ENSG00000006712;ENSG00000055609;ENSG00000080345;ENSG00000085224;ENSG00000086189;ENSG00000096717;ENSG00000099956;ENSG00000100603;ENSG00000102974;ENSG00000103342;ENSG00000104872;ENSG00000107614;ENSG00000109111;ENSG00000109685;ENSG00000110066;ENSG00000113648;ENSG00000115548;ENSG00000115970;ENSG00000116237;ENSG00000116254;ENSG00000116539;ENSG00000116984…
GO:0033044	regulation of chromosome organization	-0.265669	-1.81398	0	0.0982301	252	87	7013;54464;55183;9646;10576;6879;4331;6950;26993;7014;4302;6598;51451;55011;8536;11143;3181;54623;2332;9869;1786;84250;22948;6830;25836;246184;4926;8678;51143;23137;10270;9810;6622;10664;9733;908;23381;10575;23293;546;11011;7203;7175;5925;55209;8697;472;9183;22938;51366;56254;408;94104;80349;64682;167227;26036;1499;7756;55719;55818;10014;55904;55677;10694;57708;144108;9320;23411;54454;9555;10574;…	ENSG00000005483;ENSG00000006712;ENSG00000010244;ENSG00000011243;ENSG00000020426;ENSG00000047410;ENSG00000070366;ENSG00000073614;ENSG00000075856;ENSG00000080345;ENSG00000085224;ENSG00000086827;ENSG00000089053;ENSG00000094880;ENSG00000096717;ENSG00000099956;ENSG00000100603;ENSG00000102081;ENSG00000102974;ENSG00000103549;ENSG00000104517;ENSG00000104872;ENSG00000105127;ENSG00000107854;ENSG00000108840…
GO:0017156	calcium ion regulated exocytosis	0.278087	1.67333	0.00179211	0.0992783	130	36	80331;5532;5217;673;11261;2932;63908;5864;9699;116841;192683;375;22871;6616;9515;51150;9581;26059;8775;5868;10059;10675;23557;6857;321;23208;6861;2901;783;1141;5663;23513;8541;84258;10815;10814	ENSG00000034053;ENSG00000067715;ENSG00000070087;ENSG00000078808;ENSG00000080815;ENSG00000082701;ENSG00000087470;ENSG00000101152;ENSG00000105402;ENSG00000105649;ENSG00000105737;ENSG00000107758;ENSG00000114646;ENSG00000125814;ENSG00000129990;ENSG00000132639;ENSG00000132718;ENSG00000138078;ENSG00000143553;ENSG00000143740;ENSG00000143761;ENSG00000144566;ENSG00000145087;ENSG00000145920;ENSG00000157764…
GO:0006403	RNA localization	-0.263495	-1.75091	0	0.101727	201	75	7013;10576;23404;29890;6950;26993;7014;6396;51692;9785;6429;55011;3181;23165;6426;2332;55339;6428;22948;6830;9887;3267;79902;9793;29072;8106;8888;84271;51808;1660;9908;908;57122;23381;10575;23293;54890;7203;7175;23279;6432;10482;57097;472;5903;167227;10211;51068;25909;64062;636;55677;10694;2733;4928;5036;6311;55421;9818;8570;26019;10574;8559;11260;7919;11052;6421;9295;5813;7514;6431;3192;91746;23…	ENSG00000011243;ENSG00000030066;ENSG00000047410;ENSG00000070366;ENSG00000074356;ENSG00000082898;ENSG00000083896;ENSG00000088247;ENSG00000091542;ENSG00000100227;ENSG00000100836;ENSG00000102081;ENSG00000104872;ENSG00000109111;ENSG00000110713;ENSG00000111224;ENSG00000111581;ENSG00000111605;ENSG00000112081;ENSG00000115484;ENSG00000115875;ENSG00000116350;ENSG00000116560;ENSG00000116698;ENSG00000116754…
GO:0006925	inflammatory cell apoptotic process	-0.552902	-1.78475	0.021692	0.102769	12	8	4208;3707;3661;5291;10269;6950;55829;23411	ENSG00000051382;ENSG00000081189;ENSG00000084073;ENSG00000096717;ENSG00000120438;ENSG00000126456;ENSG00000131871;ENSG00000143772
GO:0016569	covalent chromatin modification	-0.252076	-1.81725	0	0.104095	384	110	79577;6598;84289;171023;26038;55011;5579;84678;8536;84864;11143;151050;56916;54623;57634;2332;9869;6877;54790;79723;1786;9070;6830;25836;79718;7994;4152;3066;29072;64754;10270;9810;51780;6622;79885;55689;123169;54556;10664;9733;1020;7786;2033;546;23304;55209;472;22938;51366;56254;4287;1107;408;94104;2005;80349;26036;1499;55818;10014;55904;55677;57708;9031;322;58508;9320;23411;1105;6018;5928;6314;…	ENSG00000005483;ENSG00000006712;ENSG00000009954;ENSG00000024048;ENSG00000048649;ENSG00000055483;ENSG00000055609;ENSG00000066427;ENSG00000071243;ENSG00000073614;ENSG00000075856;ENSG00000083168;ENSG00000085224;ENSG00000086758;ENSG00000089094;ENSG00000096717;ENSG00000096968;ENSG00000099956;ENSG00000100393;ENSG00000100603;ENSG00000102081;ENSG00000102974;ENSG00000103549;ENSG00000104517;ENSG00000104872…
GO:0006338	chromatin remodeling	-0.294647	-1.75332	0.00220751	0.104758	113	37	2186;6598;26038;55011;6662;56916;8467;6599;6605;79723;283899;6830;3066;57680;546;7175;5925;11164;29994;4678;473;55193;23347;6594;1499;10014;9031;144108;22955;1105;5928;54617;114803;7403;7150;6595;51773	ENSG00000009954;ENSG00000010803;ENSG00000047410;ENSG00000048649;ENSG00000073584;ENSG00000080503;ENSG00000085224;ENSG00000099956;ENSG00000100888;ENSG00000101596;ENSG00000102038;ENSG00000104872;ENSG00000108840;ENSG00000109111;ENSG00000116254;ENSG00000123636;ENSG00000125398;ENSG00000128908;ENSG00000132780;ENSG00000139687;ENSG00000142599;ENSG00000147050;ENSG00000152455;ENSG00000153147;ENSG00000153922…
GO:0008637	apoptotic mitochondrial changes	0.300396	1.66088	0.00571429	0.105143	91	26	4976;2729;255027;56947;2932;5599;25994;4719;664;2931;10059;2730;7533;93974;291;79017;7029;2066;7755;55737;1386;207;65018;23368;292;400916	ENSG00000001084;ENSG00000005022;ENSG00000006625;ENSG00000023228;ENSG00000023909;ENSG00000069329;ENSG00000082701;ENSG00000087470;ENSG00000088808;ENSG00000105723;ENSG00000107643;ENSG00000114126;ENSG00000115966;ENSG00000122386;ENSG00000128245;ENSG00000130770;ENSG00000142208;ENSG00000151729;ENSG00000156968;ENSG00000158828;ENSG00000168958;ENSG00000176171;ENSG00000178568;ENSG00000181061;ENSG00000198836…
GO:0018196	peptidyl-asparagine modification	-0.444046	-1.74066	0.00393701	0.106627	22	11	29880;1650;4249;6185;201595;58505;4245;2530;56886;6184;3703	ENSG00000033170;ENSG00000118705;ENSG00000120697;ENSG00000131446;ENSG00000134910;ENSG00000136731;ENSG00000152127;ENSG00000163527;ENSG00000163902;ENSG00000198856;ENSG00000244038
GO:0034248	regulation of cellular amide metabolic process	-0.255192	-1.8196	0	0.111148	321	91	8846;27161;22849;400961;2332;6093;192670;8664;55245;10131;9470;54915;6197;57472;192669;54505;8662;3488;55239;84541;317649;84271;1660;6622;23173;23521;6653;83759;90850;208;80315;8872;6198;1938;127933;79066;6774;6625;3658;274;7175;55364;25904;8301;23019;149986;26058;1994;8439;4848;10492;3609;2058;9337;51123;56339;10658;23034;7458;2733;5036;387;6311;55005;51091;9475;8507;5163;8570;8531;253943;26046;…	ENSG00000020577;ENSG00000035681;ENSG00000047410;ENSG00000055917;ENSG00000060138;ENSG00000066044;ENSG00000067248;ENSG00000067560;ENSG00000067900;ENSG00000073921;ENSG00000087263;ENSG00000088247;ENSG00000090905;ENSG00000100227;ENSG00000100353;ENSG00000100354;ENSG00000100601;ENSG00000101019;ENSG00000101489;ENSG00000102081;ENSG00000102580;ENSG00000104824;ENSG00000104852;ENSG00000105221;ENSG00000106263…
GO:0023058	adaptation of signaling pathway	-0.49522	-1.71735	0.0228216	0.112609	15	7	1759;1785;51109;3351;409;156;408	ENSG00000072042;ENSG00000079805;ENSG00000106976;ENSG00000135312;ENSG00000137486;ENSG00000141480;ENSG00000173020
GO:0071826	ribonucleoprotein complex subunit organization	-0.25725	-1.72046	0	0.114427	214	78	10978;10907;11189;130916;25980;246175;84340;60680;27341;6628;23405;51631;79577;6732;55011;84231;60677;3326;3320;22868;1939;6426;27161;192670;8664;203228;79869;57472;192669;8662;55239;7536;9129;29997;1660;23521;9908;1778;9733;27339;10181;56342;10659;10146;103;472;23019;79631;4848;9169;51747;8661;10594;636;10658;55692;9416;1659;7458;6311;7375;96764;23195;8559;7919;10421;11052;11168;56853;26065;1490…	ENSG00000003756;ENSG00000007392;ENSG00000048740;ENSG00000055917;ENSG00000067596;ENSG00000075856;ENSG00000080824;ENSG00000083896;ENSG00000087263;ENSG00000096063;ENSG00000096384;ENSG00000100353;ENSG00000100697;ENSG00000101489;ENSG00000104872;ENSG00000105373;ENSG00000106263;ENSG00000106682;ENSG00000107290;ENSG00000107581;ENSG00000108848;ENSG00000110107;ENSG00000110367;ENSG00000111596;ENSG00000111605…
GO:0006457	protein folding	-0.268793	-1.72442	0	0.116232	173	61	10808;6950;2288;5082;2923;957;120526;10294;6102;3326;3320;3309;10845;79139;7841;10131;23184;30001;22948;573;908;11140;10575;51182;3998;6625;7203;9601;10130;5903;11328;11080;2783;821;9360;9049;10694;2782;8195;23759;26973;51430;6782;55898;4820;267;22824;5034;10574;56886;59345;2773;64215;811;51726;9761;7266;5611;6767;10961;7184	ENSG00000004478;ENSG00000044574;ENSG00000065135;ENSG00000069345;ENSG00000074695;ENSG00000078369;ENSG00000080824;ENSG00000089248;ENSG00000090520;ENSG00000094975;ENSG00000096384;ENSG00000100023;ENSG00000100380;ENSG00000102218;ENSG00000102580;ENSG00000104852;ENSG00000105401;ENSG00000107262;ENSG00000110172;ENSG00000110711;ENSG00000110917;ENSG00000114450;ENSG00000114857;ENSG00000115275;ENSG00000115484…
GO:0034330	cell junction organization	-0.252833	-1.69303	0	0.120955	228	106	389;3911;100506658;91663;10580;857;4323;1007;5339;57669;2316;1003;57493;23396;4641;22998;9448;10052;7094;81;84552;6385;2042;57555;23114;1436;5906;25930;3801;9270;2039;9922;7010;51057;1946;8502;4092;6624;5800;1008;5962;1613;9231;71;25;1000;10395;7422;3791;1500;342184;1501;596;6281;7043;64398;1739;3915;667;9748;23603;51762;6093;4867;4771;402;10982;1495;56940;9693;8826;87;55920;9253;5796;6722;6801;8…	ENSG00000040731;ENSG00000044115;ENSG00000044524;ENSG00000064042;ENSG00000065243;ENSG00000065613;ENSG00000066933;ENSG00000067560;ENSG00000067900;ENSG00000067955;ENSG00000071054;ENSG00000071127;ENSG00000072110;ENSG00000072415;ENSG00000073712;ENSG00000075618;ENSG00000075711;ENSG00000076201;ENSG00000085733;ENSG00000095637;ENSG00000097007;ENSG00000101665;ENSG00000102606;ENSG00000104067;ENSG00000104365…
GO:0031365	N-terminal protein amino acid modification	-0.398814	-1.68723	0.00793651	0.121723	25	9	23173;9397;10988;2033;79612;80155;122830;60560;4836	ENSG00000100393;ENSG00000111142;ENSG00000135040;ENSG00000136448;ENSG00000139977;ENSG00000152465;ENSG00000164024;ENSG00000164134;ENSG00000172766
GO:0007369	gastrulation	-0.284935	-1.69734	0.00213675	0.122243	119	70	2719;7474;1303;3909;8013;2138;9314;6657;6886;2335;2260;90102;7048;1290;91663;1954;4323;1284;8646;23135;4041;57669;4324;79971;1295;3690;27031;154796;25949;3624;2132;7290;8516;3693;8289;3912;57045;65125;56983;9646;7358;79577;659;54623;26011;4771;92;7296;29072;1855;657;1738;10818;1856;3688;123169;6722;60626;2821;23275;5573;1499;60412;8195;23122;4089;7403;55578;10399;4040	ENSG00000004975;ENSG00000006712;ENSG00000053747;ENSG00000060237;ENSG00000070018;ENSG00000077782;ENSG00000077943;ENSG00000082781;ENSG00000090539;ENSG00000091136;ENSG00000091140;ENSG00000100084;ENSG00000102710;ENSG00000102996;ENSG00000104313;ENSG00000105220;ENSG00000105429;ENSG00000107404;ENSG00000107779;ENSG00000108946;ENSG00000109814;ENSG00000111799;ENSG00000112658;ENSG00000113971;ENSG00000114251…
GO:0031050	dsRNA processing	-0.361034	-1.70125	0.00639659	0.123935	42	17	23405;3181;5511;27161;192670;79753;192669;79670;1655;23264;9611;103;56339;23318;51593;54487;23369	ENSG00000055917;ENSG00000083223;ENSG00000087087;ENSG00000100403;ENSG00000100697;ENSG00000108654;ENSG00000117751;ENSG00000122566;ENSG00000123908;ENSG00000126070;ENSG00000128191;ENSG00000134698;ENSG00000134744;ENSG00000141027;ENSG00000160710;ENSG00000163877;ENSG00000165819
GO:0009299	mRNA transcription	-0.450431	-1.67793	0.0234043	0.12571	19	8	5469;6830;1655;6722;6774;405;468;10114	ENSG00000108654;ENSG00000109111;ENSG00000110422;ENSG00000112658;ENSG00000125686;ENSG00000128272;ENSG00000143437;ENSG00000168610
GO:0015698	inorganic anion transport	0.281123	1.62577	0.00359066	0.131629	110	30	2561;51449;6505;2743;2566;439;7417;2554;56172;1182;7416;9498;55144;2562;2475;2557;9990;51447;9213;23507;1207;9016;7419;1181;2560;57282;57030;5621;1408;8671	ENSG00000022355;ENSG00000050438;ENSG00000068745;ENSG00000074201;ENSG00000078668;ENSG00000080493;ENSG00000102078;ENSG00000104888;ENSG00000106688;ENSG00000109158;ENSG00000109572;ENSG00000109738;ENSG00000113327;ENSG00000114859;ENSG00000116005;ENSG00000121671;ENSG00000140199;ENSG00000143324;ENSG00000144290;ENSG00000145864;ENSG00000154122;ENSG00000163288;ENSG00000165637;ENSG00000166206;ENSG00000171492…
GO:0007214	gamma-aminobutyric acid signaling pathway	0.435664	1.61415	0.0191939	0.138005	20	8	2550;2561;2566;2554;2562;2557;2560;23228	ENSG00000022355;ENSG00000109158;ENSG00000113327;ENSG00000145864;ENSG00000154822;ENSG00000163288;ENSG00000166206;ENSG00000204681
GO:0031647	regulation of protein stability	-0.244523	-1.65771	0	0.139877	225	63	10273;3326;3320;79594;483;3845;79139;60485;55230;4771;22948;5591;29761;4194;23515;4047;1855;10869;29997;6622;7494;22848;3920;908;11140;8805;5190;2033;10575;284996;7203;7175;6788;57805;23673;64844;10211;7756;79612;3064;55602;10694;26224;9736;23411;80155;7375;252983;54765;10574;4193;83548;7320;1385;51100;287;811;57602;55031;6789;6400;5295;23032	ENSG00000005812;ENSG00000005893;ENSG00000010244;ENSG00000047410;ENSG00000055483;ENSG00000069849;ENSG00000071537;ENSG00000077254;ENSG00000080824;ENSG00000085982;ENSG00000090432;ENSG00000096384;ENSG00000096717;ENSG00000097033;ENSG00000100219;ENSG00000100393;ENSG00000101109;ENSG00000103266;ENSG00000104375;ENSG00000105373;ENSG00000105401;ENSG00000107404;ENSG00000114316;ENSG00000115464;ENSG00000115484…
GO:0097242	amyloid-beta clearance	-0.480283	-1.64781	0.0270833	0.145244	14	9	348;1191;3480;4035;6093;6722;3643;8301;4043	ENSG00000067900;ENSG00000073921;ENSG00000112658;ENSG00000120885;ENSG00000123384;ENSG00000130203;ENSG00000140443;ENSG00000163956;ENSG00000171105
GO:0016482	cytosolic transport	-0.26225	-1.64126	0	0.147634	142	53	30845;54732;2013;9367;9559;23011;23317;64145;55275;1639;55297;7109;80128;58533;23095;9179;7813;51209;143187;8678;9779;6653;6836;57533;8411;25963;23033;3998;51479;23258;64400;51542;26000;10652;23230;55638;4133;84910;51361;23085;200576;64089;54832;55773;23041;54497;9043;84067;6811;8675;10097;51552;84376	ENSG00000008294;ENSG00000008869;ENSG00000013016;ENSG00000036054;ENSG00000051009;ENSG00000054523;ENSG00000061987;ENSG00000067208;ENSG00000074695;ENSG00000078018;ENSG00000080371;ENSG00000082805;ENSG00000083097;ENSG00000102189;ENSG00000103978;ENSG00000104497;ENSG00000106636;ENSG00000115020;ENSG00000119396;ENSG00000122958;ENSG00000123106;ENSG00000123570;ENSG00000123595;ENSG00000124222;ENSG00000126581…
GO:0070584	mitochondrion morphogenesis	0.435917	1.59942	0.02693	0.147666	19	6	4976;87178;56947;26073;10087;10059	ENSG00000004142;ENSG00000087470;ENSG00000113163;ENSG00000138035;ENSG00000168958;ENSG00000198836
GO:0051648	vesicle localization	0.232626	1.57989	0	0.149449	272	75	80331;22920;55717;4905;64149;5217;3800;673;2932;63908;27095;10540;5864;9699;116841;8452;122553;375;1780;11196;22871;1453;6616;11127;9515;54413;1861;9581;51693;83696;26059;8775;5590;4644;9570;5868;26985;10059;5537;81876;66008;23332;10342;10675;23557;9371;55291;6857;1176;321;23208;6861;2901;23256;783;84984;9230;1141;5663;23513;8541;9024;5874;29058;357;84258;65018;63915;9527;23285;10815;55435;10814;…	ENSG00000034053;ENSG00000036257;ENSG00000041353;ENSG00000054116;ENSG00000067606;ENSG00000067715;ENSG00000070087;ENSG00000073969;ENSG00000074054;ENSG00000075945;ENSG00000080815;ENSG00000082701;ENSG00000087470;ENSG00000089063;ENSG00000092108;ENSG00000100528;ENSG00000101152;ENSG00000101350;ENSG00000105402;ENSG00000105649;ENSG00000105737;ENSG00000107651;ENSG00000108433;ENSG00000108587;ENSG00000108666…
GO:0010498	proteasomal protein catabolic process	0.22293	1.57579	0	0.149968	395	148	5601;25852;5887;2729;54431;8451;9373;10769;10956;5708;9870;23291;54926;51465;2932;54557;11345;26268;5527;7844;7993;7326;130507;11253;23197;5710;84861;8452;6047;7874;8454;8554;29979;1453;10296;10197;10612;55666;80267;7329;80011;29945;5688;10616;9604;9184;1861;5684;2931;57520;51283;51322;118424;200933;11124;5690;5886;54461;91445;8945;7353;10193;93611;996;54476;5566;7415;5700;5683;84937;81858;51185;…	ENSG00000001084;ENSG00000004897;ENSG00000006025;ENSG00000008018;ENSG00000011275;ENSG00000013374;ENSG00000013561;ENSG00000033800;ENSG00000034713;ENSG00000036257;ENSG00000041357;ENSG00000049167;ENSG00000049759;ENSG00000050748;ENSG00000051108;ENSG00000053900;ENSG00000055130;ENSG00000058056;ENSG00000063978;ENSG00000068878;ENSG00000070010;ENSG00000072062;ENSG00000072401;ENSG00000072609;ENSG00000072803…
GO:0048193	Golgi vesicle transport	0.229287	1.58391	0	0.150196	313	100	22920;55763;22820;4905;164;1314;91949;10121;55770;10671;2580;1781;26958;9522;11345;27095;10540;5870;29959;55860;201475;3831;23259;51112;7405;8452;122553;8774;64083;375;1780;403;11196;1453;22818;11127;10564;6293;378;830;5862;57222;51693;83696;372;8775;55738;4644;9218;9570;5584;5537;84516;81876;55014;222068;64837;9135;375056;7415;10890;29097;2621;10342;9371;55291;2060;6643;373;51560;374868;23256;62…	ENSG00000004059;ENSG00000008256;ENSG00000029725;ENSG00000034713;ENSG00000036257;ENSG00000053501;ENSG00000054116;ENSG00000065000;ENSG00000073969;ENSG00000075945;ENSG00000077380;ENSG00000084733;ENSG00000085365;ENSG00000085788;ENSG00000085832;ENSG00000087502;ENSG00000090989;ENSG00000092108;ENSG00000095139;ENSG00000100528;ENSG00000101199;ENSG00000101350;ENSG00000101558;ENSG00000103544;ENSG00000104388…
GO:0070646	protein modification by small protein removal	0.238178	1.56286	0.00343053	0.150747	244	95	8027;5887;5708;56943;9101;93973;9804;55611;10920;7528;29086;8237;10445;5711;51616;10010;5710;7398;7874;3607;10197;8239;55593;5688;57599;2873;51138;84640;50813;125476;6885;1861;5684;80013;5690;5886;7353;93624;26054;7415;5700;10600;5683;8724;9577;5689;59343;10208;5687;85015;9491;3091;5682;5714;5694;9861;10213;23326;8665;8533;9097;60;7321;324;221656;5702;10713;5720;4087;8314;54764;84749;9318;10987;2…	ENSG00000008018;ENSG00000019995;ENSG00000036672;ENSG00000041357;ENSG00000058056;ENSG00000068308;ENSG00000068878;ENSG00000070010;ENSG00000072401;ENSG00000075624;ENSG00000079387;ENSG00000087152;ENSG00000087191;ENSG00000092010;ENSG00000095261;ENSG00000099341;ENSG00000100221;ENSG00000100567;ENSG00000100644;ENSG00000100764;ENSG00000100811;ENSG00000100902;ENSG00000101182;ENSG00000101557;ENSG00000102226…
GO:0016050	vesicle organization	0.234221	1.56614	0.0017094	0.151104	260	81	27072;8027;4905;399979;164;9101;137492;55823;5869;27183;23176;27095;5864;7405;116841;8452;122553;64083;375;1182;11196;1453;6616;10564;5289;29887;128866;51693;83696;8417;8775;9218;9570;23355;5584;5537;9525;55353;81876;55014;9798;375056;10342;158866;7251;8724;23557;55291;1173;6857;2060;2901;51028;29911;5270;23256;6272;357;63915;9527;57132;10815;9519;10814;55111;22872;10175;155382;84286;5119;7879;10…	ENSG00000006715;ENSG00000028839;ENSG00000036257;ENSG00000054116;ENSG00000065000;ENSG00000067715;ENSG00000073969;ENSG00000074319;ENSG00000075785;ENSG00000078142;ENSG00000079950;ENSG00000085832;ENSG00000086300;ENSG00000092108;ENSG00000095066;ENSG00000100528;ENSG00000101421;ENSG00000101558;ENSG00000102383;ENSG00000104164;ENSG00000104341;ENSG00000104886;ENSG00000104888;ENSG00000105186;ENSG00000105402…
GO:0042326	negative regulation of phosphorylation	-0.226885	-1.63303	0	0.152106	332	76	79706;64853;9711;1739;161742;23603;58533;80725;867;57521;221496;203228;4771;5591;5062;64754;1855;56940;83737;51347;6622;122809;6653;79893;284;9655;5569;140775;6774;284996;51231;78986;9611;103;5573;4916;5925;7532;55364;5048;1756;408;51527;2764;8661;57447;23435;387;10048;26973;10614;23411;3156;10527;4763;55870;10464;11329;5170;9555;7320;753;2218;5525;4089;55333;801;10771;1540;10114;5611;84619;10399…	ENSG00000007168;ENSG00000010017;ENSG00000015171;ENSG00000066027;ENSG00000067560;ENSG00000070018;ENSG00000075711;ENSG00000078747;ENSG00000083535;ENSG00000083799;ENSG00000096717;ENSG00000100744;ENSG00000102580;ENSG00000105053;ENSG00000106692;ENSG00000107404;ENSG00000107581;ENSG00000108946;ENSG00000110172;ENSG00000110395;ENSG00000110422;ENSG00000110880;ENSG00000112079;ENSG00000112679;ENSG00000113161…
GO:0043648	dicarboxylic acid metabolic process	0.289799	1.56865	0.00932836	0.152919	79	23	2729;6390;2806;84706;2805;159;4190;5264;8604;2571;8803;2730;4967;23057;2271;57001;2572;7915;4191;25902;2686;8802;10873	ENSG00000001084;ENSG00000014641;ENSG00000023909;ENSG00000035687;ENSG00000091483;ENSG00000105953;ENSG00000107537;ENSG00000112294;ENSG00000115840;ENSG00000117118;ENSG00000120053;ENSG00000120254;ENSG00000125166;ENSG00000128683;ENSG00000131067;ENSG00000136143;ENSG00000136750;ENSG00000146701;ENSG00000151376;ENSG00000157064;ENSG00000163541;ENSG00000166123;ENSG00000196636
GO:0051602	response to electrical stimulus	0.376445	1.58505	0.0168856	0.153747	30	8	4976;7976;3760;159;5864;23774;10891;23191	ENSG00000035687;ENSG00000100425;ENSG00000104290;ENSG00000105649;ENSG00000109819;ENSG00000162989;ENSG00000198836;ENSG00000273749
GO:0055067	monovalent inorganic cation homeostasis	0.280301	1.55251	0.00731261	0.157458	90	28	5594;5538;55858;11261;23312;506;1312;1182;481;9498;9990;51606;23557;84679;27131;9114;84286;7879;65082;57282;8671;3778;147007;23327;9777;23315;476;3757	ENSG00000047249;ENSG00000049759;ENSG00000050438;ENSG00000055118;ENSG00000065923;ENSG00000075785;ENSG00000080493;ENSG00000089006;ENSG00000093010;ENSG00000100030;ENSG00000101337;ENSG00000104093;ENSG00000109572;ENSG00000110955;ENSG00000127419;ENSG00000131238;ENSG00000134851;ENSG00000139719;ENSG00000140199;ENSG00000143153;ENSG00000143553;ENSG00000144290;ENSG00000156113;ENSG00000159720;ENSG00000163399…
GO:0097066	response to thyroid hormone	0.437718	1.58596	0.0407767	0.15768	18	6	2729;687;9804;1508;2730;10891	ENSG00000001084;ENSG00000023909;ENSG00000109819;ENSG00000119138;ENSG00000164733;ENSG00000173726
GO:0015931	nucleobase-containing compound transport	-0.243485	-1.61753	0	0.162515	198	74	55153;84912;284439;10250;55795;29894;22916;7884;10559;29890;51000;26993;7014;6396;51692;9785;8737;6429;3181;23165;6426;2332;55339;6428;6830;9887;3267;79902;9793;29072;8106;8888;84271;51808;1660;9908;57122;23381;55186;23293;54890;7175;23279;6432;10482;57097;5903;23443;10211;51068;25909;64062;55677;2733;4928;5036;6311;55421;9818;8570;7355;26019;11260;7919;11052;6421;9295;5813;7514;6431;3192;91746;2…	ENSG00000011243;ENSG00000030066;ENSG00000047410;ENSG00000070366;ENSG00000071894;ENSG00000074356;ENSG00000082898;ENSG00000083896;ENSG00000088247;ENSG00000091542;ENSG00000100227;ENSG00000100836;ENSG00000102081;ENSG00000102100;ENSG00000109111;ENSG00000110713;ENSG00000111224;ENSG00000111581;ENSG00000111605;ENSG00000112081;ENSG00000114120;ENSG00000114503;ENSG00000115875;ENSG00000116350;ENSG00000116560…
GO:0018205	peptidyl-lysine modification	-0.228156	-1.61084	0	0.165398	297	77	6598;84289;26038;55011;10536;79594;8536;11143;151050;57634;9869;6877;54790;79723;1786;9070;6830;10055;7994;3066;29072;64754;6622;55689;54556;10664;2033;546;55209;5903;22938;408;10210;80349;405;10054;26036;1499;55818;10014;55904;55677;322;58508;23411;6018;284058;55870;23512;9555;10902;4193;205564;54904;55167;22823;4089;7403;5929;114799;55274;80335;80854;10363;26168;57337;115426;7468;51111;23522;79…	ENSG00000005483;ENSG00000048649;ENSG00000055609;ENSG00000071243;ENSG00000083168;ENSG00000085224;ENSG00000090432;ENSG00000096717;ENSG00000099956;ENSG00000100393;ENSG00000100603;ENSG00000102974;ENSG00000104872;ENSG00000108840;ENSG00000109111;ENSG00000109685;ENSG00000110066;ENSG00000110811;ENSG00000112200;ENSG00000112983;ENSG00000113648;ENSG00000115548;ENSG00000116254;ENSG00000116539;ENSG00000117000…
GO:0048536	spleen development	-0.42479	-1.6188	0.0246914	0.165757	21	11	3720;55795;25;596;6868;5423;5591;28982;149041;54542;5087	ENSG00000008083;ENSG00000056586;ENSG00000070501;ENSG00000097007;ENSG00000126226;ENSG00000135870;ENSG00000151694;ENSG00000162769;ENSG00000171791;ENSG00000185630;ENSG00000253729
GO:0071166	ribonucleoprotein complex localization	-0.265333	-1.58725	0.00218341	0.167607	109	46	55153;10250;55795;29894;22916;7884;29890;26993;51692;9785;6429;3181;23165;6426;55339;6428;6830;9887;3267;79902;29072;8106;84271;57122;23381;23293;54890;7175;23279;6432;10482;5903;51068;55677;2733;4928;5036;9818;26019;11260;7919;9295;7514;6431;91746;23049	ENSG00000011243;ENSG00000030066;ENSG00000047410;ENSG00000070366;ENSG00000071894;ENSG00000082898;ENSG00000083896;ENSG00000091542;ENSG00000100227;ENSG00000100836;ENSG00000109111;ENSG00000110713;ENSG00000111581;ENSG00000112081;ENSG00000114503;ENSG00000115875;ENSG00000116350;ENSG00000116698;ENSG00000116754;ENSG00000119203;ENSG00000119392;ENSG00000122566;ENSG00000124193;ENSG00000125450;ENSG00000126226…
GO:0051169	nuclear transport	-0.224014	-1.58776	0	0.171124	290	100	55153;55341;5781;10250;55795;29894;5514;22931;22916;7884;84934;868;26953;29890;26993;5310;64328;79711;5469;6628;55027;51692;9785;6429;3326;5571;8536;9702;3181;23165;6426;10892;84268;55339;6428;6830;10768;9887;3267;79902;8720;51715;29072;8106;84271;51808;1660;284;30000;1020;57122;23381;5569;127933;3840;23293;11214;4659;6774;54890;7175;23279;6432;10482;406;5903;51366;473;116988;51068;64062;4734;556…	ENSG00000008710;ENSG00000011243;ENSG00000030066;ENSG00000041802;ENSG00000047410;ENSG00000058272;ENSG00000064419;ENSG00000069869;ENSG00000070366;ENSG00000071894;ENSG00000082898;ENSG00000083896;ENSG00000091542;ENSG00000096384;ENSG00000096717;ENSG00000096968;ENSG00000099246;ENSG00000100227;ENSG00000100401;ENSG00000100836;ENSG00000104517;ENSG00000105576;ENSG00000108424;ENSG00000109111;ENSG00000110713…
GO:0034502	protein localization to chromosome	-0.30215	-1.59417	0.0179372	0.17189	63	26	7013;10576;55506;6950;7014;55011;91782;221496;84250;22948;25836;29072;55920;10664;908;10575;546;23383;7203;5925;9183;55719;10694;9555;10574;80351	ENSG00000085224;ENSG00000086827;ENSG00000099284;ENSG00000102974;ENSG00000104872;ENSG00000107854;ENSG00000113648;ENSG00000115484;ENSG00000119906;ENSG00000120438;ENSG00000129933;ENSG00000132604;ENSG00000133302;ENSG00000135624;ENSG00000139687;ENSG00000146731;ENSG00000147457;ENSG00000147601;ENSG00000150753;ENSG00000156261;ENSG00000161904;ENSG00000163468;ENSG00000164190;ENSG00000166226;ENSG00000179051…
GO:0034504	protein localization to nucleus	-0.235887	-1.58996	0	0.172743	217	69	23345;868;55726;26953;10576;6950;7486;255919;79711;9451;5469;55027;23568;3326;6662;11143;9258;9702;54623;84268;4771;5356;402;22948;79902;23515;8720;51715;1855;29997;284;30000;1020;908;57122;5569;3840;10575;6774;7203;7175;406;5903;51366;473;6794;10210;116988;51068;10694;4928;23435;585;200576;23411;9818;10527;4763;10574;4193;811;3837;7514;23534;10526;3192;3717;5905;5295	ENSG00000006712;ENSG00000047410;ENSG00000064102;ENSG00000064419;ENSG00000082898;ENSG00000096384;ENSG00000096717;ENSG00000096968;ENSG00000100401;ENSG00000102931;ENSG00000104517;ENSG00000105373;ENSG00000105576;ENSG00000107404;ENSG00000108424;ENSG00000110713;ENSG00000111581;ENSG00000112210;ENSG00000114423;ENSG00000115020;ENSG00000115484;ENSG00000118046;ENSG00000120438;ENSG00000120948;ENSG00000125398…
GO:0035459	cargo loading into vesicle	-0.449491	-1.59544	0.0432099	0.174767	17	10	5861;10972;6396;10483;10802;10484;10427;9632;8301;56681	ENSG00000073921;ENSG00000079332;ENSG00000100934;ENSG00000101310;ENSG00000113615;ENSG00000138069;ENSG00000138802;ENSG00000157020;ENSG00000170348;ENSG00000176986
GO:0043687	post-translational protein modification	0.225509	1.53399	0.00173611	0.174977	280	85	8451;334;5708;23291;23287;10920;10238;4008;25879;26268;8816;5864;6921;50717;5711;55832;5710;84861;8452;140739;63894;26190;55175;8454;1121;6923;10197;90135;8065;140460;5688;55827;2873;51138;50813;5862;5684;5868;79672;7857;5690;54461;8945;29106;81876;93611;375056;5700;2621;5683;51246;5689;5687;9491;3091;9040;5682;51667;64122;9230;5931;26235;140461;1114;5714;5694;9861;10213;8533;51280;26263;8453;570…	ENSG00000008018;ENSG00000013374;ENSG00000036257;ENSG00000055130;ENSG00000068878;ENSG00000071073;ENSG00000072803;ENSG00000084234;ENSG00000085978;ENSG00000087191;ENSG00000089199;ENSG00000092010;ENSG00000095261;ENSG00000099341;ENSG00000099910;ENSG00000100567;ENSG00000100644;ENSG00000100764;ENSG00000100902;ENSG00000101182;ENSG00000102054;ENSG00000103363;ENSG00000104112;ENSG00000104388;ENSG00000105649…
GO:0045787	positive regulation of cell cycle	-0.228775	-1.59831	0	0.175702	286	65	8317;3326;5581;54623;8766;57521;5356;84250;57472;25836;4926;8678;4194;51143;23137;10869;1778;55920;6198;2033;3643;29766;546;7175;5641;5925;25904;79848;5048;472;23019;4848;85459;9337;6683;55719;55904;900;387;9475;137886;5229;252983;54617;55023;905;9555;4193;7320;10514;7919;3276;6421;811;5586;1025;351;5087;5934;115426;3192;51433;904;4040;26057	ENSG00000005483;ENSG00000006712;ENSG00000007168;ENSG00000021574;ENSG00000047410;ENSG00000065243;ENSG00000067560;ENSG00000070018;ENSG00000082258;ENSG00000085224;ENSG00000089053;ENSG00000096384;ENSG00000097046;ENSG00000100393;ENSG00000100600;ENSG00000103479;ENSG00000103769;ENSG00000104218;ENSG00000108443;ENSG00000111596;ENSG00000113300;ENSG00000113328;ENSG00000113648;ENSG00000116560;ENSG00000119048…
GO:0048638	regulation of developmental growth	-0.228997	-1.56081	0.00458716	0.192573	243	90	4208;85407;583;375790;285590;10038;6647;27230;3897;1019;80014;5600;10507;6608;1946;8835;57731;7224;2261;54910;3720;1785;5781;5802;23025;25;10413;7422;10269;596;1027;23011;10505;64218;6259;10939;8879;7143;659;81565;79594;223117;55777;80128;6387;4897;60485;8766;2690;5591;25836;91584;657;3475;6722;1020;6198;2803;28982;29882;3643;6774;118813;5727;6788;5641;4916;137964;23499;5048;5290;4133;22902;6860;…	ENSG00000006652;ENSG00000007168;ENSG00000008083;ENSG00000011454;ENSG00000018189;ENSG00000060138;ENSG00000068078;ENSG00000072315;ENSG00000078018;ENSG00000079805;ENSG00000080371;ENSG00000081189;ENSG00000084073;ENSG00000085733;ENSG00000090432;ENSG00000091129;ENSG00000092964;ENSG00000097007;ENSG00000100600;ENSG00000101109;ENSG00000103769;ENSG00000104375;ENSG00000105426;ENSG00000107562;ENSG00000107779…
GO:0008277	regulation of G protein-coupled receptor signaling pathway	-0.270914	-1.56378	0.00412371	0.193242	99	32	1759;1609;1785;2771;2869;2850;3351;409;5082;10868;6855;156;333;7529;6093;493;6622;23173;9397;2870;10988;5341;23322;408;6002;636;9737;9475;801;4836;29767;23032	ENSG00000058668;ENSG00000067900;ENSG00000077254;ENSG00000079805;ENSG00000102003;ENSG00000103494;ENSG00000105290;ENSG00000106976;ENSG00000111142;ENSG00000114353;ENSG00000115956;ENSG00000128872;ENSG00000134318;ENSG00000135312;ENSG00000136448;ENSG00000136878;ENSG00000136940;ENSG00000137486;ENSG00000141480;ENSG00000145214;ENSG00000145335;ENSG00000151746;ENSG00000152465;ENSG00000159788;ENSG00000164024…
GO:0051653	spindle localization	-0.357326	-1.54816	0.035343	0.199698	32	12	56776;1639;81565;4926;1778;4627;5048;9183;3064;137886;3837;10097	ENSG00000007168;ENSG00000086827;ENSG00000100345;ENSG00000108424;ENSG00000137497;ENSG00000138071;ENSG00000155816;ENSG00000166579;ENSG00000197102;ENSG00000197386;ENSG00000204843;ENSG00000215114
GO:0007034	vacuolar transport	0.257832	1.49693	0.016158	0.200804	117	42	27072;164;2580;55823;27183;30849;201475;63894;375;6293;128866;138050;9570;26985;54664;9525;66008;79158;51520;54602;7415;7251;23557;388;51028;29911;55737;80762;9114;6272;9648;84572;757;65018;57132;5119;7879;65082;55850;8943;23295;1130	ENSG00000006715;ENSG00000053501;ENSG00000065000;ENSG00000069329;ENSG00000074319;ENSG00000075785;ENSG00000090581;ENSG00000095066;ENSG00000101421;ENSG00000102471;ENSG00000102858;ENSG00000106460;ENSG00000108433;ENSG00000111670;ENSG00000115993;ENSG00000119541;ENSG00000131165;ENSG00000131507;ENSG00000132612;ENSG00000133706;ENSG00000134243;ENSG00000135968;ENSG00000136100;ENSG00000139719;ENSG00000142188…
GO:0035264	multicellular organism growth	-0.2577	-1.54989	0.00884956	0.202195	116	49	5324;583;84159;285590;83931;1717;6647;677;1019;7516;6608;57578;8835;57731;25937;114789;6654;59338;5916;5781;6712;10269;23038;596;10939;8879;55777;2690;25836;79718;5930;28982;6774;5727;546;5641;137964;5290;26058;8195;585;1385;7403;2844;54542;351;80351;6506;2820	ENSG00000011454;ENSG00000018408;ENSG00000056586;ENSG00000084073;ENSG00000085224;ENSG00000100600;ENSG00000107679;ENSG00000107854;ENSG00000110436;ENSG00000112964;ENSG00000115159;ENSG00000115904;ENSG00000118260;ENSG00000120833;ENSG00000121879;ENSG00000122257;ENSG00000125124;ENSG00000125863;ENSG00000128602;ENSG00000133958;ENSG00000135446;ENSG00000140463;ENSG00000141385;ENSG00000142168;ENSG00000142192…
GO:0036119	response to platelet-derived growth factor	-0.40612	-1.53995	0.0487805	0.20359	20	11	54206;7525;57175;5962;94056;538;2241;92154;867;8826;1385	ENSG00000110395;ENSG00000116285;ENSG00000118260;ENSG00000132613;ENSG00000137710;ENSG00000140575;ENSG00000151422;ENSG00000165240;ENSG00000169895;ENSG00000172725;ENSG00000176105
GO:0051258	protein polymerization	0.232349	1.49812	0.00736648	0.203793	214	70	4976;10109;10787;5217;1859;10152;5058;114791;119;2185;136319;7417;81873;11170;8522;50810;10844;6904;10094;55607;118;375;1453;23271;8851;253260;830;2475;440145;10059;10093;23332;23116;133746;375189;58497;55845;23191;9113;2059;22919;5756;7283;24139;4204;56907;65018;55435;8440;120;10096;348110;221074;10456;1070;5879;123720;2258;3925;51466;3093;27175;10810;89795;55761;54942;7111;2879;9463;57606	ENSG00000007237;ENSG00000037042;ENSG00000052841;ENSG00000061676;ENSG00000067798;ENSG00000070087;ENSG00000071051;ENSG00000074054;ENSG00000075340;ENSG00000078140;ENSG00000087274;ENSG00000087470;ENSG00000100151;ENSG00000101367;ENSG00000105887;ENSG00000109171;ENSG00000111229;ENSG00000115091;ENSG00000117632;ENSG00000118200;ENSG00000119328;ENSG00000120899;ENSG00000125746;ENSG00000129682;ENSG00000130640…
GO:0018200	peptidyl-glutamic acid modification	0.403699	1.48732	0.0679612	0.204479	20	9	23287;79739;25809;154807;340351;25941;29105;158135;91978	ENSG00000070761;ENSG00000100271;ENSG00000134779;ENSG00000135049;ENSG00000137941;ENSG00000141933;ENSG00000146856;ENSG00000175764;ENSG00000196715
GO:0061919	process utilizing autophagic mechanism	0.210067	1.49047	0	0.204758	413	118	27072;8027;55763;9373;10769;29110;9927;137492;55823;167410;9895;51699;23265;27183;51382;5599;11345;26073;1977;66036;65991;30849;9706;201475;11043;7405;84861;254122;529;63894;23118;8925;29979;92140;7416;1612;1213;664;8851;201163;54472;5289;27;79065;5562;6885;128866;83636;257397;2931;51322;23710;5868;2475;60592;10059;57724;5049;91445;93974;1981;9525;5476;81876;55014;10193;51606;51520;534;7248;5566;…	ENSG00000004142;ENSG00000006715;ENSG00000032742;ENSG00000034713;ENSG00000047249;ENSG00000055208;ENSG00000064601;ENSG00000069329;ENSG00000072062;ENSG00000074319;ENSG00000075785;ENSG00000078142;ENSG00000078902;ENSG00000080546;ENSG00000080561;ENSG00000080815;ENSG00000083290;ENSG00000087470;ENSG00000089006;ENSG00000090674;ENSG00000090989;ENSG00000092108;ENSG00000095787;ENSG00000099910;ENSG00000100554…
GO:0000209	protein polyubiquitination	-0.227085	-1.53314	0.00226757	0.204784	224	56	867;57531;7323;10299;246184;80196;83737;9810;331;5930;64750;23608;27339;865;29882;23304;8697;51366;56254;10210;142678;64682;64844;54467;7337;23328;4734;9354;26224;7328;9320;23759;81847;267;154214;54765;84961;10075;7320;9666;55284;51132;4012;26234;9520;149041;329;54542;23321;80351;7267;25820;6049;51433;64795;25831	ENSG00000001629;ENSG00000005812;ENSG00000024048;ENSG00000056586;ENSG00000067955;ENSG00000069869;ENSG00000078747;ENSG00000085382;ENSG00000086758;ENSG00000089053;ENSG00000092148;ENSG00000094880;ENSG00000100023;ENSG00000101966;ENSG00000103549;ENSG00000104343;ENSG00000104517;ENSG00000107854;ENSG00000108306;ENSG00000108854;ENSG00000109332;ENSG00000109654;ENSG00000110107;ENSG00000110330;ENSG00000110344…
GO:0030522	intracellular receptor signaling pathway	-0.226521	-1.52886	0.00455581	0.206278	231	46	83737;1655;29997;331;84498;23376;9667;1390;8805;2033;8517;865;6774;9611;5925;406;23019;22938;51366;23426;4848;9967;7337;1499;4734;55818;55252;387;23411;6294;10902;9969;26065;29966;811;329;79876;1540;10521;3275;6049;3717;9575;23543;23369;26057	ENSG00000014123;ENSG00000054118;ENSG00000055917;ENSG00000067560;ENSG00000067955;ENSG00000069869;ENSG00000078747;ENSG00000081307;ENSG00000083799;ENSG00000095794;ENSG00000096717;ENSG00000096968;ENSG00000100201;ENSG00000100320;ENSG00000100393;ENSG00000100603;ENSG00000101966;ENSG00000104517;ENSG00000105373;ENSG00000108510;ENSG00000108654;ENSG00000110330;ENSG00000111596;ENSG00000112584;ENSG00000112983…
GO:1900115	extracellular regulation of signal transduction	-0.492267	-1.54066	0.0560166	0.206561	11	8	2200;27122;100532736;115950;2201;4052;64388;4043	ENSG00000049323;ENSG00000050165;ENSG00000138829;ENSG00000158747;ENSG00000161914;ENSG00000163956;ENSG00000166147;ENSG00000180875
GO:0051346	negative regulation of hydrolase activity	-0.22828	-1.53397	0.00235849	0.207607	251	77	9353;5962;7079;2771;5799;55125;55795;25;5514;7422;65125;7013;409;63892;4331;54899;7014;132864;81566;10188;8837;55011;5524;161742;5511;10199;4249;6093;163882;9806;402;6197;57709;5062;80196;55105;221692;331;6622;8826;6653;55920;2821;96459;274;80034;8301;65264;79886;57448;408;1741;84240;2029;4133;9162;3551;64062;636;9049;5894;8195;261726;585;9475;23411;1718;7009;64089;4193;10421;329;351;55031;9665;1…	ENSG00000003402;ENSG00000013293;ENSG00000020426;ENSG00000060237;ENSG00000061938;ENSG00000066777;ENSG00000067900;ENSG00000073614;ENSG00000073921;ENSG00000078018;ENSG00000082458;ENSG00000092978;ENSG00000096717;ENSG00000097007;ENSG00000101639;ENSG00000101966;ENSG00000104365;ENSG00000104497;ENSG00000104872;ENSG00000105220;ENSG00000107742;ENSG00000110330;ENSG00000110711;ENSG00000110925;ENSG00000112137…
GO:0099504	synaptic vesicle cycle	0.238688	1.49833	0.0087108	0.208316	172	53	80331;5532;5217;9373;2580;673;2932;63908;5864;9699;116841;1182;22871;6616;8851;9829;9515;54413;1861;9581;26059;8775;5868;2259;10059;10675;23557;23191;6857;321;23208;6861;2901;783;1141;5663;23513;8541;9024;5874;84258;23285;5533;10815;10814;5575;6455;10228;57030;8943;26258;8573;134957	ENSG00000034053;ENSG00000041353;ENSG00000065000;ENSG00000067715;ENSG00000070087;ENSG00000080815;ENSG00000082701;ENSG00000087470;ENSG00000101152;ENSG00000102466;ENSG00000104164;ENSG00000104888;ENSG00000105402;ENSG00000105649;ENSG00000105737;ENSG00000107758;ENSG00000109572;ENSG00000114646;ENSG00000116675;ENSG00000120910;ENSG00000125814;ENSG00000129990;ENSG00000132639;ENSG00000132718;ENSG00000135823…
GO:0018210	peptidyl-threonine modification	0.259314	1.48138	0.0252708	0.209367	99	28	5594;29110;1859;2932;5599;5528;51719;65267;8658;1453;8851;114805;2931;2475;1981;91;5566;146057;63917;442117;27347;1460;51763;790;207;9730;5604;5578	ENSG00000072062;ENSG00000082701;ENSG00000084774;ENSG00000100030;ENSG00000105723;ENSG00000107643;ENSG00000112640;ENSG00000114867;ENSG00000128881;ENSG00000132376;ENSG00000135503;ENSG00000135932;ENSG00000141551;ENSG00000142208;ENSG00000144278;ENSG00000145041;ENSG00000154229;ENSG00000157540;ENSG00000169032;ENSG00000173273;ENSG00000174473;ENSG00000176749;ENSG00000178234;ENSG00000183735;ENSG00000196632…
GO:0034453	microtubule anchoring	-0.382498	-1.52353	0.0432099	0.210092	23	9	1639;9702;5108;9857;636;585;23122;23299;84376	ENSG00000078674;ENSG00000135837;ENSG00000140463;ENSG00000151746;ENSG00000163539;ENSG00000166037;ENSG00000168172;ENSG00000185963;ENSG00000204843
GO:0099003	vesicle-mediated transport in synapse	0.233184	1.49977	0.0120069	0.211011	185	55	80331;5532;5217;2580;3800;673;2932;63908;5864;9699;116841;84896;375;22871;27065;6616;9829;9515;54413;1861;9581;26059;8775;5868;26985;10059;10675;23557;6857;2060;1176;321;23208;6861;2901;55737;783;1141;5663;23513;8541;5874;29058;84258;65018;63915;23285;5533;10815;10814;6455;10228;57030;8943;26258	ENSG00000034053;ENSG00000041353;ENSG00000065000;ENSG00000067715;ENSG00000069329;ENSG00000070087;ENSG00000080815;ENSG00000082701;ENSG00000085832;ENSG00000087470;ENSG00000089063;ENSG00000101152;ENSG00000104164;ENSG00000104888;ENSG00000105402;ENSG00000105649;ENSG00000105737;ENSG00000107758;ENSG00000114646;ENSG00000116675;ENSG00000120910;ENSG00000125814;ENSG00000129990;ENSG00000132639;ENSG00000132718…
GO:0017004	cytochrome complex assembly	0.372055	1.50182	0.0516014	0.21324	28	16	54902;90639;6834;493753;100131801;84300;790955;84987;28958;84275;29796;6341;90624;389203;617;1352	ENSG00000006695;ENSG00000011295;ENSG00000074582;ENSG00000133028;ENSG00000137288;ENSG00000148290;ENSG00000171612;ENSG00000178449;ENSG00000183513;ENSG00000183978;ENSG00000184076;ENSG00000186687;ENSG00000204922;ENSG00000229833;ENSG00000240230;ENSG00000250317
GO:0019882	antigen processing and presentation	0.254002	1.47348	0.0275735	0.216013	118	26	22920;162;164;10121;10671;5869;1781;1211;10540;5870;55860;3831;10120;1175;375;1780;1213;11127;11021;830;84516;3685;64837;10890;9371;1173	ENSG00000042753;ENSG00000075945;ENSG00000077380;ENSG00000084733;ENSG00000100280;ENSG00000101350;ENSG00000104671;ENSG00000111540;ENSG00000111737;ENSG00000115073;ENSG00000122705;ENSG00000126214;ENSG00000131437;ENSG00000131966;ENSG00000138107;ENSG00000138448;ENSG00000141367;ENSG00000143761;ENSG00000158560;ENSG00000161203;ENSG00000166747;ENSG00000166847;ENSG00000174996;ENSG00000175203;ENSG00000175582…
GO:0046390	ribose phosphate biosynthetic process	0.226942	1.46671	0.0106952	0.221598	212	53	1737;5538;142;3251;5165;115;518;159;509;2180;506;515;9524;25874;158;11319;1503;2954;201163;9551;498;38;5162;8604;5562;8050;56474;51727;4967;204;5213;10476;6785;7415;10891;114;201562;5160;7167;55066;151531;5315;2026;3091;790;10606;30968;55312;27109;79071;65018;2977;230	ENSG00000004455;ENSG00000007001;ENSG00000035687;ENSG00000047230;ENSG00000067225;ENSG00000067992;ENSG00000075239;ENSG00000084774;ENSG00000090857;ENSG00000099797;ENSG00000100577;ENSG00000100644;ENSG00000105953;ENSG00000109107;ENSG00000109819;ENSG00000110435;ENSG00000110955;ENSG00000111669;ENSG00000111674;ENSG00000115840;ENSG00000116459;ENSG00000118402;ENSG00000122882;ENSG00000125375;ENSG00000128050…
GO:0031123	RNA 3'-end processing	-0.248541	-1.50987	0.0230415	0.222295	117	47	10250;29894;22916;57508;7884;10978;51095;9646;23404;23016;79882;64895;90459;51692;9785;79577;6429;6426;54623;6829;22849;55339;25896;79869;6428;10768;79670;8106;84271;9810;29101;64852;123169;25962;6432;56254;51585;23318;7919;11052;9295;1025;351;26512;6431;10914;904	ENSG00000006712;ENSG00000071894;ENSG00000072756;ENSG00000075914;ENSG00000083223;ENSG00000090060;ENSG00000100227;ENSG00000100722;ENSG00000100836;ENSG00000102786;ENSG00000103549;ENSG00000104626;ENSG00000107864;ENSG00000108506;ENSG00000111605;ENSG00000112081;ENSG00000114503;ENSG00000115421;ENSG00000115875;ENSG00000116350;ENSG00000116754;ENSG00000119203;ENSG00000124193;ENSG00000129315;ENSG00000130713…
GO:0016073	snRNA metabolic process	-0.2724	-1.51195	0.0172043	0.223588	84	32	22916;5451;57508;2960;55726;6908;5432;23404;5434;23016;8812;7702;5436;6882;25896;6877;2961;51808;64852;79066;92105;64859;65123;55197;58490;51593;905;55174;2957;1025;26512;904	ENSG00000064102;ENSG00000064995;ENSG00000075914;ENSG00000082258;ENSG00000087087;ENSG00000090061;ENSG00000099817;ENSG00000101413;ENSG00000102786;ENSG00000102978;ENSG00000104613;ENSG00000108506;ENSG00000112592;ENSG00000114503;ENSG00000127804;ENSG00000129315;ENSG00000130713;ENSG00000136807;ENSG00000141425;ENSG00000143190;ENSG00000143493;ENSG00000143624;ENSG00000148835;ENSG00000149016;ENSG00000149262…
GO:0035966	response to topologically incorrect protein	-0.234121	-1.50671	0.00697674	0.223795	164	49	10106;10808;7917;9451;55298;1639;55829;55432;55033;10488;10273;3326;3320;3309;37;79139;30001;9217;6388;8720;10113;7494;201595;2033;153222;51182;23190;10130;4287;11080;10133;6745;6782;267;22824;7009;56886;55284;811;468;51726;3308;2673;5611;7873;10399;10525;7184;5295	ENSG00000044574;ENSG00000066427;ENSG00000072778;ENSG00000080824;ENSG00000090520;ENSG00000096384;ENSG00000100219;ENSG00000100393;ENSG00000102580;ENSG00000103266;ENSG00000104343;ENSG00000106080;ENSG00000107175;ENSG00000120694;ENSG00000123240;ENSG00000124164;ENSG00000124783;ENSG00000128272;ENSG00000131871;ENSG00000132581;ENSG00000136731;ENSG00000136986;ENSG00000137522;ENSG00000138073;ENSG00000139644…
GO:0060541	respiratory system development	-0.239378	-1.50134	0.0116822	0.224309	150	51	83931;4124;1717;1522;8985;54206;51057;84695;1956;3988;2246;10454;23152;7067;23210;2034;9231;5916;5156;340419;7068;10413;7422;538;7917;5310;7043;6678;171023;659;6662;6664;3845;60485;3488;657;10427;6722;9678;2033;6670;23322;339829;342371;23347;1499;7881;1385;54542;6431;4040	ENSG00000008710;ENSG00000056586;ENSG00000070018;ENSG00000070495;ENSG00000079432;ENSG00000100324;ENSG00000100393;ENSG00000101160;ENSG00000101596;ENSG00000103494;ENSG00000106397;ENSG00000106443;ENSG00000107779;ENSG00000107798;ENSG00000112658;ENSG00000112715;ENSG00000112893;ENSG00000113140;ENSG00000113578;ENSG00000115318;ENSG00000115461;ENSG00000116016;ENSG00000116285;ENSG00000118260;ENSG00000119699…
GO:0050879	multicellular organismal movement	-0.327884	-1.49739	0.0646552	0.226283	39	11	23336;113246;143187;9456;6198;1938;1756;51542;26058;488;1147	ENSG00000108443;ENSG00000111678;ENSG00000143952;ENSG00000151532;ENSG00000152413;ENSG00000167658;ENSG00000174437;ENSG00000182253;ENSG00000198947;ENSG00000204120;ENSG00000213341
GO:0051647	nucleus localization	-0.388184	-1.50135	0.052	0.228221	20	9	4628;79789;85440;5108;51164;274;5048;5747;84376	ENSG00000007168;ENSG00000078674;ENSG00000116641;ENSG00000132912;ENSG00000133026;ENSG00000136717;ENSG00000165959;ENSG00000168172;ENSG00000169398
GO:0071559	response to transforming growth factor beta	-0.224642	-1.49259	0.00694444	0.228789	187	93	54829;5371;50855;128853;1745;7057;7791;678;7048;7122;56288;857;1284;2200;8425;27122;57669;1003;5045;55553;3248;6660;51341;23370;4090;5654;7311;2201;607;4052;4208;6498;677;1387;8516;3693;7525;858;658;23089;4092;10454;283149;1785;54778;57045;5829;409;2339;50515;7476;7043;8837;659;6770;10273;3326;6662;3309;6868;6664;58533;6093;867;6935;6386;92;3066;56940;657;8576;3688;64750;5796;2033;22938;6794;9392…	ENSG00000003402;ENSG00000005339;ENSG00000033170;ENSG00000044574;ENSG00000049323;ENSG00000050165;ENSG00000067560;ENSG00000067900;ENSG00000073712;ENSG00000077943;ENSG00000079805;ENSG00000081189;ENSG00000082781;ENSG00000089159;ENSG00000090006;ENSG00000090863;ENSG00000096384;ENSG00000096717;ENSG00000100324;ENSG00000100393;ENSG00000100603;ENSG00000101665;ENSG00000102981;ENSG00000103266;ENSG00000104880…
GO:0099072	regulation of postsynaptic membrane neurotransmitter receptor levels	0.275571	1.42904	0.047532	0.244064	62	23	1740;9211;2319;116841;10243;84896;27065;6616;5590;5584;2060;2059;55737;23513;10815;3265;23732;1742;1605;22883;64854;6809;4983	ENSG00000067606;ENSG00000069329;ENSG00000079482;ENSG00000085832;ENSG00000108231;ENSG00000109189;ENSG00000132535;ENSG00000132589;ENSG00000132639;ENSG00000138138;ENSG00000143740;ENSG00000150672;ENSG00000151491;ENSG00000163558;ENSG00000166900;ENSG00000168824;ENSG00000168993;ENSG00000171603;ENSG00000171723;ENSG00000173402;ENSG00000174775;ENSG00000180900;ENSG00000260230
GO:0051668	localization within membrane	0.238685	1.43387	0.0221811	0.244899	133	45	51304;27020;3800;2743;1740;9211;9093;116841;10243;84896;22871;481;56899;27065;6616;8417;5590;375056;2060;5898;2901;81832;55737;23513;51308;5649;54434;10815;22872;3265;55706;5879;57576;8943;1742;11079;1605;22883;57728;3092;55746;9463;64854;128637;6809	ENSG00000006451;ENSG00000058804;ENSG00000065000;ENSG00000067606;ENSG00000069248;ENSG00000069329;ENSG00000079950;ENSG00000084112;ENSG00000085832;ENSG00000100151;ENSG00000103423;ENSG00000105737;ENSG00000108231;ENSG00000109189;ENSG00000109738;ENSG00000117245;ENSG00000125875;ENSG00000127946;ENSG00000132535;ENSG00000132563;ENSG00000132639;ENSG00000136238;ENSG00000138138;ENSG00000138674;ENSG00000143153…
GO:0006413	translational initiation	0.236083	1.44215	0.0217391	0.245484	144	68	8893;5499;4686;1977;56919;10657;83939;1964;3646;28985;1967;2475;6124;1981;8667;6224;8666;10605;6059;84285;4736;6138;10480;6158;8562;440275;6128;27102;123263;1983;6230;27335;1965;8665;22927;8440;1974;1653;23367;10987;8894;51386;6136;6142;51441;6199;6231;10289;6187;1973;6208;220064;6146;8668;8891;6218;6122;6209;8672;6223;1654;6217;9045;6169;6164;6135;3692;6210	ENSG00000005100;ENSG00000008988;ENSG00000070785;ENSG00000071051;ENSG00000075151;ENSG00000079785;ENSG00000084623;ENSG00000086232;ENSG00000089009;ENSG00000100129;ENSG00000100316;ENSG00000100664;ENSG00000103707;ENSG00000104408;ENSG00000105193;ENSG00000105372;ENSG00000105640;ENSG00000108107;ENSG00000109475;ENSG00000111361;ENSG00000114784;ENSG00000114867;ENSG00000115268;ENSG00000116251;ENSG00000118181…
GO:0042176	regulation of protein catabolic process	0.206116	1.43053	0.0138648	0.246194	316	102	5601;5887;2729;4905;10769;10956;5708;9870;9101;55823;51465;2185;2932;22954;11345;27352;7874;8554;29979;1453;10197;4947;80011;2534;9604;79888;2931;57520;51322;11124;5886;93974;8945;55353;5476;10193;5566;7415;5700;8724;57589;9113;369;29934;337867;9491;55737;9529;5270;80762;10425;5774;207;51667;11059;160418;51374;5663;9024;65018;10213;9097;7341;80279;324;84300;26263;165324;5702;4946;9709;90637;7879;…	ENSG00000001084;ENSG00000006025;ENSG00000010810;ENSG00000013374;ENSG00000013561;ENSG00000028528;ENSG00000033800;ENSG00000034713;ENSG00000049759;ENSG00000050748;ENSG00000051108;ENSG00000058056;ENSG00000064601;ENSG00000069329;ENSG00000070159;ENSG00000072062;ENSG00000072609;ENSG00000073969;ENSG00000075785;ENSG00000078061;ENSG00000078140;ENSG00000079387;ENSG00000079482;ENSG00000080815;ENSG00000082701…
GO:0055081	anion homeostasis	0.312132	1.43509	0.0782918	0.247461	36	14	2805;5562;84649;2170;9990;9619;9213;9368;771;5563;57678;57468;1152;8694	ENSG00000062282;ENSG00000074410;ENSG00000109062;ENSG00000119927;ENSG00000120053;ENSG00000121769;ENSG00000124140;ENSG00000132356;ENSG00000140199;ENSG00000143324;ENSG00000160179;ENSG00000162409;ENSG00000166165;ENSG00000185000
GO:0070585	protein localization to mitochondrion	0.247271	1.44369	0.0300353	0.247708	116	35	9868;10469;9927;4285;29103;55823;9804;56947;23203;5599;55486;54708;23788;5562;26520;2931;56993;118424;10059;7533;93974;7385;55750;134266;7029;10953;10425;207;65018;23368;80273;54543;10456;8314;10531	ENSG00000006530;ENSG00000025772;ENSG00000027001;ENSG00000087470;ENSG00000088808;ENSG00000100216;ENSG00000100575;ENSG00000104980;ENSG00000105723;ENSG00000107643;ENSG00000107959;ENSG00000109519;ENSG00000109919;ENSG00000114126;ENSG00000116688;ENSG00000120675;ENSG00000128245;ENSG00000130770;ENSG00000132356;ENSG00000140740;ENSG00000142208;ENSG00000143575;ENSG00000154174;ENSG00000158828;ENSG00000160087…
GO:0014823	response to activity	0.303747	1.44617	0.0479042	0.248926	46	12	4976;2729;2806;9804;158;7384;5562;2475;2730;10891;3091;252995	ENSG00000001084;ENSG00000010256;ENSG00000023909;ENSG00000100644;ENSG00000109819;ENSG00000125166;ENSG00000132356;ENSG00000160097;ENSG00000173726;ENSG00000198793;ENSG00000198836;ENSG00000239900

## Sheet: MDD
geneSet	description	ES	NES	pValue	FDR	size	leadingEdgeNum	leadingEdgeId	userId
GO:0140053	mitochondrial gene expression	0.477029	2.93634	0	0	152	108	3035;55005;85476;55245;7284;26995;65008;7818;54534;51650;5018;64963;51318;28998;81554;63899;10128;28977;51095;6832;51021;78988;124995;25821;55173;56945;90480;11222;9553;80222;65080;51649;51335;219402;55278;9617;22868;4528;2617;285367;64965;28973;60488;23107;60528;7019;26284;54460;64960;51258;29074;64949;54998;10884;55699;51081;57570;26164;9801;54948;54931;63875;51253;115416;29088;84881;57129;5480…	ENSG00000006744;ENSG00000043514;ENSG00000048544;ENSG00000061794;ENSG00000067704;ENSG00000072756;ENSG00000074071;ENSG00000084092;ENSG00000085760;ENSG00000086504;ENSG00000090263;ENSG00000096080;ENSG00000099821;ENSG00000100601;ENSG00000101019;ENSG00000101181;ENSG00000103356;ENSG00000106105;ENSG00000108064;ENSG00000108561;ENSG00000108826;ENSG00000111639;ENSG00000112031;ENSG00000112110;ENSG00000112651…
GO:0033108	mitochondrial respiratory chain complex assembly	0.46217	2.58032	0	0	89	63	493753;4715;4719;55245;55471;5018;51295;55967;137682;29090;25813;4711;4694;4720;4717;374291;4704;25915;4700;91942;4716;51103;54902;4723;7019;55863;55572;4722;4705;4713;79133;4714;4702;4710;285521;90871;4712;4709;84987;84300;4724;4729;90639;4725;57505;55101;644096;4726;79072;10063;4706;4698;29796;4728;6341;4718;4695;84275;29078;4708;28958;51287;617	ENSG00000003509;ENSG00000004779;ENSG00000011295;ENSG00000023228;ENSG00000065518;ENSG00000074582;ENSG00000075336;ENSG00000090266;ENSG00000099795;ENSG00000100347;ENSG00000101019;ENSG00000101247;ENSG00000105341;ENSG00000108064;ENSG00000109390;ENSG00000110074;ENSG00000110717;ENSG00000115286;ENSG00000119013;ENSG00000119421;ENSG00000123545;ENSG00000124279;ENSG00000124608;ENSG00000125356;ENSG00000128609…
GO:0016458	gene silencing	-0.385642	-2.62458	0	0	155	67	10521;26058;10155;3006;9757;5430;51593;57169;192669;5511;4849;1994;8467;8493;22955;27327;55553;9612;54454;9125;8932;55051;23318;23347;10269;25842;192670;23304;103;3181;4848;8726;29066;79829;1655;54487;83989;8289;1981;8085;26523;1786;11176;79670;23411;29102;1660;25904;27161;4686;57690;55183;9869;8520;4087;9931;10526;1788;9611;25942;23112;23378;4204;23019;9555;23369;57472	ENSG00000010803;ENSG00000024048;ENSG00000055917;ENSG00000066044;ENSG00000074266;ENSG00000076108;ENSG00000078687;ENSG00000080345;ENSG00000083223;ENSG00000084073;ENSG00000087087;ENSG00000088038;ENSG00000090905;ENSG00000092847;ENSG00000096717;ENSG00000100201;ENSG00000100354;ENSG00000101596;ENSG00000108654;ENSG00000110583;ENSG00000110693;ENSG00000111596;ENSG00000111875;ENSG00000113300;ENSG00000113360…
GO:0016569	covalent chromatin modification	-0.334359	-2.658	0	0	384	150	1911;5562;54556;10155;3006;10600;79960;6598;9757;54623;94104;171023;4302;9031;166968;23186;2138;56254;165918;10891;387893;5585;84108;84864;23476;22976;158880;26097;1107;7994;339287;58508;5252;1642;26122;51742;7786;10467;79813;8932;10902;55929;2648;56916;6497;55100;151050;57602;23030;10269;6421;26993;57634;123169;9759;5927;63925;10664;51111;10196;8473;1387;79918;6830;201163;25836;7403;26053;51317;…	ENSG00000005339;ENSG00000005483;ENSG00000006459;ENSG00000006712;ENSG00000008083;ENSG00000009954;ENSG00000011243;ENSG00000024048;ENSG00000032219;ENSG00000048649;ENSG00000054267;ENSG00000055483;ENSG00000055609;ENSG00000066135;ENSG00000068024;ENSG00000071243;ENSG00000073614;ENSG00000074266;ENSG00000076108;ENSG00000077684;ENSG00000080345;ENSG00000082068;ENSG00000083168;ENSG00000084073;ENSG00000084676…
GO:1903311	regulation of mRNA metabolic process	-0.379684	-2.75181	0	0	219	106	4343;22916;56339;54464;55677;55795;26528;9704;3178;7316;8106;6432;5976;91746;8087;10658;27316;23404;10521;26058;84991;79811;6428;54623;56254;9904;1994;79066;27327;29890;11338;10179;9667;7514;55095;79048;3842;29896;7072;23367;8683;10949;4116;26135;51010;123169;6433;3297;5725;6830;6294;9646;3181;1859;3192;6434;87178;79577;9810;7936;9567;1655;8021;207;6430;83989;55234;23435;149041;6829;1981;1025;904…	ENSG00000003756;ENSG00000005007;ENSG00000006712;ENSG00000011304;ENSG00000054118;ENSG00000055917;ENSG00000061936;ENSG00000063244;ENSG00000066044;ENSG00000071626;ENSG00000076053;ENSG00000078687;ENSG00000082898;ENSG00000083312;ENSG00000083896;ENSG00000088247;ENSG00000090060;ENSG00000090621;ENSG00000090905;ENSG00000099783;ENSG00000100201;ENSG00000100226;ENSG00000100354;ENSG00000100650;ENSG00000100722…
GO:0040029	regulation of gene expression, epigenetic	-0.422784	-3.03386	0	0	206	102	54496;5253;5976;91746;8087;10658;58487;6602;26058;7913;10155;3006;9015;9757;5430;23451;9031;51593;57169;192669;5511;221830;9188;1994;8467;8493;27327;84108;29890;84172;9612;5252;54454;51742;8932;2648;55051;23318;23347;10269;25842;9759;63925;10664;9425;5394;192670;23304;103;3181;221656;3192;55506;8726;3720;2074;29066;79829;1655;60;54487;83989;57492;8289;1981;8085;26523;9013;9014;1786;11176;9112;796…	ENSG00000005007;ENSG00000008083;ENSG00000009954;ENSG00000024048;ENSG00000032219;ENSG00000049618;ENSG00000054267;ENSG00000055917;ENSG00000066044;ENSG00000066117;ENSG00000068024;ENSG00000074266;ENSG00000075624;ENSG00000076108;ENSG00000078687;ENSG00000080345;ENSG00000083223;ENSG00000083896;ENSG00000084073;ENSG00000087087;ENSG00000090905;ENSG00000092847;ENSG00000094631;ENSG00000096717;ENSG00000099284…
GO:0007034	vacuolar transport	0.408435	2.41442	0	0.000147075	117	59	54664;64400;30849;55737;8678;7415;1130;201475;4074;23484;57617;55187;55681;81609;55297;51510;63894;7251;65082;164;10490;3312;2580;23230;27072;80762;65018;23339;9737;8031;64145;64601;91782;757;9114;9648;27243;23585;9570;55823;27183;64089;84572;375;9525;9482;5071;51028;26985;57132;738;128866;5119;6293;138050;79158;9392;6653;120892	ENSG00000003056;ENSG00000006715;ENSG00000048707;ENSG00000069329;ENSG00000074319;ENSG00000086065;ENSG00000090581;ENSG00000100568;ENSG00000101421;ENSG00000104142;ENSG00000104497;ENSG00000104660;ENSG00000106460;ENSG00000108433;ENSG00000109971;ENSG00000111670;ENSG00000119541;ENSG00000123106;ENSG00000126581;ENSG00000130724;ENSG00000131165;ENSG00000131381;ENSG00000131507;ENSG00000132612;ENSG00000135966…
GO:0031050	dsRNA processing	-0.485524	-2.398	0	0.000182074	42	20	51593;192669;5511;9612;23318;10269;192670;103;3181;29066;1655;54487;26523;79670;29102;27161;4686;4087;9611;23369	ENSG00000055917;ENSG00000083223;ENSG00000084073;ENSG00000087087;ENSG00000092847;ENSG00000108654;ENSG00000113360;ENSG00000117751;ENSG00000122299;ENSG00000122566;ENSG00000123908;ENSG00000126070;ENSG00000128191;ENSG00000134698;ENSG00000134744;ENSG00000136937;ENSG00000141027;ENSG00000160710;ENSG00000175387;ENSG00000196498
GO:0010257	NADH dehydrogenase complex assembly	0.471392	2.43007	0	0.000183844	61	44	4715;4719;55471;5018;51295;55967;137682;29090;4711;4694;4720;4717;374291;4704;25915;4700;91942;4716;51103;4723;55863;55572;4722;4705;4713;79133;4714;4702;4710;90871;4712;4709;4724;4729;4725;55101;4726;4706;4698;4728;4718;4695;29078;4708	ENSG00000003509;ENSG00000004779;ENSG00000023228;ENSG00000065518;ENSG00000075336;ENSG00000090266;ENSG00000099795;ENSG00000101247;ENSG00000105341;ENSG00000109390;ENSG00000110074;ENSG00000110717;ENSG00000115286;ENSG00000119013;ENSG00000119421;ENSG00000123545;ENSG00000125356;ENSG00000128609;ENSG00000130159;ENSG00000130414;ENSG00000131495;ENSG00000136521;ENSG00000137038;ENSG00000137806;ENSG00000139180…
GO:0043687	post-translational protein modification	0.340425	2.36358	0	0.000183844	280	112	23291;9861;23014;79672;9491;26268;5707;5861;334;10197;8065;1121;8883;5709;8450;51246;10970;2822;26100;9140;64326;26190;5704;55832;8454;5689;5862;5716;5684;63894;8945;5710;8766;150465;27252;5876;5718;5708;57542;8453;5717;50813;4924;5868;84861;11091;5034;10213;5706;201595;5690;79269;9039;9836;6500;55175;51667;8533;10987;5713;2873;5720;89890;115290;51451;26224;5695;81876;5701;10116;54461;23463;9978;…	ENSG00000005812;ENSG00000006118;ENSG00000008018;ENSG00000013275;ENSG00000013374;ENSG00000041357;ENSG00000055130;ENSG00000057663;ENSG00000064726;ENSG00000071073;ENSG00000072803;ENSG00000076321;ENSG00000084234;ENSG00000085978;ENSG00000087448;ENSG00000092010;ENSG00000099910;ENSG00000100387;ENSG00000100519;ENSG00000100567;ENSG00000100764;ENSG00000100804;ENSG00000100897;ENSG00000101182;ENSG00000101843…
GO:0008380	RNA splicing	-0.310811	-2.42277	0	0.000208085	357	147	26121;8106;6432;1207;91746;3550;10658;57396;79665;53981;23091;84950;27316;10521;84991;55749;22794;6428;154007;5430;23524;27332;23451;9129;9584;51593;55596;23398;22889;5511;9904;10212;10285;9541;10891;1994;79066;25949;84811;29890;11338;10179;10713;10250;5411;29896;7072;25929;11100;24144;22985;10291;8683;23517;10949;10594;24148;4116;8896;9991;284695;6629;6421;26993;9295;11325;23064;51747;6433;1665;…	ENSG00000003756;ENSG00000007392;ENSG00000011243;ENSG00000011304;ENSG00000021776;ENSG00000033030;ENSG00000039123;ENSG00000054118;ENSG00000060339;ENSG00000061936;ENSG00000063244;ENSG00000064607;ENSG00000065883;ENSG00000066044;ENSG00000067596;ENSG00000068394;ENSG00000074201;ENSG00000075292;ENSG00000076053;ENSG00000076650;ENSG00000079134;ENSG00000082516;ENSG00000083896;ENSG00000087087;ENSG00000087365…
GO:0007033	vacuole organization	0.383616	2.36953	0	0.000210108	143	70	22930;54664;9927;64400;5538;55102;5861;25782;140775;55737;8678;29979;23673;1130;26100;9140;57617;51552;51510;65082;9896;440026;5868;9554;23192;27072;65018;79142;64601;29978;22878;79065;81876;89781;9637;5899;55353;55823;84286;3074;375;23256;55054;81671;84317;55968;10641;11152;56270;53;8720;9474;9776;128866;147007;79158;64422;55004;9821;3257;23400;23710;120892;55626;84557;90410;8396;90678;55062;256…	ENSG00000006715;ENSG00000023287;ENSG00000040633;ENSG00000049860;ENSG00000057663;ENSG00000062716;ENSG00000066739;ENSG00000069329;ENSG00000070540;ENSG00000085978;ENSG00000086065;ENSG00000088833;ENSG00000092108;ENSG00000100099;ENSG00000101421;ENSG00000101460;ENSG00000104142;ENSG00000104341;ENSG00000106460;ENSG00000107521;ENSG00000109083;ENSG00000110497;ENSG00000111670;ENSG00000112367;ENSG00000114388…
GO:0008213	protein alkylation	-0.368502	-2.43882	0	0.000242766	139	58	3006;6598;9757;151194;54623;94104;4302;56254;387893;23476;22976;26097;58508;5252;51742;79813;55251;63925;10664;51111;10196;8473;79918;6830;7403;26053;9646;80204;10919;8726;3720;64324;2145;7936;54790;8085;1786;4297;54904;23512;4089;2091;23411;23081;7468;30827;29072;55183;9869;546;5926;55904;9682;4204;9555;200424;2935;55870	ENSG00000005483;ENSG00000006712;ENSG00000008083;ENSG00000032219;ENSG00000054267;ENSG00000055609;ENSG00000066135;ENSG00000074266;ENSG00000080345;ENSG00000085224;ENSG00000096717;ENSG00000099956;ENSG00000102974;ENSG00000103037;ENSG00000103342;ENSG00000105202;ENSG00000107077;ENSG00000108799;ENSG00000109111;ENSG00000109685;ENSG00000110066;ENSG00000112511;ENSG00000113648;ENSG00000116539;ENSG00000118058…
GO:0048193	Golgi vesicle transport	0.349837	2.43305	0	0.000245126	313	144	403;3831;22818;2181;2060;9371;10134;84364;372;51290;5861;9217;23163;5537;10540;8615;5870;83548;11316;10175;7415;10121;201475;9522;56681;9218;57120;23259;10484;400;51552;11127;10564;5862;22820;29959;55297;22920;59349;55770;22796;27252;830;164;55763;60684;10525;10490;51143;22872;9554;10890;64083;2580;6683;8729;23230;27095;23423;25839;9632;10133;10079;9135;51164;10959;10139;29886;57410;11079;378;280…	ENSG00000021574;ENSG00000029534;ENSG00000029725;ENSG00000047932;ENSG00000054116;ENSG00000054793;ENSG00000075945;ENSG00000076321;ENSG00000079332;ENSG00000079616;ENSG00000083097;ENSG00000084733;ENSG00000085365;ENSG00000085788;ENSG00000085832;ENSG00000086598;ENSG00000087502;ENSG00000090615;ENSG00000090989;ENSG00000092108;ENSG00000093183;ENSG00000095139;ENSG00000100151;ENSG00000100528;ENSG00000100568…
GO:0019882	antigen processing and presentation	0.392127	2.37262	0	0.000245126	118	47	5869;3831;8722;9371;10134;10540;5870;1213;10121;1211;10484;11127;163;1173;22920;4012;830;164;51143;22872;9554;10890;1509;10120;9632;51164;5867;5720;11021;1639;51752;375;29127;84516;140735;6396;55860;1778;5641;9474;114876;10671;160;51128;3835;1780;64837	ENSG00000006125;ENSG00000057663;ENSG00000075945;ENSG00000079616;ENSG00000084733;ENSG00000092010;ENSG00000100600;ENSG00000100934;ENSG00000101350;ENSG00000104671;ENSG00000111540;ENSG00000111737;ENSG00000113441;ENSG00000115073;ENSG00000117984;ENSG00000122705;ENSG00000126214;ENSG00000131437;ENSG00000131966;ENSG00000132912;ENSG00000138107;ENSG00000138674;ENSG00000141367;ENSG00000141447;ENSG00000143761…
GO:0006397	mRNA processing	-0.320626	-2.54813	0	0.000291319	414	172	1207;91746;3550;10658;23144;79665;53981;23091;84950;27316;10521;55421;84991;55749;22794;79811;6428;154007;5430;23524;54623;23451;9129;9584;51593;55596;23398;22889;56254;5511;9904;10212;10285;9541;10891;1994;79066;25949;84811;29890;11338;10179;9667;10713;10250;5411;29896;26097;7072;25929;11100;24144;22985;10291;8683;23517;10949;10594;4331;24148;4116;8896;9991;284695;6629;6421;26993;123169;9295;113…	ENSG00000003756;ENSG00000006712;ENSG00000007392;ENSG00000011243;ENSG00000011304;ENSG00000014164;ENSG00000020426;ENSG00000021776;ENSG00000033030;ENSG00000039123;ENSG00000054118;ENSG00000060339;ENSG00000061936;ENSG00000063244;ENSG00000064607;ENSG00000065883;ENSG00000066044;ENSG00000067596;ENSG00000068394;ENSG00000070047;ENSG00000074201;ENSG00000074356;ENSG00000076053;ENSG00000076650;ENSG00000079134…
GO:0098727	maintenance of cell number	-0.36977	-2.37345	0	0.000323687	116	48	182;55818;2146;7101;56339;60485;51586;23091;8243;283149;54623;657;9126;51593;5108;6760;4849;1994;6659;1000;6497;23318;9968;123169;129563;1656;79918;57190;607;25836;9646;4848;79577;8202;8289;4089;23081;5087;79576;51123;55183;4087;23019;9282;80306;5894;79648;84376	ENSG00000006712;ENSG00000066044;ENSG00000072501;ENSG00000078674;ENSG00000080345;ENSG00000087087;ENSG00000088038;ENSG00000099917;ENSG00000101384;ENSG00000101882;ENSG00000103037;ENSG00000106462;ENSG00000107077;ENSG00000107779;ENSG00000108055;ENSG00000110367;ENSG00000111596;ENSG00000112333;ENSG00000115548;ENSG00000116128;ENSG00000117713;ENSG00000118579;ENSG00000120963;ENSG00000123200;ENSG00000124151…
GO:0035329	hippo signaling	-0.489252	-2.36965	0	0.000436978	35	29	7005;284086;51421;10413;79817;6664;154796;7082;8642;7003;26524;8994;6788;4771;836;60485;261734;1856;55233;154810;79633;9231;92597;7531;80014;23286;4140;6789;9113	ENSG00000004975;ENSG00000007866;ENSG00000075413;ENSG00000101109;ENSG00000104067;ENSG00000104375;ENSG00000108953;ENSG00000113645;ENSG00000114019;ENSG00000114978;ENSG00000120162;ENSG00000126016;ENSG00000131023;ENSG00000131697;ENSG00000137693;ENSG00000144791;ENSG00000150457;ENSG00000151208;ENSG00000151718;ENSG00000151748;ENSG00000160602;ENSG00000164305;ENSG00000166025;ENSG00000166341;ENSG00000173542…
GO:1903008	organelle disassembly	0.407697	2.27239	0	0.000817085	89	49	3831;9927;55102;8678;664;10059;7415;665;26100;9140;55187;8562;11140;6683;8729;10133;53918;65018;219402;4528;7416;11315;493856;79065;139341;84749;28985;10193;5071;93974;79594;11152;6721;56270;9474;9776;64422;9821;23400;23710;10456;65991;55626;84557;57103;51024;7443;55062;79752	ENSG00000021574;ENSG00000023287;ENSG00000048707;ENSG00000057663;ENSG00000066739;ENSG00000069509;ENSG00000070540;ENSG00000078237;ENSG00000085760;ENSG00000087470;ENSG00000090432;ENSG00000100749;ENSG00000101460;ENSG00000104231;ENSG00000104765;ENSG00000105401;ENSG00000107862;ENSG00000110497;ENSG00000116288;ENSG00000116688;ENSG00000122033;ENSG00000123240;ENSG00000126214;ENSG00000126581;ENSG00000130770…
GO:0033044	regulation of chromosome organization	-0.313147	-2.32194	0	0.00084968	252	96	23381;79618;10155;51750;3006;6598;9757;54623;94104;4302;56254;144108;7175;10891;84464;7013;23476;22976;26097;142;8452;5252;5885;54454;80169;51112;10467;55226;8658;4331;23293;2648;6497;55100;23137;10269;6421;26993;25842;5927;63925;10664;8473;11284;5394;6830;201163;25836;26053;54552;11011;9646;3181;9252;3192;8726;3720;4361;64324;51366;9810;79829;7936;4683;80351;5925;9183;8260;1025;9320;26036;23063;…	ENSG00000005483;ENSG00000006712;ENSG00000008083;ENSG00000010244;ENSG00000011243;ENSG00000020426;ENSG00000020922;ENSG00000036257;ENSG00000039650;ENSG00000047410;ENSG00000062650;ENSG00000066135;ENSG00000070366;ENSG00000073614;ENSG00000074266;ENSG00000080345;ENSG00000082068;ENSG00000084073;ENSG00000085224;ENSG00000086827;ENSG00000096717;ENSG00000099956;ENSG00000100784;ENSG00000102030;ENSG00000102974…
GO:0008214	protein dealkylation	-0.5035	-2.32665	0	0.000926923	29	20	7320;23135;79831;84678;55818;23133;5253;84864;23030;5927;7403;10765;221656;3720;221037;80853;23081;22992;9682;51780	ENSG00000006459;ENSG00000008083;ENSG00000066135;ENSG00000073614;ENSG00000089094;ENSG00000107077;ENSG00000115548;ENSG00000117139;ENSG00000119048;ENSG00000120733;ENSG00000127663;ENSG00000132510;ENSG00000147050;ENSG00000155666;ENSG00000165097;ENSG00000170854;ENSG00000171988;ENSG00000172943;ENSG00000173120;ENSG00000197724
GO:0006304	DNA modification	-0.389966	-2.28439	0	0.0012325	71	37	10419;4968;2146;64855;7374;54496;29104;10155;81602;55729;4552;8493;8930;142;51008;79813;8932;55929;84164;10269;51010;8239;10664;221656;10919;54790;9219;54737;1786;4297;11176;546;55904;1788;54726;4204;200424	ENSG00000005483;ENSG00000076108;ENSG00000076248;ENSG00000084073;ENSG00000085224;ENSG00000100325;ENSG00000100462;ENSG00000102543;ENSG00000102974;ENSG00000106462;ENSG00000107371;ENSG00000114026;ENSG00000118058;ENSG00000119772;ENSG00000124275;ENSG00000124486;ENSG00000129071;ENSG00000130726;ENSG00000130816;ENSG00000132600;ENSG00000134046;ENSG00000136830;ENSG00000138303;ENSG00000143799;ENSG00000149480…
GO:0007006	mitochondrial membrane organization	0.385336	2.23103	0	0.0014039	107	53	9927;26520;598;10989;10476;515;664;10939;665;4976;81554;1386;498;55735;539;9804;292;25813;282991;637;3308;65018;2932;54927;55750;4836;55288;56993;139322;513;28978;93974;506;79594;509;29928;6548;92609;79568;7529;285521;400916;26517;55669;3320;10971;27109;79135;5599;518;26519;8834;10105	ENSG00000005022;ENSG00000006530;ENSG00000007923;ENSG00000015475;ENSG00000080824;ENSG00000082701;ENSG00000090020;ENSG00000090432;ENSG00000096092;ENSG00000099624;ENSG00000099800;ENSG00000100216;ENSG00000100347;ENSG00000100575;ENSG00000104765;ENSG00000105197;ENSG00000106554;ENSG00000107643;ENSG00000108179;ENSG00000110955;ENSG00000115966;ENSG00000116459;ENSG00000116688;ENSG00000125375;ENSG00000126858…
GO:0006839	mitochondrial transport	0.340357	2.23202	0	0.00154429	202	91	9927;26520;80273;598;7385;10476;515;8034;55737;664;10939;9520;665;9512;131118;10531;51522;10367;10452;4976;1386;498;1537;26128;100287932;539;9804;55186;29090;292;25813;282991;56947;51312;637;3308;65018;2932;55750;54332;134266;4836;57380;55288;90550;89781;31;56993;30968;513;55823;10651;23203;28978;29074;9868;5071;93974;506;79594;509;6721;29928;8604;9776;6548;10055;92609;9049;79568;7529;400916;1045…	ENSG00000005022;ENSG00000006530;ENSG00000015475;ENSG00000069329;ENSG00000075336;ENSG00000080824;ENSG00000082701;ENSG00000090020;ENSG00000090432;ENSG00000096092;ENSG00000099624;ENSG00000099800;ENSG00000100099;ENSG00000100216;ENSG00000100347;ENSG00000100575;ENSG00000102078;ENSG00000104381;ENSG00000104765;ENSG00000105197;ENSG00000105819;ENSG00000107643;ENSG00000107745;ENSG00000107959;ENSG00000108179…
GO:0018205	peptidyl-lysine modification	-0.292623	-2.2426	0	0.00197681	297	88	7994;339287;58508;7917;5252;26122;51742;79813;10902;55929;2648;151050;10269;57634;9759;63925;10664;51111;8473;1387;79918;6830;201163;7403;26053;54552;10401;9646;9252;114799;10919;23522;8726;3720;64324;2145;57337;8202;79829;7936;10524;54790;29843;51601;8295;4193;26036;5977;8085;6879;1786;4297;84289;54904;2033;23512;4089;10013;23411;23081;7468;30827;29072;7329;26054;55209;80314;55183;9869;546;8520;…	ENSG00000005339;ENSG00000005483;ENSG00000008083;ENSG00000032219;ENSG00000048649;ENSG00000054267;ENSG00000055609;ENSG00000066135;ENSG00000068024;ENSG00000074266;ENSG00000079387;ENSG00000080345;ENSG00000083168;ENSG00000084073;ENSG00000084676;ENSG00000085224;ENSG00000094631;ENSG00000096717;ENSG00000100393;ENSG00000100425;ENSG00000100784;ENSG00000102974;ENSG00000103037;ENSG00000103275;ENSG00000107077…
GO:0071514	genetic imprinting	-0.579169	-2.23337	0.00218818	0.00200282	18	13	84333;54496;10155;84108;51742;10664;9646;221656;8726;5926;1788;4204;10336	ENSG00000032219;ENSG00000054267;ENSG00000074266;ENSG00000102974;ENSG00000119772;ENSG00000130726;ENSG00000132600;ENSG00000156374;ENSG00000165097;ENSG00000169057;ENSG00000180628;ENSG00000185619;ENSG00000198730
GO:0010948	negative regulation of cell cycle process	-0.308602	-2.23683	0	0.00203923	214	92	123879;7027;8738;55755;348654;10217;4682;1263;11170;10106;2146;29997;55795;5111;6154;9349;4194;3550;5514;596;3275;8243;1911;26058;146691;835;23468;79960;84142;55031;2273;9126;4849;7175;7013;8812;56890;6659;51343;811;25949;641;84108;23269;5933;5885;9125;8658;79813;2648;5934;5932;3364;80012;5311;10201;6015;4848;10919;79577;8726;1112;4361;4683;5591;5925;9183;8260;4193;1025;79027;23063;2956;51720;934…	ENSG00000010244;ENSG00000020922;ENSG00000022267;ENSG00000047410;ENSG00000053254;ENSG00000062650;ENSG00000072501;ENSG00000074266;ENSG00000077684;ENSG00000080802;ENSG00000080839;ENSG00000085224;ENSG00000086827;ENSG00000087206;ENSG00000088038;ENSG00000090061;ENSG00000094916;ENSG00000100393;ENSG00000101773;ENSG00000102030;ENSG00000103274;ENSG00000103479;ENSG00000104320;ENSG00000105325;ENSG00000105373…
GO:0043631	RNA polyadenylation	-0.434375	-2.22591	0	0.00205637	44	19	123169;3297;51585;9646;87178;79577;9810;7936;8189;6829;1025;904;11052;79869;25962;4686;79882;10914;22828	ENSG00000090060;ENSG00000100722;ENSG00000103549;ENSG00000111605;ENSG00000125755;ENSG00000129315;ENSG00000134371;ENSG00000136807;ENSG00000136937;ENSG00000138035;ENSG00000149532;ENSG00000164944;ENSG00000165494;ENSG00000166477;ENSG00000185122;ENSG00000196235;ENSG00000198730;ENSG00000204356;ENSG00000213079
GO:0070585	protein localization to mitochondrion	0.369669	2.17782	0	0.00220613	116	54	9927;26520;80273;7385;23788;10059;9520;665;9512;131118;10531;10452;100287932;9804;29090;25813;3098;56947;637;3308;65018;55750;54332;134266;4836;89781;56993;55823;3301;23203;9868;5071;93974;4137;6721;29928;9776;10055;92609;9049;79568;7529;285521;10456;118424;26517;130916;120892;54708;3320;10971;51024;26521;5599	ENSG00000006530;ENSG00000015475;ENSG00000075336;ENSG00000080824;ENSG00000086061;ENSG00000087470;ENSG00000099800;ENSG00000100099;ENSG00000100216;ENSG00000100347;ENSG00000100575;ENSG00000104381;ENSG00000104765;ENSG00000105197;ENSG00000105819;ENSG00000107643;ENSG00000107959;ENSG00000109519;ENSG00000109919;ENSG00000110711;ENSG00000116688;ENSG00000122085;ENSG00000130204;ENSG00000130770;ENSG00000134308…
GO:0006414	translational elongation	0.356781	2.14834	0	0.00267887	122	80	16;85476;7284;65008;7818;54534;51650;5018;64963;51318;28998;120526;28977;51021;78988;124995;55173;56945;90480;11222;9553;65080;51649;51714;64965;28973;60488;23107;26046;26284;54460;54952;64960;51258;29074;64949;54998;10884;51081;9801;54948;63875;51253;56648;29088;57129;64928;51264;65005;55168;285381;10767;118487;92259;1917;51642;740;219927;64979;22849;65993;51069;122704;84340;10573;64981;10102;33…	ENSG00000048544;ENSG00000061794;ENSG00000074071;ENSG00000086504;ENSG00000090263;ENSG00000090861;ENSG00000096080;ENSG00000100601;ENSG00000101210;ENSG00000105364;ENSG00000106591;ENSG00000107864;ENSG00000108826;ENSG00000111639;ENSG00000112110;ENSG00000112339;ENSG00000112651;ENSG00000112996;ENSG00000113048;ENSG00000114686;ENSG00000115364;ENSG00000116221;ENSG00000116898;ENSG00000123297;ENSG00000125445…
GO:0006091	generation of precursor metabolites and energy	0.300399	2.14976	0	0.00282837	366	166	1327;9852;4715;1743;4719;7385;5315;10476;515;4967;664;10327;5213;7415;79675;1355;2936;9512;5018;5290;1737;3419;55967;498;1537;2673;2230;6715;539;4436;2475;9167;7384;80025;57019;3098;4711;637;5230;246269;4694;2271;10539;4720;4717;65018;5214;2932;5160;55753;374291;4704;22868;4700;201626;7360;3416;3658;91942;80219;4716;10007;51103;11315;38;2026;4723;669;51763;80142;5257;5499;30968;5834;513;2821;4722…	ENSG00000005194;ENSG00000005469;ENSG00000008283;ENSG00000010256;ENSG00000014641;ENSG00000014919;ENSG00000015475;ENSG00000023228;ENSG00000023287;ENSG00000049769;ENSG00000065518;ENSG00000065615;ENSG00000066926;ENSG00000067057;ENSG00000067225;ENSG00000067829;ENSG00000072682;ENSG00000073578;ENSG00000075239;ENSG00000078237;ENSG00000079739;ENSG00000082701;ENSG00000083720;ENSG00000084092;ENSG00000085662…
GO:0006401	RNA catabolic process	-0.295074	-2.1966	0	0.00291319	275	116	11044;4343;55629;6201;2081;22916;56339;54464;6169;23708;55795;1763;6154;9704;9349;7316;23644;6191;5976;6143;8087;9811;6164;6124;23404;26058;23381;6187;6142;84153;9887;6170;6128;22794;9045;6205;6161;6499;6155;6168;192669;5511;4849;1994;79066;4292;27327;3646;65110;7514;55095;79048;3842;6189;23367;9125;23517;10949;4116;23293;26135;6147;6158;23318;51010;129563;6224;22803;5394;1656;192670;3192;4848;87…	ENSG00000005007;ENSG00000008988;ENSG00000038358;ENSG00000039123;ENSG00000054118;ENSG00000055917;ENSG00000066044;ENSG00000070366;ENSG00000076242;ENSG00000078687;ENSG00000080802;ENSG00000082898;ENSG00000083223;ENSG00000083312;ENSG00000088038;ENSG00000088247;ENSG00000088930;ENSG00000089009;ENSG00000090621;ENSG00000090905;ENSG00000092847;ENSG00000099783;ENSG00000100226;ENSG00000100316;ENSG00000100354…
GO:0061919	process utilizing autophagic mechanism	0.294455	2.13724	0	0.00303956	413	171	9550;22930;440275;9927;310;30849;55102;5861;8672;53349;25782;9538;29110;140775;55737;8678;664;10059;29979;23673;7415;1213;665;8027;201475;92140;26100;9140;57617;5290;5049;10484;55187;23032;10325;535;137492;63894;9528;7251;65082;25851;2072;55763;5291;9100;257397;10490;440026;5868;27244;9554;2475;3312;8925;84861;23192;11140;84148;23230;10133;27072;55432;65018;29919;23339;79142;64121;51534;7416;6460…	ENSG00000004142;ENSG00000006715;ENSG00000009844;ENSG00000014216;ENSG00000023287;ENSG00000033627;ENSG00000040633;ENSG00000048707;ENSG00000051382;ENSG00000057663;ENSG00000058056;ENSG00000062716;ENSG00000066739;ENSG00000069329;ENSG00000069509;ENSG00000070540;ENSG00000072062;ENSG00000074319;ENSG00000075151;ENSG00000077254;ENSG00000078237;ENSG00000080546;ENSG00000080824;ENSG00000083750;ENSG00000083937…
GO:0010498	proteasomal protein catabolic process	0.289841	2.09474	0	0.00468803	395	163	23291;27248;9354;51434;25852;10299;9861;10134;9491;26268;5707;6400;10197;267;11124;80196;160418;8450;5887;29979;7326;7874;4189;7415;64839;51185;64326;27339;29945;5704;8454;80267;23197;5689;8554;9604;130507;4287;5716;5684;6613;8945;5527;9184;5710;10869;27252;5718;5708;64682;51377;57542;200933;996;8697;84861;25898;10213;5706;8924;201595;5690;25820;64795;6500;55432;387921;65018;2932;51667;79139;7965…	ENSG00000004897;ENSG00000005812;ENSG00000008018;ENSG00000013275;ENSG00000013374;ENSG00000013561;ENSG00000033800;ENSG00000041357;ENSG00000050748;ENSG00000053900;ENSG00000055130;ENSG00000058056;ENSG00000063978;ENSG00000066427;ENSG00000068912;ENSG00000070423;ENSG00000071537;ENSG00000072062;ENSG00000072803;ENSG00000076321;ENSG00000077721;ENSG00000078140;ENSG00000078304;ENSG00000078747;ENSG00000082701…
GO:0071985	multivesicular body sorting pathway	0.495106	2.08791	0.00164204	0.00484484	28	15	7415;1130;23484;137492;51510;51534;757;27243;23585;55353;7405;9525;51028;57132;5119	ENSG00000009844;ENSG00000086065;ENSG00000104341;ENSG00000104660;ENSG00000119541;ENSG00000130724;ENSG00000131165;ENSG00000136100;ENSG00000142188;ENSG00000143669;ENSG00000155975;ENSG00000165280;ENSG00000183726;ENSG00000198382;ENSG00000255112
GO:0017004	cytochrome complex assembly	0.487786	2.07233	0.00329489	0.0052702	28	20	493753;55245;1355;29090;54902;1353;285521;84987;84300;90639;79072;3052;10063;1352;29796;6341;84275;28958;51287;617	ENSG00000004961;ENSG00000006695;ENSG00000011295;ENSG00000014919;ENSG00000074582;ENSG00000075336;ENSG00000101019;ENSG00000124279;ENSG00000133028;ENSG00000137288;ENSG00000138495;ENSG00000163626;ENSG00000166260;ENSG00000171612;ENSG00000178449;ENSG00000181924;ENSG00000183513;ENSG00000183978;ENSG00000184076;ENSG00000240230
GO:0071166	ribonucleoprotein complex localization	-0.335871	-2.12469	0	0.00567305	109	57	79902;8086;9818;22916;55677;55795;2733;26121;8106;6432;5976;91746;23144;53981;23381;53371;9887;22794;6428;11269;10212;23225;7175;29890;11338;7514;10250;26097;8683;4116;23293;23279;23165;348995;10482;26993;9295;6830;23511;3181;26019;8021;6430;8189;7248;6429;9984;7919;6426;23049;29072;4686;4927;5903;56647;9972;4928	ENSG00000005007;ENSG00000011243;ENSG00000014164;ENSG00000030066;ENSG00000047410;ENSG00000063244;ENSG00000070366;ENSG00000079134;ENSG00000082898;ENSG00000083896;ENSG00000094914;ENSG00000095319;ENSG00000100650;ENSG00000100836;ENSG00000105618;ENSG00000107949;ENSG00000108349;ENSG00000108559;ENSG00000109111;ENSG00000110713;ENSG00000111786;ENSG00000112081;ENSG00000114503;ENSG00000115875;ENSG00000116350…
GO:0071103	DNA conformation change	-0.303848	-2.10574	0	0.00603446	163	57	7156;51750;3006;29855;54623;1106;144108;146059;7175;4673;8467;1161;641;64061;1107;7994;22985;54892;4676;50809;4331;23347;26993;25842;6046;23064;7155;10664;25836;7150;3181;116447;6117;55506;23522;6594;4361;2074;254394;57680;4683;8260;257218;2071;1105;23063;1660;546;8520;23310;51773;7486;9555;23523;54617;79648;55870	ENSG00000006712;ENSG00000011243;ENSG00000020426;ENSG00000020922;ENSG00000047410;ENSG00000048649;ENSG00000049167;ENSG00000062650;ENSG00000077097;ENSG00000083168;ENSG00000085224;ENSG00000099284;ENSG00000099991;ENSG00000100813;ENSG00000100888;ENSG00000101596;ENSG00000102030;ENSG00000102038;ENSG00000102974;ENSG00000104320;ENSG00000107290;ENSG00000111875;ENSG00000111877;ENSG00000113648;ENSG00000116539…
GO:0006333	chromatin assembly or disassembly	-0.340693	-2.11038	0	0.00619052	95	37	196528;6602;3006;29855;6598;54623;9031;144108;146059;7175;4673;8467;64061;1107;7994;4676;50809;23347;25842;6046;10664;11011;55506;23522;6597;9219;257218;8289;55193;6601;6604;546;8520;55869;51773;9555;23523	ENSG00000006712;ENSG00000009954;ENSG00000047410;ENSG00000048649;ENSG00000066117;ENSG00000082014;ENSG00000083168;ENSG00000085224;ENSG00000099284;ENSG00000099956;ENSG00000099991;ENSG00000101596;ENSG00000102974;ENSG00000111875;ENSG00000113648;ENSG00000117713;ENSG00000118900;ENSG00000127483;ENSG00000127616;ENSG00000128708;ENSG00000139613;ENSG00000140326;ENSG00000146414;ENSG00000146872;ENSG00000147099…
GO:0000959	mitochondrial RNA metabolic process	0.454727	2.03256	0	0.00692802	38	27	79675;10128;51095;6832;25821;80222;201626;2617;60528;7019;57570;54931;54802;400916;130916;60493;80298;124454;55157;9238;81892;5442;57505;51067;64216;133522;84275	ENSG00000006744;ENSG00000043514;ENSG00000072756;ENSG00000099821;ENSG00000103356;ENSG00000106105;ENSG00000108064;ENSG00000117593;ENSG00000119705;ENSG00000120832;ENSG00000122085;ENSG00000124608;ENSG00000126814;ENSG00000135297;ENSG00000136270;ENSG00000138095;ENSG00000138399;ENSG00000139131;ENSG00000143374;ENSG00000155846;ENSG00000156502;ENSG00000162851;ENSG00000171612;ENSG00000174173;ENSG00000174840…
GO:0006354	DNA-templated transcription, elongation	-0.346152	-2.08462	0	0.00709298	89	38	5430;54623;26610;165918;8812;9150;23476;3150;6917;4331;4298;284695;123169;8518;902;6830;9646;3192;10771;79577;2967;2074;7936;2963;6829;2071;1025;904;55193;6749;9984;6924;7919;29072;4686;27125;8621;51755	ENSG00000006712;ENSG00000011007;ENSG00000015171;ENSG00000020426;ENSG00000060069;ENSG00000065883;ENSG00000070061;ENSG00000072364;ENSG00000079134;ENSG00000090061;ENSG00000109111;ENSG00000109911;ENSG00000111358;ENSG00000129315;ENSG00000130382;ENSG00000134371;ENSG00000134480;ENSG00000136807;ENSG00000136937;ENSG00000141867;ENSG00000149136;ENSG00000153187;ENSG00000162664;ENSG00000163161;ENSG00000163939…
GO:0006338	chromatin remodeling	-0.325055	-2.08945	0	0.00721676	113	44	81611;23198;6599;125476;6602;2186;11164;6598;9757;9031;144108;7175;8467;22955;6595;10467;8932;57459;55929;2648;56916;23347;9759;6830;7403;7150;6594;57680;60;5925;6597;9219;57492;8289;1105;55193;6601;11176;22890;6604;546;51773;54617;473	ENSG00000009954;ENSG00000010803;ENSG00000047410;ENSG00000048649;ENSG00000049618;ENSG00000066117;ENSG00000068024;ENSG00000068878;ENSG00000075624;ENSG00000076108;ENSG00000080503;ENSG00000082014;ENSG00000085224;ENSG00000099956;ENSG00000100888;ENSG00000101596;ENSG00000102038;ENSG00000106400;ENSG00000108773;ENSG00000109111;ENSG00000117713;ENSG00000126804;ENSG00000127616;ENSG00000128908;ENSG00000134046…
GO:1901998	toxin transport	0.449573	2.02092	0.00170068	0.00750084	35	16	22818;664;10574;535;6950;22948;7203;10694;10576;9364;3301;10575;23256;9276;55192;23428	ENSG00000033627;ENSG00000086061;ENSG00000092068;ENSG00000092108;ENSG00000104129;ENSG00000111481;ENSG00000115484;ENSG00000120438;ENSG00000135624;ENSG00000150753;ENSG00000156261;ENSG00000157869;ENSG00000163468;ENSG00000166226;ENSG00000176171;ENSG00000184432
GO:0009299	mRNA transcription	-0.528553	-2.07066	0.00219298	0.00758642	19	9	10114;2316;3297;6830;1655;22890;5469;405;7024	ENSG00000108654;ENSG00000109111;ENSG00000110422;ENSG00000125686;ENSG00000126804;ENSG00000135457;ENSG00000143437;ENSG00000185122;ENSG00000196924
GO:0006399	tRNA metabolic process	0.318131	1.99693	0	0.00859054	169	85	55140;3035;4677;16;131965;6301;9330;833;7453;2193;81627;55250;3376;23536;60487;116461;1653;63899;51095;5917;25821;2926;9836;80222;10056;23587;5393;8565;55278;79979;2617;51493;23438;80746;60528;6897;22929;7407;2058;10775;123263;23016;55699;6741;57570;127253;54931;91801;51637;5464;84881;27304;54802;51367;2972;9521;10978;9097;55621;92675;339487;285381;124454;25973;55157;79828;51504;10556;54517;64172…	ENSG00000006744;ENSG00000031698;ENSG00000043514;ENSG00000065457;ENSG00000066651;ENSG00000067704;ENSG00000072756;ENSG00000075914;ENSG00000079785;ENSG00000086475;ENSG00000087302;ENSG00000090861;ENSG00000091127;ENSG00000100220;ENSG00000100416;ENSG00000101557;ENSG00000103356;ENSG00000103707;ENSG00000104907;ENSG00000105171;ENSG00000105865;ENSG00000106105;ENSG00000110619;ENSG00000112855;ENSG00000113272…
GO:0071806	protein transmembrane transport	0.390515	1.99021	0.0017331	0.00860071	57	34	26520;80273;131118;5830;10452;5194;100287932;6731;9804;3312;29090;5193;55750;134266;5189;56993;55176;9868;9847;5191;6728;29928;92609;26517;23480;9409;26519;84134;10440;140823;5192;90580;133022;130617	ENSG00000006530;ENSG00000065665;ENSG00000075336;ENSG00000099800;ENSG00000100216;ENSG00000100575;ENSG00000105197;ENSG00000108733;ENSG00000109519;ENSG00000109971;ENSG00000111731;ENSG00000112357;ENSG00000121680;ENSG00000125995;ENSG00000127980;ENSG00000130204;ENSG00000132432;ENSG00000134375;ENSG00000134809;ENSG00000139197;ENSG00000142444;ENSG00000153037;ENSG00000154174;ENSG00000157911;ENSG00000158552…
GO:1902600	proton transmembrane transport	0.33598	1.99918	0	0.00875449	115	65	9550;1327;10476;515;5250;1355;26503;535;498;1537;539;27032;9167;374291;9114;11315;488;11261;30968;513;10479;133308;1353;51382;537;506;1183;1340;509;533;9377;6548;529;400916;476;9016;4891;523;27109;84277;526;1182;1528;1349;518;528;10105;1337;1345;10063;11182;1352;9551;51606;84679;478;1184;4697;522;56901;9605;206358;1347;9481;1351	ENSG00000006695;ENSG00000014919;ENSG00000017260;ENSG00000033627;ENSG00000047249;ENSG00000065923;ENSG00000071553;ENSG00000073464;ENSG00000075399;ENSG00000075415;ENSG00000090020;ENSG00000099624;ENSG00000100554;ENSG00000102078;ENSG00000105409;ENSG00000108179;ENSG00000109572;ENSG00000110911;ENSG00000110955;ENSG00000111775;ENSG00000112695;ENSG00000114573;ENSG00000115286;ENSG00000115944;ENSG00000116288…
GO:0051052	regulation of DNA metabolic process	-0.266988	-2.04635	0	0.00955525	312	117	409;54464;5154;64855;1763;5111;55704;3178;7374;84501;5976;219736;5514;80311;10533;2260;8243;23381;79618;7913;10155;51750;3006;84142;3725;9126;10039;2138;4437;63979;165918;146059;10728;10891;84464;7013;25970;4292;64710;641;64061;253980;7398;22976;64802;158880;5429;142;998;24144;80169;55226;8658;200558;8932;64210;23293;56916;55100;23347;10269;51010;5879;54537;3364;8239;11284;5394;3297;23244;6830;54…	ENSG00000005007;ENSG00000020922;ENSG00000039650;ENSG00000041880;ENSG00000062650;ENSG00000067369;ENSG00000069275;ENSG00000070366;ENSG00000070831;ENSG00000072501;ENSG00000076242;ENSG00000076248;ENSG00000077782;ENSG00000079134;ENSG00000080345;ENSG00000082068;ENSG00000084073;ENSG00000085224;ENSG00000087206;ENSG00000096717;ENSG00000100109;ENSG00000101596;ENSG00000104313;ENSG00000104320;ENSG00000104517…
GO:0032984	protein-containing complex disassembly	0.283665	1.96959	0	0.00992759	277	130	3831;9793;11198;140775;664;29979;7415;65008;327;1072;7818;54534;51650;26100;23122;5018;64963;146057;51318;28998;28977;51510;63894;7251;8562;830;51021;78988;65082;6059;25851;10490;124995;55173;3312;56945;90480;11222;2580;9553;29767;6683;53918;2107;65080;23271;2932;51649;157922;219402;9617;79142;4528;51534;50810;64601;91782;64965;28973;50861;60488;89927;23107;27243;5499;84305;136319;26284;54460;271…	ENSG00000009844;ENSG00000021574;ENSG00000040633;ENSG00000048544;ENSG00000061794;ENSG00000073969;ENSG00000074071;ENSG00000074319;ENSG00000082701;ENSG00000083937;ENSG00000085760;ENSG00000086065;ENSG00000086504;ENSG00000090263;ENSG00000092201;ENSG00000096080;ENSG00000100568;ENSG00000101460;ENSG00000104231;ENSG00000104435;ENSG00000105402;ENSG00000105447;ENSG00000105887;ENSG00000108826;ENSG00000109971…
GO:0044782	cilium organization	-0.263628	-2.0299	0	0.0104763	339	164	123016;5819;197335;25776;55582;26074;79989;55742;115106;7320;80210;55722;8382;79140;91147;9662;29070;49856;23224;582;989;80127;4750;23102;9696;54777;9814;89891;1069;3064;26123;51715;2622;84747;347240;583;23216;50807;55755;54801;4867;23116;55835;6738;755;257177;1781;11020;54919;116840;27077;585;57787;83874;51259;4957;54903;55704;353116;56912;3983;11064;9702;167691;57539;261734;22858;64792;65062;11…	ENSG00000007047;ENSG00000011143;ENSG00000011454;ENSG00000046651;ENSG00000048342;ENSG00000052841;ENSG00000054282;ENSG00000054611;ENSG00000054654;ENSG00000058453;ENSG00000065882;ENSG00000067208;ENSG00000070367;ENSG00000074054;ENSG00000076201;ENSG00000077380;ENSG00000078674;ENSG00000079805;ENSG00000080298;ENSG00000083312;ENSG00000083535;ENSG00000089101;ENSG00000094631;ENSG00000096872;ENSG00000099204…
GO:0072350	tricarboxylic acid metabolic process	0.44478	1.94538	0.00323625	0.0118543	33	21	1743;4967;1737;3419;2271;5160;55753;3658;8802;5162;8803;4191;4190;6390;6389;3420;10873;3421;6392;81889;3417	ENSG00000014641;ENSG00000067829;ENSG00000073578;ENSG00000091483;ENSG00000101365;ENSG00000105953;ENSG00000117118;ENSG00000119689;ENSG00000131828;ENSG00000136143;ENSG00000136381;ENSG00000138413;ENSG00000146701;ENSG00000150768;ENSG00000151376;ENSG00000163541;ENSG00000166411;ENSG00000168291;ENSG00000180185;ENSG00000197444;ENSG00000204370
GO:0032259	methylation	-0.267467	-2.00912	0	0.0119764	266	106	11107;84444;254013;220074;55818;2146;55039;1787;54888;56339;55677;56257;24140;63977;64855;54880;54496;79872;23067;29104;3275;23091;80745;10155;3006;63892;6598;9757;151194;54623;94104;4302;56254;55729;387893;4552;79066;51611;8493;29890;23476;22976;26097;142;58508;5252;51742;79813;8932;55929;55251;10269;4548;63925;10664;51111;10196;84274;8473;79918;6830;7403;26053;9646;221656;80204;10919;8726;3720;…	ENSG00000005483;ENSG00000006712;ENSG00000008083;ENSG00000032219;ENSG00000037474;ENSG00000054267;ENSG00000055609;ENSG00000066135;ENSG00000068438;ENSG00000074266;ENSG00000076108;ENSG00000080345;ENSG00000084073;ENSG00000085224;ENSG00000096717;ENSG00000099956;ENSG00000102974;ENSG00000103037;ENSG00000103342;ENSG00000104885;ENSG00000105202;ENSG00000105879;ENSG00000106462;ENSG00000107077;ENSG00000107614…
GO:0048284	organelle fusion	0.323613	1.93872	0	0.0120489	107	36	80124;374986;9927;54471;8615;664;10059;23673;10939;57617;84079;4976;81554;10490;9554;56947;27072;23339;54927;54332;64601;84895;8674;30968;9570;55823;27183;84286;7405;84749;10228;9482;5071;9847;23355;79594	ENSG00000006715;ENSG00000087470;ENSG00000090432;ENSG00000100335;ENSG00000100568;ENSG00000104142;ENSG00000104381;ENSG00000105186;ENSG00000106554;ENSG00000108433;ENSG00000111731;ENSG00000116688;ENSG00000117533;ENSG00000117758;ENSG00000127419;ENSG00000132612;ENSG00000135093;ENSG00000135823;ENSG00000138768;ENSG00000141385;ENSG00000148343;ENSG00000156931;ENSG00000160695;ENSG00000165283;ENSG00000166887…
GO:0031123	RNA 3'-end processing	-0.312133	-2.00389	0	0.0121209	117	50	25896;8106;6432;23144;53981;23404;203522;22794;6428;54623;56254;10212;11338;54973;10250;26097;55656;8683;4116;26173;23318;51010;123169;9295;3297;51585;9646;87178;79577;9810;7936;6430;8189;6829;1025;904;6429;9984;79670;7919;2091;11052;79869;6426;25962;4686;79882;10914;22828;26512	ENSG00000006712;ENSG00000014164;ENSG00000063244;ENSG00000079134;ENSG00000083223;ENSG00000090060;ENSG00000100650;ENSG00000100722;ENSG00000100836;ENSG00000102786;ENSG00000103549;ENSG00000105202;ENSG00000107371;ENSG00000108349;ENSG00000111605;ENSG00000111786;ENSG00000112081;ENSG00000115875;ENSG00000116350;ENSG00000116754;ENSG00000123136;ENSG00000125755;ENSG00000127054;ENSG00000129315;ENSG00000130713…
GO:0070988	demethylation	-0.37813	-1.98694	0	0.0140637	46	16	23030;8239;5927;7403;10765;221656;3720;54790;221037;80853;23081;22992;9682;51780;54726;200424	ENSG00000006459;ENSG00000008083;ENSG00000066135;ENSG00000073614;ENSG00000107077;ENSG00000117139;ENSG00000120733;ENSG00000124486;ENSG00000127663;ENSG00000147050;ENSG00000164164;ENSG00000165097;ENSG00000168769;ENSG00000171988;ENSG00000173120;ENSG00000187605
GO:0016197	endosomal transport	0.302353	1.91418	0	0.0142718	186	77	2060;54497;10043;23163;5870;55737;7415;1130;1213;8027;23484;84079;84661;400;137492;51552;81609;65009;7251;8766;9372;8723;9784;10490;10890;9827;282991;8729;10139;23339;29886;11021;1639;64145;64601;91782;757;63893;10652;8674;26000;9648;27243;23585;9570;55353;55745;27183;56850;84910;10228;9559;9525;57679;55610;5071;51028;6643;57132;112936;51271;55658;6836;738;128866;5119;6293;9201;55773;55004;6653;1…	ENSG00000003393;ENSG00000004766;ENSG00000006740;ENSG00000008869;ENSG00000036054;ENSG00000053770;ENSG00000068400;ENSG00000069329;ENSG00000070423;ENSG00000074319;ENSG00000083937;ENSG00000084733;ENSG00000085832;ENSG00000100284;ENSG00000100568;ENSG00000101246;ENSG00000101421;ENSG00000103034;ENSG00000103769;ENSG00000104341;ENSG00000104660;ENSG00000105186;ENSG00000106266;ENSG00000106636;ENSG00000107185…
GO:0071824	protein-DNA complex subunit organization	-0.283394	-1.95889	0	0.016945	169	67	9328;6666;4678;9349;7508;81611;7316;23198;6599;6882;196528;6602;3006;29855;6598;54623;55729;144108;7013;4673;8467;64061;7343;7994;142;1642;7507;51112;10467;4676;50809;4331;25842;6046;10664;5705;902;6830;6117;55506;23522;2967;5925;6597;257218;8289;2071;9013;55193;7067;6601;6879;9014;11176;7311;1385;23126;29072;26054;6604;546;8520;51773;55814;9555;23523;54617	ENSG00000006712;ENSG00000020426;ENSG00000048649;ENSG00000064995;ENSG00000066117;ENSG00000068878;ENSG00000076108;ENSG00000082014;ENSG00000083168;ENSG00000085224;ENSG00000087191;ENSG00000099284;ENSG00000099956;ENSG00000099991;ENSG00000102974;ENSG00000103168;ENSG00000106400;ENSG00000108312;ENSG00000109111;ENSG00000111358;ENSG00000111875;ENSG00000112701;ENSG00000113648;ENSG00000115750;ENSG00000117713…
GO:0019080	viral gene expression	-0.363648	-1.95333	0.00253807	0.0171502	53	24	1939;8665;6882;81559;8661;10206;6598;3725;64710;9150;8664;7392;5725;23076;6597;23435;1105;1025;904;5094;2033;1660;8662;51773	ENSG00000011304;ENSG00000048649;ENSG00000060069;ENSG00000064995;ENSG00000069275;ENSG00000099956;ENSG00000100353;ENSG00000100393;ENSG00000105698;ENSG00000106263;ENSG00000107581;ENSG00000120948;ENSG00000127616;ENSG00000129315;ENSG00000135829;ENSG00000136807;ENSG00000143486;ENSG00000153922;ENSG00000154370;ENSG00000160208;ENSG00000175390;ENSG00000177606;ENSG00000197111;ENSG00000204977
GO:1904837	beta-catenin-TCF complex assembly	-0.443773	-1.94086	0.002331	0.0175674	27	12	7088;7090;283149;123169;1387;607;79577;10524;6597;8295;8085;2033	ENSG00000005339;ENSG00000100393;ENSG00000116128;ENSG00000127616;ENSG00000134371;ENSG00000140332;ENSG00000166477;ENSG00000167548;ENSG00000172977;ENSG00000186174;ENSG00000196367;ENSG00000196781
GO:0009141	nucleoside triphosphate metabolic process	0.276713	1.88605	0	0.0177278	253	106	1327;50484;4715;4719;7385;5315;10476;515;4967;10059;5213;7415;481;1355;9512;10243;4976;55967;498;1537;539;1854;4436;3312;9167;7384;3098;4711;637;5230;246269;4694;4720;4717;65018;5214;55753;1716;374291;4704;4700;201626;4716;51103;65220;11315;2026;4723;4338;669;30968;51727;513;2821;4722;1503;4705;4713;55270;93974;8802;506;9054;509;3704;5901;8604;4714;790;27089;9377;4702;29789;27304;4710;3939;1738;4…	ENSG00000008130;ENSG00000010256;ENSG00000014919;ENSG00000015475;ENSG00000023228;ENSG00000028839;ENSG00000048392;ENSG00000065518;ENSG00000067057;ENSG00000067225;ENSG00000073578;ENSG00000078237;ENSG00000079739;ENSG00000084774;ENSG00000087470;ENSG00000091140;ENSG00000095002;ENSG00000099624;ENSG00000099795;ENSG00000102144;ENSG00000105220;ENSG00000105819;ENSG00000105953;ENSG00000108179;ENSG00000109390…
GO:0021915	neural tube development	-0.29926	-1.9422	0	0.0177978	133	78	2736;80199;8323;8985;8321;57619;55081;23648;57216;6297;655;6664;5754;5629;9839;5727;7289;54910;3091;8642;7408;5916;4524;5310;5663;23242;5080;84678;6788;65979;10395;585;6201;23513;54903;57534;25;7474;5914;2737;5898;4040;7042;84314;7189;1856;26146;79600;57545;23654;6659;9585;51684;1857;57728;2648;8915;6497;10427;23322;9968;5311;7403;9742;7249;2909;4522;55764;200894;26160;8289;7248;221322;317;29072;…	ENSG00000004975;ENSG00000006451;ENSG00000007372;ENSG00000008710;ENSG00000010361;ENSG00000011143;ENSG00000048342;ENSG00000070018;ENSG00000074047;ENSG00000078246;ENSG00000080815;ENSG00000089094;ENSG00000092969;ENSG00000097007;ENSG00000100644;ENSG00000100714;ENSG00000101109;ENSG00000101144;ENSG00000101752;ENSG00000103197;ENSG00000103494;ENSG00000104375;ENSG00000106078;ENSG00000106397;ENSG00000106571…
GO:0048706	embryonic skeletal system development	-0.338448	-1.93352	0	0.0179075	69	25	1739;860;5156;55959;54903;7474;2737;5125;6935;57453;2138;57728;9968;55112;25836;9742;50515;4522;54799;3340;5087;29072;4087;6670;23169	ENSG00000011143;ENSG00000011258;ENSG00000070614;ENSG00000075711;ENSG00000099139;ENSG00000100714;ENSG00000104313;ENSG00000106571;ENSG00000114251;ENSG00000116704;ENSG00000124813;ENSG00000126870;ENSG00000134853;ENSG00000148516;ENSG00000157796;ENSG00000164190;ENSG00000171310;ENSG00000172845;ENSG00000175387;ENSG00000177103;ENSG00000181555;ENSG00000184634;ENSG00000185630;ENSG00000187535;ENSG00000196562
GO:0070646	protein modification by small protein removal	0.27641	1.87814	0	0.0179187	244	76	80124;9861;59343;57478;9491;5707;10197;5709;8678;80013;5887;23326;7874;7415;8027;10208;23172;205564;64854;8464;5704;5689;23032;4287;51616;56943;5716;5684;5710;10868;10869;55593;5718;5708;51377;57599;5717;9100;50813;9804;5423;10213;5706;5690;8237;55432;54764;8533;10987;5713;2873;5720;83737;55288;5886;8078;9733;11315;51633;5695;7345;5701;64708;84749;5685;10445;85015;1861;329;5700;5071;1540;5693;569…	ENSG00000008018;ENSG00000013275;ENSG00000019995;ENSG00000041357;ENSG00000066427;ENSG00000068308;ENSG00000070501;ENSG00000075856;ENSG00000077254;ENSG00000078747;ENSG00000083799;ENSG00000092010;ENSG00000100519;ENSG00000100567;ENSG00000100764;ENSG00000100804;ENSG00000101843;ENSG00000102226;ENSG00000103035;ENSG00000103194;ENSG00000103404;ENSG00000108344;ENSG00000108671;ENSG00000109189;ENSG00000110330…
GO:0006457	protein folding	0.295995	1.87944	0	0.0183083	173	80	80273;55831;55768;908;267;5824;5887;7415;7266;134492;9403;131118;9218;10574;10294;120526;6950;22948;7203;10961;9526;9093;23386;3312;79982;5034;11140;2580;80331;5201;7265;23065;10856;2770;79139;11328;134266;10694;10576;10471;51645;30001;79608;3301;10575;3326;6449;79031;10130;1861;5700;2288;4802;26278;573;134218;9049;6782;3313;5481;10131;10450;27000;3320;10681;22824;51182;51035;1047;5082;6903;10105…	ENSG00000004478;ENSG00000015676;ENSG00000066136;ENSG00000069345;ENSG00000069966;ENSG00000080824;ENSG00000084072;ENSG00000086061;ENSG00000088356;ENSG00000089248;ENSG00000096384;ENSG00000100764;ENSG00000101132;ENSG00000101152;ENSG00000101558;ENSG00000103423;ENSG00000104969;ENSG00000105401;ENSG00000105821;ENSG00000107262;ENSG00000108179;ENSG00000109519;ENSG00000109971;ENSG00000110711;ENSG00000113013…
GO:0032527	protein exit from endoplasmic reticulum	0.407014	1.86579	0.00707965	0.0190049	41	21	27248;10134;6400;7415;56681;23197;55754;55432;79139;550;9648;9777;6396;10956;51465;6836;51128;6653;10113;258010;54732	ENSG00000068912;ENSG00000071537;ENSG00000079332;ENSG00000101337;ENSG00000112697;ENSG00000113194;ENSG00000115307;ENSG00000135506;ENSG00000135968;ENSG00000136986;ENSG00000137642;ENSG00000138073;ENSG00000148248;ENSG00000152700;ENSG00000157020;ENSG00000165280;ENSG00000180667;ENSG00000184840;ENSG00000185825;ENSG00000198168;ENSG00000198833
GO:0016050	vesicle organization	0.271869	1.86581	0	0.019618	260	98	5869;2060;84364;64400;5861;9217;5537;57403;8615;23673;10175;1130;23317;8027;56681;9218;57617;84079;10484;5048;137492;51552;10564;1173;51510;59349;7251;8766;164;10490;22872;9554;282991;64083;8729;27095;9632;27072;8976;10959;23339;26258;26052;51534;55654;64601;91782;3267;8674;81876;89781;27243;9570;55353;55823;27183;84286;7405;375056;10228;375;9525;23256;9482;57679;5071;9847;51028;6396;57132;23355;…	ENSG00000003393;ENSG00000006715;ENSG00000007168;ENSG00000009844;ENSG00000054116;ENSG00000074319;ENSG00000079332;ENSG00000079950;ENSG00000083937;ENSG00000085832;ENSG00000086065;ENSG00000086598;ENSG00000092108;ENSG00000100099;ENSG00000100528;ENSG00000100568;ENSG00000100934;ENSG00000101421;ENSG00000101558;ENSG00000103769;ENSG00000104142;ENSG00000104164;ENSG00000104341;ENSG00000105186;ENSG00000105402…
GO:0070584	mitochondrion morphogenesis	0.494715	1.84222	0.00343643	0.022819	19	8	598;10059;4976;10087;6742;6832;80025;56947	ENSG00000087470;ENSG00000106028;ENSG00000113163;ENSG00000125779;ENSG00000156502;ENSG00000168958;ENSG00000171552;ENSG00000198836
GO:0010256	endomembrane system organization	0.259623	1.83824	0	0.023013	337	104	5869;80124;22930;22931;23208;64400;80856;5861;9217;128989;25782;9631;57142;57403;8615;83548;10059;23592;1130;23317;54828;8027;51308;23122;54808;9218;10565;23136;57617;10484;400;5048;11235;10087;137492;55161;10564;5862;26003;51510;7251;8766;22796;60684;10890;255919;282991;64083;2580;6683;8729;23423;25839;10133;115548;8976;23271;10959;81565;6647;57531;51534;55654;1639;64145;91782;3267;22878;8674;48…	ENSG00000003393;ENSG00000007168;ENSG00000009844;ENSG00000021574;ENSG00000062716;ENSG00000066777;ENSG00000068615;ENSG00000074319;ENSG00000082397;ENSG00000084733;ENSG00000085382;ENSG00000086065;ENSG00000086598;ENSG00000087470;ENSG00000088833;ENSG00000099246;ENSG00000100934;ENSG00000101421;ENSG00000101558;ENSG00000102178;ENSG00000103051;ENSG00000103769;ENSG00000104142;ENSG00000104341;ENSG00000104388…
GO:0036230	granulocyte activation	0.261904	1.83335	0	0.0232379	323	103	5869;25852;9861;22931;5707;5036;10043;5315;5709;5870;11333;7415;327;1432;23317;10970;51646;9522;9218;1508;55832;5049;23197;5689;29099;535;51552;2547;55754;4758;56888;3608;7520;5718;5708;5717;10159;51143;10890;3312;25801;4048;10213;1509;2720;10120;80331;387921;10092;387263;5713;3163;10097;94103;8649;51719;10694;10487;10576;5695;5799;80142;5701;127829;4893;84514;5834;2821;1315;3074;51382;3326;961;2…	ENSG00000001561;ENSG00000008018;ENSG00000014216;ENSG00000033627;ENSG00000038002;ENSG00000049860;ENSG00000057608;ENSG00000058063;ENSG00000067225;ENSG00000079246;ENSG00000080824;ENSG00000084072;ENSG00000084733;ENSG00000085365;ENSG00000096384;ENSG00000099246;ENSG00000100030;ENSG00000100284;ENSG00000100554;ENSG00000100994;ENSG00000101152;ENSG00000101558;ENSG00000101856;ENSG00000103035;ENSG00000103415…
GO:0072665	protein localization to vacuole	0.378793	1.82408	0.00509338	0.0233929	50	20	30849;23163;8678;4074;55187;10490;9475;3312;23230;8031;22878;9648;10542;9570;27183;64089;84572;144577;51028;26985	ENSG00000003056;ENSG00000048707;ENSG00000090581;ENSG00000100568;ENSG00000104497;ENSG00000108433;ENSG00000109971;ENSG00000125447;ENSG00000126581;ENSG00000132612;ENSG00000134248;ENSG00000134318;ENSG00000135968;ENSG00000136100;ENSG00000153339;ENSG00000174206;ENSG00000185009;ENSG00000196455;ENSG00000197969;ENSG00000266412
GO:0002446	neutrophil mediated immunity	0.260416	1.81683	0	0.0236263	324	103	5869;25852;9861;22931;5707;5036;10043;5315;5709;5870;11333;7415;327;1432;23317;10970;51646;9522;9218;1508;55832;5049;23197;5689;29099;535;51552;2547;55754;4758;56888;3608;7520;5718;5708;5717;10159;51143;10890;3312;25801;4048;10213;1509;2720;10120;80331;387921;10092;387263;5713;3163;10097;94103;8649;51719;10694;10487;10576;5695;5799;80142;5701;127829;4893;84514;5834;2821;1315;3074;51382;3326;961;2…	ENSG00000001561;ENSG00000008018;ENSG00000014216;ENSG00000033627;ENSG00000038002;ENSG00000049860;ENSG00000057608;ENSG00000058063;ENSG00000067225;ENSG00000079246;ENSG00000080824;ENSG00000084072;ENSG00000084733;ENSG00000085365;ENSG00000096384;ENSG00000099246;ENSG00000100030;ENSG00000100284;ENSG00000100554;ENSG00000100994;ENSG00000101152;ENSG00000101558;ENSG00000101856;ENSG00000103035;ENSG00000103415…
GO:0009259	ribonucleotide metabolic process	0.251913	1.82607	0	0.0236342	403	161	8833;2181;1327;5538;4715;1743;4719;7385;5315;10476;515;4967;10059;5213;7415;481;1355;9512;57546;137964;1737;10243;4976;4354;55967;498;1537;8050;54928;539;4436;8460;3312;51292;9167;7384;80025;3098;4711;637;5230;246269;55711;4694;4720;4717;139596;65018;5214;5160;55753;374291;4704;4700;201626;79621;4716;10005;79646;51103;65220;11315;38;2026;4723;4338;669;31;30968;51727;5471;513;7378;2821;4722;1503;1…	ENSG00000005469;ENSG00000005882;ENSG00000008130;ENSG00000010256;ENSG00000014919;ENSG00000015475;ENSG00000023228;ENSG00000035687;ENSG00000061918;ENSG00000064763;ENSG00000065518;ENSG00000067057;ENSG00000067225;ENSG00000068366;ENSG00000073578;ENSG00000075239;ENSG00000078237;ENSG00000078295;ENSG00000079739;ENSG00000081026;ENSG00000084774;ENSG00000087470;ENSG00000091140;ENSG00000094841;ENSG00000095002…
GO:0006605	protein targeting	0.255696	1.81715	0	0.0242287	336	116	9472;9927;26520;80273;9270;30849;7385;1121;64429;54471;5824;9520;665;9512;131118;8504;4074;28972;10531;5830;55187;10452;2664;5194;100287932;6731;10490;55146;9804;4924;55825;3312;29090;25813;4358;1384;3265;56947;11140;8540;23230;637;9747;5193;219743;3308;5621;65018;55750;8031;6235;3416;54332;134266;10005;6138;11154;5189;340481;89781;51763;9648;11261;55625;56993;9570;23463;55176;55823;5264;27183;64…	ENSG00000003056;ENSG00000005469;ENSG00000006530;ENSG00000015475;ENSG00000018510;ENSG00000023041;ENSG00000034693;ENSG00000048707;ENSG00000065665;ENSG00000075336;ENSG00000080824;ENSG00000081014;ENSG00000090581;ENSG00000095321;ENSG00000099800;ENSG00000100099;ENSG00000100216;ENSG00000100335;ENSG00000100347;ENSG00000100478;ENSG00000100568;ENSG00000100575;ENSG00000101421;ENSG00000101473;ENSG00000104381…
GO:0045930	negative regulation of mitotic cell cycle	-0.262481	-1.88349	0	0.0246812	203	80	694;123879;7027;197342;8738;55755;348654;10217;1263;7077;11170;1739;10106;2146;29997;80198;23513;10950;55795;25;5111;6154;7508;4194;3550;5514;596;3275;26058;146691;835;79960;55031;2273;4849;7175;55743;6659;25949;641;2619;5933;5885;9125;8658;5934;3364;7155;5311;10201;4848;87178;79577;1112;4361;4683;5591;5925;9183;8260;4193;79027;2956;90806;9344;51347;2033;7756;65123;25904;324;57551;546;9863;85456;…	ENSG00000010244;ENSG00000020922;ENSG00000022267;ENSG00000035862;ENSG00000047410;ENSG00000053254;ENSG00000072609;ENSG00000075711;ENSG00000077097;ENSG00000077684;ENSG00000080802;ENSG00000080839;ENSG00000085224;ENSG00000086827;ENSG00000088038;ENSG00000097007;ENSG00000100393;ENSG00000102030;ENSG00000103479;ENSG00000104320;ENSG00000105373;ENSG00000106144;ENSG00000106462;ENSG00000111596;ENSG00000113141…
GO:0034976	response to endoplasmic reticulum stress	0.27012	1.80875	0	0.0247454	231	83	153222;27248;9354;10299;440275;10134;10955;598;9217;6400;267;160418;8893;29979;4189;7415;80267;23197;4976;4287;10087;55161;26003;2673;10869;26608;468;10961;10525;5526;22872;5034;5706;201595;55432;2932;79139;550;10987;387923;2907;1639;11236;29978;51283;9114;11315;488;9570;23392;30001;2135;1965;10211;7993;79876;6449;10130;1861;11253;5071;10273;6396;10956;51465;10488;8720;26232;55738;4690;2137;5516;…	ENSG00000012174;ENSG00000012232;ENSG00000066427;ENSG00000068912;ENSG00000068971;ENSG00000071537;ENSG00000078140;ENSG00000081307;ENSG00000082701;ENSG00000089248;ENSG00000100519;ENSG00000101199;ENSG00000101557;ENSG00000103266;ENSG00000103429;ENSG00000104691;ENSG00000104695;ENSG00000104969;ENSG00000106638;ENSG00000107175;ENSG00000108433;ENSG00000109133;ENSG00000110344;ENSG00000113163;ENSG00000113194…
GO:0030522	intracellular receptor signaling pathway	-0.256309	-1.8756	0	0.0248004	231	80	55818;2146;29997;6256;409;6095;285464;55128;200845;5914;7337;7316;90268;9862;23586;3275;1488;10454;10521;79039;7189;5970;171023;10891;63906;8767;865;811;23118;9667;6502;6397;55252;142;9612;23054;9125;8611;10902;1390;55666;8896;387;9968;29966;26065;6294;4848;51366;8202;7181;1655;10524;5925;6597;57658;8289;8085;84498;7067;6879;26057;9325;9969;2033;7311;10013;23411;8312;7329;8805;8648;5469;6885;9611…	ENSG00000008838;ENSG00000012822;ENSG00000054118;ENSG00000055208;ENSG00000055917;ENSG00000067113;ENSG00000067560;ENSG00000067955;ENSG00000069667;ENSG00000084676;ENSG00000094631;ENSG00000095794;ENSG00000096717;ENSG00000100201;ENSG00000100324;ENSG00000100393;ENSG00000103126;ENSG00000103275;ENSG00000103671;ENSG00000104312;ENSG00000104517;ENSG00000105373;ENSG00000106245;ENSG00000106462;ENSG00000107201…
GO:0006403	RNA localization	-0.2597	-1.87828	0	0.0249589	201	86	79902;8086;9818;22916;55677;55795;2733;3178;26121;8106;6432;5976;91746;5813;23144;23299;54680;53981;23404;23381;53371;55421;9887;64901;22794;6428;11269;10212;23225;7175;7013;29890;11338;65110;7514;10250;51602;26097;23039;8683;8658;24148;4116;23293;23279;23165;348995;10482;51010;6421;26993;9295;5394;3297;6830;23511;64062;3181;3192;87178;26019;8021;6430;8189;7248;6429;9984;7919;2091;11052;6426;2304…	ENSG00000005007;ENSG00000011243;ENSG00000014164;ENSG00000030066;ENSG00000047410;ENSG00000055044;ENSG00000063244;ENSG00000070366;ENSG00000074356;ENSG00000079134;ENSG00000082898;ENSG00000083896;ENSG00000088247;ENSG00000094914;ENSG00000095319;ENSG00000100650;ENSG00000100836;ENSG00000101161;ENSG00000105202;ENSG00000105618;ENSG00000107371;ENSG00000107949;ENSG00000108349;ENSG00000108559;ENSG00000109111…
GO:0045454	cell redox homeostasis	0.366067	1.80472	0.00511073	0.0251104	54	23	79770;9352;51075;2936;328;56255;7001;57544;23341;5034;10539;54495;51714;80142;30001;10190;10130;2745;114112;7296;5768;51218;1738	ENSG00000087301;ENSG00000091140;ENSG00000091164;ENSG00000100823;ENSG00000104687;ENSG00000108010;ENSG00000113621;ENSG00000115514;ENSG00000116138;ENSG00000116260;ENSG00000125827;ENSG00000143870;ENSG00000148334;ENSG00000166479;ENSG00000167815;ENSG00000173221;ENSG00000182512;ENSG00000185624;ENSG00000197763;ENSG00000197930;ENSG00000198431;ENSG00000198843;ENSG00000213593
GO:0006360	transcription by RNA polymerase I	-0.344057	-1.88434	0	0.0253447	56	23	4691;9015;6598;221830;2316;84172;7343;9451;4331;10269;902;55506;2967;2074;6597;2071;25926;9013;9014;11176;5469;55127;9555	ENSG00000020426;ENSG00000076108;ENSG00000084073;ENSG00000099284;ENSG00000099956;ENSG00000103168;ENSG00000105849;ENSG00000108312;ENSG00000111358;ENSG00000113648;ENSG00000115053;ENSG00000115750;ENSG00000119285;ENSG00000125630;ENSG00000125686;ENSG00000127616;ENSG00000130935;ENSG00000134480;ENSG00000143498;ENSG00000163161;ENSG00000172071;ENSG00000196924;ENSG00000225830
GO:0010586	miRNA metabolic process	-0.42144	-1.86237	0.00234742	0.0264008	26	11	23318;4790;129563;192670;87178;149041;26523;79670;29102;27161;8570	ENSG00000083223;ENSG00000088247;ENSG00000092847;ENSG00000109320;ENSG00000113360;ENSG00000123908;ENSG00000134698;ENSG00000134744;ENSG00000135870;ENSG00000138035;ENSG00000144535
GO:0035148	tube formation	-0.296338	-1.86298	0	0.0269657	112	64	80199;8323;8321;2263;57619;55081;57216;655;6664;5754;5629;9839;5727;7289;54910;3091;7408;5916;4524;23242;84678;6788;65979;10395;585;6201;10018;23513;54903;57534;25;7474;5914;5898;4040;7042;7189;1856;79600;57545;23654;10806;6659;9585;80184;51684;1857;2648;8915;6497;10427;9968;7403;7249;2909;4522;55764;26160;8289;7248;317;29072;4781;6789	ENSG00000004975;ENSG00000006451;ENSG00000010361;ENSG00000011143;ENSG00000048342;ENSG00000054282;ENSG00000066468;ENSG00000070018;ENSG00000078246;ENSG00000089094;ENSG00000092969;ENSG00000097007;ENSG00000100644;ENSG00000100714;ENSG00000101109;ENSG00000101144;ENSG00000101752;ENSG00000103197;ENSG00000104375;ENSG00000106078;ENSG00000107882;ENSG00000108773;ENSG00000112655;ENSG00000114251;ENSG00000114446…
GO:0045023	G0 to G1 transition	-0.371027	-1.84687	0.00757576	0.02867	40	17	4194;1911;23468;84108;23269;79813;5932;80012;6015;10919;8726;317;23512;80314;5469;23429;7029	ENSG00000074266;ENSG00000094916;ENSG00000101773;ENSG00000111752;ENSG00000114126;ENSG00000120616;ENSG00000120868;ENSG00000125686;ENSG00000156374;ENSG00000163602;ENSG00000173889;ENSG00000174197;ENSG00000178691;ENSG00000181090;ENSG00000198625;ENSG00000204227;ENSG00000204371
GO:0009123	nucleoside monophosphate metabolic process	0.260261	1.78497	0	0.0294326	263	105	8833;1327;4715;4719;7385;5315;10476;515;4967;10059;5213;7415;481;1355;9512;4354;1635;55967;498;1537;539;1854;4436;3312;51292;9167;7384;3098;4711;637;5230;246269;4694;4720;4717;139596;65018;5214;55753;1716;374291;4704;4700;201626;4716;51103;65220;11315;2026;4723;669;30968;51727;5471;513;7378;2821;4722;159;4705;4713;93974;506;1633;509;53343;8604;4714;790;27089;9377;4702;29789;10606;4710;84618;3939;…	ENSG00000008130;ENSG00000010256;ENSG00000014919;ENSG00000015475;ENSG00000023228;ENSG00000035687;ENSG00000065518;ENSG00000067057;ENSG00000067225;ENSG00000073578;ENSG00000078237;ENSG00000079739;ENSG00000081026;ENSG00000084774;ENSG00000087470;ENSG00000091140;ENSG00000094841;ENSG00000095002;ENSG00000099624;ENSG00000099795;ENSG00000100938;ENSG00000102144;ENSG00000105220;ENSG00000105819;ENSG00000105953…
GO:0099132	ATP hydrolysis coupled cation transmembrane transport	0.373475	1.77213	0.0141093	0.0310362	44	27	10476;515;535;498;539;27032;9114;488;513;537;506;509;533;529;23400;476;523;526;10396;518;528;493;492;491;51606;490;478	ENSG00000017260;ENSG00000033627;ENSG00000047249;ENSG00000058668;ENSG00000067842;ENSG00000070961;ENSG00000071553;ENSG00000099624;ENSG00000105409;ENSG00000110955;ENSG00000114573;ENSG00000116459;ENSG00000117410;ENSG00000124406;ENSG00000131100;ENSG00000147416;ENSG00000152234;ENSG00000154518;ENSG00000155097;ENSG00000157087;ENSG00000159363;ENSG00000159720;ENSG00000163399;ENSG00000165629;ENSG00000167863…
GO:0033865	nucleoside bisphosphate metabolic process	0.305702	1.77272	0	0.0316383	102	50	2181;5538;1743;4967;57546;137964;1737;8050;54928;8460;80025;55711;5160;10005;79646;38;31;55856;8802;5162;55229;8803;6785;9061;51000;8459;4598;79071;54677;1738;84693;2182;79717;11332;25874;53354;3157;9060;201562;84836;10380;55902;5164;2194;54995;5165;4597;9200;25830;23305	ENSG00000005469;ENSG00000005882;ENSG00000064763;ENSG00000067992;ENSG00000068366;ENSG00000075239;ENSG00000091140;ENSG00000097021;ENSG00000101473;ENSG00000104331;ENSG00000105953;ENSG00000110435;ENSG00000110921;ENSG00000112304;ENSG00000112972;ENSG00000114779;ENSG00000118402;ENSG00000119689;ENSG00000120137;ENSG00000123983;ENSG00000124370;ENSG00000124786;ENSG00000125779;ENSG00000127125;ENSG00000128294…
GO:0015931	nucleobase-containing compound transport	-0.253668	-1.82479	0	0.0325653	198	80	79902;8086;9818;22916;9197;55677;55795;2733;3178;8106;6432;5976;91746;5813;23144;23299;53981;23381;53371;55421;9887;64901;22794;6428;11269;10212;23225;7175;29890;11338;65110;7514;10250;26097;23039;8683;8658;4116;23293;23279;23165;348995;10482;6421;26993;9295;3297;6830;23511;64062;23443;3181;3192;87178;26019;8021;6430;8189;7248;6429;9984;8737;7919;11052;6426;23049;1660;29072;25909;4686;4927;5903;2…	ENSG00000005007;ENSG00000011243;ENSG00000014164;ENSG00000030066;ENSG00000047410;ENSG00000063244;ENSG00000070366;ENSG00000074356;ENSG00000079134;ENSG00000082898;ENSG00000083896;ENSG00000088247;ENSG00000094914;ENSG00000095319;ENSG00000100650;ENSG00000100836;ENSG00000107949;ENSG00000108349;ENSG00000108559;ENSG00000109111;ENSG00000110713;ENSG00000111605;ENSG00000111786;ENSG00000112081;ENSG00000114503…
GO:0051656	establishment of organelle localization	0.24017	1.75534	0	0.0334437	411	145	56907;22930;55153;64149;9371;23208;84364;5861;5036;5537;10540;8615;5870;8678;10059;10175;23636;23122;56681;57617;10484;5048;11235;4976;29058;11127;10128;22820;51510;22920;59349;8766;150465;6059;8723;283489;9581;5868;22872;9554;8697;282991;80179;6683;8729;27095;80331;9632;8976;65018;51164;2932;10959;81565;118426;26258;26052;10097;1639;55288;91782;10652;10947;81876;7345;488;2332;27243;9570;27183;56…	ENSG00000007168;ENSG00000021574;ENSG00000034053;ENSG00000036054;ENSG00000047621;ENSG00000054116;ENSG00000067606;ENSG00000068400;ENSG00000070087;ENSG00000070540;ENSG00000070718;ENSG00000071553;ENSG00000075945;ENSG00000079332;ENSG00000079616;ENSG00000079841;ENSG00000081803;ENSG00000082701;ENSG00000083937;ENSG00000085415;ENSG00000086065;ENSG00000086598;ENSG00000087470;ENSG00000088833;ENSG00000089063…
GO:0016999	antibiotic metabolic process	0.318456	1.75711	0.00494234	0.0337293	80	39	1743;10020;4967;1737;3419;7001;132789;84869;2271;65018;5160;55753;6647;3658;10007;11315;25902;128;8802;5162;8803;4191;4190;6390;6389;55907;3420;2098;219;6770;10935;10873;231;3421;6392;55902;81889;3417;25824	ENSG00000014641;ENSG00000067829;ENSG00000073578;ENSG00000085662;ENSG00000091483;ENSG00000101365;ENSG00000105953;ENSG00000111726;ENSG00000113552;ENSG00000116288;ENSG00000117118;ENSG00000119689;ENSG00000120254;ENSG00000126432;ENSG00000131069;ENSG00000131828;ENSG00000136143;ENSG00000136381;ENSG00000137124;ENSG00000138413;ENSG00000139684;ENSG00000142168;ENSG00000145439;ENSG00000146701;ENSG00000147465…
GO:0051646	mitochondrion localization	0.374206	1.74224	0.0134228	0.0353134	38	20	9927;10059;4976;10128;80179;6683;55288;7345;79594;55638;4139;4137;120892;55669;7314;4131;8409;4747;85300;23277	ENSG00000021574;ENSG00000087470;ENSG00000090432;ENSG00000116141;ENSG00000116688;ENSG00000126756;ENSG00000126858;ENSG00000131711;ENSG00000132361;ENSG00000138095;ENSG00000147642;ENSG00000154277;ENSG00000167654;ENSG00000170315;ENSG00000171109;ENSG00000186868;ENSG00000188906;ENSG00000198836;ENSG00000277586;ENSG00000278259
GO:0017038	protein import	0.27405	1.74233	0	0.0360648	172	53	23534;3840;23633;26520;80273;10204;11331;84455;9631;1434;3839;5824;1432;23636;131118;8504;5830;10073;3717;10452;3836;5194;100287932;55746;9804;3312;29090;25813;4763;5193;3308;55750;134266;10527;55705;55696;9221;5189;51517;11261;56993;3326;3837;51194;5191;26953;29928;8882;5901;8720;8841;1894;92609	ENSG00000006530;ENSG00000025800;ENSG00000034693;ENSG00000064419;ENSG00000069248;ENSG00000075336;ENSG00000086200;ENSG00000086589;ENSG00000096384;ENSG00000096968;ENSG00000100216;ENSG00000100347;ENSG00000100575;ENSG00000102753;ENSG00000102898;ENSG00000105197;ENSG00000108424;ENSG00000108733;ENSG00000109519;ENSG00000109917;ENSG00000109971;ENSG00000112062;ENSG00000112357;ENSG00000113569;ENSG00000114030…
GO:0009451	RNA modification	0.2845	1.73294	0.00151515	0.0373391	130	68	55140;16;131965;26995;81627;8731;115939;55250;79068;60487;63899;9589;25821;23070;9836;23587;5073;221120;79979;285367;54890;22929;196074;51106;123263;6741;114049;57570;127253;55651;96764;54931;91801;64783;27292;84881;27304;54802;1736;55621;130916;57721;285381;113802;27037;79828;51504;54517;154743;64172;142940;113000;55687;81605;11062;54974;54920;51002;91893;57505;84705;55178;64216;54522;54859;104;…	ENSG00000007376;ENSG00000007520;ENSG00000029639;ENSG00000043514;ENSG00000066651;ENSG00000071462;ENSG00000086189;ENSG00000086475;ENSG00000090861;ENSG00000091127;ENSG00000091542;ENSG00000099899;ENSG00000100416;ENSG00000100601;ENSG00000101654;ENSG00000103707;ENSG00000104907;ENSG00000105865;ENSG00000113272;ENSG00000121486;ENSG00000122085;ENSG00000123600;ENSG00000124217;ENSG00000124608;ENSG00000126814…
GO:1904888	cranial skeletal system development	-0.371012	-1.80307	0.00501253	0.0380747	39	18	51715;157506;158326;860;5156;2737;7042;285590;57728;9968;25836;9742;50515;4522;1112;3340;29072;4087	ENSG00000053254;ENSG00000070614;ENSG00000092969;ENSG00000100714;ENSG00000106571;ENSG00000112210;ENSG00000121039;ENSG00000124813;ENSG00000134853;ENSG00000157796;ENSG00000164190;ENSG00000164946;ENSG00000171310;ENSG00000174705;ENSG00000175387;ENSG00000181555;ENSG00000184634;ENSG00000187535
GO:0060976	coronary vasculature development	-0.372742	-1.79365	0.00982801	0.038713	36	15	7423;6722;5125;10454;196528;1785;7049;51684;10427;6444;3340;7541;161742;29072;65250	ENSG00000069702;ENSG00000070614;ENSG00000079805;ENSG00000099139;ENSG00000100324;ENSG00000107882;ENSG00000112658;ENSG00000138802;ENSG00000166068;ENSG00000170624;ENSG00000173511;ENSG00000181555;ENSG00000189079;ENSG00000197603;ENSG00000198081
GO:0043171	peptide catabolic process	0.466528	1.72606	0.0228873	0.0388426	19	6	9520;4012;7511;4048;3416;51752	ENSG00000108039;ENSG00000111144;ENSG00000113441;ENSG00000119912;ENSG00000141279;ENSG00000164307
GO:0098781	ncRNA transcription	-0.286699	-1.77726	0	0.0392115	97	43	29997;22916;55726;9328;25896;51547;6882;4691;6598;5430;79664;51593;2976;8812;54973;84172;57117;112495;23379;6621;5451;55656;7702;26173;129685;55506;2961;58490;92105;6597;2963;79871;2975;1025;2957;904;25926;9014;65123;4686;9555;26512;23248	ENSG00000064102;ENSG00000064995;ENSG00000077235;ENSG00000087087;ENSG00000090061;ENSG00000099284;ENSG00000099956;ENSG00000101413;ENSG00000102786;ENSG00000105373;ENSG00000113648;ENSG00000114503;ENSG00000115053;ENSG00000115207;ENSG00000115750;ENSG00000122484;ENSG00000125630;ENSG00000127054;ENSG00000127616;ENSG00000128915;ENSG00000129315;ENSG00000130935;ENSG00000136807;ENSG00000136937;ENSG00000137413…
GO:0042770	signal transduction in response to DNA damage	-0.290173	-1.79392	0	0.0394273	103	29	4849;8444;387893;6659;51343;8493;22976;9125;5934;10269;1859;4848;4683;1655;10524;5591;4193;51720;2033;23411;161742;25904;546;85456;23019;57472;4850;7029;64844	ENSG00000080802;ENSG00000084073;ENSG00000085224;ENSG00000087206;ENSG00000088038;ENSG00000096717;ENSG00000100393;ENSG00000103479;ENSG00000104320;ENSG00000105325;ENSG00000108654;ENSG00000111596;ENSG00000113300;ENSG00000114126;ENSG00000124766;ENSG00000125107;ENSG00000135679;ENSG00000136536;ENSG00000143479;ENSG00000144580;ENSG00000149115;ENSG00000157212;ENSG00000157540;ENSG00000166068;ENSG00000170836…
GO:0016482	cytosolic transport	0.278915	1.71955	0.00597907	0.0398545	142	56	2060;64400;54497;5870;55737;8678;23317;29934;1213;84079;400;51552;55297;27252;164;10490;5868;9827;2580;8729;23230;10139;29886;10097;1639;64145;63893;10652;26000;9648;9980;23033;9570;55823;64089;84910;10228;9559;9482;55610;55435;5071;6643;112936;55638;55658;6836;738;8724;6293;160;55773;8898;6653;5605;120892	ENSG00000004766;ENSG00000008869;ENSG00000036054;ENSG00000069329;ENSG00000070423;ENSG00000076321;ENSG00000083097;ENSG00000085832;ENSG00000087053;ENSG00000100568;ENSG00000101246;ENSG00000104497;ENSG00000105186;ENSG00000106266;ENSG00000106636;ENSG00000107185;ENSG00000107862;ENSG00000108433;ENSG00000112335;ENSG00000119396;ENSG00000120805;ENSG00000122958;ENSG00000123106;ENSG00000126581;ENSG00000126934…
GO:0061383	trabecula morphogenesis	-0.365677	-1.77785	0.005	0.0398928	41	29	140706;9241;30061;23493;6422;55636;26585;4851;4313;1901;5364;7010;2022;655;2201;22904;10507;3516;57493;6722;7042;657;7059;7049;54583;10277;387;6654;5469	ENSG00000064932;ENSG00000067560;ENSG00000069702;ENSG00000087245;ENSG00000092969;ENSG00000101144;ENSG00000101331;ENSG00000104332;ENSG00000106991;ENSG00000107779;ENSG00000112658;ENSG00000115904;ENSG00000120156;ENSG00000125686;ENSG00000130939;ENSG00000135547;ENSG00000135766;ENSG00000138449;ENSG00000138829;ENSG00000148400;ENSG00000164050;ENSG00000166923;ENSG00000168214;ENSG00000169231;ENSG00000170989…
GO:0006302	double-strand break repair	-0.253211	-1.77885	0	0.0404508	182	57	7913;51750;125150;84142;54840;79913;10039;2138;63979;165918;84464;51444;4292;64710;641;22976;158880;10519;142;24144;5885;200558;64210;56916;55100;23137;23347;5932;6421;54537;3364;23064;3297;25836;5422;6117;4361;51366;254394;4683;10524;5591;2140;9320;51720;9112;7468;29072;254225;23503;55183;22992;7158;85456;79677;7486;54617	ENSG00000020922;ENSG00000041880;ENSG00000067369;ENSG00000069275;ENSG00000072121;ENSG00000076242;ENSG00000080345;ENSG00000082068;ENSG00000087206;ENSG00000100109;ENSG00000101442;ENSG00000101596;ENSG00000101773;ENSG00000101868;ENSG00000104313;ENSG00000104320;ENSG00000104517;ENSG00000107290;ENSG00000109685;ENSG00000111877;ENSG00000116560;ENSG00000122376;ENSG00000124795;ENSG00000128908;ENSG00000132383…
GO:0036344	platelet morphogenesis	-0.463973	-1.78318	0.0105485	0.0411329	17	10	5781;842;836;29071;6722;10519;23218;4627;2033;9948	ENSG00000071127;ENSG00000100345;ENSG00000100393;ENSG00000112658;ENSG00000132906;ENSG00000160796;ENSG00000164305;ENSG00000171155;ENSG00000179295;ENSG00000185043
GO:0006260	DNA replication	-0.245686	-1.77932	0	0.0411875	219	76	4172;4678;222229;1763;5111;55704;5976;5813;10533;2260;5937;201973;8243;7156;51750;163859;5981;3725;4784;9126;4437;146059;84464;7013;4673;64710;641;64061;253980;5429;998;80169;23054;51426;3978;10269;5932;5879;3364;11284;11201;23244;5422;7150;114799;116447;6117;10919;5980;4361;254394;4683;10524;1025;79892;259282;466;23063;6749;2956;9984;26057;51455;84289;5558;1660;546;5930;57695;25942;84268;22944;4…	ENSG00000005007;ENSG00000008441;ENSG00000009413;ENSG00000020922;ENSG00000035928;ENSG00000038219;ENSG00000039650;ENSG00000062650;ENSG00000069275;ENSG00000070831;ENSG00000072501;ENSG00000077782;ENSG00000079134;ENSG00000084073;ENSG00000085224;ENSG00000101751;ENSG00000101773;ENSG00000101868;ENSG00000104320;ENSG00000105486;ENSG00000108055;ENSG00000110713;ENSG00000111877;ENSG00000112118;ENSG00000113318…
GO:0033013	tetrapyrrole metabolic process	0.369412	1.71269	0.0119454	0.0412942	41	17	326625;27102;1355;51522;644;211;4779;25974;3163;27249;3658;93974;2235;7390;7389;8803;645	ENSG00000014919;ENSG00000023330;ENSG00000066926;ENSG00000082641;ENSG00000086232;ENSG00000090013;ENSG00000103415;ENSG00000106605;ENSG00000111843;ENSG00000126088;ENSG00000130770;ENSG00000132763;ENSG00000136143;ENSG00000136381;ENSG00000139428;ENSG00000168288;ENSG00000188690
GO:0042440	pigment metabolic process	0.365995	1.70815	0.0052356	0.0420275	42	19	8833;1355;51522;644;211;4779;3163;3658;5471;25902;93974;2235;7390;7389;645;9693;10606;7220;4891	ENSG00000014919;ENSG00000023330;ENSG00000066926;ENSG00000082641;ENSG00000090013;ENSG00000103415;ENSG00000106605;ENSG00000109756;ENSG00000110911;ENSG00000111843;ENSG00000120254;ENSG00000126088;ENSG00000128050;ENSG00000128059;ENSG00000130770;ENSG00000136381;ENSG00000144935;ENSG00000163655;ENSG00000188690
GO:0022613	ribonucleoprotein complex biogenesis	-0.222581	-1.75899	0	0.0432776	388	133	26121;10528;10146;51077;1939;1207;91746;10658;1654;25879;54680;8665;55035;27316;84916;81875;23404;10521;5562;79707;6187;6128;9045;8661;317781;27340;23451;9129;153443;6155;22889;55027;192669;9188;10728;79066;55661;8568;51118;51575;3646;84864;7514;64434;10713;6838;220064;51602;25929;51001;10171;10291;8664;55226;8683;23517;10594;24148;29889;6147;11273;57602;51010;26065;129563;23064;84294;57647;51747…	ENSG00000001497;ENSG00000003756;ENSG00000007392;ENSG00000039123;ENSG00000055044;ENSG00000055483;ENSG00000055917;ENSG00000061936;ENSG00000066654;ENSG00000074201;ENSG00000082516;ENSG00000082898;ENSG00000083896;ENSG00000087263;ENSG00000087269;ENSG00000088930;ENSG00000089009;ENSG00000089048;ENSG00000092847;ENSG00000096717;ENSG00000099995;ENSG00000100201;ENSG00000100316;ENSG00000100353;ENSG00000100650…
GO:0002200	somatic diversification of immune receptors	-0.341036	-1.75976	0	0.044012	46	17	165918;4292;22976;200558;3978;23075;51010;54537;6830;9730;4683;5591;2956;9984;7468;55183;7158	ENSG00000067369;ENSG00000076242;ENSG00000079134;ENSG00000080345;ENSG00000104320;ENSG00000105486;ENSG00000107371;ENSG00000109111;ENSG00000109685;ENSG00000116062;ENSG00000122376;ENSG00000133789;ENSG00000145041;ENSG00000157212;ENSG00000163961;ENSG00000169621;ENSG00000253729
GO:0031503	protein-containing complex localization	-0.238603	-1.75293	0	0.0447696	246	102	51068;4983;9903;1739;11020;79902;8086;9818;22916;23513;55677;23557;55795;9211;2733;56912;8106;6432;5976;167691;57539;91746;22858;64792;5813;23144;112752;53981;9321;5906;23381;53371;9887;79809;1785;79659;2239;22794;6428;55333;26146;5108;8943;1740;11269;10212;23225;7175;7013;11336;29890;11338;7514;10250;1605;201134;3842;26097;23059;28981;8683;4116;23293;57728;23279;23165;348995;10482;6421;26993;929…	ENSG00000005007;ENSG00000011243;ENSG00000014164;ENSG00000030066;ENSG00000047410;ENSG00000063244;ENSG00000065000;ENSG00000070366;ENSG00000075711;ENSG00000076716;ENSG00000078674;ENSG00000079134;ENSG00000079482;ENSG00000079805;ENSG00000082898;ENSG00000083312;ENSG00000083896;ENSG00000094914;ENSG00000095319;ENSG00000096872;ENSG00000100360;ENSG00000100650;ENSG00000100815;ENSG00000100836;ENSG00000103351…
GO:0010608	posttranscriptional regulation of gene expression	-0.219896	-1.72843	0	0.0520867	400	142	6256;22916;56339;54464;79753;6169;55795;8569;1982;6154;2733;5914;5611;7316;6191;5976;1801;91746;8087;10658;1654;5813;64410;1979;9782;9811;2872;23404;26058;23381;23178;9887;22794;10600;4691;9669;5430;92715;85451;51593;192669;5511;4849;7175;57669;1994;79066;51611;51654;6659;811;48;27327;3646;1938;5610;65110;7514;55095;79048;3842;7072;25929;9612;9451;132864;9147;23367;8664;9125;10949;4116;23293;2613…	ENSG00000005007;ENSG00000015479;ENSG00000047410;ENSG00000054118;ENSG00000055332;ENSG00000055917;ENSG00000066044;ENSG00000067248;ENSG00000067560;ENSG00000070366;ENSG00000078687;ENSG00000079277;ENSG00000082516;ENSG00000082898;ENSG00000083223;ENSG00000083312;ENSG00000083896;ENSG00000084073;ENSG00000087087;ENSG00000087263;ENSG00000088038;ENSG00000088247;ENSG00000089154;ENSG00000090621;ENSG00000090905…
GO:0048568	embryonic organ development	-0.227354	-1.71937	0	0.0535558	280	77	1739;585;5426;860;5156;23513;5154;6169;54903;57534;7474;5914;2737;6722;219736;5125;4040;7042;2260;6935;196528;57453;2186;10155;129880;657;1856;26146;54806;2138;57545;204851;25949;80184;613;55084;51684;10818;8932;54583;57448;57728;10427;9968;55112;51057;3297;5311;25836;7403;9742;50515;6434;22846;4522;55764;90;207;200894;26160;8289;2071;26259;3340;4297;10049;5087;29072;10019;4087;6670;8648;5930;546…	ENSG00000004975;ENSG00000011143;ENSG00000048342;ENSG00000070018;ENSG00000070614;ENSG00000071246;ENSG00000075711;ENSG00000077782;ENSG00000084676;ENSG00000092969;ENSG00000099139;ENSG00000100714;ENSG00000101109;ENSG00000101752;ENSG00000104313;ENSG00000105993;ENSG00000106571;ENSG00000107779;ENSG00000107882;ENSG00000111252;ENSG00000112320;ENSG00000112658;ENSG00000114251;ENSG00000115170;ENSG00000115760…
GO:0006298	mismatch repair	-0.423544	-1.71186	0.012285	0.0539944	21	12	25;5111;7508;4437;27030;4292;5378;3978;6117;254394;2956;29072	ENSG00000064933;ENSG00000076242;ENSG00000097007;ENSG00000105486;ENSG00000111877;ENSG00000113318;ENSG00000116062;ENSG00000119684;ENSG00000132383;ENSG00000132646;ENSG00000154767;ENSG00000181555
GO:0061512	protein localization to cilium	-0.346262	-1.71449	0.0121359	0.0540984	41	26	7289;79989;582;9696;2622;9727;585;56995;55704;57539;84314;79809;92482;1453;26088;79600;57545;285331;10807;9742;27241;55764;200894;221322;22873;65250	ENSG00000048342;ENSG00000058453;ENSG00000078246;ENSG00000090565;ENSG00000100083;ENSG00000105948;ENSG00000115355;ENSG00000118965;ENSG00000122507;ENSG00000123607;ENSG00000130338;ENSG00000134874;ENSG00000140463;ENSG00000141013;ENSG00000141551;ENSG00000146350;ENSG00000163913;ENSG00000165689;ENSG00000169379;ENSG00000174483;ENSG00000179029;ENSG00000180376;ENSG00000187535;ENSG00000197603;ENSG00000204852…
GO:0071826	ribonucleoprotein complex subunit organization	-0.241621	-1.71992	0	0.0542382	214	76	54496;26121;10146;1939;1207;91746;10658;1654;54680;8665;27316;5562;6128;8661;23451;9129;22889;192669;8444;10728;3646;10713;25929;51001;24144;10291;8664;8683;10594;24148;6147;11273;26065;23064;51747;6433;1656;192670;103;4848;55692;55239;79577;219988;1659;51340;6430;92399;149041;80153;26523;23195;10181;79631;7536;6122;7919;10772;11052;79869;6426;1660;23020;27161;4686;8662;7375;55015;255967;6311;909…	ENSG00000003756;ENSG00000007392;ENSG00000055917;ENSG00000061936;ENSG00000067596;ENSG00000074201;ENSG00000082516;ENSG00000083896;ENSG00000087263;ENSG00000089009;ENSG00000092847;ENSG00000099995;ENSG00000100109;ENSG00000100316;ENSG00000100353;ENSG00000100650;ENSG00000101161;ENSG00000101343;ENSG00000104408;ENSG00000105618;ENSG00000106263;ENSG00000107290;ENSG00000107581;ENSG00000108848;ENSG00000110367…
GO:0009755	hormone-mediated signaling pathway	-0.24481	-1.70801	0	0.0545605	181	44	10891;865;811;7182;9667;6502;11214;142;9612;23054;9125;8611;8896;387;9968;29966;6294;4848;51366;8202;7181;1655;10524;5925;6597;57658;8289;8085;7067;6879;9325;9969;2033;10013;23411;8312;7329;8648;5469;9611;23019;9282;9967;9113	ENSG00000012822;ENSG00000054118;ENSG00000067113;ENSG00000067560;ENSG00000067955;ENSG00000084676;ENSG00000094631;ENSG00000096717;ENSG00000100393;ENSG00000103126;ENSG00000103275;ENSG00000103671;ENSG00000104517;ENSG00000106245;ENSG00000108510;ENSG00000108654;ENSG00000109819;ENSG00000111596;ENSG00000117713;ENSG00000120798;ENSG00000124151;ENSG00000125107;ENSG00000125686;ENSG00000126351;ENSG00000127616…
GO:0048009	insulin-like growth factor receptor signaling pathway	-0.408764	-1.68511	0.0162037	0.0629734	24	11	3488;51232;2887;26058;55023;64599;9451;7249;3482;207;3480	ENSG00000103197;ENSG00000106070;ENSG00000115461;ENSG00000140443;ENSG00000142208;ENSG00000146247;ENSG00000146830;ENSG00000150938;ENSG00000172071;ENSG00000197081;ENSG00000204120
GO:0006289	nucleotide-excision repair	0.287813	1.65041	0.00802568	0.0637283	99	42	3980;252969;5433;8450;5887;7874;2073;27339;91603;5434;4287;5432;10463;2072;50813;5423;5440;5431;8533;10987;2873;5886;5437;9978;64708;2965;54778;8451;3981;85015;10920;404672;2068;5982;2067;9318;27343;10450;10980;7314;4913;51138	ENSG00000005156;ENSG00000012061;ENSG00000014824;ENSG00000047315;ENSG00000049541;ENSG00000065057;ENSG00000066427;ENSG00000070501;ENSG00000084072;ENSG00000099817;ENSG00000100387;ENSG00000102978;ENSG00000104884;ENSG00000110107;ENSG00000110768;ENSG00000111652;ENSG00000119318;ENSG00000121022;ENSG00000123552;ENSG00000134899;ENSG00000138663;ENSG00000139842;ENSG00000141030;ENSG00000144231;ENSG00000144524…
GO:0048736	appendage development	-0.257865	-1.67461	0.00547945	0.0637487	129	84	4920;9241;23657;1749;642658;55636;51176;26585;5396;4487;494470;221833;51776;4851;27164;6662;6926;658;578;6299;2736;8850;8323;64093;2263;7483;3655;3065;65057;4038;4621;655;6664;79583;7704;2201;5727;444;7289;1889;84133;5916;2768;51222;5663;157506;27077;860;10018;54903;7474;5914;2737;5125;4040;7042;2260;84314;83999;657;26146;6659;57728;2648;6497;23322;51057;1387;25836;9742;50515;55764;26160;221322;4…	ENSG00000005339;ENSG00000011143;ENSG00000030110;ENSG00000066468;ENSG00000070018;ENSG00000074047;ENSG00000077782;ENSG00000078246;ENSG00000080815;ENSG00000085224;ENSG00000091409;ENSG00000091436;ENSG00000092969;ENSG00000099139;ENSG00000101144;ENSG00000102977;ENSG00000103449;ENSG00000103494;ENSG00000105880;ENSG00000106571;ENSG00000107779;ENSG00000107829;ENSG00000108641;ENSG00000108773;ENSG00000109063…
GO:0007224	smoothened signaling pathway	-0.259791	-1.6805	0.00280899	0.063923	116	43	55835;6738;91653;11020;27077;860;8445;6095;54903;23295;200845;56912;2737;22856;79809;222663;26146;55717;79600;8643;57545;204851;2619;9231;28981;51684;57540;57728;23322;27148;51057;1387;9742;55764;5925;200894;26160;3340;221322;9786;22873;27152;26005	ENSG00000005339;ENSG00000011143;ENSG00000048342;ENSG00000069667;ENSG00000070614;ENSG00000100360;ENSG00000100578;ENSG00000102858;ENSG00000103494;ENSG00000106571;ENSG00000107882;ENSG00000108641;ENSG00000116747;ENSG00000117425;ENSG00000118096;ENSG00000120008;ENSG00000122970;ENSG00000123607;ENSG00000124813;ENSG00000127334;ENSG00000131873;ENSG00000134874;ENSG00000138002;ENSG00000139687;ENSG00000143951…
GO:0048536	spleen development	-0.424023	-1.6707	0.0167064	0.0643142	21	11	10018;55795;25;596;6868;5585;80169;3720;5591;149041;5087	ENSG00000008083;ENSG00000097007;ENSG00000123143;ENSG00000126226;ENSG00000135870;ENSG00000151694;ENSG00000153094;ENSG00000171791;ENSG00000178971;ENSG00000185630;ENSG00000253729
GO:0001963	synaptic transmission, dopaminergic	0.446551	1.65105	0.0108499	0.0644591	18	6	25953;65018;11315;10211;1861;5071	ENSG00000116288;ENSG00000127838;ENSG00000136827;ENSG00000137312;ENSG00000158828;ENSG00000185345
GO:0006310	DNA recombination	-0.232736	-1.67496	0	0.0646219	195	56	51750;125150;3006;79913;4437;63979;165918;27030;84464;51444;4292;64710;641;22976;158880;142;5885;23054;200558;64210;56916;23137;3978;23347;23075;5932;51010;6421;54537;3364;23064;7155;4798;6830;25836;23304;6117;4361;9730;254394;4683;5591;2071;2956;9984;7468;29072;23503;55183;84268;7158;54891;22944;79677;7486;54617	ENSG00000020922;ENSG00000024048;ENSG00000067369;ENSG00000069275;ENSG00000072121;ENSG00000076242;ENSG00000077097;ENSG00000079134;ENSG00000080345;ENSG00000101442;ENSG00000101596;ENSG00000101773;ENSG00000104320;ENSG00000105486;ENSG00000107290;ENSG00000107371;ENSG00000109111;ENSG00000109685;ENSG00000111877;ENSG00000113318;ENSG00000114933;ENSG00000116062;ENSG00000116560;ENSG00000119684;ENSG00000122376…
GO:0072331	signal transduction by p53 class mediator	-0.244041	-1.66741	0.00296736	0.064995	171	45	83860;4849;8444;387893;23368;6659;8493;204851;22976;7994;6874;51741;7917;9125;6873;5934;10269;8148;1859;4848;10614;54971;4683;1655;10524;207;4193;133746;6749;6879;84289;2033;23411;161742;25904;8805;546;23378;85456;23019;10210;57472;4850;7029;64844	ENSG00000064313;ENSG00000080802;ENSG00000083168;ENSG00000084073;ENSG00000085224;ENSG00000088038;ENSG00000088808;ENSG00000096717;ENSG00000100393;ENSG00000103479;ENSG00000104320;ENSG00000108654;ENSG00000111596;ENSG00000113300;ENSG00000114126;ENSG00000122779;ENSG00000124766;ENSG00000125107;ENSG00000130699;ENSG00000132275;ENSG00000135679;ENSG00000136536;ENSG00000142208;ENSG00000143479;ENSG00000144580…
GO:0015949	nucleobase-containing small molecule interconversion	0.429994	1.65151	0.0291595	0.0654349	21	11	2936;1635;1854;51292;51727;1503;2745;7296;1841;4830;2987	ENSG00000100938;ENSG00000104687;ENSG00000128951;ENSG00000129187;ENSG00000143774;ENSG00000162368;ENSG00000168393;ENSG00000171793;ENSG00000173221;ENSG00000198431;ENSG00000239672
GO:0006352	DNA-templated transcription, initiation	-0.233521	-1.67538	0	0.0654762	194	54	9015;6598;5430;3725;83860;55729;221830;10891;8467;865;8493;7182;9794;22976;84172;2969;7343;6874;23054;4331;6873;9968;23064;1387;5705;902;8148;171568;2961;2967;7181;6597;7596;2963;2071;2975;1025;2957;26036;9013;7067;6879;9014;9439;11176;9969;1385;5469;9774;51773;4204;9282;55814;9967	ENSG00000005339;ENSG00000020426;ENSG00000029363;ENSG00000048649;ENSG00000054118;ENSG00000064313;ENSG00000067955;ENSG00000076108;ENSG00000077235;ENSG00000087191;ENSG00000099956;ENSG00000100413;ENSG00000103168;ENSG00000105849;ENSG00000107290;ENSG00000108312;ENSG00000108510;ENSG00000109819;ENSG00000111358;ENSG00000112200;ENSG00000112282;ENSG00000115750;ENSG00000118260;ENSG00000120798;ENSG00000124459…
GO:0042157	lipoprotein metabolic process	0.289078	1.64375	0.00629921	0.065784	99	44	5494;22930;5538;54965;25782;64429;10026;9397;2822;26100;9140;55146;26090;25921;4836;340481;94005;55625;84287;284098;55054;5283;10434;8813;11152;56270;23390;9474;51304;258010;84945;93183;55733;55062;128869;51604;55650;81926;11313;51104;84243;64840;158866;2629	ENSG00000000419;ENSG00000011009;ENSG00000023041;ENSG00000054392;ENSG00000057663;ENSG00000060642;ENSG00000070540;ENSG00000085978;ENSG00000087111;ENSG00000100564;ENSG00000100614;ENSG00000100997;ENSG00000101464;ENSG00000102312;ENSG00000102383;ENSG00000107362;ENSG00000112293;ENSG00000115839;ENSG00000118873;ENSG00000120992;ENSG00000124155;ENSG00000129968;ENSG00000131238;ENSG00000136247;ENSG00000136448…
GO:0051169	nuclear transport	-0.218045	-1.66169	0	0.066525	290	105	26263;79902;8086;9818;54960;54535;22916;55677;55795;2733;9349;3178;2737;8106;9702;6432;5976;91746;5514;10892;23144;30000;53981;23381;53371;9887;10155;64901;22794;6428;55027;11269;10212;23225;7175;2010;2316;811;29890;11338;65110;7514;10250;3842;11214;26097;25929;80824;51684;23039;9147;8683;55929;4116;23293;23279;23165;348995;10482;26993;9295;2621;6830;23511;5784;64062;64328;7249;3181;51366;26019;8…	ENSG00000005007;ENSG00000011243;ENSG00000014164;ENSG00000030066;ENSG00000031823;ENSG00000046647;ENSG00000047410;ENSG00000063244;ENSG00000070366;ENSG00000079134;ENSG00000082516;ENSG00000082898;ENSG00000083312;ENSG00000083896;ENSG00000094914;ENSG00000095319;ENSG00000096717;ENSG00000100650;ENSG00000100836;ENSG00000102119;ENSG00000103197;ENSG00000104517;ENSG00000105576;ENSG00000106571;ENSG00000107882…
GO:0051648	vesicle localization	0.236126	1.63046	0	0.0712935	272	113	22930;64149;9371;23208;84364;5861;5537;10540;8615;10059;10175;23122;56681;57617;10484;5048;29058;11127;22920;59349;8766;65082;9581;5868;22872;9554;282991;8729;27095;80331;9632;8976;65018;2932;10959;81565;26258;26052;10652;10947;81876;488;2332;9570;56850;375;23256;1861;55435;5071;84961;673;26985;6396;9900;55638;2157;10239;22871;55686;84984;1176;27445;1778;83696;84100;90411;149111;51128;55773;1780;…	ENSG00000007168;ENSG00000034053;ENSG00000036054;ENSG00000054116;ENSG00000067606;ENSG00000068400;ENSG00000070087;ENSG00000070540;ENSG00000070718;ENSG00000073969;ENSG00000075945;ENSG00000079332;ENSG00000079841;ENSG00000081803;ENSG00000082701;ENSG00000086598;ENSG00000087470;ENSG00000089063;ENSG00000092108;ENSG00000100528;ENSG00000100934;ENSG00000101152;ENSG00000101298;ENSG00000101350;ENSG00000102003…
GO:0010821	regulation of mitochondrion organization	0.260182	1.61877	0.00302572	0.0717868	152	54	9927;598;3980;54471;55737;664;10059;9520;665;23259;55187;4976;5716;292;56947;64083;11140;80179;637;10133;65018;2932;80821;7416;4836;55288;11315;65084;89781;30968;55823;84749;28978;10193;26355;5071;93974;79594;4137;6721;9776;10055;7529;23400;400916;10456;118424;120892;54708;10971;57103;51024;25994;5599	ENSG00000005022;ENSG00000005156;ENSG00000015475;ENSG00000048707;ENSG00000069329;ENSG00000078237;ENSG00000082701;ENSG00000085788;ENSG00000087470;ENSG00000090432;ENSG00000096092;ENSG00000100099;ENSG00000100335;ENSG00000100523;ENSG00000101843;ENSG00000104765;ENSG00000105401;ENSG00000107643;ENSG00000113384;ENSG00000114023;ENSG00000116288;ENSG00000116688;ENSG00000123240;ENSG00000126858;ENSG00000130770…
GO:0034067	protein localization to Golgi apparatus	0.409552	1.62077	0.0301508	0.0719246	25	11	5870;400;55187;64083;2580;8729;23230;10133;10139;9648;152559	ENSG00000048707;ENSG00000101246;ENSG00000107862;ENSG00000113384;ENSG00000120805;ENSG00000123240;ENSG00000135968;ENSG00000163291;ENSG00000175582;ENSG00000178950;ENSG00000197969
GO:0098876	vesicle-mediated transport to the plasma membrane	0.293704	1.62305	0.00821018	0.0720067	84	27	403;2181;23163;55737;57120;84079;10564;81609;55770;8766;9784;55763;10890;64083;10133;9135;10139;23339;378;373;8674;9648;56850;375;9559;10434;57020	ENSG00000029725;ENSG00000047932;ENSG00000068400;ENSG00000069329;ENSG00000084733;ENSG00000090989;ENSG00000101246;ENSG00000103544;ENSG00000103769;ENSG00000105186;ENSG00000112685;ENSG00000113384;ENSG00000113595;ENSG00000115234;ENSG00000117533;ENSG00000120992;ENSG00000122958;ENSG00000123240;ENSG00000123983;ENSG00000124198;ENSG00000125447;ENSG00000135968;ENSG00000138175;ENSG00000143376;ENSG00000143761…
GO:0061025	membrane fusion	0.269012	1.62374	0.00156986	0.0727778	112	52	80124;310;8615;10059;23673;9218;57617;84079;4976;81554;10490;9554;25801;27072;9135;23339;57531;64601;10652;8674;11261;9570;55823;27183;84286;7405;10228;9482;8774;9847;23355;55968;8417;5877;9392;9882;55669;25978;8775;22999;10815;6843;4905;6860;137886;10814;6844;54734;26276;116841;5864;6809	ENSG00000006715;ENSG00000029725;ENSG00000073969;ENSG00000079841;ENSG00000079950;ENSG00000083937;ENSG00000085382;ENSG00000087470;ENSG00000088833;ENSG00000100568;ENSG00000101558;ENSG00000104142;ENSG00000105186;ENSG00000105402;ENSG00000105649;ENSG00000106636;ENSG00000108433;ENSG00000111731;ENSG00000115271;ENSG00000117533;ENSG00000117758;ENSG00000127419;ENSG00000132612;ENSG00000132872;ENSG00000134265…
GO:0009566	fertilization	0.297477	1.62454	0.0166389	0.0735626	74	20	598;4809;10574;55585;6950;22948;7203;57599;1399;11022;10426;7417;10007;10694;11315;10576;3074;7993;10575;109	ENSG00000049860;ENSG00000099942;ENSG00000100138;ENSG00000104691;ENSG00000113552;ENSG00000114742;ENSG00000115484;ENSG00000116288;ENSG00000120438;ENSG00000126216;ENSG00000135624;ENSG00000138031;ENSG00000150753;ENSG00000156261;ENSG00000160714;ENSG00000163468;ENSG00000165637;ENSG00000166226;ENSG00000171552;ENSG00000182134
GO:0008637	apoptotic mitochondrial changes	0.284287	1.61365	0.0110759	0.0736871	91	35	598;4719;55737;664;10059;665;4976;1386;5716;292;282991;56947;637;65018;2932;2730;4836;55288;28978;26355;5071;93974;79594;92609;5516;64422;7529;400916;10971;51024;25994;5599;291;57805;10105	ENSG00000005022;ENSG00000015475;ENSG00000023228;ENSG00000023909;ENSG00000069329;ENSG00000082701;ENSG00000087470;ENSG00000090432;ENSG00000096092;ENSG00000101843;ENSG00000104695;ENSG00000104765;ENSG00000105197;ENSG00000107643;ENSG00000108179;ENSG00000114023;ENSG00000115966;ENSG00000126858;ENSG00000130770;ENSG00000134308;ENSG00000136448;ENSG00000144848;ENSG00000151729;ENSG00000158828;ENSG00000158941…
GO:1901987	regulation of cell cycle phase transition	-0.215257	-1.64052	0	0.0751859	312	117	252983;9814;8556;1069;1019;29882;152110;123879;7027;119504;8738;55755;348654;10217;54801;55835;1263;1781;11170;10106;2146;29997;56257;55795;4957;5111;6154;7508;11064;9702;219736;4194;3550;1654;596;3275;26058;835;994;79960;84142;55031;54623;2273;11116;84131;5108;1453;4849;8444;7175;10806;6659;51343;25949;641;23476;8481;22976;80184;8452;8558;5933;5885;1642;80169;9125;22919;5934;57521;5116;3364;5311…	ENSG00000005483;ENSG00000006712;ENSG00000010244;ENSG00000020922;ENSG00000022267;ENSG00000036257;ENSG00000046651;ENSG00000047410;ENSG00000053254;ENSG00000054282;ENSG00000074054;ENSG00000077380;ENSG00000077684;ENSG00000078674;ENSG00000079335;ENSG00000080802;ENSG00000080839;ENSG00000082014;ENSG00000086827;ENSG00000087206;ENSG00000088038;ENSG00000100393;ENSG00000101224;ENSG00000101367;ENSG00000101639…
GO:2001020	regulation of response to DNA damage stimulus	-0.234167	-1.63791	0.00578035	0.0755529	168	54	25;5111;6154;84501;5514;80311;596;7913;10155;51750;84142;55031;2138;63979;165918;8444;387893;641;7398;22976;158880;5429;142;24144;64210;55100;23347;10269;54537;3297;1859;6787;2074;51366;1655;2140;4193;1025;9320;51720;9984;7919;23411;7468;23049;161742;1660;29072;254225;55183;9774;7158;64844;6498	ENSG00000029363;ENSG00000067369;ENSG00000079134;ENSG00000080345;ENSG00000082068;ENSG00000084073;ENSG00000087206;ENSG00000096717;ENSG00000097007;ENSG00000100109;ENSG00000101596;ENSG00000104313;ENSG00000104517;ENSG00000108654;ENSG00000109685;ENSG00000114904;ENSG00000122376;ENSG00000124795;ENSG00000130726;ENSG00000132436;ENSG00000132646;ENSG00000135679;ENSG00000135829;ENSG00000136536;ENSG00000136603…
GO:0061008	hepaticobiliary system development	-0.255008	-1.63488	0.014245	0.0760342	106	40	55679;6881;5310;23242;5764;1459;10419;2146;55959;54903;5111;5914;2737;5253;57539;6143;538;5906;3725;5970;7049;8837;382;8452;23322;10269;5311;25836;87178;3720;50;3482;26019;11231;6430;3184;7919;6426;6670;5469	ENSG00000003402;ENSG00000008083;ENSG00000008710;ENSG00000011143;ENSG00000025796;ENSG00000036257;ENSG00000069702;ENSG00000070770;ENSG00000072163;ENSG00000084073;ENSG00000100412;ENSG00000100462;ENSG00000100650;ENSG00000103494;ENSG00000105894;ENSG00000106078;ENSG00000106462;ENSG00000106571;ENSG00000108298;ENSG00000116473;ENSG00000118762;ENSG00000118965;ENSG00000125686;ENSG00000131759;ENSG00000132646…
GO:0000726	non-recombinational repair	-0.276149	-1.62331	0.0108108	0.0809333	72	25	7913;84142;165918;84464;51444;4292;641;22976;158880;24144;23137;23347;5932;54537;3297;5422;4361;4683;10524;5591;51720;7468;55183;22992;7158	ENSG00000020922;ENSG00000067369;ENSG00000076242;ENSG00000080345;ENSG00000087206;ENSG00000100109;ENSG00000101596;ENSG00000101773;ENSG00000101868;ENSG00000104320;ENSG00000109685;ENSG00000122376;ENSG00000124795;ENSG00000134758;ENSG00000157212;ENSG00000163322;ENSG00000163961;ENSG00000172977;ENSG00000173120;ENSG00000185122;ENSG00000188827;ENSG00000197299;ENSG00000198887;ENSG00000247746;ENSG00000253729
GO:0044380	protein localization to cytoskeleton	-0.308383	-1.61109	0.015	0.0873349	51	17	5108;1453;51134;1729;9585;22919;9851;3192;2804;10464;55125;11190;324;26005;79648;64770;84376	ENSG00000078674;ENSG00000083535;ENSG00000101367;ENSG00000101639;ENSG00000126001;ENSG00000131504;ENSG00000134982;ENSG00000138182;ENSG00000141551;ENSG00000147316;ENSG00000153187;ENSG00000168014;ENSG00000168172;ENSG00000173230;ENSG00000173588;ENSG00000175455;ENSG00000198920
GO:0045165	cell fate commitment	-0.241859	-1.60814	0	0.0877747	148	88	4286;4920;23493;367;6422;2247;51384;429;5396;30812;6608;4821;64919;4851;6662;7005;9580;6926;6656;3688;10215;8829;28514;2736;2263;7483;6774;5454;25925;6657;2034;81029;4854;4853;5629;5727;116448;6934;5371;4090;50937;6929;3475;4170;23135;2066;84695;3516;8324;5663;5080;85440;10253;4086;8029;6778;836;182;860;7101;6095;6666;7474;5914;2737;596;2260;10297;57453;54623;657;2138;6660;8643;2619;55553;285590;…	ENSG00000002745;ENSG00000005513;ENSG00000006652;ENSG00000006712;ENSG00000007372;ENSG00000007866;ENSG00000064309;ENSG00000066468;ENSG00000067560;ENSG00000069667;ENSG00000071564;ENSG00000074047;ENSG00000074181;ENSG00000077782;ENSG00000080815;ENSG00000099250;ENSG00000101384;ENSG00000104313;ENSG00000104332;ENSG00000106571;ENSG00000107611;ENSG00000107779;ENSG00000107882;ENSG00000110693;ENSG00000111186…
GO:0000209	protein polyubiquitination	0.236536	1.58397	0.00291971	0.0890145	224	78	23291;81847;9354;51434;10299;23014;26268;267;23608;80196;7326;27246;9520;64839;27339;29945;26190;9690;8454;9604;25831;54765;8945;4012;27252;64682;57542;25847;996;8697;25820;64795;6500;26001;387921;9025;57531;7324;83737;115290;7334;51283;63893;26224;89910;54542;54461;9978;54778;10193;55008;329;5071;51132;84961;10273;9870;246330;55658;7336;55284;331;6049;26232;9373;642;10612;3093;285671;10477;22954…	ENSG00000004897;ENSG00000005812;ENSG00000009335;ENSG00000013561;ENSG00000053900;ENSG00000055130;ENSG00000056586;ENSG00000063978;ENSG00000070423;ENSG00000072803;ENSG00000076321;ENSG00000078140;ENSG00000078747;ENSG00000085382;ENSG00000087448;ENSG00000092148;ENSG00000094880;ENSG00000100387;ENSG00000101966;ENSG00000103266;ENSG00000103429;ENSG00000104343;ENSG00000108306;ENSG00000108523;ENSG00000108578…
GO:0045787	positive regulation of cell cycle	-0.212185	-1.59944	0	0.0916867	286	89	7709;2146;4926;219771;10018;7101;56257;55795;25;5111;6154;7474;5914;9349;219736;4194;5514;1654;4040;7042;3054;2260;835;994;54623;153241;85459;4849;8444;7175;25970;8812;6659;811;23476;55023;9585;998;8452;8558;5229;5885;9125;51379;4331;54619;387;23137;5934;57521;79848;6421;3297;5311;25836;29766;84722;3192;4848;79577;5586;6840;5925;4193;1981;1025;904;9984;26057;7919;2033;5087;896;25904;6604;3643;546…	ENSG00000005483;ENSG00000006712;ENSG00000020426;ENSG00000036257;ENSG00000047410;ENSG00000065243;ENSG00000067560;ENSG00000070018;ENSG00000070831;ENSG00000077782;ENSG00000079134;ENSG00000080802;ENSG00000082014;ENSG00000085224;ENSG00000088038;ENSG00000090061;ENSG00000092969;ENSG00000097007;ENSG00000100393;ENSG00000101224;ENSG00000103479;ENSG00000104218;ENSG00000106144;ENSG00000106462;ENSG00000107443…
GO:0036119	response to platelet-derived growth factor	-0.398294	-1.59518	0.0551724	0.0931443	20	14	890;3373;7525;8826;5159;92154;5764;54206;538;867;2534;2241;94056;1385	ENSG00000010810;ENSG00000105894;ENSG00000110395;ENSG00000113721;ENSG00000114378;ENSG00000116285;ENSG00000118260;ENSG00000132613;ENSG00000140575;ENSG00000145386;ENSG00000151422;ENSG00000165240;ENSG00000169895;ENSG00000176105
GO:0035459	cargo loading into vesicle	0.43161	1.56999	0.0335097	0.097482	17	8	5861;56681;10484;22872;9632;10959;375056;6396	ENSG00000079332;ENSG00000086598;ENSG00000100934;ENSG00000138069;ENSG00000138674;ENSG00000154305;ENSG00000157020;ENSG00000176986
GO:0043543	protein acylation	-0.219003	-1.58313	0	0.0996617	202	50	7994;339287;79612;7917;26122;60560;10902;55929;2648;151050;79683;10269;57634;58515;10664;9425;8473;1387;5495;201163;26053;9252;114799;23522;8202;79829;10524;8295;8260;26036;5977;6879;4297;84289;2033;4089;23411;55209;80314;57551;8520;8648;6885;408;25942;51773;23774;4204;80155;55167	ENSG00000005339;ENSG00000048649;ENSG00000083168;ENSG00000084073;ENSG00000084676;ENSG00000096717;ENSG00000100393;ENSG00000100425;ENSG00000100784;ENSG00000102030;ENSG00000102974;ENSG00000108773;ENSG00000110583;ENSG00000112200;ENSG00000112983;ENSG00000113811;ENSG00000118058;ENSG00000120616;ENSG00000124151;ENSG00000128708;ENSG00000133884;ENSG00000135040;ENSG00000135341;ENSG00000135999;ENSG00000137486…
GO:0097242	amyloid-beta clearance	-0.441725	-1.57819	0.0347072	0.101508	14	8	8301;6093;4043;4035;1191;6722;3480;3643	ENSG00000067900;ENSG00000073921;ENSG00000112658;ENSG00000120885;ENSG00000123384;ENSG00000140443;ENSG00000163956;ENSG00000171105
GO:0044843	cell cycle G1/S phase transition	-0.218965	-1.56879	0	0.104985	203	63	1263;11170;5426;10106;2146;23133;56257;4172;4678;5111;6154;571;4194;1654;596;3275;26058;835;79960;54623;2273;4849;6659;23476;6502;8452;8558;5933;9125;51379;4331;5934;57521;5932;143384;5311;5422;4848;6117;79577;90;5591;5925;4193;1981;79027;26057;5558;2033;4863;896;25904;55904;57695;85456;23019;11319;54617;57472;2935;4850;7029;9113	ENSG00000005483;ENSG00000006712;ENSG00000020426;ENSG00000022267;ENSG00000036257;ENSG00000077684;ENSG00000080802;ENSG00000080839;ENSG00000088038;ENSG00000100393;ENSG00000101773;ENSG00000101868;ENSG00000103342;ENSG00000103479;ENSG00000106144;ENSG00000106462;ENSG00000111596;ENSG00000112118;ENSG00000112576;ENSG00000113300;ENSG00000114126;ENSG00000114867;ENSG00000115170;ENSG00000118762;ENSG00000122882…
GO:0009595	detection of biotic stimulus	-0.490912	-1.56901	0.039261	0.106126	11	11	7097;7096;54209;7099;6608;114548;8993;58484;10392;284297;949	ENSG00000008438;ENSG00000073060;ENSG00000091106;ENSG00000095970;ENSG00000106100;ENSG00000128602;ENSG00000136869;ENSG00000137462;ENSG00000162711;ENSG00000174125;ENSG00000179954
GO:0007369	gastrulation	-0.240404	-1.55578	0.0132979	0.112777	119	59	2131;3679;8013;2263;8516;5598;3624;57216;655;6657;1284;6194;92;154796;3678;7358;3693;23135;3675;8324;2335;4086;3909;4771;10399;7709;57045;65125;3685;7474;6722;79971;4040;2260;23275;2132;54623;657;1856;2138;57669;5607;25949;1605;55578;93;8452;10818;123169;7403;9646;79577;90;23332;8289;4089;29072;60412;4087	ENSG00000004975;ENSG00000005884;ENSG00000006712;ENSG00000036257;ENSG00000053747;ENSG00000060237;ENSG00000066468;ENSG00000070018;ENSG00000074054;ENSG00000077782;ENSG00000077943;ENSG00000082781;ENSG00000101144;ENSG00000102710;ENSG00000104313;ENSG00000107779;ENSG00000109814;ENSG00000112658;ENSG00000114251;ENSG00000114739;ENSG00000115109;ENSG00000115170;ENSG00000115414;ENSG00000116729;ENSG00000116809…
GO:0060541	respiratory system development	-0.228219	-1.54139	0.00903614	0.119195	150	92	3280;9509;1490;3397;1050;9241;1512;7422;55036;23657;1749;55636;339829;1956;51176;429;1116;10365;4323;9963;7043;4851;53834;6662;284217;27031;10413;3911;6720;2736;83716;8985;3988;2263;1522;57216;6664;2034;5754;5629;10247;5159;7289;8914;84976;64759;5916;84695;3675;5310;3516;5595;57493;10253;157506;5764;6431;3488;54206;5156;7965;5154;7474;5914;2737;6722;60485;538;4040;10454;2260;23152;657;171023;1605…	ENSG00000005884;ENSG00000008710;ENSG00000066468;ENSG00000070018;ENSG00000072310;ENSG00000074047;ENSG00000077782;ENSG00000078246;ENSG00000079432;ENSG00000087116;ENSG00000100324;ENSG00000100393;ENSG00000101160;ENSG00000101596;ENSG00000101680;ENSG00000102882;ENSG00000103196;ENSG00000103494;ENSG00000103811;ENSG00000105880;ENSG00000105894;ENSG00000106305;ENSG00000106397;ENSG00000106571;ENSG00000107779…
GO:0071559	response to transforming growth factor beta	-0.217204	-1.54201	0.00645161	0.120293	187	47	867;83891;7042;10454;2339;6935;283149;1785;6868;657;3725;6660;57669;10891;7049;8837;23370;2534;55553;8425;93;142;753;51741;6497;387;8239;1387;6386;607;64750;5747;201163;50515;51592;90;26036;317;2033;4089;7311;23411;1385;4087;6885;57154;6498	ENSG00000003402;ENSG00000005339;ENSG00000010810;ENSG00000067560;ENSG00000069702;ENSG00000079805;ENSG00000090006;ENSG00000092969;ENSG00000096717;ENSG00000100324;ENSG00000100393;ENSG00000104880;ENSG00000107779;ENSG00000108854;ENSG00000109762;ENSG00000109819;ENSG00000110395;ENSG00000110693;ENSG00000112200;ENSG00000114739;ENSG00000115109;ENSG00000115170;ENSG00000116128;ENSG00000118260;ENSG00000120868…
GO:0055123	digestive system development	-0.24927	-1.54357	0.0114286	0.120466	95	58	2295;6522;3280;1028;1026;6663;55036;6422;339829;1956;1281;7040;429;6608;7043;4821;1600;4851;6932;3815;27031;6299;2736;2263;3655;57216;9026;688;6664;55366;1373;3091;8642;5310;23242;5156;7474;2737;60485;79971;5125;596;7042;54806;57669;56913;79633;93;57728;286451;51057;25836;57680;5925;26160;9139;3643;4087	ENSG00000008710;ENSG00000021826;ENSG00000066468;ENSG00000074047;ENSG00000078699;ENSG00000081059;ENSG00000091409;ENSG00000092969;ENSG00000099139;ENSG00000100146;ENSG00000100644;ENSG00000100888;ENSG00000102554;ENSG00000103449;ENSG00000104332;ENSG00000105329;ENSG00000106078;ENSG00000106392;ENSG00000106571;ENSG00000113971;ENSG00000114251;ENSG00000114315;ENSG00000114739;ENSG00000115109;ENSG00000116729…
GO:0034330	cell junction organization	-0.209248	-1.52135	0	0.123346	228	68	3909;3728;6801;4867;1002;4983;4771;84612;11170;1739;10395;10580;2017;25;6722;5339;3551;261734;596;7042;5906;2149;8443;23499;85302;1501;1009;84552;57669;3801;865;2316;204851;22998;382;123720;9231;998;1000;977;7414;387;9748;5879;51057;8394;5747;201163;6904;5908;3915;5586;118;60;23332;71;2889;7248;9344;23705;324;25930;79834;8650;4301;9948;1445;5795	ENSG00000035403;ENSG00000053747;ENSG00000064042;ENSG00000065243;ENSG00000065613;ENSG00000067560;ENSG00000067955;ENSG00000070831;ENSG00000071127;ENSG00000074054;ENSG00000075624;ENSG00000075711;ENSG00000076201;ENSG00000079482;ENSG00000085733;ENSG00000087274;ENSG00000092969;ENSG00000095637;ENSG00000097007;ENSG00000103653;ENSG00000104365;ENSG00000107263;ENSG00000112658;ENSG00000115109;ENSG00000115808…
GO:0007164	establishment of tissue polarity	-0.266185	-1.52269	0.0207254	0.123697	71	30	84133;23245;89958;166336;22881;8324;4300;409;54903;25;7474;7074;2239;1856;998;23002;1857;10427;387;23322;9968;5879;10640;64750;6259;9948;27152;9863;57154;65250	ENSG00000004975;ENSG00000011143;ENSG00000067560;ENSG00000070367;ENSG00000070831;ENSG00000071127;ENSG00000076716;ENSG00000097007;ENSG00000100592;ENSG00000103494;ENSG00000108854;ENSG00000114251;ENSG00000135299;ENSG00000136238;ENSG00000138802;ENSG00000141480;ENSG00000148219;ENSG00000155760;ENSG00000156299;ENSG00000161202;ENSG00000163637;ENSG00000163785;ENSG00000164066;ENSG00000171843;ENSG00000183579…
GO:0007492	endoderm development	-0.299083	-1.52549	0.0395062	0.124638	46	29	677;7040;4323;4851;4313;1291;2131;3679;3624;3065;6657;1284;3678;3693;2335;3909;3685;2186;54623;657;57669;9968;123169;9646;3915;79577;4089;29072;4087	ENSG00000006712;ENSG00000053747;ENSG00000082781;ENSG00000087245;ENSG00000105329;ENSG00000107779;ENSG00000115109;ENSG00000115414;ENSG00000116478;ENSG00000122641;ENSG00000134371;ENSG00000134871;ENSG00000135424;ENSG00000135862;ENSG00000138448;ENSG00000141646;ENSG00000142156;ENSG00000148400;ENSG00000157227;ENSG00000161638;ENSG00000166477;ENSG00000171634;ENSG00000175387;ENSG00000181449;ENSG00000181555…
GO:0003205	cardiac chamber development	-0.234414	-1.52328	0.0110803	0.124694	123	34	182;6091;6256;54903;7474;5914;6722;60485;8131;5125;7042;10454;9321;1785;657;7049;6659;9794;51684;10818;54583;10277;10269;90;4193;8289;3340;7541;4089;7468;6604;6654;5469;65250	ENSG00000011143;ENSG00000069702;ENSG00000070614;ENSG00000079805;ENSG00000082014;ENSG00000084073;ENSG00000092969;ENSG00000099139;ENSG00000100324;ENSG00000100815;ENSG00000101384;ENSG00000103148;ENSG00000107779;ENSG00000107882;ENSG00000109685;ENSG00000112658;ENSG00000114251;ENSG00000115170;ENSG00000115904;ENSG00000117713;ENSG00000124766;ENSG00000125686;ENSG00000130939;ENSG00000131759;ENSG00000135679…
GO:0000075	cell cycle checkpoint	-0.217823	-1.51695	0.003003	0.125109	169	62	7027;197342;8738;55755;348654;1263;1739;84444;29997;80198;54888;55795;1763;5111;6154;25896;7508;4194;3550;5514;26058;835;84142;4849;7175;55743;6659;51343;25949;641;9125;5934;3364;7155;4848;1112;4361;4683;5591;51322;5925;9183;4193;2956;51720;9984;9344;51347;7919;2033;7756;65123;25904;324;57551;7158;85456;23019;8682;57472;4850;7029	ENSG00000010244;ENSG00000020922;ENSG00000037474;ENSG00000047410;ENSG00000053254;ENSG00000067369;ENSG00000072609;ENSG00000075711;ENSG00000077097;ENSG00000079134;ENSG00000080802;ENSG00000086827;ENSG00000087206;ENSG00000088038;ENSG00000095787;ENSG00000100393;ENSG00000103479;ENSG00000104320;ENSG00000104885;ENSG00000105325;ENSG00000105373;ENSG00000106144;ENSG00000111596;ENSG00000113141;ENSG00000113300…
GO:0097581	lamellipodium organization	-0.268809	-1.53193	0.0282776	0.125579	70	28	54961;7410;79902;2017;55704;3983;538;51177;1785;5756;10810;22885;25970;348110;123720;55604;998;7414;54434;6642;5879;9759;26053;10006;2241;85464;79647;832	ENSG00000023902;ENSG00000028528;ENSG00000035403;ENSG00000068024;ENSG00000070831;ENSG00000077549;ENSG00000079691;ENSG00000079805;ENSG00000084112;ENSG00000085733;ENSG00000099204;ENSG00000115355;ENSG00000125450;ENSG00000132970;ENSG00000136238;ENSG00000136754;ENSG00000141298;ENSG00000151239;ENSG00000151422;ENSG00000156232;ENSG00000158321;ENSG00000160293;ENSG00000165240;ENSG00000172830;ENSG00000173210…
GO:0060491	regulation of cell projection assembly	-0.217728	-1.51435	0.00874636	0.125737	163	66	9662;116985;49856;23224;989;55909;1809;23102;9696;23242;3064;9750;23216;54961;55835;116840;585;9842;57787;83874;55704;6722;5898;54849;538;55296;1785;5756;5909;125058;5025;7813;153241;79735;382;9712;54874;998;8558;54942;54434;57489;10807;5879;51466;9759;51057;79598;64786;9742;26053;2909;2241;23613;85464;23061;9779;79647;57533;26751;832;324;128637;25771;23637;22873	ENSG00000006451;ENSG00000007047;ENSG00000011454;ENSG00000035115;ENSG00000054611;ENSG00000054654;ENSG00000058453;ENSG00000065882;ENSG00000067208;ENSG00000068024;ENSG00000070831;ENSG00000076864;ENSG00000077549;ENSG00000079805;ENSG00000084112;ENSG00000099992;ENSG00000101040;ENSG00000104946;ENSG00000106078;ENSG00000109680;ENSG00000111913;ENSG00000112658;ENSG00000113657;ENSG00000115355;ENSG00000116213…
GO:0032200	telomere organization	-0.231798	-1.52563	0.0149701	0.125987	127	40	23381;79618;9887;51750;5981;10039;10728;84464;7013;641;220064;142;24144;80169;55226;8658;23293;23137;3364;11284;5394;5422;54552;3181;3192;6117;4361;4683;80351;3104;5591;3184;5558;23049;55183;546;55869;85456;79677;7486	ENSG00000020922;ENSG00000035928;ENSG00000039650;ENSG00000041880;ENSG00000070366;ENSG00000080345;ENSG00000085224;ENSG00000100109;ENSG00000101868;ENSG00000104320;ENSG00000107854;ENSG00000110958;ENSG00000116698;ENSG00000122566;ENSG00000130119;ENSG00000132383;ENSG00000135372;ENSG00000136273;ENSG00000138668;ENSG00000143799;ENSG00000146143;ENSG00000147099;ENSG00000147421;ENSG00000147601;ENSG00000149115…
GO:0035051	cardiocyte differentiation	-0.24714	-1.52624	0.0156658	0.127096	99	61	23493;7422;11149;1956;7040;4604;26585;8736;5978;4851;6926;3479;10611;3688;84700;1948;28514;4000;5465;2022;655;148;5997;5629;5159;25776;23135;3516;8324;5595;7273;10529;4703;182;5156;6256;409;80206;5914;6722;7042;23363;8470;7049;811;9794;9150;55553;11214;10818;2648;27250;10269;6444;3192;90;6443;8289;7248;7919;4089	ENSG00000017427;ENSG00000060069;ENSG00000069702;ENSG00000078114;ENSG00000084073;ENSG00000084093;ENSG00000092969;ENSG00000100211;ENSG00000101144;ENSG00000101384;ENSG00000101605;ENSG00000102882;ENSG00000105329;ENSG00000106991;ENSG00000108773;ENSG00000110693;ENSG00000112276;ENSG00000112658;ENSG00000112715;ENSG00000113721;ENSG00000115170;ENSG00000116741;ENSG00000117707;ENSG00000117713;ENSG00000120907…
GO:0016073	snRNA metabolic process	-0.253438	-1.51099	0.0259067	0.127219	84	30	6882;23404;203522;5430;79664;51593;8812;79066;54973;57117;23379;6621;5451;55656;7702;26173;51010;129685;2961;58490;92105;2963;79871;1025;2957;904;65123;4686;26512;23248	ENSG00000064995;ENSG00000087087;ENSG00000090061;ENSG00000101413;ENSG00000102786;ENSG00000107371;ENSG00000122484;ENSG00000127054;ENSG00000127804;ENSG00000128915;ENSG00000129315;ENSG00000130713;ENSG00000136807;ENSG00000136937;ENSG00000137413;ENSG00000138785;ENSG00000143190;ENSG00000143624;ENSG00000149262;ENSG00000163125;ENSG00000164151;ENSG00000164880;ENSG00000164941;ENSG00000165359;ENSG00000165417…
GO:0001701	in utero embryonic development	-0.201437	-1.50954	0.00343643	0.12726	272	76	3633;5156;10018;6256;824;4678;57534;54880;2737;6722;728661;9546;7779;538;10454;3054;2260;2186;10155;2551;29123;657;57178;4849;79600;57669;25949;55553;8452;54892;689;54583;57448;57728;2648;23322;5932;63925;4245;3297;5311;129685;6830;201163;7403;9646;4627;57677;4848;22846;23038;118;57680;4683;90;5335;207;26259;10049;4089;23081;6426;29072;102;4087;6670;8648;5930;5469;26469;25942;405;26005;6789;6498;…	ENSG00000011132;ENSG00000036257;ENSG00000071246;ENSG00000072135;ENSG00000077782;ENSG00000084676;ENSG00000087274;ENSG00000088038;ENSG00000100324;ENSG00000100345;ENSG00000100888;ENSG00000101109;ENSG00000101752;ENSG00000101773;ENSG00000103494;ENSG00000104320;ENSG00000105993;ENSG00000106571;ENSG00000107077;ENSG00000107779;ENSG00000108175;ENSG00000108773;ENSG00000109111;ENSG00000110693;ENSG00000111596…
GO:0060021	roof of mouth development	-0.267382	-1.52655	0.00526316	0.128352	67	21	1739;5156;10220;54880;7474;2737;1302;8131;4040;7042;8879;657;7049;93;6497;51057;26160;4089;6654;4087;65250	ENSG00000069702;ENSG00000070018;ENSG00000075711;ENSG00000092969;ENSG00000103148;ENSG00000106571;ENSG00000107779;ENSG00000114251;ENSG00000114739;ENSG00000115904;ENSG00000134853;ENSG00000135414;ENSG00000138002;ENSG00000141646;ENSG00000143951;ENSG00000157933;ENSG00000166224;ENSG00000175387;ENSG00000183337;ENSG00000197603;ENSG00000204248
GO:0006413	translational initiation	0.247121	1.52518	0.0106707	0.132148	144	47	440275;8672;8893;5433;27102;9470;1964;7458;57002;10480;1653;253943;10605;8562;51247;468;83939;6059;2475;6198;54915;219402;10987;4528;6235;8872;6138;2332;51441;5499;1977;8668;1965;28985;8891;1983;123263;10289;84285;27335;6130;8666;22927;8667;6208;8892;4690	ENSG00000070785;ENSG00000075151;ENSG00000079785;ENSG00000084623;ENSG00000085760;ENSG00000086232;ENSG00000100664;ENSG00000102081;ENSG00000103707;ENSG00000106682;ENSG00000108443;ENSG00000114784;ENSG00000119718;ENSG00000120727;ENSG00000121022;ENSG00000122033;ENSG00000128272;ENSG00000128829;ENSG00000130811;ENSG00000130956;ENSG00000134001;ENSG00000135930;ENSG00000139726;ENSG00000144231;ENSG00000144895…
GO:0010639	negative regulation of organelle organization	-0.199564	-1.4968	0.00655738	0.136632	282	91	1191;23133;409;54464;55795;80206;3998;54880;8500;3178;4534;5253;3550;2395;10533;89795;10297;146691;1785;51750;3006;5756;6598;4302;7175;10891;84464;7013;56890;255027;10519;348110;55604;142;8558;5252;5885;54454;80169;55226;8658;4331;23293;2648;22919;6497;57489;23075;25842;5927;79598;54978;5394;10201;6830;201163;29766;54552;23274;7249;6904;1859;3192;3720;118;51366;4683;80351;9183;23332;207;8260;9320…	ENSG00000008083;ENSG00000010244;ENSG00000020426;ENSG00000038532;ENSG00000047410;ENSG00000062650;ENSG00000066135;ENSG00000067798;ENSG00000070366;ENSG00000073614;ENSG00000074054;ENSG00000074695;ENSG00000075785;ENSG00000077549;ENSG00000079691;ENSG00000079805;ENSG00000085224;ENSG00000086827;ENSG00000087274;ENSG00000094631;ENSG00000096717;ENSG00000099956;ENSG00000101367;ENSG00000102030;ENSG00000103197…
GO:0002697	regulation of immune effector process	-0.209142	-1.49419	0.00621118	0.137235	196	54	29997;1191;409;10758;7474;5914;7374;10892;3916;23586;7042;5906;7189;26146;9188;4292;63906;8767;5585;22976;6397;613;200558;55666;8915;3735;10269;51010;54537;58515;5495;6830;2074;2241;5591;7187;149041;2889;2956;9984;26057;6810;5094;22890;7468;23705;1660;55183;6885;54476;25942;7158;23369;5795	ENSG00000011275;ENSG00000055917;ENSG00000056972;ENSG00000065427;ENSG00000067369;ENSG00000076242;ENSG00000076248;ENSG00000079134;ENSG00000080345;ENSG00000084073;ENSG00000092969;ENSG00000103496;ENSG00000104312;ENSG00000105373;ENSG00000107201;ENSG00000107263;ENSG00000107371;ENSG00000109111;ENSG00000109685;ENSG00000113811;ENSG00000114251;ENSG00000116062;ENSG00000116473;ENSG00000120885;ENSG00000122376…
GO:0055076	transition metal ion homeostasis	0.264793	1.51234	0.0290323	0.142209	92	32	9550;27102;55832;8454;7782;10463;51312;6500;80762;10539;5621;6647;8031;3163;3658;94081;9114;51310;375;5071;537;84317;351;25800;331;147007;23400;64116;475;4891;523;23516	ENSG00000014824;ENSG00000055130;ENSG00000071553;ENSG00000086232;ENSG00000092096;ENSG00000101966;ENSG00000103415;ENSG00000104154;ENSG00000104635;ENSG00000108010;ENSG00000110911;ENSG00000111530;ENSG00000113558;ENSG00000114573;ENSG00000131507;ENSG00000136381;ENSG00000136710;ENSG00000136888;ENSG00000138821;ENSG00000141424;ENSG00000142168;ENSG00000142192;ENSG00000143761;ENSG00000147454;ENSG00000159363…
GO:0043620	regulation of DNA-templated transcription in response to stress	-0.268291	-1.47914	0.0293333	0.147219	62	13	54583;84181;1387;3297;10985;22926;2033;1388;7311;9774;25942;54617;405	ENSG00000005339;ENSG00000029363;ENSG00000089154;ENSG00000100393;ENSG00000118217;ENSG00000124177;ENSG00000128908;ENSG00000135766;ENSG00000143437;ENSG00000169375;ENSG00000185122;ENSG00000213676;ENSG00000221983
GO:0030323	respiratory tube development	-0.223216	-1.48092	0.017341	0.14725	134	82	3280;9509;1490;3397;1050;9241;1512;7422;55036;23657;339829;1956;429;1116;10365;4323;9963;7043;4851;6662;284217;27031;9618;10413;3911;6720;2736;83716;8985;3988;2263;1522;57216;6664;2034;5754;5629;10247;5159;7289;8914;64759;84695;3675;5310;3516;5595;57493;10253;157506;5764;6431;3488;54206;5156;7965;5154;7474;2737;6722;60485;5125;538;10454;2260;23152;657;171023;1605;93;9231;7917;10427;57190;6310;706…	ENSG00000005884;ENSG00000008710;ENSG00000066468;ENSG00000072310;ENSG00000074047;ENSG00000076604;ENSG00000077782;ENSG00000078246;ENSG00000079432;ENSG00000087116;ENSG00000099139;ENSG00000100324;ENSG00000100393;ENSG00000101160;ENSG00000101680;ENSG00000102882;ENSG00000103196;ENSG00000103811;ENSG00000105894;ENSG00000106305;ENSG00000106397;ENSG00000106571;ENSG00000107779;ENSG00000107798;ENSG00000111602…
GO:0001578	microtubule bundle formation	-0.26312	-1.47656	0.0234375	0.148194	63	37	89765;1769;1767;84223;344148;51673;85478;85452;221421;154313;91978;115948;6674;55779;79989;7320;54777;2622;583;55755;23116;54919;4926;57787;25981;57701;57545;26140;23639;285331;54839;84722;23332;89796;7756;6249;83544	ENSG00000007047;ENSG00000010244;ENSG00000039139;ENSG00000048342;ENSG00000074054;ENSG00000104450;ENSG00000105948;ENSG00000114473;ENSG00000114841;ENSG00000119048;ENSG00000119661;ENSG00000124721;ENSG00000125124;ENSG00000129295;ENSG00000130779;ENSG00000134222;ENSG00000134369;ENSG00000136861;ENSG00000137497;ENSG00000137821;ENSG00000139537;ENSG00000141013;ENSG00000141933;ENSG00000142609;ENSG00000159713…
GO:0021591	ventricular system development	-0.343435	-1.46648	0.079602	0.149205	23	12	55582;8382;25911;1021;84678;80031;585;79809;4331;23322;8650;4204	ENSG00000020426;ENSG00000089094;ENSG00000103494;ENSG00000105810;ENSG00000112981;ENSG00000123607;ENSG00000133961;ENSG00000137872;ENSG00000140463;ENSG00000165115;ENSG00000166171;ENSG00000169057
GO:0045730	respiratory burst	-0.408232	-1.46504	0.0634921	0.149348	15	4	613;5879;58515;3643	ENSG00000113811;ENSG00000136238;ENSG00000171105;ENSG00000186716
GO:0071526	semaphorin-plexin signaling pathway	-0.306462	-1.46346	0.0528846	0.149355	38	38	5362;10154;10500;8482;91584;10371;10501;10505;23129;4233;9723;56920;6405;23616;7869;5365;10512;8828;5361;9037;5364;8829;57556;64218;54437;10509;55558;54910;223117;10507;80031;396;57715;23654;2316;5879;9855;4684	ENSG00000001617;ENSG00000004399;ENSG00000006607;ENSG00000010319;ENSG00000012171;ENSG00000075213;ENSG00000075223;ENSG00000076356;ENSG00000082684;ENSG00000092421;ENSG00000095539;ENSG00000099250;ENSG00000100092;ENSG00000105976;ENSG00000112902;ENSG00000114554;ENSG00000118257;ENSG00000130827;ENSG00000135622;ENSG00000136040;ENSG00000136238;ENSG00000137872;ENSG00000138623;ENSG00000141522;ENSG00000143434…
GO:0046777	protein autophosphorylation	-0.202585	-1.46679	0.0121951	0.150348	189	53	9706;5156;2081;65125;5154;5062;25;29904;23043;5525;57396;2260;6793;23178;10155;10188;3725;65267;27;5610;2534;57826;613;9451;7786;9748;1612;5747;92597;1859;9943;23235;4361;2241;4683;1198;207;50488;8737;9344;51347;23049;3480;1196;57551;79834;3643;8805;4140;85456;1445;51755;6789	ENSG00000010810;ENSG00000020922;ENSG00000055332;ENSG00000060237;ENSG00000061938;ENSG00000065613;ENSG00000066027;ENSG00000072786;ENSG00000075413;ENSG00000077782;ENSG00000083290;ENSG00000097007;ENSG00000101109;ENSG00000103319;ENSG00000103653;ENSG00000104320;ENSG00000113240;ENSG00000115687;ENSG00000122779;ENSG00000123728;ENSG00000130726;ENSG00000134853;ENSG00000135090;ENSG00000137275;ENSG00000139625…
GO:0043900	regulation of multi-organism process	-0.201932	-1.47255	0.0058997	0.150577	227	62	1654;596;8654;23586;8878;6882;5479;81559;10155;7189;10206;6598;26146;7076;3725;9126;8812;63906;8767;64710;811;5610;9150;6397;10519;1642;23005;23367;4882;151056;55666;10269;58515;11267;7155;10318;5495;64750;103;5586;2074;23076;1655;7187;6597;23265;23435;1105;1025;904;26057;5094;2033;1660;27161;128637;54476;25942;7879;51773;3609;23369	ENSG00000011275;ENSG00000048649;ENSG00000055332;ENSG00000055917;ENSG00000060069;ENSG00000064995;ENSG00000065243;ENSG00000069275;ENSG00000075785;ENSG00000077097;ENSG00000084073;ENSG00000090061;ENSG00000099956;ENSG00000100393;ENSG00000102265;ENSG00000104312;ENSG00000107201;ENSG00000108055;ENSG00000108654;ENSG00000108854;ENSG00000113811;ENSG00000120948;ENSG00000123908;ENSG00000125875;ENSG00000127616…
GO:1990089	response to nerve growth factor	-0.290404	-1.46787	0.0352941	0.150589	44	15	867;5906;6272;1453;1938;382;10519;9101;2648;207;23095;2889;1385;23527;9863	ENSG00000054523;ENSG00000107263;ENSG00000108773;ENSG00000110395;ENSG00000114331;ENSG00000116473;ENSG00000118260;ENSG00000134243;ENSG00000138592;ENSG00000141551;ENSG00000142208;ENSG00000165527;ENSG00000167658;ENSG00000185043;ENSG00000187391
GO:0002009	morphogenesis of an epithelium	-0.189376	-1.46857	0.003861	0.151429	361	134	3678;5629;388591;1839;9839;5727;388;6239;1601;55366;7289;5371;54910;3091;8914;8642;7408;84133;23245;5916;4524;89958;166336;22881;5310;3516;64398;8324;5663;23242;84678;4300;10253;157506;6788;3488;25865;2119;65979;4983;1739;10395;585;182;6201;6256;23513;409;5154;54903;57534;25;7474;5914;2737;6722;7074;5898;219736;596;538;4040;55083;7042;2260;1282;10155;129880;2239;7189;9788;6868;1856;26146;54806;21…	ENSG00000004975;ENSG00000006451;ENSG00000008710;ENSG00000011114;ENSG00000011143;ENSG00000035403;ENSG00000048342;ENSG00000067560;ENSG00000070018;ENSG00000070367;ENSG00000070831;ENSG00000071127;ENSG00000072415;ENSG00000074054;ENSG00000075711;ENSG00000076716;ENSG00000077782;ENSG00000078246;ENSG00000079482;ENSG00000080815;ENSG00000089094;ENSG00000092969;ENSG00000097007;ENSG00000100592;ENSG00000100644…
GO:0009266	response to temperature stimulus	0.239329	1.50129	0.0103397	0.151797	160	54	3066;440275;81570;80196;8893;5433;7415;7266;170506;10569;10294;4287;9093;2475;3312;4763;545;6198;2932;6647;65084;488;30001;3301;1965;3326;8891;2288;3298;10273;573;4137;7341;8892;6548;5468;64223;27344;6782;3313;134;27000;3320;5931;5566;5594;51501;51182;6119;3654;79752;57805;57468;6489	ENSG00000004478;ENSG00000025156;ENSG00000066427;ENSG00000069345;ENSG00000070785;ENSG00000072062;ENSG00000080824;ENSG00000082701;ENSG00000086061;ENSG00000090020;ENSG00000096384;ENSG00000100030;ENSG00000102054;ENSG00000102109;ENSG00000103266;ENSG00000103423;ENSG00000104231;ENSG00000105821;ENSG00000106399;ENSG00000107262;ENSG00000108443;ENSG00000109971;ENSG00000111728;ENSG00000113013;ENSG00000116030…
GO:0006353	DNA-templated transcription, termination	-0.263676	-1.46869	0.0340633	0.152742	64	21	9015;5430;221830;84172;7343;4331;10269;23064;22803;902;51585;2967;8189;2071;9013;9014;79869;1660;4686;10914;22828	ENSG00000020426;ENSG00000084073;ENSG00000088930;ENSG00000090060;ENSG00000103168;ENSG00000105849;ENSG00000107290;ENSG00000108312;ENSG00000111358;ENSG00000115750;ENSG00000125630;ENSG00000125755;ENSG00000134480;ENSG00000135829;ENSG00000136937;ENSG00000143498;ENSG00000149532;ENSG00000163161;ENSG00000165494;ENSG00000181222;ENSG00000213079
GO:0007389	pattern specification process	-0.1924	-1.45505	0	0.156016	274	109	55081;23648;2022;57216;65057;4038;115948;655;5986;92;7704;5681;80055;388591;9839;5727;444;123016;7289;3091;8642;4090;50937;84976;5916;2066;25911;3516;1947;5663;23242;5080;9289;201164;84678;4300;2622;4281;4086;8831;585;6091;10220;54903;57534;54880;7474;2737;6722;79971;5125;2018;4040;64853;2260;10297;84314;22856;6935;57453;2186;79809;129880;23509;657;1856;26146;54806;2138;79600;57669;57545;22955;20…	ENSG00000004975;ENSG00000007372;ENSG00000010803;ENSG00000011143;ENSG00000046651;ENSG00000048342;ENSG00000064309;ENSG00000070018;ENSG00000074266;ENSG00000077782;ENSG00000078246;ENSG00000080298;ENSG00000080815;ENSG00000082014;ENSG00000089094;ENSG00000090776;ENSG00000096872;ENSG00000099139;ENSG00000100280;ENSG00000100393;ENSG00000100644;ENSG00000101144;ENSG00000101346;ENSG00000101752;ENSG00000101871…
GO:0033619	membrane protein proteolysis	-0.278994	-1.45171	0.0335052	0.158133	48	22	257364;5663;84236;6093;7077;51429;7079;8754;27316;84888;7189;6868;7076;5970;9860;23621;1605;23385;81502;4790;4627;102	ENSG00000035862;ENSG00000067900;ENSG00000080815;ENSG00000100345;ENSG00000101294;ENSG00000102265;ENSG00000109320;ENSG00000130340;ENSG00000137845;ENSG00000138600;ENSG00000144468;ENSG00000147274;ENSG00000151694;ENSG00000157150;ENSG00000162736;ENSG00000168615;ENSG00000173039;ENSG00000173402;ENSG00000173548;ENSG00000175104;ENSG00000186318;ENSG00000198799
GO:0006081	cellular aldehyde metabolic process	0.300174	1.48749	0.0363036	0.158328	50	21	10327;51109;3029;5226;55163;2739;25953;11315;2821;128;220;55276;7086;2806;7167;57103;27122;2098;9380;3417;3795	ENSG00000050165;ENSG00000063854;ENSG00000072042;ENSG00000078237;ENSG00000105220;ENSG00000108439;ENSG00000111669;ENSG00000116288;ENSG00000117448;ENSG00000124767;ENSG00000125166;ENSG00000127838;ENSG00000137106;ENSG00000138030;ENSG00000138413;ENSG00000139684;ENSG00000142657;ENSG00000163931;ENSG00000169299;ENSG00000184254;ENSG00000197894
GO:0036260	RNA capping	0.338436	1.48488	0.0657194	0.159159	31	13	5433;8731;5434;5432;5440;23070;5431;2962;5437;2965;404672;96764;2068	ENSG00000047315;ENSG00000099817;ENSG00000101654;ENSG00000102978;ENSG00000104884;ENSG00000110768;ENSG00000125651;ENSG00000137200;ENSG00000137574;ENSG00000144231;ENSG00000147669;ENSG00000163882;ENSG00000272047
GO:0140112	extracellular vesicle biogenesis	0.397734	1.48826	0.0578947	0.159689	20	8	8027;7251;8766;10987;27243;27183;9525;5071	ENSG00000074319;ENSG00000103769;ENSG00000119541;ENSG00000121022;ENSG00000130724;ENSG00000132612;ENSG00000136738;ENSG00000185345
GO:0032386	regulation of intracellular transport	0.20882	1.49083	0.00693481	0.161069	356	116	27248;54439;5494;22930;10134;9270;10204;84455;54471;10059;9520;1432;23317;54828;23636;29934;665;51308;56681;57617;5905;10484;3717;11235;51277;2664;55754;65009;22902;8723;9581;4924;5868;4763;3265;56947;9747;55432;5621;65018;2932;81565;55288;11236;11315;55696;9221;81555;89781;51763;488;2332;9648;11261;51496;65055;55823;56850;9777;375;3326;23256;57102;5071;9847;84961;673;93974;64801;57510;26229;5501…	ENSG00000006740;ENSG00000018189;ENSG00000034053;ENSG00000047621;ENSG00000065150;ENSG00000068400;ENSG00000068615;ENSG00000068912;ENSG00000070087;ENSG00000072062;ENSG00000079332;ENSG00000079841;ENSG00000082701;ENSG00000086589;ENSG00000087053;ENSG00000087470;ENSG00000091009;ENSG00000092108;ENSG00000096384;ENSG00000096968;ENSG00000100030;ENSG00000100099;ENSG00000100335;ENSG00000100401;ENSG00000100614…
GO:0009112	nucleobase metabolic process	0.354056	1.48828	0.0483871	0.161918	28	12	8833;2475;51292;23028;51727;5471;1503;25902;790;10606;6240;5594	ENSG00000004487;ENSG00000084774;ENSG00000100030;ENSG00000100938;ENSG00000120254;ENSG00000128050;ENSG00000128059;ENSG00000162368;ENSG00000163655;ENSG00000167325;ENSG00000171793;ENSG00000198793
GO:1903828	negative regulation of cellular protein localization	0.261401	1.47809	0.0316456	0.164362	94	26	27248;598;9270;55737;1213;57120;146057;23484;5905;2664;1173;9528;9475;9258;4763;55432;2932;11315;51763;11261;3301;55968;10434;10956;4137;51465	ENSG00000047932;ENSG00000068912;ENSG00000069329;ENSG00000082701;ENSG00000086061;ENSG00000088833;ENSG00000100401;ENSG00000104660;ENSG00000116209;ENSG00000116288;ENSG00000119185;ENSG00000120992;ENSG00000128881;ENSG00000132376;ENSG00000134318;ENSG00000135506;ENSG00000141367;ENSG00000147324;ENSG00000161203;ENSG00000171552;ENSG00000180667;ENSG00000186868;ENSG00000187446;ENSG00000196712;ENSG00000198833…
GO:0140029	exocytic process	0.272014	1.47129	0.0304487	0.167981	74	34	11311;57617;152579;55770;65082;8723;10490;10890;26258;10652;5899;55823;10244;23256;9900;22871;149371;93664;54536;8775;8867;10815;6843;63908;10497;8541;10814;6844;9751;26276;115827;116841;5864;6809	ENSG00000081803;ENSG00000084733;ENSG00000092108;ENSG00000100568;ENSG00000101298;ENSG00000104142;ENSG00000104164;ENSG00000105402;ENSG00000105649;ENSG00000106636;ENSG00000112685;ENSG00000114520;ENSG00000116903;ENSG00000125814;ENSG00000136631;ENSG00000136933;ENSG00000138190;ENSG00000139190;ENSG00000139719;ENSG00000143740;ENSG00000144118;ENSG00000145920;ENSG00000152932;ENSG00000159082;ENSG00000159164…
GO:0051188	cofactor biosynthetic process	0.218725	1.4715	0.0100143	0.169891	229	75	2181;27430;5538;5315;326625;8034;4967;10327;5213;1355;57546;3029;51522;1737;10243;211;55163;8050;80025;4779;3098;5230;5214;5160;55753;4704;6647;25974;2730;27249;3658;80219;79646;65220;2937;38;2026;4338;669;31;5092;128240;2821;51004;55739;25902;93974;5162;2235;9054;7390;7389;11019;55229;8803;6785;27304;79071;3939;1738;23057;3692;4891;7167;57103;2182;79717;5236;11332;25874;53354;54977;6697;4337;201…	ENSG00000008130;ENSG00000014919;ENSG00000023330;ENSG00000023909;ENSG00000038274;ENSG00000063854;ENSG00000066926;ENSG00000067057;ENSG00000067225;ENSG00000068366;ENSG00000075239;ENSG00000078237;ENSG00000079739;ENSG00000082641;ENSG00000091140;ENSG00000097021;ENSG00000100983;ENSG00000102144;ENSG00000105220;ENSG00000105953;ENSG00000108439;ENSG00000110435;ENSG00000110911;ENSG00000111669;ENSG00000111674…
GO:0044839	cell cycle G2/M phase transition	-0.208116	-1.43688	0.018018	0.170973	178	48	1785;994;84142;55031;2273;11116;84131;5108;1453;8444;10806;51343;8493;25949;641;23476;8481;22976;6502;80184;5885;80169;22919;6873;26993;5116;3364;10142;1112;4361;4683;23332;55125;11190;2956;51720;9344;51347;7531;5087;80321;6604;57551;25942;4204;9555;10657;9113	ENSG00000011243;ENSG00000020922;ENSG00000022267;ENSG00000046651;ENSG00000053254;ENSG00000054282;ENSG00000064313;ENSG00000074054;ENSG00000078674;ENSG00000079805;ENSG00000082014;ENSG00000087206;ENSG00000101224;ENSG00000101367;ENSG00000101639;ENSG00000104320;ENSG00000105325;ENSG00000108953;ENSG00000113648;ENSG00000114107;ENSG00000116062;ENSG00000117614;ENSG00000121774;ENSG00000126001;ENSG00000127914…
GO:0023019	signal transduction involved in regulation of gene expression	-0.44664	-1.43186	0.0967033	0.174596	10	4	5080;5156;142;4087	ENSG00000007372;ENSG00000134853;ENSG00000143799;ENSG00000175387
GO:0007059	chromosome segregation	-0.196514	-1.42993	0.0179104	0.175268	216	52	7175;27030;84464;7013;4292;64793;641;998;8452;10096;7917;5885;51112;8658;64210;56916;23137;348995;6421;26993;8239;129563;7155;10664;192670;23244;25836;11011;7150;84722;114799;3192;4361;5925;9183;8260;10464;79892;23063;7756;23126;23353;7329;324;546;23310;55869;79677;9555;54617;23369;9113	ENSG00000010244;ENSG00000011243;ENSG00000020922;ENSG00000036257;ENSG00000047410;ENSG00000055917;ENSG00000062650;ENSG00000070831;ENSG00000076242;ENSG00000077097;ENSG00000083535;ENSG00000085224;ENSG00000086827;ENSG00000102030;ENSG00000102974;ENSG00000103275;ENSG00000113648;ENSG00000115091;ENSG00000116560;ENSG00000119684;ENSG00000120253;ENSG00000121892;ENSG00000124486;ENSG00000128908;ENSG00000130695…
GO:0042113	B cell activation	-0.211935	-1.42615	0.0231884	0.177781	143	36	55795;25;5293;57162;7374;10892;596;6868;55846;165918;4292;5585;200081;96459;22976;200558;23075;51010;54537;9759;6830;8660;359948;9730;4683;5591;149041;2956;9984;2033;22890;7468;55183;6670;7158;5795	ENSG00000067369;ENSG00000068024;ENSG00000076242;ENSG00000076248;ENSG00000079134;ENSG00000080345;ENSG00000084652;ENSG00000097007;ENSG00000100393;ENSG00000104320;ENSG00000107371;ENSG00000109111;ENSG00000109685;ENSG00000111203;ENSG00000116062;ENSG00000122376;ENSG00000123143;ENSG00000126226;ENSG00000126804;ENSG00000133789;ENSG00000135870;ENSG00000145041;ENSG00000149177;ENSG00000151694;ENSG00000157212…
GO:0002064	epithelial cell development	-0.209462	-1.42416	0.014245	0.1783	155	89	7431;5962;30812;5138;6608;654;2947;4821;4478;64919;23086;5912;4851;9076;6662;7716;10411;28514;80781;11078;26051;8985;5175;5872;7132;57619;23022;153562;2022;50848;7430;688;5144;4647;81029;7082;9497;3295;5629;1903;8826;26084;3091;5916;122786;2195;1021;5080;3913;9750;57493;54507;2683;6093;51092;4659;220074;182;2317;23094;23513;7474;353116;5914;3551;51735;22862;2260;5906;5802;57669;2316;56913;57826;5…	ENSG00000005513;ENSG00000007372;ENSG00000026025;ENSG00000032219;ENSG00000033867;ENSG00000054267;ENSG00000058272;ENSG00000067182;ENSG00000067900;ENSG00000077782;ENSG00000079337;ENSG00000080298;ENSG00000083857;ENSG00000085224;ENSG00000086062;ENSG00000087274;ENSG00000092820;ENSG00000096872;ENSG00000100106;ENSG00000100644;ENSG00000101384;ENSG00000101445;ENSG00000102531;ENSG00000102554;ENSG00000104067…
GO:0050918	positive chemotaxis	-0.297239	-1.41747	0.0634146	0.179602	35	35	4916;8846;2277;11151;5155;4088;6376;3082;4233;2152;1012;2255;10457;5228;2252;5365;284;7422;2247;3791;285;7857;9037;1901;8829;7424;6387;64221;3603;3148;7423;23513;7474;7249;5795	ENSG00000006210;ENSG00000019991;ENSG00000070193;ENSG00000091879;ENSG00000099250;ENSG00000100311;ENSG00000100601;ENSG00000102879;ENSG00000103197;ENSG00000105976;ENSG00000107562;ENSG00000112715;ENSG00000112902;ENSG00000114251;ENSG00000117525;ENSG00000119630;ENSG00000128052;ENSG00000136235;ENSG00000138685;ENSG00000140285;ENSG00000140538;ENSG00000140945;ENSG00000149177;ENSG00000150630;ENSG00000154134…
GO:2000027	regulation of animal organ morphogenesis	-0.212062	-1.42007	0.0325444	0.179783	147	51	84133;10498;89958;166336;55679;22881;3516;8324;4300;5764;6431;2119;182;860;6091;6256;409;55959;5154;54903;25;54880;7474;7074;219736;596;7042;2260;2239;657;1856;54806;2138;8837;998;23002;10818;55727;1857;10427;387;9968;5879;64750;90;6259;4089;5469;9863;57154;4781	ENSG00000003402;ENSG00000004975;ENSG00000011114;ENSG00000011143;ENSG00000067560;ENSG00000070831;ENSG00000072163;ENSG00000076716;ENSG00000077782;ENSG00000092969;ENSG00000097007;ENSG00000100592;ENSG00000101384;ENSG00000104313;ENSG00000105894;ENSG00000107779;ENSG00000108854;ENSG00000114251;ENSG00000115170;ENSG00000124193;ENSG00000124813;ENSG00000125686;ENSG00000135299;ENSG00000135541;ENSG00000136238…
GO:0051647	nucleus localization	-0.355827	-1.42095	0.084507	0.180253	20	10	23224;85440;274;547;199953;5108;153241;5747;23353;84376	ENSG00000054654;ENSG00000078674;ENSG00000116641;ENSG00000130294;ENSG00000136717;ENSG00000164828;ENSG00000168172;ENSG00000168944;ENSG00000169398;ENSG00000188807
GO:0009791	post-embryonic development	-0.243505	-1.41814	0.0497382	0.180371	76	20	596;26058;23334;8879;48;57003;55553;3150;93;27148;10765;50515;3482;27230;27161;546;4087;4204;23515;55870	ENSG00000085224;ENSG00000108588;ENSG00000110693;ENSG00000114739;ENSG00000116539;ENSG00000117139;ENSG00000120742;ENSG00000122729;ENSG00000123908;ENSG00000159256;ENSG00000163482;ENSG00000166224;ENSG00000169057;ENSG00000171310;ENSG00000171791;ENSG00000175387;ENSG00000197081;ENSG00000198198;ENSG00000204120;ENSG00000205581
GO:0060039	pericardium development	-0.41165	-1.4103	0.0846682	0.18631	14	7	57493;7474;4040;23322;29072;6654;4087	ENSG00000070018;ENSG00000103494;ENSG00000114251;ENSG00000115904;ENSG00000173706;ENSG00000175387;ENSG00000181555
GO:0048144	fibroblast proliferation	-0.249719	-1.40832	0.0458221	0.186913	67	24	2335;1021;1019;5828;81857;5074;2495;5156;5154;7474;64319;3725;57178;2010;80169;6497;10269;2621;79577;5591;23063;1385;1660;23515	ENSG00000062650;ENSG00000084073;ENSG00000102119;ENSG00000104973;ENSG00000105810;ENSG00000108175;ENSG00000114251;ENSG00000115414;ENSG00000118260;ENSG00000134371;ENSG00000134853;ENSG00000135446;ENSG00000135829;ENSG00000156860;ENSG00000157933;ENSG00000159256;ENSG00000164751;ENSG00000167996;ENSG00000177425;ENSG00000177606;ENSG00000178971;ENSG00000183087;ENSG00000197461;ENSG00000253729
GO:0042692	muscle cell differentiation	-0.190011	-1.40483	0.0140351	0.187995	249	93	5629;57462;4303;90342;575;5159;25776;663;1495;54910;50937;6929;57591;3475;23135;55909;3516;8324;9043;7273;9750;10529;4703;274;84033;3488;23345;91653;836;26263;2146;5156;6256;824;409;6095;64855;80206;25;5914;6722;9149;596;51177;23363;6935;8470;6272;1756;8837;811;9794;4775;9150;55553;11214;998;1000;10818;1760;2648;6497;27250;10269;25842;6444;9759;5725;57190;607;6830;29766;4627;3192;90;5925;207;6443…	ENSG00000003402;ENSG00000006652;ENSG00000008294;ENSG00000011304;ENSG00000023902;ENSG00000044115;ENSG00000060069;ENSG00000064309;ENSG00000068024;ENSG00000069667;ENSG00000070831;ENSG00000071127;ENSG00000071564;ENSG00000072736;ENSG00000078114;ENSG00000082014;ENSG00000084073;ENSG00000096717;ENSG00000097007;ENSG00000100211;ENSG00000100345;ENSG00000104936;ENSG00000105204;ENSG00000106462;ENSG00000108773…
GO:0003158	endothelium development	-0.226793	-1.40089	0.0383632	0.188016	95	56	5962;5138;3791;654;2947;4478;5912;4851;9076;1901;7716;8829;10411;28514;80781;3911;26051;8985;55273;5175;7132;153562;2022;50848;7430;5144;90627;7082;5629;1903;388;26084;23135;3516;57493;694;6093;5764;25865;4659;182;3551;51735;5906;6935;5802;55810;57826;93;387;5908;118;90;2889;4089;4301	ENSG00000058272;ENSG00000065970;ENSG00000067182;ENSG00000067560;ENSG00000067900;ENSG00000079337;ENSG00000087274;ENSG00000092820;ENSG00000099250;ENSG00000101384;ENSG00000101445;ENSG00000104067;ENSG00000104365;ENSG00000105287;ENSG00000105426;ENSG00000105894;ENSG00000106397;ENSG00000106991;ENSG00000107263;ENSG00000113448;ENSG00000114739;ENSG00000114790;ENSG00000115170;ENSG00000116473;ENSG00000117707…
GO:1990823	response to leukemia inhibitory factor	-0.232564	-1.40598	0.0531915	0.188056	85	39	84159;5990;6723;2731;5371;22904;6217;5916;9945;5080;54956;10253;165324;5277;11107;22808;1840;55818;4144;6432;57539;1488;4691;5826;221830;51444;8467;587;51660;10765;3192;23522;8726;3720;55892;23411;1385;55183;9774	ENSG00000007372;ENSG00000008083;ENSG00000029363;ENSG00000060762;ENSG00000064932;ENSG00000074266;ENSG00000080345;ENSG00000085274;ENSG00000087903;ENSG00000096717;ENSG00000105193;ENSG00000105552;ENSG00000105849;ENSG00000115053;ENSG00000115548;ENSG00000115875;ENSG00000116649;ENSG00000117139;ENSG00000118260;ENSG00000118965;ENSG00000119688;ENSG00000131459;ENSG00000134758;ENSG00000135144;ENSG00000136158…
GO:0044772	mitotic cell cycle phase transition	-0.17643	-1.4026	0	0.189146	402	121	55835;1263;1781;11170;5426;10106;2146;219771;29997;23133;56257;4172;4678;55795;4957;5111;6154;7508;11064;571;9702;219736;51547;4194;3550;1654;596;3275;26058;835;1785;994;79960;55031;2273;11116;84131;5108;1453;4849;7175;10806;6659;51343;8493;25949;641;9150;23476;8481;6502;80184;8452;8558;5933;5885;1642;80169;9125;51379;4331;22919;6873;5934;57521;5932;5116;3364;143384;5311;5422;29766;10142;4848;611…	ENSG00000005483;ENSG00000010244;ENSG00000020426;ENSG00000020922;ENSG00000022267;ENSG00000036257;ENSG00000046651;ENSG00000047410;ENSG00000053254;ENSG00000054282;ENSG00000060069;ENSG00000064313;ENSG00000074054;ENSG00000077380;ENSG00000077684;ENSG00000078674;ENSG00000079805;ENSG00000080802;ENSG00000080839;ENSG00000082014;ENSG00000086827;ENSG00000088038;ENSG00000100393;ENSG00000101224;ENSG00000101367…
GO:0033687	osteoblast proliferation	-0.351222	-1.40122	0.0969267	0.189229	21	21	4745;51374;4088;650;115908;4883;338773;10855;3726;6422;3491;26585;30812;5364;2263;3685;25;596;63979;5610;387	ENSG00000005513;ENSG00000055332;ENSG00000066468;ENSG00000067560;ENSG00000097007;ENSG00000104332;ENSG00000113389;ENSG00000125845;ENSG00000132436;ENSG00000138085;ENSG00000138448;ENSG00000142871;ENSG00000164050;ENSG00000164932;ENSG00000165973;ENSG00000166923;ENSG00000166949;ENSG00000171223;ENSG00000171791;ENSG00000173083;ENSG00000183160
GO:0031532	actin cytoskeleton reorganization	-0.234962	-1.39814	0.0426667	0.189931	83	28	221692;55971;4739;5156;2017;25;4289;23043;5898;396;6464;23607;9564;84062;2316;27;123720;998;5770;387;8394;26037;26053;4627;2241;50488;9855;9578	ENSG00000006451;ENSG00000006453;ENSG00000006607;ENSG00000047579;ENSG00000050820;ENSG00000067560;ENSG00000070831;ENSG00000085733;ENSG00000097007;ENSG00000100345;ENSG00000111859;ENSG00000112137;ENSG00000128585;ENSG00000134853;ENSG00000141503;ENSG00000141522;ENSG00000143322;ENSG00000143398;ENSG00000151422;ENSG00000154310;ENSG00000156232;ENSG00000158321;ENSG00000160691;ENSG00000196396;ENSG00000196924…
GO:0019058	viral life cycle	0.226444	1.44622	0.0187793	0.196883	185	60	2060;440275;6733;5861;9217;3839;7415;9397;9218;1508;57617;3836;51193;137492;6780;51510;7251;1487;9475;5868;3312;5034;55337;51534;201626;3416;83737;91782;5886;81876;51763;2332;27243;10542;27183;7405;3326;9525;55054;5071;64848;3837;57132;25827;51271;5901;8724;9474;128866;6732;5119;5481;7342;10450;22954;7314;23087;10572;25978;29883	ENSG00000009844;ENSG00000047188;ENSG00000057663;ENSG00000074319;ENSG00000078747;ENSG00000083937;ENSG00000084072;ENSG00000085832;ENSG00000085978;ENSG00000086065;ENSG00000096063;ENSG00000096384;ENSG00000101421;ENSG00000101558;ENSG00000102081;ENSG00000102753;ENSG00000104142;ENSG00000104228;ENSG00000108424;ENSG00000109971;ENSG00000112335;ENSG00000114030;ENSG00000119401;ENSG00000119541;ENSG00000119912…
GO:0048732	gland development	-0.181205	-1.38896	0.00362319	0.198893	299	75	4513;2146;5156;57045;6091;10018;6256;23513;55959;5154;25;5111;7474;5914;2737;6722;5253;57539;79971;6599;6143;596;394;538;4040;7042;2260;5906;657;3725;5970;171023;7049;8837;382;7372;1605;998;8452;80169;10818;55727;23322;10269;7392;5311;8660;10765;87178;2909;3720;50;3482;5591;26019;11231;207;6430;7067;208;3184;7919;22890;4089;5087;1385;6426;3643;4087;6670;5469;4781;5894;55870;9113	ENSG00000003402;ENSG00000008083;ENSG00000011114;ENSG00000025796;ENSG00000036257;ENSG00000069702;ENSG00000070018;ENSG00000070831;ENSG00000077782;ENSG00000084073;ENSG00000092969;ENSG00000097007;ENSG00000100412;ENSG00000100650;ENSG00000100852;ENSG00000103494;ENSG00000105221;ENSG00000105698;ENSG00000106462;ENSG00000106571;ENSG00000107779;ENSG00000108298;ENSG00000112658;ENSG00000114251;ENSG00000114491…
GO:0051702	interaction with symbiont	-0.266556	-1.38317	0.0825243	0.202859	47	17	6882;5479;6598;3725;9126;8812;64710;9150;1642;23076;6597;23435;1105;904;2033;128637;10910	ENSG00000060069;ENSG00000064995;ENSG00000069275;ENSG00000090061;ENSG00000099956;ENSG00000100393;ENSG00000108055;ENSG00000120948;ENSG00000125875;ENSG00000127616;ENSG00000129315;ENSG00000153922;ENSG00000160208;ENSG00000165416;ENSG00000166794;ENSG00000167986;ENSG00000177606
GO:0048705	skeletal system morphogenesis	-0.207147	-1.38415	0.0318841	0.203144	146	89	302;7373;4920;9241;64856;57642;6422;1690;1749;642658;7040;26585;5396;4323;4487;7043;654;7703;9249;51435;4313;6662;2261;1291;1293;658;64651;3373;4041;80199;4147;85301;2263;7483;5027;7010;3636;655;6664;649;84159;2201;4665;7289;5916;10498;5310;5663;51715;157506;25976;2734;158326;83452;1739;860;5156;4664;55790;5914;2737;4040;2260;9321;22856;6935;57453;29123;8879;7059;2138;93;285590;51741;57728;6497;9…	ENSG00000008710;ENSG00000010361;ENSG00000053254;ENSG00000066468;ENSG00000068078;ENSG00000070018;ENSG00000070614;ENSG00000075711;ENSG00000077782;ENSG00000078246;ENSG00000080815;ENSG00000084073;ENSG00000087245;ENSG00000089041;ENSG00000090863;ENSG00000100473;ENSG00000100714;ENSG00000100815;ENSG00000101144;ENSG00000101203;ENSG00000104313;ENSG00000104332;ENSG00000105329;ENSG00000105880;ENSG00000106571…
GO:0099003	vesicle-mediated transport in synapse	0.222744	1.43851	0.0209895	0.204528	185	121	22930;2060;23208;55737;10059;84896;64854;57617;5533;29058;163;8766;9581;5868;282991;2580;80331;115548;65018;2932;26258;26052;10947;8674;488;2332;10228;375;1861;5071;84961;673;26985;9900;10239;22871;1176;27445;9829;6453;321;93664;120892;50632;63915;5217;9699;8775;8867;1609;22999;10815;5532;9162;6843;63908;10497;8541;6860;22883;10814;6844;6861;9751;6855;84258;116841;5864;6809;8499;1141;1499;23285;2…	ENSG00000006125;ENSG00000008056;ENSG00000011347;ENSG00000019505;ENSG00000034053;ENSG00000041353;ENSG00000067715;ENSG00000069329;ENSG00000070087;ENSG00000070718;ENSG00000070808;ENSG00000074317;ENSG00000078018;ENSG00000078053;ENSG00000079841;ENSG00000081803;ENSG00000082701;ENSG00000085832;ENSG00000087470;ENSG00000089063;ENSG00000099365;ENSG00000101098;ENSG00000101152;ENSG00000101204;ENSG00000101298…
GO:0050000	chromosome localization	0.284964	1.43333	0.0594228	0.208829	53	20	8678;23636;51510;8766;150465;283489;8697;81565;10097;91782;27243;27183;9525;3837;57132;1778;81929;128866;5119;3835	ENSG00000079616;ENSG00000085415;ENSG00000086065;ENSG00000094880;ENSG00000101421;ENSG00000103769;ENSG00000108424;ENSG00000114999;ENSG00000119541;ENSG00000126581;ENSG00000130724;ENSG00000131165;ENSG00000132612;ENSG00000138071;ENSG00000147457;ENSG00000166579;ENSG00000197102;ENSG00000198824;ENSG00000213024;ENSG00000255112
GO:0006515	protein quality control for misfolded or incompletely synthesized proteins	0.341778	1.42694	0.0907534	0.212452	27	11	10730;55768;7415;64839;4287;79139;1861;10273;55658;55284;9361	ENSG00000066427;ENSG00000070423;ENSG00000103266;ENSG00000104343;ENSG00000136758;ENSG00000136827;ENSG00000136986;ENSG00000145743;ENSG00000151092;ENSG00000165280;ENSG00000196365
GO:0007210	serotonin receptor signaling pathway	0.395293	1.42753	0.0926573	0.214303	17	17	3355;3361;1128;1129;3363;1131;3269;3274;1132;3351;3356;3362;3350;3358;3359;3360;11255	ENSG00000101180;ENSG00000102468;ENSG00000113749;ENSG00000133019;ENSG00000135312;ENSG00000147246;ENSG00000148680;ENSG00000157219;ENSG00000158748;ENSG00000164270;ENSG00000166736;ENSG00000168539;ENSG00000178394;ENSG00000179097;ENSG00000180720;ENSG00000181072;ENSG00000196639
GO:0003007	heart morphogenesis	-0.196549	-1.37153	0.0356083	0.214859	180	48	10395;585;182;8751;6091;6256;54903;57534;7474;5914;6722;60485;7042;10454;23363;196528;129880;657;1856;3725;171023;54806;57178;2138;7049;6659;79633;51684;54583;10277;10427;27250;10269;5311;5747;25836;7403;90;200894;4193;26160;4089;7468;6604;6654;3643;5469;26005	ENSG00000004975;ENSG00000011143;ENSG00000069702;ENSG00000082014;ENSG00000084073;ENSG00000092969;ENSG00000100324;ENSG00000101384;ENSG00000101752;ENSG00000104313;ENSG00000107779;ENSG00000107882;ENSG00000108175;ENSG00000109685;ENSG00000112658;ENSG00000114251;ENSG00000115170;ENSG00000115904;ENSG00000118762;ENSG00000124006;ENSG00000124766;ENSG00000125686;ENSG00000130939;ENSG00000131759;ENSG00000135541…
GO:1903706	regulation of hemopoiesis	-0.184809	-1.36762	0.00671141	0.215101	265	54	6988;6935;2551;7189;9757;54623;3725;8943;57178;192669;8767;865;27327;10443;5610;96459;10519;58508;22985;54892;2648;387;7030;123169;2621;1387;192670;201163;10401;9646;79577;29843;5925;149041;5977;8085;26523;57630;8737;4297;2033;22890;29102;1385;79576;57690;6654;55904;5469;25942;23112;9092;405;4850	ENSG00000005339;ENSG00000005483;ENSG00000006712;ENSG00000055332;ENSG00000055609;ENSG00000065000;ENSG00000067560;ENSG00000067955;ENSG00000068323;ENSG00000078687;ENSG00000079387;ENSG00000080802;ENSG00000090905;ENSG00000092847;ENSG00000100354;ENSG00000100393;ENSG00000100813;ENSG00000101882;ENSG00000104312;ENSG00000108175;ENSG00000108773;ENSG00000113360;ENSG00000115904;ENSG00000118058;ENSG00000118260…
GO:0051193	regulation of cofactor metabolic process	-0.244939	-1.36957	0.0668317	0.215915	60	15	5562;51422;10891;255027;2534;957;5879;9759;8473;339123;10013;3643;9611;11319;405	ENSG00000010810;ENSG00000068024;ENSG00000094631;ENSG00000106617;ENSG00000109819;ENSG00000122882;ENSG00000132356;ENSG00000136238;ENSG00000141027;ENSG00000143437;ENSG00000147162;ENSG00000156968;ENSG00000161999;ENSG00000171105;ENSG00000187097
GO:0008544	epidermis development	-0.196351	-1.36831	0.0471698	0.215945	177	84	3664;28514;10413;5318;3911;11078;80199;8323;8985;2263;29841;23022;5465;3624;3065;57216;5454;4038;4647;1513;9497;5727;7454;4665;55504;55366;8502;2171;3516;5080;9750;7027;6093;11166;1824;224;6431;3909;3488;3728;54206;836;147495;220074;182;2317;2146;4926;54888;23513;5154;4664;8754;7474;23254;60485;81858;596;5351;538;7042;2260;5970;8609;8643;865;64434;10427;10269;51057;8394;80173;55506;8202;26160;207…	ENSG00000007372;ENSG00000010361;ENSG00000015285;ENSG00000033867;ENSG00000037474;ENSG00000053747;ENSG00000057294;ENSG00000066468;ENSG00000067900;ENSG00000067955;ENSG00000072210;ENSG00000077782;ENSG00000083444;ENSG00000084073;ENSG00000092969;ENSG00000096872;ENSG00000099284;ENSG00000100106;ENSG00000101109;ENSG00000101384;ENSG00000106397;ENSG00000106462;ENSG00000111913;ENSG00000113648;ENSG00000114251…
GO:0051321	meiotic cell cycle	-0.205567	-1.37199	0.038674	0.215987	149	46	4926;80198;54888;56339;7474;84501;9665;9897;85378;10734;8243;7156;994;9126;4437;63979;27030;84464;7013;4292;51343;811;641;10179;10096;7917;5885;4882;5932;3364;7155;3297;192670;23304;4627;6117;4361;4683;9183;23063;2956;23353;3643;546;23310;24149	ENSG00000020922;ENSG00000024048;ENSG00000037474;ENSG00000062650;ENSG00000066923;ENSG00000072501;ENSG00000076053;ENSG00000076242;ENSG00000077097;ENSG00000085224;ENSG00000086827;ENSG00000100345;ENSG00000101224;ENSG00000101773;ENSG00000104320;ENSG00000105325;ENSG00000108055;ENSG00000113318;ENSG00000114251;ENSG00000115091;ENSG00000116062;ENSG00000119684;ENSG00000128159;ENSG00000132383;ENSG00000132436…
GO:0048880	sensory system development	-0.180843	-1.35762	0.012987	0.221465	260	102	6297;655;6664;4647;6657;79583;81029;5629;2201;9839;2200;1181;5159;130557;4094;7289;23287;54549;3091;50937;5916;84465;22989;86;5663;2195;5080;3913;4915;1019;84678;10461;157506;5764;4867;65979;8412;4771;1739;27077;585;182;57381;5156;57045;6256;23094;7101;10220;23418;7474;5914;2737;6722;2055;2782;261734;596;5316;4040;7042;4810;1282;6935;112724;835;26146;3725;54806;57545;56890;51343;204851;3150;93;80…	ENSG00000007372;ENSG00000048342;ENSG00000064309;ENSG00000069188;ENSG00000070018;ENSG00000075711;ENSG00000078246;ENSG00000078369;ENSG00000080815;ENSG00000082014;ENSG00000083857;ENSG00000088930;ENSG00000089094;ENSG00000092969;ENSG00000100644;ENSG00000101144;ENSG00000101384;ENSG00000103494;ENSG00000105325;ENSG00000105738;ENSG00000105894;ENSG00000106144;ENSG00000106571;ENSG00000108641;ENSG00000111186…
GO:0007031	peroxisome organization	0.267453	1.41882	0.0622951	0.221721	66	26	5824;10059;8504;5830;5194;55825;4358;1384;56947;8540;5193;219743;3416;10005;65084;5189;5264;5191;54677;26061;7314;7322;8799;51024;9409;7321	ENSG00000005469;ENSG00000018510;ENSG00000034693;ENSG00000072401;ENSG00000087470;ENSG00000095321;ENSG00000101473;ENSG00000107537;ENSG00000108733;ENSG00000112357;ENSG00000115204;ENSG00000115425;ENSG00000119912;ENSG00000121680;ENSG00000127980;ENSG00000131373;ENSG00000131508;ENSG00000131779;ENSG00000139197;ENSG00000156521;ENSG00000162735;ENSG00000162928;ENSG00000166575;ENSG00000168958;ENSG00000170315…
GO:0002285	lymphocyte activation involved in immune response	-0.22369	-1.35771	0.0644258	0.222985	89	25	6095;25;5914;7374;10892;3916;538;55846;165918;4292;8767;22976;200558;23075;51010;54537;6830;4683;149041;7248;2956;9984;7468;55183;7158	ENSG00000067369;ENSG00000069667;ENSG00000076242;ENSG00000076248;ENSG00000079134;ENSG00000080345;ENSG00000097007;ENSG00000104312;ENSG00000104320;ENSG00000107371;ENSG00000109111;ENSG00000109685;ENSG00000111203;ENSG00000116062;ENSG00000122376;ENSG00000131759;ENSG00000133789;ENSG00000135870;ENSG00000157212;ENSG00000163961;ENSG00000165240;ENSG00000165699;ENSG00000169621;ENSG00000172175;ENSG00000185896
GO:0006471	protein ADP-ribosylation	-0.301265	-1.35957	0.115023	0.223673	30	9	10039;142;8658;11284;80351;56965;9933;23411;23394	ENSG00000039650;ENSG00000041880;ENSG00000080608;ENSG00000096717;ENSG00000101126;ENSG00000107854;ENSG00000137817;ENSG00000143799;ENSG00000173273
GO:0001503	ossification	-0.184246	-1.35772	0.0138889	0.224602	274	162	3726;1490;1462;3397;3400;1050;1969;7071;9902;9636;4920;9241;2662;6422;5734;1749;3491;642658;1956;7040;51176;26585;4921;30812;202151;4323;6608;7043;654;4958;5745;4091;22801;5978;4851;9249;4313;6662;2261;3479;1291;4330;6238;1901;658;5364;4041;3570;2736;54829;2131;64093;8321;54857;2263;5027;7010;10766;847;1836;4038;3636;655;10140;6664;6657;1513;92;7704;3572;649;6261;196527;3295;2201;5727;55589;84059…	ENSG00000005513;ENSG00000011028;ENSG00000014123;ENSG00000017427;ENSG00000038427;ENSG00000046653;ENSG00000061273;ENSG00000064932;ENSG00000066468;ENSG00000067560;ENSG00000067955;ENSG00000068024;ENSG00000068078;ENSG00000074047;ENSG00000084073;ENSG00000084093;ENSG00000086712;ENSG00000087245;ENSG00000089041;ENSG00000092969;ENSG00000094975;ENSG00000100644;ENSG00000101144;ENSG00000101384;ENSG00000102882…
GO:0030099	myeloid cell differentiation	-0.18111	-1.35287	0.0255591	0.226511	278	57	2551;7189;9757;54623;3725;192669;8444;7049;865;27327;55553;10519;7994;142;998;58508;22985;23054;54892;7030;9991;123169;9644;23218;1387;192670;29766;10401;9646;4627;79577;118;10006;54790;29843;5925;9855;8085;26523;7067;8737;4297;2033;23411;1385;79576;57690;6670;5926;8761;55904;5469;9948;25942;23112;405;4850	ENSG00000005339;ENSG00000005483;ENSG00000006607;ENSG00000006712;ENSG00000032219;ENSG00000055609;ENSG00000067955;ENSG00000068323;ENSG00000069702;ENSG00000070831;ENSG00000071127;ENSG00000078687;ENSG00000079387;ENSG00000080802;ENSG00000083168;ENSG00000087274;ENSG00000090621;ENSG00000090905;ENSG00000092847;ENSG00000096717;ENSG00000100345;ENSG00000100354;ENSG00000100393;ENSG00000100813;ENSG00000101882…
GO:0030901	midbrain development	-0.243924	-1.34648	0.0976253	0.232224	63	19	7474;59345;79971;4040;2260;9919;1453;9231;998;2648;387;60;6259;3340;80853;7531;6654;79109;64770	ENSG00000006459;ENSG00000067560;ENSG00000070018;ENSG00000070614;ENSG00000070831;ENSG00000075624;ENSG00000077782;ENSG00000108773;ENSG00000108953;ENSG00000114251;ENSG00000114450;ENSG00000115904;ENSG00000116729;ENSG00000119487;ENSG00000141551;ENSG00000148396;ENSG00000151208;ENSG00000163785;ENSG00000175455
GO:0006513	protein monoubiquitination	-0.24022	-1.3472	0.0774648	0.233045	64	28	57697;84678;90025;55120;4734;84333;23295;54880;867;54623;56254;165918;84108;54926;8452;1642;10277;123169;9646;6015;79577;10075;9810;51322;7323;10210;10336;23429	ENSG00000006712;ENSG00000036257;ENSG00000069869;ENSG00000086758;ENSG00000089094;ENSG00000095787;ENSG00000102858;ENSG00000103549;ENSG00000107341;ENSG00000109332;ENSG00000110395;ENSG00000115392;ENSG00000118420;ENSG00000130939;ENSG00000134371;ENSG00000155827;ENSG00000156374;ENSG00000163602;ENSG00000163961;ENSG00000166477;ENSG00000167986;ENSG00000180628;ENSG00000183337;ENSG00000185619;ENSG00000187790…
GO:1901615	organic hydroxy compound metabolic process	0.202535	1.4037	0.00970874	0.24186	318	105	284161;6309;55737;57704;51573;51109;3029;7436;81537;6713;55163;2230;54928;9784;222236;6715;1718;55825;80025;4779;25953;84869;2222;5007;6647;51141;158219;3705;56848;10005;11315;51763;31;197257;5092;9562;136319;2224;134429;51706;128;5447;5071;3837;79947;64801;4802;220;51447;9108;8813;351;403313;6721;4952;9807;5901;8720;5641;8604;9693;114876;22937;4598;23236;4801;79071;1798;50814;8898;285671;6653;54…	ENSG00000000419;ENSG00000003137;ENSG00000003987;ENSG00000006007;ENSG00000012174;ENSG00000050165;ENSG00000063176;ENSG00000063854;ENSG00000066136;ENSG00000067064;ENSG00000068745;ENSG00000069329;ENSG00000070610;ENSG00000072042;ENSG00000074660;ENSG00000078237;ENSG00000079156;ENSG00000079459;ENSG00000082641;ENSG00000085662;ENSG00000087053;ENSG00000090054;ENSG00000100600;ENSG00000100605;ENSG00000101473…
GO:0043473	pigmentation	0.26327	1.39822	0.0480132	0.241888	72	15	372;5861;10540;1130;84079;8455;8766;65082;164;9896;10159;4763;282991;26258;89781	ENSG00000088812;ENSG00000095139;ENSG00000100099;ENSG00000103769;ENSG00000104164;ENSG00000105186;ENSG00000112367;ENSG00000138069;ENSG00000139719;ENSG00000143669;ENSG00000166747;ENSG00000175203;ENSG00000182220;ENSG00000196072;ENSG00000196712
GO:0031929	TOR signaling	0.246102	1.39948	0.0548589	0.242632	98	34	26268;93627;140775;5290;10325;27244;2475;84861;64083;6198;65018;8550;64121;55654;8649;167359;6009;9681;6794;10542;10670;197131;54468;144577;253260;6396;10641;81929;8841;153129;9675;64223;261726;55004	ENSG00000080546;ENSG00000083750;ENSG00000085415;ENSG00000089022;ENSG00000099910;ENSG00000100150;ENSG00000101407;ENSG00000106615;ENSG00000108443;ENSG00000109270;ENSG00000112146;ENSG00000113384;ENSG00000114388;ENSG00000116954;ENSG00000118046;ENSG00000121879;ENSG00000134248;ENSG00000135956;ENSG00000143155;ENSG00000145348;ENSG00000149357;ENSG00000155876;ENSG00000157020;ENSG00000158828;ENSG00000159459…
GO:0006490	oligosaccharide-lipid intermediate biosynthetic process	0.383611	1.39217	0.113514	0.244063	17	11	85365;199857;9526;79947;57171;1798;10195;79644;116150;4597;22845	ENSG00000117682;ENSG00000119523;ENSG00000128039;ENSG00000129255;ENSG00000153989;ENSG00000167130;ENSG00000167508;ENSG00000172269;ENSG00000172339;ENSG00000175283;ENSG00000214160
GO:1903513	endoplasmic reticulum to cytosol transport	0.339906	1.39513	0.100176	0.244371	27	10	27248;10134;6400;7415;23197;55432;79139;550;10956;51465	ENSG00000068912;ENSG00000071537;ENSG00000113194;ENSG00000115307;ENSG00000135506;ENSG00000136986;ENSG00000165280;ENSG00000180667;ENSG00000185825;ENSG00000198833
GO:0043648	dicarboxylic acid metabolic process	0.251483	1.39361	0.0513219	0.244426	79	41	1743;4967;4942;435;2271;2730;10005;5264;159;5832;25902;8802;8803;4191;8604;4190;1738;23057;6390;6389;56954;2806;85300;92259;6770;79944;10873;2805;9380;3417;56267;2744;160428;445;2356;7915;27165;2686;6472;57001;47	ENSG00000014641;ENSG00000023909;ENSG00000035687;ENSG00000059573;ENSG00000065154;ENSG00000073578;ENSG00000087299;ENSG00000091140;ENSG00000091483;ENSG00000101473;ENSG00000105953;ENSG00000107537;ENSG00000112294;ENSG00000114021;ENSG00000115419;ENSG00000115840;ENSG00000117118;ENSG00000119689;ENSG00000120053;ENSG00000120254;ENSG00000125166;ENSG00000126522;ENSG00000130707;ENSG00000131067;ENSG00000131473…
GO:1903829	positive regulation of cellular protein localization	0.203742	1.39951	0.0211268	0.245451	270	88	5494;2181;10134;23208;9270;10204;908;84455;54471;57142;9520;1432;54828;23636;56681;10574;11143;3717;11235;6950;163;55754;22948;7203;7251;22902;8766;9475;3265;56947;637;9747;5621;65018;2932;2770;11079;4836;10694;11315;55696;10576;89781;11261;6794;51496;55823;9777;10445;10575;3326;26354;5071;1540;9847;26229;4137;6721;8882;23171;8841;9776;1894;10055;4248;51128;7529;3843;6653;1736;636;118424;120892;5…	ENSG00000006125;ENSG00000015475;ENSG00000018189;ENSG00000065150;ENSG00000072062;ENSG00000074319;ENSG00000079332;ENSG00000082701;ENSG00000083799;ENSG00000086589;ENSG00000096384;ENSG00000096968;ENSG00000100030;ENSG00000100099;ENSG00000100335;ENSG00000100614;ENSG00000101337;ENSG00000102898;ENSG00000103769;ENSG00000104231;ENSG00000104904;ENSG00000107560;ENSG00000107643;ENSG00000109917;ENSG00000111731…
GO:0061614	pri-miRNA transcription by RNA polymerase II	-0.276689	-1.33495	0.0967742	0.246908	37	19	4776;5465;6774;6688;688;3091;7003;4086;6722;7042;657;3725;5970;4775;9759;1655;6597;4089;4781	ENSG00000066336;ENSG00000068024;ENSG00000072736;ENSG00000092969;ENSG00000100644;ENSG00000100968;ENSG00000102554;ENSG00000107779;ENSG00000108654;ENSG00000112658;ENSG00000127616;ENSG00000141646;ENSG00000147862;ENSG00000168610;ENSG00000170365;ENSG00000173039;ENSG00000177606;ENSG00000186951;ENSG00000187079
