# Supplementary material for: Systematical comparison reveals distinct brain transcriptomic features in models of depression induced by gut microbiota dysbiosis and chronic stress
Source: Research Square preprint supplement (doi:10.21203/rs.3.rs-4134877/v1), 2024-03-29
Supplement: Supplementary file 3 [file 2c8617a9dfc3fb0ac3aadd94.xlsx]

## Sheet: F3.module
Cluster	category	term ID	term description	observed gene count	background gene count	strength	false discovery rate	matching proteins in your network (IDs)	matching proteins in your network (labels)
1	GO Process	GO:0048709	Oligodendrocyte differentiation	11	79	2.16	1.09e-17	9606.ENSP00000293894,9606.ENSP00000310880,9606.ENSP00000331040,9606.ENSP00000357581,9606.ENSP00000366347,9606.ENSP00000371785,9606.ENSP00000377470,9606.ENSP00000380093,9606.ENSP00000442982,9606.ENSP00000462269,9606.ENSP00000481006	SOX8,MAL,OLIG2,NKX6-2,NKX2-2,OLIG1,CNP,SOX10,GPR17,ZNF488,PLP1
1	GO Process	GO:0014003	Oligodendrocyte development	7	43	2.23	8.4e-11	9606.ENSP00000310880,9606.ENSP00000357581,9606.ENSP00000366347,9606.ENSP00000371785,9606.ENSP00000380093,9606.ENSP00000462269,9606.ENSP00000481006	MAL,NKX6-2,NKX2-2,OLIG1,SOX10,ZNF488,PLP1
1	GO Process	GO:0008366	Axon ensheathment	8	116	1.85	4.35e-10	9606.ENSP00000064724,9606.ENSP00000219207,9606.ENSP00000310880,9606.ENSP00000331040,9606.ENSP00000357581,9606.ENSP00000379290,9606.ENSP00000380093,9606.ENSP00000481006	CLDN11,PLLP,MAL,OLIG2,NKX6-2,BCAS1,SOX10,PLP1
1	GO Process	GO:0007399	Nervous system development	16	2188	0.88	8.82e-10	9606.ENSP00000064724,9606.ENSP00000219207,9606.ENSP00000293894,9606.ENSP00000310880,9606.ENSP00000312293,9606.ENSP00000331040,9606.ENSP00000357581,9606.ENSP00000366091,9606.ENSP00000366347,9606.ENSP00000371785,9606.ENSP00000377470,9606.ENSP00000379290,9606.ENSP00000380093,9606.ENSP00000442982,9606.ENSP00000462269,9606.ENSP00000481006	CLDN11,PLLP,SOX8,MAL,MOBP,OLIG2,NKX6-2,MOG,NKX2-2,OLIG1,CNP,BCAS1,SOX10,GPR17,ZNF488,PLP1
1	GO Process	GO:0042552	Myelination	7	114	1.8	2.55e-08	9606.ENSP00000219207,9606.ENSP00000310880,9606.ENSP00000331040,9606.ENSP00000357581,9606.ENSP00000379290,9606.ENSP00000380093,9606.ENSP00000481006	PLLP,MAL,OLIG2,NKX6-2,BCAS1,SOX10,PLP1
1	GO Process	GO:0007417	Central nervous system development	12	1035	1.08	2.64e-08	9606.ENSP00000293894,9606.ENSP00000310880,9606.ENSP00000331040,9606.ENSP00000357581,9606.ENSP00000366091,9606.ENSP00000366347,9606.ENSP00000371785,9606.ENSP00000377470,9606.ENSP00000380093,9606.ENSP00000442982,9606.ENSP00000462269,9606.ENSP00000481006	SOX8,MAL,OLIG2,NKX6-2,MOG,NKX2-2,OLIG1,CNP,SOX10,GPR17,ZNF488,PLP1
1	GO Process	GO:0014015	Positive regulation of gliogenesis	6	66	1.97	7.14e-08	9606.ENSP00000293894,9606.ENSP00000331040,9606.ENSP00000357581,9606.ENSP00000366347,9606.ENSP00000380093,9606.ENSP00000462269	SOX8,OLIG2,NKX6-2,NKX2-2,SOX10,ZNF488
1	GO Process	GO:0048731	System development	17	3867	0.66	1.46e-07	9606.ENSP00000064724,9606.ENSP00000219207,9606.ENSP00000293894,9606.ENSP00000310880,9606.ENSP00000312293,9606.ENSP00000331040,9606.ENSP00000357581,9606.ENSP00000366091,9606.ENSP00000366347,9606.ENSP00000371785,9606.ENSP00000377470,9606.ENSP00000379290,9606.ENSP00000380093,9606.ENSP00000405577,9606.ENSP00000442982,9606.ENSP00000462269,9606.ENSP00000481006	CLDN11,PLLP,SOX8,MAL,MOBP,OLIG2,NKX6-2,MOG,NKX2-2,OLIG1,CNP,BCAS1,SOX10,CLMP,GPR17,ZNF488,PLP1
1	GO Process	GO:0048713	Regulation of oligodendrocyte differentiation	5	44	2.07	9.1e-07	9606.ENSP00000331040,9606.ENSP00000357581,9606.ENSP00000360214,9606.ENSP00000366347,9606.ENSP00000462269	OLIG2,NKX6-2,OPALIN,NKX2-2,ZNF488
1	GO Process	GO:0022010	Central nervous system myelination	4	23	2.26	9.32e-06	9606.ENSP00000310880,9606.ENSP00000357581,9606.ENSP00000380093,9606.ENSP00000481006	MAL,NKX6-2,SOX10,PLP1
1	GO Process	GO:0048714	Positive regulation of oligodendrocyte differentiation	4	26	2.2	1.24e-05	9606.ENSP00000331040,9606.ENSP00000357581,9606.ENSP00000366347,9606.ENSP00000462269	OLIG2,NKX6-2,NKX2-2,ZNF488
1	GO Process	GO:0021781	Glial cell fate commitment	3	12	2.41	0.0002	9606.ENSP00000293894,9606.ENSP00000331040,9606.ENSP00000366347	SOX8,OLIG2,NKX2-2
1	GO Process	GO:0048663	Neuron fate commitment	4	68	1.79	0.00033	9606.ENSP00000331040,9606.ENSP00000357581,9606.ENSP00000366347,9606.ENSP00000371785	OLIG2,NKX6-2,NKX2-2,OLIG1
1	GO Process	GO:0045165	Cell fate commitment	5	250	1.32	0.0017	9606.ENSP00000293894,9606.ENSP00000331040,9606.ENSP00000357581,9606.ENSP00000366347,9606.ENSP00000371785	SOX8,OLIG2,NKX6-2,NKX2-2,OLIG1
1	GO Process	GO:0048699	Generation of neurons	8	1131	0.87	0.0025	9606.ENSP00000293894,9606.ENSP00000331040,9606.ENSP00000357581,9606.ENSP00000366347,9606.ENSP00000371785,9606.ENSP00000377470,9606.ENSP00000380093,9606.ENSP00000481006	SOX8,OLIG2,NKX6-2,NKX2-2,OLIG1,CNP,SOX10,PLP1
1	GO Process	GO:0021530	Spinal cord oligodendrocyte cell fate specification	2	3	2.84	0.0039	9606.ENSP00000331040,9606.ENSP00000366347	OLIG2,NKX2-2
1	GO Process	GO:0048468	Cell development	9	1719	0.73	0.0053	9606.ENSP00000293894,9606.ENSP00000310880,9606.ENSP00000357581,9606.ENSP00000366347,9606.ENSP00000371785,9606.ENSP00000377470,9606.ENSP00000380093,9606.ENSP00000462269,9606.ENSP00000481006	SOX8,MAL,NKX6-2,NKX2-2,OLIG1,CNP,SOX10,ZNF488,PLP1
1	GO Process	GO:0031641	Regulation of myelination	3	48	1.81	0.0062	9606.ENSP00000357581,9606.ENSP00000380093,9606.ENSP00000462269	NKX6-2,SOX10,ZNF488
1	GO Process	GO:0048708	Astrocyte differentiation	3	61	1.71	0.0114	9606.ENSP00000293894,9606.ENSP00000366347,9606.ENSP00000481006	SOX8,NKX2-2,PLP1
1	GO Process	GO:0030182	Neuron differentiation	7	1062	0.83	0.0139	9606.ENSP00000293894,9606.ENSP00000331040,9606.ENSP00000357581,9606.ENSP00000366347,9606.ENSP00000371785,9606.ENSP00000377470,9606.ENSP00000481006	SOX8,OLIG2,NKX6-2,NKX2-2,OLIG1,CNP,PLP1
1	GO Process	GO:0045665	Negative regulation of neuron differentiation	3	75	1.62	0.0196	9606.ENSP00000293894,9606.ENSP00000331040,9606.ENSP00000366347	SOX8,OLIG2,NKX2-2
1	GO Process	GO:0003310	Pancreatic A cell differentiation	2	10	2.32	0.0201	9606.ENSP00000357581,9606.ENSP00000366347	NKX6-2,NKX2-2
1	GO Process	GO:0048484	Enteric nervous system development	2	15	2.14	0.0388	9606.ENSP00000293894,9606.ENSP00000380093	SOX8,SOX10
1	GO Function	GO:0019911	Structural constituent of myelin sheath	3	9	2.54	0.00082	9606.ENSP00000219207,9606.ENSP00000310880,9606.ENSP00000481006	PLLP,MAL,PLP1
1	GO Component	GO:0043209	Myelin sheath	3	45	1.84	0.0261	9606.ENSP00000219207,9606.ENSP00000377470,9606.ENSP00000481006	PLLP,CNP,PLP1
1	WikiPathways	WP4304	Oligodendrocyte specification and differentiation, leading to myelin components for CNS	8	30	2.44	5.03e-15	9606.ENSP00000293894,9606.ENSP00000331040,9606.ENSP00000366091,9606.ENSP00000366347,9606.ENSP00000371785,9606.ENSP00000377470,9606.ENSP00000380093,9606.ENSP00000481006	SOX8,OLIG2,MOG,NKX2-2,OLIG1,CNP,SOX10,PLP1
1	WikiPathways	WP2276	Glial cell differentiation	2	7	2.47	0.0123	9606.ENSP00000377470,9606.ENSP00000481006	CNP,PLP1
1	WikiPathways	WP2064	Neural crest differentiation	3	100	1.49	0.0329	9606.ENSP00000331040,9606.ENSP00000371785,9606.ENSP00000380093	OLIG2,OLIG1,SOX10
2	GO Process	GO:0031644	Regulation of nervous system process	6	145	1.71	1.07e-05	9606.ENSP00000305288,9606.ENSP00000316377,9606.ENSP00000392500,9606.ENSP00000439937,9606.ENSP00000477455,9606.ENSP00000497806	NLGN2,DLGAP1,NLGN1,HOMER3,GRIN2B,DLG4
2	GO Process	GO:0050804	Modulation of chemical synaptic transmission	8	436	1.35	1.07e-05	9606.ENSP00000305288,9606.ENSP00000316377,9606.ENSP00000358715,9606.ENSP00000392500,9606.ENSP00000439937,9606.ENSP00000477455,9606.ENSP00000495726,9606.ENSP00000497806	NLGN2,DLGAP1,SORCS3,NLGN1,HOMER3,GRIN2B,IQSEC2,DLG4
2	GO Process	GO:0099536	Synaptic signaling	8	456	1.33	1.07e-05	9606.ENSP00000221459,9606.ENSP00000225823,9606.ENSP00000258302,9606.ENSP00000305288,9606.ENSP00000316377,9606.ENSP00000392500,9606.ENSP00000477455,9606.ENSP00000497806	LIN7B,ASIC2,RGS8,NLGN2,DLGAP1,NLGN1,GRIN2B,DLG4
2	GO Process	GO:0099601	Regulation of neurotransmitter receptor activity	5	64	1.98	1.07e-05	9606.ENSP00000305288,9606.ENSP00000316377,9606.ENSP00000392500,9606.ENSP00000439937,9606.ENSP00000497806	NLGN2,DLGAP1,NLGN1,HOMER3,DLG4
2	GO Process	GO:0007268	Chemical synaptic transmission	7	409	1.32	3.9e-05	9606.ENSP00000221459,9606.ENSP00000225823,9606.ENSP00000305288,9606.ENSP00000316377,9606.ENSP00000392500,9606.ENSP00000477455,9606.ENSP00000497806	LIN7B,ASIC2,NLGN2,DLGAP1,NLGN1,GRIN2B,DLG4
2	GO Process	GO:2000463	Positive regulation of excitatory postsynaptic potential	4	31	2.2	3.9e-05	9606.ENSP00000305288,9606.ENSP00000392500,9606.ENSP00000477455,9606.ENSP00000497806	NLGN2,NLGN1,GRIN2B,DLG4
2	GO Process	GO:0035418	Protein localization to synapse	4	55	1.95	0.00018	9606.ENSP00000225823,9606.ENSP00000305288,9606.ENSP00000392500,9606.ENSP00000497806	ASIC2,NLGN2,NLGN1,DLG4
2	GO Process	GO:0044057	Regulation of system process	7	567	1.18	0.0002	9606.ENSP00000225823,9606.ENSP00000305288,9606.ENSP00000316377,9606.ENSP00000392500,9606.ENSP00000439937,9606.ENSP00000477455,9606.ENSP00000497806	ASIC2,NLGN2,DLGAP1,NLGN1,HOMER3,GRIN2B,DLG4
2	GO Process	GO:0072578	Neurotransmitter-gated ion channel clustering	3	13	2.45	0.00029	9606.ENSP00000305288,9606.ENSP00000392500,9606.ENSP00000497806	NLGN2,NLGN1,DLG4
2	GO Process	GO:0043269	Regulation of ion transport	7	700	1.09	0.00063	9606.ENSP00000225823,9606.ENSP00000305288,9606.ENSP00000358784,9606.ENSP00000392500,9606.ENSP00000439937,9606.ENSP00000477455,9606.ENSP00000497806	ASIC2,NLGN2,KCNA3,NLGN1,HOMER3,GRIN2B,DLG4
2	GO Process	GO:0097106	Postsynaptic density organization	3	19	2.29	0.00063	9606.ENSP00000305288,9606.ENSP00000392500,9606.ENSP00000497806	NLGN2,NLGN1,DLG4
2	GO Process	GO:0001941	Postsynaptic membrane organization	3	28	2.12	0.0015	9606.ENSP00000305288,9606.ENSP00000392500,9606.ENSP00000497806	NLGN2,NLGN1,DLG4
2	GO Process	GO:0034765	Regulation of ion transmembrane transport	6	504	1.17	0.0015	9606.ENSP00000225823,9606.ENSP00000305288,9606.ENSP00000358784,9606.ENSP00000392500,9606.ENSP00000477455,9606.ENSP00000497806	ASIC2,NLGN2,KCNA3,NLGN1,GRIN2B,DLG4
2	GO Process	GO:0065009	Regulation of molecular function	11	3085	0.64	0.002	9606.ENSP00000258302,9606.ENSP00000305288,9606.ENSP00000310561,9606.ENSP00000316377,9606.ENSP00000321537,9606.ENSP00000392500,9606.ENSP00000439937,9606.ENSP00000456548,9606.ENSP00000477455,9606.ENSP00000495726,9606.ENSP00000497806	RGS8,NLGN2,ARHGAP32,DLGAP1,LLGL1,NLGN1,HOMER3,ELFN1,GRIN2B,IQSEC2,DLG4
2	GO Process	GO:0050808	Synapse organization	5	298	1.32	0.0021	9606.ENSP00000225823,9606.ENSP00000305288,9606.ENSP00000392500,9606.ENSP00000456548,9606.ENSP00000497806	ASIC2,NLGN2,NLGN1,ELFN1,DLG4
2	GO Process	GO:0051968	Positive regulation of synaptic transmission, glutamatergic	3	33	2.05	0.0021	9606.ENSP00000305288,9606.ENSP00000392500,9606.ENSP00000477455	NLGN2,NLGN1,GRIN2B
2	GO Process	GO:0050806	Positive regulation of synaptic transmission	4	135	1.56	0.0025	9606.ENSP00000305288,9606.ENSP00000392500,9606.ENSP00000477455,9606.ENSP00000497806	NLGN2,NLGN1,GRIN2B,DLG4
2	GO Process	GO:0010646	Regulation of cell communication	11	3355	0.61	0.0039	9606.ENSP00000258302,9606.ENSP00000305288,9606.ENSP00000310561,9606.ENSP00000316377,9606.ENSP00000321537,9606.ENSP00000358715,9606.ENSP00000392500,9606.ENSP00000439937,9606.ENSP00000477455,9606.ENSP00000495726,9606.ENSP00000497806	RGS8,NLGN2,ARHGAP32,DLGAP1,LLGL1,SORCS3,NLGN1,HOMER3,GRIN2B,IQSEC2,DLG4
2	GO Process	GO:0023051	Regulation of signaling	11	3367	0.6	0.0039	9606.ENSP00000258302,9606.ENSP00000305288,9606.ENSP00000310561,9606.ENSP00000316377,9606.ENSP00000321537,9606.ENSP00000358715,9606.ENSP00000392500,9606.ENSP00000439937,9606.ENSP00000477455,9606.ENSP00000495726,9606.ENSP00000497806	RGS8,NLGN2,ARHGAP32,DLGAP1,LLGL1,SORCS3,NLGN1,HOMER3,GRIN2B,IQSEC2,DLG4
2	GO Process	GO:0034331	Cell junction maintenance	3	44	1.92	0.0039	9606.ENSP00000305288,9606.ENSP00000392500,9606.ENSP00000497806	NLGN2,NLGN1,DLG4
2	GO Process	GO:0032879	Regulation of localization	9	2103	0.72	0.0052	9606.ENSP00000225823,9606.ENSP00000305288,9606.ENSP00000321537,9606.ENSP00000358784,9606.ENSP00000392500,9606.ENSP00000439937,9606.ENSP00000477455,9606.ENSP00000495726,9606.ENSP00000497806	ASIC2,NLGN2,LLGL1,KCNA3,NLGN1,HOMER3,GRIN2B,IQSEC2,DLG4
2	GO Process	GO:0045197	Establishment or maintenance of epithelial cell apical/basal polarity	3	51	1.86	0.0052	9606.ENSP00000221459,9606.ENSP00000321537,9606.ENSP00000497806	LIN7B,LLGL1,DLG4
2	GO Process	GO:0072553	Terminal button organization	2	5	2.69	0.0061	9606.ENSP00000305288,9606.ENSP00000392500	NLGN2,NLGN1
2	GO Process	GO:0097113	AMPA glutamate receptor clustering	2	5	2.69	0.0061	9606.ENSP00000392500,9606.ENSP00000497806	NLGN1,DLG4
2	GO Process	GO:0042391	Regulation of membrane potential	5	428	1.16	0.007	9606.ENSP00000225823,9606.ENSP00000305288,9606.ENSP00000392500,9606.ENSP00000477455,9606.ENSP00000497806	ASIC2,NLGN2,NLGN1,GRIN2B,DLG4
2	GO Process	GO:0097119	Postsynaptic density protein 95 clustering	2	6	2.61	0.007	9606.ENSP00000305288,9606.ENSP00000392500	NLGN2,NLGN1
2	GO Process	GO:0051965	Positive regulation of synapse assembly	3	62	1.78	0.0071	9606.ENSP00000225823,9606.ENSP00000305288,9606.ENSP00000392500	ASIC2,NLGN2,NLGN1
2	GO Process	GO:0009966	Regulation of signal transduction	10	2978	0.62	0.0078	9606.ENSP00000258302,9606.ENSP00000305288,9606.ENSP00000310561,9606.ENSP00000316377,9606.ENSP00000321537,9606.ENSP00000392500,9606.ENSP00000439937,9606.ENSP00000477455,9606.ENSP00000495726,9606.ENSP00000497806	RGS8,NLGN2,ARHGAP32,DLGAP1,LLGL1,NLGN1,HOMER3,GRIN2B,IQSEC2,DLG4
2	GO Process	GO:0050807	Regulation of synapse organization	4	209	1.37	0.0079	9606.ENSP00000225823,9606.ENSP00000305288,9606.ENSP00000392500,9606.ENSP00000477455	ASIC2,NLGN2,NLGN1,GRIN2B
2	GO Process	GO:0051049	Regulation of transport	8	1763	0.75	0.0097	9606.ENSP00000225823,9606.ENSP00000305288,9606.ENSP00000321537,9606.ENSP00000358784,9606.ENSP00000392500,9606.ENSP00000439937,9606.ENSP00000477455,9606.ENSP00000497806	ASIC2,NLGN2,LLGL1,KCNA3,NLGN1,HOMER3,GRIN2B,DLG4
2	GO Process	GO:0097104	Postsynaptic membrane assembly	2	10	2.39	0.0133	9606.ENSP00000305288,9606.ENSP00000392500	NLGN2,NLGN1
2	GO Process	GO:0097105	Presynaptic membrane assembly	2	10	2.39	0.0133	9606.ENSP00000305288,9606.ENSP00000392500	NLGN2,NLGN1
2	GO Process	GO:0051668	Localization within membrane	5	535	1.06	0.0158	9606.ENSP00000221459,9606.ENSP00000305288,9606.ENSP00000321537,9606.ENSP00000392500,9606.ENSP00000497806	LIN7B,NLGN2,LLGL1,NLGN1,DLG4
2	GO Process	GO:0007158	Neuron cell-cell adhesion	2	16	2.19	0.0263	9606.ENSP00000305288,9606.ENSP00000392500	NLGN2,NLGN1
2	GO Process	GO:0007416	Synapse assembly	3	108	1.53	0.0263	9606.ENSP00000225823,9606.ENSP00000305288,9606.ENSP00000392500	ASIC2,NLGN2,NLGN1
2	GO Process	GO:0032230	Positive regulation of synaptic transmission, GABAergic	2	16	2.19	0.0263	9606.ENSP00000305288,9606.ENSP00000392500	NLGN2,NLGN1
2	GO Process	GO:0035641	Locomotory exploration behavior	2	16	2.19	0.0263	9606.ENSP00000305288,9606.ENSP00000497806	NLGN2,DLG4
2	GO Process	GO:1904861	Excitatory synapse assembly	2	16	2.19	0.0263	9606.ENSP00000305288,9606.ENSP00000392500	NLGN2,NLGN1
2	GO Process	GO:0098962	Regulation of postsynaptic neurotransmitter receptor activity	2	20	2.09	0.0363	9606.ENSP00000316377,9606.ENSP00000439937	DLGAP1,HOMER3
2	GO Process	GO:1902473	Regulation of protein localization to synapse	2	20	2.09	0.0363	9606.ENSP00000305288,9606.ENSP00000495726	NLGN2,IQSEC2
2	GO Process	GO:2000310	Regulation of NMDA receptor activity	2	23	2.03	0.0449	9606.ENSP00000392500,9606.ENSP00000497806	NLGN1,DLG4
2	GO Component	GO:0045202	Synapse	15	1350	1.14	1.15e-13	9606.ENSP00000221459,9606.ENSP00000225823,9606.ENSP00000248668,9606.ENSP00000258302,9606.ENSP00000305288,9606.ENSP00000310561,9606.ENSP00000316377,9606.ENSP00000358715,9606.ENSP00000358784,9606.ENSP00000392500,9606.ENSP00000439937,9606.ENSP00000456548,9606.ENSP00000477455,9606.ENSP00000495726,9606.ENSP00000497806	LIN7B,ASIC2,LRFN1,RGS8,NLGN2,ARHGAP32,DLGAP1,SORCS3,KCNA3,NLGN1,HOMER3,ELFN1,GRIN2B,IQSEC2,DLG4
2	GO Component	GO:0030054	Cell junction	16	2115	0.97	3.38e-13	9606.ENSP00000221459,9606.ENSP00000225823,9606.ENSP00000248668,9606.ENSP00000258302,9606.ENSP00000305288,9606.ENSP00000310561,9606.ENSP00000316377,9606.ENSP00000321537,9606.ENSP00000358715,9606.ENSP00000358784,9606.ENSP00000392500,9606.ENSP00000439937,9606.ENSP00000456548,9606.ENSP00000477455,9606.ENSP00000495726,9606.ENSP00000497806	LIN7B,ASIC2,LRFN1,RGS8,NLGN2,ARHGAP32,DLGAP1,LLGL1,SORCS3,KCNA3,NLGN1,HOMER3,ELFN1,GRIN2B,IQSEC2,DLG4
2	GO Component	GO:0098794	Postsynapse	12	621	1.38	1.2e-12	9606.ENSP00000221459,9606.ENSP00000225823,9606.ENSP00000248668,9606.ENSP00000305288,9606.ENSP00000310561,9606.ENSP00000316377,9606.ENSP00000358715,9606.ENSP00000358784,9606.ENSP00000392500,9606.ENSP00000439937,9606.ENSP00000477455,9606.ENSP00000497806	LIN7B,ASIC2,LRFN1,NLGN2,ARHGAP32,DLGAP1,SORCS3,KCNA3,NLGN1,HOMER3,GRIN2B,DLG4
2	GO Component	GO:0099572	Postsynaptic specialization	10	345	1.55	1.18e-11	9606.ENSP00000221459,9606.ENSP00000248668,9606.ENSP00000305288,9606.ENSP00000310561,9606.ENSP00000316377,9606.ENSP00000358715,9606.ENSP00000392500,9606.ENSP00000439937,9606.ENSP00000477455,9606.ENSP00000497806	LIN7B,LRFN1,NLGN2,ARHGAP32,DLGAP1,SORCS3,NLGN1,HOMER3,GRIN2B,DLG4
2	GO Component	GO:0098984	Neuron to neuron synapse	10	355	1.54	1.24e-11	9606.ENSP00000221459,9606.ENSP00000248668,9606.ENSP00000305288,9606.ENSP00000310561,9606.ENSP00000316377,9606.ENSP00000358715,9606.ENSP00000392500,9606.ENSP00000439937,9606.ENSP00000477455,9606.ENSP00000497806	LIN7B,LRFN1,NLGN2,ARHGAP32,DLGAP1,SORCS3,NLGN1,HOMER3,GRIN2B,DLG4
2	GO Component	GO:0014069	Postsynaptic density	9	324	1.53	3.53e-10	9606.ENSP00000221459,9606.ENSP00000248668,9606.ENSP00000310561,9606.ENSP00000316377,9606.ENSP00000358715,9606.ENSP00000392500,9606.ENSP00000439937,9606.ENSP00000477455,9606.ENSP00000497806	LIN7B,LRFN1,ARHGAP32,DLGAP1,SORCS3,NLGN1,HOMER3,GRIN2B,DLG4
2	GO Component	GO:0099634	Postsynaptic specialization membrane	7	117	1.87	9.16e-10	9606.ENSP00000221459,9606.ENSP00000248668,9606.ENSP00000305288,9606.ENSP00000358715,9606.ENSP00000392500,9606.ENSP00000477455,9606.ENSP00000497806	LIN7B,LRFN1,NLGN2,SORCS3,NLGN1,GRIN2B,DLG4
2	GO Component	GO:0045211	Postsynaptic membrane	8	268	1.57	3.54e-09	9606.ENSP00000221459,9606.ENSP00000248668,9606.ENSP00000305288,9606.ENSP00000358715,9606.ENSP00000358784,9606.ENSP00000392500,9606.ENSP00000477455,9606.ENSP00000497806	LIN7B,LRFN1,NLGN2,SORCS3,KCNA3,NLGN1,GRIN2B,DLG4
2	GO Component	GO:0098936	Intrinsic component of postsynaptic membrane	6	124	1.78	1.03e-07	9606.ENSP00000248668,9606.ENSP00000305288,9606.ENSP00000358715,9606.ENSP00000358784,9606.ENSP00000392500,9606.ENSP00000497806	LRFN1,NLGN2,SORCS3,KCNA3,NLGN1,DLG4
2	GO Component	GO:0043005	Neuron projection	11	1391	0.99	1.21e-07	9606.ENSP00000225823,9606.ENSP00000258302,9606.ENSP00000305288,9606.ENSP00000310561,9606.ENSP00000321537,9606.ENSP00000358784,9606.ENSP00000392500,9606.ENSP00000439937,9606.ENSP00000456548,9606.ENSP00000477455,9606.ENSP00000497806	ASIC2,RGS8,NLGN2,ARHGAP32,LLGL1,KCNA3,NLGN1,HOMER3,ELFN1,GRIN2B,DLG4
2	GO Component	GO:0098948	Intrinsic component of postsynaptic specialization membrane	5	81	1.88	8.63e-07	9606.ENSP00000248668,9606.ENSP00000305288,9606.ENSP00000358715,9606.ENSP00000392500,9606.ENSP00000497806	LRFN1,NLGN2,SORCS3,NLGN1,DLG4
2	GO Component	GO:0030425	Dendrite	8	624	1.2	1.41e-06	9606.ENSP00000225823,9606.ENSP00000258302,9606.ENSP00000305288,9606.ENSP00000310561,9606.ENSP00000392500,9606.ENSP00000439937,9606.ENSP00000456548,9606.ENSP00000497806	ASIC2,RGS8,NLGN2,ARHGAP32,NLGN1,HOMER3,ELFN1,DLG4
2	GO Component	GO:0070161	Anchoring junction	10	1325	0.97	1.41e-06	9606.ENSP00000221459,9606.ENSP00000248668,9606.ENSP00000305288,9606.ENSP00000310561,9606.ENSP00000316377,9606.ENSP00000321537,9606.ENSP00000392500,9606.ENSP00000439937,9606.ENSP00000477455,9606.ENSP00000497806	LIN7B,LRFN1,NLGN2,ARHGAP32,DLGAP1,LLGL1,NLGN1,HOMER3,GRIN2B,DLG4
2	GO Component	GO:0098839	Postsynaptic density membrane	5	91	1.83	1.41e-06	9606.ENSP00000221459,9606.ENSP00000248668,9606.ENSP00000358715,9606.ENSP00000477455,9606.ENSP00000497806	LIN7B,LRFN1,SORCS3,GRIN2B,DLG4
2	GO Component	GO:0099055	Integral component of postsynaptic membrane	5	118	1.72	3.88e-06	9606.ENSP00000248668,9606.ENSP00000305288,9606.ENSP00000358715,9606.ENSP00000358784,9606.ENSP00000392500	LRFN1,NLGN2,SORCS3,KCNA3,NLGN1
2	GO Component	GO:0060076	Excitatory synapse	4	53	1.97	1.14e-05	9606.ENSP00000305288,9606.ENSP00000392500,9606.ENSP00000456548,9606.ENSP00000497806	NLGN2,NLGN1,ELFN1,DLG4
2	GO Component	GO:0098978	Glutamatergic synapse	6	334	1.34	1.49e-05	9606.ENSP00000316377,9606.ENSP00000358715,9606.ENSP00000358784,9606.ENSP00000392500,9606.ENSP00000439937,9606.ENSP00000497806	DLGAP1,SORCS3,KCNA3,NLGN1,HOMER3,DLG4
2	GO Component	GO:0071944	Cell periphery	15	6015	0.49	1.7e-05	9606.ENSP00000221459,9606.ENSP00000225823,9606.ENSP00000248668,9606.ENSP00000258302,9606.ENSP00000305288,9606.ENSP00000310561,9606.ENSP00000316377,9606.ENSP00000321537,9606.ENSP00000358715,9606.ENSP00000358784,9606.ENSP00000392500,9606.ENSP00000439937,9606.ENSP00000456548,9606.ENSP00000477455,9606.ENSP00000497806	LIN7B,ASIC2,LRFN1,RGS8,NLGN2,ARHGAP32,DLGAP1,LLGL1,SORCS3,KCNA3,NLGN1,HOMER3,ELFN1,GRIN2B,DLG4
2	GO Component	GO:0099060	Integral component of postsynaptic specialization membrane	4	77	1.81	3.51e-05	9606.ENSP00000248668,9606.ENSP00000305288,9606.ENSP00000358715,9606.ENSP00000392500	LRFN1,NLGN2,SORCS3,NLGN1
2	GO Component	GO:0043197	Dendritic spine	4	176	1.45	0.00079	9606.ENSP00000225823,9606.ENSP00000310561,9606.ENSP00000392500,9606.ENSP00000497806	ASIC2,ARHGAP32,NLGN1,DLG4
2	GO Component	GO:0099146	Intrinsic component of postsynaptic density membrane	3	56	1.82	0.00092	9606.ENSP00000248668,9606.ENSP00000358715,9606.ENSP00000497806	LRFN1,SORCS3,DLG4
2	GO Component	GO:0005886	Plasma membrane	13	5544	0.46	0.001	9606.ENSP00000221459,9606.ENSP00000225823,9606.ENSP00000248668,9606.ENSP00000258302,9606.ENSP00000305288,9606.ENSP00000316377,9606.ENSP00000321537,9606.ENSP00000358715,9606.ENSP00000358784,9606.ENSP00000392500,9606.ENSP00000439937,9606.ENSP00000477455,9606.ENSP00000497806	LIN7B,ASIC2,LRFN1,RGS8,NLGN2,DLGAP1,LLGL1,SORCS3,KCNA3,NLGN1,HOMER3,GRIN2B,DLG4
2	GO Component	GO:0005887	Integral component of plasma membrane	8	1706	0.76	0.0014	9606.ENSP00000225823,9606.ENSP00000248668,9606.ENSP00000305288,9606.ENSP00000358715,9606.ENSP00000358784,9606.ENSP00000392500,9606.ENSP00000477455,9606.ENSP00000497806	ASIC2,LRFN1,NLGN2,SORCS3,KCNA3,NLGN1,GRIN2B,DLG4
2	GO Component	GO:0098793	Presynapse	5	525	1.07	0.0028	9606.ENSP00000221459,9606.ENSP00000305288,9606.ENSP00000358784,9606.ENSP00000392500,9606.ENSP00000497806	LIN7B,NLGN2,KCNA3,NLGN1,DLG4
2	GO Component	GO:0089717	Spanning component of membrane	2	19	2.11	0.0073	9606.ENSP00000305288,9606.ENSP00000392500	NLGN2,NLGN1
2	GO Component	GO:0060077	Inhibitory synapse	2	21	2.07	0.0086	9606.ENSP00000305288,9606.ENSP00000392500	NLGN2,NLGN1
2	GO Component	GO:0016020	Membrane	15	9523	0.29	0.0087	9606.ENSP00000221459,9606.ENSP00000225823,9606.ENSP00000248668,9606.ENSP00000258302,9606.ENSP00000305288,9606.ENSP00000310561,9606.ENSP00000316377,9606.ENSP00000321537,9606.ENSP00000358715,9606.ENSP00000358784,9606.ENSP00000392500,9606.ENSP00000439937,9606.ENSP00000456548,9606.ENSP00000477455,9606.ENSP00000497806	LIN7B,ASIC2,LRFN1,RGS8,NLGN2,ARHGAP32,DLGAP1,LLGL1,SORCS3,KCNA3,NLGN1,HOMER3,ELFN1,GRIN2B,DLG4
2	GO Component	GO:0005912	Adherens junction	3	177	1.32	0.0202	9606.ENSP00000221459,9606.ENSP00000321537,9606.ENSP00000497806	LIN7B,LLGL1,DLG4
2	GO Component	GO:0008328	Ionotropic glutamate receptor complex	2	40	1.79	0.0267	9606.ENSP00000477455,9606.ENSP00000497806	GRIN2B,DLG4
2	GO Component	GO:0034703	Cation channel complex	3	225	1.22	0.0373	9606.ENSP00000358784,9606.ENSP00000477455,9606.ENSP00000497806	KCNA3,GRIN2B,DLG4
2	GO Component	GO:0099061	Integral component of postsynaptic density membrane	2	52	1.68	0.041	9606.ENSP00000248668,9606.ENSP00000358715	LRFN1,SORCS3
2	KEGG	hsa04724	Glutamatergic synapse	4	112	1.64	0.00066	9606.ENSP00000316377,9606.ENSP00000439937,9606.ENSP00000477455,9606.ENSP00000497806	DLGAP1,HOMER3,GRIN2B,DLG4
2	Reactome	HSA-6794362	Protein-protein interactions at synapses	8	87	2.05	6.12e-12	9606.ENSP00000221459,9606.ENSP00000248668,9606.ENSP00000305288,9606.ENSP00000316377,9606.ENSP00000392500,9606.ENSP00000439937,9606.ENSP00000477455,9606.ENSP00000497806	LIN7B,LRFN1,NLGN2,DLGAP1,NLGN1,HOMER3,GRIN2B,DLG4
2	Reactome	HSA-6794361	Neurexins and neuroligins	7	56	2.19	3.08e-11	9606.ENSP00000221459,9606.ENSP00000305288,9606.ENSP00000316377,9606.ENSP00000392500,9606.ENSP00000439937,9606.ENSP00000477455,9606.ENSP00000497806	LIN7B,NLGN2,DLGAP1,NLGN1,HOMER3,GRIN2B,DLG4
2	Reactome	HSA-112316	Neuronal System	9	409	1.43	6.07e-09	9606.ENSP00000221459,9606.ENSP00000248668,9606.ENSP00000305288,9606.ENSP00000316377,9606.ENSP00000358784,9606.ENSP00000392500,9606.ENSP00000439937,9606.ENSP00000477455,9606.ENSP00000497806	LIN7B,LRFN1,NLGN2,DLGAP1,KCNA3,NLGN1,HOMER3,GRIN2B,DLG4
2	Reactome	HSA-8849932	Synaptic adhesion-like molecules	3	21	2.25	0.0005	9606.ENSP00000248668,9606.ENSP00000477455,9606.ENSP00000497806	LRFN1,GRIN2B,DLG4
2	Reactome	HSA-9609736	Assembly and cell surface presentation of NMDA receptors	3	43	1.93	0.003	9606.ENSP00000221459,9606.ENSP00000477455,9606.ENSP00000497806	LIN7B,GRIN2B,DLG4
2	Reactome	HSA-438066	Unblocking of NMDA receptors, glutamate binding and activation	2	21	2.07	0.0461	9606.ENSP00000477455,9606.ENSP00000497806	GRIN2B,DLG4
2	Reactome	HSA-442982	Ras activation upon Ca2+ influx through NMDA receptor	2	20	2.09	0.0461	9606.ENSP00000477455,9606.ENSP00000497806	GRIN2B,DLG4
2	Reactome	HSA-9617324	Negative regulation of NMDA receptor-mediated neuronal transmission	2	21	2.07	0.0461	9606.ENSP00000477455,9606.ENSP00000497806	GRIN2B,DLG4
2	Reactome	HSA-9620244	Long-term potentiation	2	23	2.03	0.0461	9606.ENSP00000477455,9606.ENSP00000497806	GRIN2B,DLG4
2	WikiPathways	WP4875	Disruption of postsynaptic signaling by CNV	4	33	2.17	1.47e-05	9606.ENSP00000305288,9606.ENSP00000316377,9606.ENSP00000392500,9606.ENSP00000477455	NLGN2,DLGAP1,NLGN1,GRIN2B
2	UniProt Keywords	KW-0770	Synapse	9	461	1.38	1.53e-08	9606.ENSP00000221459,9606.ENSP00000248668,9606.ENSP00000305288,9606.ENSP00000310561,9606.ENSP00000316377,9606.ENSP00000392500,9606.ENSP00000439937,9606.ENSP00000477455,9606.ENSP00000497806	LIN7B,LRFN1,NLGN2,ARHGAP32,DLGAP1,NLGN1,HOMER3,GRIN2B,DLG4
2	UniProt Keywords	KW-0965	Cell junction	9	809	1.14	1.03e-06	9606.ENSP00000221459,9606.ENSP00000248668,9606.ENSP00000305288,9606.ENSP00000310561,9606.ENSP00000316377,9606.ENSP00000392500,9606.ENSP00000439937,9606.ENSP00000477455,9606.ENSP00000497806	LIN7B,LRFN1,NLGN2,ARHGAP32,DLGAP1,NLGN1,HOMER3,GRIN2B,DLG4
2	UniProt Keywords	KW-0628	Postsynaptic cell membrane	4	146	1.53	0.0012	9606.ENSP00000221459,9606.ENSP00000248668,9606.ENSP00000305288,9606.ENSP00000477455	LIN7B,LRFN1,NLGN2,GRIN2B
2	UniProt Keywords	KW-0472	Membrane	14	7068	0.39	0.0053	9606.ENSP00000221459,9606.ENSP00000225823,9606.ENSP00000248668,9606.ENSP00000258302,9606.ENSP00000305288,9606.ENSP00000310561,9606.ENSP00000316377,9606.ENSP00000321537,9606.ENSP00000358715,9606.ENSP00000358784,9606.ENSP00000392500,9606.ENSP00000456548,9606.ENSP00000477455,9606.ENSP00000497806	LIN7B,ASIC2,LRFN1,RGS8,NLGN2,ARHGAP32,DLGAP1,LLGL1,SORCS3,KCNA3,NLGN1,ELFN1,GRIN2B,DLG4
2	UniProt Keywords	KW-1003	Cell membrane	10	3277	0.57	0.0066	9606.ENSP00000221459,9606.ENSP00000225823,9606.ENSP00000248668,9606.ENSP00000258302,9606.ENSP00000305288,9606.ENSP00000316377,9606.ENSP00000358784,9606.ENSP00000392500,9606.ENSP00000477455,9606.ENSP00000497806	LIN7B,ASIC2,LRFN1,RGS8,NLGN2,DLGAP1,KCNA3,NLGN1,GRIN2B,DLG4
2	UniProt Keywords	KW-0966	Cell projection	6	1024	0.86	0.0114	9606.ENSP00000258302,9606.ENSP00000305288,9606.ENSP00000310561,9606.ENSP00000321537,9606.ENSP00000456548,9606.ENSP00000497806	RGS8,NLGN2,ARHGAP32,LLGL1,ELFN1,DLG4
3	GO Process	GO:0007186	G protein-coupled receptor signaling pathway	12	1174	1.22	3.35e-11	9606.ENSP00000235382,9606.ENSP00000248564,9606.ENSP00000275364,9606.ENSP00000314223,9606.ENSP00000315011,9606.ENSP00000358963,9606.ENSP00000361009,9606.ENSP00000367872,9606.ENSP00000378492,9606.ENSP00000380247,9606.ENSP00000386229,9606.ENSP00000416996	RGS2,GNG11,GNA12,GPR88,EDNRA,HTR1B,PREX1,GNB1,GRM2,HRH1,RGS14,ACKR2
3	GO Process	GO:0007188	Adenylate cyclase-modulating G protein-coupled receptor signaling pathway	5	232	1.55	0.00056	9606.ENSP00000275364,9606.ENSP00000315011,9606.ENSP00000358963,9606.ENSP00000367872,9606.ENSP00000378492	GNA12,EDNRA,HTR1B,GNB1,GRM2
3	GO Process	GO:0097746	Blood vessel diameter maintenance	4	140	1.67	0.0034	9606.ENSP00000235382,9606.ENSP00000315011,9606.ENSP00000358963,9606.ENSP00000380247	RGS2,EDNRA,HTR1B,HRH1
3	GO Process	GO:0008015	Blood circulation	5	403	1.31	0.004	9606.ENSP00000235382,9606.ENSP00000275364,9606.ENSP00000315011,9606.ENSP00000358963,9606.ENSP00000380247	RGS2,GNA12,EDNRA,HTR1B,HRH1
3	GO Process	GO:0051955	Regulation of amino acid transport	3	43	2.06	0.004	9606.ENSP00000235382,9606.ENSP00000358963,9606.ENSP00000378492	RGS2,HTR1B,GRM2
3	GO Process	GO:0045744	Negative regulation of G protein-coupled receptor signaling pathway	3	49	2	0.0049	9606.ENSP00000235382,9606.ENSP00000358963,9606.ENSP00000386229	RGS2,HTR1B,RGS14
3	GO Process	GO:0003008	System process	8	2029	0.81	0.0052	9606.ENSP00000235382,9606.ENSP00000275364,9606.ENSP00000314223,9606.ENSP00000315011,9606.ENSP00000358963,9606.ENSP00000367872,9606.ENSP00000380247,9606.ENSP00000386229	RGS2,GNA12,GPR88,EDNRA,HTR1B,GNB1,HRH1,RGS14
3	GO Process	GO:0035556	Intracellular signal transduction	7	1518	0.88	0.0096	9606.ENSP00000275364,9606.ENSP00000315011,9606.ENSP00000361009,9606.ENSP00000367872,9606.ENSP00000380247,9606.ENSP00000386229,9606.ENSP00000416996	GNA12,EDNRA,PREX1,GNB1,HRH1,RGS14,ACKR2
3	GO Process	GO:0010243	Response to organonitrogen compound	6	963	1.01	0.0098	9606.ENSP00000235382,9606.ENSP00000315011,9606.ENSP00000358963,9606.ENSP00000367872,9606.ENSP00000378492,9606.ENSP00000380247	RGS2,EDNRA,HTR1B,GNB1,GRM2,HRH1
3	GO Process	GO:0007193	Adenylate cyclase-inhibiting G protein-coupled receptor signaling pathway	3	74	1.82	0.0113	9606.ENSP00000315011,9606.ENSP00000358963,9606.ENSP00000378492	EDNRA,HTR1B,GRM2
3	GO Process	GO:0007610	Behavior	5	598	1.14	0.0118	9606.ENSP00000314223,9606.ENSP00000358963,9606.ENSP00000378492,9606.ENSP00000380247,9606.ENSP00000386229	GPR88,HTR1B,GRM2,HRH1,RGS14
3	GO Process	GO:0031279	Regulation of cyclase activity	3	78	1.8	0.0118	9606.ENSP00000235382,9606.ENSP00000315011,9606.ENSP00000378492	RGS2,EDNRA,GRM2
3	GO Process	GO:1903351	Cellular response to dopamine	3	81	1.78	0.0118	9606.ENSP00000358963,9606.ENSP00000367872,9606.ENSP00000380247	HTR1B,GNB1,HRH1
3	GO Process	GO:0044070	Regulation of anion transport	3	93	1.72	0.0144	9606.ENSP00000235382,9606.ENSP00000358963,9606.ENSP00000378492	RGS2,HTR1B,GRM2
3	GO Process	GO:0065008	Regulation of biological quality	9	3654	0.61	0.0164	9606.ENSP00000235382,9606.ENSP00000275364,9606.ENSP00000314223,9606.ENSP00000315011,9606.ENSP00000358963,9606.ENSP00000378492,9606.ENSP00000380247,9606.ENSP00000386229,9606.ENSP00000416996	RGS2,GNA12,GPR88,EDNRA,HTR1B,GRM2,HRH1,RGS14,ACKR2
3	GO Process	GO:0051956	Negative regulation of amino acid transport	2	15	2.34	0.0218	9606.ENSP00000235382,9606.ENSP00000358963	RGS2,HTR1B
3	GO Process	GO:0042221	Response to chemical	9	4010	0.57	0.0335	9606.ENSP00000235382,9606.ENSP00000275364,9606.ENSP00000315011,9606.ENSP00000358963,9606.ENSP00000361009,9606.ENSP00000367872,9606.ENSP00000378492,9606.ENSP00000380247,9606.ENSP00000416996	RGS2,GNA12,EDNRA,HTR1B,PREX1,GNB1,GRM2,HRH1,ACKR2
3	GO Process	GO:0007612	Learning	3	149	1.52	0.0409	9606.ENSP00000314223,9606.ENSP00000380247,9606.ENSP00000386229	GPR88,HRH1,RGS14
3	GO Process	GO:0050804	Modulation of chemical synaptic transmission	4	436	1.18	0.0434	9606.ENSP00000358963,9606.ENSP00000378492,9606.ENSP00000380247,9606.ENSP00000386229	HTR1B,GRM2,HRH1,RGS14
3	GO Process	GO:0010259	Multicellular organism aging	2	25	2.12	0.0464	9606.ENSP00000275364,9606.ENSP00000315011	GNA12,EDNRA
3	GO Process	GO:1903792	Negative regulation of anion transport	2	25	2.12	0.0464	9606.ENSP00000235382,9606.ENSP00000358963	RGS2,HTR1B
3	GO Process	GO:0099536	Synaptic signaling	4	456	1.16	0.0466	9606.ENSP00000358963,9606.ENSP00000367872,9606.ENSP00000378492,9606.ENSP00000380247	HTR1B,GNB1,GRM2,HRH1
3	GO Function	GO:0003924	GTPase activity	5	317	1.41	0.004	9606.ENSP00000235382,9606.ENSP00000248564,9606.ENSP00000275364,9606.ENSP00000367872,9606.ENSP00000386229	RGS2,GNG11,GNA12,GNB1,RGS14
3	GO Function	GO:0004930	G protein-coupled receptor activity	6	831	1.07	0.0105	9606.ENSP00000314223,9606.ENSP00000315011,9606.ENSP00000358963,9606.ENSP00000378492,9606.ENSP00000380247,9606.ENSP00000416996	GPR88,EDNRA,HTR1B,GRM2,HRH1,ACKR2
3	KEGG	hsa04022	cGMP-PKG signaling pathway	3	163	1.48	0.012	9606.ENSP00000235382,9606.ENSP00000275364,9606.ENSP00000315011	RGS2,GNA12,EDNRA
3	KEGG	hsa04062	Chemokine signaling pathway	3	186	1.42	0.012	9606.ENSP00000248564,9606.ENSP00000361009,9606.ENSP00000367872	GNG11,PREX1,GNB1
3	KEGG	hsa04080	Neuroactive ligand-receptor interaction	4	329	1.3	0.012	9606.ENSP00000315011,9606.ENSP00000358963,9606.ENSP00000378492,9606.ENSP00000380247	EDNRA,HTR1B,GRM2,HRH1
3	KEGG	hsa04724	Glutamatergic synapse	3	112	1.64	0.012	9606.ENSP00000248564,9606.ENSP00000367872,9606.ENSP00000378492	GNG11,GNB1,GRM2
3	KEGG	hsa04726	Serotonergic synapse	3	108	1.66	0.012	9606.ENSP00000248564,9606.ENSP00000358963,9606.ENSP00000367872	GNG11,HTR1B,GNB1
3	KEGG	hsa05163	Human cytomegalovirus infection	3	217	1.36	0.012	9606.ENSP00000248564,9606.ENSP00000275364,9606.ENSP00000367872	GNG11,GNA12,GNB1
3	KEGG	hsa05167	Kaposi sarcoma-associated herpesvirus infection	3	187	1.42	0.012	9606.ENSP00000248564,9606.ENSP00000361009,9606.ENSP00000367872	GNG11,PREX1,GNB1
3	KEGG	hsa05200	Pathways in cancer	4	515	1.11	0.012	9606.ENSP00000248564,9606.ENSP00000275364,9606.ENSP00000315011,9606.ENSP00000367872	GNG11,GNA12,EDNRA,GNB1
3	KEGG	hsa04713	Circadian entrainment	2	91	1.56	0.0461	9606.ENSP00000248564,9606.ENSP00000367872	GNG11,GNB1
3	KEGG	hsa04727	GABAergic synapse	2	85	1.59	0.0461	9606.ENSP00000248564,9606.ENSP00000367872	GNG11,GNB1
3	KEGG	hsa05032	Morphine addiction	2	88	1.57	0.0461	9606.ENSP00000248564,9606.ENSP00000367872	GNG11,GNB1
3	Reactome	HSA-372790	Signaling by GPCR	11	697	1.41	3.16e-12	9606.ENSP00000235382,9606.ENSP00000248564,9606.ENSP00000275364,9606.ENSP00000315011,9606.ENSP00000358963,9606.ENSP00000361009,9606.ENSP00000367872,9606.ENSP00000378492,9606.ENSP00000380247,9606.ENSP00000386229,9606.ENSP00000416996	RGS2,GNG11,GNA12,EDNRA,HTR1B,PREX1,GNB1,GRM2,HRH1,RGS14,ACKR2
3	Reactome	HSA-388396	GPCR downstream signalling	10	624	1.42	7.86e-11	9606.ENSP00000235382,9606.ENSP00000248564,9606.ENSP00000275364,9606.ENSP00000315011,9606.ENSP00000358963,9606.ENSP00000361009,9606.ENSP00000367872,9606.ENSP00000378492,9606.ENSP00000380247,9606.ENSP00000386229	RGS2,GNG11,GNA12,EDNRA,HTR1B,PREX1,GNB1,GRM2,HRH1,RGS14
3	Reactome	HSA-500792	GPCR ligand binding	7	459	1.4	1.61e-06	9606.ENSP00000248564,9606.ENSP00000315011,9606.ENSP00000358963,9606.ENSP00000367872,9606.ENSP00000378492,9606.ENSP00000380247,9606.ENSP00000416996	GNG11,EDNRA,HTR1B,GNB1,GRM2,HRH1,ACKR2
3	Reactome	HSA-416476	G alpha (q) signalling events	5	217	1.58	5.87e-05	9606.ENSP00000235382,9606.ENSP00000248564,9606.ENSP00000315011,9606.ENSP00000367872,9606.ENSP00000380247	RGS2,GNG11,EDNRA,GNB1,HRH1
3	Reactome	HSA-416482	G alpha (12/13) signalling events	4	80	1.91	5.87e-05	9606.ENSP00000248564,9606.ENSP00000275364,9606.ENSP00000361009,9606.ENSP00000367872	GNG11,GNA12,PREX1,GNB1
3	Reactome	HSA-418594	G alpha (i) signalling events	5	309	1.42	0.00023	9606.ENSP00000248564,9606.ENSP00000358963,9606.ENSP00000367872,9606.ENSP00000378492,9606.ENSP00000386229	GNG11,HTR1B,GNB1,GRM2,RGS14
3	Reactome	HSA-456926	Thrombin signalling through proteinase activated receptors (PARs)	3	32	2.19	0.00032	9606.ENSP00000248564,9606.ENSP00000275364,9606.ENSP00000367872	GNG11,GNA12,GNB1
3	Reactome	HSA-373076	Class A/1 (Rhodopsin-like receptors)	4	326	1.3	0.0087	9606.ENSP00000315011,9606.ENSP00000358963,9606.ENSP00000380247,9606.ENSP00000416996	EDNRA,HTR1B,HRH1,ACKR2
3	Reactome	HSA-8964315	G beta:gamma signalling through BTK	2	18	2.26	0.0146	9606.ENSP00000248564,9606.ENSP00000367872	GNG11,GNB1
3	Reactome	HSA-392851	Prostacyclin signalling through prostacyclin receptor	2	19	2.24	0.0147	9606.ENSP00000248564,9606.ENSP00000367872	GNG11,GNB1
3	Reactome	HSA-392170	ADP signalling through P2Y purinoceptor 12	2	22	2.17	0.0148	9606.ENSP00000248564,9606.ENSP00000367872	GNG11,GNB1
3	Reactome	HSA-418217	G beta:gamma signalling through PLC beta	2	20	2.22	0.0148	9606.ENSP00000248564,9606.ENSP00000367872	GNG11,GNB1
3	Reactome	HSA-500657	Presynaptic function of Kainate receptors	2	21	2.19	0.0148	9606.ENSP00000248564,9606.ENSP00000367872	GNG11,GNB1
3	Reactome	HSA-8964616	G beta:gamma signalling through CDC42	2	20	2.22	0.0148	9606.ENSP00000248564,9606.ENSP00000367872	GNG11,GNB1
3	Reactome	HSA-202040	G-protein activation	2	24	2.14	0.0156	9606.ENSP00000248564,9606.ENSP00000367872	GNG11,GNB1
3	Reactome	HSA-392451	G beta:gamma signalling through PI3Kgamma	2	25	2.12	0.0156	9606.ENSP00000248564,9606.ENSP00000367872	GNG11,GNB1
3	Reactome	HSA-418592	ADP signalling through P2Y purinoceptor 1	2	25	2.12	0.0156	9606.ENSP00000248564,9606.ENSP00000367872	GNG11,GNB1
3	Reactome	HSA-428930	Thromboxane signalling through TP receptor	2	24	2.14	0.0156	9606.ENSP00000248564,9606.ENSP00000367872	GNG11,GNB1
3	Reactome	HSA-400042	Adrenaline,noradrenaline inhibits insulin secretion	2	28	2.07	0.0167	9606.ENSP00000248564,9606.ENSP00000367872	GNG11,GNB1
3	Reactome	HSA-1296041	Activation of G protein gated Potassium channels	2	29	2.05	0.017	9606.ENSP00000248564,9606.ENSP00000367872	GNG11,GNB1
3	Reactome	HSA-997272	Inhibition of voltage gated Ca2+ channels via Gbeta/gamma subunits	2	29	2.05	0.017	9606.ENSP00000248564,9606.ENSP00000367872	GNG11,GNB1
3	Reactome	HSA-163359	Glucagon signaling in metabolic regulation	2	33	2	0.0176	9606.ENSP00000248564,9606.ENSP00000367872	GNG11,GNB1
3	Reactome	HSA-420092	Glucagon-type ligand receptors	2	33	2	0.0176	9606.ENSP00000248564,9606.ENSP00000367872	GNG11,GNB1
3	Reactome	HSA-6814122	Cooperation of PDCL (PhLP1) and TRiC/CCT in G-protein beta folding	2	38	1.94	0.0199	9606.ENSP00000248564,9606.ENSP00000367872	GNG11,GNB1
3	Reactome	HSA-375280	Amine ligand-binding receptors	2	42	1.89	0.0233	9606.ENSP00000358963,9606.ENSP00000380247	HTR1B,HRH1
3	Reactome	HSA-381676	Glucagon-like Peptide-1 (GLP1) regulates insulin secretion	2	42	1.89	0.0233	9606.ENSP00000248564,9606.ENSP00000367872	GNG11,GNB1
3	Reactome	HSA-432040	Vasopressin regulates renal water homeostasis via Aquaporins	2	42	1.89	0.0233	9606.ENSP00000248564,9606.ENSP00000367872	GNG11,GNB1
3	Reactome	HSA-9634597	GPER1 signaling	2	45	1.86	0.0233	9606.ENSP00000248564,9606.ENSP00000367872	GNG11,GNB1
3	Reactome	HSA-9660821	ADORA2B mediated anti-inflammatory cytokines production	2	43	1.88	0.0233	9606.ENSP00000248564,9606.ENSP00000367872	GNG11,GNB1
3	Reactome	HSA-418597	G alpha (z) signalling events	2	48	1.84	0.0246	9606.ENSP00000248564,9606.ENSP00000367872	GNG11,GNB1
3	Reactome	HSA-4086398	Ca2+ pathway	2	60	1.74	0.0351	9606.ENSP00000248564,9606.ENSP00000367872	GNG11,GNB1
3	WikiPathways	WP289	Myometrial relaxation and contraction pathways	4	156	1.62	0.0014	9606.ENSP00000235382,9606.ENSP00000248564,9606.ENSP00000367872,9606.ENSP00000386229	RGS2,GNG11,GNB1,RGS14
3	WikiPathways	WP536	Calcium regulation in cardiac cells	4	151	1.64	0.0014	9606.ENSP00000235382,9606.ENSP00000248564,9606.ENSP00000367872,9606.ENSP00000386229	RGS2,GNG11,GNB1,RGS14
3	WikiPathways	WP455	GPCRs, class A rhodopsin-like	4	256	1.41	0.0035	9606.ENSP00000315011,9606.ENSP00000358963,9606.ENSP00000380247,9606.ENSP00000416996	EDNRA,HTR1B,HRH1,ACKR2
3	WikiPathways	WP35	G protein signaling pathways	3	91	1.73	0.0044	9606.ENSP00000248564,9606.ENSP00000275364,9606.ENSP00000367872	GNG11,GNA12,GNB1
3	WikiPathways	WP3929	Chemokine signaling pathway	3	165	1.47	0.0198	9606.ENSP00000248564,9606.ENSP00000361009,9606.ENSP00000367872	GNG11,PREX1,GNB1
3	WikiPathways	WP58	Monoamine GPCRs	2	33	2	0.026	9606.ENSP00000358963,9606.ENSP00000380247	HTR1B,HRH1
3	UniProt Keywords	KW-0807	Transducer	9	837	1.25	6.24e-08	9606.ENSP00000248564,9606.ENSP00000275364,9606.ENSP00000314223,9606.ENSP00000315011,9606.ENSP00000358963,9606.ENSP00000367872,9606.ENSP00000378492,9606.ENSP00000380247,9606.ENSP00000416996	GNG11,GNA12,GPR88,EDNRA,HTR1B,GNB1,GRM2,HRH1,ACKR2
3	UniProt Keywords	KW-1003	Cell membrane	11	3277	0.74	9.38e-06	9606.ENSP00000235382,9606.ENSP00000248564,9606.ENSP00000275364,9606.ENSP00000314223,9606.ENSP00000315011,9606.ENSP00000358963,9606.ENSP00000361009,9606.ENSP00000378492,9606.ENSP00000380247,9606.ENSP00000386229,9606.ENSP00000416996	RGS2,GNG11,GNA12,GPR88,EDNRA,HTR1B,PREX1,GRM2,HRH1,RGS14,ACKR2
3	UniProt Keywords	KW-0297	G-protein coupled receptor	6	781	1.1	0.00067	9606.ENSP00000314223,9606.ENSP00000315011,9606.ENSP00000358963,9606.ENSP00000378492,9606.ENSP00000380247,9606.ENSP00000416996	GPR88,EDNRA,HTR1B,GRM2,HRH1,ACKR2
3	UniProt Keywords	KW-0734	Signal transduction inhibitor	2	47	1.84	0.044	9606.ENSP00000235382,9606.ENSP00000386229	RGS2,RGS14
4	GO Function	GO:0005251	Delayed rectifier potassium channel activity	3	30	2.25	0.0034	9606.ENSP00000304127,9606.ENSP00000315654,9606.ENSP00000360626	KCNG3,KCNG2,KCNG1
4	GO Component	GO:0008076	Voltage-gated potassium channel complex	3	83	1.81	0.0264	9606.ENSP00000304127,9606.ENSP00000315654,9606.ENSP00000360626	KCNG3,KCNG2,KCNG1
4	Reactome	HSA-1296072	Voltage gated Potassium channels	3	43	2.1	0.0044	9606.ENSP00000304127,9606.ENSP00000315654,9606.ENSP00000360626	KCNG3,KCNG2,KCNG1
4	UniProt Keywords	KW-0631	Potassium channel	3	76	1.85	0.0067	9606.ENSP00000304127,9606.ENSP00000315654,9606.ENSP00000360626	KCNG3,KCNG2,KCNG1
4	UniProt Keywords	KW-0407	Ion channel	4	348	1.31	0.01	9606.ENSP00000304127,9606.ENSP00000315654,9606.ENSP00000360626,9606.ENSP00000480514	KCNG3,KCNG2,KCNG1,TMCO1
4	UniProt Keywords	KW-0851	Voltage-gated channel	3	148	1.56	0.01	9606.ENSP00000304127,9606.ENSP00000315654,9606.ENSP00000360626	KCNG3,KCNG2,KCNG1
5	STRING clusters	CL:29042	Mixed, incl. GAIN domain superfamily, and Leucine-rich repeat, typical subtype	4	76	2.06	0.00014	9606.ENSP00000314901,9606.ENSP00000379241,9606.ENSP00000379880,9606.ENSP00000422533	LRRN1,LRRC2,LRRC3B,ADGRL3
5	UniProt Keywords	KW-0433	Leucine-rich repeat	7	305	1.7	5.49e-09	9606.ENSP00000314901,9606.ENSP00000326759,9606.ENSP00000379212,9606.ENSP00000379241,9606.ENSP00000379880,9606.ENSP00000405841,9606.ENSP00000498533	LRRN1,LRIG3,PODN,LRRC2,LRRC3B,RXFP1,LRRC55
5	InterPro	IPR003591	Leucine-rich repeat, typical subtype	7	179	1.93	1.52e-09	9606.ENSP00000314901,9606.ENSP00000326759,9606.ENSP00000379212,9606.ENSP00000379241,9606.ENSP00000379880,9606.ENSP00000405841,9606.ENSP00000498533	LRRN1,LRIG3,PODN,LRRC2,LRRC3B,RXFP1,LRRC55
5	InterPro	IPR001611	Leucine-rich repeat	7	259	1.77	9.53e-09	9606.ENSP00000314901,9606.ENSP00000326759,9606.ENSP00000379212,9606.ENSP00000379241,9606.ENSP00000379880,9606.ENSP00000405841,9606.ENSP00000498533	LRRN1,LRIG3,PODN,LRRC2,LRRC3B,RXFP1,LRRC55
5	InterPro	IPR032675	Leucine-rich repeat domain superfamily	7	323	1.68	2.9e-08	9606.ENSP00000314901,9606.ENSP00000326759,9606.ENSP00000379212,9606.ENSP00000379241,9606.ENSP00000379880,9606.ENSP00000405841,9606.ENSP00000498533	LRRN1,LRIG3,PODN,LRRC2,LRRC3B,RXFP1,LRRC55
5	InterPro	IPR000372	Leucine-rich repeat N-terminal domain	3	55	2.08	0.0036	9606.ENSP00000379212,9606.ENSP00000379880,9606.ENSP00000498533	PODN,LRRC3B,LRRC55
5	InterPro	IPR000483	Cysteine-rich flanking region, C-terminal	3	83	1.9	0.0095	9606.ENSP00000314901,9606.ENSP00000326759,9606.ENSP00000498533	LRRN1,LRIG3,LRRC55
5	SMART	SM00370	Leucine-rich repeats, outliers	6	219	1.78	1.39e-07	9606.ENSP00000314901,9606.ENSP00000326759,9606.ENSP00000379212,9606.ENSP00000379241,9606.ENSP00000405841,9606.ENSP00000498533	LRRN1,LRIG3,PODN,LRRC2,RXFP1,LRRC55
5	SMART	SM00013	Leucine rich repeat N-terminal domain	5	94	2.07	1.47e-07	9606.ENSP00000314901,9606.ENSP00000326759,9606.ENSP00000379212,9606.ENSP00000405841,9606.ENSP00000498533	LRRN1,LRIG3,PODN,RXFP1,LRRC55
5	SMART	SM00369	Leucine-rich repeats, typical (most populated) subfamily	5	127	1.94	4.22e-07	9606.ENSP00000314901,9606.ENSP00000326759,9606.ENSP00000379212,9606.ENSP00000379241,9606.ENSP00000405841	LRRN1,LRIG3,PODN,LRRC2,RXFP1
5	SMART	SM00082	Leucine rich repeat C-terminal domain	3	88	1.87	0.0016	9606.ENSP00000314901,9606.ENSP00000326759,9606.ENSP00000498533	LRRN1,LRIG3,LRRC55
6	GO Process	GO:0009267	Cellular response to starvation	4	169	1.71	0.0032	9606.ENSP00000262139,9606.ENSP00000354558,9606.ENSP00000355231,9606.ENSP00000358423	WIPI1,MTOR,BECN1,RRAGD
6	GO Process	GO:0010506	Regulation of autophagy	5	346	1.5	0.0032	9606.ENSP00000262139,9606.ENSP00000312741,9606.ENSP00000354558,9606.ENSP00000355231,9606.ENSP00000358423	WIPI1,CAMKK2,MTOR,BECN1,RRAGD
6	GO Process	GO:0031329	Regulation of cellular catabolic process	6	789	1.22	0.0032	9606.ENSP00000262139,9606.ENSP00000312741,9606.ENSP00000354558,9606.ENSP00000355231,9606.ENSP00000358423,9606.ENSP00000368144	WIPI1,CAMKK2,MTOR,BECN1,RRAGD,PRR5L
6	GO Process	GO:0031331	Positive regulation of cellular catabolic process	5	413	1.42	0.0032	9606.ENSP00000262139,9606.ENSP00000312741,9606.ENSP00000354558,9606.ENSP00000355231,9606.ENSP00000368144	WIPI1,CAMKK2,MTOR,BECN1,PRR5L
6	GO Process	GO:0031667	Response to nutrient levels	5	461	1.38	0.0032	9606.ENSP00000262139,9606.ENSP00000354558,9606.ENSP00000355231,9606.ENSP00000358423,9606.ENSP00000363377	WIPI1,MTOR,BECN1,RRAGD,FOXO4
6	GO Process	GO:0033554	Cellular response to stress	7	1572	0.99	0.0032	9606.ENSP00000262139,9606.ENSP00000312741,9606.ENSP00000354558,9606.ENSP00000355231,9606.ENSP00000358423,9606.ENSP00000363377,9606.ENSP00000368144	WIPI1,CAMKK2,MTOR,BECN1,RRAGD,FOXO4,PRR5L
6	GO Process	GO:0034198	Cellular response to amino acid starvation	3	49	2.13	0.0032	9606.ENSP00000354558,9606.ENSP00000355231,9606.ENSP00000358423	MTOR,BECN1,RRAGD
6	GO Process	GO:0062197	Cellular response to chemical stress	4	272	1.51	0.0047	9606.ENSP00000312741,9606.ENSP00000354558,9606.ENSP00000355231,9606.ENSP00000368144	CAMKK2,MTOR,BECN1,PRR5L
6	GO Process	GO:0006950	Response to stress	8	3358	0.72	0.0054	9606.ENSP00000262139,9606.ENSP00000312741,9606.ENSP00000340608,9606.ENSP00000354558,9606.ENSP00000355231,9606.ENSP00000358423,9606.ENSP00000363377,9606.ENSP00000368144	WIPI1,CAMKK2,SGK2,MTOR,BECN1,RRAGD,FOXO4,PRR5L
6	GO Process	GO:0007154	Cell communication	9	5165	0.58	0.0054	9606.ENSP00000262139,9606.ENSP00000262719,9606.ENSP00000312741,9606.ENSP00000340608,9606.ENSP00000354558,9606.ENSP00000355231,9606.ENSP00000358423,9606.ENSP00000363377,9606.ENSP00000368144	WIPI1,PHLPP1,CAMKK2,SGK2,MTOR,BECN1,RRAGD,FOXO4,PRR5L
6	GO Process	GO:0006468	Protein phosphorylation	5	736	1.17	0.0071	9606.ENSP00000312741,9606.ENSP00000340608,9606.ENSP00000354558,9606.ENSP00000355231,9606.ENSP00000368144	CAMKK2,SGK2,MTOR,BECN1,PRR5L
6	GO Process	GO:0006979	Response to oxidative stress	4	368	1.38	0.0113	9606.ENSP00000312741,9606.ENSP00000340608,9606.ENSP00000355231,9606.ENSP00000368144	CAMKK2,SGK2,BECN1,PRR5L
6	GO Process	GO:0071233	Cellular response to leucine	2	11	2.6	0.0113	9606.ENSP00000354558,9606.ENSP00000358423	MTOR,RRAGD
6	GO Process	GO:1990253	Cellular response to leucine starvation	2	13	2.53	0.0138	9606.ENSP00000354558,9606.ENSP00000358423	MTOR,RRAGD
6	GO Process	GO:0010508	Positive regulation of autophagy	3	146	1.65	0.0216	9606.ENSP00000262139,9606.ENSP00000312741,9606.ENSP00000355231	WIPI1,CAMKK2,BECN1
6	GO Process	GO:0051716	Cellular response to stimulus	9	6357	0.49	0.023	9606.ENSP00000262139,9606.ENSP00000262719,9606.ENSP00000312741,9606.ENSP00000340608,9606.ENSP00000354558,9606.ENSP00000355231,9606.ENSP00000358423,9606.ENSP00000363377,9606.ENSP00000368144	WIPI1,PHLPP1,CAMKK2,SGK2,MTOR,BECN1,RRAGD,FOXO4,PRR5L
6	GO Process	GO:2000786	Positive regulation of autophagosome assembly	2	19	2.36	0.023	9606.ENSP00000262139,9606.ENSP00000355231	WIPI1,BECN1
6	GO Process	GO:0016241	Regulation of macroautophagy	3	159	1.62	0.0247	9606.ENSP00000262139,9606.ENSP00000354558,9606.ENSP00000355231	WIPI1,MTOR,BECN1
6	GO Process	GO:1901701	Cellular response to oxygen-containing compound	5	1057	1.02	0.0252	9606.ENSP00000312741,9606.ENSP00000354558,9606.ENSP00000355231,9606.ENSP00000358423,9606.ENSP00000363377	CAMKK2,MTOR,BECN1,RRAGD,FOXO4
6	GO Process	GO:0010638	Positive regulation of organelle organization	4	508	1.24	0.0259	9606.ENSP00000262139,9606.ENSP00000312741,9606.ENSP00000354558,9606.ENSP00000355231	WIPI1,CAMKK2,MTOR,BECN1
6	GO Process	GO:0007033	Vacuole organization	3	177	1.57	0.0296	9606.ENSP00000262139,9606.ENSP00000354558,9606.ENSP00000355231	WIPI1,MTOR,BECN1
6	GO Process	GO:0016236	Macroautophagy	3	188	1.54	0.0343	9606.ENSP00000262139,9606.ENSP00000354558,9606.ENSP00000355231	WIPI1,MTOR,BECN1
6	GO Component	GO:0031932	TORC2 complex	2	11	2.6	0.0295	9606.ENSP00000354558,9606.ENSP00000368144	MTOR,PRR5L
6	KEGG	hsa04140	Autophagy - animal	5	131	1.92	6.02e-07	9606.ENSP00000262139,9606.ENSP00000312741,9606.ENSP00000354558,9606.ENSP00000355231,9606.ENSP00000358423	WIPI1,CAMKK2,MTOR,BECN1,RRAGD
6	KEGG	hsa05131	Shigellosis	5	218	1.7	3.62e-06	9606.ENSP00000262139,9606.ENSP00000354558,9606.ENSP00000355231,9606.ENSP00000358423,9606.ENSP00000363377	WIPI1,MTOR,BECN1,RRAGD,FOXO4
6	KEGG	hsa04136	Autophagy - other	3	31	2.33	4.38e-05	9606.ENSP00000262139,9606.ENSP00000354558,9606.ENSP00000355231	WIPI1,MTOR,BECN1
6	KEGG	hsa05017	Spinocerebellar ataxia	3	135	1.69	0.0023	9606.ENSP00000262139,9606.ENSP00000354558,9606.ENSP00000355231	WIPI1,MTOR,BECN1
6	KEGG	hsa05016	Huntington disease	3	295	1.35	0.0181	9606.ENSP00000262139,9606.ENSP00000354558,9606.ENSP00000355231	WIPI1,MTOR,BECN1
6	KEGG	hsa04151	PI3K-Akt signaling pathway	3	349	1.27	0.0245	9606.ENSP00000262719,9606.ENSP00000340608,9606.ENSP00000354558	PHLPP1,SGK2,MTOR
6	KEGG	hsa04211	Longevity regulating pathway	2	87	1.7	0.0245	9606.ENSP00000312741,9606.ENSP00000354558	CAMKK2,MTOR
6	KEGG	hsa04920	Adipocytokine signaling pathway	2	68	1.81	0.0245	9606.ENSP00000312741,9606.ENSP00000354558	CAMKK2,MTOR
6	KEGG	hsa05010	Alzheimer disease	3	354	1.27	0.0245	9606.ENSP00000262139,9606.ENSP00000354558,9606.ENSP00000355231	WIPI1,MTOR,BECN1
6	KEGG	hsa05014	Amyotrophic lateral sclerosis	3	350	1.27	0.0245	9606.ENSP00000262139,9606.ENSP00000354558,9606.ENSP00000355231	WIPI1,MTOR,BECN1
6	KEGG	hsa04152	AMPK signaling pathway	2	120	1.56	0.0406	9606.ENSP00000312741,9606.ENSP00000354558	CAMKK2,MTOR
6	KEGG	hsa04068	FoxO signaling pathway	2	126	1.54	0.0409	9606.ENSP00000340608,9606.ENSP00000363377	SGK2,FOXO4
6	KEGG	hsa04371	Apelin signaling pathway	2	133	1.52	0.042	9606.ENSP00000354558,9606.ENSP00000355231	MTOR,BECN1
6	KEGG	hsa04150	mTOR signaling pathway	2	150	1.47	0.0493	9606.ENSP00000354558,9606.ENSP00000358423	MTOR,RRAGD
6	Reactome	HSA-9006925	Intracellular signaling by second messengers	5	306	1.55	0.00026	9606.ENSP00000262719,9606.ENSP00000312741,9606.ENSP00000354558,9606.ENSP00000358423,9606.ENSP00000363377	PHLPP1,CAMKK2,MTOR,RRAGD,FOXO4
6	Reactome	HSA-1632852	Macroautophagy	4	133	1.82	0.00031	9606.ENSP00000262139,9606.ENSP00000354558,9606.ENSP00000355231,9606.ENSP00000358423	WIPI1,MTOR,BECN1,RRAGD
6	Reactome	HSA-1257604	PIP3 activates AKT signaling	4	266	1.52	0.0023	9606.ENSP00000262719,9606.ENSP00000354558,9606.ENSP00000358423,9606.ENSP00000363377	PHLPP1,MTOR,RRAGD,FOXO4
6	Reactome	HSA-166208	mTORC1-mediated signalling	2	24	2.26	0.0274	9606.ENSP00000354558,9606.ENSP00000358423	MTOR,RRAGD
6	Reactome	HSA-5674400	Constitutive Signaling by AKT1 E17K in Cancer	2	26	2.23	0.0274	9606.ENSP00000354558,9606.ENSP00000363377	MTOR,FOXO4
6	Reactome	HSA-380972	Energy dependent regulation of mTOR by LKB1-AMPK	2	29	2.18	0.0279	9606.ENSP00000354558,9606.ENSP00000358423	MTOR,RRAGD
6	WikiPathways	WP4863	Host-pathogen interaction of human coronaviruses - autophagy	3	19	2.54	7.89e-05	9606.ENSP00000262139,9606.ENSP00000354558,9606.ENSP00000355231	WIPI1,MTOR,BECN1
6	WikiPathways	WP1471	Target of rapamycin signaling	3	36	2.26	0.00023	9606.ENSP00000354558,9606.ENSP00000358423,9606.ENSP00000368144	MTOR,RRAGD,PRR5L
6	WikiPathways	WP4577	Neurodegeneration with brain iron accumulation (NBIA) subtypes pathway	3	44	2.17	0.00028	9606.ENSP00000262139,9606.ENSP00000354558,9606.ENSP00000355231	WIPI1,MTOR,BECN1
6	WikiPathways	WP3844	PI3K-AKT-mTOR signaling pathway and therapeutic opportunities	2	30	2.16	0.0156	9606.ENSP00000354558,9606.ENSP00000363377	MTOR,FOXO4
6	WikiPathways	WP4874	CAMKK2 pathway	2	33	2.12	0.0156	9606.ENSP00000312741,9606.ENSP00000354558	CAMKK2,MTOR
6	WikiPathways	WP4923	Autophagy	2	30	2.16	0.0156	9606.ENSP00000354558,9606.ENSP00000355231	MTOR,BECN1
6	WikiPathways	WP5200	Dravet syndrome	2	28	2.19	0.0156	9606.ENSP00000354558,9606.ENSP00000368144	MTOR,PRR5L
6	WikiPathways	WP2059	Alzheimers disease and miRNA effects	3	260	1.4	0.0182	9606.ENSP00000262139,9606.ENSP00000354558,9606.ENSP00000355231	WIPI1,MTOR,BECN1
6	WikiPathways	WP5124	Alzheimers disease	3	260	1.4	0.0182	9606.ENSP00000262139,9606.ENSP00000354558,9606.ENSP00000355231	WIPI1,MTOR,BECN1
6	WikiPathways	WP1403	AMP-activated protein kinase signaling	2	67	1.82	0.0306	9606.ENSP00000312741,9606.ENSP00000354558	CAMKK2,MTOR
6	WikiPathways	WP4172	PI3K-Akt signaling pathway	3	336	1.29	0.0306	9606.ENSP00000262719,9606.ENSP00000340608,9606.ENSP00000354558	PHLPP1,SGK2,MTOR
6	WikiPathways	WP5205	Clock-controlled autophagy in bone metabolism	2	80	1.74	0.0393	9606.ENSP00000354558,9606.ENSP00000355231	MTOR,BECN1
6	WikiPathways	WP3888	VEGFA-VEGFR2 signaling	3	428	1.19	0.0475	9606.ENSP00000312741,9606.ENSP00000354558,9606.ENSP00000363377	CAMKK2,MTOR,FOXO4
7	GO Process	GO:1901565	Organonitrogen compound catabolic process	6	1113	1.12	0.0033	9606.ENSP00000269439,9606.ENSP00000278060,9606.ENSP00000341361,9606.ENSP00000349298,9606.ENSP00000363019,9606.ENSP00000381717	RNF165,PAOX,RNF13,MYLIP,UBE2D1,UBE2D2
7	GO Process	GO:0000209	Protein polyubiquitination	4	229	1.63	0.004	9606.ENSP00000269439,9606.ENSP00000363019,9606.ENSP00000381717,9606.ENSP00000411848	RNF165,UBE2D1,UBE2D2,MARCHF8
7	GO Process	GO:0030163	Protein catabolic process	5	755	1.21	0.0112	9606.ENSP00000269439,9606.ENSP00000341361,9606.ENSP00000349298,9606.ENSP00000363019,9606.ENSP00000381717	RNF165,RNF13,MYLIP,UBE2D1,UBE2D2
7	GO Function	GO:0061630	Ubiquitin protein ligase activity	6	315	1.67	2.4e-06	9606.ENSP00000269439,9606.ENSP00000341361,9606.ENSP00000349298,9606.ENSP00000363019,9606.ENSP00000381717,9606.ENSP00000411848	RNF165,RNF13,MYLIP,UBE2D1,UBE2D2,MARCHF8
7	Reactome	HSA-9033241	Peroxisomal protein import	4	62	2.2	1.81e-05	9606.ENSP00000278060,9606.ENSP00000331106,9606.ENSP00000363019,9606.ENSP00000381717	PAOX,PEX26,UBE2D1,UBE2D2
7	Reactome	HSA-168927	TICAM1, RIP1-mediated IKK complex recruitment	2	17	2.46	0.0187	9606.ENSP00000363019,9606.ENSP00000381717	UBE2D1,UBE2D2
7	Reactome	HSA-937041	IKK complex recruitment mediated by RIP1	2	21	2.37	0.0207	9606.ENSP00000363019,9606.ENSP00000381717	UBE2D1,UBE2D2
7	Reactome	HSA-9705462	Inactivation of CSF3 (G-CSF) signaling	2	24	2.31	0.0213	9606.ENSP00000363019,9606.ENSP00000381717	UBE2D1,UBE2D2
7	Reactome	HSA-8866652	Synthesis of active ubiquitin: roles of E1 and E2 enzymes	2	29	2.23	0.0254	9606.ENSP00000363019,9606.ENSP00000381717	UBE2D1,UBE2D2
7	Reactome	HSA-936440	Negative regulators of DDX58/IFIH1 signaling	2	34	2.16	0.0257	9606.ENSP00000363019,9606.ENSP00000381717	UBE2D1,UBE2D2
7	Reactome	HSA-5357905	Regulation of TNFR1 signaling	2	46	2.03	0.0409	9606.ENSP00000363019,9606.ENSP00000381717	UBE2D1,UBE2D2
7	Reactome	HSA-8866654	E3 ubiquitin ligases ubiquitinate target proteins	2	53	1.97	0.0447	9606.ENSP00000363019,9606.ENSP00000381717	UBE2D1,UBE2D2
7	Reactome	HSA-983168	Antigen processing: Ubiquitination & Proteasome degradation	3	303	1.39	0.0447	9606.ENSP00000349298,9606.ENSP00000363019,9606.ENSP00000381717	MYLIP,UBE2D1,UBE2D2
7	UniProt Keywords	KW-0833	Ubl conjugation pathway	5	695	1.25	0.0019	9606.ENSP00000269439,9606.ENSP00000341361,9606.ENSP00000349298,9606.ENSP00000363019,9606.ENSP00000381717	RNF165,RNF13,MYLIP,UBE2D1,UBE2D2
8	GO Process	GO:0016055	Wnt signaling pathway	7	284	1.78	9.13e-09	9606.ENSP00000264634,9606.ENSP00000290167,9606.ENSP00000295113,9606.ENSP00000301061,9606.ENSP00000341032,9606.ENSP00000354607,9606.ENSP00000364860	WNT5A,WNT4,FRZB,WNT10B,WNT7B,FZD5,ROR2
8	GO Process	GO:0060070	Canonical Wnt signaling pathway	6	100	2.17	9.13e-09	9606.ENSP00000264634,9606.ENSP00000290167,9606.ENSP00000295113,9606.ENSP00000301061,9606.ENSP00000341032,9606.ENSP00000354607	WNT5A,WNT4,FRZB,WNT10B,WNT7B,FZD5
8	GO Process	GO:0007166	Cell surface receptor signaling pathway	8	2040	0.98	3.62e-05	9606.ENSP00000264634,9606.ENSP00000290167,9606.ENSP00000295113,9606.ENSP00000301061,9606.ENSP00000341032,9606.ENSP00000354607,9606.ENSP00000362746,9606.ENSP00000364860	WNT5A,WNT4,FRZB,WNT10B,WNT7B,FZD5,GPR21,ROR2
8	GO Process	GO:0030855	Epithelial cell differentiation	6	617	1.38	5.79e-05	9606.ENSP00000264634,9606.ENSP00000290167,9606.ENSP00000295113,9606.ENSP00000301061,9606.ENSP00000341032,9606.ENSP00000354607	WNT5A,WNT4,FRZB,WNT10B,WNT7B,FZD5
8	GO Process	GO:0051094	Positive regulation of developmental process	7	1332	1.11	9.72e-05	9606.ENSP00000264634,9606.ENSP00000290167,9606.ENSP00000295113,9606.ENSP00000301061,9606.ENSP00000341032,9606.ENSP00000362746,9606.ENSP00000364860	WNT5A,WNT4,FRZB,WNT10B,WNT7B,GPR21,ROR2
8	GO Process	GO:0002009	Morphogenesis of an epithelium	5	457	1.43	0.00048	9606.ENSP00000264634,9606.ENSP00000290167,9606.ENSP00000295113,9606.ENSP00000341032,9606.ENSP00000354607	WNT5A,WNT4,FRZB,WNT7B,FZD5
8	GO Process	GO:0009887	Animal organ morphogenesis	6	997	1.17	0.00048	9606.ENSP00000264634,9606.ENSP00000290167,9606.ENSP00000295113,9606.ENSP00000301061,9606.ENSP00000341032,9606.ENSP00000354607	WNT5A,WNT4,FRZB,WNT10B,WNT7B,FZD5
8	GO Process	GO:0009888	Tissue development	7	1723	1	0.00048	9606.ENSP00000264634,9606.ENSP00000290167,9606.ENSP00000295113,9606.ENSP00000301061,9606.ENSP00000341032,9606.ENSP00000354607,9606.ENSP00000364860	WNT5A,WNT4,FRZB,WNT10B,WNT7B,FZD5,ROR2
8	GO Process	GO:0009966	Regulation of signal transduction	8	2978	0.82	0.00048	9606.ENSP00000264634,9606.ENSP00000290167,9606.ENSP00000295113,9606.ENSP00000301061,9606.ENSP00000341032,9606.ENSP00000354607,9606.ENSP00000362746,9606.ENSP00000364860	WNT5A,WNT4,FRZB,WNT10B,WNT7B,FZD5,GPR21,ROR2
8	GO Process	GO:0048468	Cell development	7	1719	1	0.00048	9606.ENSP00000264634,9606.ENSP00000290167,9606.ENSP00000295113,9606.ENSP00000301061,9606.ENSP00000341032,9606.ENSP00000354607,9606.ENSP00000364860	WNT5A,WNT4,FRZB,WNT10B,WNT7B,FZD5,ROR2
8	GO Process	GO:0048608	Reproductive structure development	5	436	1.45	0.00048	9606.ENSP00000264634,9606.ENSP00000290167,9606.ENSP00000341032,9606.ENSP00000354607,9606.ENSP00000364860	WNT5A,WNT4,WNT7B,FZD5,ROR2
8	GO Process	GO:0002064	Epithelial cell development	4	190	1.71	0.00061	9606.ENSP00000264634,9606.ENSP00000295113,9606.ENSP00000341032,9606.ENSP00000354607	WNT5A,FRZB,WNT7B,FZD5
8	GO Process	GO:0043507	Positive regulation of JUN kinase activity	3	42	2.25	0.00061	9606.ENSP00000264634,9606.ENSP00000354607,9606.ENSP00000364860	WNT5A,FZD5,ROR2
8	GO Process	GO:0035567	Non-canonical Wnt signaling pathway	3	47	2.2	0.00064	9606.ENSP00000264634,9606.ENSP00000290167,9606.ENSP00000364860	WNT5A,WNT4,ROR2
8	GO Process	GO:0051885	Positive regulation of timing of anagen	2	2	3.39	0.00064	9606.ENSP00000264634,9606.ENSP00000301061	WNT5A,WNT10B
8	GO Process	GO:0007423	Sensory organ development	5	577	1.33	0.00075	9606.ENSP00000264634,9606.ENSP00000295113,9606.ENSP00000301061,9606.ENSP00000341032,9606.ENSP00000354607	WNT5A,FRZB,WNT10B,WNT7B,FZD5
8	GO Process	GO:0045778	Positive regulation of ossification	3	54	2.14	0.0008	9606.ENSP00000264634,9606.ENSP00000290167,9606.ENSP00000301061	WNT5A,WNT4,WNT10B
8	GO Process	GO:0048598	Embryonic morphogenesis	5	590	1.32	0.0008	9606.ENSP00000264634,9606.ENSP00000290167,9606.ENSP00000295113,9606.ENSP00000341032,9606.ENSP00000354607	WNT5A,WNT4,FRZB,WNT7B,FZD5
8	GO Process	GO:0022008	Neurogenesis	6	1290	1.06	0.001	9606.ENSP00000264634,9606.ENSP00000290167,9606.ENSP00000301061,9606.ENSP00000341032,9606.ENSP00000354607,9606.ENSP00000364860	WNT5A,WNT4,WNT10B,WNT7B,FZD5,ROR2
8	GO Process	GO:0045165	Cell fate commitment	4	250	1.6	0.001	9606.ENSP00000264634,9606.ENSP00000290167,9606.ENSP00000301061,9606.ENSP00000341032	WNT5A,WNT4,WNT10B,WNT7B
8	GO Process	GO:0061180	Mammary gland epithelium development	3	61	2.08	0.001	9606.ENSP00000264634,9606.ENSP00000290167,9606.ENSP00000341032	WNT5A,WNT4,WNT7B
8	GO Process	GO:0002067	Glandular epithelial cell differentiation	3	65	2.06	0.0011	9606.ENSP00000264634,9606.ENSP00000290167,9606.ENSP00000354607	WNT5A,WNT4,FZD5
8	GO Process	GO:0045669	Positive regulation of osteoblast differentiation	3	68	2.04	0.0012	9606.ENSP00000290167,9606.ENSP00000301061,9606.ENSP00000341032	WNT4,WNT10B,WNT7B
8	GO Process	GO:0071300	Cellular response to retinoic acid	3	68	2.04	0.0012	9606.ENSP00000264634,9606.ENSP00000301061,9606.ENSP00000341032	WNT5A,WNT10B,WNT7B
8	GO Process	GO:0060029	Convergent extension involved in organogenesis	2	5	2.99	0.0014	9606.ENSP00000264634,9606.ENSP00000295113	WNT5A,FRZB
8	GO Process	GO:0072089	Stem cell proliferation	3	78	1.98	0.0015	9606.ENSP00000264634,9606.ENSP00000301061,9606.ENSP00000341032	WNT5A,WNT10B,WNT7B
8	GO Process	GO:0038030	Non-canonical Wnt signaling pathway via MAPK cascade	2	6	2.91	0.0016	9606.ENSP00000264634,9606.ENSP00000290167	WNT5A,WNT4
8	GO Process	GO:0051240	Positive regulation of multicellular organismal process	6	1505	0.99	0.0019	9606.ENSP00000264634,9606.ENSP00000290167,9606.ENSP00000301061,9606.ENSP00000354607,9606.ENSP00000362746,9606.ENSP00000364860	WNT5A,WNT4,WNT10B,FZD5,GPR21,ROR2
8	GO Process	GO:1900020	Positive regulation of protein kinase C activity	2	7	2.85	0.0019	9606.ENSP00000264634,9606.ENSP00000364860	WNT5A,ROR2
8	GO Process	GO:0045595	Regulation of cell differentiation	6	1582	0.97	0.0023	9606.ENSP00000264634,9606.ENSP00000290167,9606.ENSP00000295113,9606.ENSP00000301061,9606.ENSP00000341032,9606.ENSP00000364860	WNT5A,WNT4,FRZB,WNT10B,WNT7B,ROR2
8	GO Process	GO:0051239	Regulation of multicellular organismal process	7	2749	0.8	0.0025	9606.ENSP00000264634,9606.ENSP00000290167,9606.ENSP00000295113,9606.ENSP00000301061,9606.ENSP00000354607,9606.ENSP00000362746,9606.ENSP00000364860	WNT5A,WNT4,FRZB,WNT10B,FZD5,GPR21,ROR2
8	GO Process	GO:1902035	Positive regulation of hematopoietic stem cell proliferation	2	9	2.74	0.0027	9606.ENSP00000264634,9606.ENSP00000301061	WNT5A,WNT10B
8	GO Process	GO:0045597	Positive regulation of cell differentiation	5	876	1.15	0.0029	9606.ENSP00000290167,9606.ENSP00000295113,9606.ENSP00000301061,9606.ENSP00000341032,9606.ENSP00000364860	WNT4,FRZB,WNT10B,WNT7B,ROR2
8	GO Process	GO:0048732	Gland development	4	419	1.37	0.0039	9606.ENSP00000264634,9606.ENSP00000290167,9606.ENSP00000295113,9606.ENSP00000341032	WNT5A,WNT4,FRZB,WNT7B
8	GO Process	GO:0007169	Transmembrane receptor protein tyrosine kinase signaling pathway	4	425	1.37	0.0041	9606.ENSP00000264634,9606.ENSP00000290167,9606.ENSP00000362746,9606.ENSP00000364860	WNT5A,WNT4,GPR21,ROR2
8	GO Process	GO:2000027	Regulation of animal organ morphogenesis	3	127	1.76	0.0041	9606.ENSP00000264634,9606.ENSP00000290167,9606.ENSP00000364860	WNT5A,WNT4,ROR2
8	GO Process	GO:0045598	Regulation of fat cell differentiation	3	135	1.74	0.0046	9606.ENSP00000264634,9606.ENSP00000295113,9606.ENSP00000301061	WNT5A,FRZB,WNT10B
8	GO Process	GO:0048568	Embryonic organ development	4	454	1.34	0.0047	9606.ENSP00000264634,9606.ENSP00000295113,9606.ENSP00000341032,9606.ENSP00000354607	WNT5A,FRZB,WNT7B,FZD5
8	GO Process	GO:0045836	Positive regulation of meiotic nuclear division	2	16	2.49	0.0051	9606.ENSP00000264634,9606.ENSP00000290167	WNT5A,WNT4
8	GO Process	GO:0030182	Neuron differentiation	5	1062	1.06	0.0052	9606.ENSP00000264634,9606.ENSP00000290167,9606.ENSP00000301061,9606.ENSP00000341032,9606.ENSP00000354607	WNT5A,WNT4,WNT10B,WNT7B,FZD5
8	GO Process	GO:0043410	Positive regulation of MAPK cascade	4	481	1.31	0.0052	9606.ENSP00000264634,9606.ENSP00000341032,9606.ENSP00000354607,9606.ENSP00000364860	WNT5A,WNT7B,FZD5,ROR2
8	GO Process	GO:0048513	Animal organ development	7	3246	0.73	0.0052	9606.ENSP00000264634,9606.ENSP00000290167,9606.ENSP00000295113,9606.ENSP00000301061,9606.ENSP00000341032,9606.ENSP00000354607,9606.ENSP00000364860	WNT5A,WNT4,FRZB,WNT10B,WNT7B,FZD5,ROR2
8	GO Process	GO:0016331	Morphogenesis of embryonic epithelium	3	149	1.7	0.0053	9606.ENSP00000264634,9606.ENSP00000290167,9606.ENSP00000341032	WNT5A,WNT4,WNT7B
8	GO Process	GO:0040037	Negative regulation of fibroblast growth factor receptor signaling pathway	2	18	2.44	0.0059	9606.ENSP00000264634,9606.ENSP00000290167	WNT5A,WNT4
8	GO Process	GO:0001501	Skeletal system development	4	513	1.28	0.0064	9606.ENSP00000264634,9606.ENSP00000295113,9606.ENSP00000301061,9606.ENSP00000341032	WNT5A,FRZB,WNT10B,WNT7B
8	GO Process	GO:0061138	Morphogenesis of a branching epithelium	3	162	1.66	0.0064	9606.ENSP00000264634,9606.ENSP00000290167,9606.ENSP00000354607	WNT5A,WNT4,FZD5
8	GO Process	GO:0072170	Metanephric tubule development	2	19	2.41	0.0064	9606.ENSP00000290167,9606.ENSP00000341032	WNT4,WNT7B
8	GO Process	GO:0046661	Male sex differentiation	3	168	1.64	0.0068	9606.ENSP00000264634,9606.ENSP00000290167,9606.ENSP00000364860	WNT5A,WNT4,ROR2
8	GO Process	GO:0051216	Cartilage development	3	167	1.65	0.0068	9606.ENSP00000264634,9606.ENSP00000301061,9606.ENSP00000341032	WNT5A,WNT10B,WNT7B
8	GO Process	GO:0030217	T cell differentiation	3	171	1.64	0.007	9606.ENSP00000290167,9606.ENSP00000301061,9606.ENSP00000354607	WNT4,WNT10B,FZD5
8	GO Process	GO:0048762	Mesenchymal cell differentiation	3	170	1.64	0.007	9606.ENSP00000264634,9606.ENSP00000290167,9606.ENSP00000295113	WNT5A,WNT4,FRZB
8	GO Process	GO:0008595	Anterior/posterior axis specification, embryo	2	22	2.35	0.0073	9606.ENSP00000264634,9606.ENSP00000354607	WNT5A,FZD5
8	GO Process	GO:0060444	Branching involved in mammary gland duct morphogenesis	2	22	2.35	0.0073	9606.ENSP00000264634,9606.ENSP00000290167	WNT5A,WNT4
8	GO Process	GO:0060713	Labyrinthine layer morphogenesis	2	22	2.35	0.0073	9606.ENSP00000341032,9606.ENSP00000354607	WNT7B,FZD5
8	GO Process	GO:0071425	Hematopoietic stem cell proliferation	2	24	2.31	0.0079	9606.ENSP00000264634,9606.ENSP00000301061	WNT5A,WNT10B
8	GO Process	GO:0090103	Cochlea morphogenesis	2	25	2.29	0.0083	9606.ENSP00000264634,9606.ENSP00000295113	WNT5A,FRZB
8	GO Process	GO:0048596	Embryonic camera-type eye morphogenesis	2	26	2.28	0.0088	9606.ENSP00000264634,9606.ENSP00000354607	WNT5A,FZD5
8	GO Process	GO:0031128	Developmental induction	2	27	2.26	0.0092	9606.ENSP00000290167,9606.ENSP00000354607	WNT4,FZD5
8	GO Process	GO:1901888	Regulation of cell junction assembly	3	201	1.57	0.0092	9606.ENSP00000264634,9606.ENSP00000290167,9606.ENSP00000354607	WNT5A,WNT4,FZD5
8	GO Process	GO:0003338	Metanephros morphogenesis	2	28	2.25	0.0096	9606.ENSP00000290167,9606.ENSP00000341032	WNT4,WNT7B
8	GO Process	GO:0002068	Glandular epithelial cell development	2	29	2.23	0.0101	9606.ENSP00000264634,9606.ENSP00000354607	WNT5A,FZD5
8	GO Process	GO:0051128	Regulation of cellular component organization	6	2365	0.8	0.0102	9606.ENSP00000264634,9606.ENSP00000290167,9606.ENSP00000295113,9606.ENSP00000301061,9606.ENSP00000354607,9606.ENSP00000364860	WNT5A,WNT4,FRZB,WNT10B,FZD5,ROR2
8	GO Process	GO:0009719	Response to endogenous stimulus	5	1363	0.96	0.011	9606.ENSP00000264634,9606.ENSP00000290167,9606.ENSP00000301061,9606.ENSP00000341032,9606.ENSP00000362746	WNT5A,WNT4,WNT10B,WNT7B,GPR21
8	GO Process	GO:0048731	System development	7	3867	0.65	0.011	9606.ENSP00000264634,9606.ENSP00000290167,9606.ENSP00000295113,9606.ENSP00000301061,9606.ENSP00000341032,9606.ENSP00000354607,9606.ENSP00000364860	WNT5A,WNT4,FRZB,WNT10B,WNT7B,FZD5,ROR2
8	GO Process	GO:0030097	Hemopoiesis	4	655	1.18	0.0111	9606.ENSP00000264634,9606.ENSP00000290167,9606.ENSP00000301061,9606.ENSP00000354607	WNT5A,WNT4,WNT10B,FZD5
8	GO Process	GO:0035239	Tube morphogenesis	4	669	1.17	0.0113	9606.ENSP00000264634,9606.ENSP00000290167,9606.ENSP00000341032,9606.ENSP00000354607	WNT5A,WNT4,WNT7B,FZD5
8	GO Process	GO:0110110	Positive regulation of animal organ morphogenesis	2	32	2.19	0.0113	9606.ENSP00000264634,9606.ENSP00000290167	WNT5A,WNT4
8	GO Process	GO:2000026	Regulation of multicellular organismal development	5	1389	0.95	0.0113	9606.ENSP00000264634,9606.ENSP00000290167,9606.ENSP00000295113,9606.ENSP00000301061,9606.ENSP00000364860	WNT5A,WNT4,FRZB,WNT10B,ROR2
8	GO Process	GO:0045596	Negative regulation of cell differentiation	4	685	1.16	0.0122	9606.ENSP00000264634,9606.ENSP00000290167,9606.ENSP00000295113,9606.ENSP00000301061	WNT5A,WNT4,FRZB,WNT10B
8	GO Process	GO:0048518	Positive regulation of biological process	8	6207	0.5	0.0125	9606.ENSP00000264634,9606.ENSP00000290167,9606.ENSP00000295113,9606.ENSP00000301061,9606.ENSP00000341032,9606.ENSP00000354607,9606.ENSP00000362746,9606.ENSP00000364860	WNT5A,WNT4,FRZB,WNT10B,WNT7B,FZD5,GPR21,ROR2
8	GO Process	GO:0008283	Cell population proliferation	4	712	1.14	0.0135	9606.ENSP00000264634,9606.ENSP00000290167,9606.ENSP00000301061,9606.ENSP00000341032	WNT5A,WNT4,WNT10B,WNT7B
8	GO Process	GO:0008285	Negative regulation of cell population proliferation	4	713	1.14	0.0135	9606.ENSP00000264634,9606.ENSP00000295113,9606.ENSP00000301061,9606.ENSP00000354607	WNT5A,FRZB,WNT10B,FZD5
8	GO Process	GO:0060828	Regulation of canonical Wnt signaling pathway	3	251	1.47	0.0139	9606.ENSP00000264634,9606.ENSP00000295113,9606.ENSP00000301061	WNT5A,FRZB,WNT10B
8	GO Process	GO:0090068	Positive regulation of cell cycle process	3	251	1.47	0.0139	9606.ENSP00000264634,9606.ENSP00000290167,9606.ENSP00000301061	WNT5A,WNT4,WNT10B
8	GO Process	GO:0060071	Wnt signaling pathway, planar cell polarity pathway	2	40	2.09	0.0147	9606.ENSP00000264634,9606.ENSP00000364860	WNT5A,ROR2
8	GO Process	GO:0009967	Positive regulation of signal transduction	5	1525	0.91	0.0152	9606.ENSP00000264634,9606.ENSP00000301061,9606.ENSP00000341032,9606.ENSP00000354607,9606.ENSP00000364860	WNT5A,WNT10B,WNT7B,FZD5,ROR2
8	GO Process	GO:0021983	Pituitary gland development	2	43	2.06	0.0162	9606.ENSP00000264634,9606.ENSP00000290167	WNT5A,WNT4
8	GO Process	GO:0010033	Response to organic substance	6	2692	0.74	0.0163	9606.ENSP00000264634,9606.ENSP00000290167,9606.ENSP00000301061,9606.ENSP00000341032,9606.ENSP00000354607,9606.ENSP00000362746	WNT5A,WNT4,WNT10B,WNT7B,FZD5,GPR21
8	GO Process	GO:0030501	Positive regulation of bone mineralization	2	44	2.05	0.0167	9606.ENSP00000290167,9606.ENSP00000301061	WNT4,WNT10B
8	GO Process	GO:0090596	Sensory organ morphogenesis	3	276	1.43	0.0167	9606.ENSP00000264634,9606.ENSP00000295113,9606.ENSP00000354607	WNT5A,FRZB,FZD5
8	GO Process	GO:0044093	Positive regulation of molecular function	5	1587	0.89	0.0171	9606.ENSP00000264634,9606.ENSP00000290167,9606.ENSP00000301061,9606.ENSP00000354607,9606.ENSP00000364860	WNT5A,WNT4,WNT10B,FZD5,ROR2
8	GO Process	GO:0048806	Genitalia development	2	47	2.02	0.018	9606.ENSP00000264634,9606.ENSP00000364860	WNT5A,ROR2
8	GO Process	GO:0001822	Kidney development	3	296	1.4	0.0193	9606.ENSP00000264634,9606.ENSP00000290167,9606.ENSP00000341032	WNT5A,WNT4,WNT7B
8	GO Process	GO:0050808	Synapse organization	3	298	1.39	0.0195	9606.ENSP00000264634,9606.ENSP00000341032,9606.ENSP00000354607	WNT5A,WNT7B,FZD5
8	GO Process	GO:0048562	Embryonic organ morphogenesis	3	300	1.39	0.0196	9606.ENSP00000264634,9606.ENSP00000295113,9606.ENSP00000354607	WNT5A,FRZB,FZD5
8	GO Process	GO:0045599	Negative regulation of fat cell differentiation	2	52	1.98	0.0207	9606.ENSP00000264634,9606.ENSP00000301061	WNT5A,WNT10B
8	GO Process	GO:0002684	Positive regulation of immune system process	4	874	1.05	0.0231	9606.ENSP00000264634,9606.ENSP00000301061,9606.ENSP00000354607,9606.ENSP00000364860	WNT5A,WNT10B,FZD5,ROR2
8	GO Process	GO:0008543	Fibroblast growth factor receptor signaling pathway	2	58	1.93	0.024	9606.ENSP00000264634,9606.ENSP00000290167	WNT5A,WNT4
8	GO Process	GO:0043010	Camera-type eye development	3	334	1.34	0.0246	9606.ENSP00000264634,9606.ENSP00000341032,9606.ENSP00000354607	WNT5A,WNT7B,FZD5
8	GO Process	GO:0003002	Regionalization	3	341	1.34	0.0257	9606.ENSP00000264634,9606.ENSP00000341032,9606.ENSP00000354607	WNT5A,WNT7B,FZD5
8	GO Process	GO:0032731	Positive regulation of interleukin-1 beta production	2	61	1.91	0.0257	9606.ENSP00000264634,9606.ENSP00000354607	WNT5A,FZD5
8	GO Process	GO:0033077	T cell differentiation in thymus	2	63	1.89	0.027	9606.ENSP00000290167,9606.ENSP00000354607	WNT4,FZD5
8	GO Process	GO:0048646	Anatomical structure formation involved in morphogenesis	4	938	1.02	0.0277	9606.ENSP00000264634,9606.ENSP00000290167,9606.ENSP00000301061,9606.ENSP00000354607	WNT5A,WNT4,WNT10B,FZD5
8	GO Process	GO:1905330	Regulation of morphogenesis of an epithelium	2	65	1.88	0.0279	9606.ENSP00000264634,9606.ENSP00000290167	WNT5A,WNT4
8	GO Process	GO:0044087	Regulation of cellular component biogenesis	4	971	1.01	0.0313	9606.ENSP00000264634,9606.ENSP00000290167,9606.ENSP00000301061,9606.ENSP00000354607	WNT5A,WNT4,WNT10B,FZD5
8	GO Process	GO:0061035	Regulation of cartilage development	2	72	1.84	0.0336	9606.ENSP00000264634,9606.ENSP00000295113	WNT5A,FRZB
8	GO Process	GO:2000242	Negative regulation of reproductive process	2	74	1.82	0.0343	9606.ENSP00000264634,9606.ENSP00000290167	WNT5A,WNT4
8	GO Process	GO:0030900	Forebrain development	3	391	1.28	0.0348	9606.ENSP00000264634,9606.ENSP00000290167,9606.ENSP00000341032	WNT5A,WNT4,WNT7B
8	GO Process	GO:0032729	Positive regulation of interferon-gamma production	2	78	1.8	0.0368	9606.ENSP00000264634,9606.ENSP00000354607	WNT5A,FZD5
8	GO Process	GO:0007417	Central nervous system development	4	1035	0.98	0.037	9606.ENSP00000264634,9606.ENSP00000290167,9606.ENSP00000341032,9606.ENSP00000364860	WNT5A,WNT4,WNT7B,ROR2
8	GO Process	GO:0051241	Negative regulation of multicellular organismal process	4	1035	0.98	0.037	9606.ENSP00000264634,9606.ENSP00000290167,9606.ENSP00000295113,9606.ENSP00000301061	WNT5A,WNT4,FRZB,WNT10B
8	GO Process	GO:0001837	Epithelial to mesenchymal transition	2	79	1.79	0.0372	9606.ENSP00000264634,9606.ENSP00000290167	WNT5A,WNT4
8	GO Process	GO:0002088	Lens development in camera-type eye	2	81	1.78	0.0382	9606.ENSP00000264634,9606.ENSP00000341032	WNT5A,WNT7B
8	GO Process	GO:0002720	Positive regulation of cytokine production involved in immune response	2	81	1.78	0.0382	9606.ENSP00000264634,9606.ENSP00000354607	WNT5A,FZD5
8	GO Process	GO:0048589	Developmental growth	3	412	1.25	0.0382	9606.ENSP00000264634,9606.ENSP00000301061,9606.ENSP00000341032	WNT5A,WNT10B,WNT7B
8	GO Process	GO:0051130	Positive regulation of cellular component organization	4	1049	0.97	0.0382	9606.ENSP00000264634,9606.ENSP00000290167,9606.ENSP00000301061,9606.ENSP00000364860	WNT5A,WNT4,WNT10B,ROR2
8	GO Process	GO:0061053	Somite development	2	82	1.78	0.0382	9606.ENSP00000264634,9606.ENSP00000295113	WNT5A,FRZB
8	GO Process	GO:0071310	Cellular response to organic substance	5	2019	0.79	0.0382	9606.ENSP00000264634,9606.ENSP00000290167,9606.ENSP00000301061,9606.ENSP00000341032,9606.ENSP00000362746	WNT5A,WNT4,WNT10B,WNT7B,GPR21
8	GO Process	GO:0072080	Nephron tubule development	2	82	1.78	0.0382	9606.ENSP00000290167,9606.ENSP00000341032	WNT4,WNT7B
8	GO Process	GO:1901701	Cellular response to oxygen-containing compound	4	1057	0.97	0.0382	9606.ENSP00000264634,9606.ENSP00000301061,9606.ENSP00000341032,9606.ENSP00000362746	WNT5A,WNT10B,WNT7B,GPR21
8	GO Process	GO:0071495	Cellular response to endogenous stimulus	4	1103	0.95	0.0425	9606.ENSP00000264634,9606.ENSP00000290167,9606.ENSP00000301061,9606.ENSP00000362746	WNT5A,WNT4,WNT10B,GPR21
8	GO Process	GO:0002376	Immune system process	5	2121	0.76	0.0447	9606.ENSP00000264634,9606.ENSP00000290167,9606.ENSP00000301061,9606.ENSP00000354607,9606.ENSP00000364860	WNT5A,WNT4,WNT10B,FZD5,ROR2
8	GO Process	GO:0046330	Positive regulation of JNK cascade	2	96	1.71	0.0475	9606.ENSP00000264634,9606.ENSP00000341032	WNT5A,WNT7B
8	GO Function	GO:0005109	Frizzled binding	4	38	2.41	6.11e-06	9606.ENSP00000264634,9606.ENSP00000290167,9606.ENSP00000301061,9606.ENSP00000341032	WNT5A,WNT4,WNT10B,WNT7B
8	GO Function	GO:0017147	Wnt-protein binding	3	30	2.39	0.00059	9606.ENSP00000295113,9606.ENSP00000354607,9606.ENSP00000364860	FRZB,FZD5,ROR2
8	GO Function	GO:0005125	Cytokine activity	4	234	1.62	0.0023	9606.ENSP00000264634,9606.ENSP00000290167,9606.ENSP00000301061,9606.ENSP00000341032	WNT5A,WNT4,WNT10B,WNT7B
8	GO Component	GO:0030666	Endocytic vesicle membrane	5	191	1.81	1.03e-05	9606.ENSP00000264634,9606.ENSP00000290167,9606.ENSP00000341032,9606.ENSP00000354607,9606.ENSP00000364860	WNT5A,WNT4,WNT7B,FZD5,ROR2
8	GO Component	GO:0030669	Clathrin-coated endocytic vesicle membrane	3	70	2.02	0.0018	9606.ENSP00000264634,9606.ENSP00000354607,9606.ENSP00000364860	WNT5A,FZD5,ROR2
8	GO Component	GO:0005796	Golgi lumen	3	106	1.84	0.0037	9606.ENSP00000264634,9606.ENSP00000290167,9606.ENSP00000341032	WNT5A,WNT4,WNT7B
8	GO Component	GO:0005788	Endoplasmic reticulum lumen	3	312	1.37	0.0379	9606.ENSP00000264634,9606.ENSP00000290167,9606.ENSP00000341032	WNT5A,WNT4,WNT7B
8	GO Component	GO:0009986	Cell surface	4	894	1.04	0.0407	9606.ENSP00000264634,9606.ENSP00000290167,9606.ENSP00000354607,9606.ENSP00000364860	WNT5A,WNT4,FZD5,ROR2
8	KEGG	hsa04310	Wnt signaling pathway	6	154	1.98	2.42e-09	9606.ENSP00000264634,9606.ENSP00000290167,9606.ENSP00000301061,9606.ENSP00000341032,9606.ENSP00000354607,9606.ENSP00000364860	WNT5A,WNT4,WNT10B,WNT7B,FZD5,ROR2
8	KEGG	hsa05217	Basal cell carcinoma	5	63	2.29	3.93e-09	9606.ENSP00000264634,9606.ENSP00000290167,9606.ENSP00000301061,9606.ENSP00000341032,9606.ENSP00000354607	WNT5A,WNT4,WNT10B,WNT7B,FZD5
8	KEGG	hsa04916	Melanogenesis	5	95	2.11	1.88e-08	9606.ENSP00000264634,9606.ENSP00000290167,9606.ENSP00000301061,9606.ENSP00000341032,9606.ENSP00000354607	WNT5A,WNT4,WNT10B,WNT7B,FZD5
8	KEGG	hsa04150	mTOR signaling pathway	5	150	1.91	9.63e-08	9606.ENSP00000264634,9606.ENSP00000290167,9606.ENSP00000301061,9606.ENSP00000341032,9606.ENSP00000354607	WNT5A,WNT4,WNT10B,WNT7B,FZD5
8	KEGG	hsa04390	Hippo signaling pathway	5	154	1.9	9.63e-08	9606.ENSP00000264634,9606.ENSP00000290167,9606.ENSP00000301061,9606.ENSP00000341032,9606.ENSP00000354607	WNT5A,WNT4,WNT10B,WNT7B,FZD5
8	KEGG	hsa04550	Signaling pathways regulating pluripotency of stem cells	5	141	1.94	9.63e-08	9606.ENSP00000264634,9606.ENSP00000290167,9606.ENSP00000301061,9606.ENSP00000341032,9606.ENSP00000354607	WNT5A,WNT4,WNT10B,WNT7B,FZD5
8	KEGG	hsa04934	Cushing syndrome	5	153	1.91	9.63e-08	9606.ENSP00000264634,9606.ENSP00000290167,9606.ENSP00000301061,9606.ENSP00000341032,9606.ENSP00000354607	WNT5A,WNT4,WNT10B,WNT7B,FZD5
8	KEGG	hsa05224	Breast cancer	5	146	1.93	9.63e-08	9606.ENSP00000264634,9606.ENSP00000290167,9606.ENSP00000301061,9606.ENSP00000341032,9606.ENSP00000354607	WNT5A,WNT4,WNT10B,WNT7B,FZD5
8	KEGG	hsa05225	Hepatocellular carcinoma	5	161	1.88	9.63e-08	9606.ENSP00000264634,9606.ENSP00000290167,9606.ENSP00000301061,9606.ENSP00000341032,9606.ENSP00000354607	WNT5A,WNT4,WNT10B,WNT7B,FZD5
8	KEGG	hsa05226	Gastric cancer	5	146	1.93	9.63e-08	9606.ENSP00000264634,9606.ENSP00000290167,9606.ENSP00000301061,9606.ENSP00000341032,9606.ENSP00000354607	WNT5A,WNT4,WNT10B,WNT7B,FZD5
8	KEGG	hsa05205	Proteoglycans in cancer	5	194	1.8	1.67e-07	9606.ENSP00000264634,9606.ENSP00000290167,9606.ENSP00000301061,9606.ENSP00000341032,9606.ENSP00000354607	WNT5A,WNT4,WNT10B,WNT7B,FZD5
8	KEGG	hsa05165	Human papillomavirus infection	5	324	1.58	1.89e-06	9606.ENSP00000264634,9606.ENSP00000290167,9606.ENSP00000301061,9606.ENSP00000341032,9606.ENSP00000354607	WNT5A,WNT4,WNT10B,WNT7B,FZD5
8	KEGG	hsa05010	Alzheimer disease	5	354	1.54	2.7e-06	9606.ENSP00000264634,9606.ENSP00000290167,9606.ENSP00000301061,9606.ENSP00000341032,9606.ENSP00000354607	WNT5A,WNT4,WNT10B,WNT7B,FZD5
8	KEGG	hsa05200	Pathways in cancer	5	515	1.38	1.58e-05	9606.ENSP00000264634,9606.ENSP00000290167,9606.ENSP00000301061,9606.ENSP00000341032,9606.ENSP00000354607	WNT5A,WNT4,WNT10B,WNT7B,FZD5
8	KEGG	hsa04360	Axon guidance	2	176	1.45	0.0491	9606.ENSP00000264634,9606.ENSP00000290167	WNT5A,WNT4
8	Reactome	HSA-195721	Signaling by WNT	6	298	1.7	3.65e-07	9606.ENSP00000264634,9606.ENSP00000290167,9606.ENSP00000301061,9606.ENSP00000341032,9606.ENSP00000354607,9606.ENSP00000364860	WNT5A,WNT4,WNT10B,WNT7B,FZD5,ROR2
8	Reactome	HSA-3238698	WNT ligand biogenesis and trafficking	4	26	2.58	3.65e-07	9606.ENSP00000264634,9606.ENSP00000290167,9606.ENSP00000301061,9606.ENSP00000341032	WNT5A,WNT4,WNT10B,WNT7B
8	Reactome	HSA-373080	Class B/2 (Secretin family receptors)	5	94	2.12	3.65e-07	9606.ENSP00000264634,9606.ENSP00000290167,9606.ENSP00000301061,9606.ENSP00000341032,9606.ENSP00000354607	WNT5A,WNT4,WNT10B,WNT7B,FZD5
8	Reactome	HSA-5140745	WNT5A-dependent internalization of FZD2, FZD5 and ROR2	3	13	2.75	1.4e-05	9606.ENSP00000264634,9606.ENSP00000354607,9606.ENSP00000364860	WNT5A,FZD5,ROR2
8	Reactome	HSA-4086400	PCP/CE pathway	4	91	2.03	1.6e-05	9606.ENSP00000264634,9606.ENSP00000290167,9606.ENSP00000354607,9606.ENSP00000364860	WNT5A,WNT4,FZD5,ROR2
8	Reactome	HSA-3772470	Negative regulation of TCF-dependent signaling by WNT ligand antagonists	2	15	2.52	0.005	9606.ENSP00000264634,9606.ENSP00000290167	WNT5A,WNT4
8	Reactome	HSA-201681	TCF dependent signaling in response to WNT	3	201	1.57	0.0134	9606.ENSP00000264634,9606.ENSP00000290167,9606.ENSP00000354607	WNT5A,WNT4,FZD5
8	WikiPathways	WP4258	lncRNA in canonical Wnt signaling and colorectal cancer	6	93	2.2	1.78e-10	9606.ENSP00000264634,9606.ENSP00000290167,9606.ENSP00000301061,9606.ENSP00000341032,9606.ENSP00000354607,9606.ENSP00000364860	WNT5A,WNT4,WNT10B,WNT7B,FZD5,ROR2
8	WikiPathways	WP4336	ncRNAs involved in Wnt signaling in hepatocellular carcinoma	6	85	2.24	1.78e-10	9606.ENSP00000264634,9606.ENSP00000290167,9606.ENSP00000301061,9606.ENSP00000341032,9606.ENSP00000354607,9606.ENSP00000364860	WNT5A,WNT4,WNT10B,WNT7B,FZD5,ROR2
8	WikiPathways	WP4150	Wnt signaling in kidney disease	5	35	2.55	3.24e-10	9606.ENSP00000264634,9606.ENSP00000290167,9606.ENSP00000301061,9606.ENSP00000341032,9606.ENSP00000354607	WNT5A,WNT4,WNT10B,WNT7B,FZD5
8	WikiPathways	WP428	Wnt signaling	6	114	2.11	3.24e-10	9606.ENSP00000264634,9606.ENSP00000290167,9606.ENSP00000301061,9606.ENSP00000341032,9606.ENSP00000354607,9606.ENSP00000364860	WNT5A,WNT4,WNT10B,WNT7B,FZD5,ROR2
8	WikiPathways	WP399	Wnt signaling pathway and pluripotency	5	100	2.09	3.37e-08	9606.ENSP00000264634,9606.ENSP00000290167,9606.ENSP00000301061,9606.ENSP00000341032,9606.ENSP00000354607	WNT5A,WNT4,WNT10B,WNT7B,FZD5
8	WikiPathways	WP3931	Embryonic stem cell pluripotency pathways	5	116	2.03	5.77e-08	9606.ENSP00000264634,9606.ENSP00000290167,9606.ENSP00000301061,9606.ENSP00000341032,9606.ENSP00000354607	WNT5A,WNT4,WNT10B,WNT7B,FZD5
8	WikiPathways	WP4787	Osteoblast differentiation and related diseases	5	117	2.02	5.77e-08	9606.ENSP00000264634,9606.ENSP00000290167,9606.ENSP00000301061,9606.ENSP00000341032,9606.ENSP00000354607	WNT5A,WNT4,WNT10B,WNT7B,FZD5
8	WikiPathways	WP4262	Breast cancer pathway	5	154	1.9	1.72e-07	9606.ENSP00000264634,9606.ENSP00000290167,9606.ENSP00000301061,9606.ENSP00000341032,9606.ENSP00000354607	WNT5A,WNT4,WNT10B,WNT7B,FZD5
8	WikiPathways	WP4239	Epithelial to mesenchymal transition in colorectal cancer	5	160	1.89	1.84e-07	9606.ENSP00000264634,9606.ENSP00000290167,9606.ENSP00000301061,9606.ENSP00000341032,9606.ENSP00000354607	WNT5A,WNT4,WNT10B,WNT7B,FZD5
8	WikiPathways	WP5087	Malignant pleural mesothelioma	6	434	1.53	2.52e-07	9606.ENSP00000264634,9606.ENSP00000290167,9606.ENSP00000301061,9606.ENSP00000341032,9606.ENSP00000354607,9606.ENSP00000364860	WNT5A,WNT4,WNT10B,WNT7B,FZD5,ROR2
8	WikiPathways	WP2059	Alzheimers disease and miRNA effects	5	260	1.68	1.63e-06	9606.ENSP00000264634,9606.ENSP00000290167,9606.ENSP00000301061,9606.ENSP00000341032,9606.ENSP00000354607	WNT5A,WNT4,WNT10B,WNT7B,FZD5
8	WikiPathways	WP5124	Alzheimers disease	5	260	1.68	1.63e-06	9606.ENSP00000264634,9606.ENSP00000290167,9606.ENSP00000301061,9606.ENSP00000341032,9606.ENSP00000354607	WNT5A,WNT4,WNT10B,WNT7B,FZD5
8	WikiPathways	WP710	DNA damage response (only ATM dependent)	4	109	1.96	4.23e-06	9606.ENSP00000264634,9606.ENSP00000290167,9606.ENSP00000301061,9606.ENSP00000341032	WNT5A,WNT4,WNT10B,WNT7B
8	WikiPathways	WP2848	Pluripotent stem cell differentiation pathway	2	47	2.02	0.0094	9606.ENSP00000264634,9606.ENSP00000341032	WNT5A,WNT7B
8	WikiPathways	WP4879	Overlap between signal transduction pathways contributing to LMNA laminopathies	2	55	1.95	0.0118	9606.ENSP00000301061,9606.ENSP00000341032	WNT10B,WNT7B
8	WikiPathways	WP5236	Markers of kidney cell lineage	2	59	1.92	0.0127	9606.ENSP00000264634,9606.ENSP00000290167	WNT5A,WNT4
8	WikiPathways	WP5205	Clock-controlled autophagy in bone metabolism	2	80	1.79	0.0216	9606.ENSP00000264634,9606.ENSP00000301061	WNT5A,WNT10B
8	UniProt Keywords	KW-0879	Wnt signaling pathway	7	194	1.95	5.51e-11	9606.ENSP00000264634,9606.ENSP00000290167,9606.ENSP00000295113,9606.ENSP00000301061,9606.ENSP00000341032,9606.ENSP00000354607,9606.ENSP00000364860	WNT5A,WNT4,FRZB,WNT10B,WNT7B,FZD5,ROR2
8	UniProt Keywords	KW-0217	Developmental protein	7	971	1.25	1.87e-06	9606.ENSP00000264634,9606.ENSP00000290167,9606.ENSP00000295113,9606.ENSP00000301061,9606.ENSP00000341032,9606.ENSP00000354607,9606.ENSP00000364860	WNT5A,WNT4,FRZB,WNT10B,WNT7B,FZD5,ROR2
8	UniProt Keywords	KW-0272	Extracellular matrix	4	267	1.57	0.00053	9606.ENSP00000264634,9606.ENSP00000290167,9606.ENSP00000301061,9606.ENSP00000341032	WNT5A,WNT4,WNT10B,WNT7B
8	UniProt Keywords	KW-0325	Glycoprotein	8	4386	0.65	0.001	9606.ENSP00000264634,9606.ENSP00000290167,9606.ENSP00000295113,9606.ENSP00000301061,9606.ENSP00000341032,9606.ENSP00000354607,9606.ENSP00000362746,9606.ENSP00000364860	WNT5A,WNT4,FRZB,WNT10B,WNT7B,FZD5,GPR21,ROR2
8	UniProt Keywords	KW-0732	Signal	7	3277	0.72	0.0033	9606.ENSP00000264634,9606.ENSP00000290167,9606.ENSP00000295113,9606.ENSP00000301061,9606.ENSP00000341032,9606.ENSP00000354607,9606.ENSP00000364860	WNT5A,WNT4,FRZB,WNT10B,WNT7B,FZD5,ROR2
8	UniProt Keywords	KW-1015	Disulfide bond	7	3338	0.71	0.0033	9606.ENSP00000264634,9606.ENSP00000290167,9606.ENSP00000295113,9606.ENSP00000301061,9606.ENSP00000341032,9606.ENSP00000354607,9606.ENSP00000364860	WNT5A,WNT4,FRZB,WNT10B,WNT7B,FZD5,ROR2
8	UniProt Keywords	KW-0449	Lipoprotein	4	818	1.08	0.0177	9606.ENSP00000264634,9606.ENSP00000290167,9606.ENSP00000301061,9606.ENSP00000341032	WNT5A,WNT4,WNT10B,WNT7B
8	UniProt Keywords	KW-0964	Secreted	5	1839	0.83	0.0264	9606.ENSP00000264634,9606.ENSP00000290167,9606.ENSP00000295113,9606.ENSP00000301061,9606.ENSP00000341032	WNT5A,WNT4,FRZB,WNT10B,WNT7B
9	GO Process	GO:0006897	Endocytosis	5	447	1.5	0.002	9606.ENSP00000320543,9606.ENSP00000360798,9606.ENSP00000363458,9606.ENSP00000454071,9606.ENSP00000473001	EPN2,EPS15,LDLRAP1,LDLR,FCHO1
9	GO Process	GO:0006898	Receptor-mediated endocytosis	4	166	1.83	0.002	9606.ENSP00000360798,9606.ENSP00000363458,9606.ENSP00000454071,9606.ENSP00000473001	EPS15,LDLRAP1,LDLR,FCHO1
9	GO Process	GO:0016192	Vesicle-mediated transport	6	1298	1.11	0.0029	9606.ENSP00000320543,9606.ENSP00000357307,9606.ENSP00000360798,9606.ENSP00000363458,9606.ENSP00000454071,9606.ENSP00000473001	EPN2,SYT11,EPS15,LDLRAP1,LDLR,FCHO1
9	GO Process	GO:0090118	Receptor-mediated endocytosis involved in cholesterol transport	2	3	3.27	0.0042	9606.ENSP00000363458,9606.ENSP00000454071	LDLRAP1,LDLR
9	GO Process	GO:1903979	Negative regulation of microglial cell activation	2	8	2.85	0.0152	9606.ENSP00000357307,9606.ENSP00000454071	SYT11,LDLR
9	GO Process	GO:0010988	Regulation of low-density lipoprotein particle clearance	2	15	2.57	0.0338	9606.ENSP00000363458,9606.ENSP00000454071	LDLRAP1,LDLR
9	GO Process	GO:0034383	Low-density lipoprotein particle clearance	2	14	2.6	0.0338	9606.ENSP00000363458,9606.ENSP00000454071	LDLRAP1,LDLR
9	GO Process	GO:0048268	Clathrin coat assembly	2	16	2.55	0.0338	9606.ENSP00000360798,9606.ENSP00000473001	EPS15,FCHO1
9	GO Process	GO:0030100	Regulation of endocytosis	3	209	1.61	0.0408	9606.ENSP00000334836,9606.ENSP00000357307,9606.ENSP00000363458	BMP2K,SYT11,LDLRAP1
9	GO Function	GO:0030276	Clathrin binding	4	69	2.21	2.97e-05	9606.ENSP00000320543,9606.ENSP00000357307,9606.ENSP00000363458,9606.ENSP00000454071	EPN2,SYT11,LDLRAP1,LDLR
9	GO Function	GO:0035612	AP-2 adaptor complex binding	3	9	2.97	2.97e-05	9606.ENSP00000334836,9606.ENSP00000363458,9606.ENSP00000473001	BMP2K,LDLRAP1,FCHO1
9	GO Component	GO:0030665	Clathrin-coated vesicle membrane	4	130	1.94	0.00014	9606.ENSP00000320543,9606.ENSP00000357307,9606.ENSP00000363458,9606.ENSP00000454071	EPN2,SYT11,LDLRAP1,LDLR
9	GO Component	GO:0005905	Clathrin-coated pit	3	71	2.08	0.00086	9606.ENSP00000360798,9606.ENSP00000454071,9606.ENSP00000473001	EPS15,LDLR,FCHO1
9	GO Component	GO:0030669	Clathrin-coated endocytic vesicle membrane	3	70	2.08	0.00086	9606.ENSP00000320543,9606.ENSP00000363458,9606.ENSP00000454071	EPN2,LDLRAP1,LDLR
9	GO Component	GO:0030139	Endocytic vesicle	4	338	1.52	0.00088	9606.ENSP00000320543,9606.ENSP00000357307,9606.ENSP00000363458,9606.ENSP00000454071	EPN2,SYT11,LDLRAP1,LDLR
9	GO Component	GO:0005768	Endosome	5	1030	1.14	0.0017	9606.ENSP00000320543,9606.ENSP00000357307,9606.ENSP00000360798,9606.ENSP00000363458,9606.ENSP00000454071	EPN2,SYT11,EPS15,LDLRAP1,LDLR
9	GO Component	GO:0030659	Cytoplasmic vesicle membrane	5	1190	1.07	0.0032	9606.ENSP00000320543,9606.ENSP00000357307,9606.ENSP00000360798,9606.ENSP00000363458,9606.ENSP00000454071	EPN2,SYT11,EPS15,LDLRAP1,LDLR
9	GO Component	GO:0098590	Plasma membrane region	5	1237	1.06	0.0032	9606.ENSP00000357307,9606.ENSP00000360798,9606.ENSP00000363458,9606.ENSP00000454071,9606.ENSP00000473001	SYT11,EPS15,LDLRAP1,LDLR,FCHO1
9	GO Component	GO:0030118	Clathrin coat	2	44	2.11	0.0162	9606.ENSP00000320543,9606.ENSP00000360798	EPN2,EPS15
9	GO Component	GO:0098588	Bounding membrane of organelle	5	2125	0.82	0.0349	9606.ENSP00000320543,9606.ENSP00000357307,9606.ENSP00000360798,9606.ENSP00000363458,9606.ENSP00000454071	EPN2,SYT11,EPS15,LDLRAP1,LDLR
9	GO Component	GO:0005769	Early endosome	3	411	1.31	0.0387	9606.ENSP00000360798,9606.ENSP00000363458,9606.ENSP00000454071	EPS15,LDLRAP1,LDLR
9	KEGG	hsa04144	Endocytosis	4	241	1.67	0.00027	9606.ENSP00000320543,9606.ENSP00000360798,9606.ENSP00000363458,9606.ENSP00000454071	EPN2,EPS15,LDLRAP1,LDLR
9	KEGG	hsa04979	Cholesterol metabolism	2	48	2.07	0.0221	9606.ENSP00000363458,9606.ENSP00000454071	LDLRAP1,LDLR
9	Reactome	HSA-8856825	Cargo recognition for clathrin-mediated endocytosis	6	105	2.21	4.43e-10	9606.ENSP00000320543,9606.ENSP00000357307,9606.ENSP00000360798,9606.ENSP00000363458,9606.ENSP00000454071,9606.ENSP00000473001	EPN2,SYT11,EPS15,LDLRAP1,LDLR,FCHO1
9	Reactome	HSA-8964026	Chylomicron clearance	2	5	3.05	0.001	9606.ENSP00000363458,9606.ENSP00000454071	LDLRAP1,LDLR
9	Reactome	HSA-8964038	LDL clearance	2	19	2.47	0.0086	9606.ENSP00000363458,9606.ENSP00000454071	LDLRAP1,LDLR
9	WikiPathways	WP5323	Fatty Acids and Lipoproteins Transport in Hepatocytes	5	380	1.57	4.41e-05	9606.ENSP00000320543,9606.ENSP00000360798,9606.ENSP00000363458,9606.ENSP00000454071,9606.ENSP00000473001	EPN2,EPS15,LDLRAP1,LDLR,FCHO1
9	WikiPathways	WP4522	Metabolic pathway of LDL, HDL and TG, including diseases	2	17	2.52	0.0064	9606.ENSP00000363458,9606.ENSP00000454071	LDLRAP1,LDLR
9	WikiPathways	WP5109	Familial hyperlipidemia type 2	2	16	2.55	0.0064	9606.ENSP00000363458,9606.ENSP00000454071	LDLRAP1,LDLR
9	UniProt Keywords	KW-0254	Endocytosis	5	128	2.04	1.81e-07	9606.ENSP00000320543,9606.ENSP00000360798,9606.ENSP00000363458,9606.ENSP00000454071,9606.ENSP00000473001	EPN2,EPS15,LDLRAP1,LDLR,FCHO1
9	UniProt Keywords	KW-0168	Coated pit	3	51	2.22	0.00023	9606.ENSP00000360798,9606.ENSP00000454071,9606.ENSP00000473001	EPS15,LDLR,FCHO1
10	GO Function	GO:0005243	Gap junction channel activity	4	22	2.71	4.1e-07	9606.ENSP00000325775,9606.ENSP00000354900,9606.ENSP00000355675,9606.ENSP00000484552	GJC3,GJB1,GJC2,GJA5
10	GO Function	GO:1903763	Gap junction channel activity involved in cell communication by electrical coupling	2	6	2.97	0.005	9606.ENSP00000355675,9606.ENSP00000484552	GJC2,GJA5
10	GO Component	GO:0005922	Connexin complex	4	22	2.71	1.7e-07	9606.ENSP00000325775,9606.ENSP00000354900,9606.ENSP00000355675,9606.ENSP00000484552	GJC3,GJB1,GJC2,GJA5
10	GO Component	GO:0005911	Cell-cell junction	5	499	1.45	0.00015	9606.ENSP00000325775,9606.ENSP00000354900,9606.ENSP00000355675,9606.ENSP00000404854,9606.ENSP00000484552	GJC3,GJB1,GJC2,NDRG1,GJA5
10	GO Component	GO:0043209	Myelin sheath	2	45	2.1	0.0396	9606.ENSP00000325775,9606.ENSP00000355675	GJC3,GJC2
10	GO Component	GO:0005886	Plasma membrane	7	5544	0.55	0.041	9606.ENSP00000325775,9606.ENSP00000354900,9606.ENSP00000355675,9606.ENSP00000404854,9606.ENSP00000423660,9606.ENSP00000459533,9606.ENSP00000484552	GJC3,GJB1,GJC2,NDRG1,SH3TC2,LITAF,GJA5
10	Reactome	HSA-190861	Gap junction assembly	3	37	2.36	0.00062	9606.ENSP00000354900,9606.ENSP00000355675,9606.ENSP00000484552	GJB1,GJC2,GJA5
10	WikiPathways	WP4856	Intracellular trafficking proteins involved in CMT neuropathy	3	26	2.51	7.8e-05	9606.ENSP00000404854,9606.ENSP00000423660,9606.ENSP00000459533	NDRG1,SH3TC2,LITAF
10	WikiPathways	WP536	Calcium regulation in cardiac cells	3	151	1.75	0.0063	9606.ENSP00000354900,9606.ENSP00000355675,9606.ENSP00000484552	GJB1,GJC2,GJA5
10	UniProt Keywords	KW-0303	Gap junction	4	27	2.62	1.17e-07	9606.ENSP00000325775,9606.ENSP00000354900,9606.ENSP00000355675,9606.ENSP00000484552	GJC3,GJB1,GJC2,GJA5
10	UniProt Keywords	KW-0144	Charcot-Marie-Tooth disease	4	55	2.31	8.46e-07	9606.ENSP00000354900,9606.ENSP00000404854,9606.ENSP00000423660,9606.ENSP00000459533	GJB1,NDRG1,SH3TC2,LITAF
10	UniProt Keywords	KW-0523	Neurodegeneration	5	349	1.61	7.65e-06	9606.ENSP00000354900,9606.ENSP00000355675,9606.ENSP00000404854,9606.ENSP00000423660,9606.ENSP00000459533	GJB1,GJC2,NDRG1,SH3TC2,LITAF
10	UniProt Keywords	KW-1003	Cell membrane	6	3277	0.71	0.0143	9606.ENSP00000325775,9606.ENSP00000354900,9606.ENSP00000355675,9606.ENSP00000404854,9606.ENSP00000459533,9606.ENSP00000484552	GJC3,GJB1,GJC2,NDRG1,LITAF,GJA5

## Sheet: M4.module
Cluster	category	term ID	term description	observed gene count	background gene count	strength	false discovery rate	matching proteins in your network (IDs)	matching proteins in your network (labels)
1	GO Process	GO:0008366	Axon ensheathment	11	116	1.95	2.66e-15	9606.ENSP00000064724,9606.ENSP00000219207,9606.ENSP00000219368,9606.ENSP00000278836,9606.ENSP00000310880,9606.ENSP00000330633,9606.ENSP00000357581,9606.ENSP00000376048,9606.ENSP00000379290,9606.ENSP00000380958,9606.ENSP00000481006	CLDN11,PLLP,FA2H,MYRF,MAL,CNTN2,NKX6-2,MAG,BCAS1,MBP,PLP1
1	GO Process	GO:0042552	Myelination	10	114	1.92	1.16e-13	9606.ENSP00000219207,9606.ENSP00000219368,9606.ENSP00000278836,9606.ENSP00000310880,9606.ENSP00000330633,9606.ENSP00000357581,9606.ENSP00000376048,9606.ENSP00000379290,9606.ENSP00000380958,9606.ENSP00000481006	PLLP,FA2H,MYRF,MAL,CNTN2,NKX6-2,MAG,BCAS1,MBP,PLP1
1	GO Process	GO:0022010	Central nervous system myelination	7	23	2.46	3.98e-12	9606.ENSP00000219368,9606.ENSP00000278836,9606.ENSP00000310880,9606.ENSP00000330633,9606.ENSP00000357581,9606.ENSP00000376048,9606.ENSP00000481006	FA2H,MYRF,MAL,CNTN2,NKX6-2,MAG,PLP1
1	GO Process	GO:0048709	Oligodendrocyte differentiation	8	79	1.98	5.24e-11	9606.ENSP00000219368,9606.ENSP00000278836,9606.ENSP00000310880,9606.ENSP00000330633,9606.ENSP00000357581,9606.ENSP00000376048,9606.ENSP00000377470,9606.ENSP00000481006	FA2H,MYRF,MAL,CNTN2,NKX6-2,MAG,CNP,PLP1
1	GO Process	GO:0007399	Nervous system development	16	2188	0.84	1.3e-08	9606.ENSP00000064724,9606.ENSP00000219207,9606.ENSP00000219368,9606.ENSP00000278836,9606.ENSP00000306449,9606.ENSP00000310880,9606.ENSP00000312293,9606.ENSP00000330633,9606.ENSP00000355675,9606.ENSP00000357581,9606.ENSP00000366091,9606.ENSP00000376048,9606.ENSP00000377470,9606.ENSP00000379290,9606.ENSP00000380958,9606.ENSP00000481006	CLDN11,PLLP,FA2H,MYRF,GPR37,MAL,MOBP,CNTN2,GJC2,NKX6-2,MOG,MAG,CNP,BCAS1,MBP,PLP1
1	GO Process	GO:0007417	Central nervous system development	11	1035	1	2.51e-06	9606.ENSP00000219368,9606.ENSP00000278836,9606.ENSP00000310880,9606.ENSP00000330633,9606.ENSP00000355675,9606.ENSP00000357581,9606.ENSP00000366091,9606.ENSP00000376048,9606.ENSP00000377470,9606.ENSP00000380958,9606.ENSP00000481006	FA2H,MYRF,MAL,CNTN2,GJC2,NKX6-2,MOG,MAG,CNP,MBP,PLP1
1	GO Process	GO:0048731	System development	17	3867	0.62	3.13e-06	9606.ENSP00000064724,9606.ENSP00000219207,9606.ENSP00000219368,9606.ENSP00000278836,9606.ENSP00000306449,9606.ENSP00000310880,9606.ENSP00000312293,9606.ENSP00000330633,9606.ENSP00000355675,9606.ENSP00000357581,9606.ENSP00000366091,9606.ENSP00000376048,9606.ENSP00000377470,9606.ENSP00000379290,9606.ENSP00000380958,9606.ENSP00000463245,9606.ENSP00000481006	CLDN11,PLLP,FA2H,MYRF,GPR37,MAL,MOBP,CNTN2,GJC2,NKX6-2,MOG,MAG,CNP,BCAS1,MBP,TMEM98,PLP1
1	GO Process	GO:0045685	Regulation of glial cell differentiation	5	74	1.8	1.77e-05	9606.ENSP00000330633,9606.ENSP00000357581,9606.ENSP00000360214,9606.ENSP00000376048,9606.ENSP00000463245	CNTN2,NKX6-2,OPALIN,MAG,TMEM98
1	GO Process	GO:0048856	Anatomical structure development	18	5117	0.52	1.77e-05	9606.ENSP00000064724,9606.ENSP00000219207,9606.ENSP00000219368,9606.ENSP00000278836,9606.ENSP00000306449,9606.ENSP00000310880,9606.ENSP00000312293,9606.ENSP00000330633,9606.ENSP00000355675,9606.ENSP00000357581,9606.ENSP00000366091,9606.ENSP00000376048,9606.ENSP00000377470,9606.ENSP00000379290,9606.ENSP00000380453,9606.ENSP00000380958,9606.ENSP00000463245,9606.ENSP00000481006	CLDN11,PLLP,FA2H,MYRF,GPR37,MAL,MOBP,CNTN2,GJC2,NKX6-2,MOG,MAG,CNP,BCAS1,ERMN,MBP,TMEM98,PLP1
1	GO Process	GO:0021762	Substantia nigra development	4	47	1.9	0.0002	9606.ENSP00000376048,9606.ENSP00000377470,9606.ENSP00000380958,9606.ENSP00000481006	MAG,CNP,MBP,PLP1
1	GO Process	GO:0031641	Regulation of myelination	4	48	1.89	0.00021	9606.ENSP00000278836,9606.ENSP00000357581,9606.ENSP00000376048,9606.ENSP00000463245	MYRF,NKX6-2,MAG,TMEM98
1	GO Process	GO:0032501	Multicellular organismal process	18	6490	0.42	0.00072	9606.ENSP00000064724,9606.ENSP00000219207,9606.ENSP00000219368,9606.ENSP00000278836,9606.ENSP00000306449,9606.ENSP00000310880,9606.ENSP00000312293,9606.ENSP00000330633,9606.ENSP00000355675,9606.ENSP00000357581,9606.ENSP00000366091,9606.ENSP00000376048,9606.ENSP00000377470,9606.ENSP00000379290,9606.ENSP00000380453,9606.ENSP00000380958,9606.ENSP00000463245,9606.ENSP00000481006	CLDN11,PLLP,FA2H,MYRF,GPR37,MAL,MOBP,CNTN2,GJC2,NKX6-2,MOG,MAG,CNP,BCAS1,ERMN,MBP,TMEM98,PLP1
1	GO Process	GO:0022008	Neurogenesis	9	1290	0.82	0.0022	9606.ENSP00000219368,9606.ENSP00000278836,9606.ENSP00000306449,9606.ENSP00000310880,9606.ENSP00000330633,9606.ENSP00000357581,9606.ENSP00000376048,9606.ENSP00000377470,9606.ENSP00000481006	FA2H,MYRF,GPR37,MAL,CNTN2,NKX6-2,MAG,CNP,PLP1
1	GO Process	GO:0014013	Regulation of gliogenesis	4	101	1.57	0.0028	9606.ENSP00000355675,9606.ENSP00000357581,9606.ENSP00000376048,9606.ENSP00000463245	GJC2,NKX6-2,MAG,TMEM98
1	GO Process	GO:0051960	Regulation of nervous system development	6	447	1.1	0.0036	9606.ENSP00000278836,9606.ENSP00000355675,9606.ENSP00000357581,9606.ENSP00000376048,9606.ENSP00000380958,9606.ENSP00000463245	MYRF,GJC2,NKX6-2,MAG,MBP,TMEM98
1	GO Process	GO:0032286	Central nervous system myelin maintenance	2	4	2.67	0.0097	9606.ENSP00000219368,9606.ENSP00000278836	FA2H,MYRF
1	GO Process	GO:0048713	Regulation of oligodendrocyte differentiation	3	44	1.81	0.0097	9606.ENSP00000357581,9606.ENSP00000360214,9606.ENSP00000463245	NKX6-2,OPALIN,TMEM98
1	GO Process	GO:0050768	Negative regulation of neurogenesis	4	143	1.42	0.0097	9606.ENSP00000357581,9606.ENSP00000376048,9606.ENSP00000380958,9606.ENSP00000463245	NKX6-2,MAG,MBP,TMEM98
1	GO Process	GO:0048468	Cell development	9	1719	0.69	0.0173	9606.ENSP00000219368,9606.ENSP00000278836,9606.ENSP00000306449,9606.ENSP00000310880,9606.ENSP00000330633,9606.ENSP00000357581,9606.ENSP00000376048,9606.ENSP00000377470,9606.ENSP00000481006	FA2H,MYRF,GPR37,MAL,CNTN2,NKX6-2,MAG,CNP,PLP1
1	GO Process	GO:0050767	Regulation of neurogenesis	5	368	1.11	0.0189	9606.ENSP00000355675,9606.ENSP00000357581,9606.ENSP00000376048,9606.ENSP00000380958,9606.ENSP00000463245	GJC2,NKX6-2,MAG,MBP,TMEM98
1	GO Process	GO:0014015	Positive regulation of gliogenesis	3	66	1.63	0.0248	9606.ENSP00000355675,9606.ENSP00000357581,9606.ENSP00000376048	GJC2,NKX6-2,MAG
1	GO Process	GO:0099612	Protein localization to axon	2	9	2.32	0.0272	9606.ENSP00000310880,9606.ENSP00000330633	MAL,CNTN2
1	GO Function	GO:0019911	Structural constituent of myelin sheath	4	9	2.62	3.33e-06	9606.ENSP00000219207,9606.ENSP00000310880,9606.ENSP00000380958,9606.ENSP00000481006	PLLP,MAL,MBP,PLP1
1	GO Component	GO:0043209	Myelin sheath	8	45	2.22	6.35e-13	9606.ENSP00000219207,9606.ENSP00000330633,9606.ENSP00000355675,9606.ENSP00000376048,9606.ENSP00000377470,9606.ENSP00000380453,9606.ENSP00000380958,9606.ENSP00000481006	PLLP,CNTN2,GJC2,MAG,CNP,ERMN,MBP,PLP1
1	GO Component	GO:0044304	Main axon	5	63	1.87	8.38e-06	9606.ENSP00000330633,9606.ENSP00000355675,9606.ENSP00000376048,9606.ENSP00000380453,9606.ENSP00000380958	CNTN2,GJC2,MAG,ERMN,MBP
1	GO Component	GO:0033270	Paranode region of axon	3	11	2.41	0.00026	9606.ENSP00000355675,9606.ENSP00000376048,9606.ENSP00000380453	GJC2,MAG,ERMN
1	GO Component	GO:0043218	Compact myelin	3	13	2.34	0.0003	9606.ENSP00000219207,9606.ENSP00000376048,9606.ENSP00000380958	PLLP,MAG,MBP
1	GO Component	GO:0033269	Internode region of axon	2	4	2.67	0.0066	9606.ENSP00000380453,9606.ENSP00000380958	ERMN,MBP
1	GO Component	GO:0035749	Myelin sheath adaxonal region	2	6	2.5	0.0103	9606.ENSP00000376048,9606.ENSP00000377470	MAG,CNP
1	GO Component	GO:0030424	Axon	6	651	0.94	0.0138	9606.ENSP00000064724,9606.ENSP00000330633,9606.ENSP00000355675,9606.ENSP00000376048,9606.ENSP00000380453,9606.ENSP00000380958	CLDN11,CNTN2,GJC2,MAG,ERMN,MBP
1	GO Component	GO:0071944	Cell periphery	15	6015	0.37	0.035	9606.ENSP00000064724,9606.ENSP00000306449,9606.ENSP00000310880,9606.ENSP00000312293,9606.ENSP00000319250,9606.ENSP00000330633,9606.ENSP00000355675,9606.ENSP00000360214,9606.ENSP00000366091,9606.ENSP00000376048,9606.ENSP00000377470,9606.ENSP00000380453,9606.ENSP00000380958,9606.ENSP00000463245,9606.ENSP00000481006	CLDN11,GPR37,MAL,MOBP,GPR62,CNTN2,GJC2,OPALIN,MOG,MAG,CNP,ERMN,MBP,TMEM98,PLP1
1	WikiPathways	WP2276	Glial cell differentiation	4	7	2.73	2.04e-07	9606.ENSP00000376048,9606.ENSP00000377470,9606.ENSP00000380958,9606.ENSP00000481006	MAG,CNP,MBP,PLP1
1	WikiPathways	WP4304	Oligodendrocyte specification and differentiation, leading to myelin components for CNS	5	30	2.19	2.04e-07	9606.ENSP00000366091,9606.ENSP00000376048,9606.ENSP00000377470,9606.ENSP00000380958,9606.ENSP00000481006	MOG,MAG,CNP,MBP,PLP1
1	WikiPathways	WP3584	MECP2 and associated Rett syndrome	3	72	1.59	0.0174	9606.ENSP00000376048,9606.ENSP00000377470,9606.ENSP00000380958	MAG,CNP,MBP
1	UniProt Keywords	KW-1026	Leukodystrophy	4	35	2.03	5.13e-05	9606.ENSP00000219368,9606.ENSP00000355675,9606.ENSP00000357581,9606.ENSP00000481006	FA2H,GJC2,NKX6-2,PLP1
1	UniProt Keywords	KW-0890	Hereditary spastic paraplegia	4	58	1.81	0.00017	9606.ENSP00000219368,9606.ENSP00000355675,9606.ENSP00000376048,9606.ENSP00000481006	FA2H,GJC2,MAG,PLP1
1	UniProt Keywords	KW-0523	Neurodegeneration	5	349	1.13	0.0065	9606.ENSP00000219368,9606.ENSP00000355675,9606.ENSP00000357581,9606.ENSP00000376048,9606.ENSP00000481006	FA2H,GJC2,NKX6-2,MAG,PLP1
1	UniProt Keywords	KW-0472	Membrane	16	7068	0.33	0.0313	9606.ENSP00000064724,9606.ENSP00000219207,9606.ENSP00000219368,9606.ENSP00000278836,9606.ENSP00000306449,9606.ENSP00000310880,9606.ENSP00000319250,9606.ENSP00000330633,9606.ENSP00000355675,9606.ENSP00000360214,9606.ENSP00000366091,9606.ENSP00000376048,9606.ENSP00000377470,9606.ENSP00000380958,9606.ENSP00000463245,9606.ENSP00000481006	CLDN11,PLLP,FA2H,MYRF,GPR37,MAL,GPR62,CNTN2,GJC2,OPALIN,MOG,MAG,CNP,MBP,TMEM98,PLP1
1	UniProt Keywords	KW-1003	Cell membrane	11	3277	0.5	0.0313	9606.ENSP00000064724,9606.ENSP00000306449,9606.ENSP00000319250,9606.ENSP00000330633,9606.ENSP00000355675,9606.ENSP00000360214,9606.ENSP00000366091,9606.ENSP00000376048,9606.ENSP00000380958,9606.ENSP00000463245,9606.ENSP00000481006	CLDN11,GPR37,GPR62,CNTN2,GJC2,OPALIN,MOG,MAG,MBP,TMEM98,PLP1
2	GO Function	GO:0001540	Amyloid-beta binding	4	84	2.07	0.00013	9606.ENSP00000257626,9606.ENSP00000264381,9606.ENSP00000265381,9606.ENSP00000427211	GSAP,BCHE,APBA1,APBB2
2	GO Component	GO:0045202	Synapse	6	1350	1.04	0.0053	9606.ENSP00000265381,9606.ENSP00000326366,9606.ENSP00000342793,9606.ENSP00000358105,9606.ENSP00000374409,9606.ENSP00000427211	APBA1,PSEN1,PLD1,APH1A,PKP4,APBB2
2	GO Component	GO:0070765	Gamma-secretase complex	2	7	2.85	0.0053	9606.ENSP00000326366,9606.ENSP00000358105	PSEN1,APH1A
2	GO Component	GO:0005794	Golgi apparatus	6	1650	0.95	0.0057	9606.ENSP00000257626,9606.ENSP00000265381,9606.ENSP00000326366,9606.ENSP00000342793,9606.ENSP00000358105,9606.ENSP00000427211	GSAP,APBA1,PSEN1,PLD1,APH1A,APBB2
2	GO Component	GO:0042734	Presynaptic membrane	3	146	1.7	0.0118	9606.ENSP00000265381,9606.ENSP00000326366,9606.ENSP00000358105	APBA1,PSEN1,APH1A
2	GO Component	GO:0008021	Synaptic vesicle	3	212	1.54	0.0235	9606.ENSP00000265381,9606.ENSP00000326366,9606.ENSP00000358105	APBA1,PSEN1,APH1A
2	GO Component	GO:0048471	Perinuclear region of cytoplasm	4	727	1.13	0.0298	9606.ENSP00000265381,9606.ENSP00000326366,9606.ENSP00000342793,9606.ENSP00000374409	APBA1,PSEN1,PLD1,PKP4
2	Reactome	HSA-193692	Regulated proteolysis of p75NTR	2	11	2.65	0.0148	9606.ENSP00000326366,9606.ENSP00000358105	PSEN1,APH1A
2	Reactome	HSA-205043	NRIF signals cell death from the nucleus	2	16	2.49	0.0148	9606.ENSP00000326366,9606.ENSP00000358105	PSEN1,APH1A
2	Reactome	HSA-9013700	NOTCH4 Activation and Transmission of Signal to the Nucleus	2	11	2.65	0.0148	9606.ENSP00000326366,9606.ENSP00000358105	PSEN1,APH1A
2	Reactome	HSA-9017802	Noncanonical activation of NOTCH3	2	8	2.79	0.0148	9606.ENSP00000326366,9606.ENSP00000358105	PSEN1,APH1A
2	Reactome	HSA-2979096	NOTCH2 Activation and Transmission of Signal to the Nucleus	2	22	2.35	0.0181	9606.ENSP00000326366,9606.ENSP00000358105	PSEN1,APH1A
2	Reactome	HSA-1251985	Nuclear signaling by ERBB4	2	32	2.19	0.0247	9606.ENSP00000326366,9606.ENSP00000358105	PSEN1,APH1A
2	Reactome	HSA-2122948	Activated NOTCH1 Transmits Signal to the Nucleus	2	31	2.2	0.0247	9606.ENSP00000326366,9606.ENSP00000358105	PSEN1,APH1A
2	Reactome	HSA-3928665	EPH-ephrin mediated repulsion of cells	2	51	1.98	0.0416	9606.ENSP00000326366,9606.ENSP00000358105	PSEN1,APH1A
2	Reactome	HSA-2644606	Constitutive Signaling by NOTCH1 PEST Domain Mutants	2	58	1.93	0.048	9606.ENSP00000326366,9606.ENSP00000358105	PSEN1,APH1A
2	Reactome	HSA-2894862	Constitutive Signaling by NOTCH1 HD+PEST Domain Mutants	2	58	1.93	0.048	9606.ENSP00000326366,9606.ENSP00000358105	PSEN1,APH1A
2	UniProt Keywords	KW-0333	Golgi apparatus	5	879	1.15	0.006	9606.ENSP00000257626,9606.ENSP00000265381,9606.ENSP00000326366,9606.ENSP00000342793,9606.ENSP00000358105	GSAP,APBA1,PSEN1,PLD1,APH1A
3	GO Process	GO:0001525	Angiogenesis	4	325	1.54	0.0381	9606.ENSP00000223095,9606.ENSP00000263923,9606.ENSP00000362299,9606.ENSP00000391800	SERPINE1,KDR,ENG,APLN
3	GO Process	GO:0042127	Regulation of cell population proliferation	6	1669	1.01	0.0381	9606.ENSP00000263923,9606.ENSP00000267101,9606.ENSP00000295666,9606.ENSP00000329668,9606.ENSP00000362299,9606.ENSP00000391800	KDR,ERBB3,IGFBP7,SHC4,ENG,APLN
3	GO Process	GO:0072359	Circulatory system development	5	901	1.19	0.0381	9606.ENSP00000223095,9606.ENSP00000263923,9606.ENSP00000267101,9606.ENSP00000362299,9606.ENSP00000391800	SERPINE1,KDR,ERBB3,ENG,APLN
3	GO Process	GO:0001936	Regulation of endothelial cell proliferation	3	138	1.79	0.0385	9606.ENSP00000263923,9606.ENSP00000362299,9606.ENSP00000391800	KDR,ENG,APLN
3	GO Process	GO:0007507	Heart development	4	548	1.31	0.0391	9606.ENSP00000263923,9606.ENSP00000267101,9606.ENSP00000362299,9606.ENSP00000391800	KDR,ERBB3,ENG,APLN
3	GO Process	GO:0045766	Positive regulation of angiogenesis	3	166	1.71	0.0391	9606.ENSP00000223095,9606.ENSP00000263923,9606.ENSP00000362299	SERPINE1,KDR,ENG
3	GO Function	GO:0019838	Growth factor binding	4	127	1.95	0.00032	9606.ENSP00000263923,9606.ENSP00000267101,9606.ENSP00000295666,9606.ENSP00000362299	KDR,ERBB3,IGFBP7,ENG
3	GO Function	GO:0005102	Signaling receptor binding	6	1499	1.05	0.0032	9606.ENSP00000223095,9606.ENSP00000263923,9606.ENSP00000267101,9606.ENSP00000329668,9606.ENSP00000362299,9606.ENSP00000391800	SERPINE1,KDR,ERBB3,SHC4,ENG,APLN
3	GO Function	GO:0019199	Transmembrane receptor protein kinase activity	3	81	2.02	0.0042	9606.ENSP00000263923,9606.ENSP00000267101,9606.ENSP00000362299	KDR,ERBB3,ENG
3	KEGG	hsa01521	EGFR tyrosine kinase inhibitor resistance	3	77	2.04	0.00075	9606.ENSP00000263923,9606.ENSP00000267101,9606.ENSP00000329668	KDR,ERBB3,SHC4
3	WikiPathways	WP4806	EGFR tyrosine kinase inhibitor resistance	3	83	2.01	0.0022	9606.ENSP00000263923,9606.ENSP00000267101,9606.ENSP00000329668	KDR,ERBB3,SHC4
3	WikiPathways	WP3668	Hypothesized pathways in pathogenesis of cardiovascular disease	2	25	2.35	0.0148	9606.ENSP00000223095,9606.ENSP00000362299	SERPINE1,ENG
3	WikiPathways	WP4816	TGF-beta receptor signaling in skeletal dysplasias	2	58	1.99	0.043	9606.ENSP00000223095,9606.ENSP00000362299	SERPINE1,ENG
3	WikiPathways	WP560	TGF-beta receptor signaling	2	54	2.02	0.043	9606.ENSP00000223095,9606.ENSP00000362299	SERPINE1,ENG
3	UniProt Keywords	KW-0037	Angiogenesis	3	131	1.81	0.0071	9606.ENSP00000263923,9606.ENSP00000362299,9606.ENSP00000391800	KDR,ENG,APLN
3	UniProt Keywords	KW-0732	Signal	6	3277	0.71	0.0429	9606.ENSP00000223095,9606.ENSP00000263923,9606.ENSP00000267101,9606.ENSP00000295666,9606.ENSP00000362299,9606.ENSP00000391800	SERPINE1,KDR,ERBB3,IGFBP7,ENG,APLN
3	UniProt Keywords	KW-0964	Secreted	5	1839	0.88	0.0429	9606.ENSP00000223095,9606.ENSP00000263923,9606.ENSP00000267101,9606.ENSP00000295666,9606.ENSP00000391800	SERPINE1,KDR,ERBB3,IGFBP7,APLN
4	GO Process	GO:0006281	DNA repair	5	497	1.52	0.00097	9606.ENSP00000231790,9606.ENSP00000295050,9606.ENSP00000310520,9606.ENSP00000348020,9606.ENSP00000416739	MLH1,SPRTN,ERCC4,MLH3,RECQL
4	GO Process	GO:0006310	DNA recombination	4	235	1.75	0.0024	9606.ENSP00000231790,9606.ENSP00000310520,9606.ENSP00000348020,9606.ENSP00000416739	MLH1,ERCC4,MLH3,RECQL
4	GO Process	GO:0007131	Reciprocal meiotic recombination	3	56	2.25	0.0024	9606.ENSP00000231790,9606.ENSP00000310520,9606.ENSP00000348020	MLH1,ERCC4,MLH3
4	GO Process	GO:0045132	Meiotic chromosome segregation	3	98	2	0.0051	9606.ENSP00000231790,9606.ENSP00000310520,9606.ENSP00000348020	MLH1,ERCC4,MLH3
4	GO Process	GO:0000712	Resolution of meiotic recombination intermediates	2	18	2.56	0.0191	9606.ENSP00000231790,9606.ENSP00000310520	MLH1,ERCC4
4	GO Process	GO:0006302	Double-strand break repair	3	204	1.68	0.0222	9606.ENSP00000231790,9606.ENSP00000310520,9606.ENSP00000416739	MLH1,ERCC4,RECQL
4	GO Process	GO:0006298	Mismatch repair	2	30	2.34	0.0315	9606.ENSP00000231790,9606.ENSP00000348020	MLH1,MLH3
4	GO Process	GO:0007143	Female meiotic nuclear division	2	34	2.29	0.0362	9606.ENSP00000231790,9606.ENSP00000348020	MLH1,MLH3
4	GO Function	GO:0140097	Catalytic activity, acting on DNA	4	221	1.77	0.0012	9606.ENSP00000231790,9606.ENSP00000310520,9606.ENSP00000348020,9606.ENSP00000416739	MLH1,ERCC4,MLH3,RECQL
4	GO Function	GO:0003697	Single-stranded DNA binding	3	120	1.91	0.0089	9606.ENSP00000295050,9606.ENSP00000310520,9606.ENSP00000416739	SPRTN,ERCC4,RECQL
4	GO Function	GO:0008094	ATP-dependent activity, acting on DNA	3	110	1.95	0.0089	9606.ENSP00000231790,9606.ENSP00000348020,9606.ENSP00000416739	MLH1,MLH3,RECQL
4	GO Function	GO:0030983	Mismatched DNA binding	2	14	2.67	0.0114	9606.ENSP00000231790,9606.ENSP00000348020	MLH1,MLH3
4	GO Function	GO:0140664	ATP-dependent DNA damage sensor activity	2	19	2.54	0.0133	9606.ENSP00000231790,9606.ENSP00000348020	MLH1,MLH3
4	GO Component	GO:0005712	Chiasma	2	2	3.52	0.00049	9606.ENSP00000231790,9606.ENSP00000348020	MLH1,MLH3
4	GO Component	GO:1990391	DNA repair complex	3	43	2.36	0.00049	9606.ENSP00000231790,9606.ENSP00000310520,9606.ENSP00000348020	MLH1,ERCC4,MLH3
4	GO Component	GO:0032300	Mismatch repair complex	2	8	2.91	0.0024	9606.ENSP00000231790,9606.ENSP00000348020	MLH1,MLH3
4	GO Component	GO:0005694	Chromosome	5	1850	0.95	0.0208	9606.ENSP00000231790,9606.ENSP00000295050,9606.ENSP00000310520,9606.ENSP00000348020,9606.ENSP00000416739	MLH1,SPRTN,ERCC4,MLH3,RECQL
4	GO Component	GO:0000795	Synaptonemal complex	2	40	2.22	0.0271	9606.ENSP00000231790,9606.ENSP00000348020	MLH1,MLH3
4	GO Component	GO:0001673	Male germ cell nucleus	2	50	2.12	0.0298	9606.ENSP00000231790,9606.ENSP00000348020	MLH1,MLH3
4	KEGG	hsa03430	Mismatch repair	2	23	2.46	0.0078	9606.ENSP00000231790,9606.ENSP00000348020	MLH1,MLH3
4	KEGG	hsa03460	Fanconi anemia pathway	2	51	2.11	0.0178	9606.ENSP00000231790,9606.ENSP00000310520	MLH1,ERCC4
4	WikiPathways	WP5103	Progeria-associated lipodystrophy	2	22	2.47	0.0166	9606.ENSP00000295050,9606.ENSP00000416739	SPRTN,RECQL
4	UniProt Keywords	KW-0234	DNA repair	4	325	1.61	0.00075	9606.ENSP00000231790,9606.ENSP00000295050,9606.ENSP00000310520,9606.ENSP00000348020	MLH1,SPRTN,ERCC4,MLH3
4	UniProt Keywords	KW-0362	Hereditary nonpolyposis colorectal cancer	2	8	2.91	0.00078	9606.ENSP00000231790,9606.ENSP00000348020	MLH1,MLH3
5	STRING clusters	CL:30838	Mixed, incl. Protein LRATD1/ LRATD2, and CCR4-NOT complex binding	2	5	3.2	0.0049	9606.ENSP00000247226,9606.ENSP00000249014	PLEKHG3,CDC42EP1
5	Reactome	HSA-9013408	RHOG GTPase cycle	4	73	2.33	2.45e-06	9606.ENSP00000247226,9606.ENSP00000249014,9606.ENSP00000309597,9606.ENSP00000339467	PLEKHG3,CDC42EP1,MAP3K11,RHOG
5	Reactome	HSA-9012999	RHO GTPase cycle	5	449	1.64	7.25e-06	9606.ENSP00000247226,9606.ENSP00000249014,9606.ENSP00000309597,9606.ENSP00000339467,9606.ENSP00000493664	PLEKHG3,CDC42EP1,MAP3K11,RHOG,DOCK10
5	Reactome	HSA-9013148	CDC42 GTPase cycle	4	154	2.01	1.51e-05	9606.ENSP00000247226,9606.ENSP00000249014,9606.ENSP00000309597,9606.ENSP00000493664	PLEKHG3,CDC42EP1,MAP3K11,DOCK10
5	Reactome	HSA-9013149	RAC1 GTPase cycle	3	183	1.81	0.0031	9606.ENSP00000247226,9606.ENSP00000249014,9606.ENSP00000493664	PLEKHG3,CDC42EP1,DOCK10
5	Reactome	HSA-9013406	RHOQ GTPase cycle	2	59	2.13	0.0267	9606.ENSP00000247226,9606.ENSP00000249014	PLEKHG3,CDC42EP1
6	GO Component	GO:0034703	Cation channel complex	3	225	1.72	0.0308	9606.ENSP00000288139,9606.ENSP00000319591,9606.ENSP00000378199	CACNA1D,KCND3,HSPA2
6	GO Component	GO:0005891	Voltage-gated calcium channel complex	2	44	2.25	0.0362	9606.ENSP00000288139,9606.ENSP00000378199	CACNA1D,HSPA2
6	STRING clusters	CL:22098	Voltage-gated channel, and Calmodulin-binding	3	190	1.79	0.0417	9606.ENSP00000009105,9606.ENSP00000288139,9606.ENSP00000319591	CAMK1G,CACNA1D,KCND3
6	KEGG	hsa04010	MAPK signaling pathway	3	286	1.62	0.0103	9606.ENSP00000288139,9606.ENSP00000378199,9606.ENSP00000385886	CACNA1D,HSPA2,RASGRP3
6	KEGG	hsa04925	Aldosterone synthesis and secretion	2	94	1.92	0.0391	9606.ENSP00000009105,9606.ENSP00000288139	CAMK1G,CACNA1D
6	WikiPathways	WP382	MAPK signaling pathway	3	245	1.68	0.0151	9606.ENSP00000288139,9606.ENSP00000378199,9606.ENSP00000385886	CACNA1D,HSPA2,RASGRP3
6	COMPARTMENTS	GOCC:0034703	Cation channel complex	3	202	1.77	0.0251	9606.ENSP00000288139,9606.ENSP00000319591,9606.ENSP00000378199	CACNA1D,KCND3,HSPA2
6	COMPARTMENTS	GOCC:0005891	Voltage-gated calcium channel complex	2	47	2.22	0.0426	9606.ENSP00000288139,9606.ENSP00000378199	CACNA1D,HSPA2
6	COMPARTMENTS	GOCC:0016021	Integral component of membrane	4	1507	1.02	0.0474	9606.ENSP00000288139,9606.ENSP00000319591,9606.ENSP00000378199,9606.ENSP00000385886	CACNA1D,KCND3,HSPA2,RASGRP3
6	COMPARTMENTS	GOCC:0042383	Sarcolemma	2	68	2.06	0.0474	9606.ENSP00000288139,9606.ENSP00000319591	CACNA1D,KCND3
7	STRING clusters	CL:11964	Selenocysteine, and selenocysteinyl-tRNA(Sec) biosynthetic process	3	21	2.75	7.25e-05	9606.ENSP00000367893,9606.ENSP00000371535,9606.ENSP00000425915	SEPHS1,SEPSECS,SELENOP
7	STRING clusters	CL:11992	selenocysteinyl-tRNA(Sec) biosynthetic process, and Selenocysteine insertion sequence binding	2	7	3.05	0.0017	9606.ENSP00000371535,9606.ENSP00000425915	SEPSECS,SELENOP
7	KEGG	hsa00450	Selenocompound metabolism	2	17	2.67	0.003	9606.ENSP00000367893,9606.ENSP00000371535	SEPHS1,SEPSECS
7	UniProt Keywords	KW-0711	Selenium	3	5	3.37	2.95e-07	9606.ENSP00000367893,9606.ENSP00000371535,9606.ENSP00000425915	SEPHS1,SEPSECS,SELENOP
8	GO Function	GO:0003729	mRNA binding	4	326	1.68	0.0019	9606.ENSP00000293872,9606.ENSP00000305556,9606.ENSP00000357679,9606.ENSP00000403310	LUC7L,PCBP1,CHTOP,SNRNP35
8	GO Function	GO:0003723	RNA binding	5	1672	1.07	0.011	9606.ENSP00000293872,9606.ENSP00000305556,9606.ENSP00000357679,9606.ENSP00000393388,9606.ENSP00000403310	LUC7L,PCBP1,CHTOP,SNRPG,SNRNP35
8	GO Component	GO:0005681	Spliceosomal complex	3	197	1.78	0.0161	9606.ENSP00000293872,9606.ENSP00000393388,9606.ENSP00000403310	LUC7L,SNRPG,SNRNP35
8	GO Component	GO:0005685	U1 snRNP	2	19	2.62	0.0161	9606.ENSP00000293872,9606.ENSP00000393388	LUC7L,SNRPG
8	GO Component	GO:0005689	U12-type spliceosomal complex	2	28	2.45	0.0161	9606.ENSP00000393388,9606.ENSP00000403310	SNRPG,SNRNP35
8	GO Component	GO:0036464	Cytoplasmic ribonucleoprotein granule	3	249	1.68	0.0161	9606.ENSP00000305556,9606.ENSP00000357679,9606.ENSP00000393388	PCBP1,CHTOP,SNRPG
8	GO Component	GO:0071004	U2-type prespliceosome	2	16	2.69	0.0161	9606.ENSP00000293872,9606.ENSP00000393388	LUC7L,SNRPG
8	GO Component	GO:0140513	Nuclear protein-containing complex	4	1290	1.09	0.0225	9606.ENSP00000293872,9606.ENSP00000357679,9606.ENSP00000393388,9606.ENSP00000403310	LUC7L,CHTOP,SNRPG,SNRNP35
8	Reactome	HSA-72203	Processing of Capped Intron-Containing Pre-mRNA	4	281	1.75	0.00048	9606.ENSP00000305556,9606.ENSP00000357679,9606.ENSP00000393388,9606.ENSP00000403310	PCBP1,CHTOP,SNRPG,SNRNP35
8	Reactome	HSA-72172	mRNA Splicing	3	211	1.75	0.0095	9606.ENSP00000305556,9606.ENSP00000393388,9606.ENSP00000403310	PCBP1,SNRPG,SNRNP35
8	Reactome	HSA-72165	mRNA Splicing - Minor Pathway	2	50	2.2	0.0388	9606.ENSP00000393388,9606.ENSP00000403310	SNRPG,SNRNP35
8	COMPARTMENTS	GOCC:0005681	Spliceosomal complex	3	148	1.9	0.01	9606.ENSP00000293872,9606.ENSP00000393388,9606.ENSP00000403310	LUC7L,SNRPG,SNRNP35
8	COMPARTMENTS	GOCC:0005685	U1 snRNP	2	18	2.64	0.0112	9606.ENSP00000293872,9606.ENSP00000393388	LUC7L,SNRPG
8	COMPARTMENTS	GOCC:0005689	U12-type spliceosomal complex	2	24	2.52	0.0128	9606.ENSP00000393388,9606.ENSP00000403310	SNRPG,SNRNP35
8	UniProt Keywords	KW-0694	RNA-binding	4	686	1.36	0.0049	9606.ENSP00000305556,9606.ENSP00000357679,9606.ENSP00000393388,9606.ENSP00000403310	PCBP1,CHTOP,SNRPG,SNRNP35
9	GO Component	GO:0000178	Exosome (RNase complex)	2	20	2.6	0.0243	9606.ENSP00000258169,9606.ENSP00000400646
9	STRING clusters	CL:1205	Exosome (RNase complex)	2	18	2.64	0.0447	9606.ENSP00000258169,9606.ENSP00000400646
9	COMPARTMENTS	GOCC:0000178	Exosome (RNase complex)	2	21	2.57	0.0299	9606.ENSP00000258169,9606.ENSP00000400646
10	GO Process	GO:0043122	Regulation of I-kappaB kinase/NF-kappaB signaling	4	255	1.79	0.0023	9606.ENSP00000312988,9606.ENSP00000315112,9606.ENSP00000321203,9606.ENSP00000481570	NFKBIB,RNF31,TNIP2,TNFAIP3
10	GO Process	GO:0006952	Defense response	5	1394	1.15	0.0141	9606.ENSP00000312988,9606.ENSP00000315112,9606.ENSP00000321203,9606.ENSP00000348472,9606.ENSP00000481570	NFKBIB,RNF31,TNIP2,PXK,TNFAIP3
10	GO Process	GO:0006954	Inflammatory response	4	538	1.47	0.0145	9606.ENSP00000312988,9606.ENSP00000321203,9606.ENSP00000348472,9606.ENSP00000481570	NFKBIB,TNIP2,PXK,TNFAIP3
10	GO Process	GO:0023035	CD40 signaling pathway	2	10	2.9	0.0145	9606.ENSP00000315112,9606.ENSP00000321203	RNF31,TNIP2
10	GO Process	GO:0009617	Response to bacterium	4	663	1.38	0.0199	9606.ENSP00000312988,9606.ENSP00000315112,9606.ENSP00000321203,9606.ENSP00000481570	NFKBIB,RNF31,TNIP2,TNFAIP3
10	GO Process	GO:0071222	Cellular response to lipopolysaccharide	3	195	1.78	0.0257	9606.ENSP00000312988,9606.ENSP00000321203,9606.ENSP00000481570	NFKBIB,TNIP2,TNFAIP3
10	GO Process	GO:2000352	Negative regulation of endothelial cell apoptotic process	2	31	2.41	0.0472	9606.ENSP00000321203,9606.ENSP00000481570	TNIP2,TNFAIP3
10	GO Function	GO:0070530	K63-linked polyubiquitin modification-dependent protein binding	3	24	2.69	0.00011	9606.ENSP00000315112,9606.ENSP00000321203,9606.ENSP00000481570	RNF31,TNIP2,TNFAIP3
10	STRING clusters	CL:16587	Mixed, incl. TNFR1-induced NFkappaB signaling pathway, and NF-kappa-B/Dorsal	3	43	2.44	0.00054	9606.ENSP00000312988,9606.ENSP00000315112,9606.ENSP00000321203	NFKBIB,RNF31,TNIP2
10	STRING clusters	CL:17146	Rheumatic disease, and Autosomal recessive nonsyndromic deafness 33	2	10	2.9	0.0026	9606.ENSP00000348472,9606.ENSP00000481570	PXK,TNFAIP3
10	KEGG	hsa04621	NOD-like receptor signaling pathway	3	173	1.83	0.0023	9606.ENSP00000312988,9606.ENSP00000315112,9606.ENSP00000481570	NFKBIB,RNF31,TNFAIP3
10	Reactome	HSA-5357786	TNFR1-induced proapoptotic signaling	2	24	2.52	0.0381	9606.ENSP00000315112,9606.ENSP00000481570	RNF31,TNFAIP3
10	Reactome	HSA-5357905	Regulation of TNFR1 signaling	2	46	2.23	0.0381	9606.ENSP00000315112,9606.ENSP00000481570	RNF31,TNFAIP3
10	Reactome	HSA-5357956	TNFR1-induced NFkappaB signaling pathway	2	33	2.38	0.0381	9606.ENSP00000315112,9606.ENSP00000481570	RNF31,TNFAIP3
10	Reactome	HSA-5689896	Ovarian tumor domain proteases	2	39	2.31	0.0381	9606.ENSP00000321203,9606.ENSP00000481570	TNIP2,TNFAIP3

## Sheet: module.celltype.enrichment
set1_Name	set2_Name	Background	set1_size	set2_size	expected.overlap	actual.overlap	enrichment.foldchange	odds.ratio	FET_pvalue	intersects
F2	Astrocyte	12106	7748	1714	1096.98	1046	0.953525	0.862155	0.997321	ENSG00000167186,ENSG00000011009,ENSG00000161203,ENSG00000111775,ENSG00000146648,ENSG00000166833,ENSG00000107874,ENSG00000147853,ENSG00000119013,ENSG00000171488,ENSG00000167792,ENSG00000164190,ENSG00000078177,ENSG00000175550,ENSG00000131242,ENSG00000110321,ENSG00000117410,ENSG00000152208,ENSG00000152556,ENSG00000007080,ENSG00000111666,ENSG00000213585,ENSG00000145912,ENSG00000082438,ENSG00000148737…
F2	Microglia	12106	7748	1566	1002.26	885	0.883004	0.696318	1	ENSG00000164032,ENSG00000115355,ENSG00000102218,ENSG00000146648,ENSG00000152689,ENSG00000182774,ENSG00000185668,ENSG00000131781,ENSG00000126214,ENSG00000115365,ENSG00000078177,ENSG00000197457,ENSG00000110321,ENSG00000157827,ENSG00000134072,ENSG00000174799,ENSG00000198947,ENSG00000175764,ENSG00000153707,ENSG00000142655,ENSG00000090971,ENSG00000187416,ENSG00000185818,ENSG00000126432,ENSG00000130508…
F2	Oligodendrocyte	12106	7748	2211	1415.07	1152	0.814094	0.544088	1	ENSG00000115355,ENSG00000164040,ENSG00000145725,ENSG00000149575,ENSG00000146648,ENSG00000166833,ENSG00000152689,ENSG00000144847,ENSG00000163728,ENSG00000198625,ENSG00000146083,ENSG00000091651,ENSG00000077380,ENSG00000009413,ENSG00000067167,ENSG00000159459,ENSG00000151746,ENSG00000148516,ENSG00000163328,ENSG00000117410,ENSG00000152208,ENSG00000157827,ENSG00000174943,ENSG00000148737,ENSG00000198947…
F2	Neuron	12106	7748	5889	3769.04	3584	0.950906	0.766637	1	ENSG00000109436,ENSG00000068885,ENSG00000115524,ENSG00000188573,ENSG00000094975,ENSG00000082898,ENSG00000115355,ENSG00000115665,ENSG00000158864,ENSG00000164031,ENSG00000137274,ENSG00000166111,ENSG00000164040,ENSG00000119912,ENSG00000014641,ENSG00000011009,ENSG00000121769,ENSG00000175756,ENSG00000047579,ENSG00000067208,ENSG00000131023,ENSG00000139182,ENSG00000114062,ENSG00000149575,ENSG00000065518…
F2	Endothelia	12106	7748	1694	1084.18	971	0.895606	0.720404	1	ENSG00000167186,ENSG00000078747,ENSG00000146648,ENSG00000166833,ENSG00000152689,ENSG00000182774,ENSG00000170759,ENSG00000156453,ENSG00000171488,ENSG00000167792,ENSG00000164190,ENSG00000148516,ENSG00000110321,ENSG00000117410,ENSG00000132964,ENSG00000152208,ENSG00000152556,ENSG00000111666,ENSG00000082438,ENSG00000148737,ENSG00000198947,ENSG00000023330,ENSG00000126432,ENSG00000065243,ENSG00000143797…
F3	Astrocyte	12106	2804	1714	396.998	388	0.977335	0.966	0.720498	ENSG00000135905,ENSG00000164181,ENSG00000118322,ENSG00000113296,ENSG00000066468,ENSG00000114166,ENSG00000163697,ENSG00000189067,ENSG00000166086,ENSG00000196083,ENSG00000146535,ENSG00000010278,ENSG00000213366,ENSG00000108309,ENSG00000132470,ENSG00000173786,ENSG00000184005,ENSG00000149292,ENSG00000159176,ENSG00000164161,ENSG00000167996,ENSG00000149294,ENSG00000047365,ENSG00000139737,ENSG00000153048…
F3	Microglia	12106	2804	1566	362.718	442	1.21858	1.36148	3.45645e-07	ENSG00000019144,ENSG00000184144,ENSG00000172005,ENSG00000174607,ENSG00000011426,ENSG00000013297,ENSG00000187764,ENSG00000104419,ENSG00000143382,ENSG00000204655,ENSG00000054690,ENSG00000148180,ENSG00000007944,ENSG00000135926,ENSG00000197430,ENSG00000113369,ENSG00000057704,ENSG00000124920,ENSG00000064651,ENSG00000138593,ENSG00000187239,ENSG00000109458,ENSG00000118322,ENSG00000066468,ENSG00000158859…
F3	Oligodendrocyte	12106	2804	2211	512.113	744	1.4528	1.92884	4.46867e-36	ENSG00000019144,ENSG00000205116,ENSG00000184144,ENSG00000172005,ENSG00000123560,ENSG00000082996,ENSG00000197971,ENSG00000136541,ENSG00000134198,ENSG00000174607,ENSG00000102158,ENSG00000011426,ENSG00000013297,ENSG00000164076,ENSG00000166387,ENSG00000187764,ENSG00000104419,ENSG00000204655,ENSG00000054690,ENSG00000198835,ENSG00000126391,ENSG00000148180,ENSG00000099282,ENSG00000135926,ENSG00000135362…
F3	Neuron	12106	2804	5889	1364.01	1482	1.0865	1.24513	2.0557e-07	ENSG00000019144,ENSG00000184144,ENSG00000172005,ENSG00000197971,ENSG00000136541,ENSG00000174607,ENSG00000011426,ENSG00000013297,ENSG00000164076,ENSG00000104419,ENSG00000204655,ENSG00000172375,ENSG00000054690,ENSG00000007944,ENSG00000116473,ENSG00000170775,ENSG00000167702,ENSG00000163013,ENSG00000087152,ENSG00000163462,ENSG00000135905,ENSG00000064651,ENSG00000066322,ENSG00000164303,ENSG00000156983…
F3	Endothelia	12106	2804	1694	392.365	453	1.15454	1.25159	0.000113617	ENSG00000205116,ENSG00000123560,ENSG00000136541,ENSG00000134198,ENSG00000174607,ENSG00000148180,ENSG00000197430,ENSG00000135905,ENSG00000164181,ENSG00000179178,ENSG00000169504,ENSG00000118322,ENSG00000113296,ENSG00000066468,ENSG00000114166,ENSG00000163697,ENSG00000176381,ENSG00000108381,ENSG00000167641,ENSG00000166086,ENSG00000021300,ENSG00000166348,ENSG00000136842,ENSG00000146535,ENSG00000138756…
F5	Astrocyte	12106	346	1714	48.9876	36	0.73488	0.697763	0.985416	ENSG00000147853,ENSG00000213585,ENSG00000204463,ENSG00000117519,ENSG00000169764,ENSG00000169228,ENSG00000084731,ENSG00000135597,ENSG00000175309,ENSG00000107742,ENSG00000153904,ENSG00000115241,ENSG00000136160,ENSG00000168824,ENSG00000155189,ENSG00000177807,ENSG00000125821,ENSG00000115875,ENSG00000070886,ENSG00000123352,ENSG00000109790,ENSG00000101220,ENSG00000164061,ENSG00000118816,ENSG00000147576…
F5	Microglia	12106	346	1566	44.7576	32	0.714962	0.679381	0.987327	ENSG00000115365,ENSG00000130508,ENSG00000144445,ENSG00000171603,ENSG00000144843,ENSG00000107742,ENSG00000153904,ENSG00000134243,ENSG00000109790,ENSG00000127946,ENSG00000152270,ENSG00000126759,ENSG00000250722,ENSG00000162407,ENSG00000112799,ENSG00000169252,ENSG00000184347,ENSG00000142961,ENSG00000107518,ENSG00000136897,ENSG00000198010,ENSG00000174080,ENSG00000133019,ENSG00000070190,ENSG00000028277…
F5	Oligodendrocyte	12106	346	2211	63.1923	37	0.585514	0.528016	0.999969	ENSG00000051825,ENSG00000157064,ENSG00000121766,ENSG00000114120,ENSG00000123374,ENSG00000147905,ENSG00000061987,ENSG00000150093,ENSG00000136160,ENSG00000134243,ENSG00000177807,ENSG00000050165,ENSG00000118816,ENSG00000160753,ENSG00000127946,ENSG00000152270,ENSG00000177189,ENSG00000179950,ENSG00000112799,ENSG00000107518,ENSG00000155792,ENSG00000186522,ENSG00000166900,ENSG00000198010,ENSG00000164761…
F5	Neuron	12106	346	5889	168.313	174	1.03379	1.07	0.285588	ENSG00000109436,ENSG00000166111,ENSG00000142327,ENSG00000146802,ENSG00000115365,ENSG00000001631,ENSG00000151923,ENSG00000134874,ENSG00000130508,ENSG00000221978,ENSG00000157064,ENSG00000143126,ENSG00000198598,ENSG00000144445,ENSG00000204463,ENSG00000178467,ENSG00000121766,ENSG00000185728,ENSG00000116396,ENSG00000114120,ENSG00000157741,ENSG00000105568,ENSG00000090686,ENSG00000171603,ENSG00000103723…
F5	Endothelia	12106	346	1694	48.416	36	0.743556	0.70758	0.981929	ENSG00000204463,ENSG00000117519,ENSG00000169228,ENSG00000084731,ENSG00000135597,ENSG00000107742,ENSG00000153904,ENSG00000115241,ENSG00000136160,ENSG00000134243,ENSG00000168824,ENSG00000177807,ENSG00000070886,ENSG00000123352,ENSG00000109790,ENSG00000101220,ENSG00000164061,ENSG00000118816,ENSG00000147576,ENSG00000177189,ENSG00000007062,ENSG00000250722,ENSG00000162407,ENSG00000112799,ENSG00000107518…
F6	Astrocyte	12106	342	1714	48.4213	36	0.743475	0.707164	0.982032	ENSG00000167186,ENSG00000171488,ENSG00000110321,ENSG00000148737,ENSG00000162599,ENSG00000113658,ENSG00000178075,ENSG00000135144,ENSG00000135916,ENSG00000249915,ENSG00000132155,ENSG00000108774,ENSG00000169554,ENSG00000067560,ENSG00000171951,ENSG00000173457,ENSG00000075884,ENSG00000101365,ENSG00000075142,ENSG00000172270,ENSG00000198822,ENSG00000160838,ENSG00000141232,ENSG00000174721,ENSG00000176601…
F6	Microglia	12106	342	1566	44.2402	34	0.768532	0.737293	0.964166	ENSG00000110321,ENSG00000153707,ENSG00000137710,ENSG00000080822,ENSG00000001629,ENSG00000178075,ENSG00000163539,ENSG00000064393,ENSG00000171951,ENSG00000075884,ENSG00000165209,ENSG00000137103,ENSG00000197147,ENSG00000198822,ENSG00000000460,ENSG00000078304,ENSG00000169271,ENSG00000134851,ENSG00000244694,ENSG00000108179,ENSG00000108523,ENSG00000135677,ENSG00000090372,ENSG00000177679,ENSG00000165475…
F6	Oligodendrocyte	12106	342	2211	62.4618	54	0.864529	0.835114	0.900103	ENSG00000163328,ENSG00000148737,ENSG00000153707,ENSG00000084733,ENSG00000162599,ENSG00000137710,ENSG00000080822,ENSG00000165238,ENSG00000001629,ENSG00000160131,ENSG00000163539,ENSG00000126777,ENSG00000162607,ENSG00000060237,ENSG00000147862,ENSG00000166963,ENSG00000198171,ENSG00000064393,ENSG00000163832,ENSG00000169554,ENSG00000138760,ENSG00000171951,ENSG00000214367,ENSG00000082701,ENSG00000105855…
F6	Neuron	12106	342	5889	166.367	167	1.00381	1.00765	0.493988	ENSG00000068885,ENSG00000133878,ENSG00000106367,ENSG00000174233,ENSG00000175662,ENSG00000163328,ENSG00000110321,ENSG00000148737,ENSG00000153707,ENSG00000084733,ENSG00000097033,ENSG00000162599,ENSG00000080822,ENSG00000121753,ENSG00000181790,ENSG00000172932,ENSG00000167779,ENSG00000080345,ENSG00000114209,ENSG00000126461,ENSG00000186908,ENSG00000130338,ENSG00000110497,ENSG00000165238,ENSG00000105429…
F6	Endothelia	12106	342	1694	47.8563	35	0.731357	0.694436	0.985528	ENSG00000167186,ENSG00000078747,ENSG00000171488,ENSG00000110321,ENSG00000148737,ENSG00000162599,ENSG00000080822,ENSG00000001629,ENSG00000178075,ENSG00000163539,ENSG00000135916,ENSG00000147862,ENSG00000064393,ENSG00000132688,ENSG00000169554,ENSG00000067560,ENSG00000171951,ENSG00000244607,ENSG00000075884,ENSG00000165209,ENSG00000075142,ENSG00000172270,ENSG00000198822,ENSG00000197111,ENSG00000184470…
F7	Astrocyte	12106	862	1714	122.044	91	0.745631	0.699685	0.999529	ENSG00000117410,ENSG00000127837,ENSG00000143797,ENSG00000119787,ENSG00000107317,ENSG00000162944,ENSG00000120251,ENSG00000064042,ENSG00000139687,ENSG00000089693,ENSG00000075618,ENSG00000155366,ENSG00000085662,ENSG00000172602,ENSG00000175334,ENSG00000140990,ENSG00000129562,ENSG00000104361,ENSG00000083857,ENSG00000130811,ENSG00000163702,ENSG00000133872,ENSG00000133687,ENSG00000123064,ENSG00000135541…
F7	Microglia	12106	862	1566	111.506	88	0.789195	0.751267	0.995276	ENSG00000115355,ENSG00000175764,ENSG00000090971,ENSG00000143970,ENSG00000107317,ENSG00000162944,ENSG00000108654,ENSG00000064042,ENSG00000070018,ENSG00000174125,ENSG00000075618,ENSG00000155366,ENSG00000089248,ENSG00000116649,ENSG00000149357,ENSG00000115234,ENSG00000173611,ENSG00000173171,ENSG00000178719,ENSG00000135541,ENSG00000129559,ENSG00000132432,ENSG00000185630,ENSG00000104763,ENSG00000131370…
F7	Oligodendrocyte	12106	862	2211	157.433	108	0.686007	0.622632	0.999999	ENSG00000115355,ENSG00000145725,ENSG00000067167,ENSG00000151746,ENSG00000117410,ENSG00000146247,ENSG00000143797,ENSG00000107317,ENSG00000197982,ENSG00000162923,ENSG00000120251,ENSG00000064042,ENSG00000106089,ENSG00000070018,ENSG00000183087,ENSG00000118007,ENSG00000003987,ENSG00000174125,ENSG00000022267,ENSG00000168679,ENSG00000075618,ENSG00000198887,ENSG00000149357,ENSG00000080839,ENSG00000106400…
F7	Neuron	12106	862	5889	419.322	400	0.95392	0.907774	0.919544	ENSG00000115524,ENSG00000188573,ENSG00000115355,ENSG00000115665,ENSG00000123992,ENSG00000055609,ENSG00000115694,ENSG00000164880,ENSG00000172354,ENSG00000151746,ENSG00000155545,ENSG00000117410,ENSG00000173889,ENSG00000172725,ENSG00000172531,ENSG00000250510,ENSG00000175764,ENSG00000172869,ENSG00000165527,ENSG00000113763,ENSG00000134780,ENSG00000143797,ENSG00000143970,ENSG00000107317,ENSG00000112159…
F7	Endothelia	12106	862	1694	120.62	87	0.721272	0.673222	0.999847	ENSG00000117410,ENSG00000143797,ENSG00000107317,ENSG00000162944,ENSG00000108654,ENSG00000120251,ENSG00000106089,ENSG00000168679,ENSG00000075618,ENSG00000155366,ENSG00000117791,ENSG00000105974,ENSG00000184489,ENSG00000011114,ENSG00000083857,ENSG00000133872,ENSG00000133687,ENSG00000123064,ENSG00000135541,ENSG00000067606,ENSG00000168913,ENSG00000132002,ENSG00000110906,ENSG00000132432,ENSG00000114999…
F9	Astrocyte	12106	524	1714	74.1893	79	1.06484	1.08006	0.287093	ENSG00000161203,ENSG00000146648,ENSG00000097021,ENSG00000111674,ENSG00000111669,ENSG00000076641,ENSG00000141552,ENSG00000258947,ENSG00000018408,ENSG00000127824,ENSG00000128463,ENSG00000134056,ENSG00000102144,ENSG00000120333,ENSG00000135441,ENSG00000149485,ENSG00000101438,ENSG00000113068,ENSG00000148700,ENSG00000204681,ENSG00000155897,ENSG00000143776,ENSG00000050393,ENSG00000172817,ENSG00000164106…
F9	Microglia	12106	524	1566	67.7832	64	0.944186	0.933702	0.712181	ENSG00000164032,ENSG00000146648,ENSG00000197457,ENSG00000111674,ENSG00000122122,ENSG00000076641,ENSG00000156869,ENSG00000145390,ENSG00000102144,ENSG00000139233,ENSG00000184524,ENSG00000198108,ENSG00000168016,ENSG00000178127,ENSG00000184368,ENSG00000164106,ENSG00000176788,ENSG00000139200,ENSG00000101210,ENSG00000151474,ENSG00000164066,ENSG00000106799,ENSG00000111731,ENSG00000164100,ENSG00000134594…
F9	Oligodendrocyte	12106	524	2211	95.7016	74	0.773237	0.726825	0.995821	ENSG00000146648,ENSG00000148516,ENSG00000111674,ENSG00000111669,ENSG00000122122,ENSG00000258947,ENSG00000102144,ENSG00000038532,ENSG00000074317,ENSG00000159164,ENSG00000198108,ENSG00000154917,ENSG00000079482,ENSG00000135441,ENSG00000149485,ENSG00000101438,ENSG00000023228,ENSG00000204681,ENSG00000128739,ENSG00000155897,ENSG00000139436,ENSG00000184368,ENSG00000164106,ENSG00000151474,ENSG00000168785…
F9	Neuron	12106	524	5889	254.901	243	0.95331	0.909206	0.866129	ENSG00000014641,ENSG00000065518,ENSG00000168924,ENSG00000197457,ENSG00000105220,ENSG00000168769,ENSG00000114650,ENSG00000161011,ENSG00000097021,ENSG00000139112,ENSG00000111674,ENSG00000111669,ENSG00000110171,ENSG00000175166,ENSG00000258947,ENSG00000198087,ENSG00000127824,ENSG00000145390,ENSG00000197885,ENSG00000136878,ENSG00000117118,ENSG00000120254,ENSG00000106976,ENSG00000148834,ENSG00000134056…
F9	Endothelia	12106	524	1694	73.3236	69	0.941033	0.929193	0.729808	ENSG00000146648,ENSG00000148516,ENSG00000111674,ENSG00000018408,ENSG00000198087,ENSG00000127824,ENSG00000145390,ENSG00000106976,ENSG00000135441,ENSG00000149485,ENSG00000187527,ENSG00000101438,ENSG00000113068,ENSG00000148700,ENSG00000204681,ENSG00000128739,ENSG00000155897,ENSG00000146242,ENSG00000128596,ENSG00000172817,ENSG00000164106,ENSG00000120053,ENSG00000168785,ENSG00000163378,ENSG00000177576…
F10	Astrocyte	12106	294	1714	41.6253	35	0.840835	0.815573	0.888189	ENSG00000007080,ENSG00000145912,ENSG00000142676,ENSG00000165072,ENSG00000143256,ENSG00000125445,ENSG00000151276,ENSG00000243449,ENSG00000176597,ENSG00000125458,ENSG00000239672,ENSG00000120071,ENSG00000176771,ENSG00000196569,ENSG00000148219,ENSG00000064989,ENSG00000101367,ENSG00000228474,ENSG00000164105,ENSG00000173327,ENSG00000164418,ENSG00000167004,ENSG00000183978,ENSG00000073756,ENSG00000196743…
F10	Microglia	12106	294	1566	38.0311	32	0.841418	0.818349	0.876356	ENSG00000142676,ENSG00000117569,ENSG00000183011,ENSG00000198756,ENSG00000172292,ENSG00000198522,ENSG00000165072,ENSG00000134318,ENSG00000150977,ENSG00000163568,ENSG00000162783,ENSG00000125691,ENSG00000177700,ENSG00000176597,ENSG00000120071,ENSG00000143368,ENSG00000196569,ENSG00000092010,ENSG00000012174,ENSG00000111647,ENSG00000145685,ENSG00000164418,ENSG00000167004,ENSG00000073756,ENSG00000100889…
F10	Oligodendrocyte	12106	294	2211	53.6952	36	0.670451	0.618279	0.998168	ENSG00000117569,ENSG00000167363,ENSG00000172292,ENSG00000173542,ENSG00000134318,ENSG00000150977,ENSG00000168916,ENSG00000151276,ENSG00000169439,ENSG00000243449,ENSG00000015171,ENSG00000176771,ENSG00000148219,ENSG00000064989,ENSG00000164418,ENSG00000112701,ENSG00000129515,ENSG00000123124,ENSG00000185963,ENSG00000161021,ENSG00000168137,ENSG00000105696,ENSG00000041982,ENSG00000166401,ENSG00000106355…
F10	Neuron	12106	294	5889	143.017	126	0.881013	0.787237	0.980905	ENSG00000125356,ENSG00000176340,ENSG00000007080,ENSG00000128609,ENSG00000144834,ENSG00000119421,ENSG00000131495,ENSG00000242173,ENSG00000142676,ENSG00000145494,ENSG00000129932,ENSG00000172731,ENSG00000141002,ENSG00000132329,ENSG00000137288,ENSG00000142330,ENSG00000205220,ENSG00000142686,ENSG00000198756,ENSG00000172292,ENSG00000184602,ENSG00000037042,ENSG00000143256,ENSG00000134318,ENSG00000125445…
F10	Endothelia	12106	294	1694	41.1396	26	0.631994	0.590023	0.997506	ENSG00000198756,ENSG00000165072,ENSG00000166169,ENSG00000168916,ENSG00000125691,ENSG00000243449,ENSG00000176597,ENSG00000143368,ENSG00000176771,ENSG00000196569,ENSG00000092010,ENSG00000135253,ENSG00000064989,ENSG00000164105,ENSG00000173327,ENSG00000164418,ENSG00000122585,ENSG00000073756,ENSG00000196743,ENSG00000104343,ENSG00000041982,ENSG00000132824,ENSG00000167460,ENSG00000138193,ENSG00000140443…
F12	Astrocyte	12106	426	1714	60.3142	40	0.663193	0.619433	0.999	ENSG00000111775,ENSG00000078177,ENSG00000149809,ENSG00000124702,ENSG00000204370,ENSG00000154310,ENSG00000172461,ENSG00000104886,ENSG00000153253,ENSG00000109452,ENSG00000085224,ENSG00000181722,ENSG00000090273,ENSG00000054967,ENSG00000150433,ENSG00000114670,ENSG00000196091,ENSG00000075043,ENSG00000117868,ENSG00000166165,ENSG00000143324,ENSG00000109738,ENSG00000177606,ENSG00000131669,ENSG00000144642…
F12	Microglia	12106	426	1566	55.1062	36	0.653284	0.612391	0.998782	ENSG00000078177,ENSG00000134072,ENSG00000142655,ENSG00000185818,ENSG00000158987,ENSG00000115828,ENSG00000066084,ENSG00000172461,ENSG00000196405,ENSG00000124614,ENSG00000178177,ENSG00000141298,ENSG00000172985,ENSG00000109452,ENSG00000198919,ENSG00000107829,ENSG00000115977,ENSG00000186001,ENSG00000185278,ENSG00000149311,ENSG00000204264,ENSG00000229453,ENSG00000177606,ENSG00000144642,ENSG00000140044…
F12	Oligodendrocyte	12106	426	2211	77.8032	49	0.629794	0.572227	0.99996	ENSG00000164040,ENSG00000091651,ENSG00000160460,ENSG00000204574,ENSG00000187147,ENSG00000116871,ENSG00000107902,ENSG00000069424,ENSG00000154310,ENSG00000066084,ENSG00000172461,ENSG00000122482,ENSG00000196405,ENSG00000178177,ENSG00000163939,ENSG00000066933,ENSG00000141298,ENSG00000172469,ENSG00000101911,ENSG00000153253,ENSG00000172985,ENSG00000109452,ENSG00000181722,ENSG00000114423,ENSG00000075043…
F12	Neuron	12106	426	5889	207.229	205	0.989244	0.978517	0.605991	ENSG00000094975,ENSG00000158864,ENSG00000164040,ENSG00000047579,ENSG00000114062,ENSG00000185591,ENSG00000091651,ENSG00000149541,ENSG00000078177,ENSG00000134072,ENSG00000141933,ENSG00000115904,ENSG00000144228,ENSG00000157782,ENSG00000185818,ENSG00000160460,ENSG00000138623,ENSG00000171159,ENSG00000116586,ENSG00000159352,ENSG00000197530,ENSG00000140199,ENSG00000025796,ENSG00000149809,ENSG00000106636…
F12	Endothelia	12106	426	1694	59.6104	36	0.603921	0.557991	0.999864	ENSG00000137845,ENSG00000154310,ENSG00000172461,ENSG00000124614,ENSG00000162817,ENSG00000153253,ENSG00000109452,ENSG00000181722,ENSG00000117868,ENSG00000166165,ENSG00000130511,ENSG00000149311,ENSG00000075223,ENSG00000109738,ENSG00000177606,ENSG00000102359,ENSG00000131669,ENSG00000144642,ENSG00000169641,ENSG00000197859,ENSG00000069535,ENSG00000198918,ENSG00000005243,ENSG00000137965,ENSG00000144285…
F13	Astrocyte	12106	368	1714	52.1024	49	0.940455	0.929275	0.703646	ENSG00000166833,ENSG00000111666,ENSG00000132424,ENSG00000136044,ENSG00000154096,ENSG00000063244,ENSG00000143761,ENSG00000143106,ENSG00000011405,ENSG00000104517,ENSG00000117525,ENSG00000205268,ENSG00000184384,ENSG00000111783,ENSG00000117448,ENSG00000079257,ENSG00000244754,ENSG00000110328,ENSG00000137601,ENSG00000089199,ENSG00000031698,ENSG00000153944,ENSG00000052126,ENSG00000076248,ENSG00000138107…
F13	Microglia	12106	368	1566	47.6035	32	0.672219	0.633535	0.996097	ENSG00000126214,ENSG00000175592,ENSG00000166313,ENSG00000101974,ENSG00000111344,ENSG00000184384,ENSG00000111783,ENSG00000110328,ENSG00000213047,ENSG00000168291,ENSG00000198169,ENSG00000052126,ENSG00000162511,ENSG00000141526,ENSG00000156398,ENSG00000130775,ENSG00000198929,ENSG00000123338,ENSG00000146070,ENSG00000113552,ENSG00000105290,ENSG00000136870,ENSG00000107968,ENSG00000078328,ENSG00000013583…
F13	Oligodendrocyte	12106	368	2211	67.2103	47	0.699297	0.647808	0.998419	ENSG00000166833,ENSG00000144847,ENSG00000163728,ENSG00000167654,ENSG00000185946,ENSG00000136044,ENSG00000154096,ENSG00000145860,ENSG00000134884,ENSG00000104517,ENSG00000054793,ENSG00000066248,ENSG00000117525,ENSG00000143190,ENSG00000184384,ENSG00000143799,ENSG00000178996,ENSG00000173905,ENSG00000055917,ENSG00000051341,ENSG00000116514,ENSG00000170185,ENSG00000157193,ENSG00000166311,ENSG00000139618…
F13	Neuron	12106	368	5889	179.015	179	0.999918	0.999855	0.521555	ENSG00000067208,ENSG00000139182,ENSG00000166833,ENSG00000129355,ENSG00000165271,ENSG00000163728,ENSG00000146063,ENSG00000126214,ENSG00000111666,ENSG00000119778,ENSG00000132424,ENSG00000167654,ENSG00000165752,ENSG00000068878,ENSG00000213341,ENSG00000117620,ENSG00000156515,ENSG00000103502,ENSG00000114857,ENSG00000154096,ENSG00000110888,ENSG00000185219,ENSG00000143761,ENSG00000102879,ENSG00000145794…
F13	Endothelia	12106	368	1694	51.4945	40	0.776783	0.743522	0.969711	ENSG00000166833,ENSG00000111666,ENSG00000136044,ENSG00000063244,ENSG00000011405,ENSG00000129292,ENSG00000101974,ENSG00000117525,ENSG00000205268,ENSG00000184384,ENSG00000111783,ENSG00000079257,ENSG00000244754,ENSG00000173905,ENSG00000110328,ENSG00000089199,ENSG00000163820,ENSG00000125772,ENSG00000130294,ENSG00000031698,ENSG00000153944,ENSG00000162511,ENSG00000148488,ENSG00000116641,ENSG00000198929…
F17	Astrocyte	12106	79	1714	11.185	6	0.536431	0.496591	0.975384	ENSG00000150625,ENSG00000130227,ENSG00000108953,ENSG00000204160,ENSG00000034677,ENSG00000101542
F17	Microglia	12106	79	1566	10.2192	6	0.587128	0.551498	0.952721	ENSG00000107719,ENSG00000110446,ENSG00000100311,ENSG00000100060,ENSG00000103066,ENSG00000101542
F17	Oligodendrocyte	12106	79	2211	14.4283	12	0.831699	0.800487	0.80163	ENSG00000196821,ENSG00000147571,ENSG00000163644,ENSG00000173273,ENSG00000150625,ENSG00000112576,ENSG00000105887,ENSG00000118971,ENSG00000116984,ENSG00000110446,ENSG00000103066,ENSG00000101542
F17	Neuron	12106	79	5889	38.4298	40	1.04086	1.0833	0.404232	ENSG00000164031,ENSG00000198646,ENSG00000146463,ENSG00000128482,ENSG00000176978,ENSG00000169683,ENSG00000147571,ENSG00000140983,ENSG00000163644,ENSG00000173273,ENSG00000150625,ENSG00000186432,ENSG00000112584,ENSG00000177311,ENSG00000130227,ENSG00000058453,ENSG00000112576,ENSG00000178233,ENSG00000108953,ENSG00000143554,ENSG00000104369,ENSG00000204160,ENSG00000172732,ENSG00000105887,ENSG00000185619…
F17	Endothelia	12106	79	1694	11.0545	10	0.904607	0.890112	0.68291	ENSG00000150625,ENSG00000130227,ENSG00000108953,ENSG00000034677,ENSG00000100813,ENSG00000174326,ENSG00000107719,ENSG00000100311,ENSG00000100060,ENSG00000101542
F18	Astrocyte	12106	1151	1714	162.962	156	0.95728	0.945616	0.744839	ENSG00000011009,ENSG00000107874,ENSG00000119013,ENSG00000167792,ENSG00000164190,ENSG00000131242,ENSG00000152208,ENSG00000152556,ENSG00000082438,ENSG00000198947,ENSG00000151729,ENSG00000126432,ENSG00000105701,ENSG00000135624,ENSG00000172757,ENSG00000277791,ENSG00000180992,ENSG00000090238,ENSG00000143420,ENSG00000138413,ENSG00000234224,ENSG00000119711,ENSG00000163479,ENSG00000148498,ENSG00000108518…
F18	Microglia	12106	1151	1566	148.89	119	0.799246	0.757702	0.997989	ENSG00000102218,ENSG00000152689,ENSG00000185668,ENSG00000157827,ENSG00000174799,ENSG00000198947,ENSG00000187416,ENSG00000126432,ENSG00000116254,ENSG00000114331,ENSG00000172757,ENSG00000154146,ENSG00000084070,ENSG00000142507,ENSG00000180992,ENSG00000012983,ENSG00000140262,ENSG00000108518,ENSG00000188191,ENSG00000102531,ENSG00000176884,ENSG00000102003,ENSG00000189043,ENSG00000158195,ENSG00000155324…
F18	Oligodendrocyte	12106	1151	2211	210.215	162	0.77064	0.711996	0.999971	ENSG00000152689,ENSG00000198625,ENSG00000077380,ENSG00000009413,ENSG00000159459,ENSG00000152208,ENSG00000157827,ENSG00000198947,ENSG00000187416,ENSG00000107771,ENSG00000214253,ENSG00000152601,ENSG00000020129,ENSG00000178449,ENSG00000012983,ENSG00000182287,ENSG00000140262,ENSG00000148498,ENSG00000188191,ENSG00000102531,ENSG00000137478,ENSG00000196586,ENSG00000176884,ENSG00000102003,ENSG00000112531…
F18	Neuron	12106	1151	5889	559.907	533	0.951943	0.901597	0.955406	ENSG00000082898,ENSG00000137274,ENSG00000119912,ENSG00000011009,ENSG00000121769,ENSG00000175756,ENSG00000131023,ENSG00000055208,ENSG00000185668,ENSG00000170759,ENSG00000081154,ENSG00000054116,ENSG00000119013,ENSG00000167792,ENSG00000095787,ENSG00000106263,ENSG00000164190,ENSG00000077380,ENSG00000009413,ENSG00000142920,ENSG00000130204,ENSG00000159459,ENSG00000131242,ENSG00000166548,ENSG00000152208…
F18	Endothelia	12106	1151	1694	161.06	143	0.887867	0.860165	0.952931	ENSG00000152689,ENSG00000170759,ENSG00000156453,ENSG00000167792,ENSG00000164190,ENSG00000132964,ENSG00000152208,ENSG00000152556,ENSG00000082438,ENSG00000198947,ENSG00000126432,ENSG00000065243,ENSG00000116254,ENSG00000172757,ENSG00000152601,ENSG00000090238,ENSG00000138413,ENSG00000234224,ENSG00000119711,ENSG00000140416,ENSG00000148498,ENSG00000137478,ENSG00000196586,ENSG00000204231,ENSG00000112531…
F19	Astrocyte	12106	182	1714	25.768	31	1.20304	1.2492	0.155277	ENSG00000175550,ENSG00000068976,ENSG00000131469,ENSG00000174748,ENSG00000106153,ENSG00000149806,ENSG00000130520,ENSG00000144713,ENSG00000103489,ENSG00000104904,ENSG00000105372,ENSG00000088727,ENSG00000254858,ENSG00000197958,ENSG00000116147,ENSG00000163288,ENSG00000110675,ENSG00000198838,ENSG00000166263,ENSG00000128585,ENSG00000164587,ENSG00000110011,ENSG00000156113,ENSG00000165512,ENSG00000101198…
F19	Microglia	12106	182	1566	23.543	25	1.06189	1.07292	0.405804	ENSG00000182774,ENSG00000131469,ENSG00000174748,ENSG00000149806,ENSG00000198586,ENSG00000124406,ENSG00000105372,ENSG00000237515,ENSG00000206579,ENSG00000116147,ENSG00000106617,ENSG00000110675,ENSG00000198838,ENSG00000182179,ENSG00000128585,ENSG00000171813,ENSG00000164587,ENSG00000125675,ENSG00000198216,ENSG00000168843,ENSG00000156113,ENSG00000067798,ENSG00000172572,ENSG00000130522,ENSG00000128294
F19	Oligodendrocyte	12106	182	2211	33.2399	40	1.20337	1.26544	0.114614	ENSG00000246705,ENSG00000149806,ENSG00000130520,ENSG00000196712,ENSG00000198586,ENSG00000173517,ENSG00000103489,ENSG00000157764,ENSG00000115091,ENSG00000124406,ENSG00000105372,ENSG00000237515,ENSG00000164796,ENSG00000171681,ENSG00000206579,ENSG00000170921,ENSG00000116147,ENSG00000163288,ENSG00000198838,ENSG00000108830,ENSG00000156103,ENSG00000170946,ENSG00000167588,ENSG00000196199,ENSG00000128585…
F19	Neuron	12106	182	5889	88.5344	96	1.08432	1.18139	0.148971	ENSG00000102109,ENSG00000175550,ENSG00000125912,ENSG00000131469,ENSG00000174748,ENSG00000143774,ENSG00000167658,ENSG00000149806,ENSG00000130520,ENSG00000182512,ENSG00000196712,ENSG00000066557,ENSG00000198586,ENSG00000203965,ENSG00000175602,ENSG00000144713,ENSG00000173517,ENSG00000103489,ENSG00000115159,ENSG00000157764,ENSG00000115091,ENSG00000074855,ENSG00000124406,ENSG00000155970,ENSG00000134480…
F19	Endothelia	12106	182	1694	25.4674	21	0.824585	0.799229	0.858676	ENSG00000182774,ENSG00000131469,ENSG00000103489,ENSG00000131143,ENSG00000105372,ENSG00000206579,ENSG00000116147,ENSG00000163288,ENSG00000110675,ENSG00000198838,ENSG00000108830,ENSG00000170946,ENSG00000170340,ENSG00000128585,ENSG00000204536,ENSG00000164587,ENSG00000110011,ENSG00000101198,ENSG00000130522,ENSG00000103175,ENSG00000033170
F20	Astrocyte	12106	77	1714	10.9019	18	1.65109	1.8586	0.0199819	ENSG00000179222,ENSG00000156475,ENSG00000163273,ENSG00000197362,ENSG00000120885,ENSG00000054179,ENSG00000021645,ENSG00000166448,ENSG00000172594,ENSG00000155511,ENSG00000106991,ENSG00000196230,ENSG00000188803,ENSG00000076604,ENSG00000131069,ENSG00000161270,ENSG00000125851,ENSG00000187773
F20	Microglia	12106	77	1566	9.96052	12	1.20476	1.24441	0.289673	ENSG00000175874,ENSG00000139970,ENSG00000155093,ENSG00000157152,ENSG00000179104,ENSG00000198513,ENSG00000221866,ENSG00000155511,ENSG00000173258,ENSG00000171587,ENSG00000125851,ENSG00000105612
F20	Oligodendrocyte	12106	77	2211	14.063	22	1.56439	1.79798	0.0175501	ENSG00000149575,ENSG00000147416,ENSG00000179222,ENSG00000122952,ENSG00000156475,ENSG00000139970,ENSG00000138757,ENSG00000155093,ENSG00000166848,ENSG00000157152,ENSG00000021645,ENSG00000179104,ENSG00000138821,ENSG00000166448,ENSG00000221866,ENSG00000155511,ENSG00000173258,ENSG00000196230,ENSG00000188803,ENSG00000101079,ENSG00000171587,ENSG00000160209
F20	Neuron	12106	77	5889	37.4569	38	1.0145	1.02882	0.495661	ENSG00000149575,ENSG00000147416,ENSG00000179222,ENSG00000198934,ENSG00000175874,ENSG00000122952,ENSG00000198932,ENSG00000156475,ENSG00000139970,ENSG00000138757,ENSG00000214753,ENSG00000155093,ENSG00000120885,ENSG00000078053,ENSG00000075461,ENSG00000166848,ENSG00000157152,ENSG00000021645,ENSG00000179104,ENSG00000166448,ENSG00000198513,ENSG00000221866,ENSG00000172594,ENSG00000155511,ENSG00000173258…
F20	Endothelia	12106	77	1694	10.7747	13	1.20653	1.25038	0.275981	ENSG00000179222,ENSG00000156475,ENSG00000163273,ENSG00000120885,ENSG00000054179,ENSG00000138821,ENSG00000166448,ENSG00000172594,ENSG00000155511,ENSG00000106991,ENSG00000125851,ENSG00000187773,ENSG00000129757
F21	Astrocyte	12106	54	1714	7.64547	10	1.30796	1.38013	0.22725	ENSG00000182771,ENSG00000196072,ENSG00000197746,ENSG00000116678,ENSG00000137693,ENSG00000147677,ENSG00000140280,ENSG00000074201,ENSG00000152779,ENSG00000186951
F21	Microglia	12106	54	1566	6.9853	7	1.0021	1.00243	0.55868	ENSG00000138449,ENSG00000130558,ENSG00000182771,ENSG00000128656,ENSG00000197746,ENSG00000153029,ENSG00000211445
F21	Oligodendrocyte	12106	54	2211	9.86238	4	0.405582	0.356883	0.993356	ENSG00000182771,ENSG00000161800,ENSG00000160208,ENSG00000132639
F21	Neuron	12106	54	5889	26.2685	25	0.951712	0.909725	0.684754	ENSG00000149792,ENSG00000204356,ENSG00000138449,ENSG00000249992,ENSG00000130558,ENSG00000182771,ENSG00000136425,ENSG00000196072,ENSG00000128656,ENSG00000205084,ENSG00000197746,ENSG00000161800,ENSG00000175354,ENSG00000166974,ENSG00000218739,ENSG00000116678,ENSG00000087111,ENSG00000115539,ENSG00000128607,ENSG00000211445,ENSG00000179361,ENSG00000139726,ENSG00000154639,ENSG00000160208,ENSG00000132639
F21	Endothelia	12106	54	1694	7.55625	8	1.05873	1.06928	0.489815	ENSG00000138449,ENSG00000182771,ENSG00000122786,ENSG00000197746,ENSG00000137693,ENSG00000157110,ENSG00000140280,ENSG00000186951
F22	Astrocyte	12106	299	1714	42.3332	51	1.20473	1.25437	0.0873905	ENSG00000135744,ENSG00000147872,ENSG00000116761,ENSG00000008311,ENSG00000162267,ENSG00000137561,ENSG00000120915,ENSG00000116285,ENSG00000072778,ENSG00000116171,ENSG00000093217,ENSG00000145022,ENSG00000042286,ENSG00000198755,ENSG00000176204,ENSG00000005469,ENSG00000004468,ENSG00000086062,ENSG00000188243,ENSG00000111837,ENSG00000142871,ENSG00000166123,ENSG00000164741,ENSG00000116030,ENSG00000187678…
F22	Microglia	12106	299	1566	38.6778	42	1.08589	1.10271	0.30578	ENSG00000131781,ENSG00000147872,ENSG00000106366,ENSG00000005471,ENSG00000188641,ENSG00000241399,ENSG00000112893,ENSG00000118640,ENSG00000131724,ENSG00000168994,ENSG00000172403,ENSG00000028137,ENSG00000170458,ENSG00000176204,ENSG00000086062,ENSG00000143333,ENSG00000180233,ENSG00000170624,ENSG00000155629,ENSG00000164741,ENSG00000172530,ENSG00000030582,ENSG00000117155,ENSG00000184305,ENSG00000128604…
F22	Oligodendrocyte	12106	299	2211	54.6084	39	0.714176	0.665425	0.994307	ENSG00000130695,ENSG00000188641,ENSG00000079931,ENSG00000112893,ENSG00000181773,ENSG00000138207,ENSG00000119042,ENSG00000028137,ENSG00000009724,ENSG00000162670,ENSG00000145022,ENSG00000106538,ENSG00000176204,ENSG00000188243,ENSG00000170624,ENSG00000155629,ENSG00000164741,ENSG00000172780,ENSG00000178878,ENSG00000135124,ENSG00000105518,ENSG00000138346,ENSG00000184305,ENSG00000143367,ENSG00000175130…
F22	Neuron	12106	299	5889	145.449	110	0.756277	0.607116	0.999989	ENSG00000023330,ENSG00000135744,ENSG00000182704,ENSG00000115594,ENSG00000049239,ENSG00000143845,ENSG00000115758,ENSG00000177595,ENSG00000188641,ENSG00000106327,ENSG00000166741,ENSG00000137561,ENSG00000186350,ENSG00000130707,ENSG00000112893,ENSG00000181773,ENSG00000118640,ENSG00000120742,ENSG00000114480,ENSG00000140563,ENSG00000197747,ENSG00000138207,ENSG00000107371,ENSG00000175216,ENSG00000140284…
F22	Endothelia	12106	299	1694	41.8393	46	1.09945	1.12076	0.264422	ENSG00000023330,ENSG00000135744,ENSG00000116761,ENSG00000115594,ENSG00000162267,ENSG00000120341,ENSG00000137561,ENSG00000120915,ENSG00000116285,ENSG00000112893,ENSG00000118640,ENSG00000100065,ENSG00000145022,ENSG00000106538,ENSG00000176204,ENSG00000005469,ENSG00000144597,ENSG00000004468,ENSG00000086062,ENSG00000143333,ENSG00000142871,ENSG00000166123,ENSG00000164741,ENSG00000178878,ENSG00000139410…
F23	Astrocyte	12106	295	1714	41.7669	44	1.05347	1.0645	0.378092	ENSG00000150782,ENSG00000171617,ENSG00000185352,ENSG00000119283,ENSG00000004799,ENSG00000106537,ENSG00000007001,ENSG00000168036,ENSG00000110786,ENSG00000169299,ENSG00000170469,ENSG00000127249,ENSG00000116151,ENSG00000198034,ENSG00000134115,ENSG00000156482,ENSG00000173706,ENSG00000134775,ENSG00000148229,ENSG00000138795,ENSG00000111142,ENSG00000143110,ENSG00000188846,ENSG00000115380,ENSG00000114738…
F23	Microglia	12106	295	1566	38.1604	37	0.969591	0.964388	0.607379	ENSG00000150782,ENSG00000114554,ENSG00000171617,ENSG00000185352,ENSG00000004799,ENSG00000184613,ENSG00000119397,ENSG00000137642,ENSG00000109099,ENSG00000148541,ENSG00000005020,ENSG00000196730,ENSG00000122483,ENSG00000151348,ENSG00000177301,ENSG00000183049,ENSG00000198034,ENSG00000156482,ENSG00000008988,ENSG00000171819,ENSG00000080503,ENSG00000177575,ENSG00000143110,ENSG00000196876,ENSG00000151322…
F23	Oligodendrocyte	12106	295	2211	53.8778	52	0.965147	0.956659	0.636545	ENSG00000146083,ENSG00000075340,ENSG00000185352,ENSG00000197965,ENSG00000111110,ENSG00000158008,ENSG00000121864,ENSG00000168036,ENSG00000163399,ENSG00000155657,ENSG00000163788,ENSG00000119397,ENSG00000157680,ENSG00000109099,ENSG00000160145,ENSG00000145730,ENSG00000170091,ENSG00000148541,ENSG00000005020,ENSG00000196730,ENSG00000120699,ENSG00000006831,ENSG00000075975,ENSG00000197694,ENSG00000196361…
F23	Neuron	12106	295	5889	143.504	136	0.947711	0.900708	0.827366	ENSG00000146083,ENSG00000162706,ENSG00000120899,ENSG00000150782,ENSG00000114554,ENSG00000171617,ENSG00000075340,ENSG00000164715,ENSG00000185352,ENSG00000168906,ENSG00000114446,ENSG00000106624,ENSG00000111110,ENSG00000119283,ENSG00000082458,ENSG00000170581,ENSG00000004799,ENSG00000182013,ENSG00000152520,ENSG00000106537,ENSG00000168036,ENSG00000163399,ENSG00000184613,ENSG00000155657,ENSG00000163788…
F23	Endothelia	12106	295	1694	41.2795	50	1.21125	1.26208	0.0837121	ENSG00000150782,ENSG00000171617,ENSG00000185352,ENSG00000197965,ENSG00000119283,ENSG00000004799,ENSG00000007001,ENSG00000168036,ENSG00000137642,ENSG00000110786,ENSG00000160145,ENSG00000145730,ENSG00000170091,ENSG00000127249,ENSG00000183688,ENSG00000154330,ENSG00000198034,ENSG00000134115,ENSG00000156482,ENSG00000008988,ENSG00000173706,ENSG00000065526,ENSG00000011465,ENSG00000134775,ENSG00000151689…
F24	Astrocyte	12106	250	1714	35.3957	45	1.27134	1.33979	0.05089	ENSG00000080493,ENSG00000164035,ENSG00000197977,ENSG00000198964,ENSG00000244038,ENSG00000162618,ENSG00000198886,ENSG00000135919,ENSG00000143248,ENSG00000086061,ENSG00000163285,ENSG00000069122,ENSG00000152583,ENSG00000133318,ENSG00000117632,ENSG00000176386,ENSG00000070778,ENSG00000152527,ENSG00000100577,ENSG00000146072,ENSG00000166265,ENSG00000101938,ENSG00000214575,ENSG00000136111,ENSG00000103257…
F24	Microglia	12106	250	1566	32.3393	17	0.525676	0.485507	0.999439	ENSG00000169313,ENSG00000135919,ENSG00000183780,ENSG00000171659,ENSG00000179331,ENSG00000136732,ENSG00000147454,ENSG00000124782,ENSG00000189050,ENSG00000187398,ENSG00000135052,ENSG00000187796,ENSG00000043462,ENSG00000100462,ENSG00000164056,ENSG00000129566,ENSG00000127528
F24	Oligodendrocyte	12106	250	2211	45.6592	35	0.766549	0.7242	0.970785	ENSG00000174943,ENSG00000169313,ENSG00000198804,ENSG00000135919,ENSG00000171793,ENSG00000167861,ENSG00000152583,ENSG00000133318,ENSG00000117632,ENSG00000131773,ENSG00000152527,ENSG00000179331,ENSG00000040341,ENSG00000146072,ENSG00000020426,ENSG00000101938,ENSG00000187398,ENSG00000111581,ENSG00000167699,ENSG00000139767,ENSG00000203760,ENSG00000197548,ENSG00000046889,ENSG00000179292,ENSG00000130816…
F24	Neuron	12106	250	5889	121.613	126	1.03607	1.07428	0.309497	ENSG00000174943,ENSG00000080493,ENSG00000064419,ENSG00000150753,ENSG00000006118,ENSG00000170633,ENSG00000115339,ENSG00000169313,ENSG00000198198,ENSG00000120256,ENSG00000197977,ENSG00000113971,ENSG00000104853,ENSG00000198964,ENSG00000127947,ENSG00000168092,ENSG00000176444,ENSG00000244038,ENSG00000115233,ENSG00000135919,ENSG00000167861,ENSG00000143248,ENSG00000167986,ENSG00000183780,ENSG00000143341…
F24	Endothelia	12106	250	1694	34.9827	46	1.31494	1.39668	0.0295787	ENSG00000080493,ENSG00000164035,ENSG00000006118,ENSG00000197977,ENSG00000198964,ENSG00000162618,ENSG00000198886,ENSG00000163492,ENSG00000135919,ENSG00000143248,ENSG00000143341,ENSG00000086061,ENSG00000163285,ENSG00000069122,ENSG00000122008,ENSG00000152583,ENSG00000133318,ENSG00000179348,ENSG00000131773,ENSG00000152527,ENSG00000100577,ENSG00000145246,ENSG00000166265,ENSG00000101938,ENSG00000214575…
F25	Astrocyte	12106	186	1714	26.3344	24	0.911356	0.896756	0.720633	ENSG00000115760,ENSG00000145362,ENSG00000116729,ENSG00000167526,ENSG00000185565,ENSG00000189171,ENSG00000134121,ENSG00000141030,ENSG00000105193,ENSG00000170889,ENSG00000134369,ENSG00000005810,ENSG00000140386,ENSG00000168081,ENSG00000127418,ENSG00000182168,ENSG00000104213,ENSG00000187391,ENSG00000108298,ENSG00000135446,ENSG00000178184,ENSG00000100354,ENSG00000104823,ENSG00000106484
F25	Microglia	12106	186	1566	24.0605	23	0.955925	0.948954	0.625463	ENSG00000120594,ENSG00000197872,ENSG00000187240,ENSG00000185565,ENSG00000113441,ENSG00000083123,ENSG00000100410,ENSG00000105193,ENSG00000197756,ENSG00000111602,ENSG00000123349,ENSG00000218336,ENSG00000087263,ENSG00000091137,ENSG00000182168,ENSG00000165194,ENSG00000010704,ENSG00000137193,ENSG00000187391,ENSG00000102468,ENSG00000177570,ENSG00000185046,ENSG00000198046
F25	Oligodendrocyte	12106	186	2211	33.9704	35	1.03031	1.03793	0.451969	ENSG00000090097,ENSG00000138688,ENSG00000116539,ENSG00000120594,ENSG00000197872,ENSG00000145362,ENSG00000144935,ENSG00000167526,ENSG00000185565,ENSG00000023516,ENSG00000189171,ENSG00000137968,ENSG00000118200,ENSG00000134121,ENSG00000066777,ENSG00000197756,ENSG00000111602,ENSG00000138246,ENSG00000134369,ENSG00000218336,ENSG00000005810,ENSG00000140386,ENSG00000162073,ENSG00000185043,ENSG00000154803…
F25	Neuron	12106	186	5889	90.4803	93	1.02785	1.05661	0.382442	ENSG00000166326,ENSG00000090097,ENSG00000163001,ENSG00000204217,ENSG00000115464,ENSG00000138688,ENSG00000117523,ENSG00000152061,ENSG00000115760,ENSG00000120594,ENSG00000038219,ENSG00000197872,ENSG00000145362,ENSG00000115419,ENSG00000187240,ENSG00000116729,ENSG00000144935,ENSG00000155287,ENSG00000135049,ENSG00000167526,ENSG00000185565,ENSG00000023516,ENSG00000102038,ENSG00000010404,ENSG00000173653…
F25	Endothelia	12106	186	1694	26.0271	17	0.653166	0.614429	0.983201	ENSG00000115760,ENSG00000145362,ENSG00000116729,ENSG00000185565,ENSG00000189171,ENSG00000145198,ENSG00000134121,ENSG00000141030,ENSG00000105193,ENSG00000197756,ENSG00000134369,ENSG00000168081,ENSG00000102452,ENSG00000187391,ENSG00000108107,ENSG00000177570,ENSG00000213203
F26	Astrocyte	12106	85	1714	12.0345	19	1.57879	1.75367	0.0268114	ENSG00000164258,ENSG00000168710,ENSG00000148303,ENSG00000165029,ENSG00000198682,ENSG00000177283,ENSG00000031081,ENSG00000119866,ENSG00000096092,ENSG00000111229,ENSG00000137962,ENSG00000103160,ENSG00000073331,ENSG00000100902,ENSG00000184009,ENSG00000154930,ENSG00000141522,ENSG00000143995,ENSG00000171552
F26	Microglia	12106	85	1566	10.9954	9	0.818526	0.795877	0.786912	ENSG00000148303,ENSG00000165029,ENSG00000187122,ENSG00000171735,ENSG00000073331,ENSG00000166317,ENSG00000184009,ENSG00000185787,ENSG00000140470
F26	Oligodendrocyte	12106	85	2211	15.5241	14	0.901822	0.881724	0.708704	ENSG00000170448,ENSG00000168710,ENSG00000159685,ENSG00000165029,ENSG00000110442,ENSG00000170802,ENSG00000171530,ENSG00000104140,ENSG00000148090,ENSG00000198892,ENSG00000171735,ENSG00000004848,ENSG00000184009,ENSG00000140470
F26	Neuron	12106	85	5889	41.3485	39	0.943202	0.89436	0.732159	ENSG00000143786,ENSG00000170448,ENSG00000073578,ENSG00000168710,ENSG00000159685,ENSG00000220205,ENSG00000213760,ENSG00000123643,ENSG00000168546,ENSG00000132676,ENSG00000165102,ENSG00000084710,ENSG00000008283,ENSG00000104140,ENSG00000177542,ENSG00000187122,ENSG00000119865,ENSG00000173915,ENSG00000119866,ENSG00000151694,ENSG00000198892,ENSG00000148400,ENSG00000111229,ENSG00000171735,ENSG00000004848…
F26	Endothelia	12106	85	1694	11.8941	11	0.924828	0.913077	0.657703	ENSG00000168710,ENSG00000165029,ENSG00000198682,ENSG00000084710,ENSG00000031081,ENSG00000119866,ENSG00000148400,ENSG00000111229,ENSG00000137962,ENSG00000184009,ENSG00000154930
F27	Astrocyte	12106	66	1714	9.34446	22	2.35434	3.05752	6.33751e-05	ENSG00000180263,ENSG00000106278,ENSG00000079215,ENSG00000152620,ENSG00000153208,ENSG00000213949,ENSG00000078902,ENSG00000162642,ENSG00000110436,ENSG00000177108,ENSG00000078018,ENSG00000115902,ENSG00000129244,ENSG00000168309,ENSG00000240184,ENSG00000138400,ENSG00000164330,ENSG00000184047,ENSG00000145741,ENSG00000174306,ENSG00000132669,ENSG00000124440
F27	Microglia	12106	66	1566	8.53758	11	1.28842	1.34851	0.228519	ENSG00000153208,ENSG00000078902,ENSG00000196664,ENSG00000078018,ENSG00000168309,ENSG00000240184,ENSG00000197943,ENSG00000166986,ENSG00000174004,ENSG00000132669,ENSG00000248905
F27	Oligodendrocyte	12106	66	2211	12.054	19	1.57624	1.81609	0.0241521	ENSG00000106278,ENSG00000079215,ENSG00000153208,ENSG00000114993,ENSG00000154380,ENSG00000196664,ENSG00000110436,ENSG00000078018,ENSG00000157388,ENSG00000125354,ENSG00000197943,ENSG00000184047,ENSG00000174004,ENSG00000035403,ENSG00000132669,ENSG00000076382,ENSG00000100297,ENSG00000121390,ENSG00000248905
F27	Neuron	12106	66	5889	32.1059	29	0.903261	0.826598	0.813262	ENSG00000106278,ENSG00000079215,ENSG00000163468,ENSG00000152620,ENSG00000153208,ENSG00000114993,ENSG00000154380,ENSG00000213949,ENSG00000078902,ENSG00000110436,ENSG00000177108,ENSG00000078018,ENSG00000115902,ENSG00000157388,ENSG00000129244,ENSG00000176087,ENSG00000168309,ENSG00000197943,ENSG00000121361,ENSG00000214160,ENSG00000054277,ENSG00000174306,ENSG00000174238,ENSG00000035403,ENSG00000132669…
F27	Endothelia	12106	66	1694	9.23542	20	2.16558	2.69215	0.00048189	ENSG00000180263,ENSG00000106278,ENSG00000079215,ENSG00000152620,ENSG00000153208,ENSG00000213949,ENSG00000162642,ENSG00000147113,ENSG00000110436,ENSG00000177108,ENSG00000164307,ENSG00000115902,ENSG00000129244,ENSG00000168309,ENSG00000121361,ENSG00000164330,ENSG00000174306,ENSG00000035403,ENSG00000132669,ENSG00000124440
F28	Astrocyte	12106	173	1714	24.4938	25	1.02067	1.02452	0.489233	ENSG00000172889,ENSG00000116809,ENSG00000113558,ENSG00000161016,ENSG00000132965,ENSG00000184588,ENSG00000115145,ENSG00000187601,ENSG00000135838,ENSG00000078674,ENSG00000132321,ENSG00000114859,ENSG00000109670,ENSG00000147586,ENSG00000132122,ENSG00000151914,ENSG00000117362,ENSG00000071967,ENSG00000149380,ENSG00000156218,ENSG00000091664,ENSG00000108375,ENSG00000123453,ENSG00000112787,ENSG00000146411
F28	Microglia	12106	173	1566	22.3788	20	0.893702	0.878291	0.739237	ENSG00000127022,ENSG00000075539,ENSG00000052795,ENSG00000171365,ENSG00000132965,ENSG00000170677,ENSG00000135838,ENSG00000081721,ENSG00000276231,ENSG00000151914,ENSG00000165959,ENSG00000106565,ENSG00000101096,ENSG00000080845,ENSG00000070495,ENSG00000183783,ENSG00000184205,ENSG00000080815,ENSG00000011304,ENSG00000025708
F28	Oligodendrocyte	12106	173	2211	31.5962	24	0.759586	0.717819	0.949739	ENSG00000176720,ENSG00000075539,ENSG00000102189,ENSG00000174953,ENSG00000184588,ENSG00000182010,ENSG00000187601,ENSG00000135838,ENSG00000031691,ENSG00000119403,ENSG00000132122,ENSG00000151914,ENSG00000165959,ENSG00000106565,ENSG00000012048,ENSG00000101096,ENSG00000143228,ENSG00000156218,ENSG00000091664,ENSG00000184205,ENSG00000243317,ENSG00000139218,ENSG00000080815,ENSG00000109084
F28	Neuron	12106	173	5889	84.1564	73	0.867433	0.767799	0.96321	ENSG00000196923,ENSG00000176720,ENSG00000164985,ENSG00000172889,ENSG00000158773,ENSG00000075539,ENSG00000168216,ENSG00000113558,ENSG00000161016,ENSG00000160404,ENSG00000102189,ENSG00000052795,ENSG00000073614,ENSG00000148384,ENSG00000206530,ENSG00000132965,ENSG00000184588,ENSG00000197653,ENSG00000170677,ENSG00000182010,ENSG00000145431,ENSG00000187601,ENSG00000094631,ENSG00000090539,ENSG00000166793…
F28	Endothelia	12106	173	1694	24.208	22	0.908791	0.894104	0.719318	ENSG00000172889,ENSG00000116809,ENSG00000127022,ENSG00000132965,ENSG00000184588,ENSG00000115145,ENSG00000135838,ENSG00000132405,ENSG00000276231,ENSG00000114859,ENSG00000109670,ENSG00000132122,ENSG00000151914,ENSG00000117362,ENSG00000071967,ENSG00000149380,ENSG00000145911,ENSG00000156218,ENSG00000177685,ENSG00000091664,ENSG00000123453,ENSG00000011304
F31	Astrocyte	12106	66	1714	9.34446	12	1.28418	1.34975	0.217346	ENSG00000151465,ENSG00000167081,ENSG00000166046,ENSG00000149257,ENSG00000120738,ENSG00000143870,ENSG00000182256,ENSG00000196505,ENSG00000100504,ENSG00000071127,ENSG00000162711,ENSG00000101222
F31	Microglia	12106	66	1566	8.53758	12	1.40555	1.49944	0.138891	ENSG00000019582,ENSG00000150337,ENSG00000120738,ENSG00000130300,ENSG00000116830,ENSG00000182256,ENSG00000134245,ENSG00000163162,ENSG00000100504,ENSG00000077238,ENSG00000162711,ENSG00000171777
F31	Oligodendrocyte	12106	66	2211	12.054	10	0.829599	0.798272	0.789465	ENSG00000167081,ENSG00000166881,ENSG00000120738,ENSG00000168724,ENSG00000182256,ENSG00000163162,ENSG00000165349,ENSG00000162711,ENSG00000174417,ENSG00000058600
F31	Neuron	12106	66	5889	32.1059	28	0.872114	0.776839	0.872468	ENSG00000151743,ENSG00000151465,ENSG00000019582,ENSG00000161682,ENSG00000150337,ENSG00000118507,ENSG00000149257,ENSG00000168899,ENSG00000120738,ENSG00000174151,ENSG00000143870,ENSG00000112658,ENSG00000168724,ENSG00000182256,ENSG00000160293,ENSG00000189077,ENSG00000163162,ENSG00000106771,ENSG00000071127,ENSG00000077238,ENSG00000165349,ENSG00000116141,ENSG00000156860,ENSG00000153879,ENSG00000167470…
F31	Endothelia	12106	66	1694	9.23542	14	1.5159	1.66017	0.0701382	ENSG00000151465,ENSG00000019582,ENSG00000167081,ENSG00000149257,ENSG00000168899,ENSG00000120738,ENSG00000143870,ENSG00000182256,ENSG00000196505,ENSG00000164294,ENSG00000110400,ENSG00000162711,ENSG00000167470,ENSG00000174417
F32	Astrocyte	12106	74	1714	10.4771	3	0.286338	0.254897	0.998951	ENSG00000165168,ENSG00000213719,ENSG00000131044
F32	Microglia	12106	74	1566	9.57244	6	0.626799	0.59233	0.92954	ENSG00000165168,ENSG00000213719,ENSG00000151117,ENSG00000123689,ENSG00000134996,ENSG00000157087
F32	Oligodendrocyte	12106	74	2211	13.5151	7	0.517939	0.465912	0.98838	ENSG00000115353,ENSG00000049089,ENSG00000151117,ENSG00000103174,ENSG00000111247,ENSG00000108679,ENSG00000119121
F32	Neuron	12106	74	5889	35.9975	25	0.694492	0.536683	0.996619	ENSG00000122257,ENSG00000115353,ENSG00000049089,ENSG00000171792,ENSG00000165168,ENSG00000111860,ENSG00000213719,ENSG00000234616,ENSG00000163743,ENSG00000138771,ENSG00000137692,ENSG00000164983,ENSG00000134996,ENSG00000131652,ENSG00000176853,ENSG00000109270,ENSG00000182492,ENSG00000157087,ENSG00000145907,ENSG00000136758,ENSG00000269964,ENSG00000181035,ENSG00000108679,ENSG00000167291,ENSG00000089091
F32	Endothelia	12106	74	1694	10.3549	6	0.579438	0.540726	0.95745	ENSG00000165168,ENSG00000111860,ENSG00000175183,ENSG00000188215,ENSG00000134996,ENSG00000182492
F33	Astrocyte	12106	63	1714	8.91971	8	0.89689	0.881374	0.684827	ENSG00000260314,ENSG00000144868,ENSG00000110799,ENSG00000101680,ENSG00000147604,ENSG00000247746,ENSG00000187720,ENSG00000157227
F33	Microglia	12106	63	1566	8.14951	10	1.22707	1.27162	0.293843	ENSG00000106078,ENSG00000260314,ENSG00000144868,ENSG00000138119,ENSG00000100968,ENSG00000188906,ENSG00000173083,ENSG00000142552,ENSG00000169508,ENSG00000157227
F33	Oligodendrocyte	12106	63	2211	11.5061	10	0.869103	0.843711	0.737414	ENSG00000260314,ENSG00000144868,ENSG00000110799,ENSG00000138119,ENSG00000188906,ENSG00000164619,ENSG00000151725,ENSG00000147604,ENSG00000188158,ENSG00000168675
F33	Neuron	12106	63	5889	30.6465	24	0.783123	0.648252	0.965175	ENSG00000106078,ENSG00000141433,ENSG00000144868,ENSG00000110799,ENSG00000172534,ENSG00000110911,ENSG00000152484,ENSG00000178149,ENSG00000091879,ENSG00000188906,ENSG00000106028,ENSG00000162738,ENSG00000164619,ENSG00000151725,ENSG00000147604,ENSG00000155858,ENSG00000187720,ENSG00000151338,ENSG00000168675,ENSG00000169508,ENSG00000100425,ENSG00000123901,ENSG00000139645,ENSG00000127526
F33	Endothelia	12106	63	1694	8.81563	11	1.24778	1.30213	0.261016	ENSG00000260314,ENSG00000144868,ENSG00000110799,ENSG00000138119,ENSG00000133392,ENSG00000091879,ENSG00000107796,ENSG00000177076,ENSG00000187720,ENSG00000168675,ENSG00000157227
F34	Astrocyte	12106	95	1714	13.4504	12	0.89217	0.875741	0.709574	ENSG00000170915,ENSG00000166033,ENSG00000174628,ENSG00000165533,ENSG00000109472,ENSG00000107249,ENSG00000105854,ENSG00000205323,ENSG00000178585,ENSG00000129219,ENSG00000134569,ENSG00000130304
F34	Microglia	12106	95	1566	12.2889	8	0.650991	0.616963	0.936529	ENSG00000049860,ENSG00000144381,ENSG00000188921,ENSG00000109472,ENSG00000095303,ENSG00000150760,ENSG00000082074,ENSG00000114988
F34	Oligodendrocyte	12106	95	2211	17.3505	8	0.461082	0.409408	0.997879	ENSG00000115525,ENSG00000066923,ENSG00000153317,ENSG00000116132,ENSG00000185950,ENSG00000164512,ENSG00000105854,ENSG00000088325
F34	Neuron	12106	95	5889	46.213	40	0.865557	0.76621	0.91703	ENSG00000163093,ENSG00000049860,ENSG00000170915,ENSG00000144381,ENSG00000163624,ENSG00000152795,ENSG00000115525,ENSG00000166033,ENSG00000070159,ENSG00000066923,ENSG00000153317,ENSG00000174628,ENSG00000138303,ENSG00000185950,ENSG00000163297,ENSG00000125386,ENSG00000109472,ENSG00000164512,ENSG00000214338,ENSG00000158089,ENSG00000107249,ENSG00000146909,ENSG00000143727,ENSG00000105854,ENSG00000172992…
F34	Endothelia	12106	95	1694	13.2934	12	0.902703	0.88788	0.693703	ENSG00000170915,ENSG00000115525,ENSG00000140092,ENSG00000166033,ENSG00000109472,ENSG00000107249,ENSG00000150760,ENSG00000105854,ENSG00000205323,ENSG00000129219,ENSG00000134569,ENSG00000130304
F37	Astrocyte	12106	109	1714	15.4325	25	1.61996	1.81626	0.00891323	ENSG00000177556,ENSG00000143603,ENSG00000080298,ENSG00000142634,ENSG00000148053,ENSG00000178904,ENSG00000143171,ENSG00000171310,ENSG00000004838,ENSG00000090266,ENSG00000047662,ENSG00000116299,ENSG00000134317,ENSG00000162849,ENSG00000186635,ENSG00000185942,ENSG00000147155,ENSG00000175899,ENSG00000176101,ENSG00000089009,ENSG00000123243,ENSG00000156795,ENSG00000100234,ENSG00000083845,ENSG00000172239
F37	Microglia	12106	109	1566	14.1	17	1.20568	1.24633	0.239929	ENSG00000143603,ENSG00000080298,ENSG00000198722,ENSG00000164733,ENSG00000114784,ENSG00000142634,ENSG00000143171,ENSG00000171310,ENSG00000198589,ENSG00000123353,ENSG00000187957,ENSG00000107186,ENSG00000175899,ENSG00000165458,ENSG00000108352,ENSG00000179583,ENSG00000083845
F37	Oligodendrocyte	12106	109	2211	19.9074	21	1.05488	1.06864	0.431384	ENSG00000080298,ENSG00000168993,ENSG00000175161,ENSG00000182985,ENSG00000148053,ENSG00000171310,ENSG00000187957,ENSG00000090266,ENSG00000065665,ENSG00000053372,ENSG00000134317,ENSG00000162849,ENSG00000185942,ENSG00000147155,ENSG00000184903,ENSG00000106397,ENSG00000058272,ENSG00000165458,ENSG00000164104,ENSG00000141404,ENSG00000179455
F37	Neuron	12106	109	5889	53.0234	63	1.18816	1.45061	0.0339637	ENSG00000177556,ENSG00000143067,ENSG00000080298,ENSG00000198722,ENSG00000164733,ENSG00000168993,ENSG00000106628,ENSG00000175161,ENSG00000143156,ENSG00000114784,ENSG00000182985,ENSG00000174705,ENSG00000139117,ENSG00000197321,ENSG00000148053,ENSG00000006071,ENSG00000180155,ENSG00000171310,ENSG00000010295,ENSG00000123353,ENSG00000148943,ENSG00000106683,ENSG00000187957,ENSG00000090266,ENSG00000047662…
F37	Endothelia	12106	109	1694	15.2524	21	1.37683	1.47255	0.0769852	ENSG00000143603,ENSG00000177098,ENSG00000197321,ENSG00000148053,ENSG00000178904,ENSG00000143171,ENSG00000171310,ENSG00000090266,ENSG00000116299,ENSG00000156925,ENSG00000134317,ENSG00000185942,ENSG00000184903,ENSG00000163171,ENSG00000175899,ENSG00000058272,ENSG00000123243,ENSG00000165458,ENSG00000102804,ENSG00000100234,ENSG00000083845
F39	Astrocyte	12106	70	1714	9.91079	15	1.5135	1.65923	0.0629194	ENSG00000150672,ENSG00000127603,ENSG00000135540,ENSG00000115112,ENSG00000168918,ENSG00000144749,ENSG00000162688,ENSG00000225697,ENSG00000162687,ENSG00000144730,ENSG00000164930,ENSG00000163629,ENSG00000183579,ENSG00000107937,ENSG00000134516
F39	Microglia	12106	70	1566	9.05501	13	1.43567	1.53944	0.112305	ENSG00000150672,ENSG00000115112,ENSG00000125810,ENSG00000170296,ENSG00000173320,ENSG00000168918,ENSG00000109819,ENSG00000168032,ENSG00000158352,ENSG00000105122,ENSG00000163629,ENSG00000101336,ENSG00000134516
F39	Oligodendrocyte	12106	70	2211	12.7846	16	1.25151	1.32837	0.196987	ENSG00000144406,ENSG00000150672,ENSG00000244187,ENSG00000170296,ENSG00000140526,ENSG00000174473,ENSG00000162687,ENSG00000165061,ENSG00000168032,ENSG00000158352,ENSG00000014138,ENSG00000105122,ENSG00000050820,ENSG00000163629,ENSG00000151917,ENSG00000134516
F39	Neuron	12106	70	5889	34.0517	38	1.11595	1.25526	0.204115	ENSG00000144406,ENSG00000150672,ENSG00000107821,ENSG00000127603,ENSG00000135540,ENSG00000244187,ENSG00000126247,ENSG00000169507,ENSG00000138036,ENSG00000179859,ENSG00000186416,ENSG00000125810,ENSG00000170296,ENSG00000173320,ENSG00000168918,ENSG00000144749,ENSG00000140526,ENSG00000198382,ENSG00000115484,ENSG00000162688,ENSG00000168280,ENSG00000225697,ENSG00000174473,ENSG00000162687,ENSG00000158467…
F39	Endothelia	12106	70	1694	9.79514	17	1.73555	1.98126	0.0145525	ENSG00000127603,ENSG00000135540,ENSG00000169507,ENSG00000125810,ENSG00000168918,ENSG00000144749,ENSG00000140526,ENSG00000166025,ENSG00000129467,ENSG00000174473,ENSG00000162687,ENSG00000144730,ENSG00000164930,ENSG00000163629,ENSG00000134986,ENSG00000107937,ENSG00000134516
F40	Astrocyte	12106	62	1714	8.77813	7	0.797437	0.770735	0.793558	ENSG00000112186,ENSG00000127884,ENSG00000133065,ENSG00000169047,ENSG00000196074,ENSG00000142347,ENSG00000077942
F40	Microglia	12106	62	1566	8.02016	11	1.37154	1.45482	0.17142	ENSG00000162631,ENSG00000070961,ENSG00000164484,ENSG00000177103,ENSG00000183454,ENSG00000134070,ENSG00000111052,ENSG00000139679,ENSG00000241973,ENSG00000142347,ENSG00000119608
F40	Oligodendrocyte	12106	62	2211	11.3235	14	1.23637	1.30722	0.231447	ENSG00000075151,ENSG00000133597,ENSG00000162631,ENSG00000070961,ENSG00000150768,ENSG00000112186,ENSG00000140015,ENSG00000127884,ENSG00000177103,ENSG00000183454,ENSG00000187741,ENSG00000134070,ENSG00000111052,ENSG00000142347
F40	Neuron	12106	62	5889	30.1601	34	1.12732	1.28352	0.197436	ENSG00000075151,ENSG00000163913,ENSG00000133597,ENSG00000146067,ENSG00000162631,ENSG00000175115,ENSG00000070961,ENSG00000130559,ENSG00000132275,ENSG00000164794,ENSG00000150768,ENSG00000112186,ENSG00000008056,ENSG00000158526,ENSG00000149260,ENSG00000140015,ENSG00000163785,ENSG00000169047,ENSG00000177103,ENSG00000102572,ENSG00000146147,ENSG00000163864,ENSG00000119682,ENSG00000183454,ENSG00000178235…
F40	Endothelia	12106	62	1694	8.6757	4	0.461058	0.422547	0.980663	ENSG00000133065,ENSG00000169047,ENSG00000139679,ENSG00000142347
F41	Astrocyte	12106	80	1714	11.3266	14	1.23603	1.28842	0.236111	ENSG00000154975,ENSG00000110427,ENSG00000115306,ENSG00000145934,ENSG00000149212,ENSG00000165323,ENSG00000156011,ENSG00000132872,ENSG00000106780,ENSG00000083067,ENSG00000175198,ENSG00000091129,ENSG00000054654,ENSG00000108395
F41	Microglia	12106	80	1566	10.3486	16	1.5461	1.68958	0.0485379	ENSG00000081189,ENSG00000149177,ENSG00000196950,ENSG00000175497,ENSG00000198162,ENSG00000152894,ENSG00000174136,ENSG00000185760,ENSG00000156011,ENSG00000120868,ENSG00000100647,ENSG00000136040,ENSG00000185742,ENSG00000083067,ENSG00000185900,ENSG00000154258
F41	Oligodendrocyte	12106	80	2211	14.6109	25	1.71105	2.04599	0.0034076	ENSG00000164114,ENSG00000081189,ENSG00000143473,ENSG00000149177,ENSG00000154975,ENSG00000178104,ENSG00000153956,ENSG00000175497,ENSG00000198162,ENSG00000048052,ENSG00000152894,ENSG00000145934,ENSG00000165323,ENSG00000147481,ENSG00000185760,ENSG00000122644,ENSG00000132872,ENSG00000103227,ENSG00000083067,ENSG00000091129,ENSG00000150394,ENSG00000145451,ENSG00000054654,ENSG00000062822,ENSG00000108395
F41	Neuron	12106	80	5889	38.9162	59	1.51608	2.98565	3.99696e-06	ENSG00000164114,ENSG00000081189,ENSG00000162694,ENSG00000143473,ENSG00000154478,ENSG00000149177,ENSG00000150712,ENSG00000154975,ENSG00000110427,ENSG00000116106,ENSG00000196950,ENSG00000131089,ENSG00000178104,ENSG00000153956,ENSG00000168438,ENSG00000175497,ENSG00000198162,ENSG00000048052,ENSG00000152894,ENSG00000115306,ENSG00000145934,ENSG00000174136,ENSG00000180801,ENSG00000149212,ENSG00000165323…
F41	Endothelia	12106	80	1694	11.1944	17	1.51861	1.66514	0.0487842	ENSG00000149177,ENSG00000110427,ENSG00000196950,ENSG00000152894,ENSG00000115306,ENSG00000145934,ENSG00000165323,ENSG00000156011,ENSG00000122644,ENSG00000132872,ENSG00000106780,ENSG00000083067,ENSG00000175198,ENSG00000091129,ENSG00000147100,ENSG00000054654,ENSG00000108395
F42	Astrocyte	12106	76	1714	10.7603	9	0.836409	0.813468	0.766781	ENSG00000138587,ENSG00000159388,ENSG00000214114,ENSG00000111321,ENSG00000170345,ENSG00000078295,ENSG00000166710,ENSG00000187049,ENSG00000141698
F42	Microglia	12106	76	1566	9.83116	11	1.11889	1.13996	0.394004	ENSG00000159388,ENSG00000164506,ENSG00000138030,ENSG00000170345,ENSG00000101294,ENSG00000003096,ENSG00000125740,ENSG00000078295,ENSG00000240065,ENSG00000138670,ENSG00000103496
F42	Oligodendrocyte	12106	76	2211	13.8804	17	1.22475	1.29172	0.214004	ENSG00000138587,ENSG00000159388,ENSG00000164506,ENSG00000142731,ENSG00000092470,ENSG00000070882,ENSG00000104375,ENSG00000170345,ENSG00000125740,ENSG00000035928,ENSG00000138670,ENSG00000180998,ENSG00000159200,ENSG00000166710,ENSG00000136155,ENSG00000103496,ENSG00000156642
F42	Neuron	12106	76	5889	36.9704	31	0.838508	0.725836	0.932267	ENSG00000159388,ENSG00000048392,ENSG00000164506,ENSG00000148339,ENSG00000196182,ENSG00000138073,ENSG00000070882,ENSG00000152785,ENSG00000113318,ENSG00000170345,ENSG00000101294,ENSG00000003096,ENSG00000019485,ENSG00000165138,ENSG00000084090,ENSG00000125740,ENSG00000140564,ENSG00000179918,ENSG00000088543,ENSG00000221988,ENSG00000174106,ENSG00000078295,ENSG00000180773,ENSG00000138670,ENSG00000180998…
F42	Endothelia	12106	76	1694	10.6347	7	0.658221	0.622007	0.921803	ENSG00000159388,ENSG00000111321,ENSG00000104375,ENSG00000170345,ENSG00000078295,ENSG00000166710,ENSG00000156642
F43	Astrocyte	12106	98	1714	13.8751	17	1.22522	1.27518	0.218205	ENSG00000137154,ENSG00000157020,ENSG00000106261,ENSG00000164651,ENSG00000084676,ENSG00000183117,ENSG00000171612,ENSG00000134376,ENSG00000147044,ENSG00000162692,ENSG00000135424,ENSG00000111885,ENSG00000065057,ENSG00000138764,ENSG00000101160,ENSG00000080573,ENSG00000112981
F43	Microglia	12106	98	1566	12.677	11	0.867712	0.849962	0.737742	ENSG00000171385,ENSG00000204472,ENSG00000183117,ENSG00000134376,ENSG00000090013,ENSG00000145416,ENSG00000135424,ENSG00000173406,ENSG00000185614,ENSG00000197580,ENSG00000101160
F43	Oligodendrocyte	12106	98	2211	17.8984	22	1.22916	1.29844	0.171261	ENSG00000137154,ENSG00000171385,ENSG00000106261,ENSG00000180198,ENSG00000177565,ENSG00000160050,ENSG00000179915,ENSG00000168393,ENSG00000078124,ENSG00000183117,ENSG00000134376,ENSG00000151422,ENSG00000145416,ENSG00000170456,ENSG00000147044,ENSG00000149547,ENSG00000111885,ENSG00000173406,ENSG00000151692,ENSG00000065600,ENSG00000140365,ENSG00000101333
F43	Neuron	12106	98	5889	47.6724	55	1.15371	1.35357	0.0829137	ENSG00000137154,ENSG00000171385,ENSG00000157020,ENSG00000143537,ENSG00000177565,ENSG00000164651,ENSG00000179915,ENSG00000168393,ENSG00000078124,ENSG00000084676,ENSG00000204472,ENSG00000183117,ENSG00000135655,ENSG00000196976,ENSG00000109158,ENSG00000114861,ENSG00000134376,ENSG00000115232,ENSG00000164128,ENSG00000144357,ENSG00000090013,ENSG00000082146,ENSG00000145416,ENSG00000170456,ENSG00000164221…
F43	Endothelia	12106	98	1694	13.7132	15	1.09384	1.11181	0.39642	ENSG00000106261,ENSG00000164651,ENSG00000084676,ENSG00000107816,ENSG00000114861,ENSG00000134376,ENSG00000147044,ENSG00000162692,ENSG00000135424,ENSG00000111885,ENSG00000146674,ENSG00000138764,ENSG00000185614,ENSG00000101160,ENSG00000080573
F44	Astrocyte	12106	58	1714	8.2118	10	1.21776	1.26464	0.301477	ENSG00000151834,ENSG00000155090,ENSG00000090520,ENSG00000244405,ENSG00000116717,ENSG00000107863,ENSG00000166598,ENSG00000126016,ENSG00000128805,ENSG00000126803
F44	Microglia	12106	58	1566	7.50273	8	1.06628	1.0773	0.480954	ENSG00000160932,ENSG00000244405,ENSG00000138814,ENSG00000181804,ENSG00000107863,ENSG00000128805,ENSG00000112232,ENSG00000077420
F44	Oligodendrocyte	12106	58	2211	10.5929	14	1.32164	1.42663	0.160399	ENSG00000185736,ENSG00000085999,ENSG00000132196,ENSG00000049130,ENSG00000138814,ENSG00000181804,ENSG00000107863,ENSG00000166598,ENSG00000169908,ENSG00000126803,ENSG00000180730,ENSG00000011638,ENSG00000112232,ENSG00000077420
F44	Neuron	12106	58	5889	28.2143	23	0.81519	0.692566	0.934355	ENSG00000151834,ENSG00000135766,ENSG00000155090,ENSG00000107338,ENSG00000160957,ENSG00000185736,ENSG00000183508,ENSG00000125952,ENSG00000090520,ENSG00000160932,ENSG00000244405,ENSG00000132196,ENSG00000049130,ENSG00000138814,ENSG00000070614,ENSG00000107863,ENSG00000166598,ENSG00000065989,ENSG00000180730,ENSG00000121073,ENSG00000197070,ENSG00000139684,ENSG00000112232
F44	Endothelia	12106	58	1694	8.11598	11	1.35535	1.44133	0.180209	ENSG00000151834,ENSG00000155090,ENSG00000090520,ENSG00000160932,ENSG00000049130,ENSG00000116717,ENSG00000107863,ENSG00000166598,ENSG00000126016,ENSG00000169908,ENSG00000128805
F45	Astrocyte	12106	72	1714	10.194	8	0.784779	0.756757	0.818002	ENSG00000069702,ENSG00000124491,ENSG00000162733,ENSG00000152932,ENSG00000138061,ENSG00000102054,ENSG00000132128,ENSG00000140497
F45	Microglia	12106	72	1566	9.31373	17	1.82526	2.09205	0.00913988	ENSG00000198797,ENSG00000174482,ENSG00000165379,ENSG00000151067,ENSG00000124491,ENSG00000164124,ENSG00000183662,ENSG00000131941,ENSG00000153071,ENSG00000168297,ENSG00000102054,ENSG00000188153,ENSG00000010327,ENSG00000111817,ENSG00000113273,ENSG00000125844,ENSG00000140497
F45	Oligodendrocyte	12106	72	2211	13.1498	15	1.1407	1.17888	0.330239	ENSG00000198797,ENSG00000174482,ENSG00000165379,ENSG00000151067,ENSG00000164124,ENSG00000145147,ENSG00000152932,ENSG00000169855,ENSG00000168297,ENSG00000104859,ENSG00000188153,ENSG00000010327,ENSG00000125844,ENSG00000126215,ENSG00000165495
F45	Neuron	12106	72	5889	35.0246	36	1.02785	1.05606	0.454879	ENSG00000111907,ENSG00000198797,ENSG00000206418,ENSG00000164692,ENSG00000110723,ENSG00000165118,ENSG00000174482,ENSG00000165379,ENSG00000143061,ENSG00000151067,ENSG00000124491,ENSG00000091136,ENSG00000145147,ENSG00000108821,ENSG00000153071,ENSG00000152932,ENSG00000169855,ENSG00000139329,ENSG00000119772,ENSG00000168297,ENSG00000125945,ENSG00000060688,ENSG00000122778,ENSG00000142949,ENSG00000138622…
F45	Endothelia	12106	72	1694	10.075	11	1.09181	1.1091	0.426816	ENSG00000164692,ENSG00000124491,ENSG00000091136,ENSG00000145147,ENSG00000162733,ENSG00000152932,ENSG00000138061,ENSG00000010327,ENSG00000125844,ENSG00000140497,ENSG00000103196
F46	Astrocyte	12106	63	1714	8.91971	6	0.672668	0.636962	0.898056	ENSG00000068697,ENSG00000153037,ENSG00000115556,ENSG00000118680,ENSG00000160188,ENSG00000105968
F46	Microglia	12106	63	1566	8.14951	3	0.36812	0.335273	0.991451	ENSG00000131697,ENSG00000066294,ENSG00000196814
F46	Oligodendrocyte	12106	63	2211	11.5061	10	0.869103	0.843711	0.737414	ENSG00000127564,ENSG00000068697,ENSG00000116525,ENSG00000188811,ENSG00000084754,ENSG00000123219,ENSG00000120334,ENSG00000196814,ENSG00000104368,ENSG00000167325
F46	Neuron	12106	63	5889	30.6465	15	0.489452	0.328191	0.999986	ENSG00000151882,ENSG00000131697,ENSG00000085491,ENSG00000116525,ENSG00000123219,ENSG00000066294,ENSG00000067704,ENSG00000196814,ENSG00000158109,ENSG00000188010,ENSG00000068383,ENSG00000159111,ENSG00000100242,ENSG00000166140,ENSG00000161671
F46	Endothelia	12106	63	1694	8.81563	7	0.794044	0.767354	0.796978	ENSG00000123609,ENSG00000153037,ENSG00000115556,ENSG00000118680,ENSG00000109610,ENSG00000104368,ENSG00000105968
F64	Astrocyte	12106	2064	1714	292.227	271	0.927362	0.900689	0.934914	ENSG00000135905,ENSG00000164181,ENSG00000118322,ENSG00000113296,ENSG00000066468,ENSG00000114166,ENSG00000163697,ENSG00000189067,ENSG00000166086,ENSG00000196083,ENSG00000146535,ENSG00000010278,ENSG00000213366,ENSG00000132470,ENSG00000173786,ENSG00000184005,ENSG00000149292,ENSG00000159176,ENSG00000164161,ENSG00000167996,ENSG00000139737,ENSG00000153048,ENSG00000118523,ENSG00000104267,ENSG00000152822…
F64	Microglia	12106	2064	1566	266.994	351	1.31464	1.48857	2.6979e-09	ENSG00000019144,ENSG00000184144,ENSG00000172005,ENSG00000174607,ENSG00000011426,ENSG00000013297,ENSG00000187764,ENSG00000104419,ENSG00000143382,ENSG00000204655,ENSG00000054690,ENSG00000148180,ENSG00000007944,ENSG00000135926,ENSG00000197430,ENSG00000113369,ENSG00000057704,ENSG00000124920,ENSG00000064651,ENSG00000138593,ENSG00000187239,ENSG00000109458,ENSG00000118322,ENSG00000066468,ENSG00000158859…
F64	Oligodendrocyte	12106	2064	2211	376.962	619	1.64207	2.27354	4.54942e-47	ENSG00000019144,ENSG00000205116,ENSG00000184144,ENSG00000172005,ENSG00000123560,ENSG00000082996,ENSG00000197971,ENSG00000136541,ENSG00000134198,ENSG00000174607,ENSG00000102158,ENSG00000011426,ENSG00000013297,ENSG00000164076,ENSG00000166387,ENSG00000187764,ENSG00000104419,ENSG00000204655,ENSG00000054690,ENSG00000198835,ENSG00000126391,ENSG00000148180,ENSG00000099282,ENSG00000135926,ENSG00000135362…
F64	Neuron	12106	2064	5889	1004.04	1097	1.09259	1.24283	3.90314e-06	ENSG00000019144,ENSG00000184144,ENSG00000172005,ENSG00000197971,ENSG00000136541,ENSG00000174607,ENSG00000011426,ENSG00000013297,ENSG00000164076,ENSG00000104419,ENSG00000204655,ENSG00000172375,ENSG00000054690,ENSG00000007944,ENSG00000116473,ENSG00000170775,ENSG00000163013,ENSG00000135905,ENSG00000064651,ENSG00000066322,ENSG00000164303,ENSG00000156983,ENSG00000187239,ENSG00000131378,ENSG00000211584…
F64	Endothelia	12106	2064	1694	288.817	327	1.13221	1.19467	0.00473281	ENSG00000205116,ENSG00000123560,ENSG00000136541,ENSG00000134198,ENSG00000174607,ENSG00000148180,ENSG00000197430,ENSG00000135905,ENSG00000164181,ENSG00000179178,ENSG00000169504,ENSG00000118322,ENSG00000113296,ENSG00000066468,ENSG00000114166,ENSG00000163697,ENSG00000176381,ENSG00000108381,ENSG00000167641,ENSG00000166086,ENSG00000021300,ENSG00000166348,ENSG00000146535,ENSG00000138756,ENSG00000213366…
F65	Astrocyte	12106	740	1714	104.771	117	1.11672	1.14875	0.10208	ENSG00000108309,ENSG00000149294,ENSG00000047365,ENSG00000118733,ENSG00000175582,ENSG00000144908,ENSG00000137094,ENSG00000163453,ENSG00000107643,ENSG00000197122,ENSG00000196104,ENSG00000135363,ENSG00000131558,ENSG00000168702,ENSG00000118985,ENSG00000179431,ENSG00000262655,ENSG00000115808,ENSG00000116661,ENSG00000152377,ENSG00000128602,ENSG00000114646,ENSG00000170370,ENSG00000074964,ENSG00000162630…
F65	Microglia	12106	740	1566	95.7244	91	0.950645	0.940243	0.719902	ENSG00000033327,ENSG00000047365,ENSG00000159399,ENSG00000176171,ENSG00000197959,ENSG00000232593,ENSG00000068305,ENSG00000144908,ENSG00000173372,ENSG00000175471,ENSG00000109686,ENSG00000188580,ENSG00000197635,ENSG00000196104,ENSG00000180353,ENSG00000135363,ENSG00000151726,ENSG00000113269,ENSG00000262655,ENSG00000116455,ENSG00000182732,ENSG00000214595,ENSG00000072135,ENSG00000163755,ENSG00000171004…
F65	Oligodendrocyte	12106	740	2211	135.151	125	0.92489	0.904216	0.852423	ENSG00000061938,ENSG00000136842,ENSG00000143653,ENSG00000108582,ENSG00000149294,ENSG00000047365,ENSG00000018510,ENSG00000197959,ENSG00000068305,ENSG00000074211,ENSG00000175471,ENSG00000109686,ENSG00000188580,ENSG00000187098,ENSG00000196104,ENSG00000162545,ENSG00000131558,ENSG00000189058,ENSG00000106443,ENSG00000075292,ENSG00000168702,ENSG00000150995,ENSG00000118985,ENSG00000113269,ENSG00000116455…
F65	Neuron	12106	740	5889	359.975	385	1.06952	1.15503	0.0313533	ENSG00000167702,ENSG00000087152,ENSG00000163462,ENSG00000160408,ENSG00000110697,ENSG00000116544,ENSG00000061938,ENSG00000136842,ENSG00000154118,ENSG00000160469,ENSG00000108309,ENSG00000075790,ENSG00000127585,ENSG00000099864,ENSG00000108582,ENSG00000063245,ENSG00000033327,ENSG00000127220,ENSG00000167535,ENSG00000155265,ENSG00000036257,ENSG00000149294,ENSG00000047365,ENSG00000188419,ENSG00000018510…
F65	Endothelia	12106	740	1694	103.549	126	1.21682	1.28228	0.0093648	ENSG00000136842,ENSG00000108309,ENSG00000139567,ENSG00000149294,ENSG00000047365,ENSG00000118733,ENSG00000144908,ENSG00000074211,ENSG00000137094,ENSG00000188580,ENSG00000138069,ENSG00000163453,ENSG00000197635,ENSG00000112697,ENSG00000107643,ENSG00000196104,ENSG00000135363,ENSG00000129636,ENSG00000168702,ENSG00000132334,ENSG00000151726,ENSG00000118985,ENSG00000179431,ENSG00000113269,ENSG00000262655…
F66	Astrocyte	12106	57	1714	8.07021	5	0.619562	0.581784	0.921107	ENSG00000147853,ENSG00000204463,ENSG00000153904,ENSG00000124140,ENSG00000109046
F66	Microglia	12106	57	1566	7.37337	7	0.949363	0.942012	0.618218	ENSG00000130508,ENSG00000171603,ENSG00000153904,ENSG00000127946,ENSG00000152270,ENSG00000173198,ENSG00000109046
F66	Oligodendrocyte	12106	57	2211	10.4103	9	0.864529	0.838483	0.737228	ENSG00000051825,ENSG00000114120,ENSG00000061987,ENSG00000150093,ENSG00000160753,ENSG00000127946,ENSG00000152270,ENSG00000124140,ENSG00000109046
F66	Neuron	12106	57	5889	27.7278	33	1.19014	1.45407	0.1024	ENSG00000109436,ENSG00000166111,ENSG00000146802,ENSG00000001631,ENSG00000151923,ENSG00000130508,ENSG00000204463,ENSG00000114120,ENSG00000105568,ENSG00000171603,ENSG00000068323,ENSG00000163872,ENSG00000061987,ENSG00000168490,ENSG00000153904,ENSG00000143933,ENSG00000162769,ENSG00000163466,ENSG00000132821,ENSG00000160753,ENSG00000127946,ENSG00000152270,ENSG00000175931,ENSG00000181852,ENSG00000140632…
F66	Endothelia	12106	57	1694	7.97604	4	0.501502	0.462634	0.96717	ENSG00000204463,ENSG00000153904,ENSG00000124140,ENSG00000109046
F81	Astrocyte	12106	62	1714	8.77813	9	1.02528	1.02973	0.523059	ENSG00000167186,ENSG00000110321,ENSG00000148737,ENSG00000113658,ENSG00000132155,ENSG00000067560,ENSG00000172270,ENSG00000160216,ENSG00000099954
F81	Microglia	12106	62	1566	8.02016	4	0.498743	0.462823	0.967538	ENSG00000110321,ENSG00000001629,ENSG00000078304,ENSG00000169271
F81	Oligodendrocyte	12106	62	2211	11.3235	10	0.883121	0.860022	0.718279	ENSG00000148737,ENSG00000084733,ENSG00000001629,ENSG00000162607,ENSG00000147862,ENSG00000198171,ENSG00000214367,ENSG00000078304,ENSG00000100276,ENSG00000178691
F81	Neuron	12106	62	5889	30.1601	33	1.09416	1.20242	0.275488	ENSG00000068885,ENSG00000133878,ENSG00000106367,ENSG00000110321,ENSG00000148737,ENSG00000084733,ENSG00000097033,ENSG00000181790,ENSG00000167779,ENSG00000148341,ENSG00000001629,ENSG00000205356,ENSG00000132563,ENSG00000071189,ENSG00000174485,ENSG00000147862,ENSG00000107897,ENSG00000144485,ENSG00000086666,ENSG00000121741,ENSG00000132155,ENSG00000173744,ENSG00000067560,ENSG00000119771,ENSG00000002834…
F81	Endothelia	12106	62	1694	8.6757	8	0.922116	0.91014	0.653306	ENSG00000167186,ENSG00000110321,ENSG00000148737,ENSG00000001629,ENSG00000147862,ENSG00000067560,ENSG00000172270,ENSG00000160216
F82	Astrocyte	12106	78	1714	11.0434	5	0.452757	0.413585	0.990119	ENSG00000162599,ENSG00000178075,ENSG00000075142,ENSG00000141232,ENSG00000124212
F82	Microglia	12106	78	1566	10.0899	8	0.792874	0.768033	0.807235	ENSG00000153707,ENSG00000137710,ENSG00000080822,ENSG00000178075,ENSG00000163539,ENSG00000165209,ENSG00000176225,ENSG00000204103
F82	Oligodendrocyte	12106	78	2211	14.2457	14	0.982755	0.978848	0.575057	ENSG00000163328,ENSG00000153707,ENSG00000162599,ENSG00000137710,ENSG00000080822,ENSG00000165238,ENSG00000163539,ENSG00000126777,ENSG00000166963,ENSG00000206560,ENSG00000075142,ENSG00000168214,ENSG00000204103,ENSG00000176890
F82	Neuron	12106	78	5889	37.9433	49	1.2914	1.79024	0.00805124	ENSG00000174233,ENSG00000175662,ENSG00000163328,ENSG00000153707,ENSG00000162599,ENSG00000080822,ENSG00000121753,ENSG00000172932,ENSG00000080345,ENSG00000114209,ENSG00000126461,ENSG00000186908,ENSG00000130338,ENSG00000110497,ENSG00000165238,ENSG00000105429,ENSG00000168734,ENSG00000136861,ENSG00000073711,ENSG00000112406,ENSG00000163539,ENSG00000126777,ENSG00000174871,ENSG00000148634,ENSG00000088256…
F82	Endothelia	12106	78	1694	10.9146	9	0.824585	0.800659	0.7811	ENSG00000078747,ENSG00000162599,ENSG00000080822,ENSG00000178075,ENSG00000163539,ENSG00000132688,ENSG00000165209,ENSG00000075142,ENSG00000124212
F102	Astrocyte	12106	88	1714	12.4593	11	0.882876	0.865306	0.718126	ENSG00000127837,ENSG00000143797,ENSG00000162944,ENSG00000089693,ENSG00000175334,ENSG00000204116,ENSG00000139289,ENSG00000134333,ENSG00000101460,ENSG00000160888,ENSG00000088833
F102	Microglia	12106	88	1566	11.3834	7	0.614928	0.579794	0.948473	ENSG00000162944,ENSG00000108654,ENSG00000116649,ENSG00000173611,ENSG00000163106,ENSG00000101460,ENSG00000160888
F102	Oligodendrocyte	12106	88	2211	16.072	9	0.559979	0.507875	0.98706	ENSG00000145725,ENSG00000143797,ENSG00000106089,ENSG00000173611,ENSG00000092445,ENSG00000139289,ENSG00000146350,ENSG00000160888,ENSG00000157734
F102	Neuron	12106	88	5889	42.8079	44	1.02785	1.05614	0.440794	ENSG00000115524,ENSG00000115694,ENSG00000155545,ENSG00000172531,ENSG00000250510,ENSG00000143797,ENSG00000157107,ENSG00000162944,ENSG00000108654,ENSG00000147162,ENSG00000106089,ENSG00000173621,ENSG00000116649,ENSG00000082014,ENSG00000105974,ENSG00000114867,ENSG00000173611,ENSG00000133302,ENSG00000108506,ENSG00000177082,ENSG00000101639,ENSG00000108854,ENSG00000092445,ENSG00000119242,ENSG00000111341…
F102	Endothelia	12106	88	1694	12.3139	11	0.8933	0.877294	0.703091	ENSG00000143797,ENSG00000162944,ENSG00000108654,ENSG00000106089,ENSG00000105974,ENSG00000110906,ENSG00000204116,ENSG00000111341,ENSG00000139289,ENSG00000160888,ENSG00000105655
F103	Astrocyte	12106	91	1714	12.884	7	0.543309	0.503246	0.980208	ENSG00000172602,ENSG00000132002,ENSG00000110492,ENSG00000110172,ENSG00000266964,ENSG00000173369,ENSG00000167074
F103	Microglia	12106	91	1566	11.7715	8	0.679606	0.646942	0.91604	ENSG00000203727,ENSG00000231925,ENSG00000159189,ENSG00000051523,ENSG00000173369,ENSG00000167680,ENSG00000176108,ENSG00000011600
F103	Oligodendrocyte	12106	91	2211	16.6199	10	0.601687	0.550507	0.979382	ENSG00000151746,ENSG00000183087,ENSG00000080839,ENSG00000067606,ENSG00000170873,ENSG00000132002,ENSG00000110492,ENSG00000266964,ENSG00000063180,ENSG00000011600
F103	Neuron	12106	91	5889	44.2672	48	1.08432	1.1799	0.248014	ENSG00000151746,ENSG00000113763,ENSG00000106348,ENSG00000196642,ENSG00000177169,ENSG00000146842,ENSG00000067221,ENSG00000183087,ENSG00000152102,ENSG00000099817,ENSG00000205250,ENSG00000172247,ENSG00000123989,ENSG00000172602,ENSG00000080839,ENSG00000158856,ENSG00000136381,ENSG00000071794,ENSG00000205903,ENSG00000106701,ENSG00000170873,ENSG00000197043,ENSG00000132002,ENSG00000153786,ENSG00000114999…
F103	Endothelia	12106	91	1694	12.7337	9	0.706787	0.672887	0.905626	ENSG00000067606,ENSG00000132002,ENSG00000114999,ENSG00000110492,ENSG00000110172,ENSG00000266964,ENSG00000051523,ENSG00000173369,ENSG00000167074
F105	Astrocyte	12106	59	1714	8.35338	8	0.957696	0.950828	0.609484	ENSG00000130811,ENSG00000168228,ENSG00000102119,ENSG00000145721,ENSG00000138074,ENSG00000204482,ENSG00000134278,ENSG00000128928
F105	Microglia	12106	59	1566	7.63208	7	0.917181	0.9056	0.655353	ENSG00000070018,ENSG00000174125,ENSG00000131370,ENSG00000116711,ENSG00000105880,ENSG00000204713,ENSG00000204482
F105	Oligodendrocyte	12106	59	2211	10.7756	8	0.74242	0.700955	0.868144	ENSG00000070018,ENSG00000174125,ENSG00000102119,ENSG00000116711,ENSG00000119699,ENSG00000090889,ENSG00000141401,ENSG00000187135
F105	Neuron	12106	59	5889	28.7007	32	1.11495	1.25254	0.232398	ENSG00000123992,ENSG00000055609,ENSG00000172725,ENSG00000134780,ENSG00000070018,ENSG00000151883,ENSG00000106682,ENSG00000167114,ENSG00000162402,ENSG00000003756,ENSG00000082269,ENSG00000011114,ENSG00000165392,ENSG00000184863,ENSG00000005884,ENSG00000159784,ENSG00000119699,ENSG00000103591,ENSG00000107021,ENSG00000145721,ENSG00000138074,ENSG00000261236,ENSG00000250305,ENSG00000105880,ENSG00000204482…
F105	Endothelia	12106	59	1694	8.25591	6	0.726752	0.694757	0.851661	ENSG00000011114,ENSG00000102119,ENSG00000145721,ENSG00000138074,ENSG00000204482,ENSG00000093183
F107	Astrocyte	12106	115	1714	16.282	8	0.49134	0.450766	0.994769	ENSG00000075618,ENSG00000155366,ENSG00000104361,ENSG00000133872,ENSG00000135541,ENSG00000123975,ENSG00000126457,ENSG00000175287
F107	Microglia	12106	115	1566	14.8761	13	0.873885	0.856654	0.740174	ENSG00000175764,ENSG00000090971,ENSG00000143970,ENSG00000075618,ENSG00000155366,ENSG00000149357,ENSG00000135541,ENSG00000129559,ENSG00000105088,ENSG00000130766,ENSG00000126457,ENSG00000131771,ENSG00000137331
F107	Oligodendrocyte	12106	115	2211	21.0032	9	0.428506	0.377467	0.999568	ENSG00000067167,ENSG00000075618,ENSG00000149357,ENSG00000087884,ENSG00000136463,ENSG00000123975,ENSG00000164086,ENSG00000099308,ENSG00000175287
F107	Neuron	12106	115	5889	55.9421	42	0.750776	0.604595	0.996788	ENSG00000115665,ENSG00000164880,ENSG00000175764,ENSG00000165527,ENSG00000143970,ENSG00000112159,ENSG00000075618,ENSG00000155366,ENSG00000157637,ENSG00000175054,ENSG00000149357,ENSG00000107882,ENSG00000011258,ENSG00000104361,ENSG00000063761,ENSG00000100908,ENSG00000133872,ENSG00000115947,ENSG00000135541,ENSG00000129559,ENSG00000103018,ENSG00000259956,ENSG00000172458,ENSG00000122965,ENSG00000148290…
F107	Endothelia	12106	115	1694	16.092	6	0.372856	0.336002	0.999331	ENSG00000075618,ENSG00000155366,ENSG00000133872,ENSG00000135541,ENSG00000126457,ENSG00000137331
F109	Astrocyte	12106	51	1714	7.22072	5	0.692452	0.658046	0.866536	ENSG00000117410,ENSG00000139687,ENSG00000140990,ENSG00000083857,ENSG00000132432
F109	Microglia	12106	51	1566	6.59722	6	0.909473	0.896996	0.661233	ENSG00000178719,ENSG00000132432,ENSG00000168002,ENSG00000095564,ENSG00000138600,ENSG00000105755
F109	Oligodendrocyte	12106	51	2211	9.31447	4	0.429439	0.379778	0.989592	ENSG00000117410,ENSG00000178719,ENSG00000184220,ENSG00000104969
F109	Neuron	12106	51	5889	24.8091	21	0.846463	0.738074	0.8871	ENSG00000172354,ENSG00000117410,ENSG00000173889,ENSG00000165288,ENSG00000197323,ENSG00000130193,ENSG00000083857,ENSG00000178719,ENSG00000132432,ENSG00000179832,ENSG00000113845,ENSG00000112078,ENSG00000159593,ENSG00000175573,ENSG00000139132,ENSG00000156345,ENSG00000177853,ENSG00000119314,ENSG00000144647,ENSG00000144893,ENSG00000007047
F109	Endothelia	12106	51	1694	7.13646	5	0.700627	0.667124	0.859445	ENSG00000117410,ENSG00000083857,ENSG00000132432,ENSG00000139132,ENSG00000168002
F132	Astrocyte	12106	71	1714	10.0524	7	0.696353	0.661781	0.892258	ENSG00000141552,ENSG00000128463,ENSG00000134056,ENSG00000145681,ENSG00000114503,ENSG00000100142,ENSG00000171885
F132	Microglia	12106	71	1566	9.18437	11	1.19769	1.23556	0.308463	ENSG00000164032,ENSG00000197457,ENSG00000145390,ENSG00000139233,ENSG00000111731,ENSG00000162927,ENSG00000180611,ENSG00000059377,ENSG00000100142,ENSG00000137819,ENSG00000178695
F132	Oligodendrocyte	12106	71	2211	12.9672	4	0.30847	0.265874	0.999542	ENSG00000059377,ENSG00000134853,ENSG00000166224,ENSG00000127616
F132	Neuron	12106	71	5889	34.5382	36	1.04233	1.08636	0.409119	ENSG00000065518,ENSG00000168924,ENSG00000197457,ENSG00000105220,ENSG00000168769,ENSG00000114650,ENSG00000161011,ENSG00000145390,ENSG00000136878,ENSG00000134056,ENSG00000110717,ENSG00000128891,ENSG00000128581,ENSG00000073670,ENSG00000083312,ENSG00000087085,ENSG00000111731,ENSG00000182117,ENSG00000103035,ENSG00000130560,ENSG00000101421,ENSG00000148814,ENSG00000134853,ENSG00000126107,ENSG00000114503…
F132	Endothelia	12106	71	1694	9.93507	6	0.603921	0.565845	0.944532	ENSG00000145390,ENSG00000146242,ENSG00000145681,ENSG00000100142,ENSG00000171885,ENSG00000137819
F133	Astrocyte	12106	115	1714	16.282	15	0.921262	0.908636	0.675038	ENSG00000161203,ENSG00000146648,ENSG00000097021,ENSG00000018408,ENSG00000113068,ENSG00000143776,ENSG00000168785,ENSG00000164066,ENSG00000136930,ENSG00000135472,ENSG00000078808,ENSG00000148660,ENSG00000196660,ENSG00000101638,ENSG00000175556
F133	Microglia	12106	115	1566	14.8761	11	0.739441	0.709862	0.893111	ENSG00000146648,ENSG00000184524,ENSG00000184368,ENSG00000139200,ENSG00000151474,ENSG00000164066,ENSG00000106799,ENSG00000033867,ENSG00000101638,ENSG00000175556,ENSG00000198794
F133	Oligodendrocyte	12106	115	2211	21.0032	16	0.761788	0.721292	0.912827	ENSG00000146648,ENSG00000148516,ENSG00000074317,ENSG00000159164,ENSG00000023228,ENSG00000128739,ENSG00000184368,ENSG00000151474,ENSG00000168785,ENSG00000096384,ENSG00000106799,ENSG00000143315,ENSG00000069966,ENSG00000198794,ENSG00000197183,ENSG00000213551
F133	Neuron	12106	115	5889	55.9421	60	1.07254	1.15322	0.252333	ENSG00000014641,ENSG00000097021,ENSG00000110171,ENSG00000198087,ENSG00000197885,ENSG00000117118,ENSG00000120254,ENSG00000106976,ENSG00000168439,ENSG00000010256,ENSG00000074317,ENSG00000184524,ENSG00000159164,ENSG00000146701,ENSG00000023228,ENSG00000128739,ENSG00000143776,ENSG00000128596,ENSG00000184368,ENSG00000033050,ENSG00000112964,ENSG00000139200,ENSG00000048028,ENSG00000151474,ENSG00000096384…
F133	Endothelia	12106	115	1694	16.092	21	1.30499	1.37777	0.118928	ENSG00000146648,ENSG00000148516,ENSG00000018408,ENSG00000198087,ENSG00000106976,ENSG00000113068,ENSG00000128739,ENSG00000128596,ENSG00000168785,ENSG00000135472,ENSG00000033867,ENSG00000078808,ENSG00000148660,ENSG00000172493,ENSG00000196660,ENSG00000131016,ENSG00000140575,ENSG00000101638,ENSG00000069431,ENSG00000175556,ENSG00000151491
F134	Astrocyte	12106	61	1714	8.63654	15	1.73681	1.98562	0.0206993	ENSG00000111674,ENSG00000111669,ENSG00000258947,ENSG00000127824,ENSG00000102144,ENSG00000120333,ENSG00000149485,ENSG00000148700,ENSG00000050393,ENSG00000120053,ENSG00000138685,ENSG00000119703,ENSG00000119927,ENSG00000140740,ENSG00000140105
F134	Microglia	12106	61	1566	7.8908	9	1.14057	1.16582	0.390804	ENSG00000111674,ENSG00000122122,ENSG00000102144,ENSG00000198108,ENSG00000178127,ENSG00000153012,ENSG00000087253,ENSG00000140836,ENSG00000100321
F134	Oligodendrocyte	12106	61	2211	11.1408	14	1.25664	1.33517	0.21257	ENSG00000111674,ENSG00000111669,ENSG00000122122,ENSG00000258947,ENSG00000102144,ENSG00000038532,ENSG00000198108,ENSG00000154917,ENSG00000079482,ENSG00000149485,ENSG00000135917,ENSG00000182919,ENSG00000100321,ENSG00000130158
F134	Neuron	12106	61	5889	29.6736	35	1.1795	1.4236	0.107536	ENSG00000139112,ENSG00000111674,ENSG00000111669,ENSG00000175166,ENSG00000258947,ENSG00000127824,ENSG00000148834,ENSG00000102144,ENSG00000038532,ENSG00000108239,ENSG00000198108,ENSG00000105649,ENSG00000154917,ENSG00000079482,ENSG00000135956,ENSG00000149485,ENSG00000135632,ENSG00000178127,ENSG00000088247,ENSG00000148700,ENSG00000120053,ENSG00000136143,ENSG00000247077,ENSG00000153012,ENSG00000087253…
F134	Endothelia	12106	61	1694	8.53577	12	1.40585	1.50878	0.137416	ENSG00000111674,ENSG00000127824,ENSG00000149485,ENSG00000187527,ENSG00000148700,ENSG00000120053,ENSG00000087253,ENSG00000138685,ENSG00000140836,ENSG00000119927,ENSG00000130158,ENSG00000140105
F150	Astrocyte	12106	181	1714	25.6265	28	1.09262	1.11142	0.33609	ENSG00000007080,ENSG00000145912,ENSG00000142676,ENSG00000165072,ENSG00000143256,ENSG00000151276,ENSG00000243449,ENSG00000176597,ENSG00000125458,ENSG00000239672,ENSG00000120071,ENSG00000176771,ENSG00000196569,ENSG00000148219,ENSG00000101367,ENSG00000228474,ENSG00000164105,ENSG00000167004,ENSG00000183978,ENSG00000196743,ENSG00000179958,ENSG00000041982,ENSG00000180879,ENSG00000167460,ENSG00000229833…
F150	Microglia	12106	181	1566	23.4137	22	0.939622	0.930282	0.657141	ENSG00000142676,ENSG00000117569,ENSG00000183011,ENSG00000172292,ENSG00000198522,ENSG00000165072,ENSG00000150977,ENSG00000163568,ENSG00000125691,ENSG00000177700,ENSG00000176597,ENSG00000120071,ENSG00000196569,ENSG00000111647,ENSG00000145685,ENSG00000167004,ENSG00000100889,ENSG00000109689,ENSG00000132824,ENSG00000105732,ENSG00000178896,ENSG00000130255
F150	Oligodendrocyte	12106	181	2211	33.0572	25	0.756264	0.71399	0.955393	ENSG00000117569,ENSG00000167363,ENSG00000172292,ENSG00000173542,ENSG00000150977,ENSG00000168916,ENSG00000151276,ENSG00000169439,ENSG00000243449,ENSG00000015171,ENSG00000176771,ENSG00000148219,ENSG00000112701,ENSG00000123124,ENSG00000185963,ENSG00000168137,ENSG00000105696,ENSG00000041982,ENSG00000112312,ENSG00000180879,ENSG00000176165,ENSG00000138193,ENSG00000168904,ENSG00000177302,ENSG00000070761
F150	Neuron	12106	181	5889	88.048	75	0.851808	0.743711	0.979071	ENSG00000125356,ENSG00000176340,ENSG00000007080,ENSG00000128609,ENSG00000144834,ENSG00000119421,ENSG00000131495,ENSG00000242173,ENSG00000142676,ENSG00000145494,ENSG00000129932,ENSG00000172731,ENSG00000141002,ENSG00000132329,ENSG00000137288,ENSG00000142330,ENSG00000205220,ENSG00000142686,ENSG00000172292,ENSG00000184602,ENSG00000143256,ENSG00000182272,ENSG00000106692,ENSG00000139977,ENSG00000125691…
F150	Endothelia	12106	181	1694	25.3274	14	0.55276	0.511252	0.996882	ENSG00000165072,ENSG00000168916,ENSG00000125691,ENSG00000243449,ENSG00000176597,ENSG00000176771,ENSG00000196569,ENSG00000164105,ENSG00000196743,ENSG00000041982,ENSG00000132824,ENSG00000167460,ENSG00000138193,ENSG00000130255
F155	Astrocyte	12106	97	1714	13.7335	6	0.436887	0.397671	0.995948	ENSG00000078177,ENSG00000172461,ENSG00000153253,ENSG00000150433,ENSG00000166165,ENSG00000196935
F155	Microglia	12106	97	1566	12.5477	6	0.478177	0.441653	0.990061	ENSG00000078177,ENSG00000185818,ENSG00000158987,ENSG00000172461,ENSG00000198919,ENSG00000140044
F155	Oligodendrocyte	12106	97	2211	17.7158	9	0.508022	0.455519	0.995572	ENSG00000107902,ENSG00000069424,ENSG00000172461,ENSG00000163939,ENSG00000172469,ENSG00000153253,ENSG00000166165,ENSG00000135048,ENSG00000196935
F155	Neuron	12106	97	5889	47.1859	56	1.18679	1.44612	0.0448731	ENSG00000094975,ENSG00000078177,ENSG00000115904,ENSG00000144228,ENSG00000157782,ENSG00000185818,ENSG00000138623,ENSG00000171159,ENSG00000116586,ENSG00000197530,ENSG00000158987,ENSG00000048140,ENSG00000161642,ENSG00000174996,ENSG00000131584,ENSG00000137845,ENSG00000029534,ENSG00000103264,ENSG00000107902,ENSG00000069424,ENSG00000172461,ENSG00000153339,ENSG00000177706,ENSG00000162817,ENSG00000139405…
F155	Endothelia	12106	97	1694	13.5733	7	0.51572	0.475911	0.987373	ENSG00000137845,ENSG00000172461,ENSG00000162817,ENSG00000153253,ENSG00000166165,ENSG00000196935,ENSG00000138606
F156	Astrocyte	12106	72	1714	10.194	7	0.686682	0.651537	0.900255	ENSG00000111775,ENSG00000124702,ENSG00000181722,ENSG00000054967,ENSG00000117868,ENSG00000095906,ENSG00000162188
F156	Microglia	12106	72	1566	9.31373	6	0.64421	0.610394	0.917752	ENSG00000124614,ENSG00000172985,ENSG00000107829,ENSG00000186001,ENSG00000149311,ENSG00000107281
F156	Oligodendrocyte	12106	72	2211	13.1498	8	0.608372	0.557846	0.965022	ENSG00000164040,ENSG00000091651,ENSG00000204574,ENSG00000187147,ENSG00000116871,ENSG00000172985,ENSG00000181722,ENSG00000162188
F156	Neuron	12106	72	5889	35.0246	34	0.970746	0.944235	0.640303	ENSG00000158864,ENSG00000164040,ENSG00000185591,ENSG00000091651,ENSG00000159352,ENSG00000140199,ENSG00000025796,ENSG00000106636,ENSG00000124702,ENSG00000187147,ENSG00000102908,ENSG00000116871,ENSG00000117691,ENSG00000124614,ENSG00000196372,ENSG00000058063,ENSG00000172985,ENSG00000181722,ENSG00000096717,ENSG00000107829,ENSG00000117868,ENSG00000205269,ENSG00000173264,ENSG00000166295,ENSG00000149311…
F156	Endothelia	12106	72	1694	10.075	4	0.397022	0.360062	0.993593	ENSG00000124614,ENSG00000181722,ENSG00000117868,ENSG00000149311
F159	Astrocyte	12106	79	1714	11.185	3	0.268216	0.238012	0.99945	ENSG00000149809,ENSG00000104886,ENSG00000143324
F159	Microglia	12106	79	1566	10.2192	8	0.782838	0.757144	0.818333	ENSG00000142655,ENSG00000115828,ENSG00000066084,ENSG00000196405,ENSG00000141298,ENSG00000185278,ENSG00000060558,ENSG00000186952
F159	Oligodendrocyte	12106	79	2211	14.4283	10	0.693082	0.647029	0.930724	ENSG00000160460,ENSG00000066084,ENSG00000122482,ENSG00000196405,ENSG00000141298,ENSG00000143324,ENSG00000196526,ENSG00000135828,ENSG00000186952,ENSG00000103978
F159	Neuron	12106	79	5889	38.4298	40	1.04086	1.0833	0.404232	ENSG00000047579,ENSG00000149541,ENSG00000141933,ENSG00000160460,ENSG00000149809,ENSG00000115828,ENSG00000147852,ENSG00000066084,ENSG00000196405,ENSG00000140859,ENSG00000141298,ENSG00000099814,ENSG00000105647,ENSG00000159069,ENSG00000148396,ENSG00000088179,ENSG00000110344,ENSG00000153827,ENSG00000143324,ENSG00000005302,ENSG00000108256,ENSG00000130511,ENSG00000103404,ENSG00000196526,ENSG00000167566…
F159	Endothelia	12106	79	1694	11.0545	2	0.180921	0.158666	0.99991	ENSG00000130511,ENSG00000104870
F168	Astrocyte	12106	61	1714	8.63654	9	1.04208	1.04963	0.502391	ENSG00000166833,ENSG00000136044,ENSG00000154096,ENSG00000063244,ENSG00000143761,ENSG00000011405,ENSG00000146070,ENSG00000119707,ENSG00000196465
F168	Microglia	12106	61	1566	7.8908	2	0.25346	0.227182	0.997884	ENSG00000111344,ENSG00000146070
F168	Oligodendrocyte	12106	61	2211	11.1408	8	0.718079	0.674369	0.890815	ENSG00000166833,ENSG00000163728,ENSG00000167654,ENSG00000185946,ENSG00000136044,ENSG00000154096,ENSG00000067225,ENSG00000151503
F168	Neuron	12106	61	5889	29.6736	28	0.943599	0.895258	0.711197	ENSG00000139182,ENSG00000166833,ENSG00000129355,ENSG00000165271,ENSG00000163728,ENSG00000167654,ENSG00000165752,ENSG00000068878,ENSG00000154096,ENSG00000143761,ENSG00000102879,ENSG00000145794,ENSG00000011405,ENSG00000176018,ENSG00000164970,ENSG00000157014,ENSG00000197601,ENSG00000092439,ENSG00000035681,ENSG00000122034,ENSG00000165521,ENSG00000107789,ENSG00000142046,ENSG00000085185,ENSG00000100028…
F168	Endothelia	12106	61	1694	8.53577	7	0.820079	0.795926	0.768387	ENSG00000166833,ENSG00000136044,ENSG00000063244,ENSG00000011405,ENSG00000163820,ENSG00000146070,ENSG00000196465
F169	Astrocyte	12106	69	1714	9.76921	8	0.8189	0.794203	0.779322	ENSG00000143106,ENSG00000205268,ENSG00000117448,ENSG00000244754,ENSG00000137601,ENSG00000064199,ENSG00000167815,ENSG00000183207
F169	Microglia	12106	69	1566	8.92566	3	0.33611	0.30462	0.995626	ENSG00000126214,ENSG00000166313,ENSG00000168291
F169	Oligodendrocyte	12106	69	2211	12.6019	9	0.714176	0.669982	0.904696	ENSG00000144847,ENSG00000054793,ENSG00000066248,ENSG00000051341,ENSG00000116514,ENSG00000170185,ENSG00000139618,ENSG00000157890,ENSG00000033627
F169	Neuron	12106	69	5889	33.5653	32	0.953367	0.912587	0.690611	ENSG00000067208,ENSG00000126214,ENSG00000117620,ENSG00000156515,ENSG00000103502,ENSG00000114857,ENSG00000185219,ENSG00000142669,ENSG00000143106,ENSG00000122705,ENSG00000085382,ENSG00000136152,ENSG00000166313,ENSG00000054793,ENSG00000066248,ENSG00000124688,ENSG00000205268,ENSG00000117448,ENSG00000143811,ENSG00000130764,ENSG00000188566,ENSG00000116514,ENSG00000168291,ENSG00000140319,ENSG00000063854…
F169	Endothelia	12106	69	1694	9.65521	3	0.310713	0.278122	0.997786	ENSG00000129292,ENSG00000205268,ENSG00000244754
F190	Astrocyte	12106	54	1714	7.64547	3	0.392389	0.35554	0.987304	ENSG00000150625,ENSG00000130227,ENSG00000108953
F190	Microglia	12106	54	1566	6.9853	4	0.572631	0.537283	0.931627	ENSG00000107719,ENSG00000100311,ENSG00000100060,ENSG00000103066
F190	Oligodendrocyte	12106	54	2211	9.86238	7	0.709768	0.665505	0.886361	ENSG00000196821,ENSG00000163644,ENSG00000173273,ENSG00000150625,ENSG00000112576,ENSG00000105887,ENSG00000103066
F190	Neuron	12106	54	5889	26.2685	29	1.10399	1.2257	0.27123	ENSG00000164031,ENSG00000198646,ENSG00000146463,ENSG00000128482,ENSG00000176978,ENSG00000169683,ENSG00000140983,ENSG00000163644,ENSG00000173273,ENSG00000150625,ENSG00000186432,ENSG00000112584,ENSG00000177311,ENSG00000130227,ENSG00000058453,ENSG00000112576,ENSG00000178233,ENSG00000108953,ENSG00000143554,ENSG00000104369,ENSG00000172732,ENSG00000105887,ENSG00000185619,ENSG00000100813,ENSG00000153485…
F190	Endothelia	12106	54	1694	7.55625	7	0.926385	0.915059	0.645967	ENSG00000150625,ENSG00000130227,ENSG00000108953,ENSG00000100813,ENSG00000107719,ENSG00000100311,ENSG00000100060
F194	Astrocyte	12106	67	1714	9.48604	9	0.948763	0.940495	0.621135	ENSG00000196586,ENSG00000134769,ENSG00000157005,ENSG00000165478,ENSG00000012660,ENSG00000164237,ENSG00000183696,ENSG00000077585,ENSG00000188730
F194	Microglia	12106	67	1566	8.66694	6	0.692286	0.660739	0.880523	ENSG00000116254,ENSG00000197106,ENSG00000103449,ENSG00000140750,ENSG00000105281,ENSG00000185052
F194	Oligodendrocyte	12106	67	2211	12.2367	16	1.30755	1.40693	0.150494	ENSG00000182287,ENSG00000196586,ENSG00000134769,ENSG00000197106,ENSG00000088854,ENSG00000157005,ENSG00000184014,ENSG00000185344,ENSG00000143553,ENSG00000241258,ENSG00000183696,ENSG00000188730,ENSG00000058335,ENSG00000185052,ENSG00000135392,ENSG00000163808
F194	Neuron	12106	67	5889	32.5924	33	1.01251	1.02479	0.508579	ENSG00000137274,ENSG00000116254,ENSG00000182287,ENSG00000196586,ENSG00000144645,ENSG00000134769,ENSG00000197106,ENSG00000198142,ENSG00000153395,ENSG00000157005,ENSG00000149927,ENSG00000092621,ENSG00000184014,ENSG00000085733,ENSG00000162975,ENSG00000105245,ENSG00000165478,ENSG00000184432,ENSG00000012660,ENSG00000185344,ENSG00000166166,ENSG00000164237,ENSG00000140750,ENSG00000103056,ENSG00000183696…
F194	Endothelia	12106	67	1694	9.37535	12	1.27995	1.34343	0.220916	ENSG00000156453,ENSG00000116254,ENSG00000196586,ENSG00000134769,ENSG00000157005,ENSG00000165478,ENSG00000012660,ENSG00000173638,ENSG00000183696,ENSG00000077585,ENSG00000188730,ENSG00000101335
F195	Astrocyte	12106	250	1714	35.3957	40	1.13008	1.15852	0.223151	ENSG00000011009,ENSG00000107874,ENSG00000119013,ENSG00000167792,ENSG00000164190,ENSG00000151729,ENSG00000126432,ENSG00000105701,ENSG00000172757,ENSG00000277791,ENSG00000090238,ENSG00000143420,ENSG00000108518,ENSG00000204231,ENSG00000189043,ENSG00000005022,ENSG00000100852,ENSG00000112651,ENSG00000198937,ENSG00000079462,ENSG00000137942,ENSG00000092096,ENSG00000143198,ENSG00000147027,ENSG00000162415…
F195	Microglia	12106	250	1566	32.3393	25	0.773052	0.743762	0.936407	ENSG00000157827,ENSG00000187416,ENSG00000126432,ENSG00000172757,ENSG00000142507,ENSG00000140262,ENSG00000108518,ENSG00000102531,ENSG00000102003,ENSG00000189043,ENSG00000152492,ENSG00000065413,ENSG00000079462,ENSG00000198208,ENSG00000182957,ENSG00000162415,ENSG00000046653,ENSG00000104067,ENSG00000171448,ENSG00000160087,ENSG00000264364,ENSG00000140479,ENSG00000172009,ENSG00000104112,ENSG00000197019
F195	Oligodendrocyte	12106	250	2211	45.6592	29	0.635141	0.581806	0.998581	ENSG00000009413,ENSG00000157827,ENSG00000187416,ENSG00000107771,ENSG00000178449,ENSG00000140262,ENSG00000102531,ENSG00000137478,ENSG00000102003,ENSG00000189043,ENSG00000005022,ENSG00000100852,ENSG00000123159,ENSG00000162413,ENSG00000065413,ENSG00000036549,ENSG00000197355,ENSG00000046653,ENSG00000110921,ENSG00000277972,ENSG00000104067,ENSG00000137343,ENSG00000130540,ENSG00000125835,ENSG00000264364…
F195	Neuron	12106	250	5889	121.613	126	1.03607	1.07428	0.309497	ENSG00000011009,ENSG00000121769,ENSG00000175756,ENSG00000131023,ENSG00000055208,ENSG00000081154,ENSG00000119013,ENSG00000167792,ENSG00000106263,ENSG00000164190,ENSG00000009413,ENSG00000142920,ENSG00000130204,ENSG00000166548,ENSG00000157827,ENSG00000140367,ENSG00000151366,ENSG00000187416,ENSG00000151729,ENSG00000107771,ENSG00000065243,ENSG00000122417,ENSG00000172757,ENSG00000175792,ENSG00000083097…
F195	Endothelia	12106	250	1694	34.9827	29	0.828982	0.803185	0.885885	ENSG00000167792,ENSG00000164190,ENSG00000132964,ENSG00000126432,ENSG00000065243,ENSG00000172757,ENSG00000090238,ENSG00000137478,ENSG00000204231,ENSG00000100852,ENSG00000065413,ENSG00000112651,ENSG00000198937,ENSG00000137942,ENSG00000092096,ENSG00000147027,ENSG00000046653,ENSG00000138767,ENSG00000104067,ENSG00000183828,ENSG00000170315,ENSG00000172922,ENSG00000130540,ENSG00000159140,ENSG00000100362…
F196	Astrocyte	12106	83	1714	11.7514	6	0.510579	0.470613	0.983245	ENSG00000152208,ENSG00000198947,ENSG00000180992,ENSG00000139343,ENSG00000033178,ENSG00000159314
F196	Microglia	12106	83	1566	10.7367	12	1.11767	1.13858	0.386714	ENSG00000185668,ENSG00000174799,ENSG00000198947,ENSG00000154146,ENSG00000180992,ENSG00000171988,ENSG00000272325,ENSG00000197969,ENSG00000100417,ENSG00000105321,ENSG00000175866,ENSG00000159314
F196	Oligodendrocyte	12106	83	2211	15.1588	9	0.593713	0.542465	0.977257	ENSG00000159459,ENSG00000152208,ENSG00000198947,ENSG00000214253,ENSG00000188994,ENSG00000163249,ENSG00000164327,ENSG00000100644,ENSG00000100092
F196	Neuron	12106	83	5889	40.3756	46	1.1393	1.31491	0.129393	ENSG00000082898,ENSG00000185668,ENSG00000095787,ENSG00000159459,ENSG00000152208,ENSG00000174799,ENSG00000198947,ENSG00000204590,ENSG00000114631,ENSG00000138802,ENSG00000214253,ENSG00000154146,ENSG00000180992,ENSG00000178498,ENSG00000106460,ENSG00000100697,ENSG00000188994,ENSG00000139343,ENSG00000163249,ENSG00000100644,ENSG00000071655,ENSG00000112167,ENSG00000143847,ENSG00000177888,ENSG00000171988…
F196	Endothelia	12106	83	1694	11.6142	4	0.344405	0.309599	0.998204	ENSG00000152208,ENSG00000198947,ENSG00000164219,ENSG00000159314
F197	Astrocyte	12106	81	1714	11.4682	9	0.784779	0.756615	0.828126	ENSG00000131242,ENSG00000152556,ENSG00000082438,ENSG00000138413,ENSG00000119711,ENSG00000067064,ENSG00000145423,ENSG00000133121,ENSG00000160285
F197	Microglia	12106	81	1566	10.4779	7	0.66807	0.635061	0.913351	ENSG00000102218,ENSG00000114331,ENSG00000012983,ENSG00000188191,ENSG00000176884,ENSG00000167977,ENSG00000141837
F197	Oligodendrocyte	12106	81	2211	14.7936	16	1.08155	1.10238	0.408034	ENSG00000198625,ENSG00000020129,ENSG00000012983,ENSG00000188191,ENSG00000176884,ENSG00000165476,ENSG00000034053,ENSG00000181704,ENSG00000067064,ENSG00000151466,ENSG00000004961,ENSG00000181195,ENSG00000112972,ENSG00000160285,ENSG00000141837,ENSG00000134758
F197	Neuron	12106	81	5889	39.4027	36	0.913643	0.843614	0.807857	ENSG00000119912,ENSG00000054116,ENSG00000131242,ENSG00000162728,ENSG00000152556,ENSG00000114331,ENSG00000124535,ENSG00000141959,ENSG00000020129,ENSG00000138413,ENSG00000012983,ENSG00000102786,ENSG00000188191,ENSG00000138834,ENSG00000176884,ENSG00000120533,ENSG00000165476,ENSG00000138386,ENSG00000147130,ENSG00000181704,ENSG00000149328,ENSG00000067064,ENSG00000151466,ENSG00000181195,ENSG00000112972…
F197	Endothelia	12106	81	1694	11.3344	6	0.529363	0.489929	0.97765	ENSG00000152556,ENSG00000082438,ENSG00000138413,ENSG00000119711,ENSG00000133121,ENSG00000160285
F198	Astrocyte	12106	54	1714	7.64547	12	1.56956	1.73735	0.0716773	ENSG00000234224,ENSG00000148498,ENSG00000112531,ENSG00000155324,ENSG00000119139,ENSG00000136205,ENSG00000062598,ENSG00000167642,ENSG00000105516,ENSG00000168461,ENSG00000089006,ENSG00000072310
F198	Microglia	12106	54	1566	6.9853	9	1.28842	1.34807	0.258972	ENSG00000152689,ENSG00000158195,ENSG00000155324,ENSG00000149527,ENSG00000157445,ENSG00000100439,ENSG00000278195,ENSG00000184792,ENSG00000089006
F198	Oligodendrocyte	12106	54	2211	9.86238	16	1.62233	1.89062	0.0283177	ENSG00000152689,ENSG00000148498,ENSG00000112531,ENSG00000106462,ENSG00000166762,ENSG00000135069,ENSG00000171316,ENSG00000157445,ENSG00000136205,ENSG00000072864,ENSG00000138376,ENSG00000106333,ENSG00000147421,ENSG00000168461,ENSG00000184792,ENSG00000089006
F198	Neuron	12106	54	5889	26.2685	31	1.18012	1.42508	0.124081	ENSG00000170759,ENSG00000120896,ENSG00000234224,ENSG00000140416,ENSG00000148498,ENSG00000172007,ENSG00000112531,ENSG00000169783,ENSG00000105856,ENSG00000135069,ENSG00000171316,ENSG00000165424,ENSG00000111696,ENSG00000157445,ENSG00000166340,ENSG00000136205,ENSG00000242485,ENSG00000137513,ENSG00000106333,ENSG00000126705,ENSG00000164751,ENSG00000141385,ENSG00000040608,ENSG00000167642,ENSG00000168461…
F198	Endothelia	12106	54	1694	7.55625	16	2.11745	2.60271	0.00222638	ENSG00000152689,ENSG00000170759,ENSG00000234224,ENSG00000140416,ENSG00000148498,ENSG00000112531,ENSG00000158195,ENSG00000155324,ENSG00000171316,ENSG00000119139,ENSG00000136205,ENSG00000147421,ENSG00000062598,ENSG00000105516,ENSG00000168461,ENSG00000072310
F203	Astrocyte	12106	50	1714	7.07913	9	1.27134	1.33261	0.271089	ENSG00000120278,ENSG00000187486,ENSG00000166432,ENSG00000172380,ENSG00000120129,ENSG00000121671,ENSG00000162804,ENSG00000145632,ENSG00000089123
F203	Microglia	12106	50	1566	6.46787	4	0.618442	0.584223	0.902536	ENSG00000140406,ENSG00000075711,ENSG00000128683,ENSG00000188042
F203	Oligodendrocyte	12106	50	2211	9.13184	10	1.09507	1.1194	0.431342	ENSG00000120278,ENSG00000075711,ENSG00000172380,ENSG00000120129,ENSG00000174442,ENSG00000162804,ENSG00000149929,ENSG00000188042,ENSG00000064115,ENSG00000183779
F203	Neuron	12106	50	5889	24.3226	28	1.15119	1.34522	0.183845	ENSG00000143590,ENSG00000120278,ENSG00000166398,ENSG00000187486,ENSG00000244005,ENSG00000075711,ENSG00000128683,ENSG00000166432,ENSG00000172380,ENSG00000181004,ENSG00000120129,ENSG00000161981,ENSG00000121671,ENSG00000174442,ENSG00000024048,ENSG00000162804,ENSG00000070444,ENSG00000188042,ENSG00000064115,ENSG00000145632,ENSG00000132768,ENSG00000129493,ENSG00000141551,ENSG00000104897,ENSG00000169718…
F203	Endothelia	12106	50	1694	6.99653	10	1.42928	1.53972	0.152872	ENSG00000120278,ENSG00000166398,ENSG00000187486,ENSG00000128683,ENSG00000166432,ENSG00000172380,ENSG00000120129,ENSG00000162804,ENSG00000188483,ENSG00000089123
F232	Astrocyte	12106	118	1714	16.7068	23	1.37669	1.47419	0.0664989	ENSG00000175550,ENSG00000068976,ENSG00000131469,ENSG00000174748,ENSG00000106153,ENSG00000149806,ENSG00000130520,ENSG00000144713,ENSG00000103489,ENSG00000104904,ENSG00000105372,ENSG00000088727,ENSG00000254858,ENSG00000197958,ENSG00000163288,ENSG00000198838,ENSG00000166263,ENSG00000128585,ENSG00000165512,ENSG00000167775,ENSG00000167468,ENSG00000175267,ENSG00000146828
F232	Microglia	12106	118	1566	15.2642	13	0.851668	0.831929	0.772707	ENSG00000182774,ENSG00000131469,ENSG00000174748,ENSG00000149806,ENSG00000198586,ENSG00000124406,ENSG00000105372,ENSG00000106617,ENSG00000198838,ENSG00000128585,ENSG00000171813,ENSG00000125675,ENSG00000128294
F232	Oligodendrocyte	12106	118	2211	21.5511	23	1.06723	1.08439	0.401052	ENSG00000246705,ENSG00000149806,ENSG00000130520,ENSG00000196712,ENSG00000198586,ENSG00000173517,ENSG00000103489,ENSG00000157764,ENSG00000124406,ENSG00000105372,ENSG00000164796,ENSG00000171681,ENSG00000170921,ENSG00000163288,ENSG00000198838,ENSG00000156103,ENSG00000167588,ENSG00000128585,ENSG00000125675,ENSG00000145348,ENSG00000167468,ENSG00000033170,ENSG00000139998
F232	Neuron	12106	118	5889	57.4015	64	1.11495	1.25393	0.129503	ENSG00000102109,ENSG00000175550,ENSG00000125912,ENSG00000131469,ENSG00000174748,ENSG00000143774,ENSG00000167658,ENSG00000149806,ENSG00000130520,ENSG00000182512,ENSG00000196712,ENSG00000066557,ENSG00000198586,ENSG00000203965,ENSG00000175602,ENSG00000144713,ENSG00000173517,ENSG00000103489,ENSG00000115159,ENSG00000157764,ENSG00000074855,ENSG00000124406,ENSG00000134480,ENSG00000131143,ENSG00000105372…
F232	Endothelia	12106	118	1694	16.5118	10	0.605627	0.566575	0.975653	ENSG00000182774,ENSG00000131469,ENSG00000103489,ENSG00000131143,ENSG00000105372,ENSG00000163288,ENSG00000198838,ENSG00000128585,ENSG00000204536,ENSG00000033170
F243	Astrocyte	12106	87	1714	12.3177	15	1.21776	1.26542	0.24401	ENSG00000135744,ENSG00000147872,ENSG00000116761,ENSG00000008311,ENSG00000162267,ENSG00000137561,ENSG00000120915,ENSG00000116285,ENSG00000142871,ENSG00000164741,ENSG00000178878,ENSG00000105852,ENSG00000128016,ENSG00000167216,ENSG00000139926
F243	Microglia	12106	87	1566	11.2541	16	1.42171	1.522	0.0908771	ENSG00000131781,ENSG00000147872,ENSG00000106366,ENSG00000005471,ENSG00000188641,ENSG00000241399,ENSG00000112893,ENSG00000170458,ENSG00000180233,ENSG00000164741,ENSG00000030582,ENSG00000105852,ENSG00000184557,ENSG00000142178,ENSG00000128016,ENSG00000167202
F243	Oligodendrocyte	12106	87	2211	15.8894	11	0.692286	0.646011	0.939008	ENSG00000130695,ENSG00000188641,ENSG00000112893,ENSG00000138207,ENSG00000162670,ENSG00000164741,ENSG00000178878,ENSG00000143367,ENSG00000184557,ENSG00000128016,ENSG00000130958
F243	Neuron	12106	87	5889	42.3214	27	0.637975	0.472676	0.999723	ENSG00000023330,ENSG00000135744,ENSG00000115594,ENSG00000049239,ENSG00000115758,ENSG00000188641,ENSG00000106327,ENSG00000137561,ENSG00000130707,ENSG00000112893,ENSG00000138207,ENSG00000140284,ENSG00000176022,ENSG00000162670,ENSG00000170458,ENSG00000095539,ENSG00000017427,ENSG00000164741,ENSG00000067182,ENSG00000052841,ENSG00000204104,ENSG00000181220,ENSG00000185624,ENSG00000102743,ENSG00000124098…
F243	Endothelia	12106	87	1694	12.174	17	1.39642	1.49763	0.0936327	ENSG00000023330,ENSG00000135744,ENSG00000116761,ENSG00000115594,ENSG00000162267,ENSG00000120341,ENSG00000137561,ENSG00000120915,ENSG00000116285,ENSG00000112893,ENSG00000142871,ENSG00000164741,ENSG00000178878,ENSG00000105852,ENSG00000128016,ENSG00000137801,ENSG00000139926
F259	Astrocyte	12106	70	1714	9.91079	10	1.009	1.01056	0.540019	ENSG00000185352,ENSG00000004799,ENSG00000106537,ENSG00000110786,ENSG00000198034,ENSG00000111142,ENSG00000106809,ENSG00000089057,ENSG00000100095,ENSG00000154217
F259	Microglia	12106	70	1566	9.05501	9	0.993924	0.992988	0.561616	ENSG00000114554,ENSG00000185352,ENSG00000004799,ENSG00000137642,ENSG00000196730,ENSG00000198034,ENSG00000011028,ENSG00000100095,ENSG00000088298
F259	Oligodendrocyte	12106	70	2211	12.7846	11	0.860412	0.833572	0.755522	ENSG00000146083,ENSG00000185352,ENSG00000121864,ENSG00000163399,ENSG00000155657,ENSG00000163788,ENSG00000196730,ENSG00000006831,ENSG00000070501,ENSG00000100095,ENSG00000154217
F259	Neuron	12106	70	5889	34.0517	37	1.08658	1.1848	0.278464	ENSG00000146083,ENSG00000114554,ENSG00000185352,ENSG00000168906,ENSG00000170581,ENSG00000004799,ENSG00000152520,ENSG00000106537,ENSG00000163399,ENSG00000155657,ENSG00000163788,ENSG00000137642,ENSG00000006210,ENSG00000123360,ENSG00000110786,ENSG00000145708,ENSG00000119326,ENSG00000196730,ENSG00000102316,ENSG00000144233,ENSG00000169258,ENSG00000143612,ENSG00000154330,ENSG00000177239,ENSG00000162971…
F259	Endothelia	12106	70	1694	9.79514	9	0.918823	0.906333	0.660275	ENSG00000185352,ENSG00000004799,ENSG00000137642,ENSG00000110786,ENSG00000154330,ENSG00000198034,ENSG00000111142,ENSG00000089057,ENSG00000154217
F263	Astrocyte	12106	50	1714	7.07913	6	0.847561	0.826178	0.729657	ENSG00000119283,ENSG00000134775,ENSG00000138795,ENSG00000188846,ENSG00000133800,ENSG00000135318
F263	Microglia	12106	50	1566	6.46787	7	1.08227	1.09612	0.473582	ENSG00000177301,ENSG00000183049,ENSG00000171819,ENSG00000196876,ENSG00000133800,ENSG00000196865,ENSG00000154162
F263	Oligodendrocyte	12106	50	2211	9.13184	7	0.766549	0.727703	0.832499	ENSG00000023171,ENSG00000010818,ENSG00000196876,ENSG00000133800,ENSG00000154162,ENSG00000166750,ENSG00000139292
F263	Neuron	12106	50	5889	24.3226	19	0.781165	0.645923	0.951334	ENSG00000164715,ENSG00000119283,ENSG00000177301,ENSG00000183049,ENSG00000166938,ENSG00000011465,ENSG00000134775,ENSG00000151689,ENSG00000023171,ENSG00000010818,ENSG00000248487,ENSG00000143641,ENSG00000196876,ENSG00000173011,ENSG00000155158,ENSG00000154162,ENSG00000111300,ENSG00000171456,ENSG00000066926
F263	Endothelia	12106	50	1694	6.99653	9	1.28635	1.35103	0.259651	ENSG00000119283,ENSG00000011465,ENSG00000134775,ENSG00000151689,ENSG00000138795,ENSG00000133800,ENSG00000135318,ENSG00000161940,ENSG00000131871
F270	Astrocyte	12106	227	1714	32.1393	43	1.33793	1.42758	0.0264914	ENSG00000080493,ENSG00000164035,ENSG00000197977,ENSG00000198964,ENSG00000244038,ENSG00000162618,ENSG00000198886,ENSG00000135919,ENSG00000143248,ENSG00000086061,ENSG00000163285,ENSG00000069122,ENSG00000152583,ENSG00000133318,ENSG00000117632,ENSG00000176386,ENSG00000070778,ENSG00000152527,ENSG00000100577,ENSG00000146072,ENSG00000166265,ENSG00000101938,ENSG00000214575,ENSG00000136111,ENSG00000103257…
F270	Microglia	12106	227	1566	29.3641	16	0.544883	0.505341	0.998536	ENSG00000169313,ENSG00000135919,ENSG00000183780,ENSG00000171659,ENSG00000179331,ENSG00000136732,ENSG00000147454,ENSG00000124782,ENSG00000189050,ENSG00000187398,ENSG00000135052,ENSG00000187796,ENSG00000043462,ENSG00000164056,ENSG00000129566,ENSG00000127528
F270	Oligodendrocyte	12106	227	2211	41.4585	31	0.747735	0.703703	0.974665	ENSG00000174943,ENSG00000169313,ENSG00000198804,ENSG00000135919,ENSG00000171793,ENSG00000167861,ENSG00000152583,ENSG00000133318,ENSG00000117632,ENSG00000131773,ENSG00000152527,ENSG00000179331,ENSG00000040341,ENSG00000146072,ENSG00000020426,ENSG00000101938,ENSG00000187398,ENSG00000111581,ENSG00000167699,ENSG00000203760,ENSG00000197548,ENSG00000046889,ENSG00000179292,ENSG00000130816,ENSG00000164056…
F270	Neuron	12106	227	5889	110.425	115	1.04143	1.08562	0.292335	ENSG00000174943,ENSG00000080493,ENSG00000064419,ENSG00000150753,ENSG00000006118,ENSG00000170633,ENSG00000115339,ENSG00000169313,ENSG00000198198,ENSG00000120256,ENSG00000197977,ENSG00000113971,ENSG00000104853,ENSG00000198964,ENSG00000127947,ENSG00000168092,ENSG00000176444,ENSG00000244038,ENSG00000115233,ENSG00000135919,ENSG00000167861,ENSG00000143248,ENSG00000167986,ENSG00000183780,ENSG00000143341…
F270	Endothelia	12106	227	1694	31.7642	44	1.38521	1.4905	0.0143179	ENSG00000080493,ENSG00000164035,ENSG00000006118,ENSG00000197977,ENSG00000198964,ENSG00000162618,ENSG00000198886,ENSG00000163492,ENSG00000135919,ENSG00000143248,ENSG00000143341,ENSG00000086061,ENSG00000163285,ENSG00000069122,ENSG00000122008,ENSG00000152583,ENSG00000133318,ENSG00000179348,ENSG00000131773,ENSG00000152527,ENSG00000100577,ENSG00000145246,ENSG00000166265,ENSG00000101938,ENSG00000214575…
F273	Astrocyte	12106	50	1714	7.07913	5	0.706301	0.672733	0.854856	ENSG00000145362,ENSG00000116729,ENSG00000182168,ENSG00000187391,ENSG00000135446
F273	Microglia	12106	50	1566	6.46787	6	0.927663	0.917475	0.641715	ENSG00000113441,ENSG00000123349,ENSG00000087263,ENSG00000182168,ENSG00000137193,ENSG00000187391
F273	Oligodendrocyte	12106	50	2211	9.13184	11	1.20458	1.26356	0.297982	ENSG00000090097,ENSG00000145362,ENSG00000144935,ENSG00000023516,ENSG00000118200,ENSG00000066777,ENSG00000102452,ENSG00000155966,ENSG00000182168,ENSG00000029153,ENSG00000187391
F273	Neuron	12106	50	5889	24.3226	29	1.1923	1.46008	0.118078	ENSG00000166326,ENSG00000090097,ENSG00000163001,ENSG00000038219,ENSG00000145362,ENSG00000116729,ENSG00000144935,ENSG00000023516,ENSG00000107404,ENSG00000107560,ENSG00000140612,ENSG00000118200,ENSG00000066777,ENSG00000123349,ENSG00000102452,ENSG00000155966,ENSG00000182168,ENSG00000029153,ENSG00000114405,ENSG00000237441,ENSG00000136715,ENSG00000187391,ENSG00000113211,ENSG00000167962,ENSG00000213930…
F273	Endothelia	12106	50	1694	6.99653	5	0.71464	0.682014	0.847412	ENSG00000145362,ENSG00000116729,ENSG00000145198,ENSG00000102452,ENSG00000187391
F288	Astrocyte	12106	52	1714	7.3623	7	0.95079	0.942897	0.617924	ENSG00000172889,ENSG00000113558,ENSG00000115145,ENSG00000135838,ENSG00000078674,ENSG00000114859,ENSG00000132122
F288	Microglia	12106	52	1566	6.72658	7	1.04065	1.04719	0.516805	ENSG00000127022,ENSG00000075539,ENSG00000052795,ENSG00000170677,ENSG00000135838,ENSG00000276231,ENSG00000080815
F288	Oligodendrocyte	12106	52	2211	9.49711	8	0.842362	0.813037	0.75776	ENSG00000176720,ENSG00000075539,ENSG00000174953,ENSG00000135838,ENSG00000132122,ENSG00000143228,ENSG00000139218,ENSG00000080815
F288	Neuron	12106	52	5889	25.2956	26	1.02785	1.05596	0.476873	ENSG00000196923,ENSG00000176720,ENSG00000164985,ENSG00000172889,ENSG00000075539,ENSG00000168216,ENSG00000113558,ENSG00000160404,ENSG00000052795,ENSG00000073614,ENSG00000170677,ENSG00000145431,ENSG00000094631,ENSG00000090539,ENSG00000166793,ENSG00000017260,ENSG00000078674,ENSG00000122557,ENSG00000113580,ENSG00000138138,ENSG00000143228,ENSG00000007264,ENSG00000169062,ENSG00000185340,ENSG00000147144…
F288	Endothelia	12106	52	1694	7.27639	8	1.09945	1.11804	0.445378	ENSG00000172889,ENSG00000127022,ENSG00000115145,ENSG00000135838,ENSG00000132405,ENSG00000276231,ENSG00000114859,ENSG00000132122
F326	Astrocyte	12106	64	1714	9.06129	14	1.54503	1.70329	0.0611778	ENSG00000177556,ENSG00000143603,ENSG00000080298,ENSG00000142634,ENSG00000148053,ENSG00000178904,ENSG00000143171,ENSG00000004838,ENSG00000090266,ENSG00000047662,ENSG00000116299,ENSG00000134317,ENSG00000175899,ENSG00000176101
F326	Microglia	12106	64	1566	8.27887	11	1.32868	1.39966	0.199067	ENSG00000143603,ENSG00000080298,ENSG00000198722,ENSG00000164733,ENSG00000114784,ENSG00000142634,ENSG00000143171,ENSG00000187957,ENSG00000107186,ENSG00000175899,ENSG00000179583
F326	Oligodendrocyte	12106	64	2211	11.6887	10	0.855524	0.828004	0.755658	ENSG00000080298,ENSG00000168993,ENSG00000182985,ENSG00000148053,ENSG00000187957,ENSG00000090266,ENSG00000065665,ENSG00000053372,ENSG00000134317,ENSG00000184903
F326	Neuron	12106	64	5889	31.133	40	1.28481	1.76459	0.0177099	ENSG00000177556,ENSG00000143067,ENSG00000080298,ENSG00000198722,ENSG00000164733,ENSG00000168993,ENSG00000106628,ENSG00000114784,ENSG00000182985,ENSG00000174705,ENSG00000139117,ENSG00000197321,ENSG00000148053,ENSG00000006071,ENSG00000180155,ENSG00000010295,ENSG00000148943,ENSG00000106683,ENSG00000187957,ENSG00000090266,ENSG00000047662,ENSG00000105819,ENSG00000065665,ENSG00000116299,ENSG00000170088…
F326	Endothelia	12106	64	1694	8.95556	13	1.45161	1.57104	0.103798	ENSG00000143603,ENSG00000177098,ENSG00000197321,ENSG00000148053,ENSG00000178904,ENSG00000143171,ENSG00000090266,ENSG00000116299,ENSG00000156925,ENSG00000134317,ENSG00000184903,ENSG00000175899,ENSG00000102804
F345	Astrocyte	12106	51	1714	7.22072	10	1.3849	1.48153	0.176912	ENSG00000151834,ENSG00000155090,ENSG00000090520,ENSG00000244405,ENSG00000116717,ENSG00000107863,ENSG00000166598,ENSG00000126016,ENSG00000128805,ENSG00000126803
F345	Microglia	12106	51	1566	6.59722	8	1.21263	1.25346	0.33683	ENSG00000160932,ENSG00000244405,ENSG00000138814,ENSG00000181804,ENSG00000107863,ENSG00000128805,ENSG00000112232,ENSG00000077420
F345	Oligodendrocyte	12106	51	2211	9.31447	14	1.50304	1.6977	0.0692472	ENSG00000185736,ENSG00000085999,ENSG00000132196,ENSG00000049130,ENSG00000138814,ENSG00000181804,ENSG00000107863,ENSG00000166598,ENSG00000169908,ENSG00000126803,ENSG00000180730,ENSG00000011638,ENSG00000112232,ENSG00000077420
F345	Neuron	12106	51	5889	24.8091	22	0.886771	0.800143	0.823454	ENSG00000151834,ENSG00000135766,ENSG00000155090,ENSG00000107338,ENSG00000160957,ENSG00000185736,ENSG00000183508,ENSG00000090520,ENSG00000160932,ENSG00000244405,ENSG00000132196,ENSG00000049130,ENSG00000138814,ENSG00000070614,ENSG00000107863,ENSG00000166598,ENSG00000065989,ENSG00000180730,ENSG00000121073,ENSG00000197070,ENSG00000139684,ENSG00000112232
F345	Endothelia	12106	51	1694	7.13646	11	1.54138	1.69468	0.0916845	ENSG00000151834,ENSG00000155090,ENSG00000090520,ENSG00000160932,ENSG00000049130,ENSG00000116717,ENSG00000107863,ENSG00000166598,ENSG00000126016,ENSG00000169908,ENSG00000128805
F347	Astrocyte	12106	60	1714	8.49496	8	0.941735	0.932449	0.629178	ENSG00000069702,ENSG00000124491,ENSG00000162733,ENSG00000152932,ENSG00000138061,ENSG00000102054,ENSG00000132128,ENSG00000140497
F347	Microglia	12106	60	1566	7.76144	16	2.06147	2.46213	0.00320736	ENSG00000198797,ENSG00000174482,ENSG00000165379,ENSG00000151067,ENSG00000124491,ENSG00000164124,ENSG00000183662,ENSG00000131941,ENSG00000153071,ENSG00000168297,ENSG00000102054,ENSG00000188153,ENSG00000010327,ENSG00000111817,ENSG00000113273,ENSG00000140497
F347	Oligodendrocyte	12106	60	2211	10.9582	14	1.27758	1.36433	0.194402	ENSG00000198797,ENSG00000174482,ENSG00000165379,ENSG00000151067,ENSG00000164124,ENSG00000145147,ENSG00000152932,ENSG00000169855,ENSG00000168297,ENSG00000104859,ENSG00000188153,ENSG00000010327,ENSG00000126215,ENSG00000165495
F347	Neuron	12106	60	5889	29.1872	30	1.02785	1.056	0.467305	ENSG00000111907,ENSG00000198797,ENSG00000164692,ENSG00000110723,ENSG00000165118,ENSG00000174482,ENSG00000165379,ENSG00000143061,ENSG00000151067,ENSG00000124491,ENSG00000091136,ENSG00000145147,ENSG00000108821,ENSG00000153071,ENSG00000152932,ENSG00000169855,ENSG00000139329,ENSG00000119772,ENSG00000168297,ENSG00000122778,ENSG00000142949,ENSG00000138622,ENSG00000132128,ENSG00000188153,ENSG00000186377…
F347	Endothelia	12106	60	1694	8.39584	10	1.19107	1.23061	0.326929	ENSG00000164692,ENSG00000124491,ENSG00000091136,ENSG00000145147,ENSG00000162733,ENSG00000152932,ENSG00000138061,ENSG00000010327,ENSG00000140497,ENSG00000103196
F388	Astrocyte	12106	188	1714	26.6175	21	0.788953	0.759484	0.904764	ENSG00000164181,ENSG00000166086,ENSG00000132470,ENSG00000173786,ENSG00000153048,ENSG00000118298,ENSG00000157985,ENSG00000091428,ENSG00000182667,ENSG00000163827,ENSG00000108379,ENSG00000184985,ENSG00000116977,ENSG00000109906,ENSG00000185737,ENSG00000172426,ENSG00000156298,ENSG00000010810,ENSG00000068903,ENSG00000227051,ENSG00000043355
F388	Microglia	12106	188	1566	24.3192	42	1.72703	1.96191	0.00023314	ENSG00000019144,ENSG00000184144,ENSG00000172005,ENSG00000174607,ENSG00000011426,ENSG00000013297,ENSG00000104419,ENSG00000143382,ENSG00000204655,ENSG00000054690,ENSG00000148180,ENSG00000007944,ENSG00000135926,ENSG00000197430,ENSG00000124920,ENSG00000158859,ENSG00000108381,ENSG00000198121,ENSG00000172508,ENSG00000173786,ENSG00000141540,ENSG00000148408,ENSG00000264522,ENSG00000198825,ENSG00000038382…
F388	Oligodendrocyte	12106	188	2211	34.3357	102	2.97067	5.51528	5.54597e-29	ENSG00000019144,ENSG00000205116,ENSG00000184144,ENSG00000172005,ENSG00000123560,ENSG00000197971,ENSG00000136541,ENSG00000134198,ENSG00000174607,ENSG00000011426,ENSG00000013297,ENSG00000104419,ENSG00000204655,ENSG00000054690,ENSG00000198835,ENSG00000148180,ENSG00000099282,ENSG00000135926,ENSG00000135362,ENSG00000196187,ENSG00000170775,ENSG00000197430,ENSG00000168314,ENSG00000124920,ENSG00000164181…
F388	Neuron	12106	188	5889	91.4532	111	1.21374	1.53181	0.00251585	ENSG00000019144,ENSG00000184144,ENSG00000172005,ENSG00000197971,ENSG00000136541,ENSG00000174607,ENSG00000011426,ENSG00000013297,ENSG00000104419,ENSG00000204655,ENSG00000054690,ENSG00000007944,ENSG00000170775,ENSG00000066322,ENSG00000179364,ENSG00000139629,ENSG00000092871,ENSG00000176381,ENSG00000198753,ENSG00000166086,ENSG00000021300,ENSG00000198121,ENSG00000213186,ENSG00000172508,ENSG00000177105…
F388	Endothelia	12106	188	1694	26.307	32	1.21641	1.26579	0.136427	ENSG00000205116,ENSG00000123560,ENSG00000136541,ENSG00000134198,ENSG00000174607,ENSG00000148180,ENSG00000197430,ENSG00000164181,ENSG00000179178,ENSG00000176381,ENSG00000108381,ENSG00000167641,ENSG00000166086,ENSG00000021300,ENSG00000176058,ENSG00000118298,ENSG00000091428,ENSG00000182667,ENSG00000108379,ENSG00000184985,ENSG00000116977,ENSG00000109906,ENSG00000185737,ENSG00000156298,ENSG00000010810…
F389	Astrocyte	12106	467	1714	66.1191	66	0.998198	0.997818	0.527475	ENSG00000135905,ENSG00000118322,ENSG00000113296,ENSG00000066468,ENSG00000114166,ENSG00000189067,ENSG00000146535,ENSG00000010278,ENSG00000213366,ENSG00000159176,ENSG00000167996,ENSG00000104267,ENSG00000165443,ENSG00000069849,ENSG00000123636,ENSG00000136960,ENSG00000039560,ENSG00000198912,ENSG00000056736,ENSG00000170011,ENSG00000129422,ENSG00000168539,ENSG00000164627,ENSG00000146122,ENSG00000116741…
F389	Microglia	12106	467	1566	60.4099	88	1.45672	1.59619	0.000142267	ENSG00000187764,ENSG00000057704,ENSG00000064651,ENSG00000138593,ENSG00000187239,ENSG00000109458,ENSG00000118322,ENSG00000066468,ENSG00000197892,ENSG00000107679,ENSG00000189067,ENSG00000166348,ENSG00000070214,ENSG00000010278,ENSG00000138756,ENSG00000140600,ENSG00000172548,ENSG00000133874,ENSG00000058404,ENSG00000127311,ENSG00000196872,ENSG00000151062,ENSG00000198168,ENSG00000114541,ENSG00000116266…
F389	Oligodendrocyte	12106	467	2211	85.2913	169	1.98144	2.66504	5.83134e-21	ENSG00000082996,ENSG00000102158,ENSG00000164076,ENSG00000166387,ENSG00000187764,ENSG00000116473,ENSG00000057704,ENSG00000135905,ENSG00000064651,ENSG00000138593,ENSG00000169504,ENSG00000164303,ENSG00000187239,ENSG00000109458,ENSG00000118322,ENSG00000139433,ENSG00000147459,ENSG00000066468,ENSG00000114166,ENSG00000103540,ENSG00000197892,ENSG00000158079,ENSG00000115935,ENSG00000143418,ENSG00000107679…
F389	Neuron	12106	467	5889	227.174	236	1.03885	1.0818	0.215845	ENSG00000164076,ENSG00000172375,ENSG00000116473,ENSG00000163013,ENSG00000135905,ENSG00000064651,ENSG00000164303,ENSG00000187239,ENSG00000109458,ENSG00000143157,ENSG00000185442,ENSG00000139433,ENSG00000147459,ENSG00000175182,ENSG00000177614,ENSG00000066468,ENSG00000236104,ENSG00000085832,ENSG00000158079,ENSG00000143418,ENSG00000107679,ENSG00000189067,ENSG00000225968,ENSG00000166348,ENSG00000070214…
F389	Endothelia	12106	467	1694	65.3476	71	1.0865	1.10649	0.239292	ENSG00000135905,ENSG00000169504,ENSG00000118322,ENSG00000113296,ENSG00000066468,ENSG00000114166,ENSG00000166348,ENSG00000146535,ENSG00000138756,ENSG00000213366,ENSG00000140600,ENSG00000159176,ENSG00000165195,ENSG00000104267,ENSG00000165443,ENSG00000069849,ENSG00000123636,ENSG00000039560,ENSG00000198912,ENSG00000056736,ENSG00000158747,ENSG00000127920,ENSG00000170011,ENSG00000152558,ENSG00000129422…
F391	Astrocyte	12106	107	1714	15.1493	13	0.858123	0.837279	0.76508	ENSG00000139737,ENSG00000118523,ENSG00000136895,ENSG00000116885,ENSG00000168615,ENSG00000089472,ENSG00000144468,ENSG00000084112,ENSG00000121742,ENSG00000183230,ENSG00000183762,ENSG00000137802,ENSG00000173208
F391	Microglia	12106	107	1566	13.8412	11	0.794727	0.769603	0.832947	ENSG00000139737,ENSG00000107331,ENSG00000152128,ENSG00000152315,ENSG00000130052,ENSG00000162924,ENSG00000257923,ENSG00000060656,ENSG00000198668,ENSG00000140807,ENSG00000105514
F391	Oligodendrocyte	12106	107	2211	19.5421	32	1.63749	1.92261	0.0022327	ENSG00000126391,ENSG00000150764,ENSG00000180929,ENSG00000163531,ENSG00000181915,ENSG00000156804,ENSG00000139737,ENSG00000134294,ENSG00000170522,ENSG00000107331,ENSG00000152128,ENSG00000136895,ENSG00000113319,ENSG00000106829,ENSG00000166471,ENSG00000107438,ENSG00000156687,ENSG00000139438,ENSG00000146416,ENSG00000153132,ENSG00000157693,ENSG00000113231,ENSG00000108947,ENSG00000162924,ENSG00000099219…
F391	Neuron	12106	107	5889	52.0505	56	1.07588	1.16071	0.251314	ENSG00000131378,ENSG00000164754,ENSG00000150764,ENSG00000181826,ENSG00000180929,ENSG00000163531,ENSG00000181915,ENSG00000156804,ENSG00000139737,ENSG00000148158,ENSG00000107331,ENSG00000152128,ENSG00000168575,ENSG00000136895,ENSG00000113319,ENSG00000106829,ENSG00000087266,ENSG00000188786,ENSG00000137411,ENSG00000156687,ENSG00000122012,ENSG00000163811,ENSG00000146416,ENSG00000113231,ENSG00000137266…
F391	Endothelia	12106	107	1694	14.9726	21	1.40256	1.50709	0.0655635	ENSG00000139737,ENSG00000118523,ENSG00000107331,ENSG00000135245,ENSG00000136895,ENSG00000106829,ENSG00000130052,ENSG00000156687,ENSG00000196411,ENSG00000188157,ENSG00000089472,ENSG00000162591,ENSG00000099219,ENSG00000076706,ENSG00000128052,ENSG00000121742,ENSG00000183230,ENSG00000137802,ENSG00000180616,ENSG00000140807,ENSG00000173208
F392	Astrocyte	12106	102	1714	14.4414	8	0.553962	0.513755	0.982624	ENSG00000150967,ENSG00000135390,ENSG00000111716,ENSG00000129159,ENSG00000183826,ENSG00000100316,ENSG00000146250,ENSG00000134532
F392	Microglia	12106	102	1566	13.1944	11	0.833684	0.812274	0.783858	ENSG00000078725,ENSG00000106993,ENSG00000184349,ENSG00000183826,ENSG00000125869,ENSG00000182348,ENSG00000132938,ENSG00000089041,ENSG00000169896,ENSG00000101463,ENSG00000187867
F392	Oligodendrocyte	12106	102	2211	18.6289	20	1.0736	1.0924	0.401498	ENSG00000036530,ENSG00000078725,ENSG00000163235,ENSG00000149084,ENSG00000116560,ENSG00000106993,ENSG00000182247,ENSG00000219438,ENSG00000135390,ENSG00000111716,ENSG00000139350,ENSG00000095209,ENSG00000182348,ENSG00000151239,ENSG00000168496,ENSG00000100316,ENSG00000089041,ENSG00000134532,ENSG00000160783,ENSG00000101463
F392	Neuron	12106	102	5889	49.6182	51	1.02785	1.0562	0.430089	ENSG00000156983,ENSG00000171992,ENSG00000115194,ENSG00000036530,ENSG00000055118,ENSG00000078725,ENSG00000163235,ENSG00000149084,ENSG00000121905,ENSG00000108509,ENSG00000182247,ENSG00000064652,ENSG00000112304,ENSG00000004660,ENSG00000137825,ENSG00000144746,ENSG00000143815,ENSG00000150967,ENSG00000087053,ENSG00000184349,ENSG00000134287,ENSG00000110076,ENSG00000135390,ENSG00000111716,ENSG00000134253…
F392	Endothelia	12106	102	1694	14.2729	8	0.560502	0.520859	0.980617	ENSG00000182247,ENSG00000248485,ENSG00000135390,ENSG00000111716,ENSG00000129159,ENSG00000132938,ENSG00000183323,ENSG00000134532
F394	Astrocyte	12106	155	1714	21.9453	17	0.774653	0.744374	0.900124	ENSG00000163697,ENSG00000184005,ENSG00000164161,ENSG00000164199,ENSG00000114200,ENSG00000154678,ENSG00000117707,ENSG00000110931,ENSG00000155849,ENSG00000111846,ENSG00000086205,ENSG00000178538,ENSG00000142867,ENSG00000123384,ENSG00000106688,ENSG00000124126,ENSG00000159231
F394	Microglia	12106	155	1566	20.0504	26	1.29673	1.36252	0.0975741	ENSG00000113369,ENSG00000184005,ENSG00000154493,ENSG00000164161,ENSG00000122545,ENSG00000154678,ENSG00000171509,ENSG00000150867,ENSG00000117707,ENSG00000182263,ENSG00000197283,ENSG00000155849,ENSG00000144230,ENSG00000111846,ENSG00000121440,ENSG00000172379,ENSG00000143878,ENSG00000169744,ENSG00000157600,ENSG00000086205,ENSG00000135324,ENSG00000164535,ENSG00000081237,ENSG00000187164,ENSG00000141622…
F394	Oligodendrocyte	12106	155	2211	28.3087	46	1.62494	1.90735	0.000340748	ENSG00000113369,ENSG00000175928,ENSG00000163697,ENSG00000147488,ENSG00000080819,ENSG00000154493,ENSG00000164161,ENSG00000001561,ENSG00000130962,ENSG00000122545,ENSG00000106069,ENSG00000164199,ENSG00000114200,ENSG00000154678,ENSG00000182568,ENSG00000112877,ENSG00000116574,ENSG00000118961,ENSG00000150867,ENSG00000110931,ENSG00000182263,ENSG00000146918,ENSG00000076554,ENSG00000155849,ENSG00000133104…
F394	Neuron	12106	155	5889	75.4002	81	1.07427	1.15771	0.204704	ENSG00000163697,ENSG00000147488,ENSG00000112659,ENSG00000158186,ENSG00000184005,ENSG00000114923,ENSG00000154493,ENSG00000001561,ENSG00000157350,ENSG00000115993,ENSG00000067840,ENSG00000122545,ENSG00000106069,ENSG00000146216,ENSG00000169762,ENSG00000124313,ENSG00000182606,ENSG00000136848,ENSG00000131504,ENSG00000154678,ENSG00000182568,ENSG00000116574,ENSG00000171509,ENSG00000118961,ENSG00000150867…
F394	Endothelia	12106	155	1694	21.6892	20	0.922116	0.909494	0.687739	ENSG00000163697,ENSG00000184005,ENSG00000164161,ENSG00000122545,ENSG00000164199,ENSG00000117707,ENSG00000155849,ENSG00000155111,ENSG00000129625,ENSG00000111846,ENSG00000037280,ENSG00000143878,ENSG00000086205,ENSG00000132718,ENSG00000142867,ENSG00000081237,ENSG00000123384,ENSG00000106688,ENSG00000124126,ENSG00000159231
F396	Astrocyte	12106	85	1714	12.0345	12	0.997131	0.996636	0.551846	ENSG00000110651,ENSG00000113387,ENSG00000076716,ENSG00000149557,ENSG00000164309,ENSG00000185813,ENSG00000118922,ENSG00000168959,ENSG00000173482,ENSG00000105357,ENSG00000154914,ENSG00000130055
F396	Microglia	12106	85	1566	10.9954	17	1.5461	1.69003	0.0429527	ENSG00000033122,ENSG00000172260,ENSG00000181409,ENSG00000081026,ENSG00000136750,ENSG00000078269,ENSG00000119698,ENSG00000110651,ENSG00000113387,ENSG00000118922,ENSG00000171016,ENSG00000198785,ENSG00000168959,ENSG00000140538,ENSG00000100027,ENSG00000277363,ENSG00000141510
F396	Oligodendrocyte	12106	85	2211	15.5241	34	2.19014	3.01394	2.19969e-06	ENSG00000211584,ENSG00000033122,ENSG00000112379,ENSG00000172260,ENSG00000181409,ENSG00000136938,ENSG00000135636,ENSG00000171848,ENSG00000136750,ENSG00000165175,ENSG00000150510,ENSG00000135924,ENSG00000122042,ENSG00000172331,ENSG00000078269,ENSG00000112561,ENSG00000110651,ENSG00000179295,ENSG00000149557,ENSG00000185813,ENSG00000118922,ENSG00000204381,ENSG00000172782,ENSG00000198785,ENSG00000137106…
F396	Neuron	12106	85	5889	41.3485	48	1.16086	1.37255	0.0901403	ENSG00000211584,ENSG00000033122,ENSG00000112379,ENSG00000163491,ENSG00000186298,ENSG00000172260,ENSG00000149187,ENSG00000050030,ENSG00000213088,ENSG00000171848,ENSG00000102780,ENSG00000197226,ENSG00000081026,ENSG00000136750,ENSG00000165175,ENSG00000152402,ENSG00000150510,ENSG00000135924,ENSG00000122042,ENSG00000172331,ENSG00000078269,ENSG00000119698,ENSG00000205189,ENSG00000110651,ENSG00000113387…
F396	Endothelia	12106	85	1694	11.8941	17	1.42928	1.54197	0.0788126	ENSG00000135636,ENSG00000102780,ENSG00000110651,ENSG00000076716,ENSG00000149557,ENSG00000185813,ENSG00000118922,ENSG00000204381,ENSG00000213928,ENSG00000172159,ENSG00000173848,ENSG00000168959,ENSG00000173482,ENSG00000105357,ENSG00000277363,ENSG00000130055,ENSG00000105287
F397	Astrocyte	12106	83	1714	11.7514	11	0.936062	0.925808	0.641605	ENSG00000136535,ENSG00000196517,ENSG00000157103,ENSG00000111249,ENSG00000109919,ENSG00000081320,ENSG00000152578,ENSG00000139514,ENSG00000184226,ENSG00000125841,ENSG00000149633
F397	Microglia	12106	83	1566	10.7367	15	1.39708	1.4893	0.11132	ENSG00000172348,ENSG00000173852,ENSG00000196517,ENSG00000151572,ENSG00000171408,ENSG00000124374,ENSG00000198944,ENSG00000143772,ENSG00000144554,ENSG00000081320,ENSG00000152578,ENSG00000178573,ENSG00000184226,ENSG00000141696,ENSG00000171246
F397	Oligodendrocyte	12106	83	2211	15.1588	31	2.04501	2.69142	3.08456e-05	ENSG00000188706,ENSG00000144227,ENSG00000172348,ENSG00000159788,ENSG00000136535,ENSG00000074706,ENSG00000173852,ENSG00000149218,ENSG00000138801,ENSG00000158321,ENSG00000177156,ENSG00000151572,ENSG00000140743,ENSG00000171408,ENSG00000157103,ENSG00000124374,ENSG00000184343,ENSG00000111249,ENSG00000171094,ENSG00000111262,ENSG00000143772,ENSG00000137460,ENSG00000144554,ENSG00000169291,ENSG00000145386…
F397	Neuron	12106	83	5889	40.3756	49	1.2136	1.52576	0.0365599	ENSG00000188706,ENSG00000144227,ENSG00000172348,ENSG00000159788,ENSG00000136535,ENSG00000074706,ENSG00000173852,ENSG00000128573,ENSG00000004399,ENSG00000149218,ENSG00000138801,ENSG00000158321,ENSG00000158292,ENSG00000112139,ENSG00000177156,ENSG00000151572,ENSG00000166736,ENSG00000171408,ENSG00000170113,ENSG00000167522,ENSG00000157103,ENSG00000100599,ENSG00000111249,ENSG00000136274,ENSG00000135299…
F397	Endothelia	12106	83	1694	11.6142	12	1.03321	1.03911	0.499287	ENSG00000159788,ENSG00000136535,ENSG00000128573,ENSG00000196517,ENSG00000157103,ENSG00000111249,ENSG00000081320,ENSG00000152578,ENSG00000178573,ENSG00000139514,ENSG00000184226,ENSG00000074181
F398	Astrocyte	12106	69	1714	9.76921	9	0.921262	0.908959	0.657267	ENSG00000196083,ENSG00000083896,ENSG00000155959,ENSG00000197956,ENSG00000166128,ENSG00000020577,ENSG00000138617,ENSG00000169860,ENSG00000017483
F398	Microglia	12106	69	1566	8.92566	9	1.00833	1.00963	0.543423	ENSG00000196083,ENSG00000072195,ENSG00000160691,ENSG00000107957,ENSG00000171877,ENSG00000096060,ENSG00000067141,ENSG00000155926,ENSG00000116017
F398	Oligodendrocyte	12106	69	2211	12.6019	15	1.19029	1.24479	0.269594	ENSG00000182504,ENSG00000196083,ENSG00000069020,ENSG00000143819,ENSG00000164176,ENSG00000072042,ENSG00000112902,ENSG00000166128,ENSG00000137571,ENSG00000066629,ENSG00000171877,ENSG00000162946,ENSG00000017483,ENSG00000154642,ENSG00000155926
F398	Neuron	12106	69	5889	33.5653	34	1.01295	1.02569	0.505848	ENSG00000069020,ENSG00000155959,ENSG00000164176,ENSG00000072195,ENSG00000064309,ENSG00000166897,ENSG00000197956,ENSG00000112902,ENSG00000137571,ENSG00000131374,ENSG00000162522,ENSG00000140332,ENSG00000020577,ENSG00000126861,ENSG00000136238,ENSG00000115827,ENSG00000066629,ENSG00000072756,ENSG00000160691,ENSG00000148426,ENSG00000107957,ENSG00000084774,ENSG00000171877,ENSG00000146950,ENSG00000096060…
F398	Endothelia	12106	69	1694	9.65521	6	0.621426	0.58392	0.93407	ENSG00000166128,ENSG00000020577,ENSG00000171877,ENSG00000162946,ENSG00000179044,ENSG00000017483
F399	Astrocyte	12106	105	1714	14.8662	17	1.14354	1.17294	0.313789	ENSG00000152822,ENSG00000171863,ENSG00000170579,ENSG00000108669,ENSG00000150471,ENSG00000169760,ENSG00000166925,ENSG00000169032,ENSG00000173402,ENSG00000163710,ENSG00000177830,ENSG00000164188,ENSG00000111450,ENSG00000154229,ENSG00000100364,ENSG00000171724,ENSG00000183098
F399	Microglia	12106	105	1566	13.5825	26	1.91422	2.23543	0.00069749	ENSG00000083444,ENSG00000139220,ENSG00000171863,ENSG00000154027,ENSG00000108669,ENSG00000149970,ENSG00000114251,ENSG00000169760,ENSG00000196220,ENSG00000136267,ENSG00000166925,ENSG00000164889,ENSG00000153234,ENSG00000144583,ENSG00000169241,ENSG00000122574,ENSG00000273079,ENSG00000143322,ENSG00000128815,ENSG00000105738,ENSG00000101746,ENSG00000122367,ENSG00000183098,ENSG00000121281,ENSG00000206052…
F399	Oligodendrocyte	12106	105	2211	19.1769	33	1.72082	2.06703	0.000754059	ENSG00000139220,ENSG00000170579,ENSG00000058091,ENSG00000154027,ENSG00000152127,ENSG00000077157,ENSG00000150471,ENSG00000169760,ENSG00000136267,ENSG00000166925,ENSG00000073910,ENSG00000130226,ENSG00000143409,ENSG00000113805,ENSG00000164889,ENSG00000144583,ENSG00000102032,ENSG00000151623,ENSG00000114019,ENSG00000273079,ENSG00000134909,ENSG00000128815,ENSG00000129250,ENSG00000153790,ENSG00000156076…
F399	Neuron	12106	105	5889	51.0776	62	1.21384	1.52766	0.0203687	ENSG00000083444,ENSG00000152822,ENSG00000139220,ENSG00000170579,ENSG00000058091,ENSG00000154027,ENSG00000152127,ENSG00000108669,ENSG00000149970,ENSG00000077157,ENSG00000143013,ENSG00000025039,ENSG00000150471,ENSG00000169760,ENSG00000196220,ENSG00000136267,ENSG00000166925,ENSG00000073910,ENSG00000130226,ENSG00000177272,ENSG00000169032,ENSG00000113805,ENSG00000153234,ENSG00000173402,ENSG00000198793…
F399	Endothelia	12106	105	1694	14.6927	21	1.42928	1.54327	0.0553672	ENSG00000139220,ENSG00000171863,ENSG00000108669,ENSG00000025039,ENSG00000150471,ENSG00000136267,ENSG00000166925,ENSG00000073910,ENSG00000130226,ENSG00000169032,ENSG00000173402,ENSG00000151623,ENSG00000128815,ENSG00000164188,ENSG00000095794,ENSG00000111450,ENSG00000164850,ENSG00000154229,ENSG00000100364,ENSG00000171724,ENSG00000183098
F400	Astrocyte	12106	121	1714	17.1315	19	1.10907	1.13079	0.350055	ENSG00000163219,ENSG00000106689,ENSG00000078549,ENSG00000172638,ENSG00000113721,ENSG00000185985,ENSG00000105894,ENSG00000116117,ENSG00000147526,ENSG00000104324,ENSG00000166436,ENSG00000183044,ENSG00000137573,ENSG00000176533,ENSG00000167434,ENSG00000095585,ENSG00000141449,ENSG00000148225,ENSG00000160201
F400	Microglia	12106	121	1566	15.6522	26	1.6611	1.85609	0.00582009	ENSG00000163219,ENSG00000182601,ENSG00000134207,ENSG00000026652,ENSG00000123684,ENSG00000107282,ENSG00000117266,ENSG00000113721,ENSG00000152910,ENSG00000197555,ENSG00000105875,ENSG00000175745,ENSG00000065911,ENSG00000008513,ENSG00000104324,ENSG00000103528,ENSG00000136636,ENSG00000090530,ENSG00000174600,ENSG00000157483,ENSG00000176533,ENSG00000095585,ENSG00000141449,ENSG00000205517,ENSG00000205730…
F400	Oligodendrocyte	12106	121	2211	22.099	29	1.31227	1.41612	0.068514	ENSG00000189337,ENSG00000113100,ENSG00000026652,ENSG00000146469,ENSG00000106689,ENSG00000145526,ENSG00000070808,ENSG00000117266,ENSG00000163873,ENSG00000104490,ENSG00000115295,ENSG00000105894,ENSG00000152910,ENSG00000197555,ENSG00000072657,ENSG00000106415,ENSG00000048540,ENSG00000155886,ENSG00000185100,ENSG00000143401,ENSG00000183044,ENSG00000123066,ENSG00000111445,ENSG00000103995,ENSG00000141524…
F400	Neuron	12106	121	5889	58.8608	75	1.27419	1.73046	0.00207159	ENSG00000189337,ENSG00000113100,ENSG00000177519,ENSG00000163219,ENSG00000152154,ENSG00000182601,ENSG00000134207,ENSG00000026652,ENSG00000146469,ENSG00000123684,ENSG00000106689,ENSG00000145526,ENSG00000182575,ENSG00000107282,ENSG00000164465,ENSG00000078549,ENSG00000070808,ENSG00000172638,ENSG00000085117,ENSG00000153266,ENSG00000170381,ENSG00000163873,ENSG00000104490,ENSG00000138669,ENSG00000115295…
F400	Endothelia	12106	121	1694	16.9316	25	1.47653	1.60954	0.0275344	ENSG00000177519,ENSG00000163219,ENSG00000152154,ENSG00000106689,ENSG00000145526,ENSG00000078549,ENSG00000117266,ENSG00000150048,ENSG00000113721,ENSG00000105894,ENSG00000197555,ENSG00000072657,ENSG00000116117,ENSG00000155886,ENSG00000147526,ENSG00000185100,ENSG00000104324,ENSG00000166436,ENSG00000174600,ENSG00000183044,ENSG00000157483,ENSG00000167434,ENSG00000069188,ENSG00000095585,ENSG00000141449
F402	Astrocyte	12106	56	1714	7.92863	8	1.009	1.01055	0.547382	ENSG00000172037,ENSG00000115457,ENSG00000113758,ENSG00000137831,ENSG00000092964,ENSG00000177469,ENSG00000141736,ENSG00000070601
F402	Microglia	12106	56	1566	7.24401	8	1.10436	1.12234	0.440002	ENSG00000143507,ENSG00000110958,ENSG00000164211,ENSG00000146112,ENSG00000101670,ENSG00000091106,ENSG00000100320,ENSG00000205726
F402	Oligodendrocyte	12106	56	2211	10.2277	11	1.07552	1.09446	0.448032	ENSG00000116209,ENSG00000136824,ENSG00000165410,ENSG00000115457,ENSG00000092964,ENSG00000149452,ENSG00000107362,ENSG00000100320,ENSG00000197256,ENSG00000188559,ENSG00000205726
F402	Neuron	12106	56	5889	27.2414	27	0.99114	0.982811	0.578173	ENSG00000116209,ENSG00000143507,ENSG00000145545,ENSG00000172037,ENSG00000110958,ENSG00000115457,ENSG00000079432,ENSG00000164211,ENSG00000141503,ENSG00000116954,ENSG00000146112,ENSG00000132359,ENSG00000113758,ENSG00000137831,ENSG00000138378,ENSG00000180329,ENSG00000092964,ENSG00000133816,ENSG00000107758,ENSG00000149452,ENSG00000157916,ENSG00000159596,ENSG00000165572,ENSG00000183741,ENSG00000100320…
F402	Endothelia	12106	56	1694	7.83611	10	1.27614	1.33813	0.251611	ENSG00000172037,ENSG00000115457,ENSG00000113758,ENSG00000137831,ENSG00000138378,ENSG00000092964,ENSG00000177469,ENSG00000107758,ENSG00000149452,ENSG00000070601
F533	Astrocyte	12106	76	1714	10.7603	11	1.02228	1.02622	0.518559	ENSG00000127837,ENSG00000143797,ENSG00000162944,ENSG00000089693,ENSG00000175334,ENSG00000204116,ENSG00000139289,ENSG00000134333,ENSG00000101460,ENSG00000160888,ENSG00000088833
F533	Microglia	12106	76	1566	9.83116	7	0.712022	0.681402	0.877035	ENSG00000162944,ENSG00000108654,ENSG00000116649,ENSG00000173611,ENSG00000163106,ENSG00000101460,ENSG00000160888
F533	Oligodendrocyte	12106	76	2211	13.8804	9	0.648397	0.599562	0.952065	ENSG00000145725,ENSG00000143797,ENSG00000106089,ENSG00000173611,ENSG00000092445,ENSG00000139289,ENSG00000146350,ENSG00000160888,ENSG00000157734
F533	Neuron	12106	76	5889	36.9704	39	1.0549	1.1135	0.362154	ENSG00000115524,ENSG00000115694,ENSG00000155545,ENSG00000172531,ENSG00000250510,ENSG00000143797,ENSG00000157107,ENSG00000162944,ENSG00000108654,ENSG00000147162,ENSG00000106089,ENSG00000173621,ENSG00000116649,ENSG00000082014,ENSG00000105974,ENSG00000114867,ENSG00000173611,ENSG00000108506,ENSG00000177082,ENSG00000101639,ENSG00000092445,ENSG00000111341,ENSG00000139289,ENSG00000163106,ENSG00000143379…
F533	Endothelia	12106	76	1694	10.6347	11	1.03435	1.04043	0.50193	ENSG00000143797,ENSG00000162944,ENSG00000108654,ENSG00000106089,ENSG00000105974,ENSG00000110906,ENSG00000204116,ENSG00000111341,ENSG00000139289,ENSG00000160888,ENSG00000105655
F535	Astrocyte	12106	51	1714	7.22072	4	0.553962	0.514892	0.943214	ENSG00000172602,ENSG00000132002,ENSG00000110492,ENSG00000167074
F535	Microglia	12106	51	1566	6.59722	3	0.454737	0.419567	0.968861	ENSG00000203727,ENSG00000167680,ENSG00000176108
F535	Oligodendrocyte	12106	51	2211	9.31447	5	0.536799	0.485316	0.96847	ENSG00000151746,ENSG00000183087,ENSG00000080839,ENSG00000132002,ENSG00000110492
F535	Neuron	12106	51	5889	24.8091	29	1.16893	1.39349	0.15005	ENSG00000151746,ENSG00000113763,ENSG00000106348,ENSG00000196642,ENSG00000177169,ENSG00000067221,ENSG00000183087,ENSG00000152102,ENSG00000099817,ENSG00000205250,ENSG00000172247,ENSG00000123989,ENSG00000172602,ENSG00000080839,ENSG00000158856,ENSG00000136381,ENSG00000071794,ENSG00000132002,ENSG00000153786,ENSG00000072121,ENSG00000110492,ENSG00000105723,ENSG00000087494,ENSG00000203727,ENSG00000185800…
F535	Endothelia	12106	51	1694	7.13646	3	0.420376	0.383078	0.98045	ENSG00000132002,ENSG00000110492,ENSG00000167074
F595	Astrocyte	12106	53	1714	7.50388	6	0.799586	0.773223	0.780331	ENSG00000141552,ENSG00000128463,ENSG00000134056,ENSG00000145681,ENSG00000100142,ENSG00000171885
F595	Microglia	12106	53	1566	6.85594	8	1.16687	1.19752	0.377955	ENSG00000164032,ENSG00000197457,ENSG00000145390,ENSG00000139233,ENSG00000111731,ENSG00000162927,ENSG00000059377,ENSG00000100142
F595	Oligodendrocyte	12106	53	2211	9.67975	3	0.309926	0.267545	0.998168	ENSG00000059377,ENSG00000166224,ENSG00000127616
F595	Neuron	12106	53	5889	25.782	26	1.00846	1.01667	0.530415	ENSG00000065518,ENSG00000168924,ENSG00000197457,ENSG00000105220,ENSG00000168769,ENSG00000114650,ENSG00000161011,ENSG00000145390,ENSG00000136878,ENSG00000134056,ENSG00000128891,ENSG00000128581,ENSG00000073670,ENSG00000083312,ENSG00000087085,ENSG00000111731,ENSG00000182117,ENSG00000130560,ENSG00000101421,ENSG00000148814,ENSG00000126107,ENSG00000159733,ENSG00000169427,ENSG00000105325,ENSG00000127616…
F595	Endothelia	12106	53	1694	7.41632	5	0.674189	0.639206	0.881134	ENSG00000145390,ENSG00000146242,ENSG00000145681,ENSG00000100142,ENSG00000171885
F660	Astrocyte	12106	76	1714	10.7603	6	0.557606	0.518023	0.967381	ENSG00000078177,ENSG00000172461,ENSG00000153253,ENSG00000150433,ENSG00000166165,ENSG00000196935
F660	Microglia	12106	76	1566	9.83116	6	0.610304	0.575297	0.93981	ENSG00000078177,ENSG00000185818,ENSG00000158987,ENSG00000172461,ENSG00000198919,ENSG00000140044
F660	Oligodendrocyte	12106	76	2211	13.8804	8	0.576353	0.524821	0.977717	ENSG00000107902,ENSG00000069424,ENSG00000172461,ENSG00000172469,ENSG00000153253,ENSG00000166165,ENSG00000135048,ENSG00000196935
F660	Neuron	12106	76	5889	36.9704	44	1.19014	1.45493	0.0662903	ENSG00000078177,ENSG00000115904,ENSG00000144228,ENSG00000185818,ENSG00000138623,ENSG00000171159,ENSG00000116586,ENSG00000197530,ENSG00000158987,ENSG00000048140,ENSG00000161642,ENSG00000174996,ENSG00000131584,ENSG00000137845,ENSG00000029534,ENSG00000107902,ENSG00000069424,ENSG00000172461,ENSG00000177706,ENSG00000162817,ENSG00000139405,ENSG00000105778,ENSG00000131725,ENSG00000184840,ENSG00000008952…
F660	Endothelia	12106	76	1694	10.6347	7	0.658221	0.622007	0.921803	ENSG00000137845,ENSG00000172461,ENSG00000162817,ENSG00000153253,ENSG00000166165,ENSG00000196935,ENSG00000138606
F718	Astrocyte	12106	61	1714	8.63654	11	1.27366	1.33598	0.23905	ENSG00000172757,ENSG00000143420,ENSG00000189043,ENSG00000005022,ENSG00000092096,ENSG00000169567,ENSG00000046653,ENSG00000169991,ENSG00000100362,ENSG00000165566,ENSG00000140479
F718	Microglia	12106	61	1566	7.8908	7	0.887109	0.871882	0.690234	ENSG00000172757,ENSG00000140262,ENSG00000102003,ENSG00000189043,ENSG00000065413,ENSG00000046653,ENSG00000140479
F718	Oligodendrocyte	12106	61	2211	11.1408	8	0.718079	0.674369	0.890815	ENSG00000178449,ENSG00000140262,ENSG00000102003,ENSG00000189043,ENSG00000005022,ENSG00000065413,ENSG00000046653,ENSG00000140479
F718	Neuron	12106	61	5889	29.6736	32	1.0784	1.16579	0.31938	ENSG00000121769,ENSG00000175756,ENSG00000151366,ENSG00000065243,ENSG00000172757,ENSG00000130224,ENSG00000143420,ENSG00000198160,ENSG00000140262,ENSG00000106992,ENSG00000148334,ENSG00000166889,ENSG00000102003,ENSG00000198791,ENSG00000189043,ENSG00000005022,ENSG00000131174,ENSG00000059122,ENSG00000100604,ENSG00000065413,ENSG00000092096,ENSG00000141504,ENSG00000100591,ENSG00000169567,ENSG00000046653…
F718	Endothelia	12106	61	1694	8.53577	7	0.820079	0.795926	0.768387	ENSG00000065243,ENSG00000172757,ENSG00000065413,ENSG00000092096,ENSG00000046653,ENSG00000100362,ENSG00000140479
F719	Astrocyte	12106	79	1714	11.185	14	1.25167	1.30836	0.221644	ENSG00000011009,ENSG00000107874,ENSG00000167792,ENSG00000164190,ENSG00000151729,ENSG00000126432,ENSG00000105701,ENSG00000277791,ENSG00000090238,ENSG00000100852,ENSG00000079462,ENSG00000137942,ENSG00000159140,ENSG00000104679
F719	Microglia	12106	79	1566	10.2192	7	0.684983	0.652825	0.900105	ENSG00000126432,ENSG00000142507,ENSG00000102531,ENSG00000152492,ENSG00000079462,ENSG00000264364,ENSG00000172009
F719	Oligodendrocyte	12106	79	2211	14.4283	10	0.693082	0.647029	0.930724	ENSG00000009413,ENSG00000102531,ENSG00000137478,ENSG00000100852,ENSG00000123159,ENSG00000110921,ENSG00000277972,ENSG00000130540,ENSG00000125835,ENSG00000264364
F719	Neuron	12106	79	5889	38.4298	43	1.11892	1.26286	0.178994	ENSG00000011009,ENSG00000131023,ENSG00000167792,ENSG00000106263,ENSG00000164190,ENSG00000009413,ENSG00000130204,ENSG00000166548,ENSG00000151729,ENSG00000122417,ENSG00000083097,ENSG00000277791,ENSG00000137409,ENSG00000090238,ENSG00000137478,ENSG00000126768,ENSG00000115226,ENSG00000162729,ENSG00000100852,ENSG00000198055,ENSG00000133243,ENSG00000122779,ENSG00000157954,ENSG00000105576,ENSG00000028310…
F719	Endothelia	12106	79	1694	11.0545	11	0.995068	0.994233	0.556539	ENSG00000167792,ENSG00000164190,ENSG00000126432,ENSG00000090238,ENSG00000137478,ENSG00000100852,ENSG00000137942,ENSG00000138767,ENSG00000130540,ENSG00000159140,ENSG00000104679
F797	Astrocyte	12106	57	1714	8.07021	17	2.10651	2.59222	0.00172864	ENSG00000175550,ENSG00000068976,ENSG00000174748,ENSG00000106153,ENSG00000149806,ENSG00000130520,ENSG00000144713,ENSG00000103489,ENSG00000105372,ENSG00000088727,ENSG00000254858,ENSG00000197958,ENSG00000198838,ENSG00000128585,ENSG00000167775,ENSG00000175267,ENSG00000146828
F797	Microglia	12106	57	1566	7.37337	7	0.949363	0.942012	0.618218	ENSG00000174748,ENSG00000149806,ENSG00000198586,ENSG00000105372,ENSG00000106617,ENSG00000198838,ENSG00000128585
F797	Oligodendrocyte	12106	57	2211	10.4103	13	1.24876	1.32413	0.230985	ENSG00000246705,ENSG00000149806,ENSG00000130520,ENSG00000198586,ENSG00000173517,ENSG00000103489,ENSG00000105372,ENSG00000171681,ENSG00000198838,ENSG00000167588,ENSG00000128585,ENSG00000145348,ENSG00000139998
F797	Neuron	12106	57	5889	27.7278	37	1.3344	1.95894	0.00964	ENSG00000102109,ENSG00000175550,ENSG00000174748,ENSG00000143774,ENSG00000167658,ENSG00000149806,ENSG00000130520,ENSG00000066557,ENSG00000198586,ENSG00000175602,ENSG00000144713,ENSG00000173517,ENSG00000103489,ENSG00000115159,ENSG00000074855,ENSG00000134480,ENSG00000131143,ENSG00000105372,ENSG00000116406,ENSG00000177380,ENSG00000157500,ENSG00000182087,ENSG00000118454,ENSG00000197958,ENSG00000106617…
F797	Endothelia	12106	57	1694	7.97604	5	0.626877	0.589812	0.91603	ENSG00000103489,ENSG00000131143,ENSG00000105372,ENSG00000198838,ENSG00000128585
F1035	Astrocyte	12106	121	1714	17.1315	13	0.758836	0.72776	0.891061	ENSG00000164181,ENSG00000166086,ENSG00000132470,ENSG00000173786,ENSG00000153048,ENSG00000118298,ENSG00000157985,ENSG00000091428,ENSG00000108379,ENSG00000184985,ENSG00000068903,ENSG00000227051,ENSG00000043355
F1035	Microglia	12106	121	1566	15.6522	36	2.29999	2.89376	8.137e-07	ENSG00000019144,ENSG00000184144,ENSG00000172005,ENSG00000174607,ENSG00000011426,ENSG00000013297,ENSG00000104419,ENSG00000143382,ENSG00000204655,ENSG00000054690,ENSG00000148180,ENSG00000007944,ENSG00000135926,ENSG00000197430,ENSG00000124920,ENSG00000158859,ENSG00000108381,ENSG00000198121,ENSG00000172508,ENSG00000173786,ENSG00000141540,ENSG00000148408,ENSG00000264522,ENSG00000198825,ENSG00000038382…
F1035	Oligodendrocyte	12106	121	2211	22.099	83	3.75582	10.1117	3.75915e-34	ENSG00000019144,ENSG00000205116,ENSG00000184144,ENSG00000172005,ENSG00000123560,ENSG00000197971,ENSG00000136541,ENSG00000134198,ENSG00000174607,ENSG00000011426,ENSG00000013297,ENSG00000104419,ENSG00000204655,ENSG00000054690,ENSG00000198835,ENSG00000148180,ENSG00000099282,ENSG00000135926,ENSG00000135362,ENSG00000196187,ENSG00000170775,ENSG00000197430,ENSG00000168314,ENSG00000124920,ENSG00000164181…
F1035	Neuron	12106	121	5889	58.8608	69	1.17226	1.40553	0.0389631	ENSG00000019144,ENSG00000184144,ENSG00000172005,ENSG00000197971,ENSG00000136541,ENSG00000174607,ENSG00000011426,ENSG00000013297,ENSG00000104419,ENSG00000204655,ENSG00000054690,ENSG00000007944,ENSG00000170775,ENSG00000066322,ENSG00000179364,ENSG00000139629,ENSG00000092871,ENSG00000176381,ENSG00000198753,ENSG00000166086,ENSG00000021300,ENSG00000198121,ENSG00000213186,ENSG00000172508,ENSG00000177105…
F1035	Endothelia	12106	121	1694	16.9316	24	1.41747	1.52818	0.0465629	ENSG00000205116,ENSG00000123560,ENSG00000136541,ENSG00000134198,ENSG00000174607,ENSG00000148180,ENSG00000197430,ENSG00000164181,ENSG00000179178,ENSG00000176381,ENSG00000108381,ENSG00000167641,ENSG00000166086,ENSG00000021300,ENSG00000176058,ENSG00000118298,ENSG00000091428,ENSG00000108379,ENSG00000184985,ENSG00000006042,ENSG00000078804,ENSG00000100146,ENSG00000068903,ENSG00000227051
F1040	Astrocyte	12106	145	1714	20.5295	20	0.974208	0.969728	0.587053	ENSG00000135905,ENSG00000118322,ENSG00000066468,ENSG00000114166,ENSG00000189067,ENSG00000010278,ENSG00000213366,ENSG00000167996,ENSG00000104267,ENSG00000069849,ENSG00000123636,ENSG00000136960,ENSG00000198912,ENSG00000164627,ENSG00000167191,ENSG00000182132,ENSG00000119280,ENSG00000126878,ENSG00000172893,ENSG00000108551
F1040	Microglia	12106	145	1566	18.7568	35	1.86599	2.16745	0.000157322	ENSG00000187764,ENSG00000057704,ENSG00000187239,ENSG00000109458,ENSG00000118322,ENSG00000066468,ENSG00000197892,ENSG00000107679,ENSG00000189067,ENSG00000070214,ENSG00000010278,ENSG00000138756,ENSG00000140600,ENSG00000172548,ENSG00000133874,ENSG00000196872,ENSG00000151062,ENSG00000114541,ENSG00000116266,ENSG00000180776,ENSG00000136960,ENSG00000135525,ENSG00000120756,ENSG00000075035,ENSG00000137563…
F1040	Oligodendrocyte	12106	145	2211	26.4823	79	2.98312	5.51725	7.19919e-23	ENSG00000082996,ENSG00000102158,ENSG00000166387,ENSG00000187764,ENSG00000116473,ENSG00000057704,ENSG00000135905,ENSG00000169504,ENSG00000164303,ENSG00000187239,ENSG00000109458,ENSG00000118322,ENSG00000139433,ENSG00000066468,ENSG00000114166,ENSG00000103540,ENSG00000197892,ENSG00000158079,ENSG00000115935,ENSG00000107679,ENSG00000189067,ENSG00000070214,ENSG00000120162,ENSG00000049245,ENSG00000010278…
F1040	Neuron	12106	145	5889	70.5357	78	1.10582	1.23207	0.122193	ENSG00000116473,ENSG00000163013,ENSG00000135905,ENSG00000164303,ENSG00000187239,ENSG00000109458,ENSG00000143157,ENSG00000139433,ENSG00000066468,ENSG00000158079,ENSG00000107679,ENSG00000189067,ENSG00000225968,ENSG00000070214,ENSG00000112851,ENSG00000120162,ENSG00000049245,ENSG00000053254,ENSG00000010278,ENSG00000138756,ENSG00000213366,ENSG00000071054,ENSG00000100884,ENSG00000140600,ENSG00000162512…
F1040	Endothelia	12106	145	1694	20.2899	21	1.035	1.04144	0.468578	ENSG00000135905,ENSG00000169504,ENSG00000118322,ENSG00000066468,ENSG00000114166,ENSG00000138756,ENSG00000213366,ENSG00000140600,ENSG00000104267,ENSG00000069849,ENSG00000123636,ENSG00000198912,ENSG00000127920,ENSG00000167191,ENSG00000182132,ENSG00000119280,ENSG00000126878,ENSG00000116918,ENSG00000108551,ENSG00000102934,ENSG00000188677
F1041	Astrocyte	12106	51	1714	7.22072	7	0.969433	0.964424	0.59655	ENSG00000056736,ENSG00000129422,ENSG00000168539,ENSG00000134419,ENSG00000215217,ENSG00000108848,ENSG00000137474
F1041	Microglia	12106	51	1566	6.59722	8	1.21263	1.25346	0.33683	ENSG00000166348,ENSG00000058404,ENSG00000127311,ENSG00000106546,ENSG00000152558,ENSG00000107798,ENSG00000134419,ENSG00000137474
F1041	Oligodendrocyte	12106	51	2211	9.31447	11	1.18096	1.23185	0.322328	ENSG00000164076,ENSG00000166348,ENSG00000058404,ENSG00000143502,ENSG00000163867,ENSG00000054356,ENSG00000106546,ENSG00000117616,ENSG00000175305,ENSG00000155506,ENSG00000107798
F1041	Neuron	12106	51	5889	24.8091	27	1.08831	1.1885	0.317362	ENSG00000164076,ENSG00000172375,ENSG00000185442,ENSG00000175182,ENSG00000177614,ENSG00000236104,ENSG00000166348,ENSG00000058404,ENSG00000184007,ENSG00000163930,ENSG00000143502,ENSG00000054356,ENSG00000176956,ENSG00000152558,ENSG00000117616,ENSG00000129422,ENSG00000169992,ENSG00000130822,ENSG00000155506,ENSG00000197586,ENSG00000107798,ENSG00000266074,ENSG00000111799,ENSG00000215217,ENSG00000104863…
F1041	Endothelia	12106	51	1694	7.13646	9	1.26113	1.31874	0.279334	ENSG00000166348,ENSG00000056736,ENSG00000158747,ENSG00000152558,ENSG00000129422,ENSG00000168539,ENSG00000134419,ENSG00000125170,ENSG00000137474
F1075	Astrocyte	12106	59	1714	8.35338	5	0.59856	0.56013	0.934306	ENSG00000163697,ENSG00000164199,ENSG00000117707,ENSG00000110931,ENSG00000178538
F1075	Microglia	12106	59	1566	7.63208	7	0.917181	0.9056	0.655353	ENSG00000122545,ENSG00000117707,ENSG00000182263,ENSG00000172379,ENSG00000143878,ENSG00000187164,ENSG00000141622
F1075	Oligodendrocyte	12106	59	2211	10.7756	19	1.76325	2.13541	0.00700071	ENSG00000175928,ENSG00000163697,ENSG00000147488,ENSG00000130962,ENSG00000122545,ENSG00000106069,ENSG00000164199,ENSG00000112877,ENSG00000110931,ENSG00000182263,ENSG00000154122,ENSG00000172379,ENSG00000143878,ENSG00000178538,ENSG00000141576,ENSG00000187164,ENSG00000175155,ENSG00000141622,ENSG00000196169
F1075	Neuron	12106	59	5889	28.7007	31	1.08011	1.16968	0.319106	ENSG00000163697,ENSG00000147488,ENSG00000112659,ENSG00000158186,ENSG00000114923,ENSG00000157350,ENSG00000115993,ENSG00000067840,ENSG00000122545,ENSG00000106069,ENSG00000146216,ENSG00000169762,ENSG00000182606,ENSG00000136848,ENSG00000131504,ENSG00000117707,ENSG00000110931,ENSG00000100528,ENSG00000154122,ENSG00000167548,ENSG00000144550,ENSG00000172379,ENSG00000143878,ENSG00000132535,ENSG00000141576…
F1075	Endothelia	12106	59	1694	8.25591	6	0.726752	0.694757	0.851661	ENSG00000163697,ENSG00000122545,ENSG00000164199,ENSG00000117707,ENSG00000037280,ENSG00000143878
F1101	Astrocyte	12106	57	1714	8.07021	12	1.48695	1.62107	0.0997909	ENSG00000152822,ENSG00000171863,ENSG00000170579,ENSG00000108669,ENSG00000169760,ENSG00000166925,ENSG00000169032,ENSG00000163710,ENSG00000164188,ENSG00000154229,ENSG00000100364,ENSG00000171724
F1101	Microglia	12106	57	1566	7.37337	18	2.44122	3.13047	0.000196359	ENSG00000083444,ENSG00000139220,ENSG00000171863,ENSG00000154027,ENSG00000108669,ENSG00000149970,ENSG00000114251,ENSG00000169760,ENSG00000196220,ENSG00000166925,ENSG00000164889,ENSG00000144583,ENSG00000169241,ENSG00000273079,ENSG00000143322,ENSG00000105738,ENSG00000101746,ENSG00000124191
F1101	Oligodendrocyte	12106	57	2211	10.4103	22	2.11329	2.83093	0.000245475	ENSG00000139220,ENSG00000170579,ENSG00000058091,ENSG00000154027,ENSG00000152127,ENSG00000077157,ENSG00000169760,ENSG00000166925,ENSG00000073910,ENSG00000130226,ENSG00000143409,ENSG00000113805,ENSG00000164889,ENSG00000144583,ENSG00000151623,ENSG00000114019,ENSG00000273079,ENSG00000134909,ENSG00000129250,ENSG00000154229,ENSG00000101746,ENSG00000100364
F1101	Neuron	12106	57	5889	27.7278	38	1.37046	2.11847	0.00451328	ENSG00000083444,ENSG00000152822,ENSG00000139220,ENSG00000170579,ENSG00000058091,ENSG00000154027,ENSG00000152127,ENSG00000108669,ENSG00000149970,ENSG00000077157,ENSG00000143013,ENSG00000169760,ENSG00000196220,ENSG00000166925,ENSG00000073910,ENSG00000130226,ENSG00000177272,ENSG00000169032,ENSG00000113805,ENSG00000198793,ENSG00000151623,ENSG00000108231,ENSG00000179796,ENSG00000273079,ENSG00000134909…
F1101	Endothelia	12106	57	1694	7.97604	12	1.50451	1.64351	0.0932634	ENSG00000139220,ENSG00000171863,ENSG00000108669,ENSG00000166925,ENSG00000073910,ENSG00000130226,ENSG00000169032,ENSG00000151623,ENSG00000164188,ENSG00000154229,ENSG00000100364,ENSG00000171724
F1479	Astrocyte	12106	98	1714	13.8751	15	1.08107	1.09659	0.414946	ENSG00000135905,ENSG00000118322,ENSG00000066468,ENSG00000114166,ENSG00000189067,ENSG00000010278,ENSG00000213366,ENSG00000167996,ENSG00000069849,ENSG00000136960,ENSG00000198912,ENSG00000167191,ENSG00000182132,ENSG00000119280,ENSG00000126878
F1479	Microglia	12106	98	1566	12.677	27	2.12984	2.58677	8.33826e-05	ENSG00000187764,ENSG00000057704,ENSG00000187239,ENSG00000109458,ENSG00000118322,ENSG00000066468,ENSG00000197892,ENSG00000107679,ENSG00000189067,ENSG00000070214,ENSG00000010278,ENSG00000140600,ENSG00000172548,ENSG00000196872,ENSG00000151062,ENSG00000116266,ENSG00000180776,ENSG00000136960,ENSG00000135525,ENSG00000120756,ENSG00000075035,ENSG00000171766,ENSG00000176485,ENSG00000167191,ENSG00000182132…
F1479	Oligodendrocyte	12106	98	2211	17.8984	59	3.29638	6.92641	2.54649e-20	ENSG00000082996,ENSG00000102158,ENSG00000166387,ENSG00000187764,ENSG00000116473,ENSG00000057704,ENSG00000135905,ENSG00000169504,ENSG00000164303,ENSG00000187239,ENSG00000109458,ENSG00000118322,ENSG00000139433,ENSG00000066468,ENSG00000114166,ENSG00000103540,ENSG00000197892,ENSG00000158079,ENSG00000115935,ENSG00000107679,ENSG00000189067,ENSG00000070214,ENSG00000120162,ENSG00000049245,ENSG00000010278…
F1479	Neuron	12106	98	5889	47.6724	55	1.15371	1.35357	0.0829137	ENSG00000116473,ENSG00000163013,ENSG00000135905,ENSG00000164303,ENSG00000187239,ENSG00000109458,ENSG00000139433,ENSG00000066468,ENSG00000158079,ENSG00000107679,ENSG00000189067,ENSG00000070214,ENSG00000112851,ENSG00000120162,ENSG00000049245,ENSG00000053254,ENSG00000010278,ENSG00000213366,ENSG00000071054,ENSG00000100884,ENSG00000140600,ENSG00000162512,ENSG00000167996,ENSG00000164300,ENSG00000109846…
F1479	Endothelia	12106	98	1694	13.7132	17	1.23968	1.29289	0.204132	ENSG00000135905,ENSG00000169504,ENSG00000118322,ENSG00000066468,ENSG00000114166,ENSG00000213366,ENSG00000140600,ENSG00000069849,ENSG00000198912,ENSG00000127920,ENSG00000167191,ENSG00000182132,ENSG00000119280,ENSG00000126878,ENSG00000116918,ENSG00000102934,ENSG00000188677
M2	Astrocyte	12106	463	1714	65.5528	81	1.23565	1.29975	0.023307	ENSG00000131951,ENSG00000176601,ENSG00000111834,ENSG00000160838,ENSG00000137098,ENSG00000114473,ENSG00000133640,ENSG00000198774,ENSG00000004838,ENSG00000114670,ENSG00000158163,ENSG00000178125,ENSG00000167858,ENSG00000157856,ENSG00000119703,ENSG00000185860,ENSG00000151575,ENSG00000133067,ENSG00000164675,ENSG00000088727,ENSG00000166578,ENSG00000000003,ENSG00000165115,ENSG00000010626,ENSG00000118965…
M2	Microglia	12106	463	1566	59.8925	28	0.467505	0.422931	1	ENSG00000008226,ENSG00000158163,ENSG00000198589,ENSG00000187240,ENSG00000179299,ENSG00000172349,ENSG00000142609,ENSG00000186952,ENSG00000184500,ENSG00000184898,ENSG00000189431,ENSG00000107186,ENSG00000172613,ENSG00000183578,ENSG00000175764,ENSG00000064012,ENSG00000002587,ENSG00000197442,ENSG00000222009,ENSG00000115350,ENSG00000186283,ENSG00000183098,ENSG00000087903,ENSG00000025708,ENSG00000179029…
M2	Oligodendrocyte	12106	463	2211	84.5608	32	0.378426	0.322487	1	ENSG00000151023,ENSG00000112319,ENSG00000090889,ENSG00000138193,ENSG00000112530,ENSG00000138587,ENSG00000159713,ENSG00000186952,ENSG00000054654,ENSG00000077157,ENSG00000185043,ENSG00000163832,ENSG00000066032,ENSG00000162542,ENSG00000152127,ENSG00000163873,ENSG00000160050,ENSG00000002587,ENSG00000197442,ENSG00000053372,ENSG00000165084,ENSG00000134291,ENSG00000006468,ENSG00000154127,ENSG00000182378…
M2	Neuron	12106	463	5889	225.228	152	0.674872	0.503174	1	ENSG00000096093,ENSG00000104218,ENSG00000188316,ENSG00000164953,ENSG00000039139,ENSG00000112319,ENSG00000163297,ENSG00000106992,ENSG00000115423,ENSG00000163349,ENSG00000135046,ENSG00000182718,ENSG00000187240,ENSG00000121769,ENSG00000112530,ENSG00000215217,ENSG00000058453,ENSG00000181652,ENSG00000110723,ENSG00000172349,ENSG00000135951,ENSG00000147400,ENSG00000130635,ENSG00000185989,ENSG00000107249…
M2	Endothelia	12106	463	1694	64.7879	38	0.58653	0.53925	0.999965	ENSG00000198774,ENSG00000185860,ENSG00000164294,ENSG00000133067,ENSG00000182718,ENSG00000138193,ENSG00000109610,ENSG00000107249,ENSG00000159713,ENSG00000235750,ENSG00000054654,ENSG00000244607,ENSG00000173208,ENSG00000054179,ENSG00000185250,ENSG00000091879,ENSG00000007062,ENSG00000066032,ENSG00000164398,ENSG00000186352,ENSG00000205268,ENSG00000108379,ENSG00000115241,ENSG00000177519,ENSG00000100577…
M4	Astrocyte	12106	716	1714	101.373	107	1.05551	1.06961	0.282831	ENSG00000136960,ENSG00000126803,ENSG00000166086,ENSG00000164161,ENSG00000028116,ENSG00000135905,ENSG00000139737,ENSG00000146122,ENSG00000183230,ENSG00000012171,ENSG00000047365,ENSG00000173786,ENSG00000173327,ENSG00000126878,ENSG00000250722,ENSG00000143995,ENSG00000086205,ENSG00000160781,ENSG00000184005,ENSG00000140479,ENSG00000010278,ENSG00000118322,ENSG00000163697,ENSG00000169554,ENSG00000204482…
M4	Microglia	12106	716	1566	92.6199	156	1.6843	1.97164	8.82621e-12	ENSG00000114541,ENSG00000091513,ENSG00000136960,ENSG00000168297,ENSG00000011426,ENSG00000065809,ENSG00000124920,ENSG00000198121,ENSG00000013297,ENSG00000174607,ENSG00000075651,ENSG00000164124,ENSG00000184144,ENSG00000169247,ENSG00000150867,ENSG00000197892,ENSG00000112893,ENSG00000070214,ENSG00000204655,ENSG00000164161,ENSG00000172508,ENSG00000151726,ENSG00000172005,ENSG00000158859,ENSG00000075539…
M4	Oligodendrocyte	12106	716	2211	130.768	280	2.1412	3.14543	8.54261e-42	ENSG00000196187,ENSG00000114541,ENSG00000168314,ENSG00000065361,ENSG00000091513,ENSG00000136960,ENSG00000143418,ENSG00000205116,ENSG00000170775,ENSG00000123560,ENSG00000168297,ENSG00000126803,ENSG00000136541,ENSG00000011426,ENSG00000065809,ENSG00000147488,ENSG00000124920,ENSG00000198121,ENSG00000013297,ENSG00000183111,ENSG00000166086,ENSG00000174607,ENSG00000075651,ENSG00000139433,ENSG00000164124…
M4	Neuron	12106	716	5889	348.3	330	0.947458	0.896762	0.926433	ENSG00000065361,ENSG00000136960,ENSG00000143418,ENSG00000170775,ENSG00000168297,ENSG00000136541,ENSG00000011426,ENSG00000065809,ENSG00000147488,ENSG00000198121,ENSG00000013297,ENSG00000166086,ENSG00000174607,ENSG00000075651,ENSG00000139433,ENSG00000184144,ENSG00000150867,ENSG00000112893,ENSG00000070214,ENSG00000204655,ENSG00000172508,ENSG00000066322,ENSG00000151726,ENSG00000172005,ENSG00000075539…
M4	Endothelia	12106	716	1694	100.19	123	1.22766	1.29638	0.00769217	ENSG00000205116,ENSG00000123560,ENSG00000136541,ENSG00000065809,ENSG00000166086,ENSG00000174607,ENSG00000169504,ENSG00000112893,ENSG00000164161,ENSG00000151726,ENSG00000028116,ENSG00000135905,ENSG00000139737,ENSG00000146122,ENSG00000183230,ENSG00000197430,ENSG00000012171,ENSG00000047365,ENSG00000173327,ENSG00000126878,ENSG00000250722,ENSG00000152689,ENSG00000179178,ENSG00000086205,ENSG00000160781…
M5	Astrocyte	12106	726	1714	102.789	105	1.02151	1.02679	0.421142	ENSG00000109738,ENSG00000067715,ENSG00000169933,ENSG00000133318,ENSG00000134121,ENSG00000120251,ENSG00000091129,ENSG00000092820,ENSG00000161203,ENSG00000166432,ENSG00000112186,ENSG00000101144,ENSG00000127824,ENSG00000154096,ENSG00000108395,ENSG00000181449,ENSG00000100600,ENSG00000163884,ENSG00000110693,ENSG00000152779,ENSG00000213190,ENSG00000137693,ENSG00000187091,ENSG00000186153,ENSG00000152932…
M5	Microglia	12106	726	1566	93.9134	84	0.894441	0.873873	0.88365	ENSG00000189241,ENSG00000119397,ENSG00000188191,ENSG00000136531,ENSG00000172292,ENSG00000197872,ENSG00000169933,ENSG00000102003,ENSG00000116675,ENSG00000143970,ENSG00000186310,ENSG00000178662,ENSG00000177570,ENSG00000139970,ENSG00000100600,ENSG00000164924,ENSG00000110693,ENSG00000187189,ENSG00000125814,ENSG00000106299,ENSG00000261115,ENSG00000187091,ENSG00000040731,ENSG00000173258,ENSG00000152518…
M5	Oligodendrocyte	12106	726	2211	132.594	148	1.11619	1.15643	0.0712414	ENSG00000189241,ENSG00000119397,ENSG00000188191,ENSG00000136531,ENSG00000172292,ENSG00000169891,ENSG00000067715,ENSG00000197872,ENSG00000169933,ENSG00000133318,ENSG00000134121,ENSG00000040341,ENSG00000102003,ENSG00000116675,ENSG00000120251,ENSG00000091129,ENSG00000114279,ENSG00000050748,ENSG00000112186,ENSG00000159164,ENSG00000186310,ENSG00000130540,ENSG00000178662,ENSG00000154096,ENSG00000113327…
M5	Neuron	12106	726	5889	353.165	415	1.17509	1.43966	1.29393e-06	ENSG00000109738,ENSG00000189241,ENSG00000065559,ENSG00000114573,ENSG00000188191,ENSG00000136531,ENSG00000169139,ENSG00000172292,ENSG00000144834,ENSG00000169891,ENSG00000067715,ENSG00000197872,ENSG00000119778,ENSG00000168769,ENSG00000169933,ENSG00000133318,ENSG00000086300,ENSG00000115419,ENSG00000109436,ENSG00000134121,ENSG00000040341,ENSG00000085433,ENSG00000102003,ENSG00000131507,ENSG00000116675…
M5	Endothelia	12106	726	1694	101.59	120	1.18122	1.23364	0.0258741	ENSG00000109738,ENSG00000067715,ENSG00000133318,ENSG00000134121,ENSG00000131507,ENSG00000120251,ENSG00000091129,ENSG00000092820,ENSG00000166432,ENSG00000101144,ENSG00000158560,ENSG00000131437,ENSG00000127824,ENSG00000130540,ENSG00000177570,ENSG00000108395,ENSG00000181449,ENSG00000100813,ENSG00000104375,ENSG00000163884,ENSG00000110693,ENSG00000065526,ENSG00000261115,ENSG00000137693,ENSG00000187091…
M6	Astrocyte	12106	328	1714	46.4391	47	1.01208	1.0145	0.488845	ENSG00000171617,ENSG00000117114,ENSG00000108797,ENSG00000109339,ENSG00000156113,ENSG00000144468,ENSG00000240184,ENSG00000115145,ENSG00000143761,ENSG00000185352,ENSG00000124140,ENSG00000106003,ENSG00000135472,ENSG00000057252,ENSG00000144285,ENSG00000176749,ENSG00000166448,ENSG00000106278,ENSG00000188338,ENSG00000129562,ENSG00000198918,ENSG00000147604,ENSG00000152578,ENSG00000161970,ENSG00000155903…
M6	Microglia	12106	328	1566	42.4292	59	1.39055	1.49479	0.00496542	ENSG00000171132,ENSG00000133019,ENSG00000171617,ENSG00000164588,ENSG00000102226,ENSG00000117114,ENSG00000115977,ENSG00000166006,ENSG00000136854,ENSG00000174145,ENSG00000197969,ENSG00000198794,ENSG00000186472,ENSG00000156113,ENSG00000174938,ENSG00000240184,ENSG00000185352,ENSG00000121871,ENSG00000158006,ENSG00000169372,ENSG00000057252,ENSG00000169271,ENSG00000176749,ENSG00000165209,ENSG00000198918…
M6	Oligodendrocyte	12106	328	2211	59.9048	73	1.2186	1.29075	0.0363589	ENSG00000171132,ENSG00000164588,ENSG00000102226,ENSG00000157064,ENSG00000166006,ENSG00000114439,ENSG00000047410,ENSG00000075340,ENSG00000144406,ENSG00000198794,ENSG00000109339,ENSG00000186472,ENSG00000156113,ENSG00000118971,ENSG00000174938,ENSG00000165185,ENSG00000011083,ENSG00000185352,ENSG00000073910,ENSG00000153140,ENSG00000124140,ENSG00000116497,ENSG00000186868,ENSG00000167654,ENSG00000144285…
M6	Neuron	12106	328	5889	159.557	184	1.1532	1.36016	0.00365159	ENSG00000171132,ENSG00000106976,ENSG00000116106,ENSG00000133019,ENSG00000171617,ENSG00000164588,ENSG00000102226,ENSG00000117114,ENSG00000157064,ENSG00000115977,ENSG00000166006,ENSG00000136854,ENSG00000172209,ENSG00000174145,ENSG00000075340,ENSG00000197969,ENSG00000153558,ENSG00000204851,ENSG00000108797,ENSG00000067842,ENSG00000144406,ENSG00000198794,ENSG00000109339,ENSG00000186472,ENSG00000198910…
M6	Endothelia	12106	328	1694	45.8972	44	0.958663	0.950981	0.644688	ENSG00000171132,ENSG00000106976,ENSG00000133019,ENSG00000171617,ENSG00000117114,ENSG00000108797,ENSG00000109339,ENSG00000165185,ENSG00000115145,ENSG00000185352,ENSG00000073910,ENSG00000124140,ENSG00000170759,ENSG00000151929,ENSG00000106003,ENSG00000135472,ENSG00000057252,ENSG00000144285,ENSG00000176749,ENSG00000166448,ENSG00000106278,ENSG00000188338,ENSG00000165209,ENSG00000198918,ENSG00000152578…
M7	Astrocyte	12106	432	1714	61.1637	67	1.09542	1.11756	0.224583	ENSG00000181722,ENSG00000106537,ENSG00000003402,ENSG00000135298,ENSG00000083896,ENSG00000145675,ENSG00000123352,ENSG00000109756,ENSG00000162909,ENSG00000107779,ENSG00000117632,ENSG00000173706,ENSG00000066027,ENSG00000115380,ENSG00000078549,ENSG00000169860,ENSG00000185305,ENSG00000164904,ENSG00000121039,ENSG00000136297,ENSG00000146223,ENSG00000143171,ENSG00000145779,ENSG00000116729,ENSG00000175287…
M7	Microglia	12106	432	1566	55.8824	70	1.25263	1.31555	0.0259411	ENSG00000163032,ENSG00000196950,ENSG00000185900,ENSG00000172260,ENSG00000144290,ENSG00000164830,ENSG00000022355,ENSG00000218336,ENSG00000184613,ENSG00000175567,ENSG00000144619,ENSG00000184611,ENSG00000197535,ENSG00000064393,ENSG00000067141,ENSG00000203879,ENSG00000196865,ENSG00000110047,ENSG00000180440,ENSG00000173320,ENSG00000198626,ENSG00000118473,ENSG00000185305,ENSG00000102468,ENSG00000175497…
M7	Oligodendrocyte	12106	432	2211	78.8991	101	1.28012	1.38305	0.00381738	ENSG00000163032,ENSG00000145087,ENSG00000172260,ENSG00000163536,ENSG00000144290,ENSG00000163947,ENSG00000164830,ENSG00000022355,ENSG00000218336,ENSG00000028528,ENSG00000181722,ENSG00000139174,ENSG00000104490,ENSG00000164619,ENSG00000112118,ENSG00000079308,ENSG00000135298,ENSG00000144619,ENSG00000145675,ENSG00000074590,ENSG00000132639,ENSG00000184611,ENSG00000112290,ENSG00000197535,ENSG00000064393…
M7	Neuron	12106	432	5889	210.148	238	1.13254	1.30753	0.00366298	ENSG00000163032,ENSG00000196950,ENSG00000143164,ENSG00000145087,ENSG00000172260,ENSG00000163536,ENSG00000144290,ENSG00000107758,ENSG00000008086,ENSG00000164830,ENSG00000022355,ENSG00000218336,ENSG00000184613,ENSG00000179542,ENSG00000181722,ENSG00000106537,ENSG00000139174,ENSG00000175567,ENSG00000104490,ENSG00000164619,ENSG00000123091,ENSG00000112118,ENSG00000003402,ENSG00000107295,ENSG00000135298…
M7	Endothelia	12106	432	1694	60.45	69	1.14144	1.17543	0.128615	ENSG00000196950,ENSG00000107758,ENSG00000181722,ENSG00000175567,ENSG00000003402,ENSG00000079308,ENSG00000135298,ENSG00000145675,ENSG00000123352,ENSG00000109756,ENSG00000064393,ENSG00000163492,ENSG00000173706,ENSG00000132688,ENSG00000182372,ENSG00000066027,ENSG00000115380,ENSG00000078549,ENSG00000197712,ENSG00000185305,ENSG00000164904,ENSG00000136297,ENSG00000146223,ENSG00000143171,ENSG00000145779…
M11	Astrocyte	12106	490	1714	69.3755	58	0.83603	0.807515	0.944606	ENSG00000164050,ENSG00000186487,ENSG00000129422,ENSG00000166508,ENSG00000164627,ENSG00000172915,ENSG00000172037,ENSG00000079337,ENSG00000166046,ENSG00000106261,ENSG00000132692,ENSG00000089199,ENSG00000186642,ENSG00000118785,ENSG00000145632,ENSG00000164111,ENSG00000178814,ENSG00000130304,ENSG00000172638,ENSG00000184588,ENSG00000213719,ENSG00000137154,ENSG00000152822,ENSG00000161016,ENSG00000157227…
M11	Microglia	12106	490	1566	63.3851	74	1.16747	1.207	0.0842706	ENSG00000164050,ENSG00000187239,ENSG00000157483,ENSG00000186487,ENSG00000164627,ENSG00000176485,ENSG00000117266,ENSG00000135525,ENSG00000196814,ENSG00000172915,ENSG00000107331,ENSG00000165959,ENSG00000143772,ENSG00000115183,ENSG00000019144,ENSG00000104419,ENSG00000187764,ENSG00000087245,ENSG00000048740,ENSG00000152558,ENSG00000010704,ENSG00000160584,ENSG00000186231,ENSG00000166342,ENSG00000125844…
M11	Oligodendrocyte	12106	490	2211	89.492	128	1.4303	1.61816	6.8888e-06	ENSG00000114993,ENSG00000115468,ENSG00000136451,ENSG00000023171,ENSG00000187239,ENSG00000157483,ENSG00000165175,ENSG00000137221,ENSG00000168214,ENSG00000198753,ENSG00000186487,ENSG00000130958,ENSG00000166508,ENSG00000143409,ENSG00000176485,ENSG00000133056,ENSG00000117266,ENSG00000135525,ENSG00000021300,ENSG00000141524,ENSG00000196814,ENSG00000172915,ENSG00000107331,ENSG00000139292,ENSG00000204381…
M11	Neuron	12106	490	5889	238.362	215	0.90199	0.818761	0.986258	ENSG00000107338,ENSG00000114993,ENSG00000114353,ENSG00000023171,ENSG00000187239,ENSG00000157483,ENSG00000165175,ENSG00000137221,ENSG00000198753,ENSG00000186487,ENSG00000129422,ENSG00000109381,ENSG00000133056,ENSG00000135525,ENSG00000178764,ENSG00000021300,ENSG00000196814,ENSG00000172915,ENSG00000107331,ENSG00000180891,ENSG00000172037,ENSG00000060762,ENSG00000165959,ENSG00000197724,ENSG00000079337…
M11	Endothelia	12106	490	1694	68.566	65	0.947992	0.937634	0.701948	ENSG00000114353,ENSG00000164050,ENSG00000157483,ENSG00000129422,ENSG00000117266,ENSG00000021300,ENSG00000107331,ENSG00000204381,ENSG00000172037,ENSG00000106261,ENSG00000148400,ENSG00000132692,ENSG00000152558,ENSG00000089199,ENSG00000162946,ENSG00000176381,ENSG00000125844,ENSG00000186642,ENSG00000198087,ENSG00000122008,ENSG00000065534,ENSG00000097007,ENSG00000164111,ENSG00000107719,ENSG00000178814…
M13	Astrocyte	12106	668	1714	94.5772	88	0.930456	0.915604	0.789265	ENSG00000110427,ENSG00000151090,ENSG00000170579,ENSG00000109670,ENSG00000084731,ENSG00000004468,ENSG00000078902,ENSG00000176204,ENSG00000127603,ENSG00000136535,ENSG00000177694,ENSG00000135063,ENSG00000016391,ENSG00000213366,ENSG00000155189,ENSG00000091986,ENSG00000172602,ENSG00000143420,ENSG00000147872,ENSG00000134824,ENSG00000102172,ENSG00000110841,ENSG00000147027,ENSG00000152377,ENSG00000119866…
M13	Microglia	12106	668	1566	86.4107	88	1.01839	1.02244	0.443539	ENSG00000183775,ENSG00000183454,ENSG00000151090,ENSG00000081189,ENSG00000176788,ENSG00000136928,ENSG00000171246,ENSG00000169744,ENSG00000197147,ENSG00000198797,ENSG00000130558,ENSG00000197106,ENSG00000179456,ENSG00000078902,ENSG00000187672,ENSG00000171603,ENSG00000176204,ENSG00000147251,ENSG00000198673,ENSG00000206579,ENSG00000183662,ENSG00000121440,ENSG00000165240,ENSG00000241973,ENSG00000114554…
M13	Oligodendrocyte	12106	668	2211	122.001	132	1.08196	1.10864	0.16376	ENSG00000074317,ENSG00000183775,ENSG00000183454,ENSG00000151090,ENSG00000081189,ENSG00000160145,ENSG00000002746,ENSG00000117152,ENSG00000170579,ENSG00000136928,ENSG00000197147,ENSG00000198797,ENSG00000113100,ENSG00000106089,ENSG00000114423,ENSG00000162989,ENSG00000197106,ENSG00000084754,ENSG00000164742,ENSG00000113319,ENSG00000187672,ENSG00000119042,ENSG00000176204,ENSG00000166257,ENSG00000136535…
M13	Neuron	12106	668	5889	324.951	358	1.10171	1.23332	0.00477061	ENSG00000074317,ENSG00000183775,ENSG00000110427,ENSG00000158445,ENSG00000183454,ENSG00000151090,ENSG00000081189,ENSG00000160145,ENSG00000002746,ENSG00000165985,ENSG00000117152,ENSG00000162817,ENSG00000143013,ENSG00000176788,ENSG00000170579,ENSG00000124785,ENSG00000109670,ENSG00000136928,ENSG00000117016,ENSG00000171246,ENSG00000169744,ENSG00000197147,ENSG00000185274,ENSG00000198797,ENSG00000113100…
M13	Endothelia	12106	668	1694	93.4736	105	1.12331	1.15593	0.104115	ENSG00000110427,ENSG00000151090,ENSG00000160145,ENSG00000162817,ENSG00000109670,ENSG00000106089,ENSG00000084731,ENSG00000004468,ENSG00000176204,ENSG00000127603,ENSG00000136535,ENSG00000206579,ENSG00000177694,ENSG00000135063,ENSG00000016391,ENSG00000144331,ENSG00000213366,ENSG00000091986,ENSG00000134824,ENSG00000110841,ENSG00000147027,ENSG00000173930,ENSG00000152377,ENSG00000119866,ENSG00000135862…
M14	Astrocyte	12106	548	1714	77.5873	87	1.12132	1.15188	0.132474	ENSG00000135750,ENSG00000136261,ENSG00000118733,ENSG00000135540,ENSG00000114790,ENSG00000144730,ENSG00000130055,ENSG00000196935,ENSG00000104343,ENSG00000041982,ENSG00000172817,ENSG00000165029,ENSG00000145476,ENSG00000146648,ENSG00000123104,ENSG00000213064,ENSG00000117069,ENSG00000123595,ENSG00000154310,ENSG00000104447,ENSG00000074047,ENSG00000120333,ENSG00000010810,ENSG00000165323,ENSG00000144802…
M14	Microglia	12106	548	1566	70.8878	82	1.15676	1.19449	0.0852833	ENSG00000128656,ENSG00000175874,ENSG00000154027,ENSG00000145864,ENSG00000185760,ENSG00000134318,ENSG00000147655,ENSG00000117155,ENSG00000138814,ENSG00000185742,ENSG00000149970,ENSG00000107518,ENSG00000114790,ENSG00000154162,ENSG00000182732,ENSG00000070961,ENSG00000165029,ENSG00000146648,ENSG00000123104,ENSG00000213064,ENSG00000177301,ENSG00000078328,ENSG00000115355,ENSG00000068305,ENSG00000144445…
M14	Oligodendrocyte	12106	548	2211	100.085	115	1.14902	1.19893	0.053215	ENSG00000157680,ENSG00000154027,ENSG00000154380,ENSG00000145864,ENSG00000185760,ENSG00000134318,ENSG00000147655,ENSG00000138814,ENSG00000163399,ENSG00000107518,ENSG00000146469,ENSG00000106123,ENSG00000130055,ENSG00000154162,ENSG00000138311,ENSG00000196935,ENSG00000066248,ENSG00000182732,ENSG00000122644,ENSG00000143473,ENSG00000041982,ENSG00000070961,ENSG00000165029,ENSG00000149289,ENSG00000165061…
M14	Neuron	12106	548	5889	266.576	293	1.09912	1.22415	0.0116841	ENSG00000157680,ENSG00000128656,ENSG00000056972,ENSG00000175874,ENSG00000154027,ENSG00000149269,ENSG00000154380,ENSG00000145864,ENSG00000185760,ENSG00000135750,ENSG00000134318,ENSG00000117155,ENSG00000138814,ENSG00000185742,ENSG00000068724,ENSG00000136261,ENSG00000118733,ENSG00000149970,ENSG00000152402,ENSG00000163399,ENSG00000135540,ENSG00000147676,ENSG00000107518,ENSG00000091656,ENSG00000114790…
M14	Endothelia	12106	548	1694	76.682	95	1.23888	1.30612	0.0140608	ENSG00000135750,ENSG00000118733,ENSG00000135540,ENSG00000107518,ENSG00000114790,ENSG00000144730,ENSG00000130055,ENSG00000196935,ENSG00000122644,ENSG00000104343,ENSG00000164219,ENSG00000041982,ENSG00000172817,ENSG00000152977,ENSG00000165029,ENSG00000151689,ENSG00000072657,ENSG00000145476,ENSG00000164692,ENSG00000146648,ENSG00000116962,ENSG00000123104,ENSG00000213064,ENSG00000117069,ENSG00000154310…
M15	Astrocyte	12106	609	1714	86.2239	65	0.753852	0.713598	0.996261	ENSG00000213585,ENSG00000102144,ENSG00000109180,ENSG00000140740,ENSG00000134369,ENSG00000165678,ENSG00000164190,ENSG00000175582,ENSG00000103769,ENSG00000146731,ENSG00000113387,ENSG00000120053,ENSG00000023734,ENSG00000031698,ENSG00000143106,ENSG00000133872,ENSG00000109971,ENSG00000089693,ENSG00000076351,ENSG00000170370,ENSG00000196230,ENSG00000127418,ENSG00000116977,ENSG00000136802,ENSG00000086062…
M15	Microglia	12106	609	1566	78.7786	55	0.698159	0.656137	0.999151	ENSG00000173726,ENSG00000198961,ENSG00000102144,ENSG00000186462,ENSG00000162378,ENSG00000115310,ENSG00000257923,ENSG00000182220,ENSG00000174684,ENSG00000186001,ENSG00000111647,ENSG00000113387,ENSG00000163539,ENSG00000109971,ENSG00000136521,ENSG00000156398,ENSG00000103653,ENSG00000086062,ENSG00000140044,ENSG00000134222,ENSG00000143382,ENSG00000197959,ENSG00000164066,ENSG00000158615,ENSG00000102466…
M15	Oligodendrocyte	12106	609	2211	111.226	76	0.683295	0.625286	0.99997	ENSG00000138757,ENSG00000147416,ENSG00000198961,ENSG00000102144,ENSG00000117713,ENSG00000104388,ENSG00000162378,ENSG00000130830,ENSG00000134369,ENSG00000115310,ENSG00000023228,ENSG00000075415,ENSG00000100934,ENSG00000141367,ENSG00000101856,ENSG00000163539,ENSG00000155657,ENSG00000003987,ENSG00000167106,ENSG00000114346,ENSG00000166848,ENSG00000163728,ENSG00000170370,ENSG00000196230,ENSG00000180447…
M15	Neuron	12106	609	5889	296.25	337	1.13755	1.32663	0.000405051	ENSG00000113595,ENSG00000014641,ENSG00000138757,ENSG00000164031,ENSG00000138430,ENSG00000173726,ENSG00000198836,ENSG00000147416,ENSG00000171033,ENSG00000198961,ENSG00000128654,ENSG00000102144,ENSG00000115840,ENSG00000117713,ENSG00000139112,ENSG00000104388,ENSG00000143155,ENSG00000138663,ENSG00000136143,ENSG00000115540,ENSG00000186462,ENSG00000109180,ENSG00000162378,ENSG00000018189,ENSG00000135002…
M15	Endothelia	12106	609	1694	85.2177	58	0.680609	0.634498	0.999746	ENSG00000109180,ENSG00000142875,ENSG00000134369,ENSG00000165678,ENSG00000138069,ENSG00000164190,ENSG00000023330,ENSG00000163539,ENSG00000120053,ENSG00000031698,ENSG00000129625,ENSG00000133872,ENSG00000109971,ENSG00000170370,ENSG00000116977,ENSG00000086062,ENSG00000183323,ENSG00000089737,ENSG00000134313,ENSG00000153310,ENSG00000162804,ENSG00000144597,ENSG00000117410,ENSG00000161509,ENSG00000086061…
M16	Astrocyte	12106	1076	1714	152.343	167	1.09621	1.1262	0.098314	ENSG00000104324,ENSG00000176771,ENSG00000071967,ENSG00000162944,ENSG00000184384,ENSG00000113658,ENSG00000119280,ENSG00000039560,ENSG00000196517,ENSG00000084093,ENSG00000159176,ENSG00000112531,ENSG00000082781,ENSG00000165478,ENSG00000130787,ENSG00000123636,ENSG00000186635,ENSG00000175130,ENSG00000114166,ENSG00000196743,ENSG00000124067,ENSG00000065978,ENSG00000260230,ENSG00000066468,ENSG00000104067…
M16	Microglia	12106	1076	1566	139.189	174	1.2501	1.33561	0.000732414	ENSG00000104324,ENSG00000157827,ENSG00000148180,ENSG00000162944,ENSG00000184384,ENSG00000147065,ENSG00000264522,ENSG00000185774,ENSG00000196517,ENSG00000137076,ENSG00000150760,ENSG00000138449,ENSG00000082781,ENSG00000166348,ENSG00000070018,ENSG00000158195,ENSG00000001629,ENSG00000127946,ENSG00000182158,ENSG00000185278,ENSG00000058404,ENSG00000260230,ENSG00000066468,ENSG00000104067,ENSG00000151914…
M16	Oligodendrocyte	12106	1076	2211	196.517	223	1.13476	1.18906	0.0168557	ENSG00000171316,ENSG00000117115,ENSG00000157827,ENSG00000148180,ENSG00000159658,ENSG00000176771,ENSG00000184384,ENSG00000115935,ENSG00000135929,ENSG00000264522,ENSG00000185774,ENSG00000119280,ENSG00000092421,ENSG00000159176,ENSG00000112531,ENSG00000173905,ENSG00000102158,ENSG00000137177,ENSG00000130787,ENSG00000166348,ENSG00000123636,ENSG00000070018,ENSG00000001629,ENSG00000127946,ENSG00000182158…
M16	Neuron	12106	1076	5889	523.423	468	0.894114	0.796448	0.999828	ENSG00000171316,ENSG00000157827,ENSG00000040933,ENSG00000176771,ENSG00000162944,ENSG00000184384,ENSG00000147065,ENSG00000185774,ENSG00000039560,ENSG00000137076,ENSG00000159176,ENSG00000112531,ENSG00000113578,ENSG00000185591,ENSG00000138449,ENSG00000112851,ENSG00000165478,ENSG00000178234,ENSG00000137177,ENSG00000130787,ENSG00000166348,ENSG00000123636,ENSG00000070018,ENSG00000186635,ENSG00000001629…
M16	Endothelia	12106	1076	1694	150.565	187	1.24199	1.3292	0.000625496	ENSG00000171316,ENSG00000104324,ENSG00000148180,ENSG00000176771,ENSG00000071967,ENSG00000162944,ENSG00000184384,ENSG00000119280,ENSG00000039560,ENSG00000196517,ENSG00000159176,ENSG00000112531,ENSG00000150760,ENSG00000138449,ENSG00000082781,ENSG00000173905,ENSG00000165478,ENSG00000130787,ENSG00000166348,ENSG00000123636,ENSG00000158195,ENSG00000001629,ENSG00000114166,ENSG00000197965,ENSG00000196743…
M17	Astrocyte	12106	346	1714	48.9876	26	0.530746	0.48483	0.999963	ENSG00000110931,ENSG00000112769,ENSG00000122884,ENSG00000157985,ENSG00000111249,ENSG00000164687,ENSG00000106689,ENSG00000109906,ENSG00000144868,ENSG00000196505,ENSG00000163827,ENSG00000101938,ENSG00000166886,ENSG00000080824,ENSG00000064989,ENSG00000163520,ENSG00000138764,ENSG00000114646,ENSG00000166441,ENSG00000116661,ENSG00000141480,ENSG00000134419,ENSG00000102595,ENSG00000149403,ENSG00000184009…
M17	Microglia	12106	346	1566	44.7576	40	0.893702	0.876688	0.802222	ENSG00000183049,ENSG00000136636,ENSG00000154146,ENSG00000170017,ENSG00000048991,ENSG00000120594,ENSG00000188906,ENSG00000116254,ENSG00000144381,ENSG00000157985,ENSG00000105880,ENSG00000213047,ENSG00000109906,ENSG00000165119,ENSG00000149527,ENSG00000215788,ENSG00000144868,ENSG00000180287,ENSG00000150337,ENSG00000198208,ENSG00000111344,ENSG00000003096,ENSG00000197555,ENSG00000196358,ENSG00000080824…
M17	Oligodendrocyte	12106	346	2211	63.1923	53	0.83871	0.804872	0.936935	ENSG00000069424,ENSG00000150995,ENSG00000134909,ENSG00000070808,ENSG00000162545,ENSG00000138411,ENSG00000170017,ENSG00000110931,ENSG00000048991,ENSG00000138760,ENSG00000079841,ENSG00000120594,ENSG00000188906,ENSG00000074416,ENSG00000182010,ENSG00000152784,ENSG00000157985,ENSG00000111249,ENSG00000163995,ENSG00000106689,ENSG00000144218,ENSG00000149218,ENSG00000144868,ENSG00000112902,ENSG00000196821…
M17	Neuron	12106	346	5889	168.313	194	1.15262	1.3592	0.00298189	ENSG00000149091,ENSG00000115194,ENSG00000164794,ENSG00000069424,ENSG00000150995,ENSG00000183049,ENSG00000136636,ENSG00000107130,ENSG00000134909,ENSG00000135519,ENSG00000070808,ENSG00000171992,ENSG00000143067,ENSG00000181418,ENSG00000162545,ENSG00000138411,ENSG00000116544,ENSG00000154146,ENSG00000170017,ENSG00000110931,ENSG00000137843,ENSG00000067840,ENSG00000146842,ENSG00000048991,ENSG00000133612…
M17	Endothelia	12106	346	1694	48.416	26	0.537013	0.491617	0.999948	ENSG00000112769,ENSG00000079841,ENSG00000122884,ENSG00000116254,ENSG00000111249,ENSG00000102359,ENSG00000106689,ENSG00000109906,ENSG00000144868,ENSG00000196505,ENSG00000101938,ENSG00000166886,ENSG00000197555,ENSG00000064989,ENSG00000163520,ENSG00000138764,ENSG00000114646,ENSG00000116661,ENSG00000102755,ENSG00000133030,ENSG00000141480,ENSG00000134419,ENSG00000102595,ENSG00000149403,ENSG00000184009…
M18	Astrocyte	12106	287	1714	40.6342	50	1.23049	1.28747	0.067226	ENSG00000166263,ENSG00000132122,ENSG00000069702,ENSG00000117600,ENSG00000116117,ENSG00000065609,ENSG00000147475,ENSG00000165434,ENSG00000130413,ENSG00000185008,ENSG00000168959,ENSG00000141736,ENSG00000137267,ENSG00000095637,ENSG00000133065,ENSG00000198732,ENSG00000135097,ENSG00000119950,ENSG00000120915,ENSG00000172020,ENSG00000154553,ENSG00000083857,ENSG00000064042,ENSG00000132321,ENSG00000163545…
M18	Microglia	12106	287	1566	37.1256	45	1.2121	1.25895	0.0968658	ENSG00000164506,ENSG00000125675,ENSG00000130413,ENSG00000185008,ENSG00000168959,ENSG00000111817,ENSG00000177426,ENSG00000184156,ENSG00000148541,ENSG00000131711,ENSG00000101096,ENSG00000172020,ENSG00000171714,ENSG00000181467,ENSG00000110324,ENSG00000064042,ENSG00000090530,ENSG00000081237,ENSG00000197457,ENSG00000174799,ENSG00000125089,ENSG00000092054,ENSG00000163545,ENSG00000185070,ENSG00000110057…
M18	Oligodendrocyte	12106	287	2211	52.4167	74	1.41176	1.57396	0.000861652	ENSG00000164506,ENSG00000162374,ENSG00000154917,ENSG00000132122,ENSG00000179915,ENSG00000132780,ENSG00000065609,ENSG00000125675,ENSG00000186479,ENSG00000165434,ENSG00000185008,ENSG00000168959,ENSG00000177426,ENSG00000184156,ENSG00000148541,ENSG00000131711,ENSG00000137267,ENSG00000101096,ENSG00000095637,ENSG00000169851,ENSG00000163939,ENSG00000198732,ENSG00000139350,ENSG00000082701,ENSG00000172020…
M18	Neuron	12106	287	5889	139.612	142	1.0171	1.0347	0.410565	ENSG00000164506,ENSG00000162374,ENSG00000154917,ENSG00000119865,ENSG00000179915,ENSG00000146267,ENSG00000055163,ENSG00000117600,ENSG00000170027,ENSG00000155858,ENSG00000116117,ENSG00000160716,ENSG00000178171,ENSG00000065609,ENSG00000125675,ENSG00000154175,ENSG00000186479,ENSG00000162409,ENSG00000165434,ENSG00000130413,ENSG00000185008,ENSG00000168959,ENSG00000147642,ENSG00000131089,ENSG00000181852…
M18	Endothelia	12106	287	1694	40.1601	41	1.02091	1.02501	0.468842	ENSG00000132122,ENSG00000117600,ENSG00000116117,ENSG00000132780,ENSG00000146426,ENSG00000147475,ENSG00000165434,ENSG00000185008,ENSG00000168959,ENSG00000184156,ENSG00000131711,ENSG00000095637,ENSG00000169851,ENSG00000133065,ENSG00000135097,ENSG00000119950,ENSG00000120915,ENSG00000083857,ENSG00000050327,ENSG00000114999,ENSG00000081237,ENSG00000170776,ENSG00000128487,ENSG00000163545,ENSG00000151834…
M20	Astrocyte	12106	71	1714	10.0524	10	0.99479	0.993901	0.559078	ENSG00000168539,ENSG00000084234,ENSG00000134910,ENSG00000215301,ENSG00000177453,ENSG00000169714,ENSG00000126368,ENSG00000198242,ENSG00000111716,ENSG00000074266
M20	Microglia	12106	71	1566	9.18437	8	0.871045	0.853956	0.715037	ENSG00000157087,ENSG00000196872,ENSG00000198879,ENSG00000065413,ENSG00000198242,ENSG00000162927,ENSG00000101349,ENSG00000136048
M20	Oligodendrocyte	12106	71	2211	12.9672	8	0.616941	0.566758	0.960959	ENSG00000151952,ENSG00000071553,ENSG00000065413,ENSG00000044524,ENSG00000185946,ENSG00000111716,ENSG00000146918,ENSG00000123219
M20	Neuron	12106	71	5889	34.5382	30	0.868604	0.771314	0.885099	ENSG00000152818,ENSG00000150540,ENSG00000156486,ENSG00000165757,ENSG00000164715,ENSG00000151952,ENSG00000071553,ENSG00000157087,ENSG00000196872,ENSG00000143847,ENSG00000065413,ENSG00000044524,ENSG00000138675,ENSG00000112081,ENSG00000084234,ENSG00000144401,ENSG00000173264,ENSG00000129003,ENSG00000070814,ENSG00000134910,ENSG00000176022,ENSG00000172731,ENSG00000126067,ENSG00000112282,ENSG00000111716…
M20	Endothelia	12106	71	1694	9.93507	12	1.20784	1.25187	0.285813	ENSG00000152818,ENSG00000165757,ENSG00000151952,ENSG00000168539,ENSG00000065413,ENSG00000084234,ENSG00000134910,ENSG00000215301,ENSG00000177453,ENSG00000169714,ENSG00000111716,ENSG00000074266
M21	Astrocyte	12106	182	1714	25.768	22	0.853771	0.831513	0.818793	ENSG00000154277,ENSG00000134333,ENSG00000111897,ENSG00000173402,ENSG00000138107,ENSG00000113645,ENSG00000069849,ENSG00000134115,ENSG00000067057,ENSG00000091664,ENSG00000117868,ENSG00000108671,ENSG00000100902,ENSG00000143776,ENSG00000067064,ENSG00000175334,ENSG00000176102,ENSG00000100316,ENSG00000148660,ENSG00000108953,ENSG00000180263,ENSG00000101745
M21	Microglia	12106	182	1566	23.543	8	0.339803	0.305923	0.999975	ENSG00000143153,ENSG00000072135,ENSG00000113645,ENSG00000163568,ENSG00000012174,ENSG00000011295,ENSG00000008988,ENSG00000120658
M21	Oligodendrocyte	12106	182	2211	33.2399	24	0.722024	0.676309	0.973985	ENSG00000138078,ENSG00000154277,ENSG00000143153,ENSG00000111897,ENSG00000145860,ENSG00000072135,ENSG00000112972,ENSG00000073969,ENSG00000069849,ENSG00000114120,ENSG00000138246,ENSG00000052802,ENSG00000091664,ENSG00000198730,ENSG00000145386,ENSG00000067064,ENSG00000120658,ENSG00000067225,ENSG00000130816,ENSG00000100316,ENSG00000167699,ENSG00000188677,ENSG00000187741,ENSG00000101745
M21	Neuron	12106	182	5889	88.5344	82	0.926193	0.863786	0.853436	ENSG00000138078,ENSG00000154277,ENSG00000143153,ENSG00000168056,ENSG00000205189,ENSG00000134333,ENSG00000144357,ENSG00000122965,ENSG00000111897,ENSG00000139726,ENSG00000145860,ENSG00000197043,ENSG00000066557,ENSG00000125386,ENSG00000173402,ENSG00000146830,ENSG00000115947,ENSG00000072135,ENSG00000138107,ENSG00000198380,ENSG00000182979,ENSG00000112972,ENSG00000163964,ENSG00000073969,ENSG00000113645…
M21	Endothelia	12106	182	1694	25.4674	16	0.628255	0.588561	0.988065	ENSG00000111897,ENSG00000173402,ENSG00000116750,ENSG00000069849,ENSG00000134115,ENSG00000067057,ENSG00000132405,ENSG00000091664,ENSG00000117868,ENSG00000008988,ENSG00000176102,ENSG00000148660,ENSG00000188677,ENSG00000108953,ENSG00000108107,ENSG00000180263
M22	Astrocyte	12106	342	1714	48.4213	127	2.62281	3.78758	5.60164e-27	ENSG00000126016,ENSG00000164292,ENSG00000113594,ENSG00000162407,ENSG00000138685,ENSG00000138696,ENSG00000116641,ENSG00000163110,ENSG00000168710,ENSG00000114698,ENSG00000111961,ENSG00000119471,ENSG00000117519,ENSG00000172380,ENSG00000151322,ENSG00000132669,ENSG00000143514,ENSG00000135838,ENSG00000102935,ENSG00000129116,ENSG00000080493,ENSG00000091409,ENSG00000177807,ENSG00000162599,ENSG00000170989…
M22	Microglia	12106	342	1566	44.2402	41	0.926759	0.914532	0.725492	ENSG00000084070,ENSG00000162407,ENSG00000163110,ENSG00000138756,ENSG00000111961,ENSG00000151322,ENSG00000132669,ENSG00000143514,ENSG00000135838,ENSG00000103187,ENSG00000169006,ENSG00000136869,ENSG00000111783,ENSG00000262655,ENSG00000162415,ENSG00000163406,ENSG00000046653,ENSG00000119408,ENSG00000121988,ENSG00000205336,ENSG00000241399,ENSG00000198919,ENSG00000170458,ENSG00000205730,ENSG00000114988…
M22	Oligodendrocyte	12106	342	2211	62.4618	56	0.896549	0.873088	0.838504	ENSG00000163110,ENSG00000168710,ENSG00000138756,ENSG00000111961,ENSG00000172380,ENSG00000105855,ENSG00000151322,ENSG00000132669,ENSG00000169439,ENSG00000135838,ENSG00000116132,ENSG00000177807,ENSG00000162599,ENSG00000163346,ENSG00000123094,ENSG00000127483,ENSG00000136205,ENSG00000100852,ENSG00000134769,ENSG00000168461,ENSG00000046653,ENSG00000100427,ENSG00000136044,ENSG00000129353,ENSG00000117525…
M22	Neuron	12106	342	5889	166.367	160	0.96173	0.926111	0.774382	ENSG00000113594,ENSG00000084070,ENSG00000162407,ENSG00000138696,ENSG00000116641,ENSG00000163110,ENSG00000168710,ENSG00000138756,ENSG00000111961,ENSG00000172380,ENSG00000105855,ENSG00000151322,ENSG00000132669,ENSG00000080493,ENSG00000177807,ENSG00000140022,ENSG00000162738,ENSG00000162599,ENSG00000170989,ENSG00000145721,ENSG00000123094,ENSG00000255690,ENSG00000166340,ENSG00000134352,ENSG00000172201…
M22	Endothelia	12106	342	1694	47.8563	121	2.5284	3.54671	4.7385e-24	ENSG00000126016,ENSG00000164292,ENSG00000113594,ENSG00000162407,ENSG00000138685,ENSG00000138696,ENSG00000116641,ENSG00000163110,ENSG00000168710,ENSG00000138756,ENSG00000114698,ENSG00000111961,ENSG00000119471,ENSG00000117519,ENSG00000172380,ENSG00000151322,ENSG00000132669,ENSG00000143514,ENSG00000135838,ENSG00000102935,ENSG00000129116,ENSG00000080493,ENSG00000091409,ENSG00000177807,ENSG00000162599…
M23	Astrocyte	12106	182	1714	25.768	21	0.814963	0.788248	0.872266	ENSG00000183715,ENSG00000150471,ENSG00000097021,ENSG00000104435,ENSG00000072041,ENSG00000185565,ENSG00000146072,ENSG00000072163,ENSG00000169760,ENSG00000167996,ENSG00000175175,ENSG00000116809,ENSG00000106484,ENSG00000172461,ENSG00000050393,ENSG00000155849,ENSG00000108375,ENSG00000154654,ENSG00000111728,ENSG00000100095,ENSG00000100353
M23	Microglia	12106	182	1566	23.543	25	1.06189	1.07292	0.405804	ENSG00000183715,ENSG00000111912,ENSG00000184672,ENSG00000185565,ENSG00000169760,ENSG00000204442,ENSG00000081026,ENSG00000174437,ENSG00000174136,ENSG00000165194,ENSG00000174453,ENSG00000175175,ENSG00000149451,ENSG00000137642,ENSG00000168843,ENSG00000122574,ENSG00000172461,ENSG00000140470,ENSG00000155849,ENSG00000124203,ENSG00000089041,ENSG00000203727,ENSG00000144230,ENSG00000154654,ENSG00000100095
M23	Oligodendrocyte	12106	182	2211	33.2399	57	1.71481	2.0682	1.28392e-05	ENSG00000183715,ENSG00000150471,ENSG00000107771,ENSG00000118200,ENSG00000111912,ENSG00000184672,ENSG00000072315,ENSG00000104435,ENSG00000072041,ENSG00000185565,ENSG00000170500,ENSG00000146072,ENSG00000072163,ENSG00000169760,ENSG00000204442,ENSG00000174437,ENSG00000167996,ENSG00000152503,ENSG00000153820,ENSG00000185189,ENSG00000174453,ENSG00000144935,ENSG00000175175,ENSG00000155966,ENSG00000023516…
M23	Neuron	12106	182	5889	88.5344	105	1.18598	1.44751	0.00847765	ENSG00000183715,ENSG00000077264,ENSG00000150471,ENSG00000097021,ENSG00000006125,ENSG00000107771,ENSG00000139182,ENSG00000050030,ENSG00000118200,ENSG00000158805,ENSG00000111912,ENSG00000184672,ENSG00000106351,ENSG00000105778,ENSG00000072315,ENSG00000177432,ENSG00000198914,ENSG00000104435,ENSG00000072041,ENSG00000185565,ENSG00000176903,ENSG00000158623,ENSG00000182492,ENSG00000170500,ENSG00000116141…
M23	Endothelia	12106	182	1694	25.4674	21	0.824585	0.799229	0.858676	ENSG00000183715,ENSG00000150471,ENSG00000072041,ENSG00000185565,ENSG00000182492,ENSG00000072163,ENSG00000117298,ENSG00000112697,ENSG00000107562,ENSG00000175175,ENSG00000116809,ENSG00000137642,ENSG00000151623,ENSG00000172461,ENSG00000101331,ENSG00000155849,ENSG00000132932,ENSG00000154654,ENSG00000139517,ENSG00000111728,ENSG00000130402
M24	Astrocyte	12106	311	1714	44.0322	36	0.817583	0.789292	0.923178	ENSG00000183117,ENSG00000164061,ENSG00000183826,ENSG00000075043,ENSG00000101638,ENSG00000111142,ENSG00000129159,ENSG00000169302,ENSG00000197956,ENSG00000198929,ENSG00000108309,ENSG00000144711,ENSG00000167081,ENSG00000110328,ENSG00000157020,ENSG00000146070,ENSG00000150672,ENSG00000054967,ENSG00000214944,ENSG00000134317,ENSG00000143621,ENSG00000163710,ENSG00000166598,ENSG00000069535,ENSG00000197746…
M24	Microglia	12106	311	1566	40.2301	43	1.06885	1.08217	0.342568	ENSG00000183117,ENSG00000198010,ENSG00000183826,ENSG00000101638,ENSG00000127022,ENSG00000221890,ENSG00000171435,ENSG00000198929,ENSG00000110328,ENSG00000146070,ENSG00000150672,ENSG00000166402,ENSG00000182197,ENSG00000028137,ENSG00000167680,ENSG00000107147,ENSG00000153823,ENSG00000162105,ENSG00000263528,ENSG00000126749,ENSG00000137331,ENSG00000124191,ENSG00000113269,ENSG00000132938,ENSG00000178719…
M24	Oligodendrocyte	12106	311	2211	56.8	43	0.757042	0.71249	0.985621	ENSG00000011347,ENSG00000183117,ENSG00000198010,ENSG00000099308,ENSG00000148082,ENSG00000158008,ENSG00000075043,ENSG00000154556,ENSG00000221890,ENSG00000176165,ENSG00000160753,ENSG00000115353,ENSG00000167081,ENSG00000041515,ENSG00000150672,ENSG00000126524,ENSG00000149452,ENSG00000164096,ENSG00000182197,ENSG00000028137,ENSG00000164808,ENSG00000153823,ENSG00000115295,ENSG00000162105,ENSG00000196526…
M24	Neuron	12106	311	5889	151.287	189	1.24928	1.65645	9.02847e-06	ENSG00000116604,ENSG00000011347,ENSG00000113763,ENSG00000183117,ENSG00000198010,ENSG00000163013,ENSG00000164061,ENSG00000124507,ENSG00000099308,ENSG00000173898,ENSG00000110148,ENSG00000148082,ENSG00000198542,ENSG00000167535,ENSG00000057935,ENSG00000117154,ENSG00000008256,ENSG00000008300,ENSG00000177614,ENSG00000178233,ENSG00000135709,ENSG00000183826,ENSG00000183020,ENSG00000075043,ENSG00000154556…
M24	Endothelia	12106	311	1694	43.5184	39	0.896172	0.878513	0.795395	ENSG00000164061,ENSG00000154556,ENSG00000101638,ENSG00000127022,ENSG00000111142,ENSG00000129159,ENSG00000169302,ENSG00000156453,ENSG00000198929,ENSG00000130294,ENSG00000108309,ENSG00000144711,ENSG00000167081,ENSG00000110328,ENSG00000146070,ENSG00000149452,ENSG00000214944,ENSG00000134317,ENSG00000145147,ENSG00000137331,ENSG00000137845,ENSG00000113269,ENSG00000132938,ENSG00000166598,ENSG00000069535…
M25	Astrocyte	12106	437	1714	61.8716	44	0.71115	0.670369	0.9962	ENSG00000198898,ENSG00000111669,ENSG00000204116,ENSG00000162188,ENSG00000135624,ENSG00000151729,ENSG00000177889,ENSG00000198886,ENSG00000132341,ENSG00000096092,ENSG00000116030,ENSG00000111837,ENSG00000132424,ENSG00000196072,ENSG00000120438,ENSG00000171202,ENSG00000187601,ENSG00000103160,ENSG00000152556,ENSG00000111229,ENSG00000113068,ENSG00000110318,ENSG00000089123,ENSG00000102898,ENSG00000164062…
M25	Microglia	12106	437	1566	56.5292	25	0.44225	0.398828	1	ENSG00000132341,ENSG00000134265,ENSG00000168291,ENSG00000134072,ENSG00000113552,ENSG00000164032,ENSG00000168792,ENSG00000116455,ENSG00000153012,ENSG00000131697,ENSG00000168032,ENSG00000102898,ENSG00000204856,ENSG00000109265,ENSG00000115365,ENSG00000109189,ENSG00000114784,ENSG00000174132,ENSG00000174080,ENSG00000129559,ENSG00000160888,ENSG00000101460,ENSG00000184792,ENSG00000126759,ENSG00000100417
M25	Oligodendrocyte	12106	437	2211	79.8122	43	0.538764	0.478314	1	ENSG00000111669,ENSG00000161021,ENSG00000162188,ENSG00000132341,ENSG00000111726,ENSG00000187601,ENSG00000148688,ENSG00000117643,ENSG00000116455,ENSG00000198804,ENSG00000168496,ENSG00000109466,ENSG00000111911,ENSG00000168032,ENSG00000121766,ENSG00000065665,ENSG00000173517,ENSG00000166863,ENSG00000008441,ENSG00000126391,ENSG00000184575,ENSG00000181915,ENSG00000151849,ENSG00000103995,ENSG00000149571…
M25	Neuron	12106	437	5889	212.58	211	0.992568	0.985094	0.580173	ENSG00000135932,ENSG00000198898,ENSG00000197885,ENSG00000158301,ENSG00000111669,ENSG00000089818,ENSG00000156976,ENSG00000161021,ENSG00000138698,ENSG00000162188,ENSG00000135624,ENSG00000151729,ENSG00000177889,ENSG00000132341,ENSG00000111530,ENSG00000014824,ENSG00000114405,ENSG00000127870,ENSG00000137409,ENSG00000151366,ENSG00000164172,ENSG00000100554,ENSG00000116030,ENSG00000111837,ENSG00000132424…
M25	Endothelia	12106	437	1694	61.1497	29	0.474246	0.427088	1	ENSG00000204116,ENSG00000198886,ENSG00000152684,ENSG00000152556,ENSG00000111229,ENSG00000113068,ENSG00000131143,ENSG00000110318,ENSG00000089123,ENSG00000111237,ENSG00000115507,ENSG00000154978,ENSG00000147100,ENSG00000155011,ENSG00000145730,ENSG00000131389,ENSG00000115594,ENSG00000099260,ENSG00000172594,ENSG00000092964,ENSG00000170946,ENSG00000093183,ENSG00000099341,ENSG00000198727,ENSG00000128739…
M27	Astrocyte	12106	104	1714	14.7246	12	0.814963	0.789367	0.817533	ENSG00000142871,ENSG00000073756,ENSG00000120738,ENSG00000116285,ENSG00000117036,ENSG00000137094,ENSG00000140443,ENSG00000171488,ENSG00000072274,ENSG00000120727,ENSG00000102119,ENSG00000074660
M27	Microglia	12106	104	1566	13.4532	14	1.04065	1.0474	0.480185	ENSG00000174576,ENSG00000073756,ENSG00000120738,ENSG00000122877,ENSG00000111859,ENSG00000122641,ENSG00000136603,ENSG00000119508,ENSG00000198561,ENSG00000125740,ENSG00000120868,ENSG00000197019,ENSG00000105755,ENSG00000074660
M27	Oligodendrocyte	12106	104	2211	18.9942	15	0.789714	0.752612	0.876171	ENSG00000163249,ENSG00000120738,ENSG00000122877,ENSG00000138166,ENSG00000181773,ENSG00000140443,ENSG00000174945,ENSG00000104341,ENSG00000127955,ENSG00000166311,ENSG00000102119,ENSG00000125740,ENSG00000164597,ENSG00000064115,ENSG00000076382
M27	Neuron	12106	104	5889	50.5911	48	0.948783	0.904121	0.728472	ENSG00000132510,ENSG00000163249,ENSG00000174576,ENSG00000120738,ENSG00000151694,ENSG00000134480,ENSG00000122877,ENSG00000181773,ENSG00000139722,ENSG00000112183,ENSG00000137094,ENSG00000122641,ENSG00000136603,ENSG00000119508,ENSG00000174945,ENSG00000157916,ENSG00000198561,ENSG00000144824,ENSG00000114744,ENSG00000104341,ENSG00000088543,ENSG00000186298,ENSG00000127955,ENSG00000166311,ENSG00000127419…
M27	Endothelia	12106	104	1694	14.5528	17	1.16816	1.20303	0.282362	ENSG00000142871,ENSG00000073756,ENSG00000120738,ENSG00000116285,ENSG00000117036,ENSG00000137094,ENSG00000140443,ENSG00000171488,ENSG00000144824,ENSG00000127955,ENSG00000072274,ENSG00000187498,ENSG00000102119,ENSG00000197019,ENSG00000135253,ENSG00000074660,ENSG00000173638
M28	Astrocyte	12106	268	1714	37.9442	47	1.23866	1.29755	0.0677235	ENSG00000168329,ENSG00000137491,ENSG00000134516,ENSG00000168918,ENSG00000123338,ENSG00000095585,ENSG00000078596,ENSG00000116774,ENSG00000165168,ENSG00000169403,ENSG00000173369,ENSG00000175899,ENSG00000171115,ENSG00000110934,ENSG00000148229,ENSG00000151702,ENSG00000138795,ENSG00000143742,ENSG00000168036,ENSG00000010671,ENSG00000260314,ENSG00000017483,ENSG00000068001,ENSG00000120709,ENSG00000171860…
M28	Microglia	12106	268	1566	34.6678	96	2.76914	3.93635	3.45816e-22	ENSG00000082074,ENSG00000107099,ENSG00000059377,ENSG00000119535,ENSG00000168329,ENSG00000182578,ENSG00000165025,ENSG00000162511,ENSG00000204472,ENSG00000137491,ENSG00000134516,ENSG00000168918,ENSG00000019582,ENSG00000169313,ENSG00000106034,ENSG00000123338,ENSG00000185811,ENSG00000163513,ENSG00000095585,ENSG00000196664,ENSG00000153071,ENSG00000159189,ENSG00000139679,ENSG00000148908,ENSG00000116774…
M28	Oligodendrocyte	12106	268	2211	48.9466	43	0.878508	0.85243	0.848999	ENSG00000107099,ENSG00000059377,ENSG00000165025,ENSG00000134516,ENSG00000169313,ENSG00000123338,ENSG00000196664,ENSG00000169403,ENSG00000115956,ENSG00000141506,ENSG00000128815,ENSG00000181631,ENSG00000182551,ENSG00000077420,ENSG00000095970,ENSG00000174125,ENSG00000109854,ENSG00000168036,ENSG00000011600,ENSG00000135917,ENSG00000260314,ENSG00000017483,ENSG00000143119,ENSG00000105851,ENSG00000121858…
M28	Neuron	12106	268	5889	130.369	127	0.974155	0.949782	0.683567	ENSG00000107099,ENSG00000119535,ENSG00000168329,ENSG00000182578,ENSG00000165025,ENSG00000162511,ENSG00000204472,ENSG00000137491,ENSG00000134516,ENSG00000168918,ENSG00000019582,ENSG00000169313,ENSG00000123338,ENSG00000185811,ENSG00000095585,ENSG00000153071,ENSG00000159189,ENSG00000139679,ENSG00000078596,ENSG00000148908,ENSG00000116774,ENSG00000165168,ENSG00000180353,ENSG00000066294,ENSG00000146192…
M28	Endothelia	12106	268	1694	37.5014	79	2.10659	2.64578	2.52922e-11	ENSG00000119535,ENSG00000168329,ENSG00000182578,ENSG00000165025,ENSG00000162511,ENSG00000137491,ENSG00000134516,ENSG00000168918,ENSG00000019582,ENSG00000106034,ENSG00000123338,ENSG00000163513,ENSG00000095585,ENSG00000139679,ENSG00000078596,ENSG00000147113,ENSG00000116774,ENSG00000165168,ENSG00000169403,ENSG00000146192,ENSG00000173369,ENSG00000175899,ENSG00000141506,ENSG00000128815,ENSG00000171115…
M29	Astrocyte	12106	216	1714	30.5819	25	0.817478	0.790547	0.886772	ENSG00000065154,ENSG00000167792,ENSG00000157933,ENSG00000172239,ENSG00000244038,ENSG00000112787,ENSG00000125743,ENSG00000187391,ENSG00000277791,ENSG00000067082,ENSG00000114520,ENSG00000180992,ENSG00000160752,ENSG00000157005,ENSG00000179242,ENSG00000112293,ENSG00000100994,ENSG00000183207,ENSG00000143373,ENSG00000080298,ENSG00000100354,ENSG00000101365,ENSG00000013275,ENSG00000214575,ENSG00000122378
M29	Microglia	12106	216	1566	27.9412	10	0.357895	0.322417	0.99999	ENSG00000065154,ENSG00000187391,ENSG00000067082,ENSG00000180992,ENSG00000145365,ENSG00000106605,ENSG00000169330,ENSG00000049860,ENSG00000170296,ENSG00000080298
M29	Oligodendrocyte	12106	216	2211	39.4495	26	0.65907	0.607831	0.995242	ENSG00000145293,ENSG00000116209,ENSG00000143653,ENSG00000110442,ENSG00000172331,ENSG00000196361,ENSG00000150768,ENSG00000123066,ENSG00000038532,ENSG00000187391,ENSG00000173542,ENSG00000160752,ENSG00000138801,ENSG00000146083,ENSG00000159788,ENSG00000157193,ENSG00000055917,ENSG00000066279,ENSG00000157005,ENSG00000179242,ENSG00000100994,ENSG00000170296,ENSG00000080298,ENSG00000105204,ENSG00000127616…
M29	Neuron	12106	216	5889	105.074	111	1.0564	1.11824	0.227985	ENSG00000138660,ENSG00000065154,ENSG00000163527,ENSG00000167792,ENSG00000145293,ENSG00000100804,ENSG00000075413,ENSG00000116209,ENSG00000182095,ENSG00000180329,ENSG00000157933,ENSG00000163875,ENSG00000198042,ENSG00000010256,ENSG00000172239,ENSG00000158864,ENSG00000116918,ENSG00000172331,ENSG00000140332,ENSG00000244038,ENSG00000041357,ENSG00000143624,ENSG00000196361,ENSG00000150768,ENSG00000005812…
M29	Endothelia	12106	216	1694	30.225	15	0.496278	0.453871	0.999639	ENSG00000065154,ENSG00000167792,ENSG00000116918,ENSG00000187391,ENSG00000067082,ENSG00000114520,ENSG00000159788,ENSG00000146674,ENSG00000157005,ENSG00000179242,ENSG00000112293,ENSG00000100994,ENSG00000126261,ENSG00000214575,ENSG00000122378
M31	Astrocyte	12106	207	1714	29.3076	60	2.04725	2.5279	1.97662e-08	ENSG00000178904,ENSG00000137561,ENSG00000105854,ENSG00000164089,ENSG00000178075,ENSG00000143603,ENSG00000130203,ENSG00000135821,ENSG00000145012,ENSG00000148053,ENSG00000127249,ENSG00000128585,ENSG00000144642,ENSG00000189221,ENSG00000115902,ENSG00000158201,ENSG00000109472,ENSG00000185920,ENSG00000130066,ENSG00000081320,ENSG00000164199,ENSG00000158966,ENSG00000185942,ENSG00000198838,ENSG00000137033…
M31	Microglia	12106	207	1566	26.777	30	1.12037	1.14348	0.279075	ENSG00000164089,ENSG00000178075,ENSG00000143603,ENSG00000130203,ENSG00000135821,ENSG00000128585,ENSG00000144642,ENSG00000172572,ENSG00000109472,ENSG00000130066,ENSG00000081320,ENSG00000198838,ENSG00000134996,ENSG00000171448,ENSG00000136237,ENSG00000141449,ENSG00000135919,ENSG00000189283,ENSG00000182050,ENSG00000152128,ENSG00000109452,ENSG00000049541,ENSG00000145416,ENSG00000100889,ENSG00000079156…
M31	Oligodendrocyte	12106	207	2211	37.8058	43	1.13739	1.1768	0.195713	ENSG00000105854,ENSG00000079482,ENSG00000135821,ENSG00000148053,ENSG00000128585,ENSG00000144642,ENSG00000151422,ENSG00000158201,ENSG00000130066,ENSG00000164199,ENSG00000161048,ENSG00000185942,ENSG00000198838,ENSG00000112312,ENSG00000152208,ENSG00000121904,ENSG00000133961,ENSG00000136237,ENSG00000058866,ENSG00000082805,ENSG00000105894,ENSG00000114126,ENSG00000117650,ENSG00000135919,ENSG00000139154…
M31	Neuron	12106	207	5889	100.696	102	1.01295	1.02599	0.45487	ENSG00000139132,ENSG00000137561,ENSG00000109911,ENSG00000105854,ENSG00000079482,ENSG00000070159,ENSG00000130203,ENSG00000135821,ENSG00000145012,ENSG00000148053,ENSG00000127249,ENSG00000128585,ENSG00000144642,ENSG00000172572,ENSG00000115902,ENSG00000127947,ENSG00000109472,ENSG00000185920,ENSG00000150551,ENSG00000130066,ENSG00000011198,ENSG00000115904,ENSG00000158966,ENSG00000161048,ENSG00000198838…
M31	Endothelia	12106	207	1694	28.9656	62	2.14047	2.68975	1.7789e-09	ENSG00000139132,ENSG00000178904,ENSG00000137561,ENSG00000105854,ENSG00000164089,ENSG00000178075,ENSG00000143603,ENSG00000130203,ENSG00000135821,ENSG00000145012,ENSG00000148053,ENSG00000127249,ENSG00000128585,ENSG00000144642,ENSG00000189221,ENSG00000115902,ENSG00000158201,ENSG00000109472,ENSG00000185920,ENSG00000130066,ENSG00000081320,ENSG00000164199,ENSG00000158966,ENSG00000185942,ENSG00000198838…
M32	Astrocyte	12106	207	1714	29.3076	41	1.39895	1.50962	0.0149544	ENSG00000145555,ENSG00000018625,ENSG00000089472,ENSG00000031081,ENSG00000171791,ENSG00000046889,ENSG00000134569,ENSG00000170075,ENSG00000154856,ENSG00000214114,ENSG00000146828,ENSG00000109113,ENSG00000166123,ENSG00000154930,ENSG00000122756,ENSG00000166033,ENSG00000177917,ENSG00000153208,ENSG00000175390,ENSG00000144908,ENSG00000068078,ENSG00000165730,ENSG00000078808,ENSG00000111321,ENSG00000101400…
M32	Microglia	12106	207	1566	26.777	22	0.821602	0.797556	0.866348	ENSG00000171791,ENSG00000103335,ENSG00000213445,ENSG00000109113,ENSG00000146094,ENSG00000153208,ENSG00000099337,ENSG00000144908,ENSG00000091073,ENSG00000107679,ENSG00000141510,ENSG00000137393,ENSG00000107738,ENSG00000175556,ENSG00000117984,ENSG00000109861,ENSG00000096968,ENSG00000168016,ENSG00000130052,ENSG00000125753,ENSG00000184497,ENSG00000120071
M32	Oligodendrocyte	12106	207	2211	37.8058	26	0.687725	0.638644	0.989884	ENSG00000179364,ENSG00000018625,ENSG00000174442,ENSG00000171791,ENSG00000046889,ENSG00000170075,ENSG00000154856,ENSG00000169291,ENSG00000188559,ENSG00000141639,ENSG00000143553,ENSG00000153208,ENSG00000068078,ENSG00000107679,ENSG00000050820,ENSG00000101400,ENSG00000169607,ENSG00000178538,ENSG00000133119,ENSG00000085999,ENSG00000153044,ENSG00000112576,ENSG00000100154,ENSG00000161677,ENSG00000185551…
M32	Neuron	12106	207	5889	100.696	85	0.844127	0.731674	0.988637	ENSG00000167566,ENSG00000145555,ENSG00000143458,ENSG00000179364,ENSG00000018625,ENSG00000174442,ENSG00000171791,ENSG00000134569,ENSG00000170075,ENSG00000154856,ENSG00000115325,ENSG00000061273,ENSG00000146067,ENSG00000188786,ENSG00000113300,ENSG00000146828,ENSG00000105397,ENSG00000213445,ENSG00000177853,ENSG00000166123,ENSG00000158467,ENSG00000169291,ENSG00000177125,ENSG00000154930,ENSG00000104219…
M32	Endothelia	12106	207	1694	28.9656	36	1.24285	1.30033	0.0958335	ENSG00000145555,ENSG00000018625,ENSG00000089472,ENSG00000031081,ENSG00000171791,ENSG00000046889,ENSG00000134569,ENSG00000170075,ENSG00000154856,ENSG00000213445,ENSG00000109113,ENSG00000166123,ENSG00000154930,ENSG00000122756,ENSG00000166033,ENSG00000153208,ENSG00000099204,ENSG00000144908,ENSG00000068078,ENSG00000165730,ENSG00000078808,ENSG00000111321,ENSG00000101400,ENSG00000164330,ENSG00000175556…
M33	Astrocyte	12106	135	1714	19.1137	24	1.25565	1.3153	0.138872	ENSG00000163659,ENSG00000124702,ENSG00000120278,ENSG00000164949,ENSG00000143384,ENSG00000004799,ENSG00000159388,ENSG00000109919,ENSG00000092969,ENSG00000113916,ENSG00000141232,ENSG00000170345,ENSG00000163479,ENSG00000177606,ENSG00000006652,ENSG00000178035,ENSG00000110172,ENSG00000137802,ENSG00000116761,ENSG00000145020,ENSG00000123975,ENSG00000099800,ENSG00000167604,ENSG00000254858
M33	Microglia	12106	135	1566	17.4632	15	0.858947	0.839805	0.773718	ENSG00000143384,ENSG00000004799,ENSG00000159388,ENSG00000095564,ENSG00000151474,ENSG00000170345,ENSG00000177606,ENSG00000107968,ENSG00000133874,ENSG00000198169,ENSG00000108523,ENSG00000166986,ENSG00000108654,ENSG00000167604,ENSG00000102524
M33	Oligodendrocyte	12106	135	2211	24.656	13	0.527256	0.473817	0.998266	ENSG00000120278,ENSG00000164949,ENSG00000122566,ENSG00000159388,ENSG00000151474,ENSG00000170345,ENSG00000135392,ENSG00000198900,ENSG00000133874,ENSG00000138346,ENSG00000123975,ENSG00000035403,ENSG00000167604
M33	Neuron	12106	135	5889	65.6712	50	0.761369	0.61778	0.99758	ENSG00000164885,ENSG00000124702,ENSG00000185650,ENSG00000120278,ENSG00000158882,ENSG00000122566,ENSG00000004799,ENSG00000159388,ENSG00000109919,ENSG00000068878,ENSG00000113916,ENSG00000175087,ENSG00000151474,ENSG00000170345,ENSG00000168906,ENSG00000145911,ENSG00000174151,ENSG00000177606,ENSG00000153207,ENSG00000147144,ENSG00000136280,ENSG00000258986,ENSG00000173621,ENSG00000110172,ENSG00000137802…
M33	Endothelia	12106	135	1694	18.8906	23	1.21753	1.26579	0.182264	ENSG00000163659,ENSG00000185650,ENSG00000120278,ENSG00000121578,ENSG00000164949,ENSG00000143384,ENSG00000004799,ENSG00000159388,ENSG00000092969,ENSG00000113916,ENSG00000170345,ENSG00000145911,ENSG00000177606,ENSG00000006652,ENSG00000178035,ENSG00000110172,ENSG00000137802,ENSG00000090006,ENSG00000116761,ENSG00000108654,ENSG00000035403,ENSG00000167604,ENSG00000168646
M34	Astrocyte	12106	198	1714	28.0334	29	1.03448	1.0411	0.452454	ENSG00000189043,ENSG00000118680,ENSG00000134056,ENSG00000136810,ENSG00000183978,ENSG00000104904,ENSG00000107874,ENSG00000143198,ENSG00000162961,ENSG00000166136,ENSG00000136930,ENSG00000172889,ENSG00000162735,ENSG00000116288,ENSG00000106153,ENSG00000164683,ENSG00000188612,ENSG00000111775,ENSG00000010319,ENSG00000168936,ENSG00000135541,ENSG00000114956,ENSG00000205323,ENSG00000128272,ENSG00000165443…
M34	Microglia	12106	198	1566	25.6128	14	0.546603	0.507727	0.997256	ENSG00000189043,ENSG00000169241,ENSG00000171988,ENSG00000170515,ENSG00000142507,ENSG00000126214,ENSG00000135541,ENSG00000272325,ENSG00000157404,ENSG00000198756,ENSG00000178896,ENSG00000178177,ENSG00000198885,ENSG00000182463
M34	Oligodendrocyte	12106	198	2211	36.1621	15	0.414799	0.362525	0.999995	ENSG00000189043,ENSG00000136810,ENSG00000004779,ENSG00000150779,ENSG00000106554,ENSG00000198492,ENSG00000168137,ENSG00000177182,ENSG00000188994,ENSG00000169122,ENSG00000066056,ENSG00000165443,ENSG00000157404,ENSG00000178177,ENSG00000182463
M34	Neuron	12106	198	5889	96.3177	77	0.799438	0.667484	0.997841	ENSG00000189043,ENSG00000173915,ENSG00000138629,ENSG00000134056,ENSG00000173113,ENSG00000086065,ENSG00000117118,ENSG00000004779,ENSG00000112110,ENSG00000122034,ENSG00000150779,ENSG00000159479,ENSG00000171988,ENSG00000143198,ENSG00000106554,ENSG00000059728,ENSG00000166136,ENSG00000170855,ENSG00000136930,ENSG00000063854,ENSG00000104687,ENSG00000182809,ENSG00000172889,ENSG00000198492,ENSG00000116586…
M34	Endothelia	12106	198	1694	27.7063	14	0.505301	0.463249	0.999264	ENSG00000118680,ENSG00000172889,ENSG00000186994,ENSG00000010319,ENSG00000135541,ENSG00000154783,ENSG00000205323,ENSG00000066056,ENSG00000165443,ENSG00000164929,ENSG00000198756,ENSG00000182463,ENSG00000105538,ENSG00000105699
M35	Astrocyte	12106	56	1714	7.92863	6	0.756751	0.726622	0.823479	ENSG00000176597,ENSG00000104517,ENSG00000134532,ENSG00000249915,ENSG00000164604,ENSG00000119707
M35	Microglia	12106	56	1566	7.24401	5	0.690225	0.658786	0.866658	ENSG00000134698,ENSG00000176597,ENSG00000162924,ENSG00000126870,ENSG00000113369
M35	Oligodendrocyte	12106	56	2211	10.2277	7	0.684419	0.638215	0.907322	ENSG00000162924,ENSG00000104517,ENSG00000134532,ENSG00000109881,ENSG00000113369,ENSG00000176208,ENSG00000159147
M35	Neuron	12106	56	5889	27.2414	19	0.697469	0.540662	0.990967	ENSG00000198719,ENSG00000119782,ENSG00000174013,ENSG00000134698,ENSG00000176597,ENSG00000133812,ENSG00000101901,ENSG00000258890,ENSG00000104517,ENSG00000134532,ENSG00000024048,ENSG00000115657,ENSG00000058056,ENSG00000113211,ENSG00000112406,ENSG00000109881,ENSG00000119707,ENSG00000198931,ENSG00000159147
M35	Endothelia	12106	56	1694	7.83611	4	0.510457	0.471576	0.963581	ENSG00000165195,ENSG00000176597,ENSG00000134532,ENSG00000164604
M36	Astrocyte	12106	143	1714	20.2463	24	1.1854	1.22592	0.212963	ENSG00000167526,ENSG00000112306,ENSG00000142676,ENSG00000188846,ENSG00000149806,ENSG00000105372,ENSG00000176386,ENSG00000173457,ENSG00000197958,ENSG00000164587,ENSG00000142541,ENSG00000189171,ENSG00000110321,ENSG00000198755,ENSG00000147677,ENSG00000118181,ENSG00000117448,ENSG00000169991,ENSG00000079257,ENSG00000149380,ENSG00000083845,ENSG00000185813,ENSG00000174444,ENSG00000185608
M36	Microglia	12106	143	1566	18.4981	17	0.919013	0.907066	0.683512	ENSG00000112306,ENSG00000142676,ENSG00000142937,ENSG00000125691,ENSG00000149806,ENSG00000105372,ENSG00000204628,ENSG00000164587,ENSG00000142541,ENSG00000110321,ENSG00000118181,ENSG00000106617,ENSG00000139233,ENSG00000229453,ENSG00000138772,ENSG00000083845,ENSG00000100410
M36	Oligodendrocyte	12106	143	2211	26.117	15	0.574337	0.521236	0.996399	ENSG00000167526,ENSG00000112306,ENSG00000157734,ENSG00000137106,ENSG00000115649,ENSG00000149806,ENSG00000204406,ENSG00000105372,ENSG00000164587,ENSG00000189171,ENSG00000140365,ENSG00000106399,ENSG00000277972,ENSG00000185813,ENSG00000100092
M36	Neuron	12106	143	5889	69.5628	53	0.761902	0.61828	0.99807	ENSG00000167526,ENSG00000112306,ENSG00000142676,ENSG00000157734,ENSG00000142937,ENSG00000125691,ENSG00000143811,ENSG00000138175,ENSG00000117691,ENSG00000115649,ENSG00000149806,ENSG00000204406,ENSG00000105372,ENSG00000142546,ENSG00000110700,ENSG00000163517,ENSG00000158109,ENSG00000197958,ENSG00000164587,ENSG00000132635,ENSG00000107929,ENSG00000142541,ENSG00000189171,ENSG00000106803,ENSG00000230124…
M36	Endothelia	12106	143	1694	20.0101	22	1.09945	1.11903	0.349825	ENSG00000112306,ENSG00000142937,ENSG00000125691,ENSG00000115649,ENSG00000105372,ENSG00000204628,ENSG00000164587,ENSG00000142541,ENSG00000189171,ENSG00000106803,ENSG00000110321,ENSG00000118181,ENSG00000138772,ENSG00000079257,ENSG00000105835,ENSG00000104064,ENSG00000149380,ENSG00000128917,ENSG00000083845,ENSG00000185813,ENSG00000185608,ENSG00000131097
M37	Astrocyte	12106	316	1714	44.7401	44	0.983457	0.980275	0.573324	ENSG00000113494,ENSG00000132164,ENSG00000171951,ENSG00000076248,ENSG00000009694,ENSG00000143324,ENSG00000133687,ENSG00000164197,ENSG00000015592,ENSG00000182132,ENSG00000182256,ENSG00000175040,ENSG00000168824,ENSG00000123453,ENSG00000084073,ENSG00000171724,ENSG00000116584,ENSG00000164651,ENSG00000217236,ENSG00000137942,ENSG00000007080,ENSG00000187398,ENSG00000162551,ENSG00000077782,ENSG00000103495…
M37	Microglia	12106	316	1566	40.8769	38	0.92962	0.917999	0.712268	ENSG00000171951,ENSG00000106078,ENSG00000138653,ENSG00000102531,ENSG00000171004,ENSG00000182132,ENSG00000182256,ENSG00000254585,ENSG00000164120,ENSG00000109689,ENSG00000187398,ENSG00000143333,ENSG00000171365,ENSG00000153707,ENSG00000083067,ENSG00000204764,ENSG00000143322,ENSG00000144229,ENSG00000082556,ENSG00000162241,ENSG00000211445,ENSG00000134243,ENSG00000151665,ENSG00000165244,ENSG00000150977…
M37	Oligodendrocyte	12106	316	2211	57.7132	53	0.918334	0.899475	0.777284	ENSG00000071205,ENSG00000132164,ENSG00000171951,ENSG00000102531,ENSG00000188517,ENSG00000143324,ENSG00000164512,ENSG00000164197,ENSG00000015592,ENSG00000182132,ENSG00000182256,ENSG00000170396,ENSG00000166619,ENSG00000187398,ENSG00000164086,ENSG00000100644,ENSG00000155886,ENSG00000153707,ENSG00000083067,ENSG00000160746,ENSG00000171044,ENSG00000118961,ENSG00000070882,ENSG00000115457,ENSG00000036672…
M37	Neuron	12106	316	5889	153.719	180	1.17097	1.40972	0.0016296	ENSG00000087085,ENSG00000071205,ENSG00000130224,ENSG00000189127,ENSG00000132164,ENSG00000171951,ENSG00000007402,ENSG00000132854,ENSG00000106078,ENSG00000171551,ENSG00000118257,ENSG00000112294,ENSG00000156925,ENSG00000115665,ENSG00000171004,ENSG00000009694,ENSG00000188517,ENSG00000143324,ENSG00000164512,ENSG00000133687,ENSG00000091844,ENSG00000164197,ENSG00000162627,ENSG00000015592,ENSG00000167658…
M37	Endothelia	12106	316	1694	44.2181	41	0.927223	0.914281	0.725424	ENSG00000132164,ENSG00000171951,ENSG00000132854,ENSG00000156925,ENSG00000133687,ENSG00000182132,ENSG00000182256,ENSG00000188157,ENSG00000168824,ENSG00000123453,ENSG00000171724,ENSG00000116584,ENSG00000164651,ENSG00000217236,ENSG00000248485,ENSG00000137942,ENSG00000187398,ENSG00000102780,ENSG00000143333,ENSG00000188133,ENSG00000120318,ENSG00000077782,ENSG00000103495,ENSG00000115306,ENSG00000155886…
M38	Astrocyte	12106	68	1714	9.62762	13	1.35028	1.43633	0.157614	ENSG00000144655,ENSG00000119013,ENSG00000171223,ENSG00000169740,ENSG00000127884,ENSG00000123358,ENSG00000228474,ENSG00000204370,ENSG00000099860,ENSG00000162755,ENSG00000120129,ENSG00000136826,ENSG00000099942
M38	Microglia	12106	68	1566	8.7963	9	1.02316	1.02685	0.524951	ENSG00000171223,ENSG00000123358,ENSG00000165030,ENSG00000153234,ENSG00000099860,ENSG00000171819,ENSG00000136826,ENSG00000188921,ENSG00000142178
M38	Oligodendrocyte	12106	68	2211	12.4193	6	0.483119	0.431574	0.990708	ENSG00000127884,ENSG00000214253,ENSG00000099860,ENSG00000120129,ENSG00000184903,ENSG00000168172
M38	Neuron	12106	68	5889	33.0788	22	0.665078	0.503072	0.997814	ENSG00000119013,ENSG00000171223,ENSG00000169740,ENSG00000123358,ENSG00000214253,ENSG00000153234,ENSG00000204370,ENSG00000099860,ENSG00000137801,ENSG00000117620,ENSG00000131495,ENSG00000120129,ENSG00000163888,ENSG00000115232,ENSG00000186675,ENSG00000114354,ENSG00000111481,ENSG00000120645,ENSG00000160299,ENSG00000103365,ENSG00000184903,ENSG00000168172
M38	Endothelia	12106	68	1694	9.51528	10	1.05094	1.06009	0.485307	ENSG00000144655,ENSG00000171223,ENSG00000123358,ENSG00000099860,ENSG00000137801,ENSG00000120129,ENSG00000177098,ENSG00000136826,ENSG00000099942,ENSG00000184903
M39	Astrocyte	12106	113	1714	15.9988	7	0.437532	0.397949	0.997699	ENSG00000151465,ENSG00000196591,ENSG00000107937,ENSG00000011451,ENSG00000166165,ENSG00000095906,ENSG00000162618
M39	Microglia	12106	113	1566	14.6174	9	0.615705	0.580058	0.964863	ENSG00000076344,ENSG00000185787,ENSG00000072195,ENSG00000160087,ENSG00000171777,ENSG00000162066,ENSG00000185818,ENSG00000067836,ENSG00000091106
M39	Oligodendrocyte	12106	113	2211	20.6379	11	0.532999	0.480078	0.996048	ENSG00000154803,ENSG00000061938,ENSG00000197548,ENSG00000167325,ENSG00000174943,ENSG00000174953,ENSG00000166165,ENSG00000134153,ENSG00000171793,ENSG00000021762,ENSG00000100241
M39	Neuron	12106	113	5889	54.9692	60	1.09152	1.19712	0.195772	ENSG00000131584,ENSG00000151465,ENSG00000205903,ENSG00000076344,ENSG00000154803,ENSG00000196591,ENSG00000197530,ENSG00000136213,ENSG00000165684,ENSG00000164880,ENSG00000185324,ENSG00000061938,ENSG00000164877,ENSG00000103197,ENSG00000172932,ENSG00000182272,ENSG00000185787,ENSG00000133243,ENSG00000108840,ENSG00000133275,ENSG00000160972,ENSG00000174943,ENSG00000149930,ENSG00000072195,ENSG00000109736…
M39	Endothelia	12106	113	1694	15.8122	9	0.569182	0.529423	0.982925	ENSG00000151465,ENSG00000107937,ENSG00000011451,ENSG00000166165,ENSG00000109072,ENSG00000162618,ENSG00000185633,ENSG00000129968,ENSG00000184470
M40	Astrocyte	12106	349	1714	49.4124	25	0.505946	0.459973	0.999987	ENSG00000136295,ENSG00000162267,ENSG00000084112,ENSG00000182004,ENSG00000167524,ENSG00000164638,ENSG00000115760,ENSG00000219607,ENSG00000123131,ENSG00000178568,ENSG00000174721,ENSG00000150967,ENSG00000133401,ENSG00000114902,ENSG00000140522,ENSG00000167508,ENSG00000119878,ENSG00000145824,ENSG00000175832,ENSG00000197122,ENSG00000169710,ENSG00000090266,ENSG00000167552,ENSG00000184047,ENSG00000110975
M40	Microglia	12106	349	1566	45.1457	26	0.575913	0.534064	0.999661	ENSG00000139200,ENSG00000197283,ENSG00000170485,ENSG00000080845,ENSG00000118855,ENSG00000116649,ENSG00000231925,ENSG00000185630,ENSG00000137103,ENSG00000107281,ENSG00000079102,ENSG00000105426,ENSG00000196405,ENSG00000117569,ENSG00000008018,ENSG00000109654,ENSG00000075711,ENSG00000007541,ENSG00000154258,ENSG00000164733,ENSG00000102271,ENSG00000141837,ENSG00000105088,ENSG00000105514,ENSG00000104976…
M40	Oligodendrocyte	12106	349	2211	63.7402	49	0.768745	0.724898	0.986101	ENSG00000155506,ENSG00000170485,ENSG00000029993,ENSG00000118855,ENSG00000171798,ENSG00000184489,ENSG00000136824,ENSG00000165238,ENSG00000079102,ENSG00000196405,ENSG00000117569,ENSG00000142408,ENSG00000160460,ENSG00000188811,ENSG00000113583,ENSG00000205302,ENSG00000109654,ENSG00000001561,ENSG00000123131,ENSG00000178568,ENSG00000120334,ENSG00000075711,ENSG00000054523,ENSG00000151746,ENSG00000105737…
M40	Neuron	12106	349	5889	169.772	195	1.1486	1.34825	0.003592	ENSG00000146216,ENSG00000155506,ENSG00000132535,ENSG00000139200,ENSG00000090975,ENSG00000135439,ENSG00000197283,ENSG00000153815,ENSG00000184545,ENSG00000170485,ENSG00000090615,ENSG00000029993,ENSG00000288701,ENSG00000105576,ENSG00000141252,ENSG00000096070,ENSG00000115524,ENSG00000080845,ENSG00000090565,ENSG00000116852,ENSG00000072518,ENSG00000152795,ENSG00000136295,ENSG00000171475,ENSG00000181790…
M40	Endothelia	12106	349	1694	48.8358	17	0.348105	0.307797	1	ENSG00000136295,ENSG00000162267,ENSG00000184489,ENSG00000123933,ENSG00000167524,ENSG00000115760,ENSG00000219607,ENSG00000178568,ENSG00000174721,ENSG00000133401,ENSG00000134871,ENSG00000119878,ENSG00000145824,ENSG00000132964,ENSG00000175832,ENSG00000008438,ENSG00000090266
M41	Astrocyte	12106	155	1714	21.9453	12	0.546814	0.505345	0.995283	ENSG00000179222,ENSG00000112149,ENSG00000142657,ENSG00000266964,ENSG00000047662,ENSG00000177576,ENSG00000156110,ENSG00000198822,ENSG00000117906,ENSG00000166128,ENSG00000178031,ENSG00000116147
M41	Microglia	12106	155	1566	20.0504	19	0.947613	0.939557	0.636045	ENSG00000183023,ENSG00000181072,ENSG00000139915,ENSG00000198825,ENSG00000137563,ENSG00000182836,ENSG00000188352,ENSG00000112149,ENSG00000135324,ENSG00000136750,ENSG00000198522,ENSG00000179603,ENSG00000128294,ENSG00000089094,ENSG00000198822,ENSG00000104814,ENSG00000131941,ENSG00000100462,ENSG00000116147
M41	Oligodendrocyte	12106	155	2211	28.3087	33	1.16572	1.21368	0.188819	ENSG00000183023,ENSG00000169213,ENSG00000179222,ENSG00000013293,ENSG00000139116,ENSG00000139915,ENSG00000198825,ENSG00000083799,ENSG00000137563,ENSG00000115091,ENSG00000182836,ENSG00000160131,ENSG00000136750,ENSG00000131473,ENSG00000138688,ENSG00000117758,ENSG00000179603,ENSG00000185420,ENSG00000107669,ENSG00000266964,ENSG00000153132,ENSG00000148832,ENSG00000139083,ENSG00000075223,ENSG00000066777…
M41	Neuron	12106	155	5889	75.4002	73	0.968167	0.939055	0.680227	ENSG00000169255,ENSG00000115944,ENSG00000183023,ENSG00000169213,ENSG00000127995,ENSG00000179222,ENSG00000181072,ENSG00000114023,ENSG00000156471,ENSG00000060982,ENSG00000139116,ENSG00000139915,ENSG00000198825,ENSG00000083799,ENSG00000137563,ENSG00000198780,ENSG00000115091,ENSG00000182836,ENSG00000160131,ENSG00000188352,ENSG00000112305,ENSG00000158290,ENSG00000166411,ENSG00000184182,ENSG00000069509…
M41	Endothelia	12106	155	1694	21.6892	13	0.599375	0.55934	0.988294	ENSG00000179222,ENSG00000131473,ENSG00000266964,ENSG00000177576,ENSG00000139083,ENSG00000075223,ENSG00000156110,ENSG00000198822,ENSG00000108622,ENSG00000117906,ENSG00000166128,ENSG00000178031,ENSG00000116147
M42	Astrocyte	12106	201	1714	28.4581	22	0.773066	0.741878	0.926173	ENSG00000116251,ENSG00000155959,ENSG00000134308,ENSG00000005022,ENSG00000108561,ENSG00000164258,ENSG00000180879,ENSG00000132432,ENSG00000035141,ENSG00000052126,ENSG00000158092,ENSG00000005469,ENSG00000107175,ENSG00000171135,ENSG00000145022,ENSG00000138061,ENSG00000089009,ENSG00000130522,ENSG00000155100,ENSG00000111371,ENSG00000173482,ENSG00000121671
M42	Microglia	12106	201	1566	26.0008	15	0.576905	0.538386	0.995322	ENSG00000116251,ENSG00000081721,ENSG00000132432,ENSG00000052126,ENSG00000123684,ENSG00000136897,ENSG00000124614,ENSG00000130508,ENSG00000179331,ENSG00000130522,ENSG00000089248,ENSG00000264364,ENSG00000170571,ENSG00000172345,ENSG00000119514
M42	Oligodendrocyte	12106	201	2211	36.71	27	0.735495	0.690696	0.973553	ENSG00000018510,ENSG00000134308,ENSG00000148090,ENSG00000031003,ENSG00000178449,ENSG00000165672,ENSG00000113312,ENSG00000005022,ENSG00000197982,ENSG00000180879,ENSG00000084733,ENSG00000052126,ENSG00000123106,ENSG00000135828,ENSG00000068831,ENSG00000179331,ENSG00000145022,ENSG00000070501,ENSG00000168675,ENSG00000070761,ENSG00000185009,ENSG00000165480,ENSG00000122679,ENSG00000134294,ENSG00000264364…
M42	Neuron	12106	201	5889	97.7771	78	0.797733	0.665055	0.998127	ENSG00000018510,ENSG00000116251,ENSG00000127184,ENSG00000151247,ENSG00000155959,ENSG00000134308,ENSG00000091527,ENSG00000150787,ENSG00000242485,ENSG00000181061,ENSG00000183648,ENSG00000148834,ENSG00000031003,ENSG00000165672,ENSG00000136888,ENSG00000137168,ENSG00000158773,ENSG00000121022,ENSG00000122068,ENSG00000093144,ENSG00000138382,ENSG00000005022,ENSG00000108561,ENSG00000180879,ENSG00000149564…
M42	Endothelia	12106	201	1694	28.1261	15	0.533313	0.491196	0.998685	ENSG00000116251,ENSG00000149564,ENSG00000132432,ENSG00000158092,ENSG00000005469,ENSG00000124614,ENSG00000068831,ENSG00000171135,ENSG00000145022,ENSG00000168675,ENSG00000138061,ENSG00000130522,ENSG00000155100,ENSG00000111371,ENSG00000173482
M43	Astrocyte	12106	62	1714	8.77813	4	0.455678	0.416798	0.982202	ENSG00000139767,ENSG00000070886,ENSG00000049449,ENSG00000164434
M43	Microglia	12106	62	1566	8.02016	9	1.12217	1.14371	0.410203	ENSG00000148408,ENSG00000151067,ENSG00000173406,ENSG00000176884,ENSG00000180776,ENSG00000173890,ENSG00000183783,ENSG00000185666,ENSG00000166130
M43	Oligodendrocyte	12106	62	2211	11.3235	16	1.41299	1.56063	0.0881699	ENSG00000148408,ENSG00000139767,ENSG00000151067,ENSG00000082497,ENSG00000173406,ENSG00000135048,ENSG00000176884,ENSG00000112320,ENSG00000180828,ENSG00000180776,ENSG00000154928,ENSG00000164434,ENSG00000170185,ENSG00000073111,ENSG00000161800,ENSG00000185666
M43	Neuron	12106	62	5889	30.1601	39	1.2931	1.79526	0.0165618	ENSG00000148408,ENSG00000139767,ENSG00000151067,ENSG00000103723,ENSG00000135299,ENSG00000173406,ENSG00000176884,ENSG00000112320,ENSG00000165914,ENSG00000180828,ENSG00000159023,ENSG00000085511,ENSG00000221968,ENSG00000180776,ENSG00000214357,ENSG00000175274,ENSG00000161013,ENSG00000166004,ENSG00000070886,ENSG00000183783,ENSG00000212864,ENSG00000100433,ENSG00000154928,ENSG00000164434,ENSG00000213626…
M43	Endothelia	12106	62	1694	8.6757	5	0.576323	0.537817	0.946744	ENSG00000139767,ENSG00000137273,ENSG00000070886,ENSG00000164434,ENSG00000138606
M44	Astrocyte	12106	70	1714	9.91079	9	0.908101	0.893965	0.674566	ENSG00000027075,ENSG00000133116,ENSG00000176533,ENSG00000198947,ENSG00000112541,ENSG00000149212,ENSG00000088833,ENSG00000108774,ENSG00000110786
M44	Microglia	12106	70	1566	9.05501	14	1.5461	1.68869	0.0622118	ENSG00000171408,ENSG00000027075,ENSG00000109501,ENSG00000157600,ENSG00000176533,ENSG00000185668,ENSG00000198947,ENSG00000115616,ENSG00000112541,ENSG00000189050,ENSG00000119547,ENSG00000125869,ENSG00000131771,ENSG00000122035
M44	Oligodendrocyte	12106	70	2211	12.7846	11	0.860412	0.833572	0.755522	ENSG00000171408,ENSG00000114757,ENSG00000137460,ENSG00000181195,ENSG00000027075,ENSG00000133116,ENSG00000176533,ENSG00000198947,ENSG00000112541,ENSG00000141404,ENSG00000137571
M44	Neuron	12106	70	5889	34.0517	38	1.11595	1.25526	0.204115	ENSG00000164488,ENSG00000181656,ENSG00000171408,ENSG00000114757,ENSG00000128578,ENSG00000100473,ENSG00000181195,ENSG00000109501,ENSG00000163681,ENSG00000188735,ENSG00000116337,ENSG00000184845,ENSG00000196549,ENSG00000176533,ENSG00000120049,ENSG00000123612,ENSG00000135824,ENSG00000124493,ENSG00000185668,ENSG00000198947,ENSG00000112541,ENSG00000025039,ENSG00000141404,ENSG00000077522,ENSG00000149212…
M44	Endothelia	12106	70	1694	9.79514	7	0.71464	0.681637	0.87612	ENSG00000027075,ENSG00000198947,ENSG00000112541,ENSG00000025039,ENSG00000172059,ENSG00000128573,ENSG00000110786
M45	Astrocyte	12106	101	1714	14.2999	13	0.9091	0.894854	0.688022	ENSG00000135338,ENSG00000254999,ENSG00000196465,ENSG00000188730,ENSG00000141552,ENSG00000137601,ENSG00000112335,ENSG00000153037,ENSG00000044574,ENSG00000140280,ENSG00000156050,ENSG00000086504,ENSG00000105701
M45	Microglia	12106	101	1566	13.0651	7	0.535779	0.498993	0.981869	ENSG00000163053,ENSG00000166313,ENSG00000057657,ENSG00000143398,ENSG00000143924,ENSG00000044574,ENSG00000277443
M45	Oligodendrocyte	12106	101	2211	18.4463	12	0.650537	0.60128	0.969405	ENSG00000145920,ENSG00000123374,ENSG00000188730,ENSG00000143190,ENSG00000184178,ENSG00000138376,ENSG00000143924,ENSG00000167363,ENSG00000167553,ENSG00000277443,ENSG00000178691,ENSG00000100276
M45	Neuron	12106	101	5889	49.1318	44	0.895551	0.813546	0.869992	ENSG00000163053,ENSG00000132879,ENSG00000171159,ENSG00000115053,ENSG00000184867,ENSG00000107581,ENSG00000254999,ENSG00000172500,ENSG00000166313,ENSG00000145920,ENSG00000175602,ENSG00000242173,ENSG00000157778,ENSG00000143774,ENSG00000123374,ENSG00000198680,ENSG00000188730,ENSG00000130822,ENSG00000143190,ENSG00000147164,ENSG00000105963,ENSG00000185728,ENSG00000156990,ENSG00000186063,ENSG00000174804…
M45	Endothelia	12106	101	1694	14.133	7	0.495295	0.455481	0.99135	ENSG00000196465,ENSG00000188730,ENSG00000168938,ENSG00000153037,ENSG00000044574,ENSG00000140280,ENSG00000177464
M47	Astrocyte	12106	128	1714	18.1226	9	0.496618	0.45571	0.996076	ENSG00000197362,ENSG00000148926,ENSG00000221869,ENSG00000124762,ENSG00000033178,ENSG00000079459,ENSG00000165533,ENSG00000080709,ENSG00000128016
M47	Microglia	12106	128	1566	16.5577	17	1.02671	1.03114	0.493215	ENSG00000018280,ENSG00000184557,ENSG00000148926,ENSG00000077238,ENSG00000173559,ENSG00000137462,ENSG00000144554,ENSG00000152229,ENSG00000116273,ENSG00000144355,ENSG00000151348,ENSG00000138639,ENSG00000080709,ENSG00000125810,ENSG00000181690,ENSG00000128016,ENSG00000159216
M47	Oligodendrocyte	12106	128	2211	23.3775	23	0.983852	0.980107	0.570867	ENSG00000018280,ENSG00000184557,ENSG00000114127,ENSG00000112715,ENSG00000107438,ENSG00000170962,ENSG00000137462,ENSG00000116984,ENSG00000144554,ENSG00000120156,ENSG00000164327,ENSG00000079459,ENSG00000103175,ENSG00000144355,ENSG00000160446,ENSG00000106355,ENSG00000128016,ENSG00000159216,ENSG00000134758,ENSG00000139974,ENSG00000139746,ENSG00000135124,ENSG00000166507
M47	Neuron	12106	128	5889	62.266	51	0.819067	0.696624	0.982095	ENSG00000163638,ENSG00000130340,ENSG00000060339,ENSG00000112715,ENSG00000081059,ENSG00000124762,ENSG00000198160,ENSG00000077238,ENSG00000116984,ENSG00000185219,ENSG00000118363,ENSG00000153574,ENSG00000070785,ENSG00000112679,ENSG00000090686,ENSG00000163155,ENSG00000120156,ENSG00000108039,ENSG00000116273,ENSG00000079459,ENSG00000183891,ENSG00000043514,ENSG00000126217,ENSG00000144355,ENSG00000111300…
M47	Endothelia	12106	128	1694	17.9111	10	0.558312	0.51806	0.989263	ENSG00000135245,ENSG00000148926,ENSG00000221869,ENSG00000124762,ENSG00000120156,ENSG00000103175,ENSG00000080709,ENSG00000125810,ENSG00000128016,ENSG00000159216
M48	Astrocyte	12106	90	1714	12.7424	3	0.235434	0.207698	0.999871	ENSG00000073060,ENSG00000068903,ENSG00000130811
M48	Microglia	12106	90	1566	11.6422	9	0.773052	0.746395	0.839367	ENSG00000163376,ENSG00000106772,ENSG00000147202,ENSG00000149357,ENSG00000060558,ENSG00000114450,ENSG00000068903,ENSG00000189319,ENSG00000167977
M48	Oligodendrocyte	12106	90	2211	16.4373	19	1.15591	1.19929	0.279595	ENSG00000114019,ENSG00000135636,ENSG00000010292,ENSG00000115896,ENSG00000174307,ENSG00000185950,ENSG00000165338,ENSG00000073060,ENSG00000143799,ENSG00000106772,ENSG00000167118,ENSG00000149357,ENSG00000139428,ENSG00000172780,ENSG00000162073,ENSG00000162923,ENSG00000114450,ENSG00000068903,ENSG00000175155
M48	Neuron	12106	90	5889	43.7808	37	0.84512	0.735354	0.938764	ENSG00000164402,ENSG00000117408,ENSG00000115896,ENSG00000174307,ENSG00000185950,ENSG00000166169,ENSG00000165338,ENSG00000073060,ENSG00000180098,ENSG00000143799,ENSG00000084774,ENSG00000168758,ENSG00000112964,ENSG00000106772,ENSG00000169180,ENSG00000103184,ENSG00000147202,ENSG00000086758,ENSG00000161011,ENSG00000198382,ENSG00000198909,ENSG00000117480,ENSG00000116685,ENSG00000149357,ENSG00000085998…
M48	Endothelia	12106	90	1694	12.5938	8	0.635235	0.597771	0.947383	ENSG00000135636,ENSG00000107816,ENSG00000166169,ENSG00000073060,ENSG00000147202,ENSG00000198909,ENSG00000168350,ENSG00000068903
M49	Astrocyte	12106	95	1714	13.4504	11	0.817822	0.792649	0.806156	ENSG00000117594,ENSG00000117318,ENSG00000163902,ENSG00000113742,ENSG00000178952,ENSG00000104679,ENSG00000165312,ENSG00000132128,ENSG00000112981,ENSG00000135390,ENSG00000124212
M49	Microglia	12106	95	1566	12.2889	7	0.569618	0.533319	0.97029	ENSG00000196220,ENSG00000043462,ENSG00000152910,ENSG00000177679,ENSG00000165312,ENSG00000131791,ENSG00000127328
M49	Oligodendrocyte	12106	95	2211	17.3505	8	0.461082	0.409408	0.997879	ENSG00000152910,ENSG00000177679,ENSG00000143228,ENSG00000079616,ENSG00000130005,ENSG00000167377,ENSG00000135390,ENSG00000136463
M49	Neuron	12106	95	5889	46.213	39	0.843918	0.733473	0.944424	ENSG00000196220,ENSG00000117318,ENSG00000013619,ENSG00000102103,ENSG00000152910,ENSG00000163902,ENSG00000060688,ENSG00000166938,ENSG00000113742,ENSG00000146776,ENSG00000155034,ENSG00000177679,ENSG00000138036,ENSG00000084090,ENSG00000145494,ENSG00000100938,ENSG00000104679,ENSG00000105953,ENSG00000165312,ENSG00000198863,ENSG00000143228,ENSG00000131791,ENSG00000132128,ENSG00000113593,ENSG00000082146…
M49	Endothelia	12106	95	1694	13.2934	7	0.526577	0.486821	0.984795	ENSG00000117594,ENSG00000117318,ENSG00000163902,ENSG00000104679,ENSG00000142910,ENSG00000135390,ENSG00000124212
M51	Astrocyte	12106	118	1714	16.7068	8	0.478848	0.438346	0.996083	ENSG00000175550,ENSG00000140990,ENSG00000126432,ENSG00000178878,ENSG00000104886,ENSG00000100216,ENSG00000100097,ENSG00000015475
M51	Microglia	12106	118	1566	15.2642	7	0.45859	0.421884	0.995923	ENSG00000126432,ENSG00000131370,ENSG00000163162,ENSG00000007376,ENSG00000064601,ENSG00000100997,ENSG00000015475
M51	Oligodendrocyte	12106	118	2211	21.5511	7	0.324809	0.279967	0.999977	ENSG00000163162,ENSG00000060718,ENSG00000079931,ENSG00000178878,ENSG00000100097,ENSG00000105518,ENSG00000139618
M51	Neuron	12106	118	5889	57.4015	39	0.679425	0.518004	0.999797	ENSG00000106682,ENSG00000151500,ENSG00000175550,ENSG00000125356,ENSG00000054116,ENSG00000110717,ENSG00000178982,ENSG00000197150,ENSG00000172046,ENSG00000167779,ENSG00000143612,ENSG00000148331,ENSG00000159692,ENSG00000130312,ENSG00000163162,ENSG00000141582,ENSG00000269190,ENSG00000142669,ENSG00000119723,ENSG00000171703,ENSG00000148426,ENSG00000060718,ENSG00000163602,ENSG00000198498,ENSG00000141026…
M51	Endothelia	12106	118	1694	16.5118	5	0.302814	0.269827	0.99988	ENSG00000126432,ENSG00000178878,ENSG00000197859,ENSG00000173991,ENSG00000132388
M54	Astrocyte	12106	51	1714	7.22072	5	0.692452	0.658046	0.866536	ENSG00000157593,ENSG00000177556,ENSG00000140557,ENSG00000126457,ENSG00000150893
M54	Microglia	12106	51	1566	6.59722	4	0.606316	0.571739	0.910691	ENSG00000163719,ENSG00000026652,ENSG00000151117,ENSG00000126457
M54	Oligodendrocyte	12106	51	2211	9.31447	6	0.644159	0.595642	0.923979	ENSG00000135083,ENSG00000134690,ENSG00000026652,ENSG00000123159,ENSG00000151117,ENSG00000140557
M54	Neuron	12106	51	5889	24.8091	11	0.443386	0.289036	0.999984	ENSG00000013306,ENSG00000026652,ENSG00000177556,ENSG00000137133,ENSG00000122585,ENSG00000170265,ENSG00000176978,ENSG00000135776,ENSG00000172354,ENSG00000140557,ENSG00000126457
M54	Endothelia	12106	51	1694	7.13646	3	0.420376	0.383078	0.98045	ENSG00000122585,ENSG00000140557,ENSG00000126457
M56	Astrocyte	12106	53	1714	7.50388	4	0.533057	0.493782	0.953691	ENSG00000177283,ENSG00000119283,ENSG00000090581,ENSG00000136114
M56	Microglia	12106	53	1566	6.85594	2	0.291718	0.263018	0.994322	ENSG00000109667,ENSG00000160883
M56	Oligodendrocyte	12106	53	2211	9.67975	1	0.103309	0.0856587	0.999978	ENSG00000180198
M56	Neuron	12106	53	5889	25.782	23	0.892095	0.808636	0.816849	ENSG00000106052,ENSG00000119772,ENSG00000181873,ENSG00000146021,ENSG00000112139,ENSG00000063761,ENSG00000168096,ENSG00000132768,ENSG00000102870,ENSG00000080603,ENSG00000160949,ENSG00000164985,ENSG00000119283,ENSG00000175482,ENSG00000139354,ENSG00000104936,ENSG00000160883,ENSG00000099992,ENSG00000007516,ENSG00000102030,ENSG00000185504,ENSG00000140326,ENSG00000136490
M56	Endothelia	12106	53	1694	7.41632	3	0.404513	0.367685	0.984529	ENSG00000096433,ENSG00000157110,ENSG00000119283
M60	Astrocyte	12106	142	1714	20.1047	28	1.39271	1.49722	0.0410421	ENSG00000131951,ENSG00000176601,ENSG00000111834,ENSG00000160838,ENSG00000137098,ENSG00000198774,ENSG00000004838,ENSG00000158163,ENSG00000178125,ENSG00000167858,ENSG00000157856,ENSG00000164675,ENSG00000138400,ENSG00000215217,ENSG00000064199,ENSG00000138587,ENSG00000150773,ENSG00000144061,ENSG00000188931,ENSG00000185250,ENSG00000162543,ENSG00000186352,ENSG00000183098,ENSG00000164105,ENSG00000087903…
M60	Microglia	12106	142	1566	18.3687	10	0.544403	0.506762	0.991613	ENSG00000158163,ENSG00000186952,ENSG00000064012,ENSG00000002587,ENSG00000222009,ENSG00000115350,ENSG00000183098,ENSG00000087903,ENSG00000025708,ENSG00000213741
M60	Oligodendrocyte	12106	142	2211	25.9344	9	0.347029	0.300012	0.999991	ENSG00000138587,ENSG00000186952,ENSG00000162542,ENSG00000002587,ENSG00000182378,ENSG00000183098,ENSG00000146555,ENSG00000131018,ENSG00000182667
M60	Neuron	12106	142	5889	69.0763	37	0.535639	0.368037	1	ENSG00000104218,ENSG00000188316,ENSG00000164953,ENSG00000039139,ENSG00000106992,ENSG00000115423,ENSG00000163349,ENSG00000135046,ENSG00000215217,ENSG00000110723,ENSG00000186952,ENSG00000206530,ENSG00000205084,ENSG00000100650,ENSG00000115339,ENSG00000185250,ENSG00000140795,ENSG00000157796,ENSG00000057019,ENSG00000007062,ENSG00000002587,ENSG00000135632,ENSG00000250305,ENSG00000143156,ENSG00000112419…
M60	Endothelia	12106	142	1694	19.8701	11	0.553594	0.512971	0.992622	ENSG00000198774,ENSG00000185250,ENSG00000007062,ENSG00000186352,ENSG00000183098,ENSG00000164105,ENSG00000087903,ENSG00000182667,ENSG00000139926,ENSG00000075131,ENSG00000213741
M61	Astrocyte	12106	51	1714	7.22072	7	0.969433	0.964424	0.59655	ENSG00000175267,ENSG00000129295,ENSG00000172426,ENSG00000163482,ENSG00000101222,ENSG00000179029,ENSG00000004776
M61	Microglia	12106	51	1566	6.59722	5	0.757894	0.730736	0.806714	ENSG00000142609,ENSG00000107186,ENSG00000172613,ENSG00000175764,ENSG00000179029
M61	Oligodendrocyte	12106	51	2211	9.31447	1	0.10736	0.0891031	0.999967	ENSG00000163873
M61	Neuron	12106	51	5889	24.8091	19	0.765848	0.625639	0.962487	ENSG00000181652,ENSG00000130635,ENSG00000156510,ENSG00000103021,ENSG00000114631,ENSG00000172426,ENSG00000172613,ENSG00000161996,ENSG00000175764,ENSG00000163873,ENSG00000173442,ENSG00000185261,ENSG00000163482,ENSG00000148814,ENSG00000177519,ENSG00000166073,ENSG00000169683,ENSG00000182446,ENSG00000160551
M61	Endothelia	12106	51	1694	7.13646	2	0.280251	0.250005	0.995793	ENSG00000177519,ENSG00000204536
M62	Astrocyte	12106	66	1714	9.34446	12	1.28418	1.34975	0.217346	ENSG00000133640,ENSG00000185860,ENSG00000151575,ENSG00000133067,ENSG00000000003,ENSG00000118965,ENSG00000177425,ENSG00000054179,ENSG00000066032,ENSG00000131044,ENSG00000160188,ENSG00000127329
M62	Microglia	12106	66	1566	8.53758	5	0.585646	0.550269	0.940618	ENSG00000008226,ENSG00000198589,ENSG00000187240,ENSG00000179299,ENSG00000184898
M62	Oligodendrocyte	12106	66	2211	12.054	4	0.331839	0.287461	0.998974	ENSG00000151023,ENSG00000090889,ENSG00000066032,ENSG00000127329
M62	Neuron	12106	66	5889	32.1059	15	0.467204	0.308791	0.999996	ENSG00000187240,ENSG00000121769,ENSG00000107611,ENSG00000106683,ENSG00000146374,ENSG00000184898,ENSG00000015133,ENSG00000066032,ENSG00000106348,ENSG00000143093,ENSG00000136279,ENSG00000167103,ENSG00000129355,ENSG00000178773,ENSG00000127329
M62	Endothelia	12106	66	1694	9.23542	5	0.541394	0.502358	0.963551	ENSG00000185860,ENSG00000133067,ENSG00000054179,ENSG00000066032,ENSG00000127329
M63	Astrocyte	12106	105	1714	14.8662	18	1.2108	1.25708	0.224932	ENSG00000114473,ENSG00000114670,ENSG00000119703,ENSG00000088727,ENSG00000166578,ENSG00000165115,ENSG00000010626,ENSG00000135951,ENSG00000185989,ENSG00000107249,ENSG00000159713,ENSG00000054654,ENSG00000173208,ENSG00000163083,ENSG00000116885,ENSG00000163132,ENSG00000158062,ENSG00000141522
M63	Microglia	12106	105	1566	13.5825	3	0.220872	0.196432	0.999937	ENSG00000184500,ENSG00000189431,ENSG00000183578
M63	Oligodendrocyte	12106	105	2211	19.1769	7	0.365023	0.317525	0.999837	ENSG00000112319,ENSG00000138193,ENSG00000159713,ENSG00000054654,ENSG00000152127,ENSG00000160050,ENSG00000165084
M63	Neuron	12106	105	5889	51.0776	38	0.743967	0.596175	0.996331	ENSG00000096093,ENSG00000112319,ENSG00000163297,ENSG00000182718,ENSG00000058453,ENSG00000135951,ENSG00000147400,ENSG00000185989,ENSG00000107249,ENSG00000204104,ENSG00000183317,ENSG00000120733,ENSG00000175792,ENSG00000236279,ENSG00000173208,ENSG00000183091,ENSG00000154781,ENSG00000115677,ENSG00000091879,ENSG00000124789,ENSG00000158062,ENSG00000110076,ENSG00000152127,ENSG00000014216,ENSG00000128581…
M63	Endothelia	12106	105	1694	14.6927	10	0.680609	0.644914	0.935223	ENSG00000164294,ENSG00000182718,ENSG00000138193,ENSG00000107249,ENSG00000159713,ENSG00000054654,ENSG00000244607,ENSG00000173208,ENSG00000091879,ENSG00000175183
M70	Astrocyte	12106	399	1714	56.4915	60	1.06211	1.07576	0.325499	ENSG00000136960,ENSG00000126803,ENSG00000166086,ENSG00000164161,ENSG00000028116,ENSG00000135905,ENSG00000139737,ENSG00000146122,ENSG00000183230,ENSG00000012171,ENSG00000047365,ENSG00000173786,ENSG00000173327,ENSG00000126878,ENSG00000250722,ENSG00000143995,ENSG00000086205,ENSG00000160781,ENSG00000184005,ENSG00000140479,ENSG00000010278,ENSG00000118322,ENSG00000163697,ENSG00000169554,ENSG00000128805…
M70	Microglia	12106	399	1566	51.6136	98	1.89873	2.27067	1.03199e-10	ENSG00000114541,ENSG00000091513,ENSG00000136960,ENSG00000168297,ENSG00000011426,ENSG00000065809,ENSG00000124920,ENSG00000198121,ENSG00000013297,ENSG00000174607,ENSG00000075651,ENSG00000164124,ENSG00000184144,ENSG00000169247,ENSG00000150867,ENSG00000197892,ENSG00000112893,ENSG00000070214,ENSG00000204655,ENSG00000164161,ENSG00000172508,ENSG00000172005,ENSG00000158859,ENSG00000075539,ENSG00000005893…
M70	Oligodendrocyte	12106	399	2211	72.872	207	2.8406	5.21916	5.74689e-54	ENSG00000196187,ENSG00000114541,ENSG00000168314,ENSG00000065361,ENSG00000091513,ENSG00000136960,ENSG00000143418,ENSG00000205116,ENSG00000170775,ENSG00000123560,ENSG00000168297,ENSG00000126803,ENSG00000136541,ENSG00000011426,ENSG00000065809,ENSG00000147488,ENSG00000124920,ENSG00000198121,ENSG00000013297,ENSG00000183111,ENSG00000166086,ENSG00000174607,ENSG00000075651,ENSG00000139433,ENSG00000164124…
M70	Neuron	12106	399	5889	194.095	188	0.968599	0.938645	0.749016	ENSG00000065361,ENSG00000136960,ENSG00000143418,ENSG00000170775,ENSG00000168297,ENSG00000136541,ENSG00000011426,ENSG00000065809,ENSG00000147488,ENSG00000198121,ENSG00000013297,ENSG00000166086,ENSG00000174607,ENSG00000075651,ENSG00000139433,ENSG00000184144,ENSG00000150867,ENSG00000112893,ENSG00000070214,ENSG00000204655,ENSG00000172508,ENSG00000066322,ENSG00000172005,ENSG00000075539,ENSG00000165476…
M70	Endothelia	12106	399	1694	55.8323	75	1.34331	1.44231	0.00406116	ENSG00000205116,ENSG00000123560,ENSG00000136541,ENSG00000065809,ENSG00000166086,ENSG00000174607,ENSG00000169504,ENSG00000112893,ENSG00000164161,ENSG00000028116,ENSG00000135905,ENSG00000139737,ENSG00000146122,ENSG00000183230,ENSG00000197430,ENSG00000012171,ENSG00000047365,ENSG00000173327,ENSG00000126878,ENSG00000250722,ENSG00000152689,ENSG00000179178,ENSG00000086205,ENSG00000160781,ENSG00000184005…
M71	Astrocyte	12106	54	1714	7.64547	10	1.30796	1.38013	0.22725	ENSG00000115808,ENSG00000074201,ENSG00000156482,ENSG00000114942,ENSG00000130227,ENSG00000198369,ENSG00000145734,ENSG00000115128,ENSG00000198964,ENSG00000141127
M71	Microglia	12106	54	1566	6.9853	9	1.28842	1.34807	0.258972	ENSG00000151726,ENSG00000080822,ENSG00000064651,ENSG00000156482,ENSG00000179388,ENSG00000114942,ENSG00000117450,ENSG00000136940,ENSG00000186417
M71	Oligodendrocyte	12106	54	2211	9.86238	12	1.21674	1.28016	0.273446	ENSG00000175305,ENSG00000080822,ENSG00000077380,ENSG00000115808,ENSG00000064651,ENSG00000036549,ENSG00000031691,ENSG00000117450,ENSG00000140526,ENSG00000186417,ENSG00000159200,ENSG00000177156
M71	Neuron	12106	54	5889	26.2685	25	0.951712	0.909725	0.684754	ENSG00000151726,ENSG00000080822,ENSG00000077380,ENSG00000171492,ENSG00000115808,ENSG00000073921,ENSG00000064651,ENSG00000156482,ENSG00000036549,ENSG00000179388,ENSG00000114942,ENSG00000103264,ENSG00000130227,ENSG00000198369,ENSG00000145734,ENSG00000140526,ENSG00000198964,ENSG00000019485,ENSG00000186417,ENSG00000168807,ENSG00000159200,ENSG00000177156,ENSG00000197063,ENSG00000017427,ENSG00000125503
M71	Endothelia	12106	54	1694	7.55625	10	1.32341	1.39922	0.216413	ENSG00000151726,ENSG00000080822,ENSG00000115808,ENSG00000156482,ENSG00000117450,ENSG00000130227,ENSG00000198369,ENSG00000140526,ENSG00000198964,ENSG00000141127
M82	Astrocyte	12106	152	1714	21.5206	28	1.30108	1.37515	0.0840913	ENSG00000109738,ENSG00000169933,ENSG00000092820,ENSG00000161203,ENSG00000181449,ENSG00000110693,ENSG00000152779,ENSG00000137693,ENSG00000186153,ENSG00000127561,ENSG00000007372,ENSG00000134376,ENSG00000133805,ENSG00000162630,ENSG00000111674,ENSG00000008277,ENSG00000118515,ENSG00000078114,ENSG00000149292,ENSG00000137474,ENSG00000120942,ENSG00000151320,ENSG00000187486,ENSG00000092096,ENSG00000188039…
M82	Microglia	12106	152	1566	19.6623	18	0.915457	0.902972	0.692918	ENSG00000119397,ENSG00000188191,ENSG00000169933,ENSG00000102003,ENSG00000177570,ENSG00000139970,ENSG00000110693,ENSG00000187189,ENSG00000240694,ENSG00000134376,ENSG00000111674,ENSG00000118515,ENSG00000015285,ENSG00000172530,ENSG00000196782,ENSG00000137474,ENSG00000151320,ENSG00000102886
M82	Oligodendrocyte	12106	152	2211	27.7608	29	1.04464	1.0559	0.429605	ENSG00000119397,ENSG00000188191,ENSG00000169933,ENSG00000102003,ENSG00000177570,ENSG00000139970,ENSG00000110693,ENSG00000145242,ENSG00000034053,ENSG00000127561,ENSG00000240694,ENSG00000134376,ENSG00000160326,ENSG00000144909,ENSG00000111674,ENSG00000118515,ENSG00000015285,ENSG00000166224,ENSG00000078114,ENSG00000133597,ENSG00000196782,ENSG00000104728,ENSG00000151320,ENSG00000168993,ENSG00000122863…
M82	Neuron	12106	152	5889	73.9409	90	1.21719	1.54066	0.00547203	ENSG00000109738,ENSG00000188191,ENSG00000168769,ENSG00000169933,ENSG00000109436,ENSG00000085433,ENSG00000102003,ENSG00000162636,ENSG00000075945,ENSG00000092820,ENSG00000103034,ENSG00000120265,ENSG00000166111,ENSG00000158560,ENSG00000083720,ENSG00000177570,ENSG00000139970,ENSG00000110693,ENSG00000015676,ENSG00000145242,ENSG00000187189,ENSG00000044459,ENSG00000096872,ENSG00000186153,ENSG00000127561…
M82	Endothelia	12106	152	1694	21.2695	28	1.31644	1.39437	0.0750181	ENSG00000109738,ENSG00000092820,ENSG00000158560,ENSG00000177570,ENSG00000181449,ENSG00000110693,ENSG00000137693,ENSG00000186153,ENSG00000127561,ENSG00000007372,ENSG00000134376,ENSG00000113575,ENSG00000162630,ENSG00000111674,ENSG00000118515,ENSG00000078114,ENSG00000213928,ENSG00000196782,ENSG00000137474,ENSG00000120942,ENSG00000151320,ENSG00000187486,ENSG00000092096,ENSG00000188039,ENSG00000099875…
M85	Astrocyte	12106	188	1714	26.6175	14	0.525969	0.483635	0.998568	ENSG00000127824,ENSG00000108395,ENSG00000213190,ENSG00000152932,ENSG00000018236,ENSG00000169764,ENSG00000070087,ENSG00000148219,ENSG00000075884,ENSG00000132613,ENSG00000116151,ENSG00000096746,ENSG00000042286,ENSG00000107643
M85	Microglia	12106	188	1566	24.3192	23	0.945756	0.937268	0.646508	ENSG00000172292,ENSG00000116675,ENSG00000186310,ENSG00000164924,ENSG00000125814,ENSG00000106299,ENSG00000114115,ENSG00000173846,ENSG00000172348,ENSG00000107745,ENSG00000111052,ENSG00000011304,ENSG00000070087,ENSG00000113070,ENSG00000075884,ENSG00000103496,ENSG00000253719,ENSG00000143079,ENSG00000106723,ENSG00000266094,ENSG00000137193,ENSG00000105321,ENSG00000180530
M85	Oligodendrocyte	12106	188	2211	34.3357	35	1.01935	1.02416	0.479745	ENSG00000172292,ENSG00000169891,ENSG00000040341,ENSG00000116675,ENSG00000114279,ENSG00000186310,ENSG00000108395,ENSG00000105887,ENSG00000152932,ENSG00000114115,ENSG00000104381,ENSG00000177565,ENSG00000172348,ENSG00000018236,ENSG00000111052,ENSG00000070087,ENSG00000004961,ENSG00000025800,ENSG00000119403,ENSG00000130449,ENSG00000148219,ENSG00000106443,ENSG00000103496,ENSG00000151136,ENSG00000145725…
M85	Neuron	12106	188	5889	91.4532	110	1.2028	1.49805	0.00394095	ENSG00000065559,ENSG00000114573,ENSG00000169139,ENSG00000172292,ENSG00000144834,ENSG00000169891,ENSG00000086300,ENSG00000115419,ENSG00000040341,ENSG00000131507,ENSG00000116675,ENSG00000114279,ENSG00000213760,ENSG00000142686,ENSG00000186310,ENSG00000127824,ENSG00000108395,ENSG00000164924,ENSG00000112640,ENSG00000158417,ENSG00000253368,ENSG00000125814,ENSG00000106299,ENSG00000105887,ENSG00000175073…
M85	Endothelia	12106	188	1694	26.307	18	0.68423	0.647066	0.973844	ENSG00000131507,ENSG00000127824,ENSG00000108395,ENSG00000065526,ENSG00000152932,ENSG00000114115,ENSG00000107745,ENSG00000011304,ENSG00000070087,ENSG00000196924,ENSG00000075884,ENSG00000132613,ENSG00000172922,ENSG00000091262,ENSG00000107643,ENSG00000154734,ENSG00000024422,ENSG00000171105
M86	Astrocyte	12106	146	1714	20.6711	27	1.30617	1.38161	0.0852846	ENSG00000067715,ENSG00000133318,ENSG00000134121,ENSG00000120251,ENSG00000091129,ENSG00000101144,ENSG00000154096,ENSG00000163884,ENSG00000187091,ENSG00000133083,ENSG00000111275,ENSG00000021645,ENSG00000162687,ENSG00000105784,ENSG00000111554,ENSG00000110651,ENSG00000106688,ENSG00000156475,ENSG00000147576,ENSG00000215251,ENSG00000170419,ENSG00000131558,ENSG00000171867,ENSG00000108848,ENSG00000124299…
M86	Microglia	12106	146	1566	18.8862	18	0.953078	0.945855	0.624343	ENSG00000136531,ENSG00000178662,ENSG00000261115,ENSG00000187091,ENSG00000040731,ENSG00000173258,ENSG00000133083,ENSG00000160932,ENSG00000109320,ENSG00000089820,ENSG00000110651,ENSG00000171163,ENSG00000101040,ENSG00000177511,ENSG00000171867,ENSG00000165973,ENSG00000124422,ENSG00000167994
M86	Oligodendrocyte	12106	146	2211	26.665	42	1.5751	1.82287	0.00120268	ENSG00000136531,ENSG00000067715,ENSG00000133318,ENSG00000134121,ENSG00000120251,ENSG00000091129,ENSG00000050748,ENSG00000159164,ENSG00000130540,ENSG00000178662,ENSG00000154096,ENSG00000113327,ENSG00000033627,ENSG00000261115,ENSG00000040731,ENSG00000173258,ENSG00000156642,ENSG00000021645,ENSG00000168916,ENSG00000184408,ENSG00000156687,ENSG00000145495,ENSG00000162687,ENSG00000185736,ENSG00000132718…
M86	Neuron	12106	146	5889	71.0221	102	1.43617	2.47264	1.43061e-07	ENSG00000136531,ENSG00000067715,ENSG00000133318,ENSG00000134121,ENSG00000120251,ENSG00000144959,ENSG00000091129,ENSG00000050748,ENSG00000214517,ENSG00000155744,ENSG00000159164,ENSG00000156515,ENSG00000131437,ENSG00000130540,ENSG00000178662,ENSG00000154096,ENSG00000113327,ENSG00000033627,ENSG00000100813,ENSG00000196715,ENSG00000261115,ENSG00000091972,ENSG00000173511,ENSG00000186377,ENSG00000040731…
M86	Endothelia	12106	146	1694	20.4299	32	1.56633	1.73917	0.00585073	ENSG00000067715,ENSG00000133318,ENSG00000134121,ENSG00000120251,ENSG00000091129,ENSG00000101144,ENSG00000131437,ENSG00000130540,ENSG00000100813,ENSG00000163884,ENSG00000261115,ENSG00000187091,ENSG00000133083,ENSG00000111275,ENSG00000156642,ENSG00000168916,ENSG00000160932,ENSG00000172493,ENSG00000156687,ENSG00000162687,ENSG00000132718,ENSG00000105784,ENSG00000110651,ENSG00000174326,ENSG00000106688…
M98	Astrocyte	12106	114	1714	16.1404	20	1.23912	1.29339	0.180523	ENSG00000117114,ENSG00000109339,ENSG00000156113,ENSG00000144468,ENSG00000240184,ENSG00000135472,ENSG00000144285,ENSG00000176749,ENSG00000106278,ENSG00000188338,ENSG00000129562,ENSG00000147604,ENSG00000155903,ENSG00000145741,ENSG00000160606,ENSG00000163702,ENSG00000196090,ENSG00000088826,ENSG00000131469,ENSG00000204347
M98	Microglia	12106	114	1566	14.7467	27	1.83091	2.10773	0.00115323	ENSG00000171132,ENSG00000133019,ENSG00000164588,ENSG00000117114,ENSG00000115977,ENSG00000136854,ENSG00000197969,ENSG00000186472,ENSG00000156113,ENSG00000240184,ENSG00000121871,ENSG00000158006,ENSG00000169372,ENSG00000176749,ENSG00000165209,ENSG00000198846,ENSG00000065911,ENSG00000186094,ENSG00000184349,ENSG00000165300,ENSG00000187416,ENSG00000196090,ENSG00000196876,ENSG00000276231,ENSG00000142534…
M98	Oligodendrocyte	12106	114	2211	20.8206	29	1.39285	1.53382	0.0345451	ENSG00000171132,ENSG00000164588,ENSG00000047410,ENSG00000075340,ENSG00000144406,ENSG00000109339,ENSG00000186472,ENSG00000156113,ENSG00000011083,ENSG00000153140,ENSG00000144285,ENSG00000106278,ENSG00000188338,ENSG00000147604,ENSG00000198846,ENSG00000160606,ENSG00000169641,ENSG00000112029,ENSG00000133104,ENSG00000187416,ENSG00000163918,ENSG00000196090,ENSG00000196876,ENSG00000054793,ENSG00000132646…
M98	Neuron	12106	114	5889	55.4556	70	1.26227	1.68761	0.00401667	ENSG00000171132,ENSG00000106976,ENSG00000133019,ENSG00000164588,ENSG00000117114,ENSG00000115977,ENSG00000136854,ENSG00000075340,ENSG00000197969,ENSG00000153558,ENSG00000144406,ENSG00000109339,ENSG00000186472,ENSG00000156113,ENSG00000135164,ENSG00000136518,ENSG00000135503,ENSG00000001167,ENSG00000011083,ENSG00000153140,ENSG00000176095,ENSG00000170759,ENSG00000112218,ENSG00000003147,ENSG00000169372…
M98	Endothelia	12106	114	1694	15.9521	19	1.19107	1.23185	0.239507	ENSG00000171132,ENSG00000106976,ENSG00000133019,ENSG00000117114,ENSG00000109339,ENSG00000170759,ENSG00000135472,ENSG00000144285,ENSG00000176749,ENSG00000106278,ENSG00000188338,ENSG00000165209,ENSG00000145198,ENSG00000160606,ENSG00000169641,ENSG00000088826,ENSG00000276231,ENSG00000131469,ENSG00000204347
M99	Astrocyte	12106	53	1714	7.50388	6	0.799586	0.773223	0.780331	ENSG00000171617,ENSG00000185352,ENSG00000152578,ENSG00000154975,ENSG00000244754,ENSG00000167173
M99	Microglia	12106	53	1566	6.85594	9	1.31273	1.37883	0.241309	ENSG00000171617,ENSG00000166006,ENSG00000185352,ENSG00000169271,ENSG00000152578,ENSG00000009790,ENSG00000107242,ENSG00000213390,ENSG00000167173
M99	Oligodendrocyte	12106	53	2211	9.67975	14	1.44632	1.61033	0.0906709	ENSG00000166006,ENSG00000114439,ENSG00000118971,ENSG00000165185,ENSG00000185352,ENSG00000116497,ENSG00000163644,ENSG00000246705,ENSG00000139998,ENSG00000152578,ENSG00000058335,ENSG00000186318,ENSG00000147571,ENSG00000154975
M99	Neuron	12106	53	5889	25.782	22	0.853308	0.748284	0.881108	ENSG00000116106,ENSG00000171617,ENSG00000166006,ENSG00000172209,ENSG00000044446,ENSG00000188674,ENSG00000185352,ENSG00000116497,ENSG00000154478,ENSG00000163644,ENSG00000077044,ENSG00000139998,ENSG00000152578,ENSG00000058335,ENSG00000052841,ENSG00000157851,ENSG00000187742,ENSG00000186318,ENSG00000147571,ENSG00000174373,ENSG00000154975,ENSG00000182541
M99	Endothelia	12106	53	1694	7.41632	7	0.943864	0.935047	0.625725	ENSG00000171617,ENSG00000165185,ENSG00000185352,ENSG00000151929,ENSG00000152578,ENSG00000244754,ENSG00000167173
M101	Astrocyte	12106	84	1714	11.8929	9	0.756751	0.726141	0.858473	ENSG00000108797,ENSG00000143761,ENSG00000124140,ENSG00000166448,ENSG00000150687,ENSG00000169228,ENSG00000139514,ENSG00000151150,ENSG00000179431
M101	Microglia	12106	84	1566	10.866	11	1.01233	1.01429	0.531652	ENSG00000102226,ENSG00000198794,ENSG00000174938,ENSG00000184524,ENSG00000197580,ENSG00000155093,ENSG00000134109,ENSG00000060656,ENSG00000151150,ENSG00000100321,ENSG00000181026
M101	Oligodendrocyte	12106	84	2211	15.3415	18	1.17329	1.22234	0.264349	ENSG00000102226,ENSG00000157064,ENSG00000198794,ENSG00000174938,ENSG00000073910,ENSG00000124140,ENSG00000186868,ENSG00000167654,ENSG00000170921,ENSG00000166448,ENSG00000150593,ENSG00000176402,ENSG00000076003,ENSG00000155093,ENSG00000151150,ENSG00000100321,ENSG00000105696,ENSG00000196961
M101	Neuron	12106	84	5889	40.8621	55	1.34599	2.0115	0.00133465	ENSG00000102226,ENSG00000157064,ENSG00000204851,ENSG00000108797,ENSG00000067842,ENSG00000198794,ENSG00000198910,ENSG00000174938,ENSG00000174996,ENSG00000105649,ENSG00000143761,ENSG00000073910,ENSG00000124140,ENSG00000177380,ENSG00000186868,ENSG00000132589,ENSG00000161682,ENSG00000175931,ENSG00000167654,ENSG00000146376,ENSG00000170921,ENSG00000166448,ENSG00000138834,ENSG00000184524,ENSG00000105223…
M101	Endothelia	12106	84	1694	11.7542	10	0.850762	0.829601	0.755651	ENSG00000108797,ENSG00000073910,ENSG00000124140,ENSG00000166448,ENSG00000150687,ENSG00000182963,ENSG00000169228,ENSG00000139514,ENSG00000179431,ENSG00000130751
M105	Astrocyte	12106	150	1714	21.2374	28	1.31843	1.39797	0.0737053	ENSG00000181722,ENSG00000145675,ENSG00000123352,ENSG00000109756,ENSG00000162909,ENSG00000107779,ENSG00000173706,ENSG00000066027,ENSG00000078549,ENSG00000169860,ENSG00000164904,ENSG00000136297,ENSG00000116729,ENSG00000175287,ENSG00000164741,ENSG00000182175,ENSG00000105852,ENSG00000198963,ENSG00000125246,ENSG00000003137,ENSG00000177108,ENSG00000141756,ENSG00000132386,ENSG00000056487,ENSG00000103740…
M105	Microglia	12106	150	1566	19.4036	29	1.49457	1.62458	0.0165089	ENSG00000172260,ENSG00000218336,ENSG00000184613,ENSG00000197535,ENSG00000064393,ENSG00000067141,ENSG00000203879,ENSG00000196865,ENSG00000173320,ENSG00000198626,ENSG00000102468,ENSG00000175497,ENSG00000136297,ENSG00000157445,ENSG00000103449,ENSG00000182901,ENSG00000176171,ENSG00000172936,ENSG00000164741,ENSG00000198729,ENSG00000105852,ENSG00000185518,ENSG00000198963,ENSG00000013583,ENSG00000134955…
M105	Oligodendrocyte	12106	150	2211	27.3955	37	1.35059	1.47325	0.029721	ENSG00000172260,ENSG00000163947,ENSG00000218336,ENSG00000028528,ENSG00000181722,ENSG00000139174,ENSG00000164619,ENSG00000079308,ENSG00000145675,ENSG00000074590,ENSG00000197535,ENSG00000064393,ENSG00000198625,ENSG00000113810,ENSG00000153956,ENSG00000182372,ENSG00000203879,ENSG00000198626,ENSG00000116560,ENSG00000175497,ENSG00000157445,ENSG00000136938,ENSG00000171681,ENSG00000182901,ENSG00000175287…
M105	Neuron	12106	150	5889	72.9679	83	1.13749	1.31217	0.0585499	ENSG00000143164,ENSG00000172260,ENSG00000107758,ENSG00000008086,ENSG00000218336,ENSG00000184613,ENSG00000181722,ENSG00000139174,ENSG00000164619,ENSG00000110514,ENSG00000145675,ENSG00000164112,ENSG00000123352,ENSG00000088538,ENSG00000074590,ENSG00000109756,ENSG00000215218,ENSG00000050405,ENSG00000102471,ENSG00000101871,ENSG00000197535,ENSG00000064393,ENSG00000155363,ENSG00000162909,ENSG00000121310…
M105	Endothelia	12106	150	1694	20.9896	28	1.33399	1.4175	0.0655487	ENSG00000107758,ENSG00000181722,ENSG00000079308,ENSG00000145675,ENSG00000123352,ENSG00000109756,ENSG00000064393,ENSG00000173706,ENSG00000132688,ENSG00000182372,ENSG00000066027,ENSG00000078549,ENSG00000164904,ENSG00000136297,ENSG00000118292,ENSG00000116729,ENSG00000164741,ENSG00000182175,ENSG00000105852,ENSG00000198963,ENSG00000177108,ENSG00000141756,ENSG00000078804,ENSG00000132386,ENSG00000139220…
M106	Astrocyte	12106	202	1714	28.5997	26	0.9091	0.894102	0.731195	ENSG00000106537,ENSG00000003402,ENSG00000135298,ENSG00000083896,ENSG00000117632,ENSG00000115380,ENSG00000185305,ENSG00000146223,ENSG00000145779,ENSG00000158769,ENSG00000127863,ENSG00000129219,ENSG00000177875,ENSG00000136895,ENSG00000162390,ENSG00000155096,ENSG00000111450,ENSG00000183580,ENSG00000104313,ENSG00000076641,ENSG00000197208,ENSG00000233276,ENSG00000147099,ENSG00000132470,ENSG00000197496…
M106	Microglia	12106	202	1566	26.1302	29	1.10983	1.13062	0.301603	ENSG00000163032,ENSG00000196950,ENSG00000185900,ENSG00000144290,ENSG00000164830,ENSG00000022355,ENSG00000175567,ENSG00000144619,ENSG00000184611,ENSG00000110047,ENSG00000180440,ENSG00000185305,ENSG00000115107,ENSG00000196277,ENSG00000149972,ENSG00000171940,ENSG00000102218,ENSG00000005020,ENSG00000158769,ENSG00000136267,ENSG00000122584,ENSG00000183580,ENSG00000076641,ENSG00000136040,ENSG00000101746…
M106	Oligodendrocyte	12106	202	2211	36.8926	43	1.16554	1.21447	0.151682	ENSG00000163032,ENSG00000145087,ENSG00000163536,ENSG00000144290,ENSG00000164830,ENSG00000022355,ENSG00000104490,ENSG00000112118,ENSG00000135298,ENSG00000144619,ENSG00000132639,ENSG00000184611,ENSG00000112290,ENSG00000152092,ENSG00000145335,ENSG00000117632,ENSG00000101493,ENSG00000185305,ENSG00000119801,ENSG00000162413,ENSG00000196277,ENSG00000149972,ENSG00000005020,ENSG00000158985,ENSG00000136267…
M106	Neuron	12106	202	5889	98.2635	101	1.02785	1.05669	0.375266	ENSG00000163032,ENSG00000196950,ENSG00000145087,ENSG00000163536,ENSG00000144290,ENSG00000164830,ENSG00000022355,ENSG00000179542,ENSG00000106537,ENSG00000175567,ENSG00000104490,ENSG00000123091,ENSG00000112118,ENSG00000003402,ENSG00000107295,ENSG00000135298,ENSG00000144619,ENSG00000163430,ENSG00000129493,ENSG00000164983,ENSG00000132639,ENSG00000184611,ENSG00000112290,ENSG00000132561,ENSG00000132434…
M106	Endothelia	12106	202	1694	28.266	25	0.884455	0.866183	0.776541	ENSG00000196950,ENSG00000175567,ENSG00000003402,ENSG00000135298,ENSG00000163492,ENSG00000115380,ENSG00000197712,ENSG00000185305,ENSG00000146223,ENSG00000145779,ENSG00000158769,ENSG00000127863,ENSG00000129219,ENSG00000136267,ENSG00000136895,ENSG00000162390,ENSG00000122584,ENSG00000170293,ENSG00000111450,ENSG00000183580,ENSG00000104313,ENSG00000197321,ENSG00000197496,ENSG00000054611,ENSG00000188763
M115	Astrocyte	12106	218	1714	30.865	31	1.00437	1.00519	0.519514	ENSG00000164050,ENSG00000186487,ENSG00000129422,ENSG00000166508,ENSG00000164627,ENSG00000172915,ENSG00000079337,ENSG00000166046,ENSG00000106261,ENSG00000089199,ENSG00000186642,ENSG00000118785,ENSG00000145632,ENSG00000213719,ENSG00000137154,ENSG00000152822,ENSG00000157227,ENSG00000124508,ENSG00000135404,ENSG00000073331,ENSG00000172340,ENSG00000108298,ENSG00000125458,ENSG00000111885,ENSG00000149090…
M115	Microglia	12106	218	1566	28.1999	48	1.70213	1.92881	0.000125777	ENSG00000164050,ENSG00000187239,ENSG00000157483,ENSG00000186487,ENSG00000164627,ENSG00000176485,ENSG00000135525,ENSG00000196814,ENSG00000172915,ENSG00000165959,ENSG00000115183,ENSG00000019144,ENSG00000104419,ENSG00000087245,ENSG00000048740,ENSG00000152558,ENSG00000010704,ENSG00000160584,ENSG00000186231,ENSG00000166342,ENSG00000186642,ENSG00000118785,ENSG00000138964,ENSG00000109458,ENSG00000107719…
M115	Oligodendrocyte	12106	218	2211	39.8148	71	1.78326	2.19994	2.21904e-07	ENSG00000114993,ENSG00000115468,ENSG00000136451,ENSG00000023171,ENSG00000187239,ENSG00000157483,ENSG00000165175,ENSG00000168214,ENSG00000198753,ENSG00000186487,ENSG00000130958,ENSG00000166508,ENSG00000143409,ENSG00000176485,ENSG00000135525,ENSG00000021300,ENSG00000141524,ENSG00000196814,ENSG00000172915,ENSG00000139292,ENSG00000204381,ENSG00000165959,ENSG00000019144,ENSG00000145990,ENSG00000109846…
M115	Neuron	12106	218	5889	106.047	90	0.848682	0.738308	0.988354	ENSG00000107338,ENSG00000114993,ENSG00000023171,ENSG00000187239,ENSG00000157483,ENSG00000165175,ENSG00000198753,ENSG00000186487,ENSG00000129422,ENSG00000109381,ENSG00000135525,ENSG00000178764,ENSG00000021300,ENSG00000196814,ENSG00000172915,ENSG00000060762,ENSG00000165959,ENSG00000079337,ENSG00000019144,ENSG00000145990,ENSG00000109846,ENSG00000104419,ENSG00000168672,ENSG00000069966,ENSG00000087245…
M115	Endothelia	12106	218	1694	30.5049	27	0.885104	0.866761	0.782428	ENSG00000164050,ENSG00000157483,ENSG00000129422,ENSG00000021300,ENSG00000204381,ENSG00000106261,ENSG00000152558,ENSG00000089199,ENSG00000162946,ENSG00000176381,ENSG00000186642,ENSG00000198087,ENSG00000122008,ENSG00000065534,ENSG00000107719,ENSG00000157227,ENSG00000124508,ENSG00000172340,ENSG00000111885,ENSG00000149090,ENSG00000123064,ENSG00000137831,ENSG00000095739,ENSG00000100364,ENSG00000108669…
M116	Astrocyte	12106	125	1714	17.6978	6	0.339025	0.303278	0.999817	ENSG00000130304,ENSG00000161016,ENSG00000105357,ENSG00000109062,ENSG00000077312,ENSG00000183569
M116	Microglia	12106	125	1566	16.1697	13	0.803974	0.779405	0.837292	ENSG00000117266,ENSG00000107331,ENSG00000143772,ENSG00000187764,ENSG00000125844,ENSG00000258227,ENSG00000198162,ENSG00000115268,ENSG00000100647,ENSG00000184221,ENSG00000245848,ENSG00000187867,ENSG00000141298
M116	Oligodendrocyte	12106	125	2211	22.8296	35	1.5331	1.75223	0.00476003	ENSG00000137221,ENSG00000133056,ENSG00000117266,ENSG00000107331,ENSG00000143772,ENSG00000187764,ENSG00000211584,ENSG00000125844,ENSG00000136859,ENSG00000097007,ENSG00000104529,ENSG00000130695,ENSG00000104859,ENSG00000066923,ENSG00000163531,ENSG00000171621,ENSG00000259431,ENSG00000065320,ENSG00000105135,ENSG00000198162,ENSG00000126215,ENSG00000116871,ENSG00000152601,ENSG00000109062,ENSG00000119969…
M116	Neuron	12106	125	5889	60.8066	61	1.00318	1.00628	0.521661	ENSG00000114353,ENSG00000137221,ENSG00000133056,ENSG00000107331,ENSG00000180891,ENSG00000197724,ENSG00000116198,ENSG00000100242,ENSG00000211584,ENSG00000125844,ENSG00000154001,ENSG00000143537,ENSG00000130304,ENSG00000066923,ENSG00000163531,ENSG00000161016,ENSG00000168010,ENSG00000259431,ENSG00000204356,ENSG00000204227,ENSG00000161671,ENSG00000106628,ENSG00000258227,ENSG00000109063,ENSG00000177943…
M116	Endothelia	12106	125	1694	17.4913	13	0.743226	0.711224	0.906433	ENSG00000114353,ENSG00000117266,ENSG00000107331,ENSG00000125844,ENSG00000097007,ENSG00000130304,ENSG00000152601,ENSG00000115268,ENSG00000105357,ENSG00000109062,ENSG00000100146,ENSG00000069188,ENSG00000183569
M117	Astrocyte	12106	86	1714	12.1761	13	1.06766	1.08034	0.445559	ENSG00000172037,ENSG00000132692,ENSG00000178814,ENSG00000172638,ENSG00000170889,ENSG00000173207,ENSG00000103260,ENSG00000104112,ENSG00000198937,ENSG00000168913,ENSG00000116793,ENSG00000183773,ENSG00000105193
M117	Microglia	12106	86	1566	11.1247	7	0.629229	0.594585	0.940025	ENSG00000083642,ENSG00000104112,ENSG00000144648,ENSG00000123349,ENSG00000165282,ENSG00000105193,ENSG00000142552
M117	Oligodendrocyte	12106	86	2211	15.7068	11	0.700336	0.65469	0.93314	ENSG00000132692,ENSG00000096384,ENSG00000110092,ENSG00000143367,ENSG00000180834,ENSG00000173207,ENSG00000103260,ENSG00000104112,ENSG00000143387,ENSG00000100399,ENSG00000130307
M117	Neuron	12106	86	5889	41.835	30	0.717104	0.563356	0.99646	ENSG00000172037,ENSG00000078061,ENSG00000148400,ENSG00000132692,ENSG00000138071,ENSG00000083642,ENSG00000049239,ENSG00000096384,ENSG00000221978,ENSG00000176087,ENSG00000172638,ENSG00000153814,ENSG00000135655,ENSG00000074855,ENSG00000173207,ENSG00000234616,ENSG00000166166,ENSG00000156931,ENSG00000168913,ENSG00000123349,ENSG00000116793,ENSG00000180096,ENSG00000154265,ENSG00000111364,ENSG00000176953…
M117	Endothelia	12106	86	1694	12.034	15	1.24646	1.30117	0.2163	ENSG00000172037,ENSG00000148400,ENSG00000132692,ENSG00000178814,ENSG00000110092,ENSG00000196411,ENSG00000103260,ENSG00000144648,ENSG00000107796,ENSG00000198937,ENSG00000168913,ENSG00000116793,ENSG00000183773,ENSG00000105193,ENSG00000130307
M123	Astrocyte	12106	82	1714	11.6098	11	0.947477	0.938942	0.625047	ENSG00000213366,ENSG00000102172,ENSG00000078018,ENSG00000118432,ENSG00000142634,ENSG00000078674,ENSG00000135363,ENSG00000168081,ENSG00000131435,ENSG00000164975,ENSG00000076555
M123	Microglia	12106	82	1566	10.6073	18	1.69694	1.90312	0.0158707	ENSG00000171246,ENSG00000198797,ENSG00000206579,ENSG00000198785,ENSG00000078018,ENSG00000244694,ENSG00000118432,ENSG00000142634,ENSG00000091317,ENSG00000135363,ENSG00000187122,ENSG00000186469,ENSG00000033867,ENSG00000131435,ENSG00000076555,ENSG00000206052,ENSG00000137496,ENSG00000139890
M123	Oligodendrocyte	12106	82	2211	14.9762	13	0.868043	0.842266	0.756407	ENSG00000074317,ENSG00000198797,ENSG00000164742,ENSG00000166257,ENSG00000206579,ENSG00000198785,ENSG00000140945,ENSG00000078018,ENSG00000244694,ENSG00000158258,ENSG00000014138,ENSG00000186732,ENSG00000206052
M123	Neuron	12106	82	5889	39.8891	50	1.25347	1.65501	0.0163888	ENSG00000074317,ENSG00000165985,ENSG00000171246,ENSG00000198797,ENSG00000122733,ENSG00000132359,ENSG00000164742,ENSG00000073670,ENSG00000166257,ENSG00000206579,ENSG00000136999,ENSG00000165983,ENSG00000213366,ENSG00000135622,ENSG00000169258,ENSG00000143195,ENSG00000198785,ENSG00000156564,ENSG00000140945,ENSG00000155545,ENSG00000078018,ENSG00000119125,ENSG00000135365,ENSG00000104888,ENSG00000244694…
M123	Endothelia	12106	82	1694	11.4743	11	0.958663	0.951944	0.60869	ENSG00000206579,ENSG00000213366,ENSG00000152154,ENSG00000118432,ENSG00000091317,ENSG00000135363,ENSG00000168081,ENSG00000033867,ENSG00000131435,ENSG00000164975,ENSG00000076555
M124	Astrocyte	12106	54	1714	7.64547	5	0.653982	0.617581	0.896912	ENSG00000109670,ENSG00000127603,ENSG00000143420,ENSG00000020577,ENSG00000247746
M124	Microglia	12106	54	1566	6.9853	7	1.0021	1.00243	0.55868	ENSG00000081189,ENSG00000176788,ENSG00000130558,ENSG00000187672,ENSG00000198673,ENSG00000183662,ENSG00000165240
M124	Oligodendrocyte	12106	54	2211	9.86238	15	1.52093	1.72612	0.0560778	ENSG00000081189,ENSG00000117152,ENSG00000106089,ENSG00000162989,ENSG00000113319,ENSG00000187672,ENSG00000198673,ENSG00000048540,ENSG00000117020,ENSG00000170745,ENSG00000148848,ENSG00000181751,ENSG00000111110,ENSG00000160014,ENSG00000049130
M124	Neuron	12106	54	5889	26.2685	36	1.37046	2.11809	0.00564496	ENSG00000081189,ENSG00000117152,ENSG00000162817,ENSG00000143013,ENSG00000176788,ENSG00000124785,ENSG00000109670,ENSG00000130558,ENSG00000106089,ENSG00000162989,ENSG00000113319,ENSG00000187672,ENSG00000127603,ENSG00000198673,ENSG00000185722,ENSG00000087152,ENSG00000048540,ENSG00000117020,ENSG00000143420,ENSG00000020577,ENSG00000140043,ENSG00000173926,ENSG00000111110,ENSG00000164600,ENSG00000127399…
M124	Endothelia	12106	54	1694	7.55625	8	1.05873	1.06928	0.489815	ENSG00000162817,ENSG00000109670,ENSG00000106089,ENSG00000127603,ENSG00000020577,ENSG00000181751,ENSG00000120341,ENSG00000049130
M126	Astrocyte	12106	187	1714	26.476	34	1.28418	1.35433	0.0721915	ENSG00000110427,ENSG00000151090,ENSG00000170579,ENSG00000004468,ENSG00000078902,ENSG00000176204,ENSG00000136535,ENSG00000177694,ENSG00000135063,ENSG00000016391,ENSG00000155189,ENSG00000091986,ENSG00000147872,ENSG00000134824,ENSG00000152377,ENSG00000119866,ENSG00000133195,ENSG00000147255,ENSG00000170011,ENSG00000137726,ENSG00000116171,ENSG00000089169,ENSG00000235162,ENSG00000116701,ENSG00000008394…
M126	Microglia	12106	187	1566	24.1898	29	1.19885	1.23976	0.17104	ENSG00000183775,ENSG00000183454,ENSG00000151090,ENSG00000136928,ENSG00000169744,ENSG00000197147,ENSG00000197106,ENSG00000179456,ENSG00000078902,ENSG00000171603,ENSG00000176204,ENSG00000147251,ENSG00000241973,ENSG00000147872,ENSG00000159322,ENSG00000166501,ENSG00000142961,ENSG00000189108,ENSG00000100439,ENSG00000105875,ENSG00000116701,ENSG00000182263,ENSG00000133800,ENSG00000184584,ENSG00000233927…
M126	Oligodendrocyte	12106	187	2211	34.1531	49	1.43472	1.60235	0.00425153	ENSG00000183775,ENSG00000183454,ENSG00000151090,ENSG00000160145,ENSG00000002746,ENSG00000170579,ENSG00000136928,ENSG00000197147,ENSG00000113100,ENSG00000114423,ENSG00000197106,ENSG00000084754,ENSG00000176204,ENSG00000136535,ENSG00000102032,ENSG00000177694,ENSG00000016391,ENSG00000144331,ENSG00000091986,ENSG00000169918,ENSG00000152377,ENSG00000108679,ENSG00000166501,ENSG00000189108,ENSG00000067606…
M126	Neuron	12106	187	5889	90.9667	93	1.02235	1.04519	0.410365	ENSG00000183775,ENSG00000110427,ENSG00000158445,ENSG00000183454,ENSG00000151090,ENSG00000160145,ENSG00000002746,ENSG00000170579,ENSG00000136928,ENSG00000117016,ENSG00000169744,ENSG00000197147,ENSG00000185274,ENSG00000113100,ENSG00000006116,ENSG00000114423,ENSG00000088179,ENSG00000203778,ENSG00000197106,ENSG00000179456,ENSG00000004468,ENSG00000047230,ENSG00000078902,ENSG00000173960,ENSG00000171603…
M126	Endothelia	12106	187	1694	26.167	37	1.41399	1.52757	0.0171651	ENSG00000110427,ENSG00000151090,ENSG00000160145,ENSG00000004468,ENSG00000176204,ENSG00000136535,ENSG00000177694,ENSG00000135063,ENSG00000016391,ENSG00000144331,ENSG00000091986,ENSG00000134824,ENSG00000152377,ENSG00000119866,ENSG00000135862,ENSG00000067606,ENSG00000133195,ENSG00000147255,ENSG00000151491,ENSG00000170011,ENSG00000005243,ENSG00000087842,ENSG00000089169,ENSG00000235162,ENSG00000116701…
M127	Astrocyte	12106	84	1714	11.8929	9	0.756751	0.726141	0.858473	ENSG00000084731,ENSG00000147027,ENSG00000104267,ENSG00000171612,ENSG00000067560,ENSG00000050767,ENSG00000178445,ENSG00000101160,ENSG00000132825
M127	Microglia	12106	84	1566	10.866	11	1.01233	1.01429	0.531652	ENSG00000114554,ENSG00000078369,ENSG00000092200,ENSG00000100628,ENSG00000106799,ENSG00000125257,ENSG00000101160,ENSG00000100292,ENSG00000141622,ENSG00000205726,ENSG00000135677
M127	Oligodendrocyte	12106	84	2211	15.3415	15	0.977741	0.972715	0.583118	ENSG00000095209,ENSG00000104267,ENSG00000165495,ENSG00000077063,ENSG00000166963,ENSG00000137766,ENSG00000106799,ENSG00000013375,ENSG00000151239,ENSG00000166471,ENSG00000141622,ENSG00000152217,ENSG00000205726,ENSG00000058272,ENSG00000091651
M127	Neuron	12106	84	5889	40.8621	41	1.00338	1.00664	0.531188	ENSG00000084731,ENSG00000114554,ENSG00000143815,ENSG00000132300,ENSG00000197386,ENSG00000122778,ENSG00000147027,ENSG00000078369,ENSG00000008853,ENSG00000104267,ENSG00000197601,ENSG00000165495,ENSG00000059691,ENSG00000145907,ENSG00000166562,ENSG00000110315,ENSG00000116731,ENSG00000151923,ENSG00000157014,ENSG00000077063,ENSG00000008405,ENSG00000162402,ENSG00000166963,ENSG00000137766,ENSG00000067560…
M127	Endothelia	12106	84	1694	11.7542	12	1.02091	1.02457	0.516941	ENSG00000084731,ENSG00000147027,ENSG00000173930,ENSG00000104267,ENSG00000067560,ENSG00000050767,ENSG00000054598,ENSG00000178445,ENSG00000125257,ENSG00000101160,ENSG00000132825,ENSG00000058272
M128	Astrocyte	12106	57	1714	8.07021	9	1.11521	1.13749	0.417735	ENSG00000110841,ENSG00000091428,ENSG00000090238,ENSG00000090520,ENSG00000118985,ENSG00000154114,ENSG00000088387,ENSG00000196628,ENSG00000154914
M128	Microglia	12106	57	1566	7.37337	9	1.22061	1.26346	0.314121	ENSG00000121440,ENSG00000248905,ENSG00000175745,ENSG00000134602,ENSG00000087263,ENSG00000089250,ENSG00000034152,ENSG00000196227,ENSG00000154237
M128	Oligodendrocyte	12106	57	2211	10.4103	10	0.960588	0.951975	0.609887	ENSG00000119042,ENSG00000110841,ENSG00000248905,ENSG00000182568,ENSG00000091428,ENSG00000172469,ENSG00000118985,ENSG00000101333,ENSG00000183778,ENSG00000196628
M128	Neuron	12106	57	5889	27.7278	37	1.3344	1.95894	0.00964	ENSG00000119042,ENSG00000135638,ENSG00000146147,ENSG00000121440,ENSG00000149927,ENSG00000110841,ENSG00000094975,ENSG00000248905,ENSG00000188916,ENSG00000182568,ENSG00000157782,ENSG00000137501,ENSG00000175745,ENSG00000080561,ENSG00000091428,ENSG00000147246,ENSG00000090238,ENSG00000134443,ENSG00000213930,ENSG00000121297,ENSG00000090520,ENSG00000155980,ENSG00000110237,ENSG00000178718,ENSG00000118985…
M128	Endothelia	12106	57	1694	7.97604	9	1.12838	1.15323	0.403523	ENSG00000110841,ENSG00000137501,ENSG00000091428,ENSG00000090238,ENSG00000090520,ENSG00000118985,ENSG00000088387,ENSG00000154237,ENSG00000196628
M146	Astrocyte	12106	71	1714	10.0524	24	2.3875	3.12535	2.29568e-05	ENSG00000135540,ENSG00000114790,ENSG00000144730,ENSG00000165029,ENSG00000145476,ENSG00000146648,ENSG00000154310,ENSG00000104447,ENSG00000074047,ENSG00000010810,ENSG00000148498,ENSG00000168309,ENSG00000075142,ENSG00000146535,ENSG00000078177,ENSG00000165966,ENSG00000142867,ENSG00000126785,ENSG00000183044,ENSG00000153944,ENSG00000174306,ENSG00000185033,ENSG00000130520,ENSG00000141485
[truncated: 344 more rows]
