# Supplementary material for: Systematical comparison reveals distinct brain transcriptomic features in models of depression induced by gut microbiota dysbiosis and chronic stress
Source: Research Square preprint supplement (doi:10.21203/rs.3.rs-4134877/v1), 2024-03-29
Supplement: Supplementary file 4 [file 487063f6b8128d12d3904aa5.xlsx]

## Sheet: GOBP.FMT
Term	Description	Ratio	P.value	Odds.Ratio	Combined.Score	Genes	Overlap	Ratio.value	Cluster
GO:0031338	regulation of vesicle fusion	4/9	9.55364e-06	46.9397	542.557	ANXA1;ANXA2;SPHK1;DOC2B	4	0.444444	1
GO:1904263	positive regulation of TORC1 signaling	4/16	0.000125613	19.5512	175.615	SEH1L;RRAGD;SIK3;LAMTOR5	4	0.25	2
GO:0031340	positive regulation of vesicle fusion	3/7	0.000160609	43.8772	383.335	ANXA1;ANXA2;DOC2B	3	0.428571	1
GO:0120162	positive regulation of cold-induced thermogenesis	8/97	0.000244708	5.31505	44.197	OXTR;THRA;GRB10;G0S2;PTH2R;STAT6;KSR2;ZBTB7B	8	0.0824742	3
GO:1903432	regulation of TORC1 signaling	5/35	0.000290355	9.79591	79.7819	DYRK3;SEH1L;RRAGD;SIK3;LAMTOR5	5	0.142857	2
GO:0090331	negative regulation of platelet aggregation	3/9	0.000375845	29.2485	230.664	CD9;ALOX12;PRKG1	3	0.333333	2
GO:0009893	positive regulation of metabolic process	8/113	0.000686128	4.50145	32.7906	OXTR;THRA;GRB10;G0S2;PTH2R;STAT6;KSR2;ZBTB7B	8	0.0707965	4
GO:0034111	negative regulation of homotypic cell-cell adhesion	3/11	0.000719878	21.9342	158.725	CD9;ALOX12;PRKG1	3	0.272727	5
GO:0006468	protein phosphorylation	18/496	0.00213451	2.25038	13.8388	DDR1;DYRK3;PNCK;DYRK2;DCLK3;PTK2;NRBP2;PAK1;STK36;SIK3;NEK10;PIM3;MAPK6;EPHB1;IKBKE;EPHA3;FGFR2;PRKG1	18	0.0362903	4
GO:0010544	negative regulation of platelet activation	3/16	0.00229433	13.4945	82.0104	CD9;ALOX12;PRKG1	3	0.1875	2
GO:0043588	skin development	6/80	0.00237969	4.76917	28.8096	SCEL;CLIC4;ANXA1;COL5A3;ALOX12;ALOXE3	6	0.075	3
GO:0090330	regulation of platelet aggregation	3/18	0.00326037	11.694	66.9591	CD9;ALOX12;PRKG1	3	0.166667	5
GO:0033674	positive regulation of kinase activity	7/114	0.00330752	3.85311	22.0073	DDR1;RASSF2;RAP1A;EPHB1;EPHA3;PTK2;FGFR2	7	0.0614035	4
GO:0016055	Wnt signaling pathway	6/92	0.00477137	4.10119	21.9214	FZD1;FRZB;FZD4;WNT9A;GPC4;WNT2	6	0.0652174	2
GO:0032008	positive regulation of TOR signaling	4/41	0.0050106	6.33288	33.5402	SEH1L;RRAGD;SIK3;LAMTOR5	4	0.097561	2
GO:0043651	linoleic acid metabolic process	3/21	0.00511832	9.74355	51.3965	ELOVL1;ALOX12;ALOXE3	3	0.142857	4
GO:2000679	positive regulation of transcription regulatory region DNA binding	3/21	0.00511832	9.74355	51.3965	NIBAN2;TRAF6;LAMTOR5	3	0.142857	6
GO:0060070	canonical Wnt signaling pathway	5/68	0.00591994	4.65688	23.8871	FZD1;FRZB;FZD4;WNT9A;WNT2	5	0.0735294	2
GO:0071300	cellular response to retinoic acid	4/43	0.00594684	6.0075	30.7878	FZD4;WNT9A;WNT2;EPHA3	4	0.0930233	2
GO:0043687	post-translational protein modification	13/345	0.00626449	2.32165	11.7774	GOLM1;WFS1;RHBDD1;FN3KRP;KLHL11;LMO7;DCAF5;FBXO10;PSMB8;PSMB9;LGALS1;KBTBD6;STT3B	13	0.0376812	4
GO:0022008	neurogenesis	4/44	0.00645576	5.85701	29.5357	ANXA1;HAP1;EPHB1;WNT2	4	0.0909091	3
GO:0060285	cilium-dependent cell motility	3/23	0.00664737	8.7683	43.9602	DNAH8;RSPH9;DRC1	3	0.130435	1
GO:0032006	regulation of TOR signaling	5/71	0.00709732	4.44452	21.9917	DYRK3;SEH1L;RRAGD;GPAT3;LAMTOR5	5	0.0704225	2
GO:0030947	regulation of vascular endothelial growth factor receptor signaling pathway	3/24	0.00750287	8.35034	40.8538	NIBAN2;GRB10;CNMD	3	0.125	2
GO:0030879	mammary gland development	3/24	0.00750287	8.35034	40.8538	OXTR;ZBTB7B;WNT2	3	0.125	3
GO:0007411	axon guidance	9/203	0.00797515	2.73669	13.2221	NIBAN2;DAG1;GRB10;LAMC2;SEMA3F;EPHB1;EPHA3;PTK2;ROBO1	9	0.044335	2
GO:0007409	axonogenesis	10/240	0.00807363	2.56786	12.3749	NTNG2;NIBAN2;DAG1;GRB10;SEMA3F;EPHB1;EPHA3;PTK2;FGFR2;ROBO1	10	0.0416667	3
GO:1900180	regulation of protein localization to nucleus	4/47	0.00815344	5.44755	26.199	NVL;CTNNA1;PARP9;LAMTOR5	4	0.0851064	1
GO:0051963	regulation of synapse assembly	4/47	0.00815344	5.44755	26.199	SRPX2;LHFPL4;GPC4;EPHB1	4	0.0851064	3
GO:0003148	outflow tract septum morphogenesis	3/25	0.00842043	7.97037	38.0752	FGFR2;ROBO1;ENG	3	0.12	3
GO:0034198	cellular response to amino acid starvation	5/74	0.00842912	4.25063	20.3013	SEH1L;RRAGD;TCIRG1;GCN1;LAMTOR5	5	0.0675676	2
GO:1990928	response to amino acid starvation	5/75	0.00890899	4.18969	19.7783	SEH1L;RRAGD;TCIRG1;GCN1;LAMTOR5	5	0.0666667	2
GO:0006464	cellular protein modification process	28/1025	0.00903845	1.68542	7.93202	DYRK3;DYRK2;KLHL11;DCAF5;DUSP16;NRBP2;PAK1;LGALS1;STK36;PIM3;MAPK6;IKBKE;PRKG1;ANXA1;GOLM1;WFS1;RHBDD1;FN3KRP;LMO7;PARP9;FBXO10;PSMB8;PSMB9;KBTBD6;SIK3;NEK10;FBXL2;STT3B	28	0.0273171	4
GO:0034332	adherens junction organization	4/49	0.0094337	5.20491	24.2729	CADM3;CTNNA1;CDH24;NECTIN1	4	0.0816327	7
GO:0072329	monocarboxylic acid catabolic process	3/27	0.0104454	7.30543	33.3244	CYP26B1;NUDT19;FAH	3	0.111111	4
GO:0015949	nucleobase-containing small molecule interconversion	3/27	0.0104454	7.30543	33.3244	DCTD;RRM2;AK5	3	0.111111	4
GO:0045600	positive regulation of fat cell differentiation	4/51	0.010838	4.98292	22.5462	FRZB;NAPEPLD;ZBTB7B;MEDAG	4	0.0784314	3
GO:0001819	positive regulation of cytokine production	12/335	0.0122847	2.19706	9.66577	GBP5;ANXA1;SPHK1;TRAF6;IRF7;IL12A;IL16;STAT6;POLR3H;ZBTB7B;IL17RA;LAMTOR5	12	0.0358209	4
GO:0009913	epidermal cell differentiation	4/53	0.0123706	4.77904	20.9916	SCEL;CLIC4;ANXA1;OVOL2	4	0.0754717	3
GO:0048013	ephrin receptor signaling pathway	5/82	0.0128054	3.80745	16.5924	PAK1;ARPC1B;EPHB1;EPHA3;PTK2	5	0.0609756	2
GO:0008544	epidermis development	5/83	0.0134426	3.75844	16.1964	SCEL;LAMC2;PLOD1;FGFR2;OVOL2	5	0.060241	3
GO:0009968	negative regulation of signal transduction	10/267	0.0161131	2.29489	9.47359	TSPAN15;RGS2;CYP26B1;NIBAN2;FRZB;TMBIM1;GRB10;IL12A;CNMD;NKD1	10	0.0374532	2
GO:0030178	negative regulation of Wnt signaling pathway	8/191	0.0164674	2.5725	10.5636	INVS;RNF213;FZD4;FRZB;GRB10;NKD1;PSMB8;PSMB9	8	0.0418848	2
GO:0051924	regulation of calcium ion transport	4/58	0.0167873	4.33543	17.7195	TRPC6;HOMER1;WFS1;IL16	4	0.0689655	1
GO:0050954	sensory perception of mechanical stimulus	5/88	0.0169495	3.53113	14.3982	WFS1;COL11A2;LHFPL4;EPS8L2;PDZD7	5	0.0568182	3
GO:0032660	regulation of interleukin-17 production	3/33	0.0180873	5.84256	23.4435	SPHK1;IL12A;ZBTB7B	3	0.0909091	4
GO:0010638	positive regulation of organelle organization	3/33	0.0180873	5.84256	23.4435	ANXA1;ANXA2;DOC2B	3	0.0909091	7
GO:0043066	negative regulation of apoptotic process	15/485	0.0189972	1.89037	7.4924	ANXA1;NIBAN2;WFS1;ANXA4;SPHK1;GLO1;RHBDD1;ALOX12;PTK2;NRBP2;RNF213;TRAF6;PIM3;TMEM14A;LAMTOR5	15	0.0309278	8
GO:0007605	sensory perception of sound	5/91	0.0193202	3.40743	13.4478	WFS1;COL11A2;LHFPL4;EPS8L2;PDZD7	5	0.0549451	3
GO:0032526	response to retinoic acid	4/62	0.020949	4.03562	15.6003	FZD4;WNT9A;WNT2;EPHA3	4	0.0645161	2
GO:0007224	smoothened signaling pathway	3/35	0.021168	5.47684	21.1147	DYRK2;STK36;B9D1	3	0.0857143	2
GO:0030334	regulation of cell migration	13/408	0.0225264	1.945	7.37752	NTNG2;CLIC4;ANXA1;SPHK1;LAMC2;SEMA3F;PTK2;NKD1;ROBO1;PAK1;DACH1;DAG1;ENG	13	0.0318627	1
GO:0010975	regulation of neuron projection development	7/165	0.022656	2.60258	9.85684	FZD1;MYLIP;NTNG2;PAK1;RAP1A;KIF13B;EPHA3	7	0.0424242	3
GO:0051053	negative regulation of DNA metabolic process	3/36	0.0228093	5.31061	20.0772	DACH1;NIBAN2;SUB1	3	0.0833333	4
GO:0045088	regulation of innate immune response	4/64	0.0232466	3.9007	14.6729	GBP5;IFI35;PARP9;USP18	4	0.0625	2
GO:0071357	cellular response to type I interferon	4/65	0.0244505	3.83655	14.2379	IRF7;IFI35;IRF9;PSMB8	4	0.0615385	2
GO:0060337	type I interferon signaling pathway	4/65	0.0244505	3.83655	14.2379	IRF7;IFI35;IRF9;PSMB8	4	0.0615385	2
GO:0008089	anterograde axonal transport	3/37	0.0245179	5.15415	19.1134	BLOC1S5;KIF1C;HAP1	3	0.0810811	1
GO:0031952	regulation of protein autophosphorylation	3/37	0.0245179	5.15415	19.1134	RASSF2;NEK10;ENG	3	0.0810811	4
GO:0051091	positive regulation of DNA-binding transcription factor activity	9/246	0.0249138	2.23521	8.25316	FZD1;FZD4;STK36;SPHK1;TRAF6;NLRC4;IKBKE;WNT2;LAMTOR5	9	0.0365854	4
GO:0031349	positive regulation of defense response	5/98	0.0256708	3.14983	11.5359	GBP5;NAPEPLD;IL16;IFI35;IL17RA	5	0.0510204	2
GO:0045787	positive regulation of cell cycle	4/66	0.0256914	3.77448	13.8206	CCND1;SPHK1;USP2;FGFR2	4	0.0606061	7
GO:0033619	membrane protein proteolysis	3/39	0.0281367	4.86731	17.3796	RHBDD1;TRAF6;DAG1	3	0.0769231	4
GO:0060828	regulation of canonical Wnt signaling pathway	9/253	0.0291204	2.17031	7.67489	INVS;SCEL;AMER3;FZD4;FRZB;NKD1;PSMB8;FGFR2;PSMB9	9	0.0355731	2
GO:0042327	positive regulation of phosphorylation	9/253	0.0291204	2.17031	7.67489	DDR1;PAK1;CCND1;EPHB1;PDE8A;EPHA3;PTK2;FGFR2;ENG	9	0.0355731	4
GO:0018108	peptidyl-tyrosine phosphorylation	4/69	0.0296384	3.59972	12.6663	DDR1;EPHA3;PTK2;FGFR2	4	0.057971	4
GO:0043406	positive regulation of MAP kinase activity	4/69	0.0296384	3.59972	12.6663	PAK1;TRAF6;NEK10;ROBO1	4	0.057971	2
GO:0071417	cellular response to organonitrogen compound	5/103	0.0309388	2.98836	10.3868	HRH1;RAP1A;RRAGD;CTNNA1;LAMTOR5	5	0.0485437	2
GO:0032103	positive regulation of response to external stimulus	6/139	0.0312824	2.64553	9.16598	GBP5;NAPEPLD;IL16;IFI35;DDX60;IL17RA	6	0.0431655	2
GO:0030865	cortical cytoskeleton organization	3/41	0.032023	4.61067	15.8667	FMNL1;RHOBTB3;LCP1	3	0.0731707	7
GO:0030216	keratinocyte differentiation	3/41	0.032023	4.61067	15.8667	SCEL;CLIC4;ANXA1	3	0.0731707	3
GO:0038096	Fc-gamma receptor signaling pathway involved in phagocytosis	4/71	0.0324581	3.49191	11.9696	PAK1;ARPC1B;WIPF3;PTK2	4	0.056338	2
GO:1903829	positive regulation of cellular protein localization	4/71	0.0324581	3.49191	11.9696	NECAB2;SNX33;PARP9;LAMTOR5	4	0.056338	1
GO:0038094	Fc-gamma receptor signaling pathway	4/72	0.0339248	3.44039	11.6409	PAK1;ARPC1B;WIPF3;PTK2	4	0.0555556	2
GO:0002479	antigen processing and presentation of exogenous peptide antigen via MHC class I, TAP-dependent	4/73	0.0354296	3.39035	11.3245	CYBB;TAP1;PSMB8;PSMB9	4	0.0547945	9
GO:0051336	regulation of hydrolase activity	4/73	0.0354296	3.39035	11.3245	PRKG1;EPHA3;PTK2;FGD2	4	0.0547945	6
GO:0010810	regulation of cell-substrate adhesion	3/43	0.0361749	4.37969	14.5379	FZD4;FBLN2;PTK2	3	0.0697674	5
GO:1900015	regulation of cytokine production involved in inflammatory response	3/43	0.0361749	4.37969	14.5379	CHID1;GBP5;IL17RA	3	0.0697674	4
GO:0002431	Fc receptor mediated stimulatory signaling pathway	4/74	0.0369725	3.34175	11.0197	PAK1;ARPC1B;WIPF3;PTK2	4	0.0540541	2
GO:0030148	sphingolipid biosynthetic process	4/74	0.0369725	3.34175	11.0197	ELOVL1;SPHK1;ALOXE3;CERS2	4	0.0540541	4
GO:0038061	NIK/NF-kappaB signaling	4/74	0.0369725	3.34175	11.0197	TRAF6;PSMB8;RELB;PSMB9	4	0.0540541	2
GO:0051962	positive regulation of nervous system development	3/45	0.0405892	4.17071	13.364	SRPX2;ZNF335;EPHB1	3	0.0666667	3
GO:0002833	positive regulation of response to biotic stimulus	3/45	0.0405892	4.17071	13.364	GBP5;IFI35;DDX60	3	0.0666667	2
GO:0030111	regulation of Wnt signaling pathway	5/111	0.0406894	2.76169	8.84235	AMER3;FRZB;GRB10;FGFR2;NKD1	5	0.045045	2
GO:0016310	phosphorylation	12/400	0.0409538	1.82285	5.82458	NRBP2;PAK1;DYRK3;DYRK2;STK36;SPHK1;SIK3;NEK10;PIM3;MAPK6;IKBKE;PRKG1	12	0.03	4
GO:0051493	regulation of cytoskeleton organization	5/112	0.042025	2.73574	8.67092	CLIC4;PAK1;RHOBTB3;EPHA3;PTK2	5	0.0446429	7
GO:0051052	regulation of DNA metabolic process	3/46	0.0428937	4.0735	12.8276	WDR70;RADX;SUB1	3	0.0652174	4
GO:0035722	interleukin-12-mediated signaling pathway	3/46	0.0428937	4.0735	12.8276	ANXA2;IL12A;LCP1	3	0.0652174	2
GO:0042590	antigen processing and presentation of exogenous peptide antigen via MHC class I	4/78	0.0435258	3.16047	9.90618	CYBB;TAP1;PSMB8;PSMB9	4	0.0512821	9
GO:0007169	transmembrane receptor protein tyrosine kinase signaling pathway	12/404	0.0435967	1.80388	5.65113	DDR1;BCAR3;PAK1;ARPC1B;GRB10;CYBB;HAP1;TCIRG1;EPHB1;EPHA3;PTK2;FGFR2	12	0.029703	2
GO:0071560	cellular response to transforming growth factor beta stimulus	5/114	0.0447747	2.68527	8.34075	FNTA;WNT2;PTK2;OVOL2;ENG	5	0.0438596	2
GO:2000146	negative regulation of cell motility	5/114	0.0447747	2.68527	8.34075	CLIC4;DACH1;DAG1;ROBO1;ENG	5	0.0438596	1
GO:1990858	cellular response to lectin	5/115	0.0461891	2.66072	8.18176	PAK1;TRAF6;PSMB8;RELB;PSMB9	5	0.0434783	2
GO:0002223	stimulatory C-type lectin receptor signaling pathway	5/115	0.0461891	2.66072	8.18176	PAK1;TRAF6;PSMB8;RELB;PSMB9	5	0.0434783	2
GO:1901222	regulation of NIK/NF-kappaB signaling	4/80	0.0470315	3.07698	9.40615	RASSF2;SPHK1;TRAF6;IFI35	4	0.05	2
GO:0006811	ion transport	5/116	0.0476297	2.63662	8.02665	SLC24A4;TRPC6;ATP10D;SLC17A6;SLC4A2	5	0.0431034	1
GO:0071349	cellular response to interleukin-12	3/48	0.0476946	3.89206	11.8433	ANXA2;IL12A;LCP1	3	0.0625	2
GO:0042552	myelination	3/48	0.0476946	3.89206	11.8433	PLLP;PMP22;TNFRSF21	3	0.0625	3
GO:0031346	positive regulation of cell projection organization	5/117	0.0490968	2.61294	7.87531	FZD1;RAP1A;FZD4;EPHA3;ROBO1	5	0.042735	7

## Sheet: GOBP.CSDS
Term	Description	Ratio	P.value	Odds.Ratio	Combined.Score	Genes	Overlap	Ratio.value	Cluster
GO:0006024	glycosaminoglycan biosynthetic process	9/97	3.56947e-05	6.16091	63.0908	ANGPT1;DSEL;DSE;PXYLP1;GPC4;ST3GAL1;HS3ST1;ST3GAL3;CHST3	9	0.0927835	1
GO:0043269	regulation of ion transport	8/79	5.17917e-05	6.77266	66.8345	P2RX4;KCNJ11;NOS1;ATP1A1;DRD1;SYT9;KCNJ2;SYT6	8	0.101266	2
GO:0086010	membrane depolarization during action potential	5/26	6.21371e-05	14.217	137.708	CACNA1I;CACNA1C;SCN3A;KCNJ2;CACNA1G	5	0.192308	2
GO:0017158	regulation of calcium ion-dependent exocytosis	5/31	0.000149885	11.48	101.089	CACNA1I;REST;SYT9;CACNA1G;SYT6	5	0.16129	2
GO:0072529	pyrimidine-containing compound catabolic process	4/17	0.000153083	18.3245	160.972	NT5E;DPYSL5;NT5C1A;DPYSL3	4	0.235294	1
GO:0051899	membrane depolarization	5/32	0.000175229	11.0543	95.6129	CACNA1I;P2RX4;CACNA1E;SCN3A;CACNA1G	5	0.15625	2
GO:0086003	cardiac muscle cell contraction	4/19	0.000242815	15.8796	132.169	ATP1A1;CACNA1C;KCNJ2;CACNA1G	4	0.210526	3
GO:0007200	phospholipase C-activating G protein-coupled receptor signaling pathway	7/81	0.000410569	5.66758	44.1956	PTGER3;HTR2C;OPRK1;ADRA1D;DRD1;ESR1;TRHR	7	0.0864198	2
GO:0050654	chondroitin sulfate proteoglycan metabolic process	3/10	0.000507678	25.454	193.086	DSEL;DSE;PXYLP1	3	0.3	1
GO:0007411	axon guidance	11/203	0.00063828	3.45417	25.4114	EPHA5;SEMA5A;NOTCH2;ROBO3;SHH;SEMA7A;EPHA10;NFIB;SEMA3D;PLXNC1;EPHA3	11	0.0541872	3
GO:0043062	extracellular structure organization	11/216	0.00106185	3.23297	22.1385	SMOC2;COL15A1;VCAM1;COL11A1;ITGA1;COL4A5;COL6A3;NDNF;NPNT;NID1;FBLN5	11	0.0509259	3
GO:0045229	external encapsulating structure organization	11/217	0.00110228	3.21711	21.9097	SMOC2;COL15A1;VCAM1;COL11A1;ITGA1;COL4A5;COL6A3;NDNF;NPNT;NID1;FBLN5	11	0.0506912	3
GO:0070509	calcium ion import	4/28	0.00113946	9.9202	67.2312	CACNA1I;CACNA1C;CACNA1E;CACNA1G	4	0.142857	2
GO:0046033	AMP metabolic process	3/13	0.00116575	17.8151	120.33	NT5E;NT5C1A;ADSS1	3	0.230769	1
GO:0055119	relaxation of cardiac muscle	3/13	0.00116575	17.8151	120.33	P2RX4;ATP1A1;KCNJ2	3	0.230769	3
GO:0090075	relaxation of muscle	3/14	0.00146541	16.1947	105.681	P2RX4;ATP1A1;KCNJ2	3	0.214286	3
GO:0062009	secondary palate development	3/14	0.00146541	16.1947	105.681	TGFBR3;WNT7A;LRRC32	3	0.214286	3
GO:0035581	sequestering of extracellular ligand from receptor	3/14	0.00146541	16.1947	105.681	GREM2;FSTL1;LTBP1	3	0.214286	2
GO:0008272	sulfate transport	3/14	0.00146541	16.1947	105.681	SLC26A7;SLC26A11;SLC26A4	3	0.214286	2
GO:1902894	negative regulation of pri-miRNA transcription by RNA polymerase II	3/14	0.00146541	16.1947	105.681	REST;NFIB;PPARG	3	0.214286	1
GO:0086001	cardiac muscle cell action potential	4/30	0.00148564	9.15618	59.6242	ATP1A1;CACNA1C;KCNJ2;CACNA1G	4	0.133333	2
GO:0030204	chondroitin sulfate metabolic process	4/30	0.00148564	9.15618	59.6242	DSEL;DSE;NDNF;CHST3	4	0.133333	1
GO:0086002	cardiac muscle cell action potential involved in contraction	4/31	0.00168354	8.81661	56.3104	ATP1A1;CACNA1C;KCNJ2;CACNA1G	4	0.129032	3
GO:0002040	sprouting angiogenesis	5/52	0.00172243	6.34385	40.3724	SEMA5A;BMPER;ANGPT1;RSPO3;VEGFC	5	0.0961538	3
GO:2001026	regulation of endothelial cell chemotaxis	3/15	0.00180923	14.8444	93.7403	SEMA5A;SMOC2;P2RX4	3	0.2	2
GO:2001028	positive regulation of endothelial cell chemotaxis	3/15	0.00180923	14.8444	93.7403	SEMA5A;SMOC2;P2RX4	3	0.2	2
GO:0070372	regulation of ERK1 and ERK2 cascade	11/238	0.00229159	2.91634	17.727	NOTCH2;TGFBR3;PTPRR;SEMA7A;BMPER;ANGPT1;LMO3;HTR2C;ACKR3;NPNT;MTURN	11	0.0462185	2
GO:0098662	inorganic cation transmembrane transport	12/274	0.00230688	2.76004	16.7586	SLC9A5;P2RX4;KCNC1;SLC30A3;KCNJ11;SLC6A15;SLC40A1;CACNA1C;ATP1A1;SCN3A;KCNJ2;CACNA1G	12	0.0437956	2
GO:0018212	peptidyl-tyrosine modification	5/56	0.00239801	5.8451	35.2642	FLT1;PKDCC;FLT3;ABI3;EPHA3	5	0.0892857	1
GO:0007409	axonogenesis	11/240	0.00244502	2.89057	17.383	EPHA5;SEMA5A;NOTCH2;ROBO3;SHH;SEMA7A;EPHA10;SEMA3D;MAP1B;WNT7A;EPHA3	11	0.0458333	3
GO:0030111	regulation of Wnt signaling pathway	7/111	0.00262412	4.02652	23.9297	FRZB;RSPO2;RSPO3;APCDD1;SULF1;ESR1;HIC1	7	0.0630631	2
GO:0071880	adenylate cyclase-activating adrenergic receptor signaling pathway	3/17	0.00263787	12.7225	75.5434	ADRA1D;ADRB1;DRD1	3	0.176471	2
GO:0086012	membrane depolarization during cardiac muscle cell action potential	3/17	0.00263787	12.7225	75.5434	CACNA1C;KCNJ2;CACNA1G	3	0.176471	2
GO:0030336	negative regulation of cell migration	8/144	0.00293897	3.524	20.5438	ADGRG1;PTPRR;SHH;MCTP1;ZMYND8;DLG5;DPYSL3;SULF1	8	0.0555556	2
GO:2000146	negative regulation of cell motility	7/114	0.00304766	3.91303	22.6697	FRMD5;SHH;MCTP1;ZMYND8;DLG5;DPYSL3;SULF1	7	0.0614035	2
GO:0001755	neural crest cell migration	4/37	0.00326708	7.21139	41.277	SEMA5A;SEMA7A;SHH;SEMA3D	4	0.108108	3
GO:0007204	positive regulation of cytosolic calcium ion concentration	8/147	0.00333469	3.44741	19.6619	P2RX4;PTGER3;HTR2C;ACKR3;ADRA1D;CACNA1C;DRD1;ESR1	8	0.0544218	2
GO:0051347	positive regulation of transferase activity	8/148	0.0034754	3.42261	19.379	EPHA5;UBE2I;FLT1;EPHA10;LMO4;FLT3;PLK1;EPHA3	8	0.0540541	2
GO:0031346	positive regulation of cell projection organization	7/117	0.0035216	3.80573	21.4979	CHODL;CUX2;DPYSL3;NDNF;PLXNC1;TOX;EPHA3	7	0.0598291	3
GO:0031644	regulation of nervous system process	3/19	0.00366731	11.131	62.4262	TMEM108;HTR2C;NPTX1	3	0.157895	3
GO:0007189	adenylate cyclase-activating G protein-coupled receptor signaling pathway	7/118	0.00369143	3.77125	21.1256	ADGRG1;GPR12;PTGER3;ADRB1;ADRA1D;DRD1;CRHR1	7	0.059322	2
GO:0030334	regulation of cell migration	15/408	0.00377271	2.30599	12.8673	SEMA5A;SEMA7A;MCTP1;FLT1;LMO4;SEMA3D;ZMYND8;SULF1;SHH;FRMD5;ABI3;DLG5;DPYSL3;PLXNC1;DRD1	15	0.0367647	2
GO:0050709	negative regulation of protein secretion	4/39	0.00396396	6.79861	37.5998	REST;RAB11FIP1;KCNJ11;RSAD2	4	0.102564	2
GO:0071875	adrenergic receptor signaling pathway	3/20	0.00426162	10.4757	57.1777	ADRA1D;ADRB1;DRD1	3	0.15	2
GO:0048843	negative regulation of axon extension involved in axon guidance	3/20	0.00426162	10.4757	57.1777	SEMA5A;SEMA7A;SEMA3D	3	0.15	3
GO:0008016	regulation of heart contraction	6/93	0.00468276	4.11669	22.0814	P2RX4;KCNJ11;S100A1;FXYD6;NOS1;ATP1A1	6	0.0645161	3
GO:0043549	regulation of kinase activity	6/94	0.0049335	4.06971	21.6171	EPHA5;FLT1;EPHA10;FLT3;LMO4;EPHA3	6	0.0638298	2
GO:0045761	regulation of adenylate cyclase activity	3/22	0.00561691	9.37208	48.5659	GRM2;CACNA1C;CRHR1	3	0.136364	2
GO:0019228	neuronal action potential	3/22	0.00561691	9.37208	48.5659	CACNA1I;SCN3A;CACNA1G	3	0.136364	2
GO:0018108	peptidyl-tyrosine phosphorylation	5/69	0.00591985	4.65473	23.8762	FLT1;PKDCC;FLT3;ABI3;EPHA3	5	0.0724638	1
GO:0009312	oligosaccharide biosynthetic process	3/23	0.00638051	8.90302	45.0004	B3GALT2;FUT2;ST3GAL3	3	0.130435	1
GO:0043410	positive regulation of MAPK cascade	11/274	0.00658688	2.51248	12.6194	NOTCH2;SEMA7A;FLT1;BMPER;ANGPT1;FLT3;HTR2C;ACKR3;ADRA1D;NPNT;MTURN	11	0.040146	2
GO:0001508	action potential	4/45	0.00664118	5.80192	29.0935	CACNA1I;SCN3A;KCNJ2;CACNA1G	4	0.0888889	2
GO:0001578	microtubule bundle formation	4/45	0.00664118	5.80192	29.0935	RSPH4A;TTLL3;MTCL1;PLK1	4	0.0888889	3
GO:0014032	neural crest cell development	4/45	0.00664118	5.80192	29.0935	SEMA5A;SEMA7A;SHH;SEMA3D	4	0.0888889	3
GO:0007188	adenylate cyclase-modulating G protein-coupled receptor signaling pathway	8/165	0.00664667	3.04935	15.2884	ADGRG1;GPR12;HTR1F;PTGER3;OPRK1;ADRA1D;DRD1;CRHR1	8	0.0484848	2
GO:0009154	purine ribonucleotide catabolic process	3/24	0.00720297	8.47864	41.8273	NT5E;NT5C1A;NUDT18	3	0.125	1
GO:0048841	regulation of axon extension involved in axon guidance	3/24	0.00720297	8.47864	41.8273	SEMA5A;SEMA7A;SEMA3D	3	0.125	3
GO:0016051	carbohydrate biosynthetic process	3/24	0.00720297	8.47864	41.8273	B3GALT2;FUT2;ST3GAL3	3	0.125	1
GO:0051336	regulation of hydrolase activity	5/73	0.00749759	4.38003	21.4322	EPHA5;NOS1;PLXNC1;BVES;EPHA3	5	0.0684932	2
GO:0051963	regulation of synapse assembly	4/47	0.0077465	5.5315	26.8859	CUX2;DLG5;WNT7A;GPC4	4	0.0851064	3
GO:0098916	anterograde trans-synaptic signaling	10/244	0.00816655	2.56305	12.3224	GABRQ;HTR1F;NPY;HTR2C;OPRK1;MYCBPAP;NPTX1;CACNA1E;NTSR1;NRGN	10	0.0409836	2
GO:0070374	positive regulation of ERK1 and ERK2 cascade	8/172	0.00845219	2.91815	13.9293	NOTCH2;SEMA7A;BMPER;ANGPT1;HTR2C;ACKR3;NPNT;MTURN	8	0.0465116	2
GO:0006023	aminoglycan biosynthetic process	4/49	0.0089663	5.28512	24.9155	B3GALT2;PXYLP1;GPC4;HS3ST1	4	0.0816327	1
GO:1903131	mononuclear cell differentiation	3/26	0.00902855	7.74058	36.4377	FLT3;PIR;PPARG	3	0.115385	3
GO:0050804	modulation of chemical synaptic transmission	6/109	0.00998193	3.47437	16.0063	USP46;GRM2;MCTP1;TMEM108;NPTX1;CNTNAP4	6	0.0550459	2
GO:0098815	modulation of excitatory postsynaptic potential	3/27	0.0100334	7.41767	34.1349	CUX2;TMEM108;WNT7A	3	0.111111	2
GO:2000352	negative regulation of endothelial cell apoptotic process	3/27	0.0100334	7.41767	34.1349	SEMA5A;ANGPT1;NDNF	3	0.111111	2
GO:0009967	positive regulation of signal transduction	10/252	0.0101082	2.4773	11.3817	SMOC2;SHH;CUX2;LMO3;DLG5;RSPO2;TMEM108;RSPO3;WNT7A;SULF1	10	0.0396825	2
GO:0001667	ameboidal-type cell migration	4/52	0.0110202	4.95404	22.3329	SEMA5A;SHH;SEMA7A;SEMA3D	4	0.0769231	2
GO:0030514	negative regulation of BMP signaling pathway	4/52	0.0110202	4.95404	22.3329	GREM2;BMPER;PPARG;FSTL1	4	0.0769231	2
GO:0072348	sulfur compound transport	3/28	0.0111007	7.1206	32.048	SLC26A7;SLC26A11;SLC26A4	3	0.107143	2
GO:0051965	positive regulation of synapse assembly	3/28	0.0111007	7.1206	32.048	CUX2;DLG5;WNT7A	3	0.107143	3
GO:0034394	protein localization to cell surface	3/28	0.0111007	7.1206	32.048	GGA2;ANGPT1;FBLN5	3	0.107143	2
GO:0044272	sulfur compound biosynthetic process	6/113	0.0117895	3.3438	14.8483	ANGPT1;DSEL;DSE;ST3GAL1;ST3GAL3;CHST3	6	0.0530973	1
GO:0033674	positive regulation of kinase activity	6/114	0.0122751	3.31267	14.5763	EPHA5;FLT1;EPHA10;LMO4;FLT3;EPHA3	6	0.0526316	2
GO:0030198	extracellular matrix organization	11/300	0.0124635	2.28338	10.0125	SMOC2;COL15A1;VCAM1;COL11A1;ITGA1;COL4A5;COL6A3;NDNF;NPNT;NID1;FBLN5	11	0.0366667	3
GO:0045766	positive regulation of angiogenesis	6/116	0.0132884	3.25211	14.0519	SEMA5A;SMOC2;FLT1;BMPER;S100A1;VEGFC	6	0.0517241	3
GO:1903779	regulation of cardiac conduction	4/55	0.0133551	4.66191	20.1202	KCNJ11;FXYD6;NOS1;ATP1A1	4	0.0727273	2
GO:0030517	negative regulation of axon extension	3/31	0.014683	6.35671	26.8321	SEMA5A;SEMA7A;SEMA3D	3	0.0967742	3
GO:0035025	positive regulation of Rho protein signal transduction	3/31	0.014683	6.35671	26.8321	NET1;ADGRG1;SYNPO2L	3	0.0967742	2
GO:0048523	negative regulation of cellular process	17/566	0.0148055	1.8674	7.8669	SEMA5A;PBRM1;ANGPT1;ITGA1;WFDC1;OSGIN2;DCBLD2;ING4;TGFBR3;SHH;ADGRG1;REST;FRZB;DLG5;PLXNC1;NOS1;INSM1	17	0.0300353	2
GO:0007517	muscle organ development	4/58	0.0159829	4.40224	18.2087	CHODL;SGCD;COL6A3;BVES	4	0.0689655	3
GO:0010976	positive regulation of neuron projection development	5/88	0.0159972	3.58571	14.8281	CUX2;DPYSL3;NDNF;TOX;EPHA3	5	0.0568182	3
GO:0002062	chondrocyte differentiation	3/32	0.0160055	6.1372	25.3763	NFIB;WNT7A;SULF1	3	0.09375	3
GO:0002244	hematopoietic progenitor cell differentiation	3/32	0.0160055	6.1372	25.3763	SHH;FLT1;FLT3	3	0.09375	3
GO:0050922	negative regulation of chemotaxis	3/32	0.0160055	6.1372	25.3763	SEMA5A;SEMA7A;SEMA3D	3	0.09375	2
GO:0019932	second-messenger-mediated signaling	5/89	0.0167248	3.54284	14.4933	MCTP1;P2RX4;ACKR3;NDNF;NOS1	5	0.0561798	2
GO:1990138	neuron projection extension	3/33	0.0173927	5.93233	24.036	SEMA5A;MAP1B;TMEM108	3	0.0909091	3
GO:0009966	regulation of signal transduction	8/198	0.0184605	2.51547	10.042	SEMA5A;RGS4;GNG7;TMEM108;RSPO3;RGS12;SULF1;ESR1	8	0.040404	2
GO:0016266	O-glycan processing	4/61	0.0189142	4.16991	16.5455	GALNT15;B3GNT5;ST3GAL1;ST3GAL3	4	0.0655738	1
GO:0001936	regulation of endothelial cell proliferation	5/92	0.0190386	3.42015	13.5482	SEMA5A;ANGPT1;VEGFC;FUT2;SULF1	5	0.0543478	2
GO:0045926	negative regulation of growth	6/126	0.0192406	2.97957	11.7715	NOTCH2;ING4;FRZB;WFDC1;OSGIN2;DCBLD2	6	0.047619	2
GO:0071526	semaphorin-plexin signaling pathway	3/35	0.0203625	5.56099	21.6548	SEMA5A;SEMA7A;SEMA3D	3	0.0857143	2
GO:0030097	hemopoiesis	5/94	0.0206926	3.34295	12.9639	TGFBR3;NOTCH2;FLT1;FLT3;TOX	5	0.0531915	3
GO:0046579	positive regulation of Ras protein signal transduction	4/63	0.0210414	4.02815	15.5537	NOTCH2;NET1;ADGRG1;SYNPO2L	4	0.0634921	2
GO:0007190	activation of adenylate cyclase activity	3/36	0.0219452	5.3922	20.5939	ADRB1;DRD1;CRHR1	3	0.0833333	2
GO:0030326	embryonic limb morphogenesis	3/36	0.0219452	5.3922	20.5939	SHH;WNT7A;CACNA1C	3	0.0833333	3
GO:0002028	regulation of sodium ion transport	3/36	0.0219452	5.3922	20.5939	P2RX4;ATP1A1;NOS1	3	0.0833333	2
GO:0030501	positive regulation of bone mineralization	3/36	0.0219452	5.3922	20.5939	KL;PKDCC;ISG15	3	0.0833333	3
GO:0006486	protein glycosylation	6/130	0.0220611	2.88287	10.9951	B3GALT2;B3GNT5;MAN1C1;FUT2;ST3GAL1;ST3GAL3	6	0.0461538	1
GO:0007187	G protein-coupled receptor signaling pathway, coupled to cyclic nucleotide second messenger	4/65	0.0233096	3.89568	14.6434	HTR1F;NPY;HTR2C;DRD1	4	0.0615385	2
GO:0001937	negative regulation of endothelial cell proliferation	3/37	0.0235933	5.23334	19.6082	FLT1;PPARG;SULF1	3	0.0810811	2
GO:1904036	negative regulation of epithelial cell apoptotic process	3/37	0.0235933	5.23334	19.6082	SEMA5A;ANGPT1;NDNF	3	0.0810811	2
GO:0030155	regulation of cell adhesion	6/133	0.0243508	2.81434	10.4558	SEMA5A;FRMD5;ADGRG1;ANGPT1;PLXNC1;FUT2	6	0.0451128	2
GO:0086091	regulation of heart rate by cardiac conduction	3/39	0.0270852	4.94209	17.8349	CACNA1C;KCNJ2;CACNA1G	3	0.0769231	2
GO:0050999	regulation of nitric-oxide synthase activity	3/39	0.0270852	4.94209	17.8349	GCH1;S100A1;NOSTRIN	3	0.0769231	2
GO:0019722	calcium-mediated signaling	5/102	0.0282351	3.06599	10.937	VCAM1;MCTP1;P2RX4;ACKR3;CACNA1C	5	0.0490196	2
GO:0045778	positive regulation of ossification	3/40	0.0289289	4.80828	17.0353	KL;PKDCC;ISG15	3	0.075	3
GO:0007167	enzyme linked receptor protein signaling pathway	6/140	0.0302979	2.66636	9.32341	EPHA5;FLT1;EPHA10;FLT3;SLA;EPHA3	6	0.0428571	2
GO:0050796	regulation of insulin secretion	5/104	0.0303596	3.00375	10.497	EPHA5;REST;KCNJ11;CACNA1C;CACNA1E	5	0.0480769	2
GO:0070169	positive regulation of biomineral tissue development	3/41	0.0308373	4.68151	16.2871	KL;PKDCC;ISG15	3	0.0731707	3
GO:1990573	potassium ion import across plasma membrane	3/42	0.0328104	4.56124	15.5858	KCNJ11;ATP1A1;KCNJ2	3	0.0714286	2
GO:0007268	chemical synaptic transmission	10/306	0.0335598	2.01973	6.85582	GABRQ;HTR1F;NPY;HTR2C;OPRK1;MYCBPAP;NPTX1;CACNA1E;NTSR1;NRGN	10	0.0326797	2
GO:0035023	regulation of Rho protein signal transduction	4/73	0.0338268	3.4426	11.6584	NET1;ADGRG1;SYNPO2L;STARD8	4	0.0547945	2
GO:0032480	negative regulation of type I interferon production	3/43	0.0348477	4.44698	14.9275	IFIH1;UBA7;ISG15	3	0.0697674	3
GO:0050772	positive regulation of axonogenesis	3/43	0.0348477	4.44698	14.9275	CHODL;SEMA7A;PLXNC1	3	0.0697674	3
GO:0090276	regulation of peptide hormone secretion	4/74	0.0353064	3.39325	11.346	KCNJ11;HTR2C;CACNA1C;CACNA1E	4	0.0540541	2
GO:2000351	regulation of endothelial cell apoptotic process	3/44	0.036949	4.33829	14.3086	SEMA5A;ANGPT1;NDNF	3	0.0681818	2
GO:0031032	actomyosin structure organization	4/76	0.0383767	3.29865	10.7546	FRMD5;SYNPO2L;TNNT1;EPB41L3	4	0.0526316	3
GO:0030510	regulation of BMP signaling pathway	4/76	0.0383767	3.29865	10.7546	BMPER;PPARG;SULF1;FSTL1	4	0.0526316	2
GO:1902893	regulation of pri-miRNA transcription by RNA polymerase II	3/45	0.0391139	4.23479	13.7261	REST;NFIB;PPARG	3	0.0666667	1
GO:0050921	positive regulation of chemotaxis	3/45	0.0391139	4.23479	13.7261	SEMA5A;SMOC2;P2RX4	3	0.0666667	2
GO:0051962	positive regulation of nervous system development	3/45	0.0391139	4.23479	13.7261	CUX2;DLG5;WNT7A	3	0.0666667	3
GO:0098659	inorganic cation import across plasma membrane	4/77	0.0399673	3.2533	10.4746	SLC9A5;KCNJ11;ATP1A1;KCNJ2	4	0.0519481	2
GO:0048584	positive regulation of response to stimulus	3/46	0.0413419	4.13609	13.1771	IFIH1;RSAD2;ABI3	3	0.0652174	2
GO:0001837	epithelial to mesenchymal transition	3/47	0.0436325	4.04188	12.659	TGFBR3;FOXF2;DLG5	3	0.0638298	3
GO:0006816	calcium ion transport	5/115	0.0438202	2.70185	8.45047	CACNA1I;P2RX4;CACNA1C;CACNA1E;CACNA1G	5	0.0434783	2
GO:0045598	regulation of fat cell differentiation	4/80	0.0449618	3.1244	9.69172	FRZB;LMO3;RORC;PPARG	4	0.05	3
GO:0045785	positive regulation of cell adhesion	4/80	0.0449618	3.1244	9.69172	FRMD5;ADGRG1;NDNF;NPNT	4	0.05	2
GO:0045595	regulation of cell differentiation	6/156	0.047248	2.38	7.26458	SHH;REST;RORC;CDK5RAP1;INSM1;EPHA3	6	0.0384615	3
GO:1902652	secondary alcohol metabolic process	3/49	0.0483994	3.86576	11.7065	SQLE;IDH1;LCAT	3	0.0612245	1
GO:0009311	oligosaccharide metabolic process	3/49	0.0483994	3.86576	11.7065	B3GALT2;FUT2;ST3GAL3	3	0.0612245	1
GO:0048013	ephrin receptor signaling pathway	4/82	0.0484765	3.04398	9.21314	EPHA5;EPHA10;AP2A2;EPHA3	4	0.0487805	2

## Sheet: GOBP.CUMS
Term	Description	Ratio	P.value	Odds.Ratio	Combined.Score	Genes	Overlap	Ratio.value	Cluster
GO:0006464	cellular protein modification process	116/1025	1.33903e-05	1.57884	17.7161	CHRM3;PGAP1;RAB3A;MPI;PLOD2;TBK1;PPP2R1A;CHEK1;PDK4;PDK3;FBXO6;CCN1;LARGE1;FBXO9;TGM2;SHISA5;PRPF4B;PRKCA;LMO7;FBXO10;PDIA6;PSME3;MXRA8;SIK3;SIK2;TRIB1;PHPT1;UBA52;CDKL1;RPN1;PIK3R4;MTMR4;FUT2;STK4;MTMR7;HSP90B1;SOCS2;STK38;PENK;ST3GAL4;IGFBP7;FN3K;SRPK2;TIPARP;PLK2;FUCA2;TMEM132A;FN1;B3GALT4;OGA;BTBD6;CLK3;CDK9;PTPRB;BMP2;CDK6;GGCX;UBLCP1;CALU;STT3A;MAN2B1;COPS8;FBN1;UBE2M;CDK16;PIGS;PRKAG1;PTPN…	116	0.113171	1
GO:0042407	cristae formation	10/28	2.50135e-05	6.72022	71.2081	DMAC2L;APOO;SAMM50;ATP5PB;ATP5MC2;DNAJC11;ATP5MC3;SPG7;ATP5F1C;ATP5MF	10	0.357143	2
GO:0045930	negative regulation of mitotic cell cycle	13/48	4.61143e-05	4.49765	44.9063	BTG3;BTG2;FOXC1;FZD3;PLK2;ZFP36L1;BRINP1;RGCC;BCL6;CHEK1;NABP1;BRINP3;PTPN3	13	0.270833	4
GO:0007007	inner mitochondrial membrane organization	13/49	5.83924e-05	4.37248	42.6244	TOMM70;DMAC2L;ATP5PB;MTX3;ATP5MC2;DNAJC11;ATP5MC3;SPG7;ATP5F1C;APOO;SAMM50;OPA1;ATP5MF	13	0.265306	2
GO:0019646	aerobic electron transport chain	16/70	6.25181e-05	3.59125	34.7635	COX8A;NDUFA7;NDUFB7;NDUFB5;NDUFA4;NDUFB4;NDUFA3;NDUFA10;NDUFB2;AFG1L;NDUFC1;COX6A1;COX6C;COX7C;NDUFS5;NDUFS3	16	0.228571	1
GO:0048048	embryonic eye morphogenesis	6/11	6.67407e-05	14.4879	139.297	FBN2;ALDH1A3;RARG;KDM2B;FBN1;LRP6	6	0.545455	4
GO:0043266	regulation of potassium ion transport	10/31	6.83265e-05	5.75925	55.2382	KCNH2;KCNIP1;ACTN2;PTK2B;KCNA5;ANK2;KCNAB1;KCNAB2;KCNAB3;ADRA2A	10	0.322581	5
GO:0042775	mitochondrial ATP synthesis coupled electron transport	16/71	7.50213e-05	3.52576	33.4868	COX8A;NDUFA7;NDUFB7;NDUFB5;NDUFA4;NDUFB4;NDUFA3;NDUFA10;NDUFB2;AFG1L;NDUFC1;COX6A1;COX6C;COX7C;NDUFS5;NDUFS3	16	0.225352	1
GO:0043268	positive regulation of potassium ion transport	11/38	9.08438e-05	4.92899	45.871	KCNH2;GABBR1;KCNJ6;KCNJ10;ACTN2;KCNMB4;KCNN1;KCNJ16;ANK2;ADRA2A;KCNJ3	11	0.289474	5
GO:0007006	mitochondrial membrane organization	10/32	9.25851e-05	5.49717	51.0543	APOO;SAMM50;OPA1;BNIP3;MTX3;MFN1;DNAJC11;SPG7;BAK1;SLC25A5	10	0.3125	2
GO:0045787	positive regulation of cell cycle	15/66	0.000112637	3.56308	32.3932	ANKRD17;SRPK2;CITED2;USP2;ASNS;PRKCA;LRP6;RGCC;TAL1;CCPG1;CHEK1;MDM2;PKN2;CALR;EIF4E	15	0.227273	4
GO:0006120	mitochondrial electron transport, NADH to ubiquinone	11/39	0.000117822	4.75269	42.9945	NDUFA7;NDUFB7;NDUFB5;NDUFA4;NDUFB4;NDUFA3;NDUFS5;NDUFA10;NDUFB2;NDUFS3;NDUFC1	11	0.282051	1
GO:0032412	regulation of ion transmembrane transporter activity	11/39	0.000117822	4.75269	42.9945	CHRM3;TRPC6;HOMER1;RIPK1;ANK2;FXYD6;UTRN;FGF12;SCN1B;YWHAH;PTPN3	11	0.282051	5
GO:0006813	potassium ion transport	22/122	0.000138698	2.67039	23.7216	KCNH2;SLC24A2;KCNG2;KCNJ6;KCNJ10;KCNK10;KCND2;KCNC2;ABCC8;KCNA1;KCNJ16;KCNAB1;KCNA5;KCNAB2;KCNAB3;KCNS1;KCNQ2;KCNMB4;KCNN1;KCNQ5;KCNJ3;HCN1	22	0.180328	5
GO:0048024	regulation of mRNA splicing, via spliceosome	18/90	0.000142581	3.03115	26.8426	DDX17;SF3B4;SRPK2;RBFOX1;MBNL2;RBFOX2;YTHDC1;CIRBP;HNRNPU;PTBP1;REST;TRA2A;SRSF4;RNPS1;METTL16;SRSF6;SRSF7;RBM11	18	0.2	1
GO:1902653	secondary alcohol biosynthetic process	10/34	0.000163349	5.03852	43.934	FDPS;PLPP6;SQLE;INSIG2;PMVK;CYP51A1;DHCR24;HMGCR;LBR;LSS	10	0.294118	1
GO:0042981	regulation of apoptotic process	84/742	0.00020469	1.56667	13.3073	ITGB1;USP36;RARG;TRIO;TFRC;FLT3;CITED2;SRA1;HSPB1;IKBKB;AKAP13;BABAM2;OPA1;SIX4;CASP6;CFL1;RACK1;KDR;CTSH;SOX9;JAK2;CTSD;TGM2;TOMM70;KLF11;USP47;DAXX;GRID2;PRMT2;ACTN2;FBXO10;SIRT1;ATAD3A;TOPORS;DNAJC3;HCK;TOX3;ARHGAP10;ARHGEF9;SFRP2;IRF3;RASA1;ARHGEF3;UBA52;ATF4;ARHGEF26;PIK3R1;STK4;LRP8;THBS1;RTN4;HSP90B1;PRDX3;NEUROD1;SOCS2;PNMA1;BNIP2;PTK2B;RIPK1;BAK1;TAF9B;WNT10B;JUN;EGLN3;ANGPT1;CBX4;HSPA5;…	84	0.113208	3
GO:0006695	cholesterol biosynthetic process	10/35	0.000213079	4.83672	40.8889	FDPS;PLPP6;SQLE;INSIG2;PMVK;CYP51A1;DHCR24;HMGCR;LBR;LSS	10	0.285714	1
GO:0043549	regulation of kinase activity	18/94	0.000252802	2.87099	23.7801	VAC14;EPHA7;FLT1;LDB1;FLT3;NTRK3;TIE1;HNRNPU;EMP2;LDB2;PRDX3;ERBB2;KDR;NBN;MAPT;TEK;EPHA3;DDR2	18	0.191489	1
GO:0045595	regulation of cell differentiation	25/156	0.000346688	2.31712	18.4607	SRF;ZFP36L1;NEUROD1;PTBP1;PPP2R1A;FLOT2;YWHAG;HES5;CDK5RAP2;YWHAH;DDX17;SUZ12;NR1D2;EMP2;NR1D1;KLF4;CDK9;REST;CDK6;BCL6;ID2;BCL6B;EPHA3;ATF4;CDK5R1	25	0.160256	4
GO:0010467	gene expression	46/356	0.000351321	1.80925	14.3904	HBS1L;MRPS15;SMG1;RNASEL;YTHDC1;DDX25;MRPS33;RPL12;SRBD1;HNRNPU;MRPL36;RRBP1;ADARB1;AAAS;RPL10A;NUP160;PABPN1;EPC1;POLR2F;RPL15;POLR2H;RPS10;EIF4E;RPL19;DDX17;UPF2;CPSF4;RNGTT;RBPMS;GALNT2;PABPC4;HARS2;MRPS6;CDC40;TOPORS;RPS25;MED20;HNRNPA2B1;DNAJB11;RNPS1;SRSF4;HNRNPH3;SRSF6;RPL28;SRSF7;RBMS2	46	0.129213	1
GO:0032785	negative regulation of DNA-templated transcription, elongation	6/14	0.000354638	9.05347	71.9245	HEXIM1;TCERG1;RNF8;SUPT4H1;HNRNPU;NELFE	6	0.428571	1
GO:0030334	regulation of cell migration	51/408	0.00038529	1.74317	13.7039	ITGB1;ROBO4;FLT1;LDB1;CITED2;FAM107A;PTPRJ;ADARB1;LDLRAD4;LDB2;CDH5;PPP3CA;RACK1;KDR;CTSH;CCN1;APPL1;SUN2;PRKCA;ADRA2A;CLDN5;MMP14;SFRP2;SMO;SPATA13;CAMK2B;MACF1;SEMA3D;STC1;NEDD9;PRKX;THBS1;PAK1;PLXNA2;PTK2B;STX4;SRGAP3;SASH1;SEMA4A;CARMIL2;HSPA5;NTRK3;SEMA4C;SEMA4F;LAMB1;CYRIB;IGSF10;AFDN;BMP2;AMOTL1;FERMT2	51	0.125	5
GO:0033108	mitochondrial respiratory chain complex assembly	17/90	0.000438905	2.82152	21.8138	COX19;NDUFA7;NDUFB7;PET100;NDUFB5;NUBPL;NDUFB4;NDUFA3;NDUFA10;NDUFB2;NDUFC1;SAMM50;SDHAF3;NDUFS5;NDUFS3;NDUFAF3;SDHAF4	17	0.188889	2
GO:0000122	negative regulation of transcription by RNA polymerase II	77/684	0.000439063	1.55374	12.0117	TCERG1;SUV39H2;RARG;LDB1;CITED2;BHLHE41;ZBTB21;HNRNPU;UBE2D1;LDB2;N4BP2L2;SIN3B;EPC1;ZNF688;SOX9;KLF11;ZGPAT;NCOA5;PARP1;KDM2B;USP2;ARID5A;SOX11;FOXP4;DUSP26;PARP9;SIRT1;NCOR2;RIPPLY2;NFX1;CRY1;ZNF558;LCOR;ZNF436;UBA52;JDP2;ATF4;MCPH1;HDAC5;FOXC1;NFIX;SRF;CREM;GLIS3;SUPT4H1;ZNF25;MACROH2A1;PHF21A;PURA;CUX1;NFIL3;DEAF1;NRIP1;TAF9B;MAP2K5;HES5;HEXIM1;SPEN;JUN;CBX4;GADD45A;RITA1;IRF2BP2;NR1D2;NR1D1;…	77	0.112573	1
GO:0016126	sterol biosynthetic process	10/38	0.000443986	4.3178	33.3322	FDPS;PLPP6;SQLE;INSIG2;PMVK;CYP51A1;DHCR24;HMGCR;LBR;LSS	10	0.263158	1
GO:0006366	transcription by RNA polymerase II	42/320	0.000448911	1.84037	14.1869	HDAC5;RARG;NFIX;RNMT;SRRT;SUPT4H1;GLIS3;HDAC7;SCAF8;PABPN1;DEAF1;LEO1;PAPOLA;POLR2F;ELOB;RPRD1B;E2F3;NRBF2;POLR2H;TAF9B;RXRG;NELFE;GTF2I;CPSF4;RNGTT;PARP1;NR1D2;GTF2H1;ESRRG;NR1D1;NCOR2;CDK9;NR4A1;NR6A1;NR4A3;NFX1;MED20;NABP1;TAF4B;MAML3;INTS6;ATF4	42	0.13125	1
GO:0046985	positive regulation of hemoglobin biosynthetic process	4/6	0.000457085	24.1189	185.49	LDB1;SLC6A9;PRMT1;KLF4	4	0.666667	1
GO:0007346	regulation of mitotic cell cycle	27/178	0.000505223	2.17154	16.4831	BTG3;BTG2;FOXC1;HNRNPU;UBE2D1;SRA1;IQGAP1;BRINP1;PSMB3;RCC1;BRINP3;EIF4E;USP2;ASNS;PRKCA;SIRT1;PSMB8;CDK9;CYLD;PSMA3;TAL1;PSME3;MDM2;CKS2;PKN2;ANAPC2;PTPN3	27	0.151685	4
GO:0007193	adenylate cyclase-inhibiting G protein-coupled receptor signaling pathway	13/60	0.000520367	3.34714	25.3076	P2RY12;CHRM3;GABBR1;ADCY4;GNAI3;HTR1A;HTR1B;MCHR1;ADRA2A;ADCY6;AKAP12;ADCY9;GNAL	13	0.216667	5
GO:0072359	circulatory system development	21/126	0.000588557	2.42536	18.0395	KDM6B;MKKS;FOXC1;CXADR;CITED2;SRF;NTRK3;FN1;LDB3;HSPG2;WDR11;CDH5;AKAP13;BMP2;ID2;RBM20;SOX9;TEK;FGF12;FBN1;KDM6A	21	0.166667	4
GO:1901379	regulation of potassium ion transmembrane transport	12/54	0.000663581	3.45615	25.2916	KCNH2;GABBR1;KCNJ6;KCNJ10;KCNIP1;KCNMB4;KCNN1;KCNJ16;KCNAB1;KCNAB2;KCNAB3;KCNJ3	12	0.222222	5
GO:0034243	regulation of transcription elongation from RNA polymerase II promoter	8/27	0.000699074	5.08627	36.9556	HEXIM1;TCERG1;LDB1;RNF8;SUPT4H1;LEO1;HNRNPU;NELFE	8	0.296296	1
GO:0019511	peptidyl-proline hydroxylation	5/11	0.000825229	10.0539	71.3813	CRTAP;EGLN3;P4HA1;P4HB;P4HTM	5	0.454545	1
GO:1904064	positive regulation of cation transmembrane transport	10/41	0.000852434	3.89931	27.5581	KCNH2;GABBR1;KCNJ6;KCNJ10;ACTN2;KCNMB4;KCNN1;KCNJ16;ANK2;KCNJ3	10	0.243902	5
GO:0045765	regulation of angiogenesis	29/203	0.000865863	2.02424	14.2745	ITGB1;FOXC1;FLT1;HSPB1;THBS1;HK2;CDH5;ADGRA2;ADAMTS1;ERBB2;KDR;PGK1;CTSH;EMILIN1;CNMD;SASH1;GTF2I;CEMIP2;SERPINF1;TIE1;PRKCA;EMP2;KLF4;HSPG2;SIRT1;CLDN5;SFRP2;RGCC;TEK	29	0.142857	4
GO:0080090	regulation of primary metabolic process	21/130	0.000895575	2.33585	16.3931	FDPS;NFYB;CYP51A1;NR1D2;EDF1;NR1D1;HMGCR;MACROH2A1;LSS;OAZ2;PSMB8;HELZ2;NCOR2;SQLE;PSMA3;SIN3B;PSMB3;PSME3;ID2;PMVK;LDLR	21	0.161538	1
GO:0071805	potassium ion transmembrane transport	22/139	0.000905807	2.28027	15.9771	KCNH2;SLC24A2;KCNG2;KCNJ6;KCNJ10;KCNK10;KCND2;KCNC2;ABCC8;KCNA1;KCNJ16;KCNAB1;KCNA5;KCNAB2;KCNAB3;KCNS1;KCNQ2;KCNN1;KCNQ5;SLC12A8;KCNJ3;HCN1	22	0.158273	5
GO:1902305	regulation of sodium ion transmembrane transport	8/28	0.000913481	4.8317	33.8134	FXYD6;SCN5A;COMMD1;UTRN;FGF12;SCN1B;YWHAH;PTPN3	8	0.285714	5
GO:0046984	regulation of hemoglobin biosynthetic process	4/7	0.00100156	16.0784	111.04	LDB1;SLC6A9;PRMT1;KLF4	4	0.571429	1
GO:0045785	positive regulation of cell adhesion	15/80	0.00100976	2.79352	19.2698	P2RY12;CITED2;PTPRJ;PRKCA;DUSP26;FBLN2;PPP3CA;AFDN;ADGRG1;SFRP2;ERBB2;STX4;P4HB;JAK2;TGM2	15	0.1875	4
GO:0033674	positive regulation of kinase activity	19/114	0.00105076	2.42348	16.6208	VAC14;DAXX;EPHA7;FLT1;FLT3;NTRK3;TIE1;PRKAG1;IQGAP1;ALS2;ERBB2;KDR;PTK2B;NBN;MAPT;TEK;CCN1;EPHA3;DDR2	19	0.166667	1
GO:0043062	extracellular structure organization	30/216	0.00113073	1.95895	13.2913	FBN2;ITGB1;LAMC3;ELN;ITGB3;PAPLN;ICAM2;NID1;THBS1;FBLN5;THSD4;ADAMTS3;ADAMTS1;ADAMTS17;KDR;POSTN;ITGA4;FN1;LAMB1;HSPG2;MMP14;MMP16;COL5A3;COL5A2;GFOD2;COL8A1;COL4A5;DDR2;FBN1;ITGA9	30	0.138889	2
GO:0042776	mitochondrial ATP synthesis coupled proton transport	6/17	0.00119596	6.58327	44.2976	DMAC2L;ATP5PB;ATP5MC2;ATP5MC3;ATP5F1C;ATP5MF	6	0.352941	1
GO:0006123	mitochondrial electron transport, cytochrome c to oxygen	6/17	0.00119596	6.58327	44.2976	COX8A;NDUFA4;AFG1L;COX6A1;COX6C;COX7C	6	0.352941	1
GO:0030155	regulation of cell adhesion	21/133	0.00120837	2.27291	15.2705	EPHA7;ANGPT1;DUSP1;PRKCA;FBLN1;PTPRJ;PRKX;FUT2;DUSP26;PPP3CA;ADGRG1;PPP2R1A;RASA1;ARHGDIB;ERBB2;PLXNA2;LPXN;PTK2B;STX4;P4HB;TGM2	21	0.157895	4
GO:0045229	external encapsulating structure organization	30/217	0.00121809	1.94837	13.0745	FBN2;ITGB1;LAMC3;ELN;ITGB3;PAPLN;ICAM2;NID1;THBS1;FBLN5;THSD4;ADAMTS3;ADAMTS1;ADAMTS17;KDR;POSTN;ITGA4;FN1;LAMB1;HSPG2;MMP14;MMP16;COL5A3;COL5A2;GFOD2;COL8A1;COL4A5;DDR2;FBN1;ITGA9	30	0.138249	2
GO:0051726	regulation of cell cycle	38/296	0.00123746	1.79135	11.9925	ANKRD17;UHRF2;CITED2;HNRNPU;SRA1;ADARB1;IQGAP1;THBS1;LRP6;BRINP1;CHEK1;RACK1;RPRD1B;SOX9;NBN;JUNB;SRPK2;JUN;GADD45A;DUSP1;DHCR24;SIRT1;GADD45G;CDK9;CYLD;RNF167;BOP1;NR4A1;BMP2;CDK6;RGCC;MYBBP1A;CCPG1;ID2;CKS2;MDM2;CALR;TARDBP	38	0.128378	4
GO:0032981	mitochondrial respiratory chain complex I assembly	12/58	0.00129743	3.15493	20.972	NDUFA7;NDUFB7;NDUFB5;NUBPL;NDUFS5;NDUFB4;NDUFA3;NDUFA10;NDUFS3;NDUFB2;NDUFAF3;NDUFC1	12	0.206897	2
GO:0010257	NADH dehydrogenase complex assembly	12/58	0.00129743	3.15493	20.972	NDUFA7;NDUFB7;NDUFB5;NUBPL;NDUFS5;NDUFB4;NDUFA3;NDUFA10;NDUFS3;NDUFB2;NDUFAF3;NDUFC1	12	0.206897	2
GO:0034244	negative regulation of transcription elongation from RNA polymerase II promoter	5/12	0.00132554	8.61718	57.0969	HEXIM1;TCERG1;RNF8;HNRNPU;NELFE	5	0.416667	1
GO:0045892	negative regulation of transcription, DNA-templated	98/948	0.00146938	1.4133	9.21881	TCERG1;ZBTB21;UBE2D1;HNRNPU;SCMH1;EPC1;ZNF688;SOX9;DAXX;RBFOX2;ZGPAT;KDM2B;USP2;ARID5A;SOX11;ZNF12;FOXP4;SFRP2;ZNF558;ZNF436;UBA52;ATF4;L3MBTL3;CREM;GLIS3;SUPT4H1;ZNF25;MACROH2A1;PHF21A;MBTD1;DEAF1;MAP2K5;HEXIM1;JUN;CBX4;GADD45A;CBX3;RITA1;IRF2BP2;NR1D2;NR1D1;SMARCA2;PHC3;BMP2;GCLC;NR4A3;BCL6;ID2;MDM2;CALR;RCOR2;SUV39H2;RARG;LDB1;CITED2;BHLHE41;RSF1;LDB2;N4BP2L2;SIN3B;SIX4;KLF11;USP47;NCOA5;PARP1…	98	0.103376	1
GO:0030335	positive regulation of cell migration	35/269	0.00149597	1.81791	11.8254	ITGB1;FLT1;SEMA3D;FAM107A;NEDD9;THBS1;RTN4;PPP3CA;CDH5;PAK1;KDR;PLCG2;RACK1;CTSH;PTK2B;STX4;SOX9;CCN1;SUN2;SEMA4A;CARMIL2;HSPA5;NTRK3;SEMA4C;FN1;PRKCA;LAMB1;SEMA4F;ADRA2A;MMP14;BMP2;SMO;PLAA;FERMT2;DDR2	35	0.130112	5
GO:1904062	regulation of cation transmembrane transport	8/30	0.00149891	4.39197	28.5611	KCNH2;HOMER1;KCNIP1;KCNAB1;SCN5A;KCNAB2;KCNAB3;FGF12	8	0.266667	5
GO:1901381	positive regulation of potassium ion transmembrane transport	10/44	0.00152822	3.55468	23.0473	KCNH2;GABBR1;KCNJ6;KCNJ10;ACTN2;KCNMB4;KCNN1;KCNJ16;ANK2;KCNJ3	10	0.227273	5
GO:0034660	ncRNA metabolic process	9/37	0.0015668	3.88347	25.0823	TDRKH;DDX17;KHSRP;XPO5;PARN;DGCR8;MAPT;DTD1;DTD2	9	0.243243	1
GO:2000147	positive regulation of cell motility	30/221	0.00162883	1.90715	12.2437	ITGB1;FLT1;SEMA3D;FAM107A;NEDD9;THBS1;PPP3CA;CDH5;PAK1;KDR;RACK1;CTSH;PTK2B;STX4;CCN1;SUN2;SEMA4A;CARMIL2;HSPA5;NTRK3;SEMA4C;PRKCA;LAMB1;SEMA4F;ADRA2A;MMP14;BMP2;SMO;PHPT1;FERMT2	30	0.135747	5
GO:0035269	protein O-linked mannosylation	6/18	0.00167831	6.03434	38.5592	FKRP;SDF2L1;B4GAT1;TMTC1;POMGNT2;LARGE1	6	0.333333	1
GO:0032878	regulation of establishment or maintenance of cell polarity	6/18	0.00167831	6.03434	38.5592	RAP1B;CDH5;RACK1;PTK2B;TEK;CYRIB	6	0.333333	2
GO:0050678	regulation of epithelial cell proliferation	16/93	0.00180349	2.51539	15.8923	ANGPT1;TIE1;LAMB1;NR1D1;FUT2;ZFP36L1;NR4A1;SFRP2;CDK6;NR4A3;SIX4;DEAF1;ERBB2;SCN5A;SOX9;SRSF6	16	0.172043	4
GO:0086026	atrial cardiac muscle cell to AV node cell signaling	4/8	0.00188143	12.0581	75.6735	GJC1;ANK2;KCNA5;SCN5A	4	0.5	5
GO:0043412	macromolecule modification	4/8	0.00188143	12.0581	75.6735	PARP1;PARN;ST3GAL4;CHD1	4	0.5	1
GO:0018401	peptidyl-proline hydroxylation to 4-hydroxy-L-proline	4/8	0.00188143	12.0581	75.6735	EGLN3;P4HA1;P4HB;P4HTM	4	0.5	1
GO:0070475	rRNA base methylation	4/8	0.00188143	12.0581	75.6735	TRMT112;EMG1;NOP2;METTL16	4	0.5	1
GO:0030517	negative regulation of axon extension	8/31	0.00188609	4.20079	26.3526	SEMA4A;SEMA3D;SEMA4C;TRIM46;RNF6;SEMA4F;KIAA0319;RTN4	8	0.258065	4
GO:0044267	cellular protein metabolic process	49/417	0.00190021	1.62157	10.1604	CHRM3;HBS1L;MRPS15;MRPL36;PLOD2;RPL10A;CTSH;CCN1;RPS10;PABPC4;SHISA5;MRPS6;PDIA6;DNAJC3;MXRA8;VWA1;MFGE8;RPL28;UBA52;RPL12;HM13;MRPS33;RPN1;SRBD1;RRBP1;SPG7;PARL;HSP90B1;STK38;PENK;IGFBP7;RIPK1;RPL15;RPL19;MCRS1;FUCA2;TMEM132A;CCDC59;FN1;UBE2G1;LAMB1;HARS2;RPS25;GGCX;CALU;MAN2B1;P4HB;FBN1;UBE2M	49	0.117506	1
GO:0038095	Fc-epsilon receptor signaling pathway	18/111	0.00193171	2.34402	14.6486	MAP2K4;JUN;MAP3K1;PIK3R1;FOS;PSMB8;IKBKB;PPP3CA;MAPK9;PPP3R1;PPP3CB;PSMA3;PAK1;NR4A3;PSMB3;PSME3;PLCG2;MAPK1	18	0.162162	5
GO:0016239	positive regulation of macroautophagy	11/53	0.00198465	3.16606	19.7002	UVRAG;SCOC;TBK1;SESN3;HSPB8;BNIP3;SESN2;KDR;GNAI3;SLC25A5;SIRT1	11	0.207547	1
GO:0086014	atrial cardiac muscle cell action potential	5/13	0.00201856	7.53962	46.7862	GJC1;ANK2;KCNA5;SCN5A;KCNJ3	5	0.384615	4
GO:0036294	cellular response to decreased oxygen levels	13/69	0.00204376	2.80783	17.3888	SUV39H2;EGLN3;KCND2;BNIP3;PTGS2;SIRT1;ZFP36L1;NPEPPS;RGCC;PGK1;MDM2;HYOU1;P4HB	13	0.188406	3
GO:0016241	regulation of macroautophagy	18/112	0.00214016	2.31895	14.2543	USP36;SCOC;ATP6V1G1;SMG1;ATP6V0B;BNIP3;PRKAG1;GNAI3;SNX32;SIRT1;TBK1;SESN3;SESN2;KDR;ATP6V1E1;ATP6V1D;EXOC1;CDK5R1	18	0.160714	1
GO:0010608	posttranscriptional regulation of gene expression	10/46	0.00218233	3.35683	20.5685	ATXN2;DDX25;YTHDC1;RBM4B;RC3H1;METTL16;PARP9;EIF4E;ZNF385A;PUM2	10	0.217391	1
GO:0071363	cellular response to growth factor stimulus	23/158	0.00220432	2.0654	12.6348	FOXC1;FLT1;KIDINS220;NTRK3;HSPB1;WNT7A;IQGAP1;PTPN12;KLF4;KNSTRN;ZFP36L1;MTSS2;TMEM100;NR4A1;ACAP2;BMP2;ERBB2;KDR;RACK1;SOX9;MAPT;MAP2K5;APPL1	23	0.14557	3
GO:0015986	ATP synthesis coupled proton transport	6/19	0.00229508	5.56985	33.8479	DMAC2L;ATP5PB;ATP5MC2;ATP5MC3;ATP5F1C;ATP5MF	6	0.315789	1
GO:0000381	regulation of alternative mRNA splicing, via spliceosome	11/54	0.0023226	3.09226	18.7548	DDX17;PTBP1;RBFOX1;REST;MBNL2;RBFOX2;YTHDC1;HNRNPU;RNPS1;SRSF6;RBM11	11	0.203704	1
GO:1903531	negative regulation of secretion by cell	9/39	0.0023229	3.62418	21.9804	PNKD;RSAD2;CYP51A1;ERP29;HTR1B;SLC30A1;HMGCR;STXBP6;SERGEF	9	0.230769	5
GO:0051028	mRNA transport	17/104	0.00233197	2.36568	14.3385	UPF2;CPSF4;SMG1;YTHDC1;DDX25;AAAS;CDC40;NUP160;ZFP36L1;ARC;KIF5C;HNRNPA2B1;SRSF4;RNPS1;SRSF6;SRSF7;EIF4E	17	0.163462	5
GO:0016070	RNA metabolic process	20/133	0.00282378	2.14399	12.5845	DDX17;RNASEL;RBFOX2;RNGTT;RBPMS;PABPC4;PARN;HNRNPU;ADARB1;LAGE3;LSM8;PTBP1;ATXN2;PABPN1;HNRNPA2B1;PAPOLA;POLR2F;HNRNPH3;POLR2H;RBMS2	20	0.150376	1
GO:0048025	negative regulation of mRNA splicing, via spliceosome	5/14	0.00294297	6.70153	39.0587	PTBP1;RNPS1;SRSF4;SRSF6;SRSF7	5	0.357143	1
GO:0048592	eye morphogenesis	6/20	0.00306808	5.17173	29.9273	FBN2;ALDH1A3;RARG;COL5A2;SHROOM2;FBN1	6	0.3	4
GO:0051457	maintenance of protein location in nucleus	6/20	0.00306808	5.17173	29.9273	SUN2;SUN1;CHCHD10;HNRNPU;RANGAP1;TOPORS	6	0.3	5
GO:0062098	regulation of programmed necrotic cell death	6/20	0.00306808	5.17173	29.9273	CYLD;CDC37;FLOT2;RIPK1;CFLAR;OGT	6	0.3	3
GO:0018212	peptidyl-tyrosine modification	11/56	0.00313808	2.95451	17.0302	HCK;FLT1;FLT3;ERBB2;ABI1;KDR;PTK2B;TEK;JAK2;EPHA3;DDR2	11	0.196429	1
GO:0030308	negative regulation of cell growth	19/126	0.00344004	2.15028	12.197	NDRG3;JADE1;NAIF1;PTPRJ;RNF6;SMARCA2;SIRT1;RTN4;SFRP2;BCL6;PPP2R1A;SESN2;PPT1;RACK1;NDUFS3;TRIM46;ENPP1;CCN3;KIAA0319	19	0.150794	2
GO:0043687	post-translational protein modification	41/345	0.00347921	1.63945	9.28087	RAB3A;HSP90B1;ASB16;SOCS2;PSMB3;SENP8;PENK;FBXO6;ELOB;IGFBP7;CCN1;FBXO9;FN3K;ESCO1;FUCA2;TMEM132A;FN1;FN3KRP;SHISA5;LMO7;LAMB1;COMMD1;BTBD6;FBXO10;PDIA6;PSMB8;DNAJC3;PSMA3;PSME3;ASB8;MXRA8;CALU;STT3A;VWA1;ASB7;P4HB;MFGE8;COPS8;KBTBD8;FBN1;UBE2M	41	0.118841	1
GO:0045931	positive regulation of mitotic cell cycle	7/27	0.00350167	4.22497	23.8901	TAL1;USP2;MDM2;ASNS;PRKCA;PKN2;EIF4E	7	0.259259	4
GO:0007507	heart development	23/164	0.0035669	1.97687	11.1417	KDM6B;NDRG4;MKKS;FOXC1;CXADR;CITED2;SRF;NTRK3;FN1;LDB3;SGCZ;WDR11;AKAP13;BMP2;SGCD;ID2;RBM20;TCAP;SOX9;TEK;FGF12;FBN1;KDM6A	23	0.140244	4
GO:0071260	cellular response to mechanical stimulus	10/49	0.0035671	3.09811	17.4609	CNN2;MAP2K4;MAP3K1;GADD45A;BNIP3;CHEK1;PIEZO1;SOX9;BAK1;MAP3K14	10	0.204082	3
GO:0006986	response to unfolded protein	10/49	0.0035671	3.09811	17.4609	DAXX;HSPH1;HSPA5;HSPB8;DNAJB4;SERPINH1;HSPB1;BAK1;HSPA2;HSPA13	10	0.204082	3
GO:0010605	negative regulation of macromolecule metabolic process	26/194	0.00381742	1.87653	10.4488	CITED2;ATXN2;KDR;RACK1;FLOT2;EMILIN1;LDLR;HAVCR2;TIPARP;SOX11;PARP9;KLF4;SIRT1;WDR54;CLDN5;BMP2;REST;SFRP2;MYCN;SMO;ID2;ERP29;MAPT;TARDBP;TNRC6A;TNRC6B	26	0.134021	1
GO:0006412	translation	28/214	0.00388395	1.82593	10.1356	HBS1L;MRPS15;MRPS33;RPL12;SRBD1;MRPL36;RRBP1;RPL10A;MRPL57;TRMT112;MRPL2;EEF2K;RPL15;RPS10;RPL19;MRPS28;NDUFA7;PABPC4;TMA7;HARS2;MRPS6;WARS2;RPS25;GARS1;PPA2;RPL22L1;RPL28;UBA52	28	0.130841	1
GO:0007005	mitochondrion organization	24/175	0.00395554	1.92643	10.6582	TOMM70;CXADR;PARP1;NUBPL;BNIP3;MTX3;AIP;CHCHD10;AFG1L;TIMM44;SPG7;GABPB1;TFB1M;ATAD3A;FANCG;HK2;NIPSNAP2;PRDX3;SAMM50;OPA1;MFN1;SLIRP;GABPA;ATPAF1	24	0.137143	2
GO:0019856	pyrimidine nucleobase biosynthetic process	3/5	0.00401007	18.0773	99.7679	CAD;CTPS1;UMPS	3	0.6	1
GO:0060291	long-term synaptic potentiation	6/21	0.00401987	4.82668	26.6264	SLC24A2;ARC;PLK2;NPTN;PTK2B;STX4	6	0.285714	5
GO:0034063	stress granule assembly	6/21	0.00401987	4.82668	26.6264	DDX6;ATXN2;CSDE1;CIRBP;MAPT;LSM14A	6	0.285714	2
GO:0032367	intracellular cholesterol transport	5/15	0.00413807	6.03105	33.0955	STARD4;OSBPL2;VPS4A;LDLR;LRP6	5	0.333333	5
GO:0050686	negative regulation of mRNA processing	5/15	0.00413807	6.03105	33.0955	PTBP1;RNPS1;SRSF4;SRSF6;SRSF7	5	0.333333	1
GO:0019216	regulation of lipid metabolic process	15/92	0.00420195	2.35663	12.896	FDPS;NFYB;CYP51A1;EDF1;NR1D2;HMGCR;NR1D1;LSS;MACROH2A1;NCOR2;HELZ2;SQLE;SIN3B;ID2;PMVK	15	0.163043	1
GO:0034976	response to endoplasmic reticulum stress	17/110	0.00424462	2.21233	12.084	PDIA3;EIF2B5;JUN;HSPA5;SEL1L;ATP2A3;PIK3R1;THBS1;PDIA4;HSP90B1;DNAJC10;HYOU1;CHAC1;BAK1;P4HB;RNF185;ATF4	17	0.154545	3
GO:0071364	cellular response to epidermal growth factor stimulus	7/28	0.0043644	4.02356	21.8651	FOXC1;ERBB2;IQGAP1;SOX9;PTPN12;KNSTRN;ZFP36L1	7	0.25	3
GO:0061178	regulation of insulin secretion involved in cellular response to glucose stimulus	7/28	0.0043644	4.02356	21.8651	KLF7;PPP3CB;STXBP4;STX4;NR1D1;ADRA2A;CDK16	7	0.25	5
GO:0007169	transmembrane receptor protein tyrosine kinase signaling pathway	46/404	0.00466977	1.56252	8.38551	FOXC1;FLT1;NCF2;FLT3;ITGB3;NEDD9;PTPRJ;PIK3R1;SOCS2;TIAL1;PTBP1;PAK1;CHN1;ERBB2;AP2S1;KDR;PDK4;POLR2F;MAPK1;PTK2B;SHOC2;POLR2H;JAK2;ATP6V1E1;ATP6V1D;MPZL1;APPL1;ACTR2;ATP6V1G1;EPHA7;ATP6V0B;RBFOX2;ANGPT1;NTRK3;TIE1;HCK;MAPK11;NR4A3;ARPC2;RAB14;RASA1;ABI1;TEK;EPHA3;DDR2;CDK5R1	46	0.113861	3
GO:0042149	cellular response to glucose starvation	9/43	0.00468645	3.19711	17.1464	SESN3;HSPA5;MYBBP1A;SESN2;PIK3R4;PRKAG1;ASNS;SIK2;ATF4	9	0.209302	3
GO:0006493	protein O-linked glycosylation	16/102	0.00469224	2.25105	12.0698	GALNT13;SDF2L1;FKRP;GALNT15;GALNT2;OGA;PLOD2;TMTC1;POMGNT2;POFUT2;B4GAT1;ST3GAL4;GCNT4;GALNTL6;LARGE1;OGT	16	0.156863	1
GO:0097435	supramolecular fiber organization	41/351	0.00470794	1.60719	8.61215	TUBGCP2;KATNB1;PLOD2;RND3;FBLN5;ADAMTS3;MPRIP;SERPINH1;RIPK1;EMILIN1;CRTAP;TPM4;NCKAP5L;TMOD2;SHROOM2;EMP2;HOOK3;SNCAIP;HSPG2;TPPP3;CLIP1;MARCKS;HOOK2;P4HA1;KATNAL2;MYO5B;CENPJ;COL5A3;CLIP4;COL5A2;CORO6;MDM2;COL8A1;COL4A5;TLL1;MAPT;P4HB;MFGE8;UBA52;DBN1;DDR2	41	0.116809	2
GO:0006486	protein glycosylation	19/130	0.00487828	2.07235	11.031	ALG9;GALNT2;MPI;RPN1;GFPT1;B3GALT4;OGA;PLOD2;FUT2;POMGNT2;TMEM165;SERP2;TMEM258;B4GAT1;ST3GAL4;STT3A;GCNT4;LARGE1;OGT	19	0.146154	1
GO:0050658	RNA transport	13/76	0.00490528	2.4949	13.2665	RBFOX1;CDC40;ZFP36L1;ARC;ATXN2;KIF5C;XPO5;HNRNPA2B1;SRSF4;RNPS1;SRSF6;SRSF7;EIF4E	13	0.171053	5
GO:0006040	amino sugar metabolic process	4/10	0.00498207	8.03788	42.6161	CSGALNACT1;FN3K;EXTL2;GFPT1	4	0.4	1
GO:1903351	cellular response to dopamine	4/10	0.00498207	8.03788	42.6161	MAPK1;GABPA;ATF4;TGM2	4	0.4	3
GO:0006002	fructose 6-phosphate metabolic process	4/10	0.00498207	8.03788	42.6161	PFKL;GFPT1;HK2;PFKP	4	0.4	1
GO:1900101	regulation of endoplasmic reticulum unfolded protein response	4/10	0.00498207	8.03788	42.6161	HSPA5;RACK1;BAK1;PIK3R1	4	0.4	3
GO:1903350	response to dopamine	4/10	0.00498207	8.03788	42.6161	MAPK1;GABPA;ATF4;TGM2	4	0.4	3
GO:0030198	extracellular matrix organization	36/300	0.00506611	1.65574	8.75089	FBN2;ITGB1;LAMC3;ELN;ITGB3;PAPLN;ICAM2;PLOD2;NID1;THBS1;FBLN5;THSD4;ADAMTS3;ADAMTS1;ADAMTS17;KDR;SERPINH1;POSTN;CRTAP;ITGA4;FN1;LAMB1;HSPG2;MMP14;MMP16;P4HA1;COL5A3;COL5A2;GFOD2;COL8A1;COL4A5;TLL1;P4HB;DDR2;FBN1;ITGA9	36	0.12	2
GO:0038093	Fc receptor signaling pathway	17/112	0.00511435	2.16552	11.4247	MAP2K4;JUN;MAP3K1;PIK3R1;FOS;PSMB8;IKBKB;PPP3CA;MAPK9;PPP3R1;PPP3CB;PSMA3;PAK1;PSMB3;PSME3;PLCG2;MAPK1	17	0.151786	5
GO:0043933	protein-containing complex subunit organization	17/112	0.00511435	2.16552	11.4247	DET1;TUBGCP2;ST13;CHCHD10;SPG7;PEX14;ADD2;PPP2R1A;MDM2;LPXN;PTK2B;TCAP;ELOB;SOX9;KIFAP3;MDN1;HES5	17	0.151786	2
GO:0006367	transcription initiation from RNA polymerase II promoter	20/140	0.00511789	2.01815	10.6458	HDAC5;RARG;ESRRG;NR1D2;GTF2H1;NR1D1;HDAC7;CDK9;NCOR2;NR4A1;NR4A3;NR6A1;TAF4B;POLR2F;E2F3;MAML3;NRBF2;POLR2H;TAF9B;RXRG	20	0.142857	1
GO:0050684	regulation of mRNA processing	8/36	0.00513736	3.44971	18.1842	SRPK2;CPSF4;PABPN1;YTHDC1;PAPOLA;SAFB2;METTL16;ZFP36L1	8	0.222222	1
GO:0006338	chromatin remodeling	16/103	0.00516944	2.22506	11.7149	INO80C;KDM5A;KDM6B;SUV39H2;HDAC5;DAXX;ACTL6B;CBX3;RSF1;BAZ2B;ACTR8;SMARCA2;SIRT1;PAK1;SOX9;KDM6A	16	0.15534	2
GO:0045638	negative regulation of myeloid cell differentiation	6/22	0.00517349	4.52477	23.8193	CDK6;LDB1;PRMT1;LEO1;PTK2B;ZFP36L1	6	0.272727	4
GO:0035268	protein mannosylation	6/22	0.00517349	4.52477	23.8193	FKRP;SDF2L1;B4GAT1;TMTC1;POMGNT2;LARGE1	6	0.272727	1
GO:0006396	RNA processing	24/179	0.00527268	1.8763	9.84162	DDX17;SRPK2;SF3B4;TCERG1;RNASEL;RNGTT;RBPMS;PABPC4;SUPT4H1;HNRNPU;PRPF4B;ADARB1;PTBP1;PABPN1;PPP2R1A;KHSRP;HNRNPA2B1;SRSF4;RNPS1;SNRNP48;HNRNPH3;TARDBP;SRSF7;RBMS2	24	0.134078	1
GO:0071456	cellular response to hypoxia	19/131	0.00530621	2.05373	10.7592	SUV39H2;EGLN3;KCND2;BNIP3;PTGS2;SIRT1;PSMB8;ZFP36L1;NPEPPS;PSMA3;RGCC;PSMB3;PSME3;PGK1;MDM2;HYOU1;ELOB;P4HB;UBA52	19	0.145038	3
GO:0019319	hexose biosynthetic process	9/44	0.00549857	3.1056	16.1593	G6PC3;MDH1;GOT2;CHST15;PGK1;CRY1;AKR1B1;ALDOB;ATF4	9	0.204545	1
GO:0007409	axonogenesis	30/240	0.0056073	1.7328	8.98227	SPTBN5;ROBO4;RAB3A;SEMA3D;USP33;PIK3R1;PPP3CB;SLITRK2;KIF5C;SLITRK1;GPC1;SLITRK4;NPTN;MAPK1;NEFH;SCN1B;SPTBN1;SEMA4A;EPHA7;CNTN6;SEMA4C;WNT7A;PRKCA;UNC5C;SEMA4F;UNC5D;KLF7;PALLD;EPHA3;CDK5R1	30	0.125	4
GO:2000114	regulation of establishment of cell polarity	5/16	0.00564299	5.48247	28.3846	RAP1B;CDH5;RACK1;PTK2B;CYRIB	5	0.3125	2
GO:0051588	regulation of neurotransmitter transport	5/16	0.00564299	5.48247	28.3846	KCNMB4;CPLX2;SNCAIP;MCTP2;CPLX1	5	0.3125	5
GO:0006468	protein phosphorylation	54/496	0.00585334	1.48677	7.6431	SMG1;FLT1;FLT3;PRKAG1;IKBKB;PPP3CB;TBK1;EEF2K;CHEK1;KDR;PDK4;PDK3;JAK2;CAD;PRKCA;PRPF4B;VRK3;HCK;SIK3;CRY1;SIK2;TRIB1;EPHA3;CDKL1;DDR2;CAMK2B;RNASEL;PIK3R4;PRKX;STK4;MAPK9;PAK1;STK38;ERBB2;PAK6;MAPK1;PTK2B;RIPK1;SRPK2;MAP3K1;PLK2;GLYCTK;DCLK3;GTF2H1;CLK3;CDK9;BMP2;CDK6;ABI1;PKN2;TEK;COPS8;CDK16;CDK5R1	54	0.108871	1
GO:0050679	positive regulation of epithelial cell proliferation	18/123	0.00596084	2.07477	10.6281	EGFL7;STXBP4;ITGB3;WNT7A;PRKCA;SOX11;LAMB1;SIRT1;RTN4;NR4A1;BMP2;NR4A3;ERBB2;KDR;SOX9;SCN5A;TEK;SRSF6	18	0.146341	4
GO:0031175	neuron projection development	23/171	0.00598635	1.88265	9.6359	CNTNAP2;BTG2;TRIO;PRMT1;CDNF;OMG;BICDL1;WNT7A;LAMB1;MANF;GPRIN3;ARC;PAK1;ALS2;EPB41L3;TBC1D24;MAPT;ATXN10;NEFH;LRP12;DBN1;CDK16;CDK5R1	23	0.134503	4
GO:1903507	negative regulation of nucleic acid-templated transcription	51/464	0.00604829	1.50214	7.67292	SUV39H2;LDB1;CITED2;BHLHE41;ZBTB21;RSF1;SIX4;SCMH1;EPC1;SOX9;USP47;DAXX;RBFOX2;ZGPAT;PRMT2;ARID5A;ZNF12;SIRT1;NCOR2;SFRP2;LANCL2;CRY1;HDAC5;L3MBTL3;CIPC;PRICKLE1;CIART;MBTD1;NFIL3;DEAF1;HEXIM1;SPEN;JUN;CBX4;CBX3;NR1D2;NR1D1;KLF4;PHC3;SMARCA2;PEX14;BMP2;GCLC;REST;MYBBP1A;BCL6;ID2;MDM2;CALR;RCOR2;CDK5R1	51	0.109914	1
GO:2000181	negative regulation of blood vessel morphogenesis	13/78	0.00614448	2.41787	12.3123	FOXC1;SERPINF1;KLF4;HSPG2;THBS1;CLDN5;RGCC;ADAMTS1;PGK1;EMILIN1;TEK;CNMD;GTF2I	13	0.166667	4
GO:0030183	B cell differentiation	11/61	0.00620149	2.65833	13.5122	ITGB1;TPD52;HDAC5;ITGA4;FLT3;CEBPG;RABL3;PLCG2;IRF2BP2;PTPRJ;SLC25A5	11	0.180328	4
GO:0043534	blood vessel endothelial cell migration	6/23	0.00655215	4.25838	21.411	CDH5;NR4A1;SRF;KDR;MYH9;EMP2	6	0.26087	5
GO:0060544	regulation of necroptotic process	6/23	0.00655215	4.25838	21.411	CYLD;CDC37;FLOT2;RIPK1;CFLAR;OGT	6	0.26087	3
GO:0030204	chondroitin sulfate metabolic process	7/30	0.00655914	3.67329	18.4652	CSGALNACT1;CHSY1;HEXB;DSEL;HEXA;CHST15;CSPG4	7	0.233333	1
GO:0099504	synaptic vesicle cycle	7/30	0.00655914	3.67329	18.4652	SNAP25;RAB3A;DNAJC5;SYNDIG1;WNT7A;CPLX2;CPLX1	7	0.233333	5
GO:0035666	TRIF-dependent toll-like receptor signaling pathway	7/30	0.00655914	3.67329	18.4652	IKBKB;TBK1;IRF3;UBE2D1;RIPK1;TANK;UBA52	7	0.233333	5
GO:0010468	regulation of gene expression	105/1079	0.00661851	1.31859	6.61652	TFRC;PRDM4;CDH5;PPP2R1A;KHSRP;KDR;ADNP2;SOX9;DAXX;MBNL2;RC3H1;ANK2;SOX11;MYT1;CLDN5;SFRP2;MYCN;DMTF1;SMO;ERP29;ATF4;KMT2D;YTHDC1;CREM;SUPT4H1;ATXN7L3B;HNRNPLL;CIAO3;MACROH2A1;ZFP36L1;SBNO1;PLCG2;SLC38A2;ZNF664;SRPK2;CPSF4;TIPARP;FN1;NR1D2;ESRRG;SMARCA2;COQ7;CLK3;PUM2;CLK1;AFDN;BMP2;RGCC;CDK6;BCL6;ZFAT;ID2;CALR;MYOM1;USP36;LDB1;CITED2;PRKAG1;AFF3;PTBP1;TRIM68;RACK1;CTSH;FLOT2;HMG20A;EMILIN1;METTL1…	105	0.0973123	1
GO:0016311	dephosphorylation	21/153	0.00666682	1.92643	9.65259	DUSP1;PLPPR5;PTPN21;PTPRJ;DUSP28;PTPN12;MTMR4;DUSP26;MTMR7;THTPA;PLPP6;PPP3CA;PTPRB;PPP3CB;UBLCP1;PPP2R1A;PXYLP1;PHPT1;PSPH;ILKAP;PTPN3	21	0.137255	1
GO:0045664	regulation of neuron differentiation	13/79	0.00685119	2.38111	11.8659	SOX11;NEUROD1;BMP2;REST;BRINP1;ID2;CALR;BRINP3;YWHAG;HES5;CDK5RAP2;YWHAH;CDK5R1	13	0.164557	4
GO:0006024	glycosaminoglycan biosynthetic process	15/97	0.0069362	2.21233	10.9975	CSGALNACT1;HS3ST3B1;ANGPT1;ABCC5;HEXA;HSPG2;HS2ST1;B4GAT1;CHSY1;DSEL;GPC1;CHST15;ST3GAL4;PXYLP1;CSPG4	15	0.154639	1
GO:0007411	axon guidance	26/203	0.00694077	1.78023	8.84837	SPTBN5;ROBO4;SEMA3D;USP33;PIK3R1;KIF5C;GPC1;CHN1;PLXNA2;NPTN;MAPK1;SCN1B;SPTBN1;SEMA4A;EPHA7;CNTN6;SEMA4C;PRKCA;UNC5C;SEMA4F;UNC5D;KLF7;SMO;PALLD;EPHA3;CDK5R1	26	0.128079	4
GO:0030516	regulation of axon extension	8/38	0.00724424	3.21938	15.8637	MACF1;GOLGA4;TRIM46;RNF6;MAPT;KIAA0319;RTN4;DBN1	8	0.210526	4
GO:0033173	calcineurin-NFAT signaling cascade	4/11	0.00735742	6.88924	33.8403	NFAT5;PPP3CA;PPP3CB;PPP3R1	4	0.363636	5
GO:0006750	glutathione biosynthetic process	4/11	0.00735742	6.88924	33.8403	GGCT;GCLC;GSS;CHAC1	4	0.363636	1
GO:1904862	inhibitory synapse assembly	4/11	0.00735742	6.88924	33.8403	GABRA2;GABRA1;GABRB2;LGI2	4	0.363636	4
GO:1903204	negative regulation of oxidative stress-induced neuron death	4/11	0.00735742	6.88924	33.8403	REST;NR4A3;RACK1;ATF4	4	0.363636	3
GO:0010642	negative regulation of platelet-derived growth factor receptor signaling pathway	4/11	0.00735742	6.88924	33.8403	NDRG4;LRP1;PTPRJ;PTPN12	4	0.363636	5
GO:0033625	positive regulation of integrin activation	4/11	0.00735742	6.88924	33.8403	P2RY12;RAP1B;PIEZO1;FERMT2	4	0.363636	2
GO:0051932	synaptic transmission, GABAergic	4/11	0.00735742	6.88924	33.8403	GABRA2;GABRA1;GABRB2;GABRA4	4	0.363636	5
GO:0006406	mRNA export from nucleus	16/107	0.00748778	2.12679	10.4095	UPF2;CPSF4;ENY2;SMG1;YTHDC1;DDX25;AAAS;CDC40;NUP160;PABPN1;HNRNPA2B1;SRSF4;RNPS1;SRSF6;SRSF7;EIF4E	16	0.149533	1
GO:0016255	attachment of GPI anchor to protein	3/6	0.00756307	12.0509	58.8624	PIGS;PGAP1;PIGK	3	0.5	1
GO:0060242	contact inhibition	3/6	0.00756307	12.0509	58.8624	PAK1;SMO;PTPRJ	3	0.5	2
GO:0031076	embryonic camera-type eye development	3/6	0.00756307	12.0509	58.8624	ALDH1A3;KDM2B;LRP6	3	0.5	4
GO:0035116	embryonic hindlimb morphogenesis	3/6	0.00756307	12.0509	58.8624	RARG;WNT7A;AFF3	3	0.5	4
GO:0002067	glandular epithelial cell differentiation	3/6	0.00756307	12.0509	58.8624	NEUROD1;BMP2;WDR77	3	0.5	4
GO:0015015	heparan sulfate proteoglycan biosynthetic process, enzymatic modification	3/6	0.00756307	12.0509	58.8624	HS3ST3B1;HS2ST1;HS6ST3	3	0.5	1
GO:0048712	negative regulation of astrocyte differentiation	3/6	0.00756307	12.0509	58.8624	NR1D1;LDLR;HES5	3	0.5	4
GO:0006797	polyphosphate metabolic process	3/6	0.00756307	12.0509	58.8624	MINPP1;PRUNE2;BNIP2	3	0.5	1
GO:1905941	positive regulation of gonad development	3/6	0.00756307	12.0509	58.8624	CITED2;DHX37;SOX9	3	0.5	4
GO:2000020	positive regulation of male gonad development	3/6	0.00756307	12.0509	58.8624	CITED2;DHX37;SOX9	3	0.5	4
GO:0097499	protein localization to non-motile cilium	3/6	0.00756307	12.0509	58.8624	ARL13B;SPATA7;ZDHHC3	3	0.5	5
GO:0061469	regulation of type B pancreatic cell proliferation	3/6	0.00756307	12.0509	58.8624	NR4A1;NR4A3;NR1D1	3	0.5	4
GO:0045786	negative regulation of cell cycle	13/80	0.00762081	2.34544	11.4384	HEXIM1;BTG3;BTG2;FOXC1;DUSP1;NPPC;RNF167;NR4A1;BMP2;BRINP1;CDK6;BRINP3;PTPN3	13	0.1625	4
GO:0086002	cardiac muscle cell action potential involved in contraction	7/31	0.00792212	3.52004	17.0303	GJC1;KCNH2;KCNA5;ANK2;SCN5A;FGF12;SCN1B	7	0.225806	4
GO:0002756	MyD88-independent toll-like receptor signaling pathway	7/31	0.00792212	3.52004	17.0303	IKBKB;TBK1;IRF3;UBE2D1;RIPK1;TANK;UBA52	7	0.225806	5
GO:0033120	positive regulation of RNA splicing	7/31	0.00792212	3.52004	17.0303	SF3B4;TRA2A;CIRBP;RBM20;PIK3R1;HNRNPLL;SLC38A2	7	0.225806	1
GO:0071870	cellular response to catecholamine stimulus	6/24	0.00817894	4.02158	19.3285	NR4A3;MAPK1;ADCY6;GABPA;ATF4;TGM2	6	0.25	3
GO:0043542	endothelial cell migration	8/39	0.00851426	3.11536	14.8479	CDH5;NR4A1;ADGRA2;LPXN;MYH9;PRKX;CCN3;EMP2	8	0.205128	5
GO:0050709	negative regulation of protein secretion	8/39	0.00851426	3.11536	14.8479	REST;RSAD2;CYP51A1;ERP29;CCN3;HMGCR;SERGEF;ADRA2A	8	0.205128	5
GO:0030433	ubiquitin-dependent ERAD pathway	12/73	0.00925389	2.37719	11.1317	FOXRED2;HSPA5;SGTB;SEL1L;DNAJC10;UBXN8;TRIM25;FBXO6;MAN1A1;RNF185;HSP90B1;UBE2J1	12	0.164384	3
GO:0051347	positive regulation of transferase activity	20/148	0.00942643	1.89119	8.82097	VAC14;EPHA7;FLT1;FLT3;RFC2;NTRK3;TIE1;PARN;KLF4;TOPORS;PABPN1;ERBB2;HNRNPA2B1;KDR;UBE2N;MAPK1;NBN;TEK;EPHA3;DDR2	20	0.135135	1
GO:0002062	chondrocyte differentiation	7/32	0.00948288	3.37906	15.7406	WNT10B;BMP2;SNX19;WNT7A;CCN3;SOX9;HES5	7	0.21875	4
GO:0090049	regulation of cell migration involved in sprouting angiogenesis	7/32	0.00948288	3.37906	15.7406	HDAC5;KDR;PTGS2;KLF4;THBS1;MAP2K5;HDAC7	7	0.21875	4
GO:0006352	DNA-templated transcription, initiation	22/168	0.00960967	1.82445	8.47456	HDAC5;RARG;ESRRG;NR1D2;RSF1;GTF2H1;NR1D1;TFB1M;HDAC7;CDK9;NCOR2;NR4A1;NR4A3;NR6A1;TAF4B;POLR2F;E2F3;MAML3;NRBF2;POLR2H;TAF9B;RXRG	22	0.130952	1
GO:0071385	cellular response to glucocorticoid stimulus	5/18	0.00973347	4.63851	21.4864	REST;KLF9;FAM107A;HNRNPU;ZFP36L1	5	0.277778	3
GO:1903055	positive regulation of extracellular matrix organization	5/18	0.00973347	4.63851	21.4864	CARMIL2;BMP2;RGCC;EMILIN1;DDR2	5	0.277778	2
GO:0034446	substrate adhesion-dependent cell spreading	9/48	0.00987708	2.78647	12.8666	ITGA4;LAMC3;ITGB3;FN1;LPXN;LAMB1;PIK3R1;TEK;FERMT2	9	0.1875	4
GO:2000649	regulation of sodium ion transmembrane transporter activity	8/40	0.0099437	3.01785	13.9147	NETO1;HECW2;FXYD6;UTRN;FGF12;SCN1B;YWHAH;PTPN3	8	0.2	5
GO:0001936	regulation of endothelial cell proliferation	14/92	0.0102391	2.16978	9.94093	EGFL7;ANGPT1;ITGB3;TIE1;PRKCA;FUT2;SIRT1;THBS1;NR4A1;BMP2;RGCC;KDR;TEK;CNMD	14	0.152174	4
GO:0097720	calcineurin-mediated signaling	4/12	0.0103734	6.02776	27.5379	NFAT5;PPP3CA;PPP3CB;PPP3R1	4	0.333333	5
GO:0015985	energy coupled proton transport, down electrochemical gradient	4/12	0.0103734	6.02776	27.5379	ATP5PB;ATP5MC2;ATP5MC3;ATP5F1C	4	0.333333	1
GO:0043116	negative regulation of vascular permeability	4/12	0.0103734	6.02776	27.5379	CLDN5;ANGPT1;PTPRJ;FERMT2	4	0.333333	3
GO:0019184	nonribosomal peptide biosynthetic process	4/12	0.0103734	6.02776	27.5379	GGCT;GCLC;GSS;CHAC1	4	0.333333	1
GO:0009225	nucleotide-sugar metabolic process	4/12	0.0103734	6.02776	27.5379	CSGALNACT1;EXTL2;GALT;GFPT1	4	0.333333	1
GO:0033962	P-body assembly	4/12	0.0103734	6.02776	27.5379	DDX6;ATXN2;RC3H1;LSM14A	4	0.333333	2
GO:0006620	posttranslational protein targeting to endoplasmic reticulum membrane	4/12	0.0103734	6.02776	27.5379	SEC61A1;HSPA5;SGTB;GET3	4	0.333333	5
GO:0007167	enzyme linked receptor protein signaling pathway	19/140	0.0107159	1.90004	8.61864	EPHA7;TRIO;FLT1;FLT3;NTRK3;TIE1;NEDD9;LIFR;NPPC;HCK;ERBB2;ABI1;KDR;PTK2B;TEK;JAK2;EPHA3;MPZL1;DDR2	19	0.135714	3
GO:1901890	positive regulation of cell junction assembly	10/57	0.010746	2.56965	11.6488	CNTNAP2;CLDN5;GRID2;SLITRK2;KDR;SYNDIG1;WNT7A;PTPRJ;TEK;FERMT2	10	0.175439	2
GO:0048522	positive regulation of cellular process	64/625	0.0110071	1.38853	6.26117	FLT1;TENM4;FLT3;CITED2;RTKN2;PTPRJ;PPP3CA;POFUT2;CSPP1;CHEK1;KDR;ADNP2;CTSH;SOX9;IL6R;TGM2;IL15RA;USP47;PRMT1;PRKCA;SOX11;EMP2;LIFR;DUSP26;SIRT1;ADRA2A;WDR77;CLDN5;HCK;MMP14;SFRP2;TAL1;MAPT;SLC25A5;ANKRD17;KMT2D;LRP1;SRF;NOP2;THBS1;LRP6;ZFP36L1;PRDX3;NEUROD1;PAK1;ADGRG1;ERBB2;PTK2B;STX4;RPRD1B;TAF9B;HES5;MCTS1;SRPK2;EGR2;NTRK3;FN1;HTR1A;CCPG1;MDM2;FAM98B;P4HB;CALR;IL7R	64	0.1024	4
GO:0032880	regulation of protein localization	11/66	0.0112302	2.41601	10.8458	AFDN;PARP1;RAB14;ITGB3;VPS4A;RACK1;TRIM68;TRIM46;TRIM25;CEP290;CTSD	11	0.166667	5
GO:0051017	actin filament bundle assembly	7/33	0.0112568	3.24892	14.5772	BAIAP2L2;CALD1;FAM107A;SHROOM2;NEDD9;ADD2;HSP90B1	7	0.212121	2
GO:0050919	negative chemotaxis	7/33	0.0112568	3.24892	14.5772	SEMA4A;EPHA7;SEMA3D;ITGB3;SEMA4C;SEMA4F;UNC5C	7	0.212121	3
GO:0046928	regulation of neurotransmitter secretion	7/33	0.0112568	3.24892	14.5772	PNKD;KCNMB4;SLC30A1;CPLX2;SNCAIP;MCTP2;CPLX1	7	0.212121	5
GO:0098662	inorganic cation transmembrane transport	32/274	0.0115356	1.60323	7.15412	SLC24A2;KCNG2;KCNC2;KCNA1;ATP2A3;KCNA5;ATP2C1;TMEM165;KCNN1;SCN5A;TRPM6;SCN1B;ATP5MF;DMAC2L;KCNH2;TRPC6;KCNJ10;KCNK10;KCND2;ABCC8;SLC11A2;KCNJ16;SLC30A1;KCNAB1;KCNAB2;KCNAB3;SLC6A9;KCNS1;SCN8A;KCNQ2;KCNQ5;HCN1	32	0.116788	5
GO:0046782	regulation of viral transcription	8/41	0.0115438	2.92624	13.0557	HEXIM1;CDK9;SUPT4H1;POLR2F;RSF1;POLR2H;MID2;NELFE	8	0.195122	3
GO:0051085	chaperone cofactor-dependent protein refolding	6/26	0.012267	3.61903	15.9268	SDF2L1;HSPA5;ST13;DNAJB4;HSPA2;HSPA13	6	0.230769	1
GO:0016571	histone methylation	6/26	0.012267	3.61903	15.9268	NSD3;SUV39H2;TRMT112;PRMT8;PRMT2;PRMT1	6	0.230769	1
GO:0031112	positive regulation of microtubule polymerization or depolymerization	6/26	0.012267	3.61903	15.9268	PAK1;CLIP1;KATNB1;MAPT;CDK5RAP2;CDK5R1	6	0.230769	2
GO:0050434	positive regulation of viral transcription	6/26	0.012267	3.61903	15.9268	CDK9;SUPT4H1;POLR2F;RSF1;POLR2H;NELFE	6	0.230769	3
GO:1901016	regulation of potassium ion transmembrane transporter activity	6/26	0.012267	3.61903	15.9268	ITGB1;NETO1;KCNS1;ACTN2;ANK2;KCNAB1	6	0.230769	5
GO:0006325	chromatin organization	19/142	0.0123738	1.86894	8.20872	INO80C;KDM5A;KDM6B;SUV39H2;HDAC5;DAXX;ACTL6B;CBX3;SUPT4H1;RSF1;BAZ2B;SMARCA2;CHD1;SIRT1;PAK1;HMG20A;SOX9;BRWD1;KDM6A	19	0.133803	2
GO:0015012	heparan sulfate proteoglycan biosynthetic process	5/19	0.01239	4.30696	18.9113	CSGALNACT1;HS3ST3B1;NDST4;HS2ST1;HS6ST3	5	0.263158	1
GO:0072595	maintenance of protein localization in organelle	5/19	0.01239	4.30696	18.9113	HSPA5;CHCHD10;HNRNPU;HK2;TOPORS	5	0.263158	5
GO:0033119	negative regulation of RNA splicing	5/19	0.01239	4.30696	18.9113	PTBP1;RNPS1;SRSF4;SRSF6;SRSF7	5	0.263158	1
GO:0046599	regulation of centriole replication	5/19	0.01239	4.30696	18.9113	RBM14;PLK2;CENPJ;SPICE1;CDK5RAP2	5	0.263158	2
GO:0030856	regulation of epithelial cell differentiation	5/19	0.01239	4.30696	18.9113	KLF7;MAFG;PRKX;SOX9;APOLD1	5	0.263158	4
GO:0046902	regulation of mitochondrial membrane permeability	5/19	0.01239	4.30696	18.9113	BNIP3;NAIF1;SPG7;BAK1;SLC25A5	5	0.263158	5
GO:0044272	sulfur compound biosynthetic process	16/113	0.0124542	1.99458	8.74765	CSGALNACT1;ANGPT1;MGST3;GSS;MAT2B;GGCT;GCLC;B4GAT1;CHSY1;CBS;DSEL;CHST15;ST3GAL4;CSPG4;CHAC1;METTL16	16	0.141593	1
GO:0048708	astrocyte differentiation	3/7	0.0124842	9.0377	39.6148	EIF2B5;CDK6;HES5	3	0.428571	4
GO:0086067	AV node cell to bundle of His cell communication	3/7	0.0124842	9.0377	39.6148	GJC1;CXADR;SCN5A	3	0.428571	4
GO:0071868	cellular response to monoamine stimulus	3/7	0.0124842	9.0377	39.6148	NR4A3;ADCY6;TGM2	3	0.428571	3
GO:0006689	ganglioside catabolic process	3/7	0.0124842	9.0377	39.6148	NEU3;HEXB;HEXA	3	0.428571	1
GO:0035137	hindlimb morphogenesis	3/7	0.0124842	9.0377	39.6148	RARG;WNT7A;AFF3	3	0.428571	4
GO:0099558	maintenance of synapse structure	3/7	0.0124842	9.0377	39.6148	RAB3A;CHCHD10;CBLN2	3	0.428571	2
GO:1901988	negative regulation of cell cycle phase transition	3/7	0.0124842	9.0377	39.6148	RGCC;MACROH2A1;ZFP36L1	3	0.428571	4
GO:0046929	negative regulation of neurotransmitter secretion	3/7	0.0124842	9.0377	39.6148	RAP1B;PNKD;SLC30A1	3	0.428571	5
GO:0031915	positive regulation of synaptic plasticity	3/7	0.0124842	9.0377	39.6148	CPLX2;DBN1;ANAPC2	3	0.428571	5
GO:0009220	pyrimidine ribonucleotide biosynthetic process	3/7	0.0124842	9.0377	39.6148	CAD;CTPS1;UMPS	3	0.428571	1
GO:0072528	pyrimidine-containing compound biosynthetic process	3/7	0.0124842	9.0377	39.6148	CAD;CTPS1;UMPS	3	0.428571	1
GO:1901201	regulation of extracellular matrix assembly	3/7	0.0124842	9.0377	39.6148	RGCC;TIE1;EMILIN1	3	0.428571	2
GO:1905165	regulation of lysosomal protein catabolic process	3/7	0.0124842	9.0377	39.6148	LAPTM4B;LRP1;LDLR	3	0.428571	1
GO:2000018	regulation of male gonad development	3/7	0.0124842	9.0377	39.6148	CITED2;DHX37;SOX9	3	0.428571	4
GO:0086015	SA node cell action potential	3/7	0.0124842	9.0377	39.6148	ANK2;KCNA5;SCN5A	3	0.428571	4
GO:0032329	serine transport	3/7	0.0124842	9.0377	39.6148	SFXN1;SLC1A4;SLC38A2	3	0.428571	5
GO:0098656	anion transmembrane transport	11/67	0.012531	2.37274	10.3915	SLC35A2;SLC23A2;SLC6A9;ABCC5;PRAF2;SLC1A1;LRRC8D;SFXN1;LRRC8B;SLC25A5;SLC7A3	11	0.164179	5
GO:0043484	regulation of RNA splicing	12/76	0.0126466	2.26539	9.90057	SRPK2;CLK1;PTBP1;MBNL2;YTHDC1;RBM20;HNRNPH3;PIK3R1;METTL16;HNRNPLL;SLC38A2;CLK3	12	0.157895	1
GO:0048666	neuron development	19/143	0.0132757	1.85377	8.01166	CNTNAP2;BTG2;TENM4;ACTL6B;PRMT1;CDNF;SRF;BICDL1;LAMB1;PBX1;MANF;GPRIN3;TBC1D24;PPT1;MAPT;ATXN10;LRP12;CDK16;CDK5R1	19	0.132867	4
GO:0032781	positive regulation of ATPase activity	8/42	0.0133257	2.84002	12.2634	GABARAPL2;TNNT2;DNAJB11;DNAJC10;HNRNPU;AHSA1;ALDOB;PFN2	8	0.190476	1
GO:1903530	regulation of secretion by cell	10/59	0.0136141	2.4645	10.5891	DNAJC1;RAB3A;RAB15;HTR1A;KCNMB4;STX4;MCTP2;CPLX2;SNCAIP;CPLX1	10	0.169492	5
GO:0043066	negative regulation of apoptotic process	51/485	0.0136152	1.4278	6.13462	ITGB1;TFRC;CITED2;HSPB1;IKBKB;FOXQ1;BABAM2;OPA1;SIX4;CFL1;KDR;PDK4;CTSH;SOX9;USP47;KDM2B;PRKCA;SIRT1;ATAD3A;TOPORS;DNAJC3;HCK;TOX3;ARHGAP10;RASA1;UBA52;PIK3R1;THBS1;HSP90B1;PRDX3;SOCS2;BNIP2;MAPK1;PTK2B;RIPK1;TAF9B;MAP2K5;FZD3;ANGPT1;CBX4;HSPA5;PLK2;BNIP3;ASNS;DHCR24;CFLAR;KLF4;GCLC;PPT1;NAA16;TEK	51	0.105155	3
GO:0051093	negative regulation of developmental process	12/77	0.0139666	2.23042	9.5263	SUZ12;KLF7;FOXC1;BMP2;CDK6;TFRC;BNIP3;RC3H1;SOX9;MAPT;KIAA0319;WDR77	12	0.155844	4
GO:1902115	regulation of organelle assembly	12/77	0.0139666	2.23042	9.5263	HCK;CYLD;ATXN2;PLK2;CENPJ;TRAPPC12;SPICE1;TBC1D24;VPS11;TBC1D14;CDKL1;SDCCAG8	12	0.155844	2
GO:2000737	negative regulation of stem cell differentiation	4/13	0.0140866	5.35772	22.8374	REST;HNRNPU;N4BP2L2;HES5	4	0.307692	4
GO:0009205	purine ribonucleoside triphosphate metabolic process	4/13	0.0140866	5.35772	22.8374	OPA1;RAB23;GNAI3;MFN1	4	0.307692	1
GO:0010629	negative regulation of gene expression	36/322	0.0147561	1.52653	6.43599	DDX6;BTG2;CITED2;MACROH2A1;PTBP1;TASOR;KDR;RACK1;NPTN;EPC1;FLOT2;EMILIN1;METTL16;HAVCR2;SUZ12;TIPARP;SOX11;PARP9;KLF4;SIRT1;NCOR2;CLDN5;BMP2;REST;SFRP2;MYCN;RGCC;SMO;ID2;ERP29;CALR;MAPT;TARDBP;LSM14A;TNRC6A;TNRC6B	36	0.111801	1
GO:0043010	camera-type eye development	6/27	0.0147714	3.44651	14.5273	FBN2;ALDH1A3;SHROOM2;CEP290;HES5;FBN1	6	0.222222	4
GO:0034620	cellular response to unfolded protein	6/27	0.0147714	3.44651	14.5273	DAXX;HSPA5;HSPB8;BAK1;HSPA2;HSPA13	6	0.222222	3
GO:0050708	regulation of protein secretion	17/125	0.0149247	1.90351	8.00376	KCNG2;MYOM1;SNAP25;RSAD2;KCNC2;ABCC8;CYP51A1;PRKCA;KCNA5;HMGCR;ADRA2A;NEUROD1;PPP3CB;DNAJC1;ERP29;SERGEF;EXOC1	17	0.136	5
GO:0045893	positive regulation of transcription, DNA-templated	111/1183	0.0150384	1.26472	5.3082	TCERG1;GABPB2;PRDM4;HNRNPU;GABPB1;TBK1;CHEK1;EPC1;SOX9;CCN1;JUNB;CDK5RAP2;KCNH2;DDX17;SOX11;LMO7;SFRP2;MYCN;MAML3;UBA52;ATF4;KMT2D;ENY2;KMT2C;GLIS3;SUPT4H1;PIK3R1;SEC14L2;NEUROD1;HELZ2;PPP3R1;MED30;DHX33;DEAF1;RIPK1;RPRD1B;MAP2K5;JUN;EGR2;CHCHD10;NR1D2;ESRRG;NR1D1;SMARCA2;PBX1;FOSL2;CDK9;NR4A1;BMP2;RGCC;NR4A3;ID2;OGT;KDM5A;CSRNP1;RARG;LDB1;CITED2;RSF1;LDB2;IKBKB;PPP3CA;EDRF1;PPP3CB;DBP;SIX4;CEP29…	111	0.0938292	1
GO:0016525	negative regulation of angiogenesis	13/87	0.0150895	2.12277	8.90236	FOXC1;SERPINF1;KLF4;HSPG2;THBS1;CLDN5;RGCC;ADAMTS1;PGK1;EMILIN1;TEK;CNMD;GTF2I	13	0.149425	4
GO:0006405	RNA export from nucleus	15/106	0.0152916	1.99255	8.32977	UPF2;CPSF4;SMG1;YTHDC1;DDX25;AAAS;CDC40;NUP160;XPO5;HNRNPA2B1;SRSF4;RNPS1;SRSF6;SRSF7;EIF4E	15	0.141509	5
GO:0001678	cellular glucose homeostasis	8/43	0.0153004	2.75872	11.5311	RACK1;LRRC8D;PDK3;PIK3R1;NR1D1;ZNF236;SIRT1;HK2	8	0.186047	1
GO:0018108	peptidyl-tyrosine phosphorylation	11/69	0.015472	2.29067	9.54918	HCK;FLT1;FLT3;ERBB2;ABI1;KDR;PTK2B;TEK;JAK2;EPHA3;DDR2	11	0.15942	1
GO:0032273	positive regulation of protein polymerization	11/69	0.015472	2.29067	9.54918	FCHSD1;HCK;BAIAP2L2;CLIP1;PAK1;TPPP3;PTK2B;MAPT;CDK5RAP2;PFN2;CDK5R1	11	0.15942	2
GO:0042398	cellular modified amino acid biosynthetic process	5/20	0.0154974	4.01961	16.75	GGCT;GCLC;GSS;PLOD2;CHAC1	5	0.25	1
GO:0010586	miRNA metabolic process	5/20	0.0154974	4.01961	16.75	DDX17;KHSRP;XPO5;PARN;DGCR8	5	0.25	1
GO:0043551	regulation of phosphatidylinositol 3-kinase activity	7/35	0.0155043	3.01652	12.5688	P2RY12;FLT1;FLT3;PIK3R4;PTK2B;PIK3R1;TEK	7	0.2	1
GO:0001558	regulation of cell growth	26/217	0.0157518	1.64848	6.84253	NDRG3;TFRC;NAIF1;FAM107A;JADE1;PTPRJ;RASGRP2;RTN4;SOCS2;PPP2R1A;SESN2;ERBB2;RACK1;ADNP2;ENPP1;CCN3;TAF9B;USP47;SMARCA2;SIRT1;ATAD3A;MMP14;SFRP2;BCL6;PPT1;NDUFS3	26	0.119816	2
GO:0043408	regulation of MAPK cascade	21/166	0.0161636	1.75247	7.22893	EPHA7;FLT1;FLT3;DUSP1;NTRK3;FN1;PTPRJ;IQGAP1;STK4;WDR54;ADRA2A;BMP2;PAK1;DHX33;ERBB2;KDR;PLCG2;MAPK1;PAK6;TEK;CCN1	21	0.126506	3
GO:1903078	positive regulation of protein localization to plasma membrane	9/52	0.0164736	2.52672	10.3747	ITGB1;LRP1;CNPY4;RACK1;STX4;PIK3R1;ATP2C1;EPHA3;SPTBN1	9	0.173077	5
GO:2000113	negative regulation of cellular macromolecule biosynthetic process	56/547	0.016619	1.38606	5.67899	SUV39H2;BTG2;LDB1;CITED2;BHLHE41;ZBTB21;RSF1;SIX4;SCMH1;RACK1;EPC1;ENPP1;SOX9;USP47;DAXX;RBFOX2;ZGPAT;PRMT2;ARID5A;ZNF12;SIRT1;NCOR2;SFRP2;LANCL2;CRY1;HDAC5;DDX6;L3MBTL3;CIPC;PRICKLE1;CIART;MBTD1;NFIL3;DEAF1;HEXIM1;SPEN;JUN;CBX4;CBX3;NR1D2;NR1D1;KLF4;PHC3;SMARCA2;PEX14;BMP2;GCLC;REST;MYBBP1A;BCL6;ID2;MDM2;CALR;RCOR2;LSM14A;CDK5R1	56	0.102377	1
GO:0010811	positive regulation of cell-substrate adhesion	11/70	0.0171233	2.25172	9.15847	CDK6;FN1;NEDD9;PTK2B;EMP2;CALR;P4HB;JAK2;UTRN;FBLN2;FERMT2	11	0.157143	4
GO:0022008	neurogenesis	8/44	0.0174786	2.68195	10.8532	NEUROD1;CDK6;SIX4;RITA1;CHAC1;BTBD6;MAPT;CDK5RAP2	8	0.181818	4
GO:0001954	positive regulation of cell-matrix adhesion	8/44	0.0174786	2.68195	10.8532	CDK6;KDR;PTK2B;PTPRJ;EMP2;TEK;UTRN;FERMT2	8	0.181818	4
GO:0015807	L-amino acid transport	6/28	0.0176097	3.28967	13.288	PRAF2;SLC1A1;SLC1A4;SFXN1;SLC38A2;SLC7A3	6	0.214286	5
GO:0043552	positive regulation of phosphatidylinositol 3-kinase activity	6/28	0.0176097	3.28967	13.288	P2RY12;FLT1;FLT3;PIK3R4;PTK2B;TEK	6	0.214286	1
GO:0043069	negative regulation of programmed cell death	41/381	0.0177154	1.46296	5.90058	TFRC;CITED2;HSPB1;PIK3R1;THBS1;HSP90B1;PRDX3;IKBKB;SOCS2;BABAM2;OPA1;SIX4;CFL1;KDR;CTSH;BNIP2;PTK2B;RIPK1;SOX9;TAF9B;USP47;CBX4;HSPA5;ANGPT1;PLK2;BNIP3;ASNS;DHCR24;CFLAR;SIRT1;ATAD3A;TOPORS;DNAJC3;HCK;ARHGAP10;GCLC;RASA1;PPT1;NAA16;TEK;UBA52	41	0.107612	3
GO:0032886	regulation of microtubule-based process	7/36	0.0180067	2.91235	11.6989	MACF1;CYLD;ERBB2;FAM107A;MAPT;BICD2;EPHA3	7	0.194444	2
GO:0030278	regulation of ossification	7/36	0.0180067	2.91235	11.6989	BMP2;CHSY1;ENPP1;SOX11;SOX9;LRP6;DDR2	7	0.194444	2
GO:0009267	cellular response to starvation	20/158	0.0184723	1.75319	6.99784	GABARAPL2;ATP6V1G1;ATP6V0B;HSPA5;USP33;PIK3R4;PRKAG1;ASNS;SIRT1;SESN3;MYBBP1A;BMT2;SESN2;VPS41;PDK4;MAPK1;SIK2;ATP6V1E1;ATP6V1D;ATF4	20	0.126582	3
GO:0036498	IRE1-mediated unfolded protein response	9/53	0.0185331	2.46916	9.84748	DNAJC3;EXTL2;HSPA5;FKBP14;DNAJB11;GFPT1;PREB;HYOU1;PDIA6	9	0.169811	3
GO:0045446	endothelial cell differentiation	4/14	0.0185441	4.82169	19.227	KDM6B;TIE1;KDR;EDF1	4	0.285714	4
GO:0006828	manganese ion transport	4/14	0.0185441	4.82169	19.227	TRPC6;SLC11A2;ATP2C1;TMEM165	4	0.285714	5
GO:0090051	negative regulation of cell migration involved in sprouting angiogenesis	4/14	0.0185441	4.82169	19.227	HDAC5;KLF4;THBS1;MAP2K5	4	0.285714	4
GO:0046134	pyrimidine nucleoside biosynthetic process	4/14	0.0185441	4.82169	19.227	UCK2;CAD;TK1;UMPS	4	0.285714	1
GO:0071427	mRNA-containing ribonucleoprotein complex export from nucleus	14/99	0.0188041	1.99033	7.90894	UPF2;CPSF4;SMG1;YTHDC1;DDX25;AAAS;CDC40;NUP160;HNRNPA2B1;SRSF4;RNPS1;SRSF6;SRSF7;EIF4E	14	0.141414	1
GO:0009067	aspartate family amino acid biosynthetic process	3/8	0.0188459	7.22977	28.7127	MTRR;ASNS;PLOD2	3	0.375	5
GO:0044331	cell-cell adhesion mediated by cadherin	3/8	0.0188459	7.22977	28.7127	AFDN;CDH5;CTNND1	3	0.375	4
GO:0034058	endosomal vesicle fusion	3/8	0.0188459	7.22977	28.7127	VPS41;VPS4A;VPS11	3	0.375	5
GO:0015014	heparan sulfate proteoglycan biosynthetic process, polysaccharide chain biosynthetic process	3/8	0.0188459	7.22977	28.7127	CSGALNACT1;NDST4;HS2ST1	3	0.375	1
GO:0001779	natural killer cell differentiation	3/8	0.0188459	7.22977	28.7127	NFIL3;RABL3;PBX1	3	0.375	4
GO:1900222	negative regulation of amyloid-beta clearance	3/8	0.0188459	7.22977	28.7127	SRF;CYP51A1;HMGCR	3	0.375	1
GO:1903306	negative regulation of regulated secretory pathway	3/8	0.0188459	7.22977	28.7127	RAP1B;REST;ADRA2A	3	0.375	5
GO:0010763	positive regulation of fibroblast migration	3/8	0.0188459	7.22977	28.7127	ITGB1;THBS1;DDR2	3	0.375	5
GO:0043403	skeletal muscle tissue regeneration	3/8	0.0188459	7.22977	28.7127	PPP3CA;CFLAR;LARGE1	3	0.375	4
GO:0014866	skeletal myofibril assembly	3/8	0.0188459	7.22977	28.7127	ACTA1;TCAP;CFLAR	3	0.375	4
GO:0001913	T cell mediated cytotoxicity	3/8	0.0188459	7.22977	28.7127	CADM1;CTSH;EMP2	3	0.375	3
GO:2000045	regulation of G1/S transition of mitotic cell cycle	11/71	0.0189026	2.21407	8.78646	ANKRD17;CDK6;RGCC;PRMT2;ADAMTS1;PSME3;ID2;FAM107A;JADE1;KLF4;APPL1	11	0.15493	4
GO:0006915	apoptotic process	27/231	0.0189275	1.60272	6.3582	CSRNP1;PDE1B;PRUNE2;JADE1;STK4;RTN4;HK2;PPP2R1A;CASP6;CHEK1;PAK6;BNIP2;PTK2B;RIPK1;BAK1;JAK2;RELT;ZNF385A;EGLN3;PARP1;GADD45A;BNIP3;DHCR24;CFLAR;IRF3;MDM2;OGT	27	0.116883	3
GO:0032526	response to retinoic acid	10/62	0.0189413	2.32194	9.20977	WNT10B;RARG;BRINP1;ADNP2;CTSH;PTK2B;SOX9;BRINP3;RXRG;EPHA3	10	0.16129	3
GO:0051403	stress-activated MAPK cascade	10/62	0.0189413	2.32194	9.20977	IKBKB;MAP2K4;MAPK9;MAPK11;SH2D3C;UBE2N;MAPK1;TRIB1;UBA52;ZFP36L1	10	0.16129	3
GO:2000242	negative regulation of reproductive process	5/21	0.0190841	3.76818	14.9178	NPPC;DUSP1;ARHGDIB;CALR;WDR77	5	0.238095	4
GO:0006998	nuclear envelope organization	5/21	0.0190841	3.76818	14.9178	SUN2;SUN1;VPS4A;LEMD2;TMEM170A	5	0.238095	2
GO:0071168	protein localization to chromatin	5/21	0.0190841	3.76818	14.9178	MCM8;TASOR;SGF29;LEMD2;MACROH2A1	5	0.238095	5
GO:0051962	positive regulation of nervous system development	8/45	0.0198707	2.60932	10.2247	SPEN;GRID2;SLITRK2;SERPINF1;SYNDIG1;WNT7A;SOX11;TGM2	8	0.177778	4
GO:0006282	regulation of DNA repair	8/45	0.0198707	2.60932	10.2247	BABAM1;CDK9;BABAM2;CEBPG;EYA4;RNF8;UBE2N;SIRT1	8	0.177778	1
GO:0006470	protein dephosphorylation	18/139	0.0199027	1.79885	7.04592	DUSP1;EYA4;PTPN21;PTPRJ;PTPN12;MTMR4;DUSP26;MTMR7;PPP3CA;PTPRB;PPP3CB;UBLCP1;PPP2R1A;PPP2R2B;RPRD1B;PHPT1;ILKAP;PTPN3	18	0.129496	1
GO:0051893	regulation of focal adhesion assembly	9/54	0.0207731	2.41415	9.35267	MACF1;LDB1;FAM107A;KDR;PTPRJ;TEK;THBS1;EPHA3;FERMT2	9	0.166667	2
GO:2000249	regulation of actin cytoskeleton reorganization	7/37	0.0207797	2.81512	10.9051	HCK;BAIAP2L2;NTRK3;ARHGDIB;PTK2B;TEK;PHPT1	7	0.189189	2
GO:0045646	regulation of erythrocyte differentiation	7/37	0.0207797	2.81512	10.9051	FAM210B;MAPK11;CDK6;LDB1;PRMT1;TAL1;ZFP36L1	7	0.189189	4
GO:1900744	regulation of p38MAPK cascade	7/37	0.0207797	2.81512	10.9051	CYLD;BMP2;DUSP1;GADD45A;PRMT1;SASH1;GADD45G	7	0.189189	3
GO:0010001	glial cell differentiation	6/29	0.0208004	3.14647	12.1856	EIF2B5;EGR2;GPC1;SOX11;SOX9;HES5	6	0.206897	4
GO:0000904	cell morphogenesis involved in differentiation	11/72	0.0208151	2.17766	8.43206	ITGA4;ARL13B;LAMC3;ITGB3;FN1;LPXN;LAMB1;PIK3R1;TEK;FERMT2;ATF4	11	0.152778	4
GO:0045596	negative regulation of cell differentiation	23/191	0.0209915	1.65671	6.40093	SUZ12;WNT10B;TRIO;ITGB3;HNRNPU;SRA1;LDLRAD4;SIRT1;HDAC7;PTBP1;REST;SFRP2;CDK6;CHADL;ID2;COL5A2;LEO1;ENPP1;PTK2B;SOX9;CALR;FERMT2;HES5	23	0.120419	4
GO:0048524	positive regulation of viral process	10/63	0.021017	2.27801	8.79863	SRPK2;CDK9;VPS4A;SUPT4H1;POLR2F;RSF1;PKN2;ADARB1;POLR2H;NELFE	10	0.15873	3
GO:0006796	phosphate-containing compound metabolic process	25/212	0.0210741	1.61827	6.24604	SLC20A1;PLPPR5;HK2;THTPA;GK5;PPP3CA;PPP3CB;PAK1;PPIP5K1;PLCG2;PGK1;ENPP1;PSPH;EPHA7;GFPT1;DUSP28;MINPP1;PTPRB;PFKL;G6PC3;PPA2;PLAA;PXYLP1;ALDOB;PFKP	25	0.117925	1
GO:0048523	negative regulation of cellular process	57/566	0.0212184	1.36048	5.24178	BTG3;BTG2;RARG;JADE1;PTPRJ;ADARB1;ADAMTS1;PPP2R1A;SESN2;ARHGDIB;RACK1;ADNP2;ENPP1;EMILIN1;CCN3;JAK2;CCN1;KLF11;DUSP1;SOX11;P3H3;SIRT1;RNF167;SFRP2;RASA1;NDUFS3;MYH9;SRSF6;NDRG3;NAIF1;FBLN1;RTN4;ADGRG1;BRINP1;CLMN;PLXNA2;LPXN;PTK2B;IGFBP7;SUZ12;ANGPT1;BNIP3;THAP12;KLF4;SMARCA2;NR4A1;FABP3;BMP2;REST;CDK6;RGCC;BCL6;FABP7;ABI1;PPT1;COPS8;FERMT2	57	0.100707	4
GO:0042127	regulation of cell population proliferation	74/764	0.0223359	1.30479	4.96026	BTG3;BTG2;RARG;FLT1;TFRC;FLT3;ELN;RTKN2;PTPRJ;ADARB1;SIX4;ADAMTS1;KDR;CTSH;SOX9;JAK2;JUNB;IL6R;KLF11;RBFOX2;PRMT1;SOX11;EMP2;LIFR;P3H3;SIRT1;ADRA2A;WDR77;CLDN5;HCK;SFRP2;SLC25A5;KMT2D;NOP2;THBS1;ZFP36L1;PRDX3;PAK1;ADGRG1;CLMN;ERBB2;PTK2B;STX4;IGFBP7;RPRD1B;HES5;MCTS1;SRPK2;JUN;EGLN3;NTRK3;FN1;THAP12;HTR1A;KLF4;SMARCA2;SQLE;FABP3;BMP2;REST;CDK6;RGCC;NR4A3;BCL6;CCPG1;FABP7;ID2;BCL6B;ABI1;MDM2;FAM98…	74	0.0968586	4
GO:0043065	positive regulation of apoptotic process	34/310	0.0224737	1.49279	5.66574	ITGB1;RARG;TRIO;ARHGEF26;STK4;NEUROD1;AKAP13;PNMA1;RACK1;RIPK1;BAK1;CTSD;TGM2;SRPK2;WNT10B;KLF11;EPHA7;JUN;PRMT2;GADD45A;BNIP3;SIRT1;GADD45G;ARHGEF9;BMP2;REST;SFRP2;MYBBP1A;BCL6;ARHGEF3;RNPS1;UBA52;ATF4;CDK5R1	34	0.109677	3
GO:0035592	establishment of protein localization to extracellular region	8/46	0.0224866	2.54052	9.64084	TANGO6;RAB3A;TMEM167A;RAB15;SEL1L;PREB;MON1A;PDIA4	8	0.173913	5
GO:0048661	positive regulation of smooth muscle cell proliferation	8/46	0.0224866	2.54052	9.64084	JUN;NR4A3;ADAMTS1;ID2;HTR1B;THBS1;IL6R;HES5	8	0.173913	4
GO:0050730	regulation of peptidyl-tyrosine phosphorylation	13/92	0.023164	1.98787	7.48465	EPHA7;ANGPT1;ITGB3;PTPRJ;LRP8;SAMSN1;SFRP2;BANK1;PLCG2;PTK2B;CSPG4;JAK2;IL6R	13	0.141304	1
GO:0048284	organelle fusion	5/22	0.0231755	3.54633	13.3507	OPA1;MFN1;VPS11;STX4;SPG7	5	0.227273	2
GO:0099623	regulation of cardiac muscle cell membrane repolarization	5/22	0.0231755	3.54633	13.3507	KCNH2;ANK2;KCNA5;SCN5A;SCN1B	5	0.227273	4
GO:0031167	rRNA methylation	5/22	0.0231755	3.54633	13.3507	TRMT112;EMG1;NOP2;TFB1M;METTL16	5	0.227273	1
GO:0009306	protein secretion	10/64	0.0232535	2.2357	8.40915	NEUROD1;TANGO6;RAB3A;SNX19;TMEM167A;RAB15;SEL1L;PREB;MON1A;PDIA4	10	0.15625	5
GO:0046039	GTP metabolic process	4/15	0.0237827	4.38311	16.3876	OPA1;RAB23;GNAI3;MFN1	4	0.266667	1
GO:0030307	positive regulation of cell growth	14/102	0.0238054	1.92217	7.18475	ITSN2;MACF1;USP47;SYT3;SYT2;GOLGA4;MMP14;SFRP2;ERBB2;ADNP2;PLAA;MAPT;TAF9B;DBN1	14	0.137255	2
GO:1904018	positive regulation of vasculature development	14/102	0.0238054	1.92217	7.18475	ITGB1;FLT1;TIE1;HSPB1;PRKCA;SIRT1;THBS1;HK2;CDH5;SFRP2;KDR;CTSH;TEK;SASH1	14	0.137255	4
GO:0010646	regulation of cell communication	7/38	0.0238361	2.72416	10.179	SOCS2;CXADR;IGFBP7;ANK2;YWHAG;TBX18;CDC42SE2	7	0.184211	5
GO:0016310	phosphorylation	42/400	0.0239012	1.42283	5.3126	CAMK2B;RNASEL;DGKB;PRKAG1;PIK3R4;STK4;IKBKB;GK5;MAPK9;PPP3CB;PAK1;TBK1;FGGY;STK38;CHEK1;ERBB2;PGK1;PDK4;PDK3;PAK6;MAPK1;PTK2B;JAK2;SRPK2;EPHA7;MAP3K1;PLK2;GLYCTK;PRKCA;PRPF4B;CLK3;CDK9;HCK;BMP2;CDK6;SIK3;PKN2;SIK2;COPS8;TRIB1;CDK16;CDKL1	42	0.105	1
GO:0045667	regulation of osteoblast differentiation	12/83	0.0241953	2.04126	7.59676	FBN2;BMP2;REST;CDK6;SOX11;SOX9;CCN1;IL6R;FERMT2;ATF4;DDR2;HDAC7	12	0.144578	4
GO:0045944	positive regulation of transcription by RNA polymerase II	86/908	0.0242857	1.27389	4.73614	CSRNP1;TCERG1;RARG;GABPB2;PRDM4;LDB1;CITED2;HNRNPU;RSF1;LDB2;GABPB1;IKBKB;PPP3CA;PPP3CB;TBK1;DBP;EPC1;SOX9;CCN1;JUNB;GABPA;DDX17;KDM6B;ACTR2;RBM14;PARP1;SOX11;LMO7;FOS;SIRT1;ETV4;RGMA;TOX3;SFRP2;MYCN;IRF3;TAL1;MED21;MAML3;UBA52;ATF4;KMT2D;HDAC5;NFAT5;RNASEL;FOXC1;NFIX;KMT2C;SRF;CEBPG;GLIS3;SUPT4H1;PIK3R1;LAGE3;LRP6;NEUROD1;HELZ2;PPP3R1;MED30;NRIP1;LEO1;E2F3;RIPK1;RPRD1B;RXRG;MAP2K5;JUN;EGR2;NFYB;…	86	0.0947137	1
GO:0090218	positive regulation of lipid kinase activity	6/30	0.0243608	3.01521	11.2008	P2RY12;FLT1;FLT3;PIK3R4;PTK2B;TEK	6	0.2	1
GO:1905475	regulation of protein localization to membrane	6/30	0.0243608	3.01521	11.2008	MMP14;GPC1;VPS4A;SLC5A3;SPTBN1;APPL1	6	0.2	5
GO:1901216	positive regulation of neuron death	8/47	0.025336	2.47524	9.09782	SRPK2;DAXX;EPHA7;REST;FOS;MAPT;ATF4;CDK5R1	8	0.170213	3
GO:0051252	regulation of RNA metabolic process	10/65	0.0256568	2.19493	8.03992	CLK1;USP36;PTBP1;MBNL2;RASA1;RC3H1;RBM20;HNRNPH3;HNRNPLL;CLK3	10	0.153846	1
GO:0006694	steroid biosynthetic process	10/65	0.0256568	2.19493	8.03992	HSD11B1;SQLE;INSIG2;OSBPL3;PMVK;CYP51A1;OSBPL2;HMGCR;LBR;LSS	10	0.153846	1
GO:0006812	cation transport	21/174	0.0259424	1.66011	6.06253	KCNG2;KCNJ6;TRPC6;KCNJ10;ABCC8;KCNA1;SLC11A2;SLC1A1;KCNJ16;KCNAB1;KCNA5;KCNAB3;SLC6A9;KCNS1;SCN8A;PIEZO1;KCNMB4;KCNN1;SCN5A;TRPM6;KCNJ3	21	0.12069	5
GO:0022603	regulation of anatomical structure morphogenesis	16/123	0.0260603	1.80719	6.59144	RC3H1;EMP2;CYRIB;ARC;PAK1;BCL6;ADGRA2;ZMYM4;HECW2;CFL1;CHN1;ERBB2;MAPT;PDZD8;FERMT2;CDK5R1	16	0.130081	4
GO:0015031	protein transport	39/369	0.0261779	1.43264	5.21887	VPS29;MACF1;RAB5B;RAB3A;TFRC;LRP1;TMEM167A;SEL1L;DNAJC27;HSP90B1;AP4M1;SNX4;GOLGA4;RAB23;TBC1D30;SYNDIG1;TBC1D14;STX4;ATP6V1E1;ATP6V1D;CEP290;SPTBN1;YWHAH;CTSA;ATP6V1G1;TANGO6;ATP6V0B;LRP1B;WDR11;PDIA4;TBC1D4;RAB14;RAB15;RABL3;PPT1;ERP29;MYH9;PREB;MON1A	39	0.105691	5
GO:0030098	lymphocyte differentiation	12/84	0.0263272	2.0128	7.32087	ITGB1;TPD52;HDAC5;ITGA4;NFIL3;FLT3;CEBPG;RABL3;PLCG2;PTPRJ;SLC25A5;PBX1	12	0.142857	4
GO:0010628	positive regulation of gene expression	49/482	0.0266046	1.3732	4.98014	MYOM1;TFRC;CITED2;PRKAG1;CDH5;CTSH;EMILIN1;SOX9;GABPA;CIRBP;SOX11;ANK2;ADRA2A;CLDN5;ACTA1;MYCN;SMO;RNF207;ERP29;RBM20;ATF4;PIK3R1;HNRNPLL;MACROH2A1;THBS1;MAPK9;ERBB2;PLCG2;POLR2F;MAPK1;RIPK1;POLR2H;SLC38A2;SRPK2;CADM1;ANGPT1;NTRK3;FN1;UPF3A;KLF4;AFDN;MAPK11;BMP2;RGCC;MYBBP1A;ID2;FAM98B;TNRC6A;TNRC6B	49	0.10166	1
GO:0036500	ATF6-mediated unfolded protein response	3/9	0.0266781	6.02448	21.8322	HSPA5;CALR;HSP90B1	3	0.333333	3
GO:0030388	fructose 1,6-bisphosphate metabolic process	3/9	0.0266781	6.02448	21.8322	PFKL;ALDOB;PFKP	3	0.333333	1
GO:0048333	mesodermal cell differentiation	3/9	0.0266781	6.02448	21.8322	ITGB1;KDM6B;ITGB3	3	0.333333	4
GO:0018243	protein O-linked glycosylation via threonine	3/9	0.0266781	6.02448	21.8322	GALNT13;GALNT2;GALNTL6	3	0.333333	1
GO:2001014	regulation of skeletal muscle cell differentiation	3/9	0.0266781	6.02448	21.8322	DDX17;GPC1;NR1D2	3	0.333333	4
GO:0044321	response to leptin	3/9	0.0266781	6.02448	21.8322	NR4A3;NR1D1;SIRT1	3	0.333333	3
GO:0010634	positive regulation of epithelial cell migration	13/94	0.0271606	1.93858	6.9905	ANGPT1;ITGB3;PRKCA;THBS1;RTN4;KDR;PLCG2;CTSH;PTK2B;SOX9;CALR;TEK;SASH1	13	0.138298	4
GO:0033683	nucleotide-excision repair, DNA incision	7/39	0.0271877	2.63889	9.51316	POLD4;PARP1;RFC2;POLD1;GTF2H1;UBA52;FAN1	7	0.179487	1
GO:0007229	integrin-mediated signaling pathway	11/75	0.0274052	2.07524	7.4647	ITGB1;HCK;ADAMTS1;ITGB3;FN1;MYH9;NEDD9;PTK2B;ITGBL1;FBLN1;FERMT2	11	0.146667	5
GO:0050796	regulation of insulin secretion	14/104	0.0276503	1.87925	6.74296	KCNG2;SNAP25;STXBP4;KCNC2;ABCC8;PRKCA;KCNA5;NR1D1;ADRA2A;NEUROD1;PPP3CB;REST;CCN3;CDK16	14	0.134615	5
GO:0030705	cytoskeleton-dependent intracellular transport	5/23	0.027793	3.34913	11.9998	CCDC186;HOOK2;KIF5C;TUBB;HOOK3	5	0.217391	5
GO:0070371	ERK1 and ERK2 cascade	5/23	0.027793	3.34913	11.9998	KDR;CTSH;MAPK1;SOX9;ZFP36L1	5	0.217391	3
GO:0008213	protein alkylation	5/23	0.027793	3.34913	11.9998	PRMT8;PRMT2;PRMT1;FAM98B;CAMKMT	5	0.217391	1
GO:0032147	activation of protein kinase activity	15/114	0.0278674	1.83074	6.5546	PRR5;ANGPT1;ITGB3;NTRK3;ADCY4;EMP2;STK4;ADRA2A;ADCY6;PAK1;ADCY9;PAK6;PTK2B;COPS8;JAK2	15	0.131579	1
GO:0001934	positive regulation of protein phosphorylation	39/371	0.0281989	1.42385	5.08097	TFRC;ITGB3;PRKAG1;PTPRJ;IQGAP1;STK4;LRP8;PAK1;TBK1;ERBB2;KDR;PLCG2;RACK1;NPTN;MAPK1;PTK2B;RIPK1;SOX9;NBN;CCN1;JAK2;IL6R;DAXX;RBPMS;ANGPT1;NTRK3;SH2D3C;SIRT1;CDK9;BMP2;SFRP2;ALS2;BANK1;ERP29;CSPG4;TEK;CALM2;PFN2;DDR2	39	0.105121	1
GO:0051084	'de novo' posttranslational protein folding	6/31	0.0283061	2.89444	10.3178	SDF2L1;HSPA5;ST13;DNAJB4;HSPA2;HSPA13	6	0.193548	1
GO:0006893	Golgi to plasma membrane transport	8/48	0.0284278	2.41323	8.59203	MACF1;GOLGA4;EXOC6B;STXBP6;COMMD1;SPTBN1;EXOC2;EXOC1	8	0.166667	5
GO:0043536	positive regulation of blood vessel endothelial cell migration	8/48	0.0284278	2.41323	8.59203	ANGPT1;KDR;HSPB1;PRKCA;PTGS2;THBS1;SIRT1;HDAC7	8	0.166667	5
GO:0045739	positive regulation of DNA repair	8/48	0.0284278	2.41323	8.59203	BABAM1;BABAM2;PARP1;CEBPG;EYA4;RNF8;UBE2N;SIRT1	8	0.166667	1
GO:0022607	cellular component assembly	29/261	0.0284329	1.51336	5.38789	DET1;TUBGCP2;FAM107A;NEDD9;SPG7;RTN4;ADD2;BAIAP2L2;PPP2R1A;CALD1;LPXN;PTK2B;ELOB;SOX9;KIFAP3;NEFH;CEP290;SPTBN1;MDN1;HES5;RSPH4A;ST13;SHROOM2;WNT7A;CHCHD10;PEX14;MDM2;TCAP;FERMT2	29	0.111111	2
GO:0042113	B cell activation	12/85	0.0285928	1.98512	7.05632	ITGB1;TPD52;HDAC5;ITGA4;FLT3;BANK1;CEBPG;RABL3;PLCG2;PTPRJ;CTPS1;SLC25A5	12	0.141176	3
GO:0043648	dicarboxylic acid metabolic process	9/57	0.0286534	2.2629	8.03892	PHYH;GCLC;MTRR;MTHFD1L;MDH1;SDHAF3;GPT2;GOT2;ME3	9	0.157895	1
GO:0008284	positive regulation of cell population proliferation	48/474	0.0296706	1.36689	4.80817	KMT2D;FLT1;FLT3;RTKN2;NOP2;HNRNPU;THBS1;PRDX3;PAK1;ERBB2;KDR;CTSH;PTK2B;STX4;RPRD1B;SOX9;SCN5A;CCN1;IL6R;HES5;MCTS1;SRPK2;PRMT1;NTRK3;FN1;SAAL1;HTR1A;SOX11;EMP2;LIFR;LAMB1;SIRT1;ADRA2A;WDR77;CLDN5;HCK;BMP2;CDK6;SFRP2;NR4A3;CCPG1;ID2;MDM2;FAM98B;CALR;SLC25A5;IL7R;DDR2	48	0.101266	4
GO:0061158	3'-UTR-mediated mRNA destabilization	4/16	0.0298293	4.01764	14.111	KHSRP;RC3H1;TARDBP;ZFP36L1	4	0.25	1
GO:0071384	cellular response to corticosteroid stimulus	4/16	0.0298293	4.01764	14.111	REST;FAM107A;HNRNPU;ZFP36L1	4	0.25	3
GO:0070593	dendrite self-avoidance	4/16	0.0298293	4.01764	14.111	ROBO4;CNTN6;PALLD;NPTN	4	0.25	4
GO:0006044	N-acetylglucosamine metabolic process	4/16	0.0298293	4.01764	14.111	EXTL2;GNPDA1;OGA;LARGE1	4	0.25	1
GO:0042475	odontogenesis of dentin-containing tooth	4/16	0.0298293	4.01764	14.111	FOXC1;BMP2;SCN5A;LRP6	4	0.25	4
GO:1900221	regulation of amyloid-beta clearance	4/16	0.0298293	4.01764	14.111	LRP1;SRF;CYP51A1;HMGCR	4	0.25	1
GO:0046320	regulation of fatty acid oxidation	4/16	0.0298293	4.01764	14.111	FABP3;NR4A3;PDK4;SOX9	4	0.25	1
GO:0016079	synaptic vesicle exocytosis	7/40	0.0308456	2.55878	8.90139	SNAP25;RAB3A;SYT2;DNAJC5;STX4;CPLX2;CPLX1	7	0.175	5
GO:0048010	vascular endothelial growth factor receptor signaling pathway	10/67	0.0309877	2.11769	7.3572	MAPK11;FLT1;NCF2;ITGB3;ABI1;KDR;HSPB1;PTK2B;CLEC14A;PIK3R1	10	0.149254	5
GO:0000398	mRNA splicing, via spliceosome	30/274	0.0311523	1.48856	5.16363	SF3B4;YTHDC1;SRRT;HNRNPU;RBM4B;CWC25;COIL;PTBP1;PABPN1;TRA2A;PAPOLA;POLR2F;SNRPB2;POLR2H;DDX17;SRPK2;SPEN;CPSF4;RBM14;PRPF4B;CDC40;WDR77;LSM8;HNRNPA2B1;RNPS1;SRSF4;SNRNP48;HNRNPH3;SRSF6;SRSF7	30	0.109489	1
GO:0045926	negative regulation of growth	16/126	0.0317628	1.75762	6.06282	NDRG3;JADE1;NAIF1;PTPRJ;SMARCA2;SIRT1;RTN4;SFRP2;BCL6;PPP2R1A;SESN2;PPT1;RACK1;NDUFS3;ENPP1;CCN3	16	0.126984	4
GO:0034332	adherens junction organization	8/49	0.0317704	2.35424	8.1203	CDH5;AFDN;CADM1;CADM2;CTNND1;CDH11;FERMT2;CDH7	8	0.163265	2
GO:0048660	regulation of smooth muscle cell proliferation	8/49	0.0317704	2.35424	8.1203	NDRG4;NR4A3;ELN;ID2;TRIB1;IL6R;THBS1;HES5	8	0.163265	4
GO:0071375	cellular response to peptide hormone stimulus	14/106	0.0319336	1.83819	6.33092	HDAC5;C2CD5;PARP1;INSIG2;ADCY4;PIK3R1;ADCY6;ZFP36L1;NR4A1;ADCY9;NR4A3;TBC1D4;RAB15;ENPP1	14	0.132075	3
GO:0045766	positive regulation of angiogenesis	15/116	0.0319544	1.79429	6.17855	ITGB1;FLT1;TIE1;HSPB1;PRKCA;KLF4;SIRT1;THBS1;HK2;CDH5;SFRP2;KDR;CTSH;TEK;SASH1	15	0.12931	4
GO:0008203	cholesterol metabolic process	11/77	0.0325588	2.01214	6.89099	PLPP6;FDPS;SQLE;INSIG2;PMVK;CYP51A1;DHCR24;HMGCR;LBR;SCARF1;LSS	11	0.142857	1
GO:0014068	positive regulation of phosphatidylinositol 3-kinase signaling	11/77	0.0325588	2.01214	6.89099	FLT1;FLT3;NTRK3;KDR;FN1;SOX9;PIK3R1;TEK;JAK2;SIRT1;EPOR	11	0.142857	5
GO:0035967	cellular response to topologically incorrect protein	6/32	0.0326499	2.78297	9.52307	DAXX;HSPA5;HSPB8;BAK1;HSPA2;HSPA13	6	0.1875	3
GO:0035987	endodermal cell differentiation	6/32	0.0326499	2.78297	9.52307	MMP14;ITGA4;LEO1;FN1;COL8A1;LAMB1	6	0.1875	4
GO:0022604	regulation of cell morphogenesis	6/32	0.0326499	2.78297	9.52307	MACF1;ARC;ZMYM4;CFL1;PDZD8;FERMT2	6	0.1875	4
GO:0061001	regulation of dendritic spine morphogenesis	6/32	0.0326499	2.78297	9.52307	CAMK2B;ARC;CFL1;LRP8;DBN1;CDK5R1	6	0.1875	4
GO:0006351	transcription, DNA-templated	25/221	0.0329422	1.5432	5.26694	GTF3C3;NFIX;RNMT;SUPT4H1;GLIS3;RSF1;DEAF1;LEO1;EPC1;POLR2F;ELOB;POLR2H;TAF9B;NELFE;RNGTT;PARP1;GTF2H1;TOPORS;CDK9;NFX1;MED20;TCEA2;TAF4B;RNPS1;ATF4	25	0.113122	1
GO:0061621	canonical glycolysis	5/24	0.0329547	3.17269	10.8272	PFKL;PGK1;ALDOB;HK2;PFKP	5	0.208333	1
GO:0055007	cardiac muscle cell differentiation	5/24	0.0329547	3.17269	10.8272	KDM6B;AKAP13;BMP2;CXADR;TCAP	5	0.208333	4
GO:0061718	glucose catabolic process to pyruvate	5/24	0.0329547	3.17269	10.8272	PFKL;PGK1;ALDOB;HK2;PFKP	5	0.208333	1
GO:0009395	phospholipid catabolic process	5/24	0.0329547	3.17269	10.8272	ABHD12;PNPLA6;GPCPD1;SMPDL3A;PLBD2	5	0.208333	1
GO:0150117	positive regulation of cell-substrate junction organization	5/24	0.0329547	3.17269	10.8272	KDR;PTPRJ;PIK3R1;TEK;FERMT2	5	0.208333	2
GO:1900745	positive regulation of p38MAPK cascade	5/24	0.0329547	3.17269	10.8272	BMP2;GADD45A;PRMT1;SASH1;GADD45G	5	0.208333	3
GO:0036503	ERAD pathway	12/87	0.0335411	1.93198	6.55903	FOXRED2;HSPA5;SGTB;SEL1L;DNAJC10;UBXN8;TRIM25;FBXO6;MAN1A1;RNF185;HSP90B1;UBE2J1	12	0.137931	3
GO:0045637	regulation of myeloid cell differentiation	10/68	0.0339264	2.08106	7.0414	KMT2D;CDK6;NR4A3;PRMT1;KMT2C;LEO1;PTK2B;THBS1;TNRC6A;TNRC6B	10	0.147059	4
GO:0050821	protein stabilization	21/179	0.0340178	1.60714	5.43353	WNT10B;USP36;CRTAP;STXBP4;MCM8;USP33;CTNND1;USP2;SEL1L;ANK2;PIK3R1;STK4;RTN4;CDC37;PEX6;RABL3;FLOT2;NAA16;CALR;TAF9B;PFN2	21	0.117318	1
GO:0006094	gluconeogenesis	7/41	0.0348195	2.48339	8.33817	G6PC3;MDH1;GOT2;PGK1;CRY1;ALDOB;ATF4	7	0.170732	1
GO:0060047	heart contraction	7/41	0.0348195	2.48339	8.33817	KCNH2;SGCD;TNNT2;TCAP;SCN5A;SGCZ;SCN1B	7	0.170732	3
GO:0006479	protein methylation	7/41	0.0348195	2.48339	8.33817	NSD3;TRMT112;PRMT8;PRMT2;PRMT1;FAM98B;CAMKMT	7	0.170732	1
GO:1902476	chloride transmembrane transport	8/50	0.0353716	2.29806	7.67977	GABRA2;GABRQ;GABRB2;GABRA1;GLRB;GABRA4;SLC1A1;SLC12A8	8	0.16	5
GO:0006171	cAMP biosynthetic process	3/10	0.0359765	5.16356	17.1683	ADCY9;ADCY4;ADCY6	3	0.3	1
GO:0050654	chondroitin sulfate proteoglycan metabolic process	3/10	0.0359765	5.16356	17.1683	CSGALNACT1;DSEL;PXYLP1	3	0.3	1
GO:0007549	dosage compensation	3/10	0.0359765	5.16356	17.1683	YTHDC1;HNRNPU;MACROH2A1	3	0.3	1
GO:0003158	endothelium development	3/10	0.0359765	5.16356	17.1683	KDM6B;KDR;EDF1	3	0.3	4
GO:0046479	glycosphingolipid catabolic process	3/10	0.0359765	5.16356	17.1683	NEU3;HEXB;HEXA	3	0.3	1
GO:0032288	myelin assembly	3/10	0.0359765	5.16356	17.1683	TENM4;GPC1;EPB41L3	3	0.3	4
GO:0042754	negative regulation of circadian rhythm	3/10	0.0359765	5.16356	17.1683	SUV39H2;CIPC;CRY1	3	0.3	4
GO:0050657	nucleic acid transport	3/10	0.0359765	5.16356	17.1683	ATXN2;RBFOX1;HNRNPA2B1	3	0.3	5
GO:0061003	positive regulation of dendritic spine morphogenesis	3/10	0.0359765	5.16356	17.1683	CAMK2B;LRP8;DBN1	3	0.3	4
GO:0031053	primary miRNA processing	3/10	0.0359765	5.16356	17.1683	HNRNPA2B1;SRRT;DGCR8	3	0.3	1
GO:1903115	regulation of actin filament-based movement	3/10	0.0359765	5.16356	17.1683	STC1;ANK2;SCN5A	3	0.3	5
GO:0070857	regulation of bile acid biosynthetic process	3/10	0.0359765	5.16356	17.1683	STARD4;NR1D1;SIRT1	3	0.3	1
GO:1900452	regulation of long-term synaptic depression	3/10	0.0359765	5.16356	17.1683	ARC;GRID2;MAPT	3	0.3	5
GO:1905521	regulation of macrophage migration	3/10	0.0359765	5.16356	17.1683	P2RY12;PTK2B;EMILIN1	3	0.3	5
GO:0035493	SNARE complex assembly	3/10	0.0359765	5.16356	17.1683	UVRAG;VAMP1;STXBP6	3	0.3	5
GO:0120036	plasma membrane bounded cell projection organization	16/128	0.0360428	1.72604	5.73572	CNTNAP2;BTG2;PRMT1;CDNF;BICDL1;LAMB1;CFAP126;MANF;GPRIN3;TBC1D24;MAPT;ATXN10;KIFAP3;LRP12;CDK16;CDK5R1	16	0.125	2
GO:0010976	positive regulation of neuron projection development	12/88	0.0362317	1.90645	6.32526	CAMK2B;NDRG4;KIDINS220;NTRK3;PLPPR5;NPTN;PTK2B;SCARF1;LRP8;SCN1B;DBN1;EPHA3	12	0.136364	4
GO:0043523	regulation of neuron apoptotic process	13/98	0.0366298	1.84695	6.10767	SRPK2;EPHA7;GRID2;EGLN3;KDM2B;FOXQ1;TOX3;SIX4;RASA1;PPT1;PTK2B;ATF4;CDK5R1	13	0.132653	3
GO:0008380	RNA splicing	13/98	0.0366298	1.84695	6.10767	SRPK2;SF3B4;TCERG1;PRPF4B;PTBP1;PPP2R1A;KHSRP;SRSF4;RNPS1;SNRNP48;HNRNPH3;TARDBP;SRSF7	13	0.132653	1
GO:0006397	mRNA processing	32/300	0.0366402	1.44563	4.78012	SF3B4;TCERG1;RNMT;YTHDC1;SRRT;SUPT4H1;HNRNPU;RBM4B;CWC25;PTBP1;PABPN1;TRA2A;PAPOLA;POLR2F;RPRD1B;SNRPB2;POLR2H;SPEN;CPSF4;RBM14;RNGTT;GTF2H1;PRPF4B;CDC40;LSM8;HNRNPA2B1;RNPS1;SRSF4;SNRNP48;HNRNPH3;SRSF6;SRSF7	32	0.106667	1
GO:0015749	monosaccharide transmembrane transport	4/17	0.0367011	3.70839	12.256	SLC2A9;SLC23A2;SLC5A3;SLC2A8	4	0.235294	5
GO:0046676	negative regulation of insulin secretion	4/17	0.0367011	3.70839	12.256	KLF7;REST;CCN3;ADRA2A	4	0.235294	5
GO:1902254	negative regulation of intrinsic apoptotic signaling pathway by p53 class mediator	4/17	0.0367011	3.70839	12.256	MDM2;TAF9B;SIRT1;ZNF385A	4	0.235294	3
GO:1903861	positive regulation of dendrite extension	4/17	0.0367011	3.70839	12.256	ITSN2;SYT3;SYT2;PLAA	4	0.235294	4
GO:0014742	positive regulation of muscle hypertrophy	4/17	0.0367011	3.70839	12.256	NR4A3;PARP1;PRKCA;PDE9A	4	0.235294	2
GO:2000648	positive regulation of stem cell proliferation	4/17	0.0367011	3.70839	12.256	HNRNPU;SOX11;N4BP2L2;FERMT2	4	0.235294	4
GO:0072091	regulation of stem cell proliferation	4/17	0.0367011	3.70839	12.256	HNRNPU;FBLN1;SOX11;ZFP36L1	4	0.235294	4
GO:0051338	regulation of transferase activity	4/17	0.0367011	3.70839	12.256	LDB1;EMP2;SPTSSB;LDB2	4	0.235294	1
GO:0065003	protein-containing complex assembly	29/267	0.0368005	1.47473	4.8699	DET1;KMT2D;TUBGCP2;SPG7;ADD2;SAMM50;OPA1;PPP2R1A;LEO1;LPXN;PTK2B;ELOB;RIPK1;SOX9;KIFAP3;MDN1;HES5;TRAPPC3;RSPH4A;TRAPPC2L;ST13;FN1;CHCHD10;PEX14;AFDN;MDM2;TCAP;PREB;FERMT2	29	0.108614	2
GO:0048699	generation of neurons	23/202	0.0370781	1.55397	5.1199	WNT10B;EMX1;FZD3;LDB1;TUBGCP2;CEP85L;BHLHE41;WNT7A;SOX11;POMGNT2;EML1;NEUROD1;CDK6;SIX4;ERBB2;ADNP2;LHX6;MAPT;KIAA0319;LRP12;HES5;SDCCAG8;CDK5R1	23	0.113861	4
GO:0061572	actin filament bundle organization	6/33	0.0374039	2.67975	8.8056	BAIAP2L2;CALD1;FAM107A;SHROOM2;NEDD9;ADD2	6	0.181818	2
GO:1901701	cellular response to oxygen-containing compound	34/323	0.0377131	1.42462	4.66954	CD274;KCNC2;AGAP3;ADCY6;HSP90B1;ZFP36L1;PRDX3;RAP1B;MAPK9;BRINP1;PABPN1;SESN2;NRIP1;PDK4;ADNP2;PDK3;MAPK1;PTK2B;SOX9;BRINP3;TGM2;P2RY12;WNT10B;JUN;NFKBIL1;NR1D1;FOS;FAM210B;NR4A3;PLAA;LCOR;MAPT;EPHA3;HCN1	34	0.105263	3
GO:0031124	mRNA 3'-end processing	11/79	0.038364	1.95275	6.3672	CPSF4;SCAF8;PABPN1;PAPOLA;LEO1;SRSF4;RPRD1B;RNPS1;SRSF6;SRSF7;CDC40	11	0.139241	1
GO:0043269	regulation of ion transport	11/79	0.038364	1.95275	6.3672	KCNJ6;SYT3;KCNJ10;SYT2;ITGB3;HTR1A;STC1;KCNJ16;KCNA5;YWHAH;KCNJ3	11	0.139241	5
GO:0061620	glycolytic process through glucose-6-phosphate	5/25	0.0386742	3.01389	9.80292	PFKL;PGK1;ALDOB;HK2;PFKP	5	0.2	1
GO:0043271	negative regulation of ion transport	5/25	0.0386742	3.01389	9.80292	ACTN2;STC1;PTK2B;HTR1B;ADRA2A	5	0.2	5
GO:0010830	regulation of myotube differentiation	5/25	0.0386742	3.01389	9.80292	HDAC5;MMP14;BHLHE41;PIEZO1;CCN3	5	0.2	4
GO:0000027	ribosomal large subunit assembly	5/25	0.0386742	3.01389	9.80292	MRPL20;BOP1;NOP2;PPAN;MDN1	5	0.2	2
GO:0007420	brain development	18/150	0.0389721	1.64796	5.34748	CNTNAP2;EMX1;EPHA7;NDRG4;EGR2;MKKS;TUBGCP2;SHROOM2;EML1;HSPG2;PBX1;ADGRG1;TMX2;DHX37;PPT1;HES5;CDK5RAP2;CDK5R1	18	0.12	4
GO:0030199	collagen fibril organization	12/89	0.0390715	1.88159	6.1008	CRTAP;ADAMTS3;P4HA1;COL5A3;COL5A2;SERPINH1;COL4A5;COL8A1;PLOD2;TLL1;P4HB;DDR2	12	0.134831	2
GO:0006892	post-Golgi vesicle-mediated transport	12/89	0.0390715	1.88159	6.1008	AP4M1;RAB14;AP1S2;AP1B1;EXOC6B;SORCS1;AP4S1;STX4;COMMD1;STXBP6;EXOC2;EXOC1	12	0.134831	5
GO:2001257	regulation of cation channel activity	12/89	0.0390715	1.88159	6.1008	ITGB1;CAMK2B;NETO1;HOMER1;KCNS1;ACTN2;PTK2B;ANK2;KCNAB1;CALM2;FGF12;GRIA3	12	0.134831	5
GO:0045600	positive regulation of fat cell differentiation	8/51	0.0392386	2.2445	7.2679	FNDC5;BMP2;SFRP2;ID2;HNRNPU;PTGS2;ZNF385A;ZFP36L1	8	0.156863	4
GO:0010632	regulation of epithelial cell migration	8/51	0.0392386	2.2445	7.2679	MACF1;PLCG2;CTSH;EMP2;SOX9;RTN4;SASH1;PFN2	8	0.156863	4
GO:0042060	wound healing	10/70	0.0403761	2.01148	6.45586	PPP3CA;MACF1;PAK1;RAB3A;ITGB3;SRF;ERBB2;MYH9;WNT7A;CFLAR	10	0.142857	3
GO:0045598	regulation of fat cell differentiation	11/80	0.0415213	1.92434	6.12238	WNT10B;BMP2;TRIO;SFRP2;ID2;ENPP1;NR1D1;SIRT1;ZNF385A;FERMT2;ZFP36L1	11	0.1375	4
GO:0045859	regulation of protein kinase activity	14/110	0.0419111	1.76122	5.58694	UVRAG;DAXX;PRKAG1;HSPB1;IQGAP1;SIRT1;LRP6;DEPTOR;ALS2;PTK2B;CCN1;TRIB1;YWHAG;DDR2	14	0.127273	1
GO:0043067	regulation of programmed cell death	22/194	0.0422996	1.54647	4.89144	TOMM70;USP36;DAXX;RARG;ACTN2;FLT3;BNIP3;SRA1;FBXO10;SIRT1;LRP8;RTN4;TOX3;BCL6;IRF3;CASP6;RIPK1;SOX9;CALR;JAK2;TARDBP;TGM2	22	0.113402	3
GO:0043537	negative regulation of blood vessel endothelial cell migration	6/34	0.0425778	2.5839	8.15589	HDAC5;RGCC;GADD45A;KLF4;THBS1;MAP2K5	6	0.176471	4
GO:0010823	negative regulation of mitochondrion organization	6/34	0.0425778	2.5839	8.15589	TFRC;OPA1;BNIP3;MPV17L;MAPT;SLC25A5	6	0.176471	2
GO:0001843	neural tube closure	6/34	0.0425778	2.5839	8.15589	MTHFD1L;KDM2B;DEAF1;SEMA4C;PRICKLE1;LRP6	6	0.176471	4
GO:0001667	ameboidal-type cell migration	8/52	0.0433777	2.19337	6.88237	SEMA4A;ITGA4;SEMA3D;SEMA4C;CCN3;SEMA4F;PKN2;AMOTL1	8	0.153846	5
GO:0006664	glycolipid metabolic process	8/52	0.0433777	2.19337	6.88237	CTSA;NEU3;PGAP1;HEXB;HEXA;ST3GAL4;ESYT2;FUT2	8	0.153846	1
GO:0048639	positive regulation of developmental growth	8/52	0.0433777	2.19337	6.88237	ITSN2;MACF1;GOLGA4;SYT3;SYT2;PLAA;MAPT;DBN1	8	0.153846	4
GO:0002040	sprouting angiogenesis	8/52	0.0433777	2.19337	6.88237	NR4A1;ANGPT1;ADGRA2;SRF;KDR;PTK2B;TEK;THBS1	8	0.153846	4
GO:0001933	negative regulation of protein phosphorylation	18/152	0.0435244	1.62319	5.08777	NTRK3;HSPB1;FBLN1;LDLRAD4;MACROH2A1;SAMSN1;LRP6;DNAJC3;DEPTOR;SFRP2;DNAJC10;RACK1;ENPP1;EMILIN1;TRIB1;TARDBP;CALM2;YWHAG	18	0.118421	1
GO:0071300	cellular response to retinoic acid	7/43	0.0437495	2.34517	7.33868	WNT10B;BRINP1;ADNP2;PTK2B;SOX9;BRINP3;EPHA3	7	0.162791	3
GO:0030239	myofibril assembly	7/43	0.0437495	2.34517	7.33868	CSRP2;SIX4;ACTN2;TNNT2;TMOD2;TCAP;CFLAR	7	0.162791	4
GO:0010613	positive regulation of cardiac muscle hypertrophy	4/18	0.0444061	3.44331	10.7238	NR4A3;PARP1;PRKCA;PDE9A	4	0.222222	2
GO:0045687	positive regulation of glial cell differentiation	4/18	0.0444061	3.44331	10.7238	EGR2;BMP2;TENM4;ID2	4	0.222222	4
GO:0090335	regulation of brown fat cell differentiation	4/18	0.0444061	3.44331	10.7238	FNDC5;HNRNPU;PTGS2;SIRT1	4	0.222222	4
GO:1903859	regulation of dendrite extension	4/18	0.0444061	3.44331	10.7238	ITSN2;SYT3;SYT2;PLAA	4	0.222222	4
GO:1901028	regulation of mitochondrial outer membrane permeabilization involved in apoptotic signaling pathway	4/18	0.0444061	3.44331	10.7238	MPV17L;CHCHD10;BAK1;SLC25A5	4	0.222222	5
GO:1902175	regulation of oxidative stress-induced intrinsic apoptotic signaling pathway	4/18	0.0444061	3.44331	10.7238	HSPB1;NME5;P4HB;SIRT1	4	0.222222	3
GO:0060307	regulation of ventricular cardiac muscle cell membrane repolarization	4/18	0.0444061	3.44331	10.7238	KCNH2;ANK2;SCN5A;SCN1B	4	0.222222	4
GO:0021782	glial cell development	5/26	0.0449616	2.87021	8.90325	EIF2B5;CDK6;MXRA8;SOX11;HES5	5	0.192308	4
GO:0070076	histone lysine demethylation	5/26	0.0449616	2.87021	8.90325	KDM5A;KDM6B;KDM2B;HR;KDM6A	5	0.192308	1
GO:0086010	membrane depolarization during action potential	5/26	0.0449616	2.87021	8.90325	KCNH2;SCN8A;SCN5A;SCN1B;YWHAH	5	0.192308	4
GO:0051224	negative regulation of protein transport	5/26	0.0449616	2.87021	8.90325	RSAD2;CYP51A1;ERP29;HMGCR;SERGEF	5	0.192308	5
GO:0032414	positive regulation of ion transmembrane transporter activity	5/26	0.0449616	2.87021	8.90325	TRPC6;SLC6A9;ACTN2;NDUFA4;ANK2	5	0.192308	5
GO:1905477	positive regulation of protein localization to membrane	13/101	0.045128	1.7837	5.52634	ITGB1;C2CD5;LRP1;PIK3R1;SLC5A3;PPP3R1;CNPY4;ERBB2;STX4;EPHA3;SPTBN1;YWHAG;YWHAH	13	0.128713	5
GO:0007268	chemical synaptic transmission	32/306	0.0460594	1.4135	4.35052	GABRB2;CHRM3;SNAP25;RAB3A;KCNA1;SLC1A1;SLC1A4;CPLX1;LRP6;GPR176;PENK;KCNMB4;KCNN1;MAPK1;GRIA3;GABRA2;GABRQ;GABRA1;GRID2;HOMER1;KCND2;GABRA4;GAD1;HTR1A;HTR1B;FCHSD1;GLRB;DNAJC5;KCNQ2;PCDHB6;TBC1D24;CBLN2	32	0.104575	5
GO:0050767	regulation of neurogenesis	9/62	0.0460616	2.04886	6.30594	SPEN;REST;SERPINF1;BHLHE41;WNT7A;SOX11;HOOK3;HES5;TGM2	9	0.145161	4
GO:0060055	angiogenesis involved in wound healing	3/11	0.0467086	4.51787	13.842	ITGB3;SRF;KDR	3	0.272727	4
GO:0048593	camera-type eye morphogenesis	3/11	0.0467086	4.51787	13.842	KDM2B;SHROOM2;LRP6	3	0.272727	4
GO:0055089	fatty acid homeostasis	3/11	0.0467086	4.51787	13.842	DGAT2;POLD1;SIRT1	3	0.272727	1
GO:0045651	positive regulation of macrophage differentiation	3/11	0.0467086	4.51787	13.842	ID2;PRKCA;RIPK1	3	0.272727	4
GO:0090083	regulation of inclusion body assembly	3/11	0.0467086	4.51787	13.842	SACS;HSPA2;SNCAIP	3	0.272727	2
GO:0048169	regulation of long-term neuronal synaptic plasticity	3/11	0.0467086	4.51787	13.842	CAMK2B;NETO1;NPTN	3	0.272727	5
GO:0031440	regulation of mRNA 3'-end processing	3/11	0.0467086	4.51787	13.842	LEO1;PAPOLA;ZFP36L1	3	0.272727	1
GO:0035914	skeletal muscle cell differentiation	3/11	0.0467086	4.51787	13.842	EGR2;SIX4;LEMD2	3	0.272727	4
GO:0061053	somite development	3/11	0.0467086	4.51787	13.842	SFRP2;SMO;SOX11	3	0.272727	4
GO:0048738	cardiac muscle tissue development	8/53	0.0477946	2.14451	6.52112	KDM6B;AKAP13;BMP2;SGCD;TCAP;SCN5A;SGCZ;TBX18	8	0.150943	4
GO:0050768	negative regulation of neurogenesis	6/35	0.0481792	2.49467	7.56589	REST;OMG;WNT7A;HOOK3;RTN4;YWHAH	6	0.171429	4
GO:0034765	regulation of ion transmembrane transport	6/35	0.0481792	2.49467	7.56589	KCNH2;CHRM3;KCNJ6;KCNJ10;KCNJ16;KCNJ3	6	0.171429	5
GO:0051147	regulation of muscle cell differentiation	6/35	0.0481792	2.49467	7.56589	CDK9;PTBP1;MAPK11;SRF;ID2;BNIP2	6	0.171429	4
GO:0032271	regulation of protein polymerization	6/35	0.0481792	2.49467	7.56589	FCHSD1;TPPP3;RASA1;MAPT;DBN1;PFN2	6	0.171429	2
GO:0032434	regulation of proteasomal ubiquitin-dependent protein catabolic process	13/102	0.0482425	1.76356	5.34625	DET1;COMMD1;PRICKLE1;RAD23B;XPO1;HECTD1;RNF217;SUMO2;MDM2;RACK1;ELOB;TRIB1;OGT	13	0.127451	1
GO:1901991	negative regulation of mitotic cell cycle phase transition	12/92	0.0485194	1.81074	5.47891	USP47;PSMA3;CDK6;RGCC;PRMT2;PSMB3;PSME3;FAM107A;JADE1;KLF4;PSMB8;ZFP36L1	12	0.130435	4
GO:0048562	embryonic organ morphogenesis	7/44	0.0487196	2.28166	6.89444	FBN2;NEUROD1;ALDH1A3;RARG;ID2;SOX11;FBN1	7	0.159091	4
GO:0065002	intracellular protein transmembrane transport	7/44	0.0487196	2.28166	6.89444	TOMM70;SEC61A1;C2CD5;HSPA5;PEX6;TIMM44;PEX14	7	0.159091	5
GO:0061014	positive regulation of mRNA catabolic process	7/44	0.0487196	2.28166	6.89444	BTG2;KHSRP;RC3H1;METTL16;TNRC6A;ZFP36L1;TNRC6B	7	0.159091	1
GO:0045669	positive regulation of osteoblast differentiation	7/44	0.0487196	2.28166	6.89444	FBN2;BMP2;SOX11;CCN1;IL6R;FERMT2;DDR2	7	0.159091	4
GO:2000351	regulation of endothelial cell apoptotic process	7/44	0.0487196	2.28166	6.89444	CDH5;RGCC;ANGPT1;ITGA4;KDR;TEK;THBS1	7	0.159091	3

## Sheet: GOBP.MDD
Term	Description	Ratio	P.value	Odds.Ratio	Combined.Score	Genes	Overlap	Ratio.value	Cluster
GO:0044782	cilium organization	51/228	7.08196e-13	3.68745	103.16	DYNC2I1;CEP126;TTC26;SNX10;TXNDC15;CDC14A;NUDCD3;TCTN1;DZIP1L;BBS9;KIFAP3;CFAP44;DYNC2H1;OFD1;IFT140;RFX2;RFX3;KIF24;SSTR3;ARMC2;RP2;MNS1;ATP6V0D1;CFAP54;CFAP61;RAB1A;MACIR;INTU;FAM149B1;ARL6;ARL3;DNAH5;HDAC6;TTBK2;IFT74;KIF3B;ARL13B;KIF3A;FLNA;POC1B;ATP6V1D;ODF2;CFAP70;SEPTIN6;IFT122;CPLANE1;AHI1;TTLL3;CEP162;DZIP1;CEP89	51	0.223684	1
GO:0060271	cilium assembly	62/314	9.12828e-13	3.16	87.6023	DYNC2I1;CEP126;TTC26;C2CD3;SNX10;TXNDC15;CDC14A;ACTR1A;NUDCD3;CNTRL;TCTN1;DZIP1L;BBS9;CFAP46;KIFAP3;CFAP44;DYNC2H1;OFD1;IFT140;TUBB;RFX2;RFX3;KIF24;SSTR3;TUBA4A;RP2;BBOF1;ZMYND10;ATP6V0D1;CFAP54;PAFAH1B1;RAB1A;MACIR;INTU;FAM149B1;DCTN2;ARL6;ARL3;DNAH5;CFAP206;HDAC6;TTBK2;IFT74;KIF3B;ARL13B;KIF3A;NPHP1;FLNA;POC1B;NPHP4;ATP6V1D;ODF2;CFAP70;SEPTIN6;IFT122;CPLANE1;AHI1;RSPH1;TTLL3;CEP162;DZIP1;CEP89	62	0.197452	1
GO:0006839	mitochondrial transport	19/56	9.16911e-09	6.47728	119.878	TOMM70;BCAP31;DNAJC19;BAD;MTX2;TIMM9;BNIP3;TIMM13;TIMM23;TOMM20;SLC25A16;PITRM1;TIMM17A;BCL2;MFN2;SLC25A5;TMEM14A;SLC25A4;BCL2L1	19	0.339286	2
GO:0120031	plasma membrane bounded cell projection assembly	49/278	1.17276e-08	2.72679	49.7947	DYNC2I1;CEP126;TTC26;SPEF1;SNX10;TXNDC15;CDC14A;NUDCD3;TCTN1;DZIP1L;ARFIP2;BBS9;CFAP44;DYNC2H1;OFD1;IFT140;RFX2;RFX3;EMP1;KIF24;SSTR3;RP2;ATP6V0D1;CFAP54;RAB1A;MACIR;INTU;FAM149B1;ARL6;ARL3;DNAH5;HDAC6;TTBK2;IFT74;KIF3B;ARL13B;KIF3A;FLNA;POC1B;ATP6V1D;CFAP70;SEPTIN6;IFT122;CPLANE1;AHI1;TTLL3;CEP162;DZIP1;CEP89	49	0.176259	1
GO:0070925	organelle assembly	59/425	2.28958e-06	2.05321	26.6653	CEP126;DYNC2I1;TTC26;SNX10;LIMD1;ZFYVE1;TXNDC15;CDC14A;NUDCD3;MAP1LC3A;TCTN1;SH3PXD2B;POGZ;DZIP1L;BBS9;CFAP44;OFD1;DYNC2H1;GABARAPL1;RBM14;IFT140;RFX2;RFX3;KIF24;SSTR3;RP2;ATP6V0D1;CFAP54;BECN1;RAB1A;MACIR;FAM149B1;INTU;ARL6;ARL3;DNAH5;FITM2;HDAC6;TTBK2;IFT74;ATXN2;ARL13B;KIF3B;KIF3A;FLNA;POC1B;ATP6V1D;CFAP70;PRRC2C;SEPTIN6;IFT122;CPLANE1;STAM;AHI1;TTLL3;CEP162;DZIP1;LSM14A;CEP89	59	0.138824	1
GO:0071456	cellular response to hypoxia	26/131	3.3168e-06	3.12683	39.4496	PSMD12;PSMD14;CUL2;LIMD1;ZFP36L1;PSMB4;PSMB5;PSMD3;LMNA;PGK1;EP300;PSMD1;PLK3;CREBBP;TIGAR;KCND2;BAD;BNIP3;ARNT;PINK1;RGCC;PSMA1;PSMC4;PSME3;PSME4;SCN2A	26	0.198473	3
GO:0035567	non-canonical Wnt signaling pathway	25/124	3.78902e-06	3.18763	39.7925	PSMD12;PSMD14;CLTC;PRICKLE1;CELSR1;PPP3CB;PSMB4;PARD6A;PSMB5;PSMD3;AP2S1;PSMD1;AP2M1;SMURF2;FZD7;NFATC1;TNRC6C;MOV10;PSMA1;PSMC4;PSME3;PSME4;AGO2;PLCB1;TNRC6B	25	0.201613	3
GO:0072655	establishment of protein localization to mitochondrion	14/48	6.30562e-06	5.17703	61.9901	BCAP31;DNAJC19;TOMM70;TIMM9;TIMM13;TIMM23;TOMM20;HK1;PINK1;GRPEL1;PITRM1;GRPEL2;TIMM17A;MFN2	14	0.291667	2
GO:0007007	inner mitochondrial membrane organization	14/49	8.22874e-06	5.02884	58.8771	TOMM70;ATP5PD;ATP5PB;MTX2;TIMM9;TIMM13;ATP5MC3;GHITM;MICOS13;ATP5F1D;ATP5F1A;ATP5F1B;OPA1;ATP5PO	14	0.285714	1
GO:0007006	mitochondrial membrane organization	11/32	1.08529e-05	6.57696	75.1817	OPA1;BAD;MTX2;BNIP3;BCL2;MFN2;GHITM;MICOS13;SLC25A5;SLC25A4;BCL2L1	11	0.34375	1
GO:0043039	tRNA aminoacylation	12/38	1.17181e-05	5.79745	65.8264	AARS1;HARS1;SARS1;NARS1;PPA1;IARS1;YARS1;CARS1;EEF1E1;FARSA;WARS1;FARSB	12	0.315789	4
GO:0042776	mitochondrial ATP synthesis coupled proton transport	8/17	1.19403e-05	11.1454	126.34	STOML2;ATP5F1A;ATP5PD;ATP5F1B;ATP5PB;ATP5PO;ATP5MC3;ATP5F1D	8	0.470588	4
GO:0015031	protein transport	51/369	1.23375e-05	2.03667	23.0202	RAB3C;RAB3A;CLTC;VLDLR;DENND10;ARL6IP5;TOM1;ARFIP2;VPS35;TMED1;ATP6V1E1;TRIM23;WLS;NDC1;NSF;ATP6V1G1;ATP6V0B;ATP6AP1;TANGO2;VPS33B;TBC1D9;SCAMP1;COPZ1;PREPL;ATP6V1B2;MYH9;ATP6V0D1;OPTN;ARF5;ATP6V1A;NAPB;RAB1A;RAB5B;ARL6;UNC93B1;NAPG;HDAC6;GGA3;KIF3B;KIF3A;STX4;STX2;RAB6A;ATP6V1D;ATP6V1C1;RABGAP1L;SNX17;RAB12;PPT1;UNC119;COPG1	51	0.138211	2
GO:0008286	insulin receptor signaling pathway	17/73	1.86435e-05	3.81999	41.5998	ATP6V1A;ATP6V0B;ATP6V1G1;ATP6AP1;IRS2;SORBS1;SOGA1;IGF1R;APC;AKT2;PDK4;ATP6V1B2;ATP6V1E1;ATP6V0D1;ATP6V1D;GPLD1;ATP6V1C1	17	0.232877	3
GO:0090175	regulation of establishment of planar polarity	19/88	1.95285e-05	3.46731	37.5982	PSMD12;SPEF1;PSMD14;SMURF2;FZD7;CLTC;PRICKLE1;CELSR1;PSMB4;PARD6A;PSMB5;PSMA1;PSMC4;PSME3;PSMD3;PSME4;AP2S1;PSMD1;AP2M1	19	0.215909	5
GO:0006464	cellular protein modification process	112/1025	2.02059e-05	1.57391	17.0132	ERO1A;RAB3A;MPI;DCAF5;TBK1;LGALS1;AKT2;PSMD3;PDK4;PSMD1;PDK3;CCN1;PRKACB;FBXO9;CDKL2;FBXW4;ACVR1;RAB2A;IGFBP5;FBXW11;FBXO17;SHISA5;UBE2E2;PASK;KLHL42;ILF3;PRKAR1B;CCNE1;PSME3;PSME4;MXRA8;TRIB1;LIPT1;PSMD12;PSMD14;CUL2;KLHL11;COPS7A;ZC3HAV1;MTMR4;STK4;MTMR6;MTMR7;UGCG;NAE1;TGFB2;DMPK;TIPARP;CLK2;CDK9;PTPRE;COPS3;PPP5C;UBLCP1;FBXL2;CDK12;CDK14;FGFR1;RET;DYRK3;NGLY1;CHM;PTPRJ;LAMC1;PTPRF;SERP2;PPP3C…	112	0.109268	4
GO:0061512	protein localization to cilium	11/35	2.8523e-05	5.7539	60.2134	TTC26;FAM149B1;ARL6;IFT140;ARL3;TCTN1;BBS9;IFT122;SNX10;NPHP4;ATP6V1D	11	0.314286	2
GO:0015986	ATP synthesis coupled proton transport	8/19	3.2449e-05	9.11801	94.2423	STOML2;ATP5F1A;ATP5PD;ATP5F1B;ATP5PB;ATP5PO;ATP5MC3;ATP5F1D	8	0.421053	4
GO:0006626	protein targeting to mitochondrion	14/55	3.48211e-05	4.29152	44.0537	MIPEP;TOMM70;BCAP31;DNAJC19;TIMM9;TIMM13;TIMM23;TOMM20;GRPEL1;PITRM1;GRPEL2;TIMM17A;PMPCB;MFN2	14	0.254545	1
GO:0098779	positive regulation of mitophagy in response to mitochondrial depolarization	5/7	4.13329e-05	31.2948	315.885	PRKN;PINK1;MFN2;HDAC6;OPTN	5	0.714286	4
GO:0060071	Wnt signaling pathway, planar cell polarity pathway	18/85	4.21772e-05	3.38093	34.0583	PSMD12;PSMD14;SMURF2;FZD7;CLTC;PRICKLE1;CELSR1;PSMB4;PARD6A;PSMB5;PSMA1;PSMC4;PSME3;PSMD3;PSME4;AP2S1;PSMD1;AP2M1	18	0.211765	5
GO:0010506	regulation of autophagy	35/231	4.22561e-05	2.25771	22.7392	PRKN;ATP6V1A;USP36;CISD2;MTMR9;MTMR4;SOGA1;HDAC6;UCHL1;EP300;WDR6;VPS35;ATP6V1E1;DNM1L;DRAM2;ATP6V1D;TRIM65;ATP6V1C1;ATP6V1G1;ATP6V0B;BAD;BNIP3;RAB39B;RRAGA;DAP;PINK1;RRAGC;BCL2;ATP6V1B2;VDAC1;FBXL2;ATP6V0D1;LAMTOR3;MET;OPTN	35	0.151515	4
GO:0006418	tRNA aminoacylation for protein translation	12/43	4.69025e-05	4.86106	48.4523	AARS1;HARS1;SARS1;NARS1;PPA1;IARS1;YARS1;CARS1;EEF1E1;FARSA;WARS1;FARSB	12	0.27907	4
GO:0002478	antigen processing and presentation of exogenous peptide antigen	20/103	6.02397e-05	3.03394	29.4813	SEC23A;DCTN2;CLTC;KIF23;KLC1;DYNC1LI1;KIF18A;ACTR1A;MFSD6;ACTR1B;KIF3B;KIF3A;CAPZA2;AP2S1;CTSF;KIFAP3;ACTR10;AP2M1;DYNC1I1;LGMN	20	0.194175	3
GO:0016241	regulation of macroautophagy	21/112	6.80381e-05	2.9063	27.8873	ATP6V1A;USP36;ATP6V1G1;SMG1;ATP6V0B;BNIP3;HDAC6;RRAGA;UCHL1;PINK1;TBK1;RRAGC;SESN2;ATP6V1B2;VPS35;ATP6V1E1;ATP6V0D1;ATP6V1D;LAMTOR3;ATP6V1C1;PAFAH1B2	21	0.1875	4
GO:0032869	cellular response to insulin stimulus	23/129	7.10078e-05	2.73417	26.1188	ATP6V1A;ATP6V1G1;ATP6V0B;GOT1;ATP6AP1;INSIG2;IRS2;SORBS1;SOGA1;IGF1R;ZFP36L1;PKM;APC;AKT2;RAB12;PDK4;ATP6V1B2;ATP6V1E1;ATP6V0D1;ATP6V1D;GPLD1;ATP6V1C1;SLC27A4	23	0.178295	3
GO:0031146	SCF-dependent proteasomal ubiquitin-dependent protein catabolic process	18/89	7.98128e-05	3.18977	30.0981	FBXW4;PSMD12;PSMD14;FBXW11;FBXO17;CUL2;FBXL15;AMN1;PSMB4;PSMB5;PSMA1;PSMC4;PSME3;PSMD3;PSME4;PSMD1;FBXL2;FBXO9	18	0.202247	4
GO:0007005	mitochondrion organization	28/175	9.17778e-05	2.40306	22.3392	PRKN;STOML2;ALAS1;TIMM9;TIMM13;NRF1;MIEF1;PHB2;TOMM20;ATP5F1B;PITRM1;OPA1;TIMM17A;MFN2;DNM1L;DNAJC19;TOMM70;BCAP31;PTCD2;MIGA1;MTX2;BNIP3;TIMM23;ATP5F1D;PINK1;WDR81;SLC25A4;BCL2L1	28	0.16	1
GO:0019886	antigen processing and presentation of exogenous peptide antigen via MHC class II	19/98	9.32329e-05	3.02677	28.0896	SEC23A;DCTN2;CLTC;KIF23;KLC1;DYNC1LI1;KIF18A;ACTR1A;ACTR1B;KIF3B;KIF3A;CAPZA2;AP2S1;CTSF;KIFAP3;ACTR10;AP2M1;DYNC1I1;LGMN	19	0.193878	3
GO:0015985	energy coupled proton transport, down electrochemical gradient	6/12	0.000103288	12.5237	114.942	ATP5F1A;ATP5PD;ATP5PB;ATP5PO;ATP5MC3;ATP5F1D	6	0.5	1
GO:0002495	antigen processing and presentation of peptide antigen via MHC class II	19/100	0.000123586	2.95171	26.5612	SEC23A;DCTN2;CLTC;KIF23;KLC1;DYNC1LI1;KIF18A;ACTR1A;ACTR1B;KIF3B;KIF3A;CAPZA2;AP2S1;CTSF;KIFAP3;ACTR10;AP2M1;DYNC1I1;LGMN	19	0.19	3
GO:0016052	carbohydrate catabolic process	11/41	0.000142838	4.60163	40.7419	NEU3;LDHA;TPI1;PKM;NEU1;PGK1;MAN2C1;ENO2;PFKM;ENO4;HK1	11	0.268293	4
GO:0006094	gluconeogenesis	11/41	0.000142838	4.60163	40.7419	TPI1;GOT1;MDH1;MDH2;GOT2;PGK1;ENO2;SLC37A4;SLC25A12;SLC25A11;ATF4	11	0.268293	4
GO:0051452	intracellular pH reduction	10/35	0.000161405	5.01791	43.8144	ATP6V1A;ATP6V0B;ATP6V1G1;DMXL2;ATP6V1B2;TMEM9;ATP6V1E1;ATP6V0D1;ATP6V1D;ATP6V1C1	10	0.285714	3
GO:0033572	transferrin transport	10/36	0.000208741	4.82465	40.8861	ATP6V1A;ATP6V0B;ATP6V1G1;ATP6AP1;CLTC;ATP6V1B2;ATP6V1E1;ATP6V0D1;ATP6V1D;ATP6V1C1	10	0.277778	2
GO:0070125	mitochondrial translational elongation	17/89	0.000258009	2.96853	24.5275	GADD45GIP1;TSFM;MRPS16;MRPS11;MRPS33;MRPS23;MRPS10;MRPS21;MRPL14;MRPL37;MRPL15;MRPL10;MRPL21;MRPL33;MRPL44;MRPL3;MRPL1	17	0.191011	4
GO:0090141	positive regulation of mitochondrial fission	7/19	0.000277557	7.30806	59.8492	PRKN;PINK1;BNIP3;SPIRE1;VPS35;MIEF1;DNM1L	7	0.368421	1
GO:0030150	protein import into mitochondrial matrix	7/19	0.000277557	7.30806	59.8492	DNAJC19;TOMM70;GRPEL1;GRPEL2;TIMM17A;TIMM23;TOMM20	7	0.368421	1
GO:0019319	hexose biosynthetic process	11/44	0.000282134	4.18262	34.1851	TPI1;GOT1;MDH1;MDH2;GOT2;PGK1;ENO2;SLC37A4;SLC25A12;SLC25A11;ATF4	11	0.25	4
GO:0000209	protein polyubiquitination	41/314	0.000292693	1.89868	15.4484	PRKN;PSMD12;TRAF3IP2;CBFB;PSMD14;RNF14;PELI3;FBXO28;PRPF19;RNF115;PSMB4;RNF213;PSMB5;PSMD3;PSMD1;RBBP6;MARCHF6;FBXO9;HERC6;FBXW4;MYLIP;ANAPC7;SMURF2;FBXW11;FBXO17;UBE2E2;UBE2QL1;WWP2;FBXL15;KLHL42;RNF146;RNF126;KBTBD6;PSMA1;PSMC4;PSME3;PSME4;UBE2V2;BCL2;UBE2O;DTL	41	0.130573	4
GO:0034198	cellular response to amino acid starvation	15/74	0.000298645	3.19432	25.9259	ATP6V1A;ATP6V0B;ATP6V1G1;WDR59;RRAGA;DAP;RRAGC;SESN2;ATP6V1B2;ATP6V1E1;ATP6V0D1;ATP6V1D;LAMTOR3;ATP6V1C1;ATF4	15	0.202703	3
GO:0003341	cilium movement	12/52	0.000338491	3.76549	30.0901	DNAI4;CFAP61;CFAP251;ODAD3;CFAP100;DNAH1;SPEF1;DNAH5;CFAP70;CFAP91;CFAP206;CFAP54	12	0.230769	1
GO:0061418	regulation of transcription from RNA polymerase II promoter in response to hypoxia	15/75	0.000348075	3.14091	25.0114	PSMD12;CREBBP;PSMD14;CUL2;ARNT;LIMD1;PSMB4;PSMB5;PSMA1;PSMC4;PSME3;PSMD3;PSME4;EP300;PSMD1	15	0.2	4
GO:1990928	response to amino acid starvation	15/75	0.000348075	3.14091	25.0114	ATP6V1A;ATP6V0B;ATP6V1G1;WDR59;RRAGA;DAP;RRAGC;SESN2;ATP6V1B2;ATP6V1E1;ATP6V0D1;ATP6V1D;LAMTOR3;ATP6V1C1;ATF4	15	0.2	3
GO:0006996	organelle organization	51/420	0.000349025	1.75026	13.9327	DYRK3;ALAS1;LIMD1;PHB2;ARHGAP4;SMPD4;OPA1;CFL1;TMED1;DNM1L;KIFAP3;RAB2A;DYNC2H1;VPS18;MREG;TANGO2;ANK1;GEM;ARMC2;PEX7;KIF9;WDR81;MNS1;OPTN;CFAP61;PRKN;RAB1A;STOML2;PEX11B;NEDD9;FITM2;THY1;NRF1;DNAJC28;NCKIPSD;ATP5F1B;KIF3A;PACSIN2;STX4;SPTSSB;EPS15;LNPK;CHGA;PTCD2;ODF2;MTX2;MICAL3;FMNL3;PINK1;REEP5;RAB3GAP1	51	0.121429	1
GO:0044772	mitotic cell cycle phase transition	30/209	0.000376861	2.11365	16.6632	KHDRBS1;USP37;DCTN2;CCNH;CUL2;ACTR1A;PPME1;CNTRL;POLE;ACVR1;OFD1;PLK3;CDKN2C;ANAPC7;FBXW11;ODF2;TUBB;CDC7;FBXL15;INHBA;TUBA4A;LATS1;WEE1;LATS2;CCNE1;PPP2R2D;PLCB1;CDK14;OPTN;PAFAH1B1	30	0.143541	6
GO:0032802	low-density lipoprotein particle receptor catabolic process	5/10	0.000410271	12.5159	97.6076	MYLIP;CLTC;AP2S1;VLDLR;AP2M1	5	0.5	4
GO:0032799	low-density lipoprotein receptor particle metabolic process	5/10	0.000410271	12.5159	97.6076	MYLIP;CLTC;AP2S1;VLDLR;AP2M1	5	0.5	4
GO:0030218	erythrocyte differentiation	11/46	0.000427849	3.94319	30.5863	KMT2E;TGFBR3;MED1;DYRK3;ALAS1;ACIN1;INHBA;SLC25A5;JAK3;LYAR;SH2B3	11	0.23913	5
GO:0045652	regulation of megakaryocyte differentiation	12/54	0.000490076	3.58579	27.3271	KMT2E;CNOT4;TNRC6C;KMT2D;MOV10;NR4A3;CBFB;KMT2C;DPY30;EP300;CIB1;TNRC6B	12	0.222222	5
GO:0016567	protein ubiquitination	60/525	0.000551162	1.63565	12.273	RNF14;FBXO28;PRPF19;RNF157;RNF115;PSMD3;PSMD1;FBXO9;HERC6;TRIM23;FBXW4;VPS18;MYLIP;ANAPC7;USP5;FBXW11;FBXO17;MSL2;UBE2E2;UBE2QL1;PJA2;KLHL42;RNF126;RRAGA;PSMA1;TRIM17;PSME3;PSME4;UBE2V2;DTL;PRKN;MARCHF2;PSMD12;CBFB;PSMD14;PELI3;CUL2;KLHL12;DTX4;CAND2;VCPIP1;PSMB4;RNF213;PSMB5;RBBP6;MARCHF3;MARCHF6;SMURF2;WWP2;FBXL15;RNF146;CNOT4;PINK1;PSMC4;KLHL8;BCL2;UBE2O;TRIM37;FBXL2;ASB5	60	0.114286	4
GO:0097711	ciliary basal body-plasma membrane docking	17/95	0.00057224	2.73929	20.4514	OFD1;C2CD3;DCTN2;ODF2;TUBB;KIF24;TUBA4A;TTBK2;AHI1;ACTR1A;CNTRL;TCTN1;NPHP1;CEP162;NPHP4;PAFAH1B1;CEP89	17	0.178947	1
GO:0006090	pyruvate metabolic process	12/55	0.000585094	3.50221	26.0695	LDHA;TPI1;PKM;NR4A3;PGK1;VDAC1;HOGA1;HAGH;ENO2;PFKM;ENO4;HK1	12	0.218182	4
GO:0043618	regulation of transcription from RNA polymerase II promoter in response to stress	16/87	0.000601718	2.83148	20.9975	PSMD12;CREBBP;PSMD14;CUL2;ARNT;LIMD1;PSMB4;PSMB5;PSMA1;PSMC4;PSME3;PSMD3;PSME4;EP300;PSMD1;ATF4	16	0.183908	4
GO:0044843	cell cycle G1/S phase transition	13/63	0.000619383	3.26387	24.1095	ACVR1;KHDRBS1;PLK3;USP37;CDKN2C;CCNH;CUL2;CDC7;INHBA;LATS1;LATS2;CCNE1;POLE	13	0.206349	6
GO:0006415	translational termination	17/96	0.000648171	2.70447	19.8545	GADD45GIP1;MRPS16;MRPS11;MRPS33;MRPS23;MRPS10;MRPS21;MRPL14;MRPL37;MRPL15;APEH;MRPL10;MRPL21;MRPL33;MRPL44;MRPL3;MRPL1	17	0.177083	4
GO:0032543	mitochondrial translation	18/105	0.000680933	2.60088	18.9658	GADD45GIP1;TSFM;HARS1;MRPS16;MRPS11;MRPS33;MRPS23;MRPS10;MRPS21;MRPL14;MRPL15;MRPL37;MRPL10;MRPL21;MRPL33;MRPL44;MRPL3;MRPL1	18	0.171429	4
GO:0010976	positive regulation of neuron projection development	16/88	0.000685662	2.79201	20.3401	RET;NDRG4;RETREG3;STMN2;TWF2;VLDLR;RIT2;DPYSL3;NPTN;EP300;PLXNB2;SERPINI1;TOX;SCARF1;SCN1B;EPHA3	16	0.181818	1
GO:1904862	inhibitory synapse assembly	5/11	0.00070624	10.4293	75.6707	NPAS4;GABRA1;GABRB2;CBLN4;GABRG2	5	0.454545	1
GO:0042407	cristae formation	8/28	0.000730664	5.01247	36.1978	ATP5F1A;ATP5F1B;ATP5PD;ATP5PB;ATP5PO;ATP5MC3;MICOS13;ATP5F1D	8	0.285714	1
GO:0090383	phagosome acidification	8/28	0.000730664	5.01247	36.1978	ATP6V1A;ATP6V0B;ATP6V1G1;ATP6V1B2;ATP6V1E1;ATP6V0D1;ATP6V1D;ATP6V1C1	8	0.285714	1
GO:0035108	limb morphogenesis	7/22	0.00077113	5.8455	41.8985	FBXW4;SKI;TGFB2;CYP26B1;NIPBL;SHH;GLI3	7	0.318182	5
GO:0070126	mitochondrial translational termination	16/89	0.000779394	2.75361	19.7076	GADD45GIP1;MRPS16;MRPS11;MRPS33;MRPS23;MRPS10;MRPS21;MRPL14;MRPL37;MRPL15;MRPL10;MRPL21;MRPL33;MRPL44;MRPL3;MRPL1	16	0.179775	4
GO:0042789	mRNA transcription by RNA polymerase II	4/7	0.000880509	16.6784	117.333	MED1;TFCP2;ZBTB1;ATF4	4	0.571429	4
GO:0046113	nucleobase catabolic process	4/7	0.000880509	16.6784	117.333	DPYSL4;DPYD;DPYSL3;CRMP1	4	0.571429	4
GO:0036296	response to increased oxygen levels	4/7	0.000880509	16.6784	117.333	ATP6V1A;ATP6V1G1;ATP6AP1;ATP6V0D1	4	0.571429	3
GO:0006096	glycolytic process	8/29	0.000944035	4.77352	33.2492	LDHA;TPI1;PKM;PGK1;ENO2;PFKM;ENO4;HK1	8	0.275862	4
GO:0030326	embryonic limb morphogenesis	9/36	0.000999918	4.17831	28.8631	FBXW4;SKI;CYP26B1;NIPBL;SHH;CREBBP;TGFB2;INTU;GLI3	9	0.25	5
GO:0072529	pyrimidine-containing compound catabolic process	6/17	0.00100117	6.82925	47.1668	DPYSL4;DPYD;DPYSL3;TET2;CRMP1;UPP1	6	0.352941	4
GO:0047496	vesicle transport along microtubule	7/23	0.00103808	5.47986	37.6487	RAB1A;KIF3B;FBXW11;KIF3A;KIFAP3;DYNC1I1;PAFAH1B1	7	0.304348	2
GO:1901991	negative regulation of mitotic cell cycle phase transition	16/92	0.00112861	2.64449	17.9475	PSMD12;CDKN2C;PSMD14;FAM107A;ZFP36L1;PSMB4;WEE1;PSMB5;RGCC;PSMA1;APC;PSMC4;PSME3;PSMD3;PSME4;PSMD1	16	0.173913	6
GO:0009299	mRNA transcription	5/12	0.00113692	8.93895	60.601	MED1;DDX5;TFCP2;ZBTB1;ATF4	5	0.416667	4
GO:0010975	regulation of neuron projection development	24/165	0.00114873	2.14223	14.501	RTN4R;NTNG1;RET;MYLIP;NDRG4;RETREG3;ULK4;STMN2;TWF2;CRMP1;CIB1;RIT2;CFL1;DPYSL3;CHN1;NPTN;EP300;PLXNB2;SERPINI1;TOX;SCARF1;CAMK2G;SCN1B;EPHA3	24	0.145455	1
GO:0070534	protein K63-linked ubiquitination	10/44	0.00118262	3.68784	24.8561	PRKN;RNF115;RNF126;TRAF3IP2;PELI3;UBE2V2;UBE2E2;UBE2O;WWP2;PRPF19	10	0.227273	4
GO:0050433	regulation of catecholamine secretion	8/30	0.00120451	4.55629	30.626	PRKN;CHGA;SYT4;SYT3;SYT1;SYT11;KCNA2;SYT13	8	0.266667	2
GO:0032418	lysosome localization	9/37	0.00123544	4.02886	26.9786	CHGA;RAB3A;NR4A3;BLOC1S2;VPS33B;S100A13;MYH9;FAM98A;HDAC6	9	0.243243	2
GO:0090382	phagosome maturation	9/37	0.00123544	4.02886	26.9786	ATP6V1A;ATP6V0B;ATP6V1G1;MREG;ATP6V1B2;ATP6V1E1;ATP6V0D1;ATP6V1D;ATP6V1C1	9	0.243243	1
GO:0006890	retrograde vesicle-mediated transport, Golgi to endoplasmic reticulum	15/85	0.0013661	2.69075	17.7477	NSF;RAB1A;KIF23;KLC1;COPZ1;DNAJC28;KIF18A;KIF3B;KIF3A;COPG1;KIFAP3;RAB6A;ATP9B;ARF5;COPE	15	0.176471	2
GO:0061621	canonical glycolysis	7/24	0.00137255	5.15723	33.9918	TPI1;PKM;PGK1;ENO2;PFKM;PFKP;HK1	7	0.291667	4
GO:0061718	glucose catabolic process to pyruvate	7/24	0.00137255	5.15723	33.9918	TPI1;PKM;PGK1;ENO2;PFKM;PFKP;HK1	7	0.291667	4
GO:1903844	regulation of cellular response to transforming growth factor beta stimulus	7/24	0.00137255	5.15723	33.9918	LATS1;TGFBR3;EID2;LATS2;SMURF2;LTBP4;NREP	7	0.291667	3
GO:0006470	protein dephosphorylation	21/139	0.00140307	2.23802	14.7017	DUSP4;DUSP5;PTPN18;PPM1L;EYA1;FBXW11;PPP2R5B;PTPRJ;PPP2R5D;DUSP18;MTMR4;MTMR6;PTPRF;MTMR7;DUSP7;PPP2CA;PTPRE;PPP5C;PPP3CB;UBLCP1;PPP2R2D	21	0.151079	4
GO:0034613	cellular protein localization	40/329	0.00140534	1.74707	11.4738	NAPB;RAB1A;RAB5B;ARL6;UNC93B1;CLTC;PRPF19;CELSR1;NAPG;HDAC6;NIPBL;GGA3;EPB41L3;SH3PXD2B;NPHP1;ARFIP2;FLNA;MFN2;VPS35;TMED1;STX4;STX2;RAB6A;TRIM23;WLS;NSF;RABGAP1L;VPS33B;SEPTIN6;TBC1D9;COPZ1;AHI1;RRAGA;OCLN;RRAGC;SNX17;CROCC;ESAM;LAMTOR3;ARF5	40	0.121581	2
GO:0001578	microtubule bundle formation	10/45	0.0014209	3.58228	23.4871	TTC26;CLIP1;RSPH1;TPPP3;PSRC1;SPEF1;TTLL3;CFAP46;NAV1;CFAP206	10	0.222222	1
GO:0009267	cellular response to starvation	23/158	0.00142423	2.14345	14.0484	ATP6V1A;HSPA8;BECN1;NIM1K;ATP6V1G1;GABARAPL1;ATP6V0B;WDR59;CARTPT;ZFYVE1;RRAGA;DAP;MAP1LC3A;RRAGC;SESN2;PDK4;ATP6V1B2;ATP6V1E1;ATP6V0D1;ATP6V1D;LAMTOR3;ATP6V1C1;ATF4	23	0.14557	3
GO:0006414	translational elongation	17/104	0.00162972	2.45472	15.7577	GADD45GIP1;TSFM;MRPS16;MRPS11;MRPS33;MRPS23;MRPS10;MRPS21;MRPL14;MRPL15;MRPL37;MRPL10;MRPL21;MRPL33;MRPL44;MRPL3;MRPL1	17	0.163462	4
GO:0006208	pyrimidine nucleobase catabolic process	4/8	0.00165757	12.5081	80.0819	DPYSL4;DPYD;DPYSL3;CRMP1	4	0.5	4
GO:0035113	embryonic appendage morphogenesis	5/13	0.00173514	7.82116	49.7165	FBXW4;SKI;TGFB2;CYP26B1;SHH	5	0.384615	5
GO:0035331	negative regulation of hippo signaling	5/13	0.00173514	7.82116	49.7165	WWC1;DLG5;WWC2;LIMD1;MAPK14	5	0.384615	3
GO:0006006	glucose metabolic process	12/62	0.00178044	3.01076	19.0608	TPI1;GOT1;MDH1;MDH2;GOT2;PGK1;IRS2;ENO2;SLC37A4;SLC25A12;SLC25A11;ATF4	12	0.193548	4
GO:0061620	glycolytic process through glucose-6-phosphate	7/25	0.00178554	4.87046	30.8204	TPI1;PKM;PGK1;ENO2;PFKM;PFKP;HK1	7	0.28	4
GO:0046856	phosphatidylinositol dephosphorylation	7/25	0.00178554	4.87046	30.8204	SYNJ1;MTMR11;SACM1L;MTMR9;MTMR4;MTMR6;MTMR7	7	0.28	4
GO:0032801	receptor catabolic process	7/25	0.00178554	4.87046	30.8204	BECN1;MYLIP;CLTC;AP2S1;VLDLR;AP2M1;LGMN	7	0.28	4
GO:0014059	regulation of dopamine secretion	7/25	0.00178554	4.87046	30.8204	PRKN;SYT4;SYT3;SYT1;SYT11;KCNA2;SYT13	7	0.28	2
GO:0090140	regulation of mitochondrial fission	7/25	0.00178554	4.87046	30.8204	PRKN;PINK1;BNIP3;SPIRE1;VPS35;MIEF1;DNM1L	7	0.28	1
GO:0035967	cellular response to topologically incorrect protein	8/32	0.00189551	4.17615	26.1772	PRKN;HSPA8;PACRG;DNAJB14;HSPA13;HDAC6;OPTN;DNAJC18	8	0.25	3
GO:0044743	protein transmembrane import into intracellular organelle	8/32	0.00189551	4.17615	26.1772	DNAJC19;TOMM70;PEX7;GRPEL1;GRPEL2;TIMM17A;TIMM23;TOMM20	8	0.25	2
GO:0000377	RNA splicing, via transesterification reactions with bulged adenosine as nucleophile	32/251	0.00189819	1.84128	11.539	DDX5;HNRNPU;SNU13;PRPF19;PQBP1;PTBP1;PCF11;POLR2B;POLR2C;TRA2A;POLR2H;RBM6;SRRM2;SPEN;CPSF4;HSPA8;RBM14;SNRPN;FUS;RBM19;U2SURP;SRRM1;LSM2;SFPQ;DDX39B;NOVA1;HNRNPA2B1;HNRNPD;HNRNPH3;SNRNP25;SRSF5;SF1	32	0.12749	4
GO:0043687	post-translational protein modification	41/345	0.00190075	1.70216	10.6649	RAB1A;PSMD12;RAB3A;ITIH2;PSMD14;CUL2;ASB13;CHM;KLHL11;COPS7A;LAMC1;DCAF5;PSMB4;LGALS1;PSMB5;PSMD3;PSMD1;TIMP1;NAE1;CCN1;FBXO9;FBXW4;RAB2A;IGFBP5;FBXW11;FBXO17;FN3KRP;SHISA5;FBXL15;CKAP4;KLHL42;COPS3;KBTBD6;PSMA1;PSMC4;PSME3;PSME4;MXRA8;ASB5;MFGE8;DTL	41	0.118841	4
GO:1903146	regulation of autophagy of mitochondrion	6/19	0.00192993	5.77797	36.1139	PRKN;USP36;PINK1;VDAC1;DNM1L;HDAC6	6	0.315789	4
GO:0046902	regulation of mitochondrial membrane permeability	6/19	0.00192993	5.77797	36.1139	BAD;BNIP3;BCL2;SLC25A5;SLC25A4;BCL2L1	6	0.315789	1
GO:0030178	negative regulation of Wnt signaling pathway	26/191	0.00194624	1.98331	12.3796	PRKN;PSMD12;PSMD14;NXN;KLHL12;PRICKLE1;STK4;LIMD1;GLI3;PSMB4;RNF213;PSMB5;PSMD3;PSMD1;NPHP4;WWOX;TPBG;NFATC1;SHISA2;LATS1;LATS2;PSMA1;APC;PSMC4;PSME3;PSME4	26	0.136126	3
GO:0016311	dephosphorylation	22/153	0.00209385	2.11187	13.0276	DUSP4;DUSP5;PTPN18;PPM1L;FBXW11;PNKP;PPP2R5B;PTPRJ;PPP2R5D;DUSP18;MTMR4;MTMR6;PTPRF;SGPP1;MTMR7;DUSP7;PPP2CA;PTPRE;PPP5C;PPP3CB;UBLCP1;PSPH	22	0.143791	4
GO:0000398	mRNA splicing, via spliceosome	34/274	0.0022018	1.78559	10.9251	DDX5;DDX1;HNRNPU;SNU13;PRPF19;PQBP1;PTBP1;PCF11;POLR2B;POLR2C;TRA2A;POLR2H;RBM6;SRRM2;SPEN;CPSF4;HSPA8;RBM14;SNRPN;FUS;RBM19;SNUPN;U2SURP;SRRM1;LSM2;SFPQ;DDX39B;NOVA1;HNRNPA2B1;HNRNPD;HNRNPH3;SNRNP25;SRSF5;SF1	34	0.124088	4
GO:0035735	intraciliary transport involved in cilium assembly	9/40	0.00222053	3.63838	22.2306	DYNC2H1;DYNC2I1;TTC26;IFT74;KIF3B;KIF3A;IFT140;IFT122;KIFAP3	9	0.225	1
GO:0072583	clathrin-dependent endocytosis	7/26	0.00228876	4.61387	28.0512	DNAJC6;CLTC;CLTB;AP2S1;DLL1;AP2M1;SNAP91	7	0.269231	2
GO:0036388	pre-replicative complex assembly	12/64	0.00236018	2.89465	17.5098	ORC5;PSMD12;PSMB4;PSMB5;PSMA1;PSMD14;PSMC4;PSME3;PSMD3;PSME4;PSMD1;MCM6	12	0.1875	1
GO:0010565	regulation of cellular ketone metabolic process	12/64	0.00236018	2.89465	17.5098	NCOR2;PSMD12;PSMB4;PSMB5;PSMA1;PSMD14;PSMC4;PSME3;PSMD3;PSME4;PDK4;PSMD1	12	0.1875	4
GO:0035194	post-transcriptional gene silencing by RNA	6/20	0.00258572	5.36497	31.9632	TNRC6C;MOV10;CNOT6;AGO2;LIMD1;TNRC6B	6	0.3	4
GO:0045595	regulation of cell differentiation	22/156	0.00268006	2.06425	12.2243	DDX5;CREBBP;ZFHX2;CBFB;LTBP4;NREP;DLL1;ZFP36L1;CDK9;PPP2CA;MOSMO;PTBP1;SHH;BCL6;APC;MCRIP1;SMOC1;OCIAD1;FLOT2;EPHA3;ATF4;FGFR1	22	0.141026	5
GO:0010561	negative regulation of glycoprotein biosynthetic process	4/9	0.00280883	10.0059	58.7848	BACE2;ACOT8;AGO2;JAK3	4	0.444444	4
GO:1903599	positive regulation of autophagy of mitochondrion	4/9	0.00280883	10.0059	58.7848	PRKN;VDAC1;SLC25A5;SLC25A4	4	0.444444	4
GO:0045838	positive regulation of membrane potential	4/9	0.00280883	10.0059	58.7848	STOML2;BAD;AKT2;GLRX	4	0.444444	1
GO:0090596	sensory organ morphogenesis	4/9	0.00280883	10.0059	58.7848	SKI;NIPBL;INTU;GLI3	4	0.444444	5
GO:0035082	axoneme assembly	8/34	0.00286606	3.85449	22.5674	DNAI4;TTC26;RSPH1;SPEF1;TTLL3;SPAG1;CFAP46;CFAP206	8	0.235294	1
GO:0010823	negative regulation of mitochondrion organization	8/34	0.00286606	3.85449	22.5674	PRKN;PINK1;OPA1;BNIP3;GHITM;SLC25A5;TMEM14A;BCL2L1	8	0.235294	1
GO:0017156	calcium-ion regulated exocytosis	7/27	0.00289457	4.38294	25.6179	SYT4;PPP3CB;SYT3;SYT1;SYT11;ARHGAP17;SYT13	7	0.259259	2
GO:0006397	mRNA processing	36/300	0.00294825	1.71886	10.015	DDX5;CCNH;RNMT;HNRNPU;SNU13;PRPF19;PQBP1;PTBP1;PCF11;POLR2B;POLR2C;TRA2A;POLR2H;RBM6;SRRM2;SPEN;CPSF4;HSPA8;RBM14;SNRPN;FUS;RBM19;RPRD2;U2SURP;SRRM1;LSM2;SFPQ;SON;DDX39B;NOVA1;HNRNPA2B1;HNRNPD;HNRNPH3;SNRNP25;SRSF5;SF1	36	0.12	4
GO:0006261	DNA-dependent DNA replication	19/129	0.00310087	2.17011	12.5347	PRIM2;PSMD12;PSMD14;RFC2;PNKP;CDC7;ORC5;PSMB4;PSMB5;PSMA1;PSMC4;PSME3;PSMD3;PSME4;POLE3;REV3L;PSMD1;MCM6;POLE	19	0.147287	4
GO:0006826	iron ion transport	10/50	0.00326335	3.13365	17.9401	ATP6V1A;ATP6V0B;ATP6V1G1;ATP6AP1;CLTC;ATP6V1B2;ATP6V1E1;ATP6V0D1;ATP6V1D;ATP6V1C1	10	0.2	2
GO:0001764	neuron migration	10/50	0.00326335	3.13365	17.9401	TUBB2A;AUTS2;MAP1B;NAV1;ELP3;CELSR1;POMGNT2;MDGA1;PAFAH1B1;FGFR1	10	0.2	2
GO:0038095	Fc-epsilon receptor signaling pathway	17/111	0.00331395	2.27106	12.9669	MAP2K4;PSMD12;JUN;PSMD14;FBXW11;NFATC1;PPP3CB;PSMB4;NR4A3;PSMB5;PSMA1;PSMC4;PSME3;PSMD3;PSME4;PSMD1;LCP2	17	0.153153	3
GO:0010389	regulation of G2/M transition of mitotic cell cycle	21/149	0.00332992	2.06205	11.7636	OFD1;PSMD12;KCNH5;PSMD14;DCTN2;ODF2;TUBB;CDC7;TUBA4A;ACTR1A;PSMB4;PSMB5;PSMA1;PSMC4;PSME3;PSMD3;PSME4;CNTRL;PSMD1;DTL;PAFAH1B1	21	0.14094	6
GO:0000086	G2/M transition of mitotic cell cycle	19/130	0.00338531	2.15045	12.2324	OFD1;KHDRBS1;PLK3;DCTN2;CCNH;FBXW11;ODF2;TUBB;FBXL15;TUBA4A;LATS1;ACTR1A;WEE1;PPME1;CNTRL;PLCB1;CDK14;OPTN;PAFAH1B1	19	0.146154	6
GO:0000289	nuclear-transcribed mRNA poly(A) tail shortening	6/21	0.00339541	5.00704	28.4667	CNOT4;CNOT6;TUT7;PAN3;TUT4;TNKS1BP1	6	0.285714	4
GO:0016310	phosphorylation	45/400	0.00344603	1.59979	9.07166	RET;NIM1K;DGKE;DYRK3;DGKD;CERK;ROCK2;PNKP;LIMD1;STK4;HK1;PPP3CB;TBK1;PGK1;PDK4;PDK3;CSK;PRKACB;JAK3;CDKL2;ACVR1;TGFB2;DMPK;SPHK2;LIMK1;PASK;HIPK1;MERTK;CLK2;CDK9;LATS1;ILF3;PINK1;SNRK;LATS2;PRKAR1B;CCNE1;PEAK1;PKN2;CDK12;TRIB1;SGK1;CDK14;DGKI;FGFR1	45	0.1125	4
GO:1903305	regulation of regulated secretory pathway	8/35	0.00347759	3.71153	21.0125	SYT4;VPS18;SYT3;PREPL;RAB3A;SYT1;SYT11;SYT13	8	0.228571	2
GO:1900153	positive regulation of nuclear-transcribed mRNA catabolic process, deadenylation-dependent decay	5/15	0.00357263	6.25625	35.2506	TNRC6C;AGO2;TOB1;ZFP36L1;TNRC6B	5	0.333333	4
GO:1900151	regulation of nuclear-transcribed mRNA catabolic process, deadenylation-dependent decay	5/15	0.00357263	6.25625	35.2506	TNRC6C;AGO2;TOB1;ZFP36L1;TNRC6B	5	0.333333	4
GO:0007420	brain development	21/150	0.00360825	2.04596	11.5075	NDRG4;EGR2;EMX2;ZFHX2;FBXW11;AMIGO1;NIPBL;TMX2;SYNJ1;COL4A1;NFIB;B3GNT5;PPT1;PLXNB2;SOX6;MDGA1;PAFAH1B2;ADGRL2;RAB3GAP1;BPTF;PAFAH1B1	21	0.14	5
GO:0051261	protein depolymerization	7/28	0.00361587	4.174	23.468	KIF18A;WDR1;CFL1;STMN2;TWF2;MICAL3;KIF24	7	0.25	1
GO:0070842	aggresome assembly	3/5	0.00363791	18.7515	105.315	PRKN;TRIM37;HDAC6	3	0.6	1
GO:0060038	cardiac muscle cell proliferation	3/5	0.00363791	18.7515	105.315	TGFBR3;NDRG4;TGFB2	3	0.6	5
GO:0072383	plus-end-directed vesicle transport along microtubule	3/5	0.00363791	18.7515	105.315	KIF3B;KIF3A;KIFAP3	3	0.6	2
GO:1901524	regulation of mitophagy	3/5	0.00363791	18.7515	105.315	VDAC1;SLC25A5;SLC25A4	3	0.6	4
GO:0014855	striated muscle cell proliferation	3/5	0.00363791	18.7515	105.315	TGFBR3;NDRG4;TGFB2	3	0.6	5
GO:0044839	cell cycle G2/M phase transition	19/131	0.00369111	2.13113	11.9382	OFD1;KHDRBS1;PLK3;DCTN2;CCNH;FBXW11;ODF2;TUBB;FBXL15;TUBA4A;LATS1;ACTR1A;WEE1;PPME1;CNTRL;PLCB1;CDK14;OPTN;PAFAH1B1	19	0.145038	6
GO:0000082	G1/S transition of mitotic cell cycle	14/85	0.00376856	2.47418	13.8085	ACVR1;KHDRBS1;PLK3;USP37;CDKN2C;CCNH;CUL2;CDC7;INHBA;LATS1;LATS2;CCNE1;POLE;CDK14	14	0.164706	6
GO:0033238	regulation of cellular amine metabolic process	10/51	0.0037947	3.05705	17.0405	PSMD12;PSMB4;PSMB5;PSMA1;PSMD14;PSMC4;PSME3;PSMD3;PSME4;PSMD1	10	0.196078	4
GO:0008589	regulation of smoothened signaling pathway	10/51	0.0037947	3.05705	17.0405	MOSMO;SHH;CREBBP;INTU;DLG5;GAS1;IFT122;TXNDC15;GLI3;UCHL5	10	0.196078	3
GO:0045637	regulation of myeloid cell differentiation	12/68	0.00398067	2.68731	14.8509	KMT2E;CNOT4;TNRC6C;KMT2D;MOV10;CREBBP;NR4A3;CBFB;KMT2C;DPY30;EP300;TNRC6B	12	0.176471	5
GO:0033365	protein localization to organelle	20/142	0.00414047	2.05971	11.3015	TTC26;MTCH2;FAM149B1;ARL6;IFT140;ARL3;DDX1;IFT122;SNX10;SERP1;CROCC;LMNA;PACSIN2;BBS9;VPS35;MSX1;RAB6A;ATP6V1D;OPTN;BANP	20	0.140845	2
GO:0007169	transmembrane receptor protein tyrosine kinase signaling pathway	45/404	0.00414604	1.58162	8.67612	RET;ATP6V1A;ROCK2;SLA;NEDD9;IRS2;PTPRJ;SOGA1;IGF1R;PTBP1;SPRED1;FGF9;FLRT3;POLR2B;AKT2;POLR2C;CHN1;AP2S1;PDK4;POLR2H;ATP6V1E1;HRAS;ATP6V1D;AP2M1;ATP6V1C1;EPHA5;ATP6V1G1;ATP6V0B;ATP6AP1;VEGFC;SORBS1;MERTK;MAPK14;GFRA2;AHI1;NR4A3;APC;ATP6V1B2;LCP2;PLCB1;ATP6V0D1;MET;GPLD1;EPHA3;FGFR1	45	0.111386	3
GO:0098930	axonal transport	8/36	0.0041855	3.57878	19.5979	AP3M2;KIF3B;OPA1;KIF3A;FBXW11;BLOC1S2;NEFL;PAFAH1B1	8	0.222222	2
GO:0044257	cellular protein catabolic process	11/60	0.00422993	2.81443	15.3825	PRKN;MYLIP;BNIP3;RAB12;CLTC;AP2S1;VLDLR;CTSF;AP2M1;RSPRY1;LGMN	11	0.183333	4
GO:0048284	organelle fusion	6/22	0.00437952	4.69384	25.4914	VPS18;MIGA1;OPA1;MFN2;STX4;MIEF1	6	0.272727	1
GO:0035970	peptidyl-threonine dephosphorylation	6/22	0.00437952	4.69384	25.4914	DUSP4;PPP2CA;DUSP5;PPP5C;DUSP18;DUSP7	6	0.272727	4
GO:0017157	regulation of exocytosis	10/52	0.00439225	2.98411	16.1975	NSF;RAB3C;CADPS2;RAB3A;ATP6AP1;SYT1;LGI3;RAB12;STX4;CPLX1	10	0.192308	2
GO:0065002	intracellular protein transmembrane transport	9/44	0.00440644	3.22187	17.4776	DNAJC19;TOMM70;PEX7;GRPEL1;AKT2;GRPEL2;TIMM17A;TIMM23;TOMM20	9	0.204545	2
GO:0071453	cellular response to oxygen levels	4/10	0.00440788	8.33784	45.2275	ATP6V1A;ATP6V1G1;ATP6AP1;ATP6V0D1	4	0.4	3
GO:0046620	regulation of organ growth	4/10	0.00440788	8.33784	45.2275	LATS1;LATS2;WWC1;WWC2	4	0.4	5
GO:1903725	regulation of phospholipid metabolic process	4/10	0.00440788	8.33784	45.2275	DNAJC19;MTMR9;MTMR4;PHB2	4	0.4	4
GO:0060627	regulation of vesicle-mediated transport	15/96	0.00462943	2.32395	12.492	NSF;RAB3C;RAB5B;RAB3A;SYT1;LGI3;CPLX1;RIT2;SNX17;RAB12;DENND10;AP2S1;PACSIN2;GAS1;STX4	15	0.15625	2
GO:0016239	positive regulation of macroautophagy	10/53	0.00506146	2.91455	15.4066	PINK1;TBK1;BNIP3;SESN2;VDAC1;SLC25A5;SLC25A4;OPTN;PAFAH1B2;RAB3GAP1	10	0.188679	4
GO:0048523	negative regulation of cellular process	59/566	0.00508474	1.47068	7.76742	SPEF1;ARHGDIG;PTPRJ;CIB1;RND1;SHH;SESN2;ANXA6;WDR6;VPS35;CCN1;HRAS;PACRG;PBRM1;SPHK2;F2R;WNT9A;P3H3;CBFA2T3;SSTR3;TGFBR3;PSRC1;MYH9;ITGB1BP1;IRF6;EEF1E1;GPLD1;PRKN;BECN1;NDRG3;EI24;ADAM22;DLL1;TOB1;RTN4;PPP2CA;BRINP1;CCDC85B;LMNA;APBB1;MSX1;SH2B3;TGFB2;CDKN2C;BNIP3;INHBA;WARS1;SKI;FABP3;RGCC;BCL6;APC;SYT11;FABP7;DLG5;PPT1;BCL2;PLXNB2;CD200	59	0.10424	5
GO:0007417	central nervous system development	32/268	0.00523651	1.70706	8.96562	PRKN;NDRG4;AMIGO1;ADAM22;CELSR1;NPAS1;DLL1;NIPBL;SHH;SNTG2;ADAM23;SOX6;BPTF;EGR2;EMX2;ZFHX2;ATP6AP2;ELP3;AHI1;TMX2;SYNJ1;NFIB;COL4A1;B3GNT5;MTF1;PPT1;PLXNB2;SERPINI1;MDGA1;PAFAH1B2;ADGRL2;RAB3GAP1	32	0.119403	5
GO:0006521	regulation of cellular amino acid metabolic process	10/54	0.005808	2.84816	14.6638	PSMD12;PSMB4;PSMB5;PSMA1;PSMD14;PSMC4;PSME3;PSMD3;PSME4;PSMD1	10	0.185185	4
GO:0030042	actin filament depolymerization	4/11	0.0065231	7.14633	35.9632	WDR1;CFL1;MICAL3;TWF2	4	0.363636	1
GO:0036295	cellular response to increased oxygen levels	4/11	0.0065231	7.14633	35.9632	ATP6V1A;ATP6V1G1;ATP6AP1;ATP6V0D1	4	0.363636	3
GO:0048821	erythrocyte development	4/11	0.0065231	7.14633	35.9632	MED1;ALAS1;LYAR;SH2B3	4	0.363636	5
GO:1903204	negative regulation of oxidative stress-induced neuron death	4/11	0.0065231	7.14633	35.9632	PRKN;PINK1;NR4A3;ATF4	4	0.363636	3
GO:0090092	regulation of transmembrane receptor protein serine/threonine kinase signaling pathway	7/31	0.00660766	3.65166	18.3296	LATS1;TGFBR3;EID2;LATS2;SMURF2;LTBP4;NREP	7	0.225806	3
GO:0070841	inclusion body assembly	3/6	0.00687486	12.5003	62.2502	PRKN;TRIM37;HDAC6	3	0.5	1
GO:0007405	neuroblast proliferation	3/6	0.00687486	12.5003	62.2502	SHH;PLXNB2;PAFAH1B1	3	0.5	5
GO:0072386	plus-end-directed organelle transport along microtubule	3/6	0.00687486	12.5003	62.2502	KIF3B;KIF3A;KIFAP3	3	0.5	2
GO:0033131	regulation of glucokinase activity	3/6	0.00687486	12.5003	62.2502	PRKN;MIDN;BAD	3	0.5	4
GO:2000574	regulation of microtubule motor activity	3/6	0.00687486	12.5003	62.2502	CFAP100;FBXW11;PAFAH1B1	3	0.5	4
GO:0046839	phospholipid dephosphorylation	8/39	0.00698394	3.23193	16.0437	SYNJ1;MTMR11;SACM1L;MTMR9;MTMR4;MTMR6;SGPP1;MTMR7	8	0.205128	4
GO:0007009	plasma membrane organization	11/64	0.00700022	2.60146	12.9079	NSF;UGCG;RAB3A;SERP1;SYT11;EPB41L3;ANXA6;PACSIN2;MYH9;STX4;STX2	11	0.171875	1
GO:0006836	neurotransmitter transport	12/73	0.00714756	2.46637	12.1863	SNAP25;HSPA8;RAB3A;SYT1;SYNJ1;PDZD11;DNAJC5;SLC1A3;SLC17A6;SLC29A1;CPLX1;GLS	12	0.164384	2
GO:0060828	regulation of canonical Wnt signaling pathway	30/253	0.00738369	1.69253	8.30776	PRKN;PSMD12;PSMD14;KLHL12;PRICKLE1;LIMD1;STK4;GLI3;PSMB4;PSMB5;PSMD3;PSMD1;NPHP4;WLS;JUP;SMURF2;FZD7;TPBG;ATP6AP2;RNF146;LATS1;LATS2;PSMA1;APC;PSMC4;PSME3;PSME4;TMEM9;LGR6;CDK14	30	0.118577	3
GO:0045055	regulated exocytosis	23/180	0.00745519	1.84089	9.01822	SYT4;SNAP25;SYT3;TGFB2;RAB3A;SYT1;WDR1;PCDH7;OLA1;VEGFC;ARHGAP17;SYT13;SYNGR3;CPLX1;TUBA4A;PPP3CB;SYT11;DNAJC5;MYH9;FLNA;FAM3C;TIMP1;RAB11FIP5	23	0.127778	2
GO:0080090	regulation of primary metabolic process	18/130	0.00753017	2.01759	9.86366	MED1;PSMD12;CREBBP;SMARCD3;PSMD14;HMGCS1;ROCK2;IRS2;NCOR2;PSMB4;PSMB5;PSMA1;PSMC4;PSME3;PSMD3;PSME4;PSMD1;SC5D	18	0.138462	4
GO:0031329	regulation of cellular catabolic process	11/65	0.00787558	2.55314	12.3674	PRKN;RRAGA;RRAGC;CISD2;EP300;RAB39B;FBXL2;MTMR4;DRAM2;SOGA1;HDAC6	11	0.169231	4
GO:0070286	axonemal dynein complex assembly	7/32	0.00792706	3.5054	16.9573	DNAI4;DNAH1;ODAD3;CFAP100;DNAH5;SPAG1;ZMYND10	7	0.21875	1
GO:0006891	intra-Golgi vesicle-mediated transport	7/32	0.00792706	3.5054	16.9573	NSF;TRAPPC3;COPG1;RAB6A;NAPG;COPZ1;COPE	7	0.21875	2
GO:0042552	myelination	9/48	0.0079877	2.8908	13.9621	SKI;ARHGEF10;AMIGO1;SCN8A;EPB41L3;MAL2;SCN2A;SBF2;B4GALT5	9	0.1875	5
GO:0070646	protein modification by small protein removal	32/276	0.0080284	1.65036	7.96262	PRKN;USP36;BECN1;PSMD12;USP37;INO80D;PSMD14;TRRAP;COPS7A;ABRAXAS2;TOMM20;VCPIP1;UCHL1;PSMB4;PSMB5;PSMD3;PSMD1;EP300;MBD6;USP5;SMURF2;DESI2;RAD23A;STAM;UCHL5;COPS3;PSMA1;APC;PSMC4;PSME3;PSME4;ASXL2	32	0.115942	4
GO:0000422	autophagy of mitochondrion	8/40	0.0081748	3.13076	15.0486	PRKN;BECN1;GABARAPL1;PINK1;MAP1LC3A;BNIP3;CISD2;PHB2	8	0.2	4
GO:1901185	negative regulation of ERBB signaling pathway	8/40	0.0081748	3.13076	15.0486	PTPN18;RNF115;RNF126;PTPRJ;EPS15L1;STAM;EPS15;LGMN	8	0.2	3
GO:2001244	positive regulation of intrinsic apoptotic signaling pathway	8/40	0.0081748	3.13076	15.0486	BCAP31;BECN1;SFPQ;BAD;BCL2;MSX1;DNM1L;BCL2L1	8	0.2	3
GO:0042733	embryonic digit morphogenesis	5/18	0.008458	4.81172	22.9646	CREBBP;SHH;INTU;MSX1;GLI3	5	0.277778	5
GO:0000266	mitochondrial fission	5/18	0.008458	4.81172	22.9646	PRKN;OPA1;MIEF1;DNM1L;SLC25A46	5	0.277778	1
GO:0008053	mitochondrial fusion	5/18	0.008458	4.81172	22.9646	STOML2;MIGA1;OPA1;MFN2;MIEF1	5	0.277778	1
GO:0038093	Fc receptor signaling pathway	16/112	0.00846765	2.09128	9.97855	MAP2K4;PSMD12;JUN;PSMD14;FBXW11;NFATC1;PPP3CB;PSMB4;PSMB5;PSMA1;PSMC4;PSME3;PSMD3;PSME4;PSMD1;LCP2	16	0.142857	3
GO:1902750	negative regulation of cell cycle G2/M phase transition	10/57	0.00856995	2.66593	12.6885	PSMD12;PSMB4;PSMB5;PSMA1;PSMD14;PSMC4;PSME3;PSMD3;PSME4;PSMD1	10	0.175439	6
GO:0042273	ribosomal large subunit biogenesis	10/57	0.00856995	2.66593	12.6885	RPL3;MRPL1;LAS1L;NVL;NOP2;SNU13;RPL23A;ZNF622;SDAD1;WDR12	10	0.175439	1
GO:0031114	regulation of microtubule depolymerization	6/25	0.00858654	3.95207	18.8022	SPEF1;APC;MAP1B;STMN2;CIB1;TTBK2	6	0.24	1
GO:1903050	regulation of proteolysis involved in cellular protein catabolic process	6/25	0.00858654	3.95207	18.8022	LATS1;PINK1;PSMD14;PSME3;NUDT15;UCHL5	6	0.24	4
GO:0061013	regulation of mRNA catabolic process	17/122	0.00867489	2.03192	9.64619	NUP214;HSPA8;PSMD12;PSMD14;ZC3HAV1;ZFP36L1;MOV10;PSMB4;FXR2;PSMB5;PSMA1;PSMC4;PSME3;PSMD3;PSME4;HNRNPD;PSMD1	17	0.139344	4
GO:0065003	protein-containing complex assembly	31/267	0.0087978	1.65257	7.82204	KMT2D;RAB1A;SEC23A;STOML2;TRRAP;KLHL12;LAMC1;NAPG;CAND2;OPA1;PDZD11;SH3PXD2B;EP300;KIFAP3;DNM1L;AP2M1;BCL9L;NSF;TRAPPC3;CREBBP;TRAPPC1;BAD;DNAJB14;OCLN;AIM2;APC;CAPZA2;ITGB1BP1;NDUFAF1;CNIH3;SKAP2	31	0.116105	1
GO:0010972	negative regulation of G2/M transition of mitotic cell cycle	11/66	0.00883365	2.50659	11.8541	PSMD12;PSMB4;PSMB5;PSMA1;PSMD14;PSMC4;PSME3;PSMD3;PSME4;NABP2;PSMD1	11	0.166667	6
GO:0006122	mitochondrial electron transport, ubiquinol to cytochrome c	4/12	0.0092162	6.2527	29.3051	UQCRC1;UQCR11;CYC1;UQCRC2	4	0.333333	4
GO:0006206	pyrimidine nucleobase metabolic process	4/12	0.0092162	6.2527	29.3051	DPYSL4;DPYD;DPYSL3;CRMP1	4	0.333333	4
GO:0010467	gene expression	39/356	0.00942431	1.54948	7.22748	SMG1;RPL3;MRPS16;DDX25;MRPS11;MRPS33;HNRNPU;BAZ2A;MRPL37;MRPL10;NUP160;MRPL3;TAF1B;POLR2B;POLR2C;POLR2H;RBM6;NUP214;NDC1;CPSF4;HARS1;MRPS21;RPL23A;WARS1;SRRM1;MRPL44;PPP5C;SARS1;DDX39B;RRAGC;NOVA1;AGO2;HNRNPA2B1;HNRNPD;NUP98;HNRNPH3;SRSF5;RPL28;FARSB	39	0.109551	4
GO:0090199	regulation of release of cytochrome c from mitochondria	8/41	0.00951152	3.03572	14.1321	PRKN;PINK1;OPA1;BAD;BNIP3;GHITM;DNM1L;BCL2L1	8	0.195122	1
GO:0010977	negative regulation of neuron projection development	10/58	0.00968471	2.61024	12.1042	RTN4R;MYLIP;GDI1;DPYSL3;STMN2;OMG;CRMP1;CIB1;THY1;RTN4	10	0.172414	1
GO:0051085	chaperone cofactor-dependent protein refolding	6/26	0.0104759	3.75426	17.1145	ERO1A;HSPA8;DNAJB5;DNAJB14;HSPA13;DNAJC18	6	0.230769	1
GO:0035329	hippo signaling	6/26	0.0104759	3.75426	17.1145	LATS1;LATS2;WWC1;NPHP4;FAT4;STK4	6	0.230769	3
GO:1905476	negative regulation of protein localization to membrane	6/26	0.0104759	3.75426	17.1145	GDI1;CLTC;NUMB;ITGB1BP1;AP2M1;BCL2L1	6	0.230769	2
GO:0048285	organelle fission	6/26	0.0104759	3.75426	17.1145	PRKN;ACOT8;OPA1;PEX11B;MIEF1;DNM1L	6	0.230769	1
GO:0032204	regulation of telomere maintenance	6/26	0.0104759	3.75426	17.1145	RTEL1;SMG1;MRE11;YLPM1;HNRNPD;HDAC8	6	0.230769	4
GO:0090090	negative regulation of canonical Wnt signaling pathway	21/165	0.0106884	1.83134	8.3117	PRKN;PSMD12;PSMD14;TPBG;KLHL12;PRICKLE1;STK4;LIMD1;GLI3;LATS1;PSMB4;LATS2;PSMB5;PSMA1;APC;PSMC4;PSME3;PSMD3;PSME4;PSMD1;NPHP4	21	0.127273	3
GO:0006305	DNA alkylation	5/19	0.0107895	4.46779	20.2354	ATF7IP;KMT2E;DNMT3A;EHMT1;BAZ2A	5	0.263158	4
GO:0044728	DNA methylation or demethylation	5/19	0.0107895	4.46779	20.2354	ATF7IP;KMT2E;DNMT3A;EHMT1;BAZ2A	5	0.263158	4
GO:0009226	nucleotide-sugar biosynthetic process	5/19	0.0107895	4.46779	20.2354	GNPDA1;NAGK;SLC35D1;MPI;UAP1L1	5	0.263158	4
GO:0046931	pore complex assembly	5/19	0.0107895	4.46779	20.2354	NDC1;BAD;PDZD11;NUP98;RTN4	5	0.263158	1
GO:2000810	regulation of bicellular tight junction assembly	5/19	0.0107895	4.46779	20.2354	OCLN;CBFB;ROCK2;NPHP1;NPHP4	5	0.263158	1
GO:0007368	determination of left/right symmetry	8/42	0.0110042	2.94628	13.2862	OFD1;ODAD3;SHH;KIF3B;ARL6;DNAH5;RFX3;DLL1	8	0.190476	5
GO:0033604	negative regulation of catecholamine secretion	3/7	0.0113706	9.37475	41.9681	CHGA;SYT4;SYT11	3	0.428571	2
GO:0046929	negative regulation of neurotransmitter secretion	3/7	0.0113706	9.37475	41.9681	PRKN;PNKD;SYT11	3	0.428571	2
GO:0010918	positive regulation of mitochondrial membrane potential	3/7	0.0113706	9.37475	41.9681	STOML2;BAD;AKT2	3	0.428571	1
GO:0006665	sphingolipid metabolic process	16/116	0.0117253	2.00719	8.924	CERS6;CERK;ELOVL4;PPM1L;SPHK2;SGPP1;PPP2CA;NEU3;UGCG;SMPD2;SMPD4;NEU1;PPT1;SERINC1;SPTSSB;ESYT1	16	0.137931	4
GO:0043488	regulation of mRNA stability	19/146	0.0117455	1.87789	8.34588	NUP214;HSPA8;PSMD12;PSMD14;FUS;ROCK2;HNRNPU;TENT5C;ZFP36L1;PSMB4;FXR2;PSMB5;PSMA1;PSMC4;PSME3;PSMD3;PSME4;HNRNPD;PSMD1	19	0.130137	4
GO:0030308	negative regulation of cell growth	17/126	0.0118244	1.95693	8.68405	RTN4R;TGFB2;NDRG3;CDKN2C;SPHK2;EI24;PTPRJ;INHBA;RTN4;PPP2CA;PSRC1;BCL6;CCDC85B;SESN2;PPT1;APBB1;MSX1	17	0.134921	1
GO:0051094	positive regulation of developmental process	22/177	0.0118937	1.78254	7.89978	ACVR1;PRKN;SMURF2;BNIP3;RBM19;VLDLR;MIEF1;RTN4;SHH;PINK1;DLG5;CFL1;AGO2;LMNA;SPIRE1;VPS35;SOX6;DNM1L;PLCB1;RREB1;FGFR1;B4GALT5	22	0.124294	5
GO:2001234	negative regulation of apoptotic signaling pathway	12/78	0.0120234	2.2789	10.0748	ACVR1;PRKN;PINK1;OPA1;PSME3;PELI3;BCL2;GHITM;CFLAR;SLC25A5;TMEM14A;BCL2L1	12	0.153846	3
GO:0071277	cellular response to calcium ion	11/69	0.0122537	2.37655	10.4614	CPNE8;SYT4;SYT3;SYT1;SYT11;SYT13;RASGRP2;ECT2;RYR3;GPLD1;LGMN	11	0.15942	3
GO:1901990	regulation of mitotic cell cycle phase transition	23/188	0.0123106	1.75087	7.69908	OFD1;PSMD12;KCNH5;ANAPC7;PSMD14;DCTN2;ODF2;TUBB;CDC14A;TUBA4A;ZFP36L1;ACTR1A;PSMB4;RGCC;PSMB5;PSMA1;PSMC4;PSME3;PSMD3;PSME4;CNTRL;PSMD1;PAFAH1B1	23	0.12234	6
GO:0007052	mitotic spindle organization	20/157	0.012398	1.8327	8.04594	OFD1;CEP126;ARHGEF10;DCTN2;KIF23;ABRAXAS2;RANGAP1;NUP160;PTPA;DYNC1LI1;CLIP1;KIF18A;KIF3B;FLNA;NUP98;LSM14A;MAD1L1;ITGB3BP;DYNC1I1;PAFAH1B1	20	0.127389	1
GO:0035721	intraciliary retrograde transport	4/13	0.0125411	5.55766	24.3355	DYNC2H1;DYNC2I1;IFT140;IFT122	4	0.307692	1
GO:0097345	mitochondrial outer membrane permeabilization	4/13	0.0125411	5.55766	24.3355	BAD;BNIP3;BLOC1S2;VDAC2	4	0.307692	1
GO:0006490	oligosaccharide-lipid intermediate biosynthetic process	4/13	0.0125411	5.55766	24.3355	DPAGT1;ALG14;ALG13;MPDU1	4	0.307692	4
GO:0001778	plasma membrane repair	4/13	0.0125411	5.55766	24.3355	RAB3A;SYT11;ANXA6;MYH9	4	0.307692	1
GO:0060213	positive regulation of nuclear-transcribed mRNA poly(A) tail shortening	4/13	0.0125411	5.55766	24.3355	TNRC6C;AGO2;TOB1;TNRC6B	4	0.307692	4
GO:0031346	positive regulation of cell projection organization	16/117	0.0126763	1.98721	8.68018	RET;NDRG4;RETREG3;AMIGO1;STMN2;TWF2;RIT2;DPYSL3;NPTN;EP300;PLXNB2;SERPINI1;TOX;SCARF1;SCN1B;EPHA3	16	0.136752	1
GO:0035335	peptidyl-tyrosine dephosphorylation	7/35	0.0130466	3.12932	13.5788	DUSP4;DUSP5;PTPN18;PTPRJ;DUSP18;PTPRF;DUSP7	7	0.2	4
GO:0007224	smoothened signaling pathway	7/35	0.0130466	3.12932	13.5788	TTC26;DISP3;SHH;ARL13B;HIPK1;GLI3;TTBK2	7	0.2	3
GO:0006664	glycolipid metabolic process	9/52	0.0134428	2.62132	11.2961	SMPD2;NEU3;UGCG;SMPD4;CERK;B3GNT5;NEU1;ESYT1;PIGW	9	0.173077	4
GO:0006396	RNA processing	22/179	0.0134455	1.75964	7.5825	SNRPN;TUT7;FUS;TUT4;LSM1;HNRNPU;SRRM1;MRPL44;PPP2CA;PTBP1;SFPQ;SON;DDX39B;RRAGC;NOVA1;HNRNPA2B1;HNRNPD;SNRNP25;SRSF5;CDK12;HNRNPH3;RBM6	22	0.122905	4
GO:0051347	positive regulation of transferase activity	19/148	0.0134617	1.84858	7.96349	EPHA5;RET;MRE11;PARM1;NVL;RFC2;PNKP;DCUN1D2;MERTK;IGF1R;PINK1;HNRNPA2B1;HNRNPD;SERINC1;ZNF622;MET;EPHA3;CD200;FGFR1	19	0.128378	1
GO:0035330	regulation of hippo signaling	5/20	0.013524	4.16971	17.9435	WWC1;DLG5;WWC2;LIMD1;MAPK14	5	0.25	3
GO:2000142	regulation of DNA-templated transcription, initiation	10/61	0.0136969	2.4563	10.539	MED12;TNRC6C;MED1;MOV10;MED14;JUN;CBFB;MED31;CCNC;TNRC6B	10	0.163934	4
GO:0061014	positive regulation of mRNA catabolic process	8/44	0.0144978	2.78229	11.7796	TNRC6C;MOV10;ROCK2;AGO2;ZC3HAV1;TOB1;ZFP36L1;TNRC6B	8	0.181818	4
GO:0071805	potassium ion transmembrane transport	18/139	0.0146003	1.86661	7.88962	SLC24A2;KCNG2;KCNH4;KCNH5;SLC12A5;KCNK9;KCND2;KCNA1;KCNA2;SLC1A3;KCNJ16;ATP1A1;ATP1B1;SLC9A6;KCNS2;KCNS3;SLC12A7;KCNK3	18	0.129496	2
GO:1902036	regulation of hematopoietic stem cell differentiation	11/71	0.0150387	2.29708	9.64115	PSMD12;PSMB4;PSMB5;PSMA1;CBFB;PSMD14;PSMC4;PSME3;PSMD3;PSME4;PSMD1	11	0.15493	5
GO:2001239	regulation of extrinsic apoptotic signaling pathway in absence of ligand	6/28	0.0151036	3.4126	14.3084	RET;EYA1;BCL2;INHBA;BCL2L1;FGFR1	6	0.214286	3
GO:0016579	protein deubiquitination	30/267	0.0151197	1.59133	6.67048	PRKN;USP36;BECN1;PSMD12;USP37;INO80D;PSMD14;TRRAP;ABRAXAS2;TOMM20;VCPIP1;UCHL1;PSMB4;PSMB5;PSMD3;PSMD1;EP300;MBD6;USP5;SMURF2;DESI2;RAD23A;STAM;UCHL5;PSMA1;APC;PSMC4;PSME3;PSME4;ASXL2	30	0.11236	4
GO:0007399	nervous system development	46/447	0.0151817	1.44508	6.05152	NLGN3;PRKN;NRSN2;INTU;ADAM22;CRMP1;MSI1;VLDLR;CELSR1;NPAS1;SHH;SNTG2;DPYSL4;FLRT3;ADAM23;EP300;CHAC1;SOX6;ECT2;PCDHAC1;MYLIP;EMX2;EGR2;LIMK1;RITA1;ELP3;NAV1;PPP2R5D;INHBA;MERTK;GFRA2;NELL1;AHI1;APC;GLRB;MTF1;FABP7;B3GNT5;SCN8A;PPT1;UNC119;FAT4;SERPINI1;SCN2A;MET;NBL1	46	0.102908	5
GO:0061726	mitochondrion disassembly	7/36	0.0151855	3.02125	12.6512	PRKN;BECN1;GABARAPL1;PINK1;MAP1LC3A;BNIP3;CISD2	7	0.194444	1
GO:0007223	Wnt signaling pathway, calcium modulating pathway	7/36	0.0151855	3.02125	12.6512	TNRC6C;MOV10;PPP3CB;AGO2;NFATC1;PLCB1;TNRC6B	7	0.194444	3
GO:0017015	regulation of transforming growth factor beta receptor signaling pathway	14/100	0.0156402	2.04097	8.48619	CREBBP;SMURF2;LTBP4;NREP;MTMR4;LATS1;TGFBR3;SKI;EID2;SPRED1;LATS2;EP300;SKIL;BCL9L	14	0.14	3
GO:0090263	positive regulation of canonical Wnt signaling pathway	17/130	0.0158132	1.88725	7.82625	PSMD12;PSMD14;JUP;SMURF2;ATP6AP2;RNF146;PSMB4;PSMB5;PSMA1;PSMC4;PSME3;PSMD3;PSME4;PSMD1;TMEM9;LGR6;WLS	17	0.130769	3
GO:0034976	response to endoplasmic reticulum stress	15/110	0.0158483	1.97997	8.20637	ERO1A;PRKN;BCAP31;JUN;ATF6B;RASGRF1;TMTC3;SELENOK;ERLEC1;BCL2;FLOT1;DNAJB9;CHAC1;MARCHF6;ATF4	15	0.136364	3
GO:0006412	translation	25/214	0.0161224	1.66155	6.85814	AARS1;RPL3;MRPS16;MRPS11;MRPS33;MRPL37;APEH;YARS1;MRPL10;MRPL3;NARS1;IARS1;TSFM;HARS1;MRPS21;RPL23A;WARS1;SARS1;PPA1;AGO2;FARSA;EEF1E1;CARS1;RPL28;FARSB	25	0.116822	4
GO:0090336	positive regulation of brown fat cell differentiation	4/14	0.0165435	5.00162	20.5155	FNDC5;HNRNPU;VSTM2A;RREB1	4	0.285714	5
GO:0031054	pre-miRNA processing	4/14	0.0165435	5.00162	20.5155	TUT7;TUT4;AGO2;MRPL44	4	0.285714	4
GO:0090036	regulation of protein kinase C signaling	4/14	0.0165435	5.00162	20.5155	DGKD;SPHK2;ULK4;GPD1L	4	0.285714	3
GO:0099560	synaptic membrane adhesion	4/14	0.0165435	5.00162	20.5155	NTNG1;SLITRK3;GPC4;PTPRF	4	0.285714	1
GO:2000736	regulation of stem cell differentiation	13/91	0.0165996	2.08906	8.56173	PSMD12;CBFB;PSMD14;HNRNPU;PSMB4;PSMB5;PSMA1;PSMC4;PSME3;PSMD3;PSME4;OCIAD1;PSMD1	13	0.142857	5
GO:0007026	negative regulation of microtubule depolymerization	5/21	0.0166892	3.90889	15.9991	SPEF1;APC;STMN2;CIB1;TTBK2	5	0.238095	1
GO:1903077	negative regulation of protein localization to plasma membrane	5/21	0.0166892	3.90889	15.9991	CLTC;NUMB;CSK;AP2M1;BCL2L1	5	0.238095	2
GO:1904707	positive regulation of vascular associated smooth muscle cell proliferation	5/21	0.0166892	3.90889	15.9991	JUN;NR4A3;IGFBP5;FGF9;MFN2	5	0.238095	5
GO:0007035	vacuolar acidification	5/21	0.0166892	3.90889	15.9991	ATP6AP2;DMXL2;PPT1;TMEM9;ATP6V0D1	5	0.238095	2
GO:0034645	cellular macromolecule biosynthetic process	34/314	0.0171057	1.52715	6.21298	RPL3;MRPS16;MRE11;ALAS1;MRPS11;MRPS33;BAZ2A;MRPL37;MRPL10;ORC5;MRPL3;TAF1B;POLR2B;POLR2C;POLR2H;POLE;TSFM;HARS1;RFC2;MRPS21;CDC7;RPL23A;INHBA;WARS1;PPP5C;SARS1;RRAGC;AGO2;POLE3;RAD1;MCM6;RPL28;FARSB;B4GALT5	34	0.10828	4
GO:0060644	mammary gland epithelial cell differentiation	3/8	0.0171985	7.49939	30.4695	LATS1;AKT2;IRF6	3	0.375	5
GO:0002279	mast cell activation involved in immune response	3/8	0.0171985	7.49939	30.4695	CHGA;NR4A3;S100A13	3	0.375	3
GO:0043303	mast cell degranulation	3/8	0.0171985	7.49939	30.4695	CHGA;NR4A3;S100A13	3	0.375	2
GO:0000423	mitophagy	3/8	0.0171985	7.49939	30.4695	PRKN;BECN1;PHB2	3	0.375	4
GO:0033668	negative regulation by symbiont of host apoptotic process	3/8	0.0171985	7.49939	30.4695	SFPQ;RNF213;BCL2L1	3	0.375	3
GO:1904754	positive regulation of vascular associated smooth muscle cell migration	3/8	0.0171985	7.49939	30.4695	NR4A3;FGF9;IGFBP5	3	0.375	2
GO:0042996	regulation of Golgi to plasma membrane protein transport	3/8	0.0171985	7.49939	30.4695	CNST;CSK;ACSL3	3	0.375	2
GO:1905634	regulation of protein localization to chromatin	3/8	0.0171985	7.49939	30.4695	VCPIP1;SETD2;HDAC8	3	0.375	2
GO:0043619	regulation of transcription from RNA polymerase II promoter in response to oxidative stress	3/8	0.0171985	7.49939	30.4695	SESN2;ARNT;ATF4	3	0.375	4
GO:0045216	cell-cell junction organization	12/82	0.0174978	2.14821	8.69099	CDH6;TGFB2;OCLN;PARD6A;CADM1;JUP;CADM2;F2R;CSK;CDH8;CDH18;CDH7	12	0.146341	1
GO:0009064	glutamine family amino acid metabolic process	7/37	0.0175623	2.92038	11.8042	OAT;GOT1;DDAH2;GOT2;SLC39A8;RIMKLA;GLS	7	0.189189	4
GO:0035973	aggrephagy	6/29	0.0178787	3.26405	13.135	PRKN;DYNC1LI1;ARL13B;WDR81;HDAC6;DYNC1I1	6	0.206897	4
GO:0060173	limb development	6/29	0.0178787	3.26405	13.135	INTU;SMOC1;RSPO2;IFT122;GLI3;LNPK	6	0.206897	5
GO:0090313	regulation of protein targeting to membrane	6/29	0.0178787	3.26405	13.135	GDI1;AKT2;CIB1;ITGB1BP1;MIEF1;HRAS	6	0.206897	2
GO:0006283	transcription-coupled nucleotide-excision repair	11/73	0.0182743	2.22274	8.89598	COPS3;LIG1;CCNH;RFC2;POLR2B;POLR2C;EP300;COPS7A;ERCC5;POLR2H;PRPF19	11	0.150685	4
GO:0097193	intrinsic apoptotic signaling pathway	14/102	0.0183584	1.99437	7.97284	ERO1A;DDX5;BAD;BNIP3;CUL2;SELENOK;ARL6IP5;BCL2;ZNF385B;CHAC1;ZNF622;SCN2A;ATF4;BCL2L1	14	0.137255	3
GO:0030177	positive regulation of Wnt signaling pathway	19/153	0.0186218	1.77911	7.08697	PSMD12;PSMD14;JUP;SMURF2;ATP6AP2;RNF146;SKI;PSMB4;PSMB5;PSMA1;PSMC4;PSME3;PSMD3;PSME4;RSPO2;PSMD1;TMEM9;LGR6;WLS	19	0.124183	3
GO:0060260	regulation of transcription initiation from RNA polymerase II promoter	10/64	0.0188396	2.31946	9.21244	MED12;ATF7IP;TNRC6C;MED1;MOV10;MED14;CBFB;MED31;CCNC;TNRC6B	10	0.15625	4
GO:0038061	NIK/NF-kappaB signaling	11/74	0.0200735	2.18734	8.5489	PSMD12;PSMB4;PSMB5;PSMA1;PSMD14;FBXW11;PSMC4;PSME3;PSMD3;PSME4;PSMD1	11	0.148649	3
GO:0010720	positive regulation of cell development	7/38	0.0201892	2.82602	11.0288	SPEN;RASSF10;ATP6AP1;BAD;SERPINF1;NUMB;RFX3	7	0.184211	5
GO:0032446	protein modification by small protein conjugation	42/409	0.0202654	1.44036	5.61573	PRKN;MARCHF2;MOCS3;RNF14;CUL2;DCUN1D2;DTX4;NUP160;RNF157;CAND2;VCPIP1;RNF213;SUMO3;NAE1;MARCHF3;MARCHF6;FBXO9;TRIM23;NUP214;NDC1;VPS18;MYLIP;EGR2;ANAPC7;USP5;SMURF2;EYA1;FBXW11;MSL2;WWP2;FBXL15;RANGAP1;PJA2;CNOT4;PINK1;RRAGA;TRIM17;KLHL8;UBE2V2;NUP98;FBXL2;ASB5	42	0.102689	4
GO:0035337	fatty-acyl-CoA metabolic process	5/22	0.0203098	3.67876	14.3348	GCDH;PPT1;FITM2;ACSL3;FAR2	5	0.227273	4
GO:0019228	neuronal action potential	5/22	0.0203098	3.67876	14.3348	KCNA1;SCN8A;KCNA2;SCN2A;SCN1A	5	0.227273	3
GO:0098661	inorganic anion transmembrane transport	10/65	0.020833	2.27717	8.81541	GABRB2;GABRA1;SLC25A3;SLC12A5;GLRB;SLC1A3;SLC37A4;SLC12A7;SLC25A11;GABRG2	10	0.153846	2
GO:0051568	histone H3-K4 methylation	6/30	0.0209837	3.12788	12.0861	KMT2D;KMT2C;TET3;CXXC1;TET2;DPY30	6	0.2	4
GO:0018023	peptidyl-lysine trimethylation	6/30	0.0209837	3.12788	12.0861	KMT2D;SETD5;SETD2;TET3;TET2;VCPKMT	6	0.2	4
GO:0014020	primary neural tube formation	6/30	0.0209837	3.12788	12.0861	SKI;TGFB2;IFT122;PLXNB2;PRICKLE1;CELSR1	6	0.2	5
GO:0051963	regulation of synapse assembly	8/47	0.0211543	2.56785	9.90142	NLGN3;SETD5;CLSTN3;DLG5;SLITRK3;VPS35;GPC4;MDGA1	8	0.170213	1
GO:0048268	clathrin coat assembly	4/15	0.0212601	4.54668	17.5089	CLTC;CLTB;AP2S1;EPS15	4	0.266667	1
GO:0031579	membrane raft organization	4/15	0.0212601	4.54668	17.5089	YJEFN3;FLOT1;PPT1;FLOT2	4	0.266667	1
GO:0043517	positive regulation of DNA damage response, signal transduction by p53 class mediator	4/15	0.0212601	4.54668	17.5089	DDX5;SPRED1;MSX1;EEF1E1	4	0.266667	3
GO:2000369	regulation of clathrin-dependent endocytosis	4/15	0.0212601	4.54668	17.5089	NEU3;DGKD;UNC119;SNAP91	4	0.266667	1
GO:0060211	regulation of nuclear-transcribed mRNA poly(A) tail shortening	4/15	0.0212601	4.54668	17.5089	TNRC6C;AGO2;TOB1;TNRC6B	4	0.266667	4
GO:0070498	interleukin-1-mediated signaling pathway	13/94	0.0212737	2.01136	7.74429	PSMD12;PSMD14;FBXW11;PELI3;PSMB4;PSMB5;PSMA1;PSMC4;PSME3;PSMD3;PSME4;PSMD1;PLCB1	13	0.138298	3
GO:1901532	regulation of hematopoietic progenitor cell differentiation	11/75	0.022	2.15305	8.21756	PSMD12;PSMB4;PSMB5;PSMA1;CBFB;PSMD14;PSMC4;PSME3;PSMD3;PSME4;PSMD1	11	0.146667	5
GO:0006366	transcription by RNA polymerase II	34/320	0.022007	1.49462	5.70407	SETD2;DDX5;NFIX;CBFB;CCNH;RNMT;ZBTB1;GLIS3;AFF4;SCAF8;LSM11;PCF11;POLR2B;TAF1C;POLR2C;NRBF2;POLR2H;RREB1;NELFE;MED1;CPSF4;CREBBP;TAF13;ESRRG;RPRD2;NCOR2;CDK9;DRAP1;NR4A3;TFCP2;NABP2;CDK12;INTS6;ATF4	34	0.10625	4
GO:1990858	cellular response to lectin	15/115	0.0229338	1.88046	7.09901	PSMD12;CREBBP;PSMD14;FBXW11;PSMB4;PSMB5;PSMA1;PSMC4;PSME3;PSMD3;PSME4;EP300;PSMD1;PRKACB;HRAS	15	0.130435	3
GO:0002223	stimulatory C-type lectin receptor signaling pathway	15/115	0.0229338	1.88046	7.09901	PSMD12;CREBBP;PSMD14;FBXW11;PSMB4;PSMB5;PSMA1;PSMC4;PSME3;PSMD3;PSME4;EP300;PSMD1;PRKACB;HRAS	15	0.130435	3
GO:0032412	regulation of ion transmembrane transporter activity	7/39	0.0230779	2.73756	10.3175	TRPC6;SPHK2;WWP2;GPD1L;PHB2;SCN1B;SCN2B	7	0.179487	2
GO:0006289	nucleotide-excision repair	14/105	0.0230882	1.92831	7.2667	LIG1;CCNH;RFC2;PNKP;COPS7A;RAD23A;PRPF19;COPS3;POLR2B;POLR2C;EP300;ERCC5;POLR2H;POLE	14	0.133333	4
GO:0010821	regulation of mitochondrion organization	8/48	0.0237876	2.50352	9.35964	PRKN;USP36;PINK1;EP300;VPS35;VDAC1;DNM1L;HDAC6	8	0.166667	1
GO:0045926	negative regulation of growth	16/126	0.0241892	1.82373	6.78765	TGFB2;NDRG3;CDKN2C;SPHK2;EI24;PTPRJ;INHBA;RTN4;PPP2CA;PSRC1;BCL6;CCDC85B;SESN2;PPT1;APBB1;MSX1	16	0.126984	3
GO:0030388	fructose 1,6-bisphosphate metabolic process	3/9	0.0243934	6.24916	23.2059	TIGAR;PFKM;PFKP	3	0.333333	4
GO:0007042	lysosomal lumen acidification	3/9	0.0243934	6.24916	23.2059	ATP6AP2;PPT1;TMEM9	3	0.333333	1
GO:0035090	maintenance of apical/basal cell polarity	3/9	0.0243934	6.24916	23.2059	WDR1;PDZD11;ANK1	3	0.333333	1
GO:0045199	maintenance of epithelial cell apical/basal polarity	3/9	0.0243934	6.24916	23.2059	WDR1;PDZD11;ANK1	3	0.333333	1
GO:0002448	mast cell mediated immunity	3/9	0.0243934	6.24916	23.2059	CHGA;NR4A3;S100A13	3	0.333333	3
GO:0043653	mitochondrial fragmentation involved in apoptotic process	3/9	0.0243934	6.24916	23.2059	BNIP3;VPS35;DNM1L	3	0.333333	1
GO:0009313	oligosaccharide catabolic process	3/9	0.0243934	6.24916	23.2059	NEU3;NEU1;MAN2C1	3	0.333333	4
GO:0016559	peroxisome fission	3/9	0.0243934	6.24916	23.2059	ACOT8;PEX11B;DNM1L	3	0.333333	1
GO:0070816	phosphorylation of RNA polymerase II C-terminal domain	3/9	0.0243934	6.24916	23.2059	CDK9;CCNH;CDK12	3	0.333333	4
GO:1902110	positive regulation of mitochondrial membrane permeability involved in apoptotic process	3/9	0.0243934	6.24916	23.2059	BLOC1S2;BNIP3;VDAC2	3	0.333333	1
GO:0051788	response to misfolded protein	3/9	0.0243934	6.24916	23.2059	DNAJB14;HDAC6;DNAJC18	3	0.333333	3
GO:0060285	cilium-dependent cell motility	5/23	0.0244072	3.47419	12.8993	DNAH1;DNAH2;RFX3;CFAP54;CFAP44	5	0.217391	2
GO:0006306	DNA methylation	5/23	0.0244072	3.47419	12.8993	ATF7IP;KMT2E;DNMT3A;EHMT1;BAZ2A	5	0.217391	4
GO:0051084	'de novo' posttranslational protein folding	6/31	0.0244339	3.0026	11.145	ERO1A;HSPA8;DNAJB5;DNAJB14;HSPA13;DNAJC18	6	0.193548	1
GO:0072384	organelle transport along microtubule	6/31	0.0244339	3.0026	11.145	RAB1A;FBXW11;COPG1;RAB6A;DYNC1I1;PAFAH1B1	6	0.193548	2
GO:0017158	regulation of calcium ion-dependent exocytosis	6/31	0.0244339	3.0026	11.145	SYT4;SYT3;SYT1;SYT11;SYT13;RAB3GAP1	6	0.193548	2
GO:0060606	tube closure	6/31	0.0244339	3.0026	11.145	SKI;TGFB2;IFT122;PLXNB2;PRICKLE1;CELSR1	6	0.193548	5
GO:0071375	cellular response to peptide hormone stimulus	14/106	0.0248509	1.90725	7.04701	GOT1;INSIG2;IRS2;SORBS1;TSHR;ZFP36L1;ADCY5;NR4A3;PKM;PRKAR1B;AKT2;RAB12;PRKACB;GPLD1	14	0.132075	3
GO:0018205	peptidyl-lysine modification	14/106	0.0248509	1.90725	7.04701	NUP214;NDC1;LIPT1;EGR2;EYA1;VPS33B;P3H3;RANGAP1;NUP160;HDAC6;SUMO3;EP300;VCPKMT;NUP98	14	0.132075	4
GO:0098656	anion transmembrane transport	10/67	0.0252734	2.19703	8.08068	SLC25A29;ARL6IP5;LRRC8C;SLC1A3;SLC39A8;SLC25A12;SLC25A5;SLC25A11;SLC25A4;SLC7A2	10	0.149254	2
GO:0034470	ncRNA processing	23/201	0.0252837	1.62185	5.96449	AARS1;WDR36;RPL3;TUT7;DDX27;NVL;TUT4;ADAT1;WDR75;IMP4;SNU13;RPL23A;WDR12;MRPL44;FBL;SARS1;LAS1L;AGO2;HNRNPA2B1;PIH1D2;INTS6;RPL28;LYAR	23	0.114428	4
GO:0032981	mitochondrial respiratory chain complex I assembly	9/58	0.026206	2.29959	8.37458	NDUFB9;NDUFA12;NDUFB5;NDUFAF7;TMEM126A;NDUFC2;TMEM126B;NDUFAF1;ECSIT	9	0.155172	1
GO:0010257	NADH dehydrogenase complex assembly	9/58	0.026206	2.29959	8.37458	NDUFB9;NDUFA12;NDUFB5;NDUFAF7;TMEM126A;NDUFC2;TMEM126B;NDUFAF1;ECSIT	9	0.155172	1
GO:1901992	positive regulation of mitotic cell cycle phase transition	9/58	0.026206	2.29959	8.37458	KMT2E;LSM11;RGCC;ANAPC7;UBE2E2;CDC7;PLCB1;PHB2;DTL	9	0.155172	6
GO:0016079	synaptic vesicle exocytosis	7/40	0.0262391	2.65446	9.66357	SNAP25;RAB3A;SYT1;DNAJC5;STX4;STX2;CPLX1	7	0.175	2
GO:0034332	adherens junction organization	8/49	0.0266425	2.44233	8.85405	CDH6;CADM1;JUP;CADM2;CSK;CDH8;CDH18;CDH7	8	0.163265	1
GO:0000281	mitotic cytokinesis	8/49	0.0266425	2.44233	8.85405	SON;APC;ROCK2;ARL3;SEPTIN6;UNC119;KIF23;ECT2	8	0.163265	6
GO:0060341	regulation of cellular localization	8/49	0.0266425	2.44233	8.85405	EPHA5;PRKN;PINK1;PARD6A;REEP5;WWC1;MAD1L1;ADCY5	8	0.163265	2
GO:0090201	negative regulation of release of cytochrome c from mitochondria	4/16	0.0267194	4.16757	15.0965	PRKN;OPA1;GHITM;BCL2L1	4	0.25	1
GO:0035020	regulation of Rac protein signal transduction	4/16	0.0267194	4.16757	15.0965	KBTBD6;AUTS2;RASGRF1;ARHGAP17	4	0.25	3
GO:0008090	retrograde axonal transport	4/16	0.0267194	4.16757	15.0965	FBXW11;NEFL;ACTR10;PAFAH1B1	4	0.25	2
GO:0080135	regulation of cellular response to stress	15/118	0.0281962	1.82539	6.51405	NUP214;NDC1;PRKN;HSPA8;CREBBP;DYRK3;SMG1;ARMT1;ROCK2;NUP160;PINK1;EP300;NUP98;CAMK2G;ATF4	15	0.127119	3
GO:0035195	gene silencing by miRNA	6/32	0.0282432	2.88696	10.2975	TNRC6C;MOV10;CNOT6;AGO2;LIMD1;TNRC6B	6	0.1875	4
GO:0032206	positive regulation of telomere maintenance	6/32	0.0282432	2.88696	10.2975	RTEL1;MRE11;PNKP;HNRNPA2B1;HNRNPD;NABP2	6	0.1875	4
GO:0042590	antigen processing and presentation of exogenous peptide antigen via MHC class I	11/78	0.0285901	2.05631	7.30955	MFSD6;PSMD12;PSMB4;PSMB5;PSMA1;PSMD14;PSMC4;PSME3;PSMD3;PSME4;PSMD1	11	0.141026	3
GO:0008380	RNA splicing	13/98	0.0289493	1.91629	6.78789	SNRPN;FUS;LSM1;SRRM1;PPP2CA;PTBP1;SFPQ;DDX39B;RRAGC;NOVA1;SNRNP25;CDK12;HNRNPH3	13	0.132653	4
GO:0010507	negative regulation of autophagy	9/59	0.0289598	2.25348	7.98147	USP36;SMG1;RRAGA;DAP;PINK1;BCL2;WDR6;MTMR9;MET	9	0.152542	4
GO:1903530	regulation of secretion by cell	9/59	0.0289598	2.25348	7.98147	NSF;RAB3C;DNAJC1;RAB3A;SYT1;LGI3;RAB12;STX4;CPLX1	9	0.152542	2
GO:0048675	axon extension	5/24	0.0290001	3.29116	11.6522	NLGN3;PPP3CB;AUTS2;SLC9A6;MAP1B	5	0.208333	1
GO:1901880	negative regulation of protein depolymerization	5/24	0.0290001	3.29116	11.6522	SPEF1;APC;STMN2;CIB1;TTBK2	5	0.208333	1
GO:0050805	negative regulation of synaptic transmission	5/24	0.0290001	3.29116	11.6522	ATAD1;SLC24A2;TMEM25;PNKD;SYT11	5	0.208333	3
GO:0090314	positive regulation of protein targeting to membrane	5/24	0.0290001	3.29116	11.6522	AKT2;CIB1;ITGB1BP1;MIEF1;HRAS	5	0.208333	2
GO:0051881	regulation of mitochondrial membrane potential	7/41	0.0296831	2.57625	9.06112	STOML2;PINK1;BAD;AKT2;ARL6IP5;BCL2;BCL2L1	7	0.170732	1
GO:0002220	innate immune response activating cell surface receptor signaling pathway	15/119	0.0301343	1.80774	6.33089	PSMD12;CREBBP;PSMD14;FBXW11;PSMB4;PSMB5;PSMA1;PSMC4;PSME3;PSMD3;PSME4;EP300;PSMD1;PRKACB;HRAS	15	0.12605	3
GO:0036294	cellular response to decreased oxygen levels	10/69	0.0303546	2.12232	7.41711	TIGAR;PINK1;RGCC;KCND2;BAD;BNIP3;LMNA;PGK1;SCN2A;ZFP36L1	10	0.144928	3
GO:0031330	negative regulation of cellular catabolic process	10/69	0.0303546	2.12232	7.41711	NELL1;RRAGA;DAP;BCL2;WDR6;MTMR9;TIMP1;MET;TIMP4;GPLD1	10	0.144928	4
GO:0010498	proteasomal protein catabolic process	23/205	0.0308797	1.58585	5.51506	PRKN;PSMD12;PSMD14;SMURF2;FBXW11;WWP2;RAD23A;PRPF19;KLHL42;ERLEC1;RNF126;UCHL1;PSMB4;PSMB5;KBTBD6;PSMA1;APPBP2;PSMC4;PSME3;PSMD3;PSME4;PSMD1;MARCHF6	23	0.112195	4
GO:0001558	regulation of cell growth	24/217	0.0323586	1.56062	5.3543	TGFB2;CDKN2C;NDRG3;SPHK2;EI24;FAM107A;LTBP4;PTPRJ;AKAP6;CIB1;TMEM97;INHBA;RASGRP2;RTN4;PPP2CA;PSRC1;BCL6;CCDC85B;SESN2;PPT1;BCL2;APBB1;MSX1;SGK1	24	0.110599	1
GO:0008637	apoptotic mitochondrial changes	6/33	0.0324238	2.77988	9.53184	BAD;BNIP3;BCL2;VPS35;DNM1L;BCL2L1	6	0.181818	1
GO:1990138	neuron projection extension	6/33	0.0324238	2.77988	9.53184	NLGN3;PPP3CB;AUTS2;SLC9A6;FLRT3;MAP1B	6	0.181818	1
GO:0006488	dolichol-linked oligosaccharide biosynthetic process	4/17	0.0329408	3.84678	13.1292	DPAGT1;ALG14;ALG13;MPDU1	4	0.235294	4
GO:1903861	positive regulation of dendrite extension	4/17	0.0329408	3.84678	13.1292	RNF157;SYT4;SYT3;SYT1	4	0.235294	1
GO:1904355	positive regulation of telomere capping	4/17	0.0329408	3.84678	13.1292	RTEL1;PNKP;HNRNPD;NABP2	4	0.235294	4
GO:0048499	synaptic vesicle membrane organization	4/17	0.0329408	3.84678	13.1292	SNAP25;STX4;SYP;STX2	4	0.235294	1
GO:0006002	fructose 6-phosphate metabolic process	3/10	0.0329586	5.35613	18.2778	PFKM;PFKP;HK1	3	0.3	4
GO:0015813	L-glutamate transmembrane transport	3/10	0.0329586	5.35613	18.2778	ARL6IP5;SLC1A3;SLC25A12	3	0.3	2
GO:0046834	lipid phosphorylation	3/10	0.0329586	5.35613	18.2778	DGKE;DGKD;DGKI	3	0.3	4
GO:0046466	membrane lipid catabolic process	3/10	0.0329586	5.35613	18.2778	SMPD2;PPT1;SMPDL3B	3	0.3	4
GO:0031102	neuron projection regeneration	3/10	0.0329586	5.35613	18.2778	GAP43;OMG;NREP	3	0.3	1
GO:0051292	nuclear pore complex assembly	3/10	0.0329586	5.35613	18.2778	NDC1;NUP98;RTN4	3	0.3	1
GO:0030422	production of siRNA involved in RNA interference	3/10	0.0329586	5.35613	18.2778	HENMT1;AGO2;MRPL44	3	0.3	4
GO:0033363	secretory granule organization	3/10	0.0329586	5.35613	18.2778	BLOC1S2;F2R;VPS33B	3	0.3	1
GO:0050770	regulation of axonogenesis	8/51	0.0330478	2.32848	7.93966	RTN4R;GDI1;AMIGO1;CHN1;OMG;PLXNB2;THY1;RTN4	8	0.156863	1
GO:0019646	aerobic electron transport chain	10/70	0.0331483	2.08684	7.10937	NDUFB9;NDUFA12;NDUFB5;UQCRC1;NDUFC2;UQCR11;UQCRC2;CYC1;NDUFAF1;COX6B1	10	0.142857	4
GO:0071248	cellular response to metal ion	16/131	0.0332928	1.74396	5.93369	PRKN;CPNE8;SYT4;JUN;SYT3;TIGAR;SYT1;KCNA1;BNIP3;SYT13;RASGRP2;RYR3;SYT11;ECT2;GPLD1;LGMN	16	0.122137	3
GO:0097659	nucleic acid-templated transcription	7/42	0.0334188	2.50251	8.5051	PPP5C;TAF1B;RRAGC;POLR2B;POLR2C;BAZ2A;POLR2H	7	0.166667	4
GO:0006511	ubiquitin-dependent protein catabolic process	36/354	0.0337601	1.42276	4.82098	PRKN;PSMD12;PSMD14;RNF14;RNF115;UCHL1;PSMB4;RNF213;PSMB5;PSMD3;PSMD1;RBBP6;MARCHF6;FBXW4;MYLIP;NDFIP1;ANAPC7;SMURF2;FBXW11;WWP2;RAD23A;KLHL42;RNF146;CNOT4;COPS3;RNF126;PINK1;KBTBD6;WDR81;PSMA1;APPBP2;PSMC4;PSME3;PSME4;KLHL8;DTL	36	0.101695	4
GO:0098662	inorganic cation transmembrane transport	29/274	0.033846	1.48638	5.0328	ATP6V1A;SLC24A2;KCNG2;KCNK9;KCNA1;KCNA2;SLC1A3;ATP1A1;RYR3;ATP5F1B;SLC39A8;SCN1B;SCN1A;KCNH4;KCNH5;TRPC6;KCND2;SLC30A4;KCNJ16;ATP1B1;SLC9A6;KCNS2;KCNS3;SCN8A;ATP5PO;ATP6V0D1;SCN2A;KCNK3;SCN2B	29	0.105839	2
GO:0010677	negative regulation of cellular carbohydrate metabolic process	5/25	0.0341035	3.12644	10.5622	TIGAR;EP300;SOGA1;CBFA2T3;CLK2	5	0.2	4
GO:0045604	regulation of epidermal cell differentiation	5/25	0.0341035	3.12644	10.5622	CBFB;ROCK2;DLL1;SGPP1;ZFP36L1	5	0.2	5
GO:0030100	regulation of endocytosis	9/61	0.0350623	2.16657	7.25937	RAB5B;RIT2;SNX17;SYT11;FLOT1;AP2S1;PACSIN2;DLL1;EPHA3	9	0.147541	1
GO:0030111	regulation of Wnt signaling pathway	14/111	0.0351898	1.80844	6.05286	PRKN;WWOX;CBFB;NXN;FZD7;ATP6AP2;NFATC1;SHISA2;PPP2CA;SKI;RSPO2;LGR6;CDK14;WLS	14	0.126126	3
GO:0043161	proteasome-mediated ubiquitin-dependent protein catabolic process	33/321	0.0357364	1.43944	4.79561	PRKN;PSMD12;PSMD14;CUL2;AMN1;UCHL1;PSMB4;PSMB5;PSMD3;PSMD1;DNAJB9;MARCHF6;FBXO9;FBXW4;ANAPC7;SMURF2;SGTB;FBXW11;FBXO17;WWP2;DNAJB14;RAD23A;FBXL15;KLHL42;DNAJC18;RNF126;KBTBD6;PSMA1;APPBP2;PSMC4;PSME3;PSME4;FBXL2	33	0.102804	4
GO:1905477	positive regulation of protein localization to membrane	13/101	0.0359042	1.85066	6.15696	PRKN;BAD;CIB1;MIEF1;SORBS1;EFCAB7;CNPY4;AKT2;BCL2;ITGB1BP1;STX4;HRAS;EPHA3	13	0.128713	2
GO:0042775	mitochondrial ATP synthesis coupled electron transport	10/71	0.036117	2.05252	6.81639	NDUFB9;NDUFA12;NDUFB5;UQCRC1;NDUFC2;UQCR11;UQCRC2;CYC1;NDUFAF1;COX6B1	10	0.140845	4
GO:0090304	nucleic acid metabolic process	10/71	0.036117	2.05252	6.81639	PTBP1;ATXN2;POLR2B;DDX1;POLR2C;HNRNPA2B1;LSM1;HNRNPD;HNRNPU;POLR2H	10	0.140845	4
GO:2000045	regulation of G1/S transition of mitotic cell cycle	10/71	0.036117	2.05252	6.81639	KMT2E;WEE1;LSM11;CDKN2C;RGCC;APC;PSME3;FAM107A;UBE2E2;PLCB1	10	0.140845	6
GO:0065004	protein-DNA complex assembly	17/143	0.0361922	1.69134	5.6134	PSMD12;PSMD14;CCNH;NAP1L3;NAP1L2;SPTY2D1;ORC5;PSMB4;PSMB5;PSMA1;PSMC4;PSME3;PSMD3;PSME4;PSMD1;ERCC5;MCM6	17	0.118881	1
GO:0032956	regulation of actin cytoskeleton organization	12/91	0.0363705	1.90255	6.30505	EPHA5;ROCK2;FAM107A;TWF2;ARHGAP18;ARHGAP17;NEB;ESAM;CELSR1;IQGAP2;EPHA3;RND1	12	0.131868	1
GO:0030099	myeloid cell differentiation	8/52	0.0366123	2.27544	7.52571	KMT2E;DYRK3;SNRK;TET2;ACIN1;INHBA;SLC25A5;JAK3	8	0.153846	5
GO:0048639	positive regulation of developmental growth	8/52	0.0366123	2.27544	7.52571	RNF157;SYT4;SYT3;SYT1;LIMK1;TWF2;PLCB1;DLL1	8	0.153846	5
GO:0007044	cell-substrate junction assembly	6/34	0.0369861	2.68046	8.83803	PEAK1;LAMA3;LAMC1;THY1;SORBS1;PLEC	6	0.176471	1
GO:0001843	neural tube closure	6/34	0.0369861	2.68046	8.83803	SKI;TGFB2;IFT122;PLXNB2;PRICKLE1;CELSR1	6	0.176471	5
GO:0031648	protein destabilization	6/34	0.0369861	2.68046	8.83803	PRKN;CREBBP;GGA3;FBXW11;EP300;RAD23A	6	0.176471	1
GO:0010906	regulation of glucose metabolic process	6/34	0.0369861	2.68046	8.83803	PRKN;AKT2;PDK4;PDK3;IRS2;GPLD1	6	0.176471	4
GO:0045661	regulation of myoblast differentiation	6/34	0.0369861	2.68046	8.83803	BOC;FLOT2;MAPK14;PLCB1;DLL1;ZFP36L1	6	0.176471	5
GO:0099643	signal release from synapse	7/43	0.0374547	2.43286	7.99103	SNAP25;HSPA8;RAB3A;SYT1;PDZD11;DNAJC5;CPLX1	7	0.162791	2
GO:0021762	substantia nigra development	7/43	0.0374547	2.43286	7.99103	FGF9;ATP5PB;RAD1;SYNGR3;CALM2;INA;COX6B1	7	0.162791	5
GO:0000470	maturation of LSU-rRNA	5/26	0.0397292	2.9774	9.6041	MRPL1;LAS1L;NOP2;SNU13;WDR12	5	0.192308	4
GO:0086010	membrane depolarization during action potential	5/26	0.0397292	2.9774	9.6041	SCN8A;SCN2A;SCN1B;SCN1A;SCN2B	5	0.192308	1
GO:1900087	positive regulation of G1/S transition of mitotic cell cycle	5/26	0.0397292	2.9774	9.6041	KMT2E;LSM11;RGCC;UBE2E2;PLCB1	5	0.192308	6
GO:0031112	positive regulation of microtubule polymerization or depolymerization	5/26	0.0397292	2.9774	9.6041	CLIP1;OCLN;PSRC1;STMN2;MET	5	0.192308	1
GO:0050434	positive regulation of viral transcription	5/26	0.0397292	2.9774	9.6041	CDK9;POLR2B;POLR2C;POLR2H;NELFE	5	0.192308	4
GO:0071539	protein localization to centrosome	4/18	0.0399359	3.57181	11.503	NUDCD3;C2CD3;DCTN2;SNX10	4	0.222222	2
GO:0090335	regulation of brown fat cell differentiation	4/18	0.0399359	3.57181	11.503	FNDC5;HNRNPU;VSTM2A;RREB1	4	0.222222	5
GO:1903859	regulation of dendrite extension	4/18	0.0399359	3.57181	11.503	RNF157;SYT4;SYT3;SYT1	4	0.222222	1
GO:1905606	regulation of presynapse assembly	4/18	0.0399359	3.57181	11.503	SLITRK3;VPS35;GPC4;MDGA1	4	0.222222	1
GO:0099174	regulation of presynapse organization	4/18	0.0399359	3.57181	11.503	SLITRK3;VPS35;GPC4;MDGA1	4	0.222222	1
GO:0006356	regulation of transcription by RNA polymerase I	4/18	0.0399359	3.57181	11.503	WDR75;FLNA;LYAR;ATF4	4	0.222222	4
GO:0001836	release of cytochrome c from mitochondria	4/18	0.0399359	3.57181	11.503	BAD;BCL2;DNM1L;BCL2L1	4	0.222222	1
GO:0048678	response to axon injury	4/18	0.0399359	3.57181	11.503	GAP43;FLRT3;DPYSL3;NREP	4	0.222222	1
GO:0036498	IRE1-mediated unfolded protein response	8/53	0.0404266	2.22475	7.1376	KLHDC3;EXTL2;SERP1;LMNA;PPP2R5B;CXXC1;DNAJB9;ATP6V0D1	8	0.150943	3
GO:0006886	intracellular protein transport	34/336	0.0405546	1.4142	4.53265	NAPB;RAB1A;RAB5B;ARL6;UNC93B1;CSE1L;CLTC;AKAP6;PRICKLE1;PHB2;NAPG;HDAC6;GGA3;AKT2;ARFIP2;VPS35;TMED1;STX4;STX2;RAB6A;TNPO3;TRIM23;WLS;NUP214;NSF;EGR2;RABGAP1L;VPS33B;TBC1D9;STAM;RANBP6;COPZ1;SNX17;ARF5	34	0.10119	2
GO:0090307	mitotic spindle assembly	7/44	0.0417979	2.36698	7.51494	OFD1;ARHGEF10;KIF3B;FLNA;ABRAXAS2;KIF23;LSM14A	7	0.159091	1
GO:0042059	negative regulation of epidermal growth factor receptor signaling pathway	7/44	0.0417979	2.36698	7.51494	RNF115;RNF126;ZGPAT;PTPRJ;EPS15L1;STAM;EPS15	7	0.159091	3
GO:0007269	neurotransmitter secretion	7/44	0.0417979	2.36698	7.51494	SNAP25;HSPA8;RAB3A;SYT1;PDZD11;DNAJC5;CPLX1	7	0.159091	2
GO:1902808	positive regulation of cell cycle G1/S phase transition	6/35	0.0419391	2.58789	8.20758	KMT2E;LSM11;RGCC;UBE2E2;PLCB1;PHB2	6	0.171429	6
GO:0008593	regulation of Notch signaling pathway	11/83	0.0425332	1.91299	6.04021	EGFL7;CREBBP;TGFB2;YJEFN3;RITA1;EP300;ITGB1BP1;WWP2;CHAC1;TM2D3;DLL1	11	0.13253	3
GO:0002479	antigen processing and presentation of exogenous peptide antigen via MHC class I, TAP-dependent	10/73	0.0425972	1.98714	6.27135	PSMD12;PSMB4;PSMB5;PSMA1;PSMD14;PSMC4;PSME3;PSMD3;PSME4;PSMD1	10	0.136986	3
GO:0032970	regulation of actin filament-based process	10/73	0.0425972	1.98714	6.27135	EPHA5;ROCK2;FAM107A;TWF2;ARHGAP18;ARHGAP17;CELSR1;IQGAP2;EPHA3;RND1	10	0.136986	1
GO:0019896	axonal transport of mitochondrion	3/11	0.0428719	4.68636	14.7599	OPA1;NEFL;ACTR10	3	0.272727	2
GO:0033173	calcineurin-NFAT signaling cascade	3/11	0.0428719	4.68636	14.7599	NFAT5;PPP3CB;NFATC1	3	0.272727	3
GO:0034982	mitochondrial protein processing	3/11	0.0428719	4.68636	14.7599	MIPEP;STOML2;PMPCB	3	0.272727	4
GO:0007205	protein kinase C-activating G protein-coupled receptor signaling pathway	3/11	0.0428719	4.68636	14.7599	GAP43;DGKD;F2R	3	0.272727	3
GO:0051932	synaptic transmission, GABAergic	3/11	0.0428719	4.68636	14.7599	GABRA1;GABRB2;GABRG2	3	0.272727	3
GO:0006048	UDP-N-acetylglucosamine biosynthetic process	3/11	0.0428719	4.68636	14.7599	GNPDA1;NAGK;UAP1L1	3	0.272727	4
GO:0034622	cellular protein-containing complex assembly	19/168	0.0434223	1.5987	5.01479	DNAI4;NDC1;ARL6;CLTC;CLTB;DNAJB14;DNAJC28;RTN4;EID2;POGZ;PSMG3;AP2S1;SPAG1;VAMP1;PSMG1;NUP98;NDUFAF1;EPS15;AP2M1	19	0.113095	4
GO:0050821	protein stabilization	20/179	0.0434614	1.57722	4.94599	PRKN;ATF7IP;USP36;CAMLG;CCNH;MTMR9;ATP1B1;STK4;PHB2;RTN4;NAPG;CCT6A;PINK1;WDR81;FLOT1;EP300;FLOT2;FLNA;MSX1;CCT5	20	0.111732	1
GO:0061136	regulation of proteasomal protein catabolic process	8/54	0.0444961	2.17627	6.77332	PRKN;PINK1;PSMD14;PSME3;TMTC3;RAD23A;NUDT15;UCHL5	8	0.148148	4
GO:0030097	hemopoiesis	12/94	0.0450396	1.83265	5.6816	TGFBR3;TGFB2;SNRK;YJEFN3;TET2;PRRC2C;INHBA;TOX;HIPK1;DLL1;SH2B3;ATF4	12	0.12766	5
GO:0043549	regulation of kinase activity	12/94	0.0450396	1.83265	5.6816	RET;EPHA5;MRE11;HNRNPU;IRS2;ZNF622;ECT2;MERTK;MET;EPHA3;IGF1R;FGFR1	12	0.12766	4
GO:0018209	peptidyl-serine modification	19/169	0.0456637	1.58796	4.90116	DYRK3;SMG1;DMPK;ROCK2;CDC7;STK4;HIPK1;MAPK14;TTBK2;LATS1;PINK1;TBK1;LATS2;AKT2;NTMT1;PDK3;PKN2;SGK1;POGLUT3	19	0.112426	4
GO:0008033	tRNA processing	9/64	0.045783	2.04806	6.3159	QTRT1;TRUB1;CPSF4;SARS1;AARS1;DDX1;ADAT1;LCMT2;TRDMT1	9	0.140625	4
GO:0031145	anaphase-promoting complex-dependent catabolic process	11/84	0.0458003	1.88668	5.81752	PSMD12;PSMB4;PSMB5;ANAPC7;PSMA1;PSMD14;PSMC4;PSME3;PSMD3;PSME4;PSMD1	11	0.130952	4
GO:0032465	regulation of cytokinesis	11/84	0.0458003	1.88668	5.81752	BECN1;PLK3;SETD2;CSPP1;KIF23;PKN2;FSD1;ECT2;CALM2;CDC14A;BCL2L1	11	0.130952	6
GO:0034620	cellular response to unfolded protein	5/27	0.0458854	2.84191	8.75765	PRKN;HSPA8;PACRG;HSPA13;OPTN	5	0.185185	3
GO:0090398	cellular senescence	5/27	0.0458854	2.84191	8.75765	OPA1;SMC5;SMC6;MAPK14;HRAS	5	0.185185	3
GO:1902475	L-alpha-amino acid transmembrane transport	5/27	0.0458854	2.84191	8.75765	SLC25A29;ARL6IP5;SLC1A3;SLC25A12;SLC7A2	5	0.185185	2
GO:1901888	regulation of cell junction assembly	5/27	0.0458854	2.84191	8.75765	SETD5;OCLN;CBFB;ROCK2;FLOT1	5	0.185185	1
GO:0001508	action potential	7/45	0.0464546	2.30456	7.07335	KCND2;KCNA1;SCN8A;KCNA2;AKAP6;SCN2A;SCN1A	7	0.155556	1
GO:0051962	positive regulation of nervous system development	7/45	0.0464546	2.30456	7.07335	NLGN3;SPEN;RASSF10;CLSTN3;SERPINF1;DLG5;NUMB	7	0.155556	5
GO:0001706	endoderm formation	6/36	0.0472898	2.50149	7.63319	DUSP4;DUSP5;SETD2;COL11A1;LAMA3;INHBA	6	0.166667	5
GO:0071709	membrane assembly	6/36	0.0472898	2.50149	7.63319	NLGN3;UGCG;FLOT1;FLOT2;STX4;STX2	6	0.166667	1
GO:0061025	membrane fusion	6/36	0.0472898	2.50149	7.63319	NSF;OPA1;GCA;VPS33B;DNM1L;NAPG	6	0.166667	1
GO:0045995	regulation of embryonic development	6/36	0.0472898	2.50149	7.63319	NIPBL;CFL1;RBM19;EHMT1;PLCB1;B4GALT5	6	0.166667	5
GO:0050684	regulation of mRNA processing	6/36	0.0472898	2.50149	7.63319	KHDRBS1;CPSF4;PTCD2;SON;ZFP36L1;SF1	6	0.166667	4
GO:0086003	cardiac muscle cell contraction	4/19	0.0477083	3.33351	10.1427	ATP1A1;SCN1B;SCN1A;SCN2B	4	0.210526	5
GO:0007616	long-term memory	4/19	0.0477083	3.33351	10.1427	NPAS4;RASGRF1;SGK1;PJA2	4	0.210526	5
GO:0072595	maintenance of protein localization in organelle	4/19	0.0477083	3.33351	10.1427	PINK1;ARL2BP;HNRNPU;HK1	4	0.210526	2
GO:1902992	negative regulation of amyloid precursor protein catabolic process	4/19	0.0477083	3.33351	10.1427	RTN1;GGA3;FLOT2;RTN4	4	0.210526	4
GO:0007268	chemical synaptic transmission	31/306	0.0480514	1.41518	4.29576	NLGN3;GABRB2;NAPB;SNAP25;RAB3A;KCNA1;SLC1A3;CPLX1;CDH8;GRM7;PDZD11;SLC17A6;SNCG;PRKACB;SLC12A7;GABRA1;HSPA8;SLC12A5;KCND2;SYT1;HTR1F;GABRG2;RIT2;PRKAR1B;GLRB;NOVA1;DNAJC5;UNC119;KCNK3;SCN2B;PAFAH1B1	31	0.101307	3
GO:0016925	protein sumoylation	8/55	0.0488257	2.12985	6.43108	NDC1;NUP214;EGR2;EYA1;SUMO3;NUP98;RANGAP1;NUP160	8	0.145455	4
GO:0060966	regulation of gene silencing by RNA	8/55	0.0488257	2.12985	6.43108	NDC1;NUP214;POLR2B;POLR2C;AGO2;NUP98;POLR2H;NUP160	8	0.145455	4
GO:0060147	regulation of posttranscriptional gene silencing	8/55	0.0488257	2.12985	6.43108	NDC1;NUP214;POLR2B;POLR2C;AGO2;NUP98;POLR2H;NUP160	8	0.145455	4
GO:0045732	positive regulation of protein catabolic process	11/85	0.0492346	1.86109	5.60402	NSF;PRKN;PLK3;SMURF2;APC;TIPARP;VPS35;WWP2;ASB5;DTL;GPLD1	11	0.129412	4
GO:0051865	protein autoubiquitination	9/65	0.0497928	2.01138	6.03391	RNF157;PRKN;CNOT4;RNF146;RNF115;RNF213;TRIM17;WWP2;TRIM37	9	0.138462	4
GO:0051252	regulation of RNA metabolic process	9/65	0.0497928	2.01138	6.03391	USP36;PTBP1;MED1;SON;FUS;NOVA1;HNRNPH3;PQBP1;CLK2	9	0.138462	4

## Sheet: pathway.FMT
ID	Term	Gene.ratio	P.value	Odds.Ratio	Combined.Score	Genes	Overlap	Term.genes
R-HSA-418990	Adherens Junctions Interactions	4/29	0.0013779	9.37839	61.7773	CADM3;CTNNA1;CDH24;NECTIN1	4	29
R-HSA-392517	Rap1 Signaling	3/16	0.00229433	13.4945	82.0104	RAP1A;PRKG1;RAPGEF4	3	16
R-HSA-373080	Class B/2 (Secretin Family Receptors)	6/92	0.00477137	4.10119	21.9214	FZD1;FZD4;GNG7;PTH2R;WNT9A;WNT2	6	92
R-HSA-909733	Interferon Alpha/Beta Signaling	5/72	0.00752363	4.37796	21.4069	IRF7;IFI35;USP18;IRF9;PSMB8	5	72
R-HSA-354192	Integrin Signaling	3/27	0.0104454	7.30543	33.3244	RAP1A;PTK2;RAPGEF4	3	27
R-HSA-933541	TRAF6 Mediated IRF7 Activation	3/28	0.0115544	7.01286	31.2822	TRAF6;IRF7;IKBKE	3	28
R-HSA-499943	Interconversion Of Nucleotide Di- And Triphosphates	3/28	0.0115544	7.01286	31.2822	DCTD;RRM2;AK5	3	28
R-HSA-8875878	MET Promotes Cell Motility	3/28	0.0115544	7.01286	31.2822	RAP1A;LAMC2;PTK2	3	28
R-HSA-9639288	Amino Acids Regulate mTORC1	4/55	0.0140352	4.59116	19.5868	SEH1L;RRAGD;TCIRG1;LAMTOR5	4	55
R-HSA-446728	Cell Junction Organization	5/86	0.0154814	3.61869	15.0831	CADM3;CTNNA1;CDH24;LAMC2;NECTIN1	5	86
R-HSA-1500931	Cell-Cell Communication	6/120	0.0165439	3.08946	12.6721	CADM3;CTNNA1;CDH24;LAMC2;PTK2;NECTIN1	6	120
R-HSA-421270	Cell-cell Junction Organization	4/61	0.0198548	4.10662	16.0951	CADM3;CTNNA1;CDH24;NECTIN1	4	61
R-HSA-4608870	Asymmetric Localization Of PCP Proteins	4/62	0.020949	4.03562	15.6003	FZD1;FZD4;PSMB8;PSMB9	4	62
R-HSA-913531	Interferon Signaling	8/200	0.0210728	2.45078	9.45945	GBP5;SEH1L;EIF4E3;IRF7;IFI35;USP18;PSMB8;IRF9	8	200
R-HSA-76009	Platelet Aggregation (Plug Formation)	3/36	0.0228093	5.31061	20.0772	RAP1A;PTK2;RAPGEF4	3	36
R-HSA-5663213	RHO GTPases Activate WASPs And WAVEs	3/36	0.0228093	5.31061	20.0772	ARPC1B;WIPF3;PTK2	3	36
R-HSA-76002	Platelet Activation, Signaling And Aggregation	9/254	0.0297595	2.16134	7.59624	CHID1;LGALS3BP;ISLR;RAP1A;TRPC6;GNG7;CD9;PTK2;RAPGEF4	9	254
R-HSA-1280215	Cytokine Signaling In Immune System	19/702	0.0310926	1.64981	5.72613	GBP5;SEH1L;ANXA1;EIF4E3;ANXA2;IL16;IFI35;USP18;PSMB8;IL17RA;RELB;PSMB9;CCND1;TRAF6;GRB10;IRF7;IL12A;STAT6;IRF9	19	702
R-HSA-3000171	Non-integrin membrane-ECM Interactions	3/41	0.032023	4.61067	15.8667	DDR1;DAG1;LAMC2	3	41
R-HSA-381676	Glucagon-like Peptide-1 (GLP1) Regulates Insulin Secretion	3/42	0.0340659	4.49222	15.1813	RAP1A;GNG7;RAPGEF4	3	42
R-HSA-3858494	Beta-catenin Independent WNT Signaling	6/142	0.0342012	2.58678	8.73165	FZD1;FZD4;GNG7;PRKG1;PSMB8;PSMB9	6	142
R-HSA-9009391	Extra-nuclear Estrogen Signaling	4/73	0.0354296	3.39035	11.3245	CCND1;SPHK1;GNG7;PTK2	4	73
R-HSA-445355	Smooth Muscle Contraction	3/43	0.0361749	4.37969	14.5379	ANXA1;ANXA2;DYSF	3	43
R-HSA-9711097	Cellular Response To Starvation	6/153	0.0463816	2.39186	7.34505	SEH1L;RRAGD;RPL38;TCIRG1;GCN1;LAMTOR5	6	153
R-HSA-500792	GPCR Ligand Binding	13/458	0.0494795	1.72198	5.17662	FZD1;OXTR;ANXA1;FZD4;PLPPR3;PTH2R;WNT9A;NLN;GNG7;TAC3;ACKR2;ACKR1;WNT2	13	458
R-HSA-8951664	Neddylation	8/237	0.0495693	2.0509	6.16168	KBTBD6;KLHL11;LMO7;DCAF5;FBXO10;COMMD7;PSMB8;PSMB9	8	237

## Sheet: pathway.CSDS
ID	Term	Gene.ratio	P.value	Odds.Ratio	Combined.Score	Genes	Overlap	Term.genes
R-HSA-373755	Semaphorin Interactions	7/64	9.34051e-05	7.36429	68.33	SEMA5A;SEMA7A;DPYSL5;DPYSL3;ITGA1;PLXNC1;MYL9	7	64
R-HSA-416700	Other Semaphorin Interactions	4/19	0.000242815	15.8796	132.169	SEMA5A;SEMA7A;ITGA1;PLXNC1	4	19
R-HSA-500792	GPCR Ligand Binding	19/458	0.000274973	2.64174	21.6592	PLPPR1;HTR1F;PTGER3;NPY2R;WNT7A;HTR2C;OPRK1;ADRB1;ADRA1D;CRHR1;TRHR;GRM2;SHH;NPY;GNG7;GNB4;ACKR3;DRD1;NTSR1	19	458
R-HSA-427601	Multifunctional Anion Exchangers	3/9	0.000359819	29.6979	235.502	SLC26A7;SLC26A11;SLC26A4	3	9
R-HSA-375280	Amine Ligand-Binding Receptors	5/40	0.000513348	8.5241	64.5663	HTR1F;HTR2C;ADRA1D;ADRB1;DRD1	5	40
R-HSA-1630316	Glycosaminoglycan Metabolism	8/120	0.000924951	4.2844	29.9298	NDST4;DSEL;DSE;GPC4;ST3GAL1;HS3ST1;ST3GAL3;CHST3	8	120
R-HSA-372790	Signaling By GPCR	23/689	0.00135572	2.10983	13.9321	PLPPR1;ARHGEF25;HTR1F;PTGER3;NPY2R;WNT7A;HTR2C;OPRK1;GPR83;ADRB1;ADRA1D;CRHR1;TRHR;RGS4;GRM2;SHH;NPY;GNG7;GNB4;ACKR3;RGS12;DRD1;NTSR1	23	689
R-HSA-74259	Purine Catabolism	3/17	0.00263787	12.7225	75.5434	NT5E;NT5C1A;NUDT18	3	17
R-HSA-1296065	Inwardly Rectifying K+ Channels	4/35	0.00265867	7.67742	45.5265	KCNJ11;GNG7;GNB4;KCNJ2	4	35
R-HSA-422475	Axon Guidance	18/519	0.00295154	2.179	12.6936	EPHA5;SEMA5A;ROBO3;MPP3;SEMA7A;EPHA10;ITGA1;CACNA1C;AP2A2;CACNA1G;DPYSL5;DPYSL3;COL4A5;COL6A3;PLXNC1;MYL9;SCN3A;EPHA3	18	519
R-HSA-9037629	Lewis Blood Group Biosynthesis	3/18	0.0031266	11.8737	68.4853	B3GALT2;FUT2;ST3GAL3	3	18
R-HSA-419037	NCAM1 Interactions	4/37	0.00326708	7.21139	41.277	COL4A5;COL6A3;CACNA1C;CACNA1G	4	37
R-HSA-373076	Class A/1 (Rhodopsin-like Receptors)	13/327	0.00355985	2.49594	14.0722	PLPPR1;HTR1F;PTGER3;NPY2R;HTR2C;OPRK1;ADRB1;ADRA1D;TRHR;NPY;ACKR3;DRD1;NTSR1	13	327
R-HSA-388396	GPCR Downstream Signaling	20/619	0.00395106	2.02748	11.2196	ARHGEF25;HTR1F;PTGER3;NPY2R;HTR2C;OPRK1;GPR83;ADRB1;ADRA1D;CRHR1;TRHR;RGS4;GRM2;NPY;GNG7;GNB4;ACKR3;RGS12;DRD1;NTSR1	20	619
R-HSA-9675108	Nervous System Development	18/545	0.00489455	2.06868	11.0046	EPHA5;SEMA5A;ROBO3;MPP3;SEMA7A;EPHA10;ITGA1;CACNA1C;AP2A2;CACNA1G;DPYSL5;DPYSL3;COL4A5;COL6A3;PLXNC1;MYL9;SCN3A;EPHA3	18	545
R-HSA-9033658	Blood Group Systems Biosynthesis	3/22	0.00561691	9.37208	48.5659	B3GALT2;FUT2;ST3GAL3	3	22
R-HSA-445355	Smooth Muscle Contraction	4/43	0.00564567	6.10008	31.5793	ACTA2;ITGA1;MYL9;CACNA1G	4	43
R-HSA-397014	Muscle Contraction	9/196	0.00582287	2.88459	14.844	ACTA2;KCNJ11;TNNT1;ITGA1;CACNA1C;MYL9;SCN3A;KCNJ2;CACNA1G	9	196
R-HSA-8948216	Collagen Chain Trimerization	4/44	0.00613	5.94727	30.2987	COL15A1;COL11A1;COL4A5;COL6A3	4	44
R-HSA-71387	Metabolism Of Carbohydrates	11/285	0.00872492	2.41025	11.4284	NUP107;NDST4;B3GALT2;DSEL;DSE;GPC4;FUT2;ST3GAL1;HS3ST1;ST3GAL3;CHST3	11	285
R-HSA-3928665	EPH-ephrin Mediated Repulsion Of Cells	4/49	0.0089663	5.28512	24.9155	EPHA5;EPHA10;AP2A2;EPHA3	4	49
R-HSA-5173105	O-linked Glycosylation	6/107	0.0091564	3.54353	16.6308	SEMA5A;SPON1;THSD7B;B3GNT5;ST3GAL1;ST3GAL3	6	107
R-HSA-422356	Regulation Of Insulin Secretion	5/77	0.00934681	4.13585	19.3257	KCNJ11;GNG7;GNB4;CACNA1C;CACNA1E	5	77
R-HSA-1793185	Chondroitin Sulfate/Dermatan Sulfate Metabolism	4/50	0.00962052	5.16996	24.0086	DSEL;DSE;GPC4;CHST3	4	50
R-HSA-3781865	Diseases Of Glycosylation	7/143	0.0103107	3.07407	14.0625	SEMA5A;NOTCH2;SPON1;THSD7B;GPC4;ST3GAL3;CHST3	7	143
R-HSA-400042	Adrenaline,noradrenaline Inhibits Insulin Secretion	3/28	0.0111007	7.1206	32.048	GNG7;GNB4;CACNA1C	3	28
R-HSA-1296041	Activation Of G Protein Gated Potassium Channels	3/29	0.012231	6.84639	30.15	GNG7;GNB4;KCNJ2	3	29
R-HSA-451326	Activation Of Kainate Receptors Upon Glutamate Binding	3/29	0.012231	6.84639	30.15	MPP3;GNG7;GNB4	3	29
R-HSA-4090294	SUMOylation Of Intracellular Receptors	3/29	0.012231	6.84639	30.15	UBE2I;PPARG;ESR1	3	29
R-HSA-2022928	HS-GAG Biosynthesis	3/30	0.013425	6.59248	28.4178	NDST4;GPC4;HS3ST1	3	30
R-HSA-9683701	Translation Of Structural Proteins	3/30	0.013425	6.59248	28.4178	UBE2I;ST3GAL1;ST3GAL3	3	30
R-HSA-425366	Transport Of Bile Salts And Organic Acids, Metal Ions And Amine Compounds	5/86	0.0146058	3.67462	15.5302	SLC16A1;SLC30A3;SLC6A15;SLC40A1;SLC16A3	5	86
R-HSA-2022090	Assembly Of Collagen Fibrils And Other Multimeric Structures	4/57	0.0150738	4.48553	18.8159	COL15A1;COL11A1;COL4A5;COL6A3	4	57
R-HSA-375165	NCAM Signaling For Neurite Out-Growth	4/57	0.0150738	4.48553	18.8159	COL4A5;COL6A3;CACNA1C;CACNA1G	4	57
R-HSA-418594	G Alpha (I) Signaling Events	11/312	0.0162458	2.19099	9.02672	RGS4;GRM2;HTR1F;NPY;GNG7;PTGER3;NPY2R;GNB4;OPRK1;ACKR3;RGS12	11	312
R-HSA-977443	GABA Receptor Activation	4/59	0.0169259	4.32198	17.629	GABRQ;GNG7;GNB4;KCNJ2	4	59
R-HSA-2682334	EPH-Ephrin Signaling	5/91	0.0182453	3.4601	13.8537	EPHA5;EPHA10;AP2A2;MYL9;EPHA3	5	91
R-HSA-373080	Class B/2 (Secretin Family Receptors)	5/92	0.0190386	3.42015	13.5482	SHH;GNG7;GNB4;WNT7A;CRHR1	5	92
R-HSA-8956319	Nucleotide Catabolism	3/35	0.0203625	5.56099	21.6548	NT5E;NT5C1A;NUDT18	3	35
R-HSA-936440	Negative Regulators Of DDX58/IFIH1 Signaling	3/35	0.0203625	5.56099	21.6548	IFIH1;UBA7;ISG15	3	35
R-HSA-8864260	Transcriptional Regulation By AP-2 (TFAP2) Family Of Transcription Factors	3/36	0.0219452	5.3922	20.5939	UBE2I;ESR1;KCTD15	3	36
R-HSA-9660821	ADORA2B Mediated Anti-Inflammatory Cytokine Production	6/131	0.0228075	2.85966	10.8114	GNG7;GNB4;ADRB1;GPR83;DRD1;CRHR1	6	131
R-HSA-425407	SLC-mediated Transmembrane Transport	9/247	0.0234485	2.26053	8.48365	SLC16A1;SLC9A5;SLC30A3;SLC6A15;SLC40A1;SLC26A7;SLC26A11;SLC26A4;SLC16A3	9	247
R-HSA-5083635	Defective B3GALTL Causes PpS	3/37	0.0235933	5.23334	19.6082	SEMA5A;SPON1;THSD7B	3	37
R-HSA-5173214	O-glycosylation Of TSR Domain-Containing Proteins	3/38	0.0253067	5.08356	18.6906	SEMA5A;SPON1;THSD7B	3	38
R-HSA-1650814	Collagen Biosynthesis And Modifying Enzymes	4/67	0.0257208	3.77162	13.8058	COL15A1;COL11A1;COL4A5;COL6A3	4	67
R-HSA-416476	G Alpha (Q) Signaling Events	8/212	0.0264487	2.34115	8.50435	RGS4;ARHGEF25;GNG7;GNB4;HTR2C;ADRA1D;NTSR1;TRHR	8	212
R-HSA-1296071	Potassium Channels	5/102	0.0282351	3.06599	10.937	KCNC1;KCNJ11;GNG7;GNB4;KCNJ2	5	102
R-HSA-3906995	Diseases Associated With O-glycosylation Of Proteins	4/69	0.0282766	3.6552	13.0334	SEMA5A;NOTCH2;SPON1;THSD7B	4	69
R-HSA-3560782	Diseases Associated With Glycosaminoglycan Metabolism	3/40	0.0289289	4.80828	17.0353	GPC4;ST3GAL3;CHST3	3	40
R-HSA-112316	Neuronal System	12/386	0.0295643	1.92234	6.76893	GABRQ;MPP3;KCNC1;KCNJ11;GNG7;EPB41L3;GNB4;SYT9;AP2A2;CACNA1E;KCNJ2;NRGN	12	386
R-HSA-425393	Transport Of Inorganic Cations/Anions And Amino Acids/Oligopeptides	5/104	0.0303596	3.00375	10.497	SLC9A5;SLC6A15;SLC26A7;SLC26A11;SLC26A4	5	104
R-HSA-163685	Integration Of Energy Metabolism	5/105	0.0314586	2.97356	10.2858	KCNJ11;GNG7;GNB4;CACNA1C;CACNA1E	5	105
R-HSA-162582	Signal Transduction	53/2465	0.0317316	1.34922	4.6554	NUP107;FLT1;FLT3;NPY2R;HTR2C;ADRA1D;AP2A2;RGS4;GRM2;SHH;CHEK1;PEA15;RSPO2;RSPO3;STARD8;TRHR;ACTA2;GREM2;COL4A5;COL6A3;PPARG;MYL9;NOTCH2;PLPPR1;ARHGEF25;PTGER3;GPR83;ADRB1;FSTL1;LTBP1;CRHR1;SCUBE2;NPY;GNG7;DRD1;NTSR1;ST3GAL3;GABRQ;KL;MPP3;ANGPT1;HTR1F;PLK1;WNT7A;VEGFC;ARHGAP29;OPRK1;ESR1;REST;DLG5;GNB4;ACKR3;RGS12	53	2465
R-HSA-991365	Activation Of GABAB Receptors	3/42	0.0328104	4.56124	15.5858	GNG7;GNB4;KCNJ2	3	42
R-HSA-112314	Neurotransmitter Receptors And Postsynaptic Signal Transmission	7/182	0.0335394	2.38422	8.09451	GABRQ;MPP3;GNG7;GNB4;AP2A2;KCNJ2;NRGN	7	182
R-HSA-418597	G Alpha (Z) Signaling Events	3/47	0.0436325	4.04188	12.659	RGS4;GNG7;GNB4	3	47
R-HSA-418555	G Alpha (S) Signaling Events	6/153	0.0437023	2.42894	7.60346	GNG7;GNB4;ADRB1;GPR83;DRD1;CRHR1	6	153
R-HSA-9679506	SARS-CoV Infections	11/369	0.0466051	1.83673	5.63149	IFIH1;REST;NUP107;UBE2I;SNRPE;ISG15;GPC4;MASP1;ST3GAL1;AP2A2;ST3GAL3	11	369
R-HSA-9694516	SARS-CoV-2 Infection	9/283	0.0489092	1.95989	5.91453	IFIH1;NUP107;UBE2I;SNRPE;ISG15;GPC4;MASP1;ST3GAL1;ST3GAL3	9	283

## Sheet: pathway.CUMS
ID	Term	Gene.ratio	P.value	Odds.Ratio	Combined.Score	Genes	Overlap	Term.genes
R-HSA-112316	Neuronal System	65/386	1.42225e-09	2.49933	50.914	GABRB2;KCNG2;SNAP25;RAB3A;KCNC2;PRKAG1;KIF17;NPTN;FLOT2;KCNH2;KCND2;KCNK10;ACTN2;ABCC8;SH2D3C;PRKCA;KCNAB1;KCNAB2;KCNAB3;GJD2;ARHGEF9;ADCY9;DNAJC5;KCNQ2;KCNQ5;MAPT;CAMK2B;KCNA1;SLC1A1;ADCY4;GNAI3;KCNA5;PRKX;CPLX1;ADCY6;SLITRK2;SLITRK1;SLITRK4;EPB41L3;AP2S1;KCNMB4;KCNN1;MAPK1;SLC38A2;GRIA3;KCNJ3;GABRA2;GABRQ;GABRA1;KCNJ6;KCNJ10;SYT2;HOMER1;GABRA4;NTRK3;GAD1;KCNJ16;LRFN2;GNAL;GLRB;KCNS1;MDM2;GNB4;G…	65	386
R-HSA-1428517	Citric Acid (TCA) Cycle And Respiratory Electron Transport	33/163	2.2443e-07	3.09871	47.4404	COX19;NDUFB7;NDUFB5;NDUFB4;NDUFA10;ATP5MC2;NDUFB2;ATP5MC3;COX6A1;COX7C;MPC2;PDK4;PDK3;DLAT;LDLR;ATP5MF;DMAC2L;COX8A;NDUFA7;FAHD1;ATP5PB;IDH3G;NUBPL;NDUFA3;NDUFC1;ATP5F1C;COX6C;SDHB;COQ10A;PLPP6;NDUFS5;NDUFS3;NDUFAF3	33	163
R-HSA-977443	GABA Receptor Activation	18/59	2.39154e-07	5.33196	81.2919	GABRA2;GABRQ;GABRB2;GABRA1;KCNJ6;KCNJ10;GABRA4;ADCY4;GNAI3;KCNJ16;ADCY6;ARHGEF9;ADCY9;GNAL;NPTN;GNB4;GNB5;KCNJ3	18	59
R-HSA-2262752	Cellular Responses To Stress	93/722	5.07953e-07	1.82879	26.5045	NCF2;CITED2;FKBP14;HSPB8;UBE2D1;RPL10A;COX6A1;COX7C;XPO1;SIN3B;KHSRP;SCMH1;SESN2;ELOB;CHAC1;ATP6V1E1;RPS10;COX8A;KDM6B;MAP2K4;ATP6V1G1;ATP6V0B;FOS;SIRT1;PDIA6;NCOR2;DNAJC3;PSMA3;CCNE2;PSME3;DNAJB11;BLVRB;PREB;RPL28;UBA52;BLVRA;ATF4;ANAPC2;FKBP5;CAMK2B;DCTN6;COX19;RPL12;HM13;CEBPG;PARN;AAAS;HSPA13;NUP160;HSP90B1;PRDX3;HELZ2;STIP1;MAPK9;EXTL2;HSPH1;PSMB3;NRIP1;SERPINH1;MAPK1;IGFBP7;E2F3;RPL15;ATP6V…	93	722
R-HSA-163200	Respiratory Electron Transport, ATP Synthesis By Chemiosmotic Coupling, Heat Production By Uncoupling Proteins	25/112	9.75529e-07	3.49737	48.4047	COX19;NDUFB7;NDUFB5;NDUFB4;NDUFA10;ATP5MC2;NDUFB2;ATP5MC3;COX6A1;COX7C;ATP5MF;DMAC2L;COX8A;NDUFA7;ATP5PB;NUBPL;NDUFA3;NDUFC1;ATP5F1C;COX6C;SDHB;COQ10A;NDUFS5;NDUFS3;NDUFAF3	25	112
R-HSA-8953897	Cellular Responses To Stimuli	93/736	1.18426e-06	1.78757	24.3939	NCF2;CITED2;FKBP14;HSPB8;UBE2D1;RPL10A;COX6A1;COX7C;XPO1;SIN3B;KHSRP;SCMH1;SESN2;ELOB;CHAC1;ATP6V1E1;RPS10;COX8A;KDM6B;MAP2K4;ATP6V1G1;ATP6V0B;FOS;SIRT1;PDIA6;NCOR2;DNAJC3;PSMA3;CCNE2;PSME3;DNAJB11;BLVRB;PREB;RPL28;UBA52;BLVRA;ATF4;ANAPC2;FKBP5;CAMK2B;DCTN6;COX19;RPL12;HM13;CEBPG;PARN;AAAS;HSPA13;NUP160;HSP90B1;PRDX3;HELZ2;STIP1;MAPK9;EXTL2;HSPH1;PSMB3;NRIP1;SERPINH1;MAPK1;IGFBP7;E2F3;RPL15;ATP6V…	93	736
R-HSA-1296071	Potassium Channels	23/102	2.1751e-06	3.54027	46.1596	KCNH2;KCNG2;KCNJ6;KCNJ10;KCNK10;KCND2;KCNC2;ABCC8;KCNA1;KCNJ16;KCNAB1;KCNA5;KCNAB2;KCNAB3;KCNS1;KCNQ2;GNB4;KCNMB4;KCNN1;KCNQ5;GNB5;KCNJ3;HCN1	23	102
R-HSA-112315	Transmission Across Chemical Synapses	38/246	2.74036e-05	2.22807	23.4055	CAMK2B;GABRB2;SNAP25;RAB3A;SLC1A1;PRKAG1;ADCY4;GNAI3;PRKX;KIF17;CPLX1;ADCY6;AP2S1;NPTN;MAPK1;SLC38A2;GRIA3;KCNJ3;GABRA2;GABRQ;GABRA1;KCNJ6;KCNJ10;ACTN2;GABRA4;GAD1;SH2D3C;KCNJ16;PRKCA;ARHGEF9;ADCY9;GNAL;GLRB;DNAJC5;GNB4;MDM2;MAPT;GNB5	38	246
R-HSA-611105	Respiratory Electron Transport	19/90	4.33991e-05	3.24692	32.6156	COX8A;COX19;NDUFA7;NDUFB7;NDUFB5;NUBPL;NDUFB4;NDUFA3;NDUFA10;NDUFB2;NDUFC1;COX6A1;COX6C;COX7C;SDHB;COQ10A;NDUFS5;NDUFS3;NDUFAF3	19	90
R-HSA-112314	Neurotransmitter Receptors And Postsynaptic Signal Transmission	30/182	5.51655e-05	2.4016	23.5481	CAMK2B;GABRB2;PRKAG1;ADCY4;GNAI3;PRKX;KIF17;ADCY6;NPTN;AP2S1;MAPK1;GRIA3;KCNJ3;GABRA2;GABRQ;GABRA1;KCNJ6;KCNJ10;ACTN2;GABRA4;KCNJ16;PRKCA;ARHGEF9;ADCY9;GNAL;GLRB;GNB4;MDM2;GNB5;MAPT	30	182
R-HSA-597592	Post-translational Protein Modification	145/1383	5.91995e-05	1.45158	14.1306	PGAP1;RAB3A;UBE2D1;TPGS1;POFUT2;FPGT;SCMH1;TRIM25;FBXO6;LARGE1;FBXO9;DDX17;PDIA3;DAXX;ALG9;TRAPPC2L;UBE2E3;USP2;SHISA5;ANK2;LMO7;FBXO10;PDIA6;CAMKMT;DMTF1;RAB37;PSME3;MXRA8;VDAC2;PREB;UBA52;INO80C;INO80E;RAB5B;SPTBN5;NTM;SEL1L;RPN1;EIF5A2;AAAS;NUP160;HSP90B1;SOCS2;NEU3;ADAMTS17;HLTF;PENK;ST3GAL4;MLEC;IGFBP7;RIPK1;SPTBN1;CTSA;FN3K;TRAPPC3;CBX4;FUCA2;GFPT1;TMEM132A;FN1;BTBD6;PHC3;PUM2;CYLD;B4GAT1;G…	145	1383
R-HSA-1296072	Voltage Gated Potassium Channels	12/43	6.52233e-05	4.68532	45.1557	KCNH2;KCNG2;KCND2;KCNS1;KCNC2;KCNA1;KCNQ2;KCNA5;KCNAB1;KCNQ5;KCNAB2;KCNAB3	12	43
R-HSA-392499	Metabolism Of Proteins	189/1890	6.90931e-05	1.38385	13.2574	PGAP1;RAB3A;PARS2;UBE2D1;TPGS1;RPL10A;POFUT2;KIF5C;FPGT;SCMH1;TRIM25;FBXO6;LARGE1;RPS10;FBXO9;RGS7;DDX17;PDIA3;DAXX;ALG9;TRAPPC2L;UBE2E3;USP2;SHISA5;ANK2;LMO7;FBXO10;HSPG2;PDIA6;CAMKMT;DMTF1;PPA2;CCNE2;RAB37;PSME3;MXRA8;VDAC2;PREB;FKBP9;RPL28;UBA52;INO80C;INO80E;ENPEP;RAB5B;SPTBN5;NTM;SEL1L;RPN1;EIF5A2;AAAS;PLA2G7;NUP160;HSP90B1;SOCS2;MRPL20;NEU3;ADAMTS17;HLTF;PENK;ST3GAL4;MLEC;IGFBP7;RIPK1;SPTBN…	189	1890
R-HSA-71387	Metabolism Of Carbohydrates	41/285	7.2048e-05	2.04935	19.547	GALT;GBE1;HEXB;FUT11;HEXA;AKR1B1;PYGM;AAAS;FUT2;NUP160;HS6ST3;HS2ST1;CHSY1;PPP2R1A;NDST4;GPC1;DSEL;CHORDC1;CHST15;ST3GAL4;PGK1;CSGALNACT1;HS3ST3B1;MDH1;GLYCTK;ABCC5;GOT2;B3GALT4;PRKCA;HOOK3;HSPG2;PFKL;G6PC3;GNPDA1;B4GAT1;HOOK2;CSPG4;MAN2B1;ALDOB;UBA52;PFKP	41	285
R-HSA-9006934	Signaling By Receptor Tyrosine Kinases	62/496	9.60378e-05	1.74871	16.177	ITGB1;PRR5;GABRB2;FLT1;NCF2;FLT3;LAMC3;ITGB3;HSPB1;PTPRJ;TIAL1;CDH5;PTBP1;PPP2R1A;CHEK1;KDR;JAK2;ATP6V1E1;ATP6V1G1;ATP6V0B;RBFOX2;PRKCA;FOS;VRK3;ARC;MYCN;CDC37;COL4A5;TRIB1;UBA52;CD274;RNMT;RRAD;SRF;PIK3R4;PIK3R1;STK4;THBS1;THBS3;RAP1B;ERBB2;AP2S1;POLR2F;MAPK1;PTK2B;POLR2H;ATP6V1D;MAP2K5;GABRQ;GABRA1;EGR2;KIDINS220;NTRK3;LAMB1;PTPN12;MAPK11;REST;ID2;ABI1;PKN2;PTPN3;CDK5R1	62	496
R-HSA-1430728	Metabolism	201/2049	0.000120816	1.35485	12.2224	MTRR;HS6ST3;TDO2;PPP2R1A;NDST4;CHORDC1;PDK4;PDK3;CHAC1;RPS10;STARD4;ACSL1;PRKCA;CMBL;HSPG2;PLPP6;ADCY9;PPA2;PSME3;VDAC2;HPRT1;RPL28;UBA52;MGST3;FUT11;PIK3R4;IQGAP1;PIK3R1;AAAS;MTMR4;CIAO3;OAZ2;MTMR7;HSD11B1;HELZ2;NEU3;ST3GAL4;CHST15;PLCG2;HMGCLL1;DMAC2L;CTSA;CHKA;STARD10;NR1D1;SQLE;RPS25;UCK2;B4GAT1;CYP2S1;PPT1;NDUFAF3;ACY3;MTMR12;KCNC2;HEXB;GBE1;HEXA;ADK;AKR1B1;PYGM;COX7C;THTPA;TRMT112;TK1;DLAT;…	201	2049
R-HSA-162582	Signal Transduction	236/2465	0.000135354	1.32334	11.7878	ITSN2;VPS29;TRIO;TFRC;FNBP1L;RXFP1;TIAL1;BAIAP2L2;GPR176;PPP2R1A;CHEK1;KDR;PDK4;PDK3;SOX9;ATP6V1E1;DYNC2H1;ATP6V1G1;RBFOX2;ACTN2;OMG;PRKCA;ARC;SFRP2;ADCY9;PSME3;CDC37;SPATA13;MAML3;TRIB1;UBA52;PFN2;SPTBN5;RRAD;PDE1B;PIK3R4;IQGAP1;PIK3R1;AAAS;MTMR4;MYL12B;PPP3R1;PENK;ST3GAL4;PLCG2;RDH14;SPTBN1;WNT10B;JUN;EGR2;FN1;PHC3;PBX1;CYLD;LPAR6;ID2;FERMT2;CDC42SE2;GABRB2;RARG;PRKAG1;PTPRJ;IKBKB;AKAP12;PPP3CA…	236	2465
R-HSA-8949613	Cristae Formation	9/29	0.000220434	5.43922	45.7978	DMAC2L;APOO;SAMM50;ATP5PB;ATP5MC2;DNAJC11;ATP5MC3;ATP5F1C;ATP5MF	9	29
R-HSA-991365	Activation Of GABAB Receptors	11/42	0.000243018	4.29206	35.7201	KCNJ6;KCNJ10;ADCY9;GNAL;ADCY4;GNAI3;GNB4;KCNJ16;GNB5;ADCY6;KCNJ3	11	42
R-HSA-381183	ATF6 (ATF6-alpha) Activates Chaperone Genes	5/9	0.000256455	15.0825	124.711	HSPA5;NFYB;CALR;ATF4;HSP90B1	5	9
R-HSA-1643685	Disease	171/1736	0.000331296	1.3538	10.8473	MTRR;UBE2D1;RPL10A;ANTXR2;RXFP1;ZDHHC3;GPR176;GOLGA4;TBK1;MPRIP;PPP2R1A;KDR;AP1S2;RCC1;TRIM25;LARGE1;IL6R;RPS10;MAP2K4;DAXX;ALG9;TPM4;SLC11A2;AP1B1;PRKCA;LMO7;HSPG2;ADCY9;CCNE2;PSME3;CDC37;MAML3;HPRT1;RPL28;UBA52;ANAPC2;RRAD;SLC1A1;SEL1L;RPN1;PIK3R4;SUPT4H1;IQGAP1;PIK3R1;AAAS;NUP160;PHF21A;RAP1B;ADAMTS17;PGK1;ST3GAL4;VPS11;PLCG2;RIPK1;SPTBN1;CTSA;SRPK2;UVRAG;CPSF4;JUN;CD163;SYT2;PLK2;GFPT1;FN1;CD…	171	1736
R-HSA-6799198	Complex I Biogenesis	12/51	0.000380504	3.72261	29.3119	NDUFA7;NDUFB7;NDUFB5;NUBPL;NDUFS5;NDUFB4;NDUFA3;NDUFA10;NDUFS3;NDUFB2;NDUFAF3;NDUFC1	12	51
R-HSA-381119	Unfolded Protein Response (UPR)	17/89	0.000382933	2.86086	22.5083	HSPA5;FKBP14;NFYB;CEBPG;GFPT1;PARN;ASNS;PDIA6;HSP90B1;DNAJC3;EXTL2;KHSRP;DNAJB11;PREB;HYOU1;CALR;ATF4	17	89
R-HSA-3000484	Scavenging By Class F Receptors	4/6	0.000457085	24.1189	185.49	HSPH1;HYOU1;CALR;SCARF1	4	6
R-HSA-450341	Activation Of AP-1 Family Of Transcription Factors	5/10	0.00048046	12.0654	92.1886	MAPK11;MAPK9;JUN;MAPK1;FOS	5	10
R-HSA-191273	Cholesterol Biosynthesis	8/26	0.000527107	5.36913	40.5268	FDPS;PLPP6;SQLE;PMVK;CYP51A1;DHCR24;HMGCR;LBR	8	26
R-HSA-3700989	Transcriptional Regulation By TP53	45/354	0.000576937	1.77455	13.2342	PRR5;COX19;BTG2;RRAD;SUPT4H1;PRKAG1;COX6A1;COX7C;SESN3;PPP2R1A;CASP6;CHEK1;SESN2;PMS2;POLR2F;ELOB;POLR2H;TAF9B;YWHAG;ZNF385A;NELFE;YWHAH;COX8A;DAXX;JUN;GADD45A;PRMT1;RFC2;PLK2;USP2;GTF2H1;FOS;COX6C;CDK9;MAPK11;RGCC;GNPDA1;CCNE2;BCL6;CENPJ;MDM2;UBA52;TNRC6A;CDK5R1;TNRC6B	45	354
R-HSA-198725	Nuclear Events (Kinase And Transcription Factor Activation)	13/61	0.000615506	3.27723	24.2287	EGR2;RRAD;SRF;FOS;VRK3;MAPK11;ARC;REST;PPP2R1A;ID2;MAPK1;TRIB1;CDK5R1	13	61
R-HSA-2559580	Oxidative Stress Induced Senescence	17/93	0.000651087	2.7097	19.8807	KDM6B;SUZ12;MAP2K4;JUN;CBX4;FOS;PHC3;MAPK9;MAPK11;CDK6;SCMH1;MDM2;MAPK1;E2F3;UBA52;TNRC6A;TNRC6B	17	93
R-HSA-9675108	Nervous System Development	63/545	0.000719767	1.59679	11.5553	ITGB1;TRIO;ITGB3;USP33;LDB2;RPL10A;PPP3CB;ELOB;SCN5A;RPS10;SCN1B;UPF2;ACTR2;EPHA7;TRPC6;PRKCA;UNC5C;ANK2;UNC5D;RGMA;PSMA3;PSME3;SCN8A;KCNQ2;COL4A5;MYH9;UTRN;RPL28;UBA52;EPHA3;ITGA9;PFN2;SPTBN5;RNMT;RPL12;PIK3R1;HMGCR;MYL12B;DRP2;PSMB3;GPC1;ERBB2;AP2S1;PLXNA2;MAPK1;RPL15;SPTBN1;RPL19;SEMA4A;EGR2;CNTN6;CYP51A1;UPF3A;LAMB1;PSMB8;RPS25;MAPK11;ARPC2;KIF4A;PKN2;RPL22L1;RNPS1;CDK5R1	63	545
R-HSA-381033	ATF6 (ATF6-alpha) Activates Chaperones	5/11	0.000825229	10.0539	71.3813	HSPA5;NFYB;CALR;ATF4;HSP90B1	5	11
R-HSA-163210	Formation Of ATP By Chemiosmotic Coupling	6/16	0.000827261	7.24199	51.3992	DMAC2L;ATP5PB;ATP5MC2;ATP5MC3;ATP5F1C;ATP5MF	6	16
R-HSA-2454202	Fc Epsilon Receptor (FCERI) Signaling	21/130	0.000895575	2.33585	16.3931	MAP2K4;JUN;MAP3K1;UBE2D1;PIK3R1;FOS;RASGRP2;PSMB8;IKBKB;PPP3CA;MAPK9;PPP3R1;PPP3CB;PSMA3;PSMB3;PSME3;PLCG2;UBE2N;MAPK1;PKN2;UBA52	21	130
R-HSA-1474244	Extracellular Matrix Organization	38/291	0.000900676	1.82725	12.8134	FBN2;ITGB1;LAMC3;ITGB3;ICAM2;PLOD2;FBLN1;NID1;FBLN2;THBS1;FBLN5;ADAMTS3;ADAMTS1;KDR;SERPINH1;CTSD;CRTAP;ITGA4;FN1;PRKCA;LAMB1;P3H3;HSPG2;ASPN;MMP14;BMP2;MMP16;DMTF1;P4HA1;COL5A3;COL5A2;COL8A1;COL4A5;TLL1;P4HB;DDR2;FBN1;ITGA9	38	291
R-HSA-111885	Opioid Signaling	16/88	0.000984721	2.69081	18.6289	CAMK2B;PDE1B;ADCY4;GNAI3;PRKCA;PRKX;ADCY6;PPP3CA;PPP3CB;PPP3R1;ADCY9;GNAL;PPP2R1A;GNB4;MAPK1;GNB5	16	88
R-HSA-8957275	Post-translational Protein Phosphorylation	18/106	0.00112735	2.47787	16.8195	FUCA2;TMEM132A;SHISA5;FN1;LAMB1;PDIA6;HSP90B1;DNAJC3;PPP3CA;DMTF1;PENK;MXRA8;CALU;VWA1;IGFBP7;P4HB;MFGE8;FBN1	18	106
R-HSA-2871796	FCERI Mediated MAPK Activation	8/29	0.0011775	4.60137	31.0333	MAPK9;MAP2K4;JUN;MAP3K1;PLCG2;MAPK1;PKN2;FOS	8	29
R-HSA-3899300	SUMOylation Of Transcription Cofactors	10/43	0.00126674	3.66259	24.4343	DDX17;NCOR2;DAXX;UHRF2;CBX4;NRIP1;SCMH1;SUMO2;PHC3;TOPORS	10	43
R-HSA-1445148	Translocation Of SLC2A4 (GLUT4) To Plasma Membrane	11/51	0.00142817	3.32472	21.7814	C2CD5;TBC1D4;RAB14;PRKAG1;MYH9;STX4;KIFAP3;YWHAG;EXOC2;YWHAH;EXOC1	11	51
R-HSA-5663205	Infectious Disease	99/961	0.0015541	1.40786	9.10444	RPL10A;ANTXR2;RXFP1;ZDHHC3;GPR176;TBK1;AP1S2;RCC1;TRIM25;IL6R;RPS10;MAP2K4;DAXX;AP1B1;PRKCA;HSPG2;ADCY9;PSME3;RPL28;UBA52;RPN1;PIK3R4;SUPT4H1;AAAS;NUP160;PHF21A;PGK1;PLCG2;ST3GAL4;VPS11;RIPK1;SRPK2;UVRAG;CPSF4;JUN;CD163;SYT2;PLK2;CDK9;RPS25;ARPC2;GNB4;STT3A;UBE2N;CALR;GNB5;ITGB1;SNAP25;IKBKB;XPO1;ELOB;JAK2;YWHAG;NELFE;YWHAH;TOMM70;ACTR2;ITGA4;PARP1;PRMT1;TUBB;VPS37D;RANGAP1;PARP9;NCOR2;DNAJC3;HCK…	99	961
R-HSA-8986944	Transcriptional Regulation By MECP2	12/60	0.00176599	3.02315	19.1638	NCOR2;CAMK2B;RBFOX1;RNMT;GAD1;DGCR8;PRKCA;LBR;PVALB;TNRC6A;FKBP5;TNRC6B	12	60
R-HSA-170670	Adenylate Cyclase Inhibitory Pathway	5/13	0.00201856	7.53962	46.7862	ADCY9;GNAL;ADCY4;GNAI3;ADCY6	5	13
R-HSA-1852241	Organelle Biogenesis And Maintenance	35/275	0.00218139	1.77188	10.8577	PRKAG1;ATP5MC2;ATP5MC3;TFB1M;KIF17;MCHR1;HELZ2;APOO;SAMM50;ARL13B;PPP2R1A;BBS9;KIFAP3;CEP290;GABPA;ATP5MF;YWHAG;CDK5RAP2;DYNC2H1;DMAC2L;MKKS;ATP5PB;TUBB;DNAJC11;PRKCA;NR1D1;ATP5F1C;TUBB4B;MAPK11;IFT43;CENPJ;DYNLRB1;EXOC2;EXOC1;SDCCAG8	35	275
R-HSA-9031628	NGF-stimulated Transcription	9/39	0.0023229	3.62418	21.9804	EGR2;ARC;REST;RRAD;SRF;ID2;FOS;TRIB1;CDK5R1	9	39
R-HSA-422475	Axon Guidance	58/519	0.00249497	1.53361	9.19167	ITGB1;TRIO;ITGB3;USP33;LDB2;RPL10A;PPP3CB;ELOB;SCN5A;RPS10;SCN1B;UPF2;ACTR2;EPHA7;TRPC6;PRKCA;UNC5C;ANK2;UNC5D;RGMA;PSMA3;PSME3;SCN8A;KCNQ2;COL4A5;MYH9;RPL28;UBA52;EPHA3;ITGA9;PFN2;SPTBN5;RNMT;RPL12;PIK3R1;MYL12B;PSMB3;GPC1;ERBB2;AP2S1;PLXNA2;MAPK1;RPL15;SPTBN1;RPL19;SEMA4A;CNTN6;UPF3A;LAMB1;PSMB8;RPS25;MAPK11;ARPC2;KIF4A;PKN2;RPL22L1;RNPS1;CDK5R1	58	519
R-HSA-73857	RNA Polymerase II Transcription	128/1312	0.00263074	1.3278	7.88779	UBE2D1;COX6A1;SESN3;ZFP30;PPP2R1A;SCMH1;SESN2;CHEK1;PAPOLA;EPC1;ZNF688;SOX9;DAXX;RBFOX1;USP2;PRKCA;LIFR;ZNF12;CDC40;CLDN5;CCNE2;PSME3;ZNF558;SRSF4;ZNF436;MAML3;SRSF6;SRSF7;UBA52;PVALB;ANAPC2;FKBP5;KMT2D;COX19;RRAD;KMT2C;NOP2;SUPT4H1;ZNF25;MED30;ZNF704;RPRD1B;NRBF2;ZNF786;ZNF664;SOCS4;CPSF4;JUN;CBX4;GADD45A;CBX3;PLK2;NR1D2;ESRRG;NR1D1;SMARCA2;PHC3;CDK9;NR4A1;BMP2;RGCC;CDK6;NR4A3;BCL6;MDM2;ITGBL1;N…	128	1312
R-HSA-1592230	Mitochondrial Biogenesis	15/89	0.00303612	2.45257	14.218	DMAC2L;ATP5PB;PRKAG1;ATP5MC2;DNAJC11;ATP5MC3;NR1D1;TFB1M;ATP5F1C;HELZ2;APOO;MAPK11;SAMM50;GABPA;ATP5MF	15	89
R-HSA-170660	Adenylate Cyclase Activating Pathway	4/9	0.00318142	9.64598	55.4685	ADCY9;GNAL;ADCY4;ADCY6	4	9
R-HSA-9707564	Cytoprotection By HMOX1	11/57	0.00362427	2.89012	16.2428	COX8A;NCOR2;HELZ2;COX19;SIN3B;HM13;BLVRB;COX6A1;COX6C;COX7C;BLVRA	11	57
R-HSA-5696399	Global Genome Nucleotide Excision Repair (GG-NER)	14/82	0.00364469	2.49022	13.9813	INO80C;INO80E;PARP1;RFC2;MCRS1;GTF2H1;ACTR8;RAD23B;POLD4;POLD1;SUMO2;UBE2N;COPS8;UBA52	14	82
R-HSA-1606341	IRF3 Mediated Activation Of Type 1 IFN	3/5	0.00401007	18.0773	99.7679	TBK1;IRF3;DTX4	3	5
R-HSA-111996	Ca-dependent Events	8/35	0.00427818	3.57768	19.5135	CAMK2B;ADCY9;PDE1B;ADCY4;MAPK1;PRKX;PRKCA;ADCY6	8	35
R-HSA-5357905	Regulation Of TNFR1 Signaling	8/35	0.00427818	3.57768	19.5135	IKBKB;CYLD;USP2;RACK1;RIPK1;CFLAR;TANK;UBA52	8	35
R-HSA-194315	Signaling By Rho GTPases	68/644	0.00452008	1.4396	7.77273	ITSN2;ITGB1;TRIO;TFRC;FAM13B;NCF2;FNBP1L;RND3;AKAP12;AKAP13;BAIAP2L2;XPO1;PPP2R1A;ARHGDIB;FLOT2;LBR;YWHAG;YWHAH;ACTR2;TPM4;PRKCA;RANGAP1;NIPSNAP2;ARHGAP10;CLIP1;ARHGEF9;ALS2;CDC37;SPATA13;ARHGEF3;NDUFS3;MYH9;DBN1;PFN2;BLTP3B;ARHGEF26;ARHGEF25;SRF;PIK3R4;IQGAP1;PIK3R1;AAAS;FAM169A;NUP160;MYL12B;ARHGAP22;STIP1;SAMM50;ARL13B;STK38;MAPK1;PTK2B;SPTBN1;EGR2;KIDINS220;ARHGAP29;SEMA4F;WDR11;MAPK11;DIAPH3…	68	644
R-HSA-1650814	Collagen Biosynthesis And Modifying Enzymes	12/67	0.00460826	2.63738	14.1888	CRTAP;ADAMTS3;P4HA1;COL5A3;COL5A2;SERPINH1;COL4A5;COL8A1;PLOD2;TLL1;P3H3;P4HB	12	67
R-HSA-162909	Host Interactions Of HIV Factors	19/130	0.00487828	2.07235	11.031	RANBP1;AP1B1;AAAS;RANGAP1;NUP160;PSMB8;CDK9;HCK;PSMA3;XPO1;PSMB3;PSME3;AP1S2;AP2S1;RCC1;ELOB;PKN2;SLC25A5;UBA52	19	130
R-HSA-168164	Toll Like Receptor 3 (TLR3) Cascade	16/103	0.00516944	2.22506	11.7149	MAP2K4;JUN;UBE2D1;FOS;VRK3;TANK;IKBKB;MAPK9;MAPK11;TBK1;IRF3;PPP2R1A;UBE2N;MAPK1;RIPK1;UBA52	16	103
R-HSA-162906	HIV Infection	29/229	0.00532748	1.75858	9.20596	RNMT;VPS4A;SUPT4H1;AAAS;NUP160;XPO1;PSMB3;AP1S2;AP2S1;RCC1;POLR2F;ELOB;POLR2H;TAF9B;NELFE;RANBP1;RNGTT;AP1B1;VPS37D;GTF2H1;RANGAP1;PSMB8;CDK9;HCK;PSMA3;PSME3;PKN2;SLC25A5;UBA52	29	229
R-HSA-9716542	Signaling By Rho GTPases, Miro GTPases And RHOBTB3	69/660	0.00536213	1.42347	7.44248	ITSN2;ITGB1;TRIO;TFRC;FAM13B;NCF2;FNBP1L;RND3;AKAP12;AKAP13;BAIAP2L2;XPO1;PPP2R1A;ARHGDIB;FLOT2;LBR;YWHAG;YWHAH;ACTR2;TPM4;PRKCA;RANGAP1;NIPSNAP2;ARHGAP10;CLIP1;ARHGEF9;ALS2;CDC37;SPATA13;ARHGEF3;NDUFS3;MYH9;DBN1;PFN2;BLTP3B;ARHGEF26;ARHGEF25;SRF;PIK3R4;IQGAP1;PIK3R1;AAAS;FAM169A;NUP160;MYL12B;ARHGAP22;STIP1;SAMM50;ARL13B;STK38;MFN1;MAPK1;PTK2B;SPTBN1;EGR2;KIDINS220;ARHGAP29;SEMA4F;WDR11;MAPK11;D…	69	660
R-HSA-445095	Interaction Between L1 And Ankyrins	7/29	0.00537842	3.84046	20.0678	SPTBN5;SCN8A;KCNQ2;ANK2;SCN5A;SCN1B;SPTBN1	7	29
R-HSA-5675482	Regulation Of Necroptotic Cell Death	7/29	0.00537842	3.84046	20.0678	CDC37;FLOT2;RIPK1;CFLAR;TANK;OGT;UBA52	7	29
R-HSA-112040	G-protein Mediated Events	10/52	0.00557099	2.87635	14.9288	CAMK2B;ADCY9;GNAL;PDE1B;ADCY4;GNAI3;MAPK1;PRKCA;PRKX;ADCY6	10	52
R-HSA-9012999	RHO GTPase Cycle	49/441	0.00574015	1.52027	7.84502	ITSN2;ITGB1;TRIO;TFRC;FAM13B;NCF2;FNBP1L;RND3;AKAP12;AKAP13;BAIAP2L2;ARHGDIB;FLOT2;LBR;TPM4;NIPSNAP2;ARHGAP10;ARHGEF9;ALS2;CDC37;SPATA13;ARHGEF3;NDUFS3;DBN1;BLTP3B;ARHGEF26;ARHGEF25;IQGAP1;PIK3R1;AAAS;FAM169A;ARHGAP22;STIP1;SAMM50;ARL13B;STK38;PTK2B;SPTBN1;EGR2;KIDINS220;ARHGAP29;SEMA4F;WDR11;DIAPH3;DNMBP;ABI1;PKN2;FERMT2;CDC42SE2	49	441
R-HSA-381426	Regulation Of IGF Transport And Uptake By IGFBPs	18/123	0.00596084	2.07477	10.6281	FUCA2;TMEM132A;SHISA5;FN1;LAMB1;PDIA6;HSP90B1;DNAJC3;PPP3CA;DMTF1;PENK;MXRA8;CALU;VWA1;IGFBP7;P4HB;MFGE8;FBN1	18	123
R-HSA-5696394	DNA Damage Recognition In GG-NER	8/37	0.00612234	3.33058	16.972	INO80C;INO80E;PARP1;MCRS1;ACTR8;COPS8;RAD23B;UBA52	8	37
R-HSA-187037	Signaling By NTRK1 (TRKA)	17/114	0.0061243	2.12064	10.8057	EGR2;RRAD;KIDINS220;SRF;PIK3R1;FOS;VRK3;MAPK11;ARC;REST;PPP2R1A;ID2;AP2S1;MAPK1;TRIB1;MAP2K5;CDK5R1	17	114
R-HSA-383280	Nuclear Receptor Transcription Pathway	10/53	0.00640502	2.8093	14.1889	NCOR2;NR4A1;RARG;NR4A3;NR6A1;ESRRG;NR1D2;NRBF2;NR1D1;RXRG	10	53
R-HSA-450282	MAPK Targets/ Nuclear Events Mediated By MAP Kinases	7/30	0.00655914	3.67329	18.4652	MAPK9;MAPK11;JUN;PPP2R1A;MAPK1;FOS;VRK3	7	30
R-HSA-8953854	Metabolism Of RNA	69/666	0.00658817	1.40869	7.07514	HBS1L;RBM28;SMG1;HNRNPU;HSPB1;CWC25;ADARB1;RPL10A;TFB1M;TRMT112;PTBP1;XPO1;PPP2R1A;KHSRP;PAPOLA;RPS10;UPF2;TEX10;PRKCA;CDC40;WDR77;PSMA3;CTU1;PSME3;DNAJC5;SRSF4;SRSF6;RPL28;UBA52;SRSF7;SF3B4;DDX6;RNMT;RPL12;SRRT;NOP2;PARN;AAAS;LAGE3;NUP160;ZFP36L1;EMG1;PDCD11;PABPN1;PSMB3;DHX37;POLR2F;SNRPB2;RPL15;POLR2H;EIF4E;TRDMT1;RPL19;CPSF4;RNGTT;UPF3A;GTF2H1;PSMB8;BYSL;LSM8;RPS25;BOP1;MAPK11;LAS1L;HNRNPA2B1…	69	666
R-HSA-450294	MAP Kinase Activation	11/62	0.00702892	2.60607	12.9202	IKBKB;MAP2K4;MAPK9;MAPK11;JUN;PPP2R1A;UBE2N;MAPK1;FOS;VRK3;UBA52	11	62
R-HSA-6796648	TP53 Regulates Transcription Of DNA Repair Genes	11/62	0.00702892	2.60607	12.9202	CDK9;JUN;CHEK1;SUPT4H1;PMS2;POLR2F;ELOB;GTF2H1;FOS;POLR2H;NELFE	11	62
R-HSA-9656223	Signaling By RAF1 Mutants	8/38	0.00724424	3.21938	15.8637	CAMK2B;RAP1B;APBB1IP;ITGB3;FN1;MAPK1;IQGAP1;JAK2	8	38
R-HSA-1660517	Synthesis Of PIPs At Late Endosome Membrane	4/11	0.00735742	6.88924	33.8403	VAC14;PIK3R4;MTMR4;MTMR7	4	11
R-HSA-166166	MyD88-independent TLR4 Cascade	16/107	0.00748778	2.12679	10.4095	MAP2K4;JUN;UBE2D1;FOS;VRK3;TANK;IKBKB;MAPK9;MAPK11;TBK1;IRF3;PPP2R1A;UBE2N;MAPK1;RIPK1;UBA52	16	107
R-HSA-74160	Gene Expression (Transcription)	136/1449	0.0075349	1.26991	6.20756	TDRKH;UBE2D1;COX6A1;IPO8;SESN3;ZFP30;PPP2R1A;SCMH1;SESN2;CHEK1;PAPOLA;EPC1;ZNF688;SOX9;DAXX;RBFOX1;USP2;PRKCA;LIFR;ZNF12;CDC40;CLDN5;CCNE2;PSME3;ZNF558;SRSF4;ZNF436;MAML3;SRSF6;SRSF7;UBA52;PVALB;ANAPC2;FKBP5;KMT2D;COX19;RRAD;KMT2C;NOP2;SUPT4H1;AAAS;ZNF25;NUP160;MED30;ZNF704;RPRD1B;NRBF2;ZNF786;ZNF664;SOCS4;CPSF4;JUN;CBX4;GADD45A;CBX3;PLK2;NR1D2;ESRRG;NR1D1;SMARCA2;PHC3;CDK9;NR4A1;BMP2;RGCC;CDK6;N…	136	1449
R-HSA-212436	Generic Transcription Pathway	114/1190	0.00767313	1.2965	6.314	UBE2D1;COX6A1;SESN3;ZFP30;PPP2R1A;SCMH1;SESN2;CHEK1;EPC1;ZNF688;SOX9;DAXX;RBFOX1;USP2;PRKCA;LIFR;ZNF12;CLDN5;CCNE2;PSME3;ZNF558;ZNF436;MAML3;UBA52;PVALB;ANAPC2;FKBP5;KMT2D;COX19;RRAD;KMT2C;NOP2;SUPT4H1;ZNF25;MED30;ZNF704;NRBF2;ZNF786;ZNF664;SOCS4;JUN;CBX4;GADD45A;CBX3;PLK2;NR1D2;ESRRG;NR1D1;SMARCA2;PHC3;CDK9;NR4A1;BMP2;RGCC;CDK6;NR4A3;BCL6;MDM2;ITGBL1;PRR5;BTG2;RARG;CITED2;PRKAG1;LDB2;COX7C;SIN3B…	114	1190
R-HSA-70326	Glucose Metabolism	14/89	0.00767802	2.25694	10.9899	MDH1;GOT2;PRKCA;HOOK3;AAAS;NUP160;PFKL;G6PC3;GNPDA1;HOOK2;PPP2R1A;PGK1;ALDOB;PFKP	14	89
R-HSA-5213460	RIPK1-mediated Regulated Necrosis	7/31	0.00792212	3.52004	17.0303	CDC37;FLOT2;RIPK1;CFLAR;TANK;OGT;UBA52	7	31
R-HSA-162599	Late Phase Of HIV Life Cycle	19/136	0.00793222	1.96543	9.50643	RANBP1;RNGTT;RNMT;VPS4A;SUPT4H1;VPS37D;GTF2H1;AAAS;RANGAP1;NUP160;CDK9;XPO1;RCC1;POLR2F;ELOB;POLR2H;TAF9B;UBA52;NELFE	19	136
R-HSA-5696398	Nucleotide Excision Repair	16/108	0.00818128	2.10356	10.1095	INO80C;INO80E;PARP1;RFC2;MCRS1;GTF2H1;ACTR8;RAD23B;POLD4;POLD1;SUMO2;UBE2N;POLR2F;POLR2H;COPS8;UBA52	16	108
R-HSA-373760	L1CAM Interactions	15/99	0.00836601	2.15942	10.3298	ITGB1;SPTBN5;CNTN6;ITGB3;ANK2;LAMB1;SCN8A;KIF4A;KCNQ2;AP2S1;MAPK1;SCN5A;SCN1B;SPTBN1;ITGA9	15	99
R-HSA-5628897	TP53 Regulates Metabolic Genes	13/81	0.00845706	2.31082	11.029	COX8A;COX19;PRKAG1;COX6A1;COX6C;COX7C;GNPDA1;SESN3;SESN2;YWHAG;TNRC6A;YWHAH;TNRC6B	13	81
R-HSA-1566948	Elastic Fibre Formation	8/39	0.00851426	3.11536	14.8479	FBN2;ITGB1;BMP2;ITGB3;FBLN1;FBLN2;FBLN5;FBN1	8	39
R-HSA-381042	PERK Regulates Gene Expression	7/32	0.00948288	3.37906	15.7406	HSPA5;NFYB;KHSRP;CEBPG;PARN;ASNS;ATF4	7	32
R-HSA-381070	IRE1alpha Activates Chaperones	9/48	0.00987708	2.78647	12.8666	DNAJC3;EXTL2;HSPA5;FKBP14;GFPT1;DNAJB11;HYOU1;PREB;PDIA6	9	48
R-HSA-9013148	CDC42 GTPase Cycle	20/149	0.0101262	1.87643	8.61775	EGR2;TRIO;FAM13B;TFRC;ARHGEF26;ARHGEF25;ARHGAP29;IQGAP1;PIK3R1;FNBP1L;ARHGAP22;ARHGAP10;ARHGEF9;DIAPH3;DNMBP;ARHGDIB;SPATA13;PKN2;LBR;CDC42SE2	20	149
R-HSA-1630316	Glycosaminoglycan Metabolism	17/120	0.0101568	1.99646	9.16297	CSGALNACT1;HS3ST3B1;HEXB;ABCC5;HEXA;HSPG2;HS6ST3;HS2ST1;B4GAT1;CHSY1;NDST4;DSEL;GPC1;CHORDC1;CHST15;ST3GAL4;CSPG4	17	120
R-HSA-9013973	TICAM1-dependent Activation Of IRF3/IRF7	4/12	0.0103734	6.02776	27.5379	TBK1;IRF3;TANK;UBA52	4	12
R-HSA-5653656	Vesicle-mediated Transport	65/637	0.0112483	1.38319	6.20714	ITSN2;SCOC;C2CD5;RAB3A;TFRC;DENND1A;PRKAG1;FNBP1L;BICD2;SLC2A8;AP4M1;GOLGA4;KIF5C;AP1S2;TRAPPC12;MAN1A1;KIFAP3;SCARF1;YWHAG;YWHAH;TPD52;GABARAPL2;ACTR2;TRAPPC2L;AP1B1;VPS37D;ANK2;RAB33A;GJD2;ALS2;TBC1D4;TBC1D24;MYH9;PREB;UBA52;EXOC2;EXOC1;DCTN6;RAB5B;SPTBN5;VPS4A;HSP90B1;HSPH1;CUX1;VPS52;AP2S1;TBC1D14;STX4;AP4S1;LDLR;KIAA0319;SPTBN1;TRAPPC3;CD163;SYT2;GALNT2;ARPC2;RAB14;KIF26B;KIF4A;HYOU1;CALR;CO…	65	637
R-HSA-111997	CaM Pathway	7/33	0.0112568	3.24892	14.5772	CAMK2B;ADCY9;PDE1B;ADCY4;PRKX;PRKCA;ADCY6	7	33
R-HSA-2559585	Oncogene Induced Senescence	7/33	0.0112568	3.24892	14.5772	CDK6;MDM2;MAPK1;E2F3;UBA52;TNRC6A;TNRC6B	7	33
R-HSA-3000171	Non-integrin membrane-ECM Interactions	8/41	0.0115438	2.92624	13.0557	ITGB1;LAMC3;ITGB3;LAMB1;PRKCA;THBS1;HSPG2;DDR2	8	41
R-HSA-6802955	Paradoxical Activation Of RAF Signaling By Kinase Inactive BRAF	8/41	0.0115438	2.92624	13.0557	CAMK2B;RAP1B;APBB1IP;ITGB3;FN1;MAPK1;IQGAP1;JAK2	8	41
R-HSA-166520	Signaling By NTRKs	18/132	0.0121834	1.91004	8.41883	EGR2;RRAD;KIDINS220;SRF;NTRK3;PIK3R1;FOS;VRK3;MAPK11;ARC;REST;PPP2R1A;ID2;AP2S1;MAPK1;TRIB1;MAP2K5;CDK5R1	18	132
R-HSA-5357956	TNFR1-induced NFkappaB Signaling Pathway	6/26	0.012267	3.61903	15.9268	IKBKB;CYLD;USP2;RACK1;RIPK1;TANK	6	26
R-HSA-5683057	MAPK Family Signaling Cascades	36/318	0.0123246	1.54852	6.80755	CAMK2B;SPTBN5;RNMT;FLT3;ITGB3;HSPB1;IQGAP1;PIK3R1;RAP1B;XPO1;PPP2R1A;PSMB3;PEA15;ERBB2;MAPK1;SHOC2;JAK2;IL6R;SPTBN1;JUN;ANGPT1;ACTN2;FN1;PRKCA;ETV4;PSMB8;APBB1IP;PSMA3;PSME3;RASA2;PKN2;TEK;UBA52;TNRC6A;PTPN3;TNRC6B	36	318
R-HSA-888590	GABA Synthesis, Release, Reuptake And Degradation	5/19	0.01239	4.30696	18.9113	SNAP25;RAB3A;GAD1;DNAJC5;CPLX1	5	19
R-HSA-111931	PKA-mediated Phosphorylation Of CREB	5/19	0.01239	4.30696	18.9113	ADCY9;ADCY4;PRKCA;PRKX;ADCY6	5	19
R-HSA-168927	TICAM1, RIP1-mediated IKK Complex Recruitment	5/19	0.01239	4.30696	18.9113	IKBKB;UBE2N;UBE2D1;RIPK1;UBA52	5	19
R-HSA-9711123	Cellular Response To Chemical Stress	23/182	0.0123992	1.75135	7.68863	COX8A;COX19;NCF2;HM13;COX6A1;COX6C;COX7C;PSMB8;HELZ2;PRDX3;NCOR2;GCLC;PSMA3;SIN3B;PSMB3;PSME3;MAFG;SESN2;BLVRB;P4HB;UBA52;BLVRA;ATF4	23	182
R-HSA-162791	Attachment Of GPI Anchor To uPAR	3/7	0.0124842	9.0377	39.6148	PIGS;PGAP1;PIGK	3	7
R-HSA-9027277	Erythropoietin Activates Phospholipase C Gamma (PLCG)	3/7	0.0124842	9.0377	39.6148	PLCG2;JAK2;EPOR	3	7
R-HSA-5652084	Fructose Metabolism	3/7	0.0124842	9.0377	39.6148	GLYCTK;AKR1B1;ALDOB	3	7
R-HSA-1793185	Chondroitin Sulfate/Dermatan Sulfate Metabolism	9/50	0.0128638	2.65026	11.5375	CSGALNACT1;CHSY1;HEXB;DSEL;GPC1;HEXA;CHST15;CSPG4;HSPG2	9	50
R-HSA-432040	Vasopressin Regulates Renal Water Homeostasis Via Aquaporins	8/42	0.0133257	2.84002	12.2634	ADCY9;MYO5B;ADCY4;GNB4;PRKCA;GNB5;RAB11FIP2;ADCY6	8	42
R-HSA-422356	Regulation Of Insulin Secretion	12/77	0.0139666	2.23042	9.5263	CHRM3;KCNG2;SNAP25;MARCKS;KCNC2;ABCC8;GNB4;PRKCA;IQGAP1;GNB5;ADRA2A;ADCY6	12	77
R-HSA-5357786	TNFR1-induced Proapoptotic Signaling	4/13	0.0140866	5.35772	22.8374	CYLD;USP2;RIPK1;TANK	4	13
R-HSA-163685	Integration Of Energy Metabolism	15/105	0.0140959	2.0148	8.58682	CHRM3;KCNG2;SNAP25;KCNC2;ABCC8;ADCY4;PRKCA;IQGAP1;ADRA2A;ADCY6;MARCKS;ADCY9;PPP2R1A;GNB4;GNB5	15	105
R-HSA-380994	ATF4 Activates Genes In Response To Endoplasmic Reticulum Stress	6/27	0.0147714	3.44651	14.5273	NFYB;KHSRP;CEBPG;PARN;ASNS;ATF4	6	27
R-HSA-2559583	Cellular Senescence	21/165	0.0151801	1.76474	7.39031	KDM6B;SUZ12;MAP2K4;JUN;CBX4;UBE2D1;FOS;PHC3;MAPK9;MAPK11;CDK6;CCNE2;SCMH1;MDM2;MAPK1;IGFBP7;E2F3;UBA52;TNRC6A;ANAPC2;TNRC6B	21	165
R-HSA-9634597	GPER1 Signaling	8/43	0.0153004	2.75872	11.5311	ITGB1;ADCY9;ADCY4;GNAI3;GNB4;PRKCA;GNB5;ADCY6	8	43
R-HSA-400253	Circadian Clock	11/69	0.015472	2.29067	9.54918	HELZ2;NFIL3;NRIP1;BHLHE41;CRY1;CREM;BMAL2;NR1D1;SIRT1;UBA52;BMAL1	11	69
R-HSA-70171	Glycolysis	11/69	0.015472	2.29067	9.54918	PFKL;GNPDA1;HOOK2;PPP2R1A;PGK1;PRKCA;ALDOB;HOOK3;AAAS;NUP160;PFKP	11	69
R-HSA-448424	Interleukin-17 Signaling	11/69	0.015472	2.29067	9.54918	IKBKB;MAP2K4;MAPK9;MAPK11;JUN;PPP2R1A;UBE2N;MAPK1;FOS;VRK3;UBA52	11	69
R-HSA-1296065	Inwardly Rectifying K+ Channels	7/35	0.0155043	3.01652	12.5688	KCNJ6;KCNJ10;ABCC8;GNB4;KCNJ16;GNB5;KCNJ3	7	35
R-HSA-532668	N-glycan Trimming In ER And Calnexin/Calreticulin Cycle	7/35	0.0155043	3.01652	12.5688	PDIA3;SEL1L;MLEC;CALR;RAD23B;RNF185;UBA52	7	35
R-HSA-3247509	Chromatin Modifying Enzymes	28/238	0.0157881	1.61513	6.70036	KDM5A;SUV39H2;KMT2D;ENY2;KMT2C;JADE1;SGF29;PHF21A;NSD3;EPC1;KMT5B;SUPT20H;JAK2;KDM6A;SUZ12;KDM6B;ACTL6B;KDM2B;PRMT1;MCRS1;SMARCA2;WDR77;MSL1;NCOR2;REST;ZZZ3;BRWD1;OGT	28	238
R-HSA-75893	TNF Signaling	8/44	0.0174786	2.68195	10.8532	IKBKB;CYLD;USP2;RACK1;RIPK1;CFLAR;TANK;UBA52	8	44
R-HSA-2129379	Molecules Associated With Elastic Fibres	6/28	0.0176097	3.28967	13.288	ITGB1;BMP2;ITGB3;FBLN1;FBLN2;FBLN5	6	28
R-HSA-376176	Signaling By ROBO Receptors	25/209	0.0179676	1.64492	6.61124	RPL12;USP33;LDB2;RPL10A;PPP3CB;PSMB3;GPC1;ELOB;RPL15;RPS10;RPL19;UPF2;PRKCA;UPF3A;PSMB8;RPS25;PSMA3;PSME3;COL4A5;RNPS1;PKN2;RPL22L1;RPL28;UBA52;PFN2	25	209
R-HSA-156581	Methylation	4/14	0.0185441	4.82169	19.227	TRMT112;MTRR;NNMT;MAT2B	4	14
R-HSA-5607764	CLEC7A (Dectin-1) Signaling	14/99	0.0188041	1.99033	7.90894	UBE2D1;PSMB8;IKBKB;PPP3CA;PPP3R1;PPP3CB;PSMA3;PSMB3;PSME3;PLCG2;UBE2N;UBA52;MAP3K14;UBE2M	14	99
R-HSA-379726	Mitochondrial tRNA Aminoacylation	5/21	0.0190841	3.76818	14.9178	GARS1;PPA2;PARS2;DTD1;WARS2	5	21
R-HSA-1606322	ZBP1(DAI) Mediated Induction Of Type I IFNs	5/21	0.0190841	3.76818	14.9178	IKBKB;TBK1;IRF3;RIPK1;DTX4	5	21
R-HSA-5687128	MAPK6/MAPK4 Signaling	13/90	0.0196209	2.03973	8.0185	JUN;HSPB1;PRKCA;ETV4;PSMB8;PSMA3;XPO1;PSMB3;PSME3;PKN2;UBA52;TNRC6A;TNRC6B	13	90
R-HSA-162587	HIV Life Cycle	19/149	0.0198263	1.76763	6.93044	RANBP1;RNGTT;RNMT;VPS4A;SUPT4H1;VPS37D;GTF2H1;AAAS;RANGAP1;NUP160;CDK9;XPO1;RCC1;POLR2F;ELOB;POLR2H;TAF9B;UBA52;NELFE	19	149
R-HSA-76002	Platelet Activation, Signaling And Aggregation	29/254	0.0206132	1.56104	6.0597	DGKB;ITGB3;OLA1;GNAI3;PIK3R1;RASGRP2;THBS1;ABHD12;RAP1B;PLCG2;MAPK1;STX4;CHID1;P2RY12;TRPC6;HSPA5;ACTN2;FN1;PRKCA;LHFPL2;CYRIB;ADRA2A;MANF;APBB1IP;SELENOP;CALU;GNB4;GNB5;F2RL2	29	254
R-HSA-71406	Pyruvate Metabolism And Citric Acid (TCA) Cycle	9/54	0.0207731	2.41415	9.35267	PLPP6;FAHD1;IDH3G;MPC2;PDK4;PDK3;DLAT;SDHB;LDLR	9	54
R-HSA-1296041	Activation Of G Protein Gated Potassium Channels	6/29	0.0208004	3.14647	12.1856	KCNJ6;KCNJ10;GNB4;KCNJ16;GNB5;KCNJ3	6	29
R-HSA-9619665	EGR2 And SOX10-mediated Initiation Of Schwann Cell Myelination	6/29	0.0208004	3.14647	12.1856	DRP2;EGR2;CYP51A1;LAMB1;HMGCR;UTRN	6	29
R-HSA-166016	Toll Like Receptor 4 (TLR4) Cascade	18/140	0.0212581	1.78401	6.87025	MAP2K4;JUN;MAP3K1;UBE2D1;FOS;VRK3;TANK;IKBKB;MAPK9;MAPK11;TBK1;IRF3;PPP2R1A;PLCG2;UBE2N;MAPK1;RIPK1;UBA52	18	140
R-HSA-381038	XBP1(S) Activates Chaperone Genes	8/46	0.0224866	2.54052	9.64084	DNAJC3;EXTL2;FKBP14;GFPT1;DNAJB11;HYOU1;PREB;PDIA6	8	46
R-HSA-3000157	Laminin Interactions	5/22	0.0231755	3.54633	13.3507	ITGB1;LAMC3;LAMB1;NID1;HSPG2	5	22
R-HSA-168898	Toll-like Receptor Cascades	20/162	0.0235728	1.70344	6.3839	MAP2K4;JUN;MAP3K1;PIK3R4;UBE2D1;FOS;VRK3;TANK;HSP90B1;IKBKB;MAPK9;MAPK11;TBK1;IRF3;PPP2R1A;PLCG2;UBE2N;MAPK1;RIPK1;UBA52	20	162
R-HSA-354194	GRB2:SOS Provides Linkage To MAPK Signaling For Integrins	4/15	0.0237827	4.38311	16.3876	APBB1IP;RAP1B;ITGB3;FN1	4	15
R-HSA-9706369	Negative Regulation Of FLT3	4/15	0.0237827	4.38311	16.3876	SOCS2;FLT3;PTPRJ;UBA52	4	15
R-HSA-3134975	Regulation Of Innate Immune Responses To Cytosolic DNA	4/15	0.0237827	4.38311	16.3876	TBK1;IRF3;DTX4;UBA52	4	15
R-HSA-9648895	Response Of EIF2AK1 (HRI) To Heme Deficiency	4/15	0.0237827	4.38311	16.3876	CEBPG;ASNS;CHAC1;ATF4	4	15
R-HSA-372708	p130Cas Linkage To MAPK Signaling For Integrins	4/15	0.0237827	4.38311	16.3876	APBB1IP;RAP1B;ITGB3;FN1	4	15
R-HSA-9664323	FCGR3A-mediated IL10 Synthesis	7/38	0.0238361	2.72416	10.179	HCK;ADCY9;ADCY4;PLCG2;PRKX;PRKCA;ADCY6	7	38
R-HSA-8878171	Transcriptional Regulation By RUNX1	24/204	0.0240447	1.6135	6.01488	KMT2D;ACTL6B;CBX4;PRMT1;KMT2C;LIFR;LDB2;PHC3;SMARCA2;THBS1;PSMB8;CLDN5;PSMA3;CDK6;NR4A3;SIN3B;TAL1;PSMB3;PSME3;SCMH1;UBA52;SOCS4;TNRC6A;TNRC6B	24	204
R-HSA-983169	Class I MHC Mediated Antigen Processing And Presentation	40/378	0.0241673	1.43492	5.34186	DET1;NCF2;PIK3R4;UBE2D1;RNF6;UBE2J1;ASB16;SEC14L2;IKBKB;NPEPPS;SEC61A1;HERC3;RNF115;HECTD1;PSMB3;UBE2Q2;RNF217;FBXO6;ELOB;STX4;FBXO9;PDIA3;HSPA5;UBE2E3;UBE2G1;LMO7;BTBD6;FBXO10;PSMB8;PSMA3;HECW2;PSME3;ASB8;UBE2N;ASB7;CALR;UBA52;KBTBD8;ANAPC2;UBE2M	40	378
R-HSA-2022928	HS-GAG Biosynthesis	6/30	0.0243608	3.01521	11.2008	HS3ST3B1;GPC1;NDST4;HSPG2;HS2ST1;HS6ST3	6	30
R-HSA-418597	G Alpha (Z) Signaling Events	8/47	0.025336	2.47524	9.09782	ADCY9;ADCY4;GNAI3;GNB4;PRKCA;GNB5;ADCY6;ADRA2A	8	47
R-HSA-112043	PLC Beta Mediated Events	8/47	0.025336	2.47524	9.09782	CAMK2B;ADCY9;PDE1B;ADCY4;MAPK1;PRKX;PRKCA;ADCY6	8	47
R-HSA-3781865	Diseases Of Glycosylation	18/143	0.0257498	1.74091	6.37056	CTSA;EGFL7;ALG9;GALT;HEXB;GFPT1;HEXA;HSPG2;THBS1;THSD4;ADAMTS3;B4GAT1;CHSY1;ADAMTS1;GPC1;ADAMTS17;CSPG4;LARGE1	18	143
R-HSA-1640170	Cell Cycle	64/654	0.026432	1.31814	4.78904	MCM8;NCAPG2;UBE2D1;RSF1;BABAM1;BABAM2;XPO1;PPP2R1A;PPME1;CHEK1;RCC1;TK1;JAK2;CEP290;LBR;YWHAG;ZNF385A;CDK5RAP2;YWHAH;SUN2;DAXX;SUN1;ESCO1;RFC2;TUBB;PRKCA;TUBG2;RANGAP1;LEMD2;PSMA3;CLIP1;RAD51C;CCNE2;PSME3;MCM6;UBA52;ANAPC2;SDCCAG8;MCPH1;TUBGCP2;RRAD;VPS4A;RNF8;AAAS;NUP160;POLD4;PSMB3;POLD1;POLR2F;MAPK1;E2F3;POLR2H;CTC1;GINS1;HSPA2;TUBB4B;PSMB8;CDK6;CENPJ;MDM2;UBE2N;NCAPD3;CENPP;SPC24	64	654
R-HSA-9662834	CD163 Mediating An Anti-Inflammatory Response	3/9	0.0266781	6.02448	21.8322	CD163;PLK2;MYH9	3	9
R-HSA-2025928	Calcineurin Activates NFAT	3/9	0.0266781	6.02448	21.8322	PPP3CA;PPP3CB;PPP3R1	3	9
R-HSA-112411	MAPK1 (ERK2) Activation	3/9	0.0266781	6.02448	21.8322	MAPK1;JAK2;IL6R	3	9
R-HSA-1489509	DAG And IP3 Signaling	7/39	0.0271877	2.63889	9.51316	CAMK2B;ADCY9;PDE1B;ADCY4;PRKX;PRKCA;ADCY6	7	39
R-HSA-210500	Glutamate Neurotransmitter Release Cycle	5/23	0.027793	3.34913	11.9998	SNAP25;RAB3A;SLC1A1;CPLX1;SLC38A2	5	23
R-HSA-937041	IKK Complex Recruitment Mediated By RIP1	5/23	0.027793	3.34913	11.9998	IKBKB;UBE2N;UBE2D1;RIPK1;UBA52	5	23
R-HSA-8956321	Nucleotide Salvage	5/23	0.027793	3.34913	11.9998	UCK2;ADK;HPRT1;TK1;APRT	5	23
R-HSA-216083	Integrin Cell Surface Interactions	10/66	0.028233	2.15562	7.68967	ITGB1;ITGA4;ITGB3;ICAM2;KDR;FN1;HSPG2;THBS1;ITGA9;FBN1	10	66
R-HSA-69190	DNA Strand Elongation	6/31	0.0283061	2.89444	10.3178	GINS1;POLD4;MCM8;RFC2;POLD1;MCM6	6	31
R-HSA-167238	Pausing And Recovery Of Tat-mediated HIV Elongation	6/31	0.0283061	2.89444	10.3178	CDK9;SUPT4H1;POLR2F;ELOB;POLR2H;NELFE	6	31
R-HSA-9022692	Regulation Of MECP2 Expression And Activity	6/31	0.0283061	2.89444	10.3178	CAMK2B;NCOR2;PRKCA;LBR;TNRC6A;TNRC6B	6	31
R-HSA-199991	Membrane Trafficking	59/599	0.0286411	1.32688	4.71428	ITSN2;SCOC;C2CD5;RAB3A;TFRC;DENND1A;PRKAG1;FNBP1L;BICD2;SLC2A8;AP4M1;GOLGA4;KIF5C;AP1S2;TRAPPC12;MAN1A1;KIFAP3;YWHAG;YWHAH;TPD52;GABARAPL2;ACTR2;TRAPPC2L;AP1B1;VPS37D;ANK2;RAB33A;GJD2;ALS2;TBC1D4;TBC1D24;MYH9;PREB;UBA52;EXOC2;EXOC1;DCTN6;RAB5B;SPTBN5;VPS4A;CUX1;VPS52;AP2S1;TBC1D14;STX4;AP4S1;LDLR;KIAA0319;SPTBN1;TRAPPC3;SYT2;GALNT2;ARPC2;RAB14;KIF26B;KIF4A;COPS8;IL7R;MON1A	59	599
R-HSA-2142845	Hyaluronan Metabolism	4/16	0.0298293	4.01764	14.111	ABCC5;HEXB;HEXA;CHORDC1	4	16
R-HSA-164378	PKA Activation In Glucagon Signaling	4/16	0.0298293	4.01764	14.111	ADCY9;ADCY4;PRKCA;ADCY6	4	16
R-HSA-204174	Regulation Of Pyruvate Dehydrogenase (PDH) Complex	4/16	0.0298293	4.01764	14.111	PLPP6;PDK4;PDK3;DLAT	4	16
R-HSA-1660516	Synthesis Of PIPs At Early Endosome Membrane	4/16	0.0298293	4.01764	14.111	VAC14;MTMR12;PIK3R4;MTMR4	4	16
R-HSA-9010553	Regulation Of Expression Of SLITs And ROBOs	20/167	0.0313852	1.64505	5.69419	UPF2;USP33;RPL12;UPF3A;LDB2;RPL10A;PSMB8;RPS25;PSMA3;PSMB3;PSME3;COL4A5;RNPS1;ELOB;RPL22L1;RPL15;RPS10;RPL28;UBA52;RPL19	20	167
R-HSA-975871	MyD88 Cascade Initiated On Plasma Membrane	13/96	0.0316399	1.89166	6.53254	MAP2K4;JUN;MAP3K1;FOS;VRK3;TANK;IKBKB;MAPK9;MAPK11;PPP2R1A;UBE2N;MAPK1;UBA52	13	96
R-HSA-6791312	TP53 Regulates Transcription Of Cell Cycle Genes	8/49	0.0317704	2.35424	8.1203	BTG2;RGCC;CCNE2;PRMT1;GADD45A;PLK2;CENPJ;ZNF385A	8	49
R-HSA-168138	Toll Like Receptor 9 (TLR9) Cascade	14/106	0.0319336	1.83819	6.33092	MAP2K4;JUN;MAP3K1;PIK3R4;FOS;VRK3;TANK;IKBKB;MAPK9;MAPK11;PPP2R1A;UBE2N;MAPK1;UBA52	14	106
R-HSA-168255	Influenza Infection	19/157	0.0321309	1.66443	5.72222	CPSF4;PARP1;RPL12;RPL10A;AAAS;NUP160;DNAJC3;RPS25;XPO1;PABPN1;POLR2F;RPL22L1;CALR;POLR2H;RPL15;RPS10;RPL28;UBA52;RPL19	19	157
R-HSA-70263	Gluconeogenesis	6/32	0.0326499	2.78297	9.52307	G6PC3;GNPDA1;MDH1;GOT2;PGK1;ALDOB	6	32
R-HSA-180024	DARPP-32 Events	5/24	0.0329547	3.17269	10.8272	PPP3CA;PPP3CB;PPP3R1;PPP2R1A;PRKCA	5	24
R-HSA-5668599	RHO GTPases Activate NADPH Oxidases	5/24	0.0329547	3.17269	10.8272	MAPK11;NCF2;PIK3R4;MAPK1;PRKCA	5	24
R-HSA-5362517	Signaling By Retinoic Acid	7/41	0.0348195	2.48339	8.33817	ALDH1A3;RARG;PDK4;PDK3;RDH14;DLAT;RXRG	7	41
R-HSA-445717	Aquaporin-mediated Transport	8/50	0.0353716	2.29806	7.67977	ADCY9;MYO5B;ADCY4;GNB4;PRKCA;GNB5;RAB11FIP2;ADCY6	8	50
R-HSA-112310	Neurotransmitter Release Cycle	8/50	0.0353716	2.29806	7.67977	SNAP25;RAB3A;DNAJC5;GAD1;SH2D3C;SLC1A1;CPLX1;SLC38A2	8	50
R-HSA-399997	Acetylcholine Regulates Insulin Secretion	3/10	0.0359765	5.16356	17.1683	CHRM3;MARCKS;PRKCA	3	10
R-HSA-9634285	Constitutive Signaling By Overexpressed ERBB2	3/10	0.0359765	5.16356	17.1683	CDC37;ERBB2;PTPN12	3	10
R-HSA-168799	Neurotoxicity Of Clostridium Toxins	3/10	0.0359765	5.16356	17.1683	SNAP25;SYT2;VAMP1	3	10
R-HSA-450531	Regulation Of mRNA Stability By Proteins That Bind AU-rich Elements	12/88	0.0362317	1.90645	6.32526	MAPK11;PSMA3;XPO1;PSMB3;KHSRP;PSME3;PARN;HSPB1;PRKCA;UBA52;PSMB8;ZFP36L1	12	88
R-HSA-264642	Acetylcholine Neurotransmitter Release Cycle	4/17	0.0367011	3.70839	12.256	SNAP25;RAB3A;SH2D3C;CPLX1	4	17
R-HSA-936964	Activation Of IRF3/IRF7 Mediated By TBK1/IKK Epsilon	4/17	0.0367011	3.70839	12.256	TBK1;IRF3;TANK;UBA52	4	17
R-HSA-8874081	MET Activates PTK2 Signaling	4/17	0.0367011	3.70839	12.256	ITGB1;LAMC3;RNMT;LAMB1	4	17
R-HSA-163615	PKA Activation	4/17	0.0367011	3.70839	12.256	ADCY9;ADCY4;PRKCA;ADCY6	4	17
R-HSA-167172	Transcription Of HIV Genome	10/69	0.0370543	2.04568	6.74127	CDK9;RNGTT;RNMT;SUPT4H1;POLR2F;ELOB;GTF2H1;POLR2H;TAF9B;NELFE	10	69
R-HSA-167287	HIV Elongation Arrest And Recovery	6/33	0.0374039	2.67975	8.8056	CDK9;SUPT4H1;POLR2F;ELOB;POLR2H;NELFE	6	33
R-HSA-6802948	Signaling By High-Kinase Activity BRAF Mutants	6/33	0.0374039	2.67975	8.8056	RAP1B;APBB1IP;ITGB3;FN1;MAPK1;IQGAP1	6	33
R-HSA-390522	Striated Muscle Contraction	6/33	0.0374039	2.67975	8.8056	TPM4;ACTN2;TNNT2;TMOD2;TCAP;NEB	6	33
R-HSA-73887	Death Receptor Signaling	17/139	0.0376368	1.68379	5.52244	ARHGEF33;TRIO;PRDM4;ARHGEF26;USP2;OMG;CFLAR;TANK;RTN4;IKBKB;CYLD;AKAP13;ARHGEF9;RACK1;ARHGEF3;RIPK1;UBA52	17	139
R-HSA-9705462	Inactivation Of CSF3 (G-CSF) Signaling	5/25	0.0386742	3.01389	9.80292	HCK;UBE2D1;ELOB;JAK2;UBA52	5	25
R-HSA-2426168	Activation Of Gene Expression By SREBF (SREBP)	7/42	0.0391182	2.4123	7.81868	HELZ2;FDPS;SQLE;NFYB;PMVK;CYP51A1;HMGCR	7	42
R-HSA-381676	Glucagon-like Peptide-1 (GLP1) Regulates Insulin Secretion	7/42	0.0391182	2.4123	7.81868	KCNG2;KCNC2;GNB4;PRKCA;IQGAP1;GNB5;ADCY6	7	42
R-HSA-5668914	Diseases Of Metabolism	27/247	0.0399306	1.48485	4.78214	MTRR;GALT;GBE1;HEXB;HEXA;THBS1;THSD4;ADAMTS3;CHSY1;ADAMTS1;GPC1;ADAMTS17;LARGE1;CTSA;EGFL7;ALG9;GFPT1;HSPG2;APRT;GCLC;G6PC3;B4GAT1;CSPG4;HPRT1;ALDOB;UBA52;MMACHC	27	247
R-HSA-380320	Recruitment Of NuMA To Mitotic Centrosomes	11/80	0.0415213	1.92434	6.12238	PPP2R1A;TUBGCP2;TUBB;CENPJ;PRKCA;TUBG2;TUBB4B;CEP290;YWHAG;CDK5RAP2;SDCCAG8	11	80
R-HSA-1474290	Collagen Formation	12/90	0.0420639	1.85737	5.88519	CRTAP;ADAMTS3;P4HA1;COL5A3;COL5A2;SERPINH1;COL4A5;COL8A1;PLOD2;TLL1;P3H3;P4HB	12	90
R-HSA-8943724	Regulation Of PTEN Gene Transcription	9/61	0.0421248	2.08838	6.61414	SUZ12;HDAC5;JUN;REST;CBX4;SCMH1;MAPK1;PHC3;HDAC7	9	61
R-HSA-5621481	C-type Lectin Receptors (CLRs)	17/141	0.042261	1.65645	5.24083	ICAM2;UBE2D1;PRKCA;PSMB8;IKBKB;PPP3CA;PPP3R1;PPP3CB;PSMA3;PSMB3;PSME3;PLCG2;UBE2N;PKN2;UBA52;MAP3K14;UBE2M	17	141
R-HSA-167200	Formation Of HIV-1 Elongation Complex Containing HIV-1 Tat	7/43	0.0437495	2.34517	7.33868	CDK9;SUPT4H1;POLR2F;ELOB;GTF2H1;POLR2H;NELFE	7	43
R-HSA-9037629	Lewis Blood Group Biosynthesis	4/18	0.0444061	3.44331	10.7238	FUT11;B3GALT4;ST3GAL4;FUT2	4	18
R-HSA-1280218	Adaptive Immune System	69/733	0.0447812	1.2618	3.91912	ITGB1;PRR5;DET1;NCF2;ICAM2;UBE2D1;PTPRJ;IKBKB;NPEPPS;PPP3CA;SEC61A1;RNF115;HERC3;PPP3CB;PPP2R1A;KIF5C;UBE2Q2;AP1S2;CTSH;ELOB;FBXO6;KIFAP3;CTSD;FBXO9;PDIA3;CXADR;ITGA4;UBE2E3;AP1B1;PRKCA;LMO7;FBXO10;PSMA3;HECW2;PSME3;UBA52;ANAPC2;DCTN6;CD274;PIK3R4;RNF6;PIK3R1;PRICKLE1;RASGRP2;UBE2J1;ASB16;RAP1B;SEC14L2;PPP3R1;HECTD1;PSMB3;RNF217;PLCG2;AP2S1;STX4;CTSA;HSPA5;UBE2G1;BTBD6;PSMB8;KIF4A;ASB8;UBE2N;ASB7…	69	733
R-HSA-380287	Centrosome Maturation	11/81	0.0448537	1.89675	5.88817	PPP2R1A;TUBGCP2;TUBB;CENPJ;PRKCA;TUBG2;TUBB4B;CEP290;YWHAG;CDK5RAP2;SDCCAG8	11	81
R-HSA-168928	DDX58/IFIH1-mediated Induction Of Interferon-Alpha/Beta	11/81	0.0448537	1.89675	5.88817	IKBKB;TOMM70;CYLD;TBK1;MAP3K1;IRF3;UBE2D1;TRIM25;RIPK1;UBA52;TANK	11	81
R-HSA-901042	Calnexin/calreticulin Cycle	5/26	0.0449616	2.87021	8.90325	PDIA3;SEL1L;CALR;RNF185;UBA52	5	26
R-HSA-6803529	FGFR2 Alternative Splicing	5/26	0.0449616	2.87021	8.90325	TIAL1;PTBP1;RBFOX2;POLR2F;POLR2H	5	26
R-HSA-975138	TRAF6 Mediated Induction Of NFkB And MAP Kinases Upon TLR7/8 Or 9 Activation	13/101	0.045128	1.7837	5.52634	MAP2K4;JUN;MAP3K1;FOS;VRK3;TANK;IKBKB;MAPK9;MAPK11;PPP2R1A;UBE2N;MAPK1;UBA52	13	101
R-HSA-9711097	Cellular Response To Starvation	18/153	0.0459386	1.61107	4.96283	ATP6V1G1;ATP6V0B;RPL12;CEBPG;ASNS;RPL10A;RPS25;BMT2;SESN2;RPL22L1;RPL15;ATP6V1E1;RPS10;RPL28;UBA52;ATP6V1D;ATF4;RPL19	18	153
R-HSA-8957322	Metabolism Of Steroids	18/153	0.0459386	1.61107	4.96283	FDPS;STARD4;STARD3NL;INSIG2;NFYB;OSBPL3;OSBPL2;CYP51A1;AKR1B1;DHCR24;HMGCR;HELZ2;HSD11B1;PLPP6;SQLE;PMVK;SUMO2;LBR	18	153
R-HSA-6802952	Signaling By BRAF And RAF1 Fusions	9/62	0.0460616	2.04886	6.30594	APBB1IP;CAMK2B;RAP1B;MPRIP;ITGB3;FN1;MAPK1;IQGAP1;JAK2	9	62
R-HSA-397014	Muscle Contraction	22/196	0.0465051	1.52852	4.6898	KCNH2;CAMK2B;KCNK10;KCND2;TPM4;KCNIP1;ACTN2;TMOD2;ATP2A3;PRKCA;KCNA5;NEB;MYL12B;NPPC;CALD1;TNNT2;SCN8A;TCAP;PKN2;SCN5A;FGF12;SCN1B	22	196
R-HSA-5218900	CASP8 Activity Is Inhibited	3/11	0.0467086	4.51787	13.842	RIPK1;CFLAR;TANK	3	11
R-HSA-5607763	CLEC7A (Dectin-1) Induces NFAT Activation	3/11	0.0467086	4.51787	13.842	PPP3CA;PPP3CB;PPP3R1	3	11
R-HSA-69416	Dimerization Of Procaspase-8	3/11	0.0467086	4.51787	13.842	RIPK1;CFLAR;TANK	3	11
R-HSA-9754560	SARS-CoV-2 Modulates Autophagy	3/11	0.0467086	4.51787	13.842	UVRAG;VPS41;VPS11	3	11
R-HSA-176974	Unwinding Of DNA	3/11	0.0467086	4.51787	13.842	GINS1;MCM8;MCM6	3	11
R-HSA-975957	Nonsense Mediated Decay (NMD) Enhanced By Exon Junction Complex (EJC)	14/112	0.0476492	1.72509	5.25097	UPF2;SMG1;RPL12;UPF3A;RPL10A;RPS25;PPP2R1A;RNPS1;RPL22L1;RPL15;RPS10;RPL28;UBA52;RPL19	14	112
R-HSA-936440	Negative Regulators Of DDX58/IFIH1 Signaling	6/35	0.0481792	2.49467	7.56589	CYLD;TBK1;IRF3;UBE2D1;TRIM25;UBA52	6	35
R-HSA-165054	Rev-mediated Nuclear Export Of HIV RNA	6/35	0.0481792	2.49467	7.56589	RANBP1;XPO1;RCC1;AAAS;RANGAP1;NUP160	6	35
R-HSA-975155	MyD88 Dependent Cascade Initiated On Endosome	13/102	0.0482425	1.76356	5.34625	MAP2K4;JUN;MAP3K1;FOS;VRK3;TANK;IKBKB;MAPK9;MAPK11;PPP2R1A;UBE2N;MAPK1;UBA52	13	102
R-HSA-194138	Signaling By VEGF	13/102	0.0482425	1.76356	5.34625	PRR5;FLT1;NCF2;ITGB3;HSPB1;PRKCA;PIK3R1;CDH5;MAPK11;ABI1;KDR;PTK2B;PKN2	13	102

## Sheet: pathway.MDD
ID	Term	Gene.ratio	P.value	Odds.Ratio	Combined.Score	Genes	Overlap	Term.genes
R-HSA-379716	Cytosolic tRNA Aminoacylation	12/24	3.11049e-08	12.5707	217.295	AARS1;HARS1;SARS1;NARS1;PPA1;IARS1;YARS1;CARS1;EEF1E1;FARSA;WARS1;FARSB	12	24
R-HSA-1852241	Organelle Biogenesis And Maintenance	47/275	6.16963e-08	2.62345	43.552	DYNC2I1;TTC26;ALAS1;SMARCD3;C2CD3;DCTN2;ARL6;ARL3;ATP5MC3;MICOS13;NRF1;HDAC6;TTBK2;IFT74;ACTR1A;ATP5F1A;ATP5F1B;KIF3B;ARL13B;KIF3A;CNTRL;TCTN1;NPHP1;BBS9;NPHP4;KIFAP3;CCT5;DYNC2H1;OFD1;CREBBP;ATP5PD;IFT140;ATP5PB;MTX2;ODF2;TUBB;KIF24;IFT122;MAPK14;ATP5F1D;SSTR3;TUBA4A;AHI1;ATP5PO;CEP162;CEP89;PAFAH1B1	47	275
R-HSA-162582	Signal Transduction	248/2465	1.73562e-07	1.47512	22.9629	CPNE8;TRRAP;STMN2;CCNC;SPINT2;RXFP1;BAIAP2L1;AKT2;PSMD3;PDK4;PDK3;VPS35;ATP6V1E1;SOX6;PRKACB;WLS;DYNC2H1;ATP6V1G1;OMG;GABRG2;SRRM1;DYNC1LI1;RRAGA;DDX39B;PRKAR1B;WDR81;RRAGC;PSME3;PSME4;NUP98;TRIB1;ATP6V0D1;INTU;IQGAP2;MTMR4;NLN;RDH11;FLRT3;ATP6V1C1;JUN;CREBBP;EGR2;JUP;EGR4;FZD7;NFATC1;STAM;CCT6A;MOV10;PPP5C;AGO2;DZIP1;RET;GABRB2;CLTC;CLTB;PTPRJ;EFCAB7;GLI3;ARHGAP4;SMPD2;AKAP13;SHH;PPP3CB;PEA15;RS…	248	2465
R-HSA-8856688	Golgi-to-ER Retrograde Transport	25/112	5.22618e-07	3.62967	52.5011	RAB1A;DCTN2;KLC1;NAPG;KLC4;ACTR1A;KIF3B;KIF3A;KIFAP3;RAB6A;DYNC1I1;NSF;KIF23;COPZ1;DYNC1LI1;KIF18A;KIF9;CAPZA2;COPG1;ACTR10;COPE;ARF5;PAFAH1B2;RAB3GAP1;PAFAH1B1	25	112
R-HSA-70326	Glucose Metabolism	21/89	1.60715e-06	3.89417	51.9524	NDC1;NUP214;TPI1;MDH1;MDH2;GOT2;PPP2R5D;ENO2;NUP160;PPP2CA;PCNX4;PKM;GNPDA1;PGK1;NUP98;SLC37A4;SLC25A12;PRKACB;SLC25A11;PFKM;PFKP	21	89
R-HSA-5358351	Signaling By Hedgehog	27/135	1.85338e-06	3.15854	41.688	PSMD12;INTU;PSMD14;EFCAB7;GLI3;ADCY5;ERLEC1;SHH;PSMB4;PSMB5;KIF3A;PSMD3;BOC;PRKACB;DYNC2H1;OFD1;SMURF2;IFT140;IFT122;PRKAR1B;PSMA1;PSMC4;PSME3;PSME4;NUMB;GAS1;DZIP1	27	135
R-HSA-5617833	Cilium Assembly	33/186	2.37744e-06	2.7296	35.3469	DYNC2I1;TTC26;C2CD3;DCTN2;ARL6;ARL3;HDAC6;TTBK2;IFT74;ACTR1A;KIF3B;ARL13B;KIF3A;NPHP1;CNTRL;TCTN1;BBS9;NPHP4;KIFAP3;CCT5;DYNC2H1;OFD1;ODF2;IFT140;TUBB;IFT122;KIF24;SSTR3;TUBA4A;AHI1;CEP162;CEP89;PAFAH1B1	33	186
R-HSA-1428517	Citric Acid (TCA) Cycle And Respiratory Electron Transport	30/163	3.11621e-06	2.85182	36.1579	NDUFB9;NDUFA12;NDUFB5;ATP5MC3;UQCR11;ECSIT;LDHA;ATP5F1A;ATP5F1B;MPC2;PDK4;PDK3;COX14;IDH3A;ATP5PD;ATP5PB;MDH2;NDUFC2;COQ10B;ATP5F1D;COX6B1;SUCLA2;NDUFAF7;UQCRC1;ATP5PO;VDAC1;TMEM126B;UQCRC2;NDUFAF1;HAGH	30	163
R-HSA-1268020	Mitochondrial Protein Import	17/65	3.47561e-06	4.45859	56.0433	TOMM70;DNAJC19;MTX2;TIMM9;TIMM13;TIMM23;TOMM20;ATP5F1A;ATP5F1B;GRPEL1;PITRM1;GRPEL2;TIMM17A;PMPCB;VDAC1;SLC25A12;SLC25A4	17	65
R-HSA-70263	Gluconeogenesis	11/32	1.08529e-05	6.57696	75.1817	PCNX4;TPI1;GNPDA1;MDH1;MDH2;GOT2;PGK1;ENO2;SLC37A4;SLC25A12;SLC25A11	11	32
R-HSA-392499	Metabolism Of Proteins	187/1890	2.00268e-05	1.42342	15.3992	ERO1A;EIF4A2;DPAGT1;RAB3C;RPL3;RAB3A;CMAS;TRRAP;SMC5;SMC6;APEH;YARS1;DCAF5;TOMM20;PCMT1;LGALS1;NARS1;TUBB3;PSMD3;EP300;FBXO9;FBXW4;NUP214;RAB2A;NSF;IGFBP5;USP5;EIF1AX;FBXW11;FBXO17;ALG14;SHISA5;ALG13;ANK1;TUBA4A;KLHL42;DYNC1LI1;RRAGA;PPA1;CCNE1;RAB37;PSME3;PSME4;MXRA8;UBE2V2;FKBP8;VDAC2;VDAC1;NUP98;CARS1;RPL28;GPLD1;AARS1;DDX5;PSMD12;ENPEP;RAB5B;INO80D;PSMD14;CUL2;EIF5A2;KLHL11;DCUN1D2;MRPL14;COP…	187	1890
R-HSA-2132295	MHC Class II Antigen Presentation	21/104	2.15316e-05	3.18781	34.2562	SEC23A;DCTN2;CLTC;KIF23;PRICKLE1;KLC1;DYNC1LI1;KLC4;KIF18A;ACTR1A;ACTR1B;KIF3B;KIF3A;CAPZA2;AP2S1;CTSF;KIFAP3;ACTR10;AP2M1;DYNC1I1;LGMN	21	104
R-HSA-5610787	Hedgehog Off State	20/98	2.85327e-05	3.2293	33.7929	DYNC2H1;OFD1;PSMD12;INTU;PSMD14;IFT140;IFT122;GLI3;ADCY5;PSMB4;PSMB5;PRKAR1B;PSMA1;KIF3A;PSMC4;PSME3;PSMD3;PSME4;NUMB;PRKACB	20	98
R-HSA-195721	Signaling By WNT	42/294	3.22208e-05	2.11096	21.8334	KMT2D;PSMD12;PSMD14;TRRAP;CLTC;CLTB;KLHL12;PRICKLE1;PPP2CA;PPP3CB;PSMB4;PSMB5;PARD6A;AKT2;PSMD3;RSPO2;AP2S1;EP300;VPS35;SOX6;AP2M1;WLS;BCL9L;H2AZ1;CREBBP;SMURF2;FZD7;PPP2R5B;NFATC1;PPP2R5D;WNT9A;RNF146;TNRC6C;MOV10;PSMA1;PSMC4;PSME3;PSME4;AGO2;PLCB1;LGR6;TNRC6B	42	294
R-HSA-379724	tRNA Aminoacylation	12/42	3.62438e-05	5.02337	51.3652	AARS1;HARS1;SARS1;NARS1;PPA1;IARS1;YARS1;CARS1;EEF1E1;FARSA;WARS1;FARSB	12	42
R-HSA-9006934	Signaling By Receptor Tyrosine Kinases	62/496	3.63966e-05	1.81656	18.5671	GABRB2;CLTC;IRS2;PTPRJ;SPINT2;LAMC1;IGF1R;PTBP1;SPRED1;FGF9;AKT2;EP300;ATP6V1E1;PRKACB;JAK3;HRAS;AP2M1;DUSP4;ATP6V1G1;ATP6V0B;ATP6AP1;PPP2R5D;EPS15L1;GABRG2;DUSP7;COL4A1;PXDN;ATP6V1B2;ATP6V0D1;TRIB1;SGK1;ATP6V1A;RNMT;ROCK2;CXXC1;STK4;THBS3;PPP2CA;GGA3;FLRT3;POLR2B;POLR2C;AP2S1;CSK;POLR2H;SH2B3;EPS15;ATP6V1D;ATP6V1C1;GABRA1;WWOX;PTPN18;EGR2;JUP;EGR4;VEGFC;STAM;MAPK14;RIT2;FOSB;PKN2;FGFR1	62	496
R-HSA-5632684	Hedgehog On State	18/85	4.21772e-05	3.38093	34.0583	PSMD12;PSMD14;SMURF2;EFCAB7;GLI3;SHH;PSMB4;PSMB5;PSMA1;KIF3A;PSMC4;PSME3;BOC;PSMD3;PSME4;NUMB;GAS1;DZIP1	18	85
R-HSA-1430728	Metabolism	198/2049	4.63812e-05	1.38619	13.8323	RPL3;CERK;GDE1;CCNC;ENO2;HS6ST3;PSMD3;PDK4;PDK3;CHAC1;PRKACB;NUP214;CUBN;STARD4;ACOT8;ACOT7;SACM1L;ENTPD6;HOGA1;ACSL3;PRKAR1B;PPA1;PSME3;PSME4;RBP1;UQCRC1;VDAC2;VDAC1;TMEM126B;FAR2;UQCRC2;NUP98;RPL28;GCDH;LIPT1;RTEL1;SLC35D1;MTMR9;MTMR4;MTMR6;MTMR7;HSD11B1;PCNX4;NEU3;UGCG;LDHA;RDH11;ARSK;RIMKLA;HMGCLL1;CREBBP;CHKA;MED13L;B4GAT1;NDUFAF7;PPT1;NDUFAF1;LGMN;MOCS3;ECSIT;OSBPL10;MED12;SMPD2;MED14;SMPD4…	198	2049
R-HSA-77387	Insulin Receptor Recycling	9/26	6.52108e-05	6.63972	63.9929	ATP6V1A;ATP6V0B;ATP6V1G1;ATP6AP1;ATP6V1B2;ATP6V1E1;ATP6V0D1;ATP6V1D;ATP6V1C1	9	26
R-HSA-163200	Respiratory Electron Transport, ATP Synthesis By Chemiosmotic Coupling, Heat Production By Uncoupling Proteins	21/112	6.80381e-05	2.9063	27.8873	NDUFB9;ATP5PD;NDUFA12;NDUFB5;ATP5PB;ATP5MC3;NDUFC2;UQCR11;ECSIT;COQ10B;ATP5F1D;COX6B1;ATP5F1A;ATP5F1B;NDUFAF7;UQCRC1;ATP5PO;COX14;TMEM126B;UQCRC2;NDUFAF1	21	112
R-HSA-163210	Formation Of ATP By Chemiosmotic Coupling	7/16	7.68262e-05	9.74566	92.33	ATP5F1A;ATP5PD;ATP5F1B;ATP5PB;ATP5PO;ATP5MC3;ATP5F1D	7	16
R-HSA-5389840	Mitochondrial Translation Elongation	17/82	9.04012e-05	3.28947	30.629	GADD45GIP1;TSFM;MRPS16;MRPS11;MRPS33;MRPS23;MRPS10;MRPS21;MRPL14;MRPL37;MRPL15;MRPL10;MRPL21;MRPL33;MRPL44;MRPL3;MRPL1	17	82
R-HSA-5687128	MAPK6/MAPK4 Signaling	18/90	9.29419e-05	3.14529	29.1994	PSMD12;JUN;PSMD14;CDC14A;TNRC6C;MOV10;PSMB4;PSMB5;PSMA1;PSMC4;PSME3;PSMD3;CDC42EP3;PSME4;AGO2;PKN2;PRKACB;TNRC6B	18	90
R-HSA-3858494	Beta-catenin Independent WNT Signaling	24/142	0.000119582	2.56299	23.1477	PSMD12;PSMD14;SMURF2;FZD7;CLTC;CLTB;NFATC1;PRICKLE1;TNRC6C;MOV10;PPP3CB;PSMB4;PARD6A;PSMB5;PSMA1;PSMC4;PSME3;PSMD3;PSME4;AGO2;AP2S1;PLCB1;AP2M1;TNRC6B	24	142
R-HSA-6811436	COPI-independent Golgi-to-ER Retrograde Traffic	10/34	0.000123439	5.22727	47.0442	DYNC1LI1;ACTR1A;DCTN2;CAPZA2;RAB6A;ACTR10;DYNC1I1;PAFAH1B2;RAB3GAP1;PAFAH1B1	10	34
R-HSA-9639288	Amino Acids Regulate mTORC1	13/55	0.000149597	3.88725	34.2372	ATP6V1A;ATP6V0B;ATP6V1G1;WDR59;RRAGA;RRAGC;SESN2;ATP6V1B2;ATP6V1E1;ATP6V0D1;ATP6V1D;LAMTOR3;ATP6V1C1	13	55
R-HSA-8949613	Cristae Formation	9/29	0.00017057	5.64285	48.9594	ATP5F1A;ATP5F1B;ATP5PD;ATP5PB;MTX2;ATP5PO;ATP5MC3;MICOS13;ATP5F1D	9	29
R-HSA-597592	Post-translational Protein Modification	138/1383	0.000182053	1.42227	12.2475	DPAGT1;RAB3C;RAB3A;CMAS;TRRAP;SMC5;SMC6;DCAF5;TOMM20;LGALS1;TUBB3;PSMD3;EP300;FBXO9;FBXW4;NUP214;RAB2A;NSF;IGFBP5;USP5;FBXW11;FBXO17;ALG14;SHISA5;ALG13;ANK1;KLHL42;DYNC1LI1;RRAGA;RAB37;PSME3;PSME4;MXRA8;UBE2V2;FKBP8;VDAC2;VDAC1;NUP98;GPLD1;DDX5;PSMD12;RAB5B;INO80D;PSMD14;CUL2;EIF5A2;KLHL11;DCUN1D2;COPS7A;THY1;NUP160;NEU3;VCPIP1;COMMD9;DPH1;ARSK;NAE1;RAB6A;MPDU1;TRAPPC3;HSPA8;CREBBP;TRAPPC1;CBX4;S…	138	1383
R-HSA-5368287	Mitochondrial Translation	17/88	0.000223972	3.0105	25.3002	GADD45GIP1;TSFM;MRPS16;MRPS11;MRPS33;MRPS23;MRPS10;MRPS21;MRPL14;MRPL37;MRPL15;MRPL10;MRPL21;MRPL33;MRPL44;MRPL3;MRPL1	17	88
R-HSA-4086400	PCP/CE Pathway	17/88	0.000223972	3.0105	25.3002	PSMD12;PSMD14;SMURF2;FZD7;CLTC;CLTB;PRICKLE1;PSMB4;PARD6A;PSMB5;PSMA1;PSMC4;PSME3;PSMD3;PSME4;AP2S1;AP2M1	17	88
R-HSA-157118	Signaling By NOTCH	30/203	0.000226309	2.18767	18.3624	PSMD12;B4GALT1;PSMD14;WWC1;CCNC;DTX4;HDAC8;DLL1;HDAC6;PSMB4;PSMB5;PSMD3;EP300;RAB6A;H2AZ1;CREBBP;JUN;WWP2;NCOR2;TNRC6C;MOV10;PSMA1;PSMC4;PSME3;FABP7;AGO2;CNTN1;NUMB;MAMLD1;TNRC6B	30	203
R-HSA-5628897	TP53 Regulates Metabolic Genes	16/81	0.000260009	3.09386	25.5392	UBL4A;TIGAR;COX6B1;TNRC6C;PRDX2;MOV10;RRAGA;GNPDA1;RRAGC;RRM2B;AKT2;SESN2;AGO2;COX14;LAMTOR3;TNRC6B	16	81
R-HSA-917977	Transferrin Endocytosis And Recycling	9/31	0.000299928	5.12931	41.6088	ATP6V1A;ATP6V0B;ATP6V1G1;ATP6AP1;ATP6V1B2;ATP6V1E1;ATP6V0D1;ATP6V1D;ATP6V1C1	9	31
R-HSA-5368286	Mitochondrial Translation Initiation	16/82	0.000301126	3.04682	24.7035	GADD45GIP1;MRPS16;MRPS11;MRPS33;MRPS23;MRPS10;MRPS21;MRPL14;MRPL37;MRPL15;MRPL10;MRPL21;MRPL33;MRPL44;MRPL3;MRPL1	16	82
R-HSA-5419276	Mitochondrial Translation Termination	16/82	0.000301126	3.04682	24.7035	GADD45GIP1;MRPS16;MRPS11;MRPS33;MRPS23;MRPS10;MRPS21;MRPL14;MRPL37;MRPL15;MRPL10;MRPL21;MRPL33;MRPL44;MRPL3;MRPL1	16	82
R-HSA-2262752	Cellular Responses To Stress	79/722	0.000319043	1.56292	12.5818	ERO1A;RPL3;MRE11;EHMT1;LIMD1;ACTR1A;SERP1;AKT2;PSMD3;SESN2;EP300;CHAC1;ATP6V1E1;NUP214;NDC1;KDM6B;MAP2K4;ATP6V1G1;ATP6V0B;ANAPC7;PPP2R5B;COX6B1;NCOR2;DYNC1LI1;RRAGA;PSMA1;RRAGC;CCNE1;PSME3;PSME4;ATP6V1B2;BLVRB;NUP98;ATP6V0D1;RPL28;BLVRA;ATF4;ATP6V1A;PSMD12;SMARCD3;PSMD14;DCTN2;CUL2;CXXC1;HSPA13;HDAC6;NUP160;PRDX2;EXTL2;PSMB4;PSMB5;LMNA;DNAJB9;COX14;ATP6V1D;CAMK2G;ATP6V1C1;DYNC1I1;H2AZ1;UBL4A;HSPA…	79	722
R-HSA-5683057	MAPK Family Signaling Cascades	41/318	0.000381435	1.87085	14.7265	RET;PSMD12;PSMD14;RNMT;RASGRF1;IRS2;CDC14A;PPP2CA;PSMB4;SPRED1;PSMB5;FGF9;PSMD3;PEA15;NEFL;CSK;PRKACB;HRAS;JAK3;CAMK2G;DUSP4;DUSP5;JUN;PPP2R5B;PPP2R5D;GFRA2;DUSP7;TNRC6C;MOV10;PPP5C;PSMA1;PSMC4;PSME3;PSME4;AGO2;CDC42EP3;PKN2;LAMTOR3;BCL2L1;FGFR1;TNRC6B	41	318
R-HSA-6811442	Intra-Golgi And Retrograde Golgi-to-ER Traffic	27/181	0.000391153	2.20955	17.337	RAB1A;DCTN2;KLC1;NAPG;KLC4;ACTR1A;KIF3B;KIF3A;ARFIP2;VPS54;KIFAP3;RAB6A;DYNC1I1;NSF;KIF23;COPZ1;DYNC1LI1;KIF18A;KIF9;CAPZA2;COPG1;ACTR10;COPE;ARF5;PAFAH1B2;RAB3GAP1;PAFAH1B1	27	181
R-HSA-9013420	RHOU GTPase Cycle	10/39	0.000425555	4.32485	33.57	GIT2;ARHGAP31;PARD6A;PEAK1;DLG5;CLTC;WDR6;WWP2;PKN2;STAM	10	39
R-HSA-70171	Glycolysis	14/69	0.000464977	3.19671	24.53	NDC1;NUP214;TPI1;PPP2R5D;ENO2;NUP160;PPP2CA;PKM;GNPDA1;PGK1;NUP98;PRKACB;PFKM;PFKP	14	69
R-HSA-69278	Cell Cycle, Mitotic	60/523	0.000500183	1.64289	12.4869	CCNH;CDC14A;NIPBL;ACTR1A;TUBB3;PPME1;AKT2;PSMD3;CNTRL;EP300;POLE;NUP214;NDC1;OFD1;RAB2A;ANAPC7;RFC2;FBXW11;TUBB;PPP2R5B;KIF23;PPP2R5D;RANGAP1;TUBA4A;DYNC1LI1;CLIP1;TUBB2A;PSMA1;NME7;CCNE1;PSME3;PSME4;NUP98;MCM6;OPTN;MAD1L1;ITGB3BP;PAFAH1B1;RAB1A;PRIM2;PSMD12;PSMD14;DCTN2;HDAC8;NUP160;ORC5;PPP2CA;PSMB4;PSMB5;LMNA;DYNC1I1;H2AZ1;CDKN2C;ODF2;CDC7;KIF18A;WEE1;PSMC4;POLE3;PPP2R2D	60	523
R-HSA-4608870	Asymmetric Localization Of PCP Proteins	13/62	0.000526831	3.33066	25.142	PSMD12;PSMD14;SMURF2;FZD7;PRICKLE1;PSMB4;PARD6A;PSMB5;PSMA1;PSMC4;PSME3;PSMD3;PSME4	13	62
R-HSA-6811434	COPI-dependent Golgi-to-ER Retrograde Traffic	15/78	0.000540647	2.99086	22.4995	NSF;RAB1A;KIF23;KLC1;COPZ1;NAPG;KLC4;KIF9;KIF18A;KIF3B;KIF3A;COPG1;KIFAP3;ARF5;COPE	15	78
R-HSA-8953897	Cellular Responses To Stimuli	79/736	0.000569951	1.52842	11.4172	ERO1A;RPL3;MRE11;EHMT1;LIMD1;ACTR1A;SERP1;AKT2;PSMD3;SESN2;EP300;CHAC1;ATP6V1E1;NUP214;NDC1;KDM6B;MAP2K4;ATP6V1G1;ATP6V0B;ANAPC7;PPP2R5B;COX6B1;NCOR2;DYNC1LI1;RRAGA;PSMA1;RRAGC;CCNE1;PSME3;PSME4;ATP6V1B2;BLVRB;NUP98;ATP6V0D1;RPL28;BLVRA;ATF4;ATP6V1A;PSMD12;SMARCD3;PSMD14;DCTN2;CUL2;CXXC1;HSPA13;HDAC6;NUP160;PRDX2;EXTL2;PSMB4;PSMB5;LMNA;DNAJB9;COX14;ATP6V1D;CAMK2G;ATP6V1C1;DYNC1I1;H2AZ1;UBL4A;HSPA…	79	736
R-HSA-5620912	Anchoring Of Basal Body To Plasma Membrane	17/97	0.000732571	2.67052	19.2783	OFD1;C2CD3;DCTN2;ODF2;TUBB;KIF24;TUBA4A;TTBK2;AHI1;ACTR1A;NPHP1;CNTRL;TCTN1;CEP162;NPHP4;CEP89;PAFAH1B1	17	97
R-HSA-5205685	PINK1-PRKN Mediated Mitophagy	7/22	0.00077113	5.8455	41.8985	PRKN;TOMM70;PINK1;MAP1LC3A;MFN2;VDAC1;TOMM20	7	22
R-HSA-72766	Translation	36/281	0.000942245	1.85409	12.9179	EIF4A2;AARS1;RPL3;MRPS16;MRPS11;MRPS33;MRPS10;MRPL14;MRPL15;MRPL37;APEH;YARS1;MRPL10;MRPL33;MRPL3;MRPL1;NARS1;IARS1;GADD45GIP1;TSFM;HARS1;SSR4;EIF1AX;MRPS23;MRPS21;RPL23A;MRPL21;WARS1;MRPL44;SARS1;PPA1;FARSA;EEF1E1;CARS1;RPL28;FARSB	36	281
R-HSA-3700989	Transcriptional Regulation By TP53	43/354	0.000970219	1.74677	12.119	MRE11;CCNH;EHMT1;PPP2CA;PRDX2;POLR2B;AKT2;POLR2C;SESN2;TNKS1BP1;PMS2;EP300;COX14;POLR2H;BANP;NELFE;UBL4A;PLK3;CREBBP;JUN;TIGAR;RFC2;TAF13;HIPK1;MAPK14;COX6B1;CDK9;CNOT4;TNRC6C;MOV10;RRAGA;CNOT6;RGCC;GNPDA1;RRAGC;BCL6;RRM2B;CCNE1;AGO2;CDK12;SGK1;LAMTOR3;TNRC6B	43	354
R-HSA-9716542	Signaling By Rho GTPases, Miro GTPases And RHOBTB3	71/660	0.000998995	1.52936	10.566	CPNE8;CLTC;STMN2;ARHGDIG;MSI2;ARHGAP4;RND1;AKAP13;BAIAP2L1;VPS72;FLOT1;WDR6;FLOT2;ARHGEF10;PLEKHG1;ATP6AP1;RALGAPA1;PPP2R5B;PPP2R5D;RANGAP1;CKAP4;SRRM1;DYNC1LI1;CLIP1;DDX39B;WDR81;CCNE1;PEAK1;CDC42EP3;MYH9;NUP98;MAD1L1;ITGB3BP;PAFAH1B1;ROCK2;ARHGAP18;ARHGAP17;IQGAP2;KLC1;NUP160;PPP2CA;NCKIPSD;KLC4;PARD6A;ARL13B;SLITRK3;EMC3;FLNA;MFN2;CSK;RBBP6;ECT2;DYNC1I1;H2AZ1;BCAP31;GIT2;EGR2;JUP;PCDH7;LIMK1;W…	71	660
R-HSA-9609507	Protein Localization	24/164	0.00105412	2.15765	14.7908	DNAJC19;TOMM70;ATAD1;UBL4A;ACOT8;CAMLG;MTX2;TIMM9;PEX11B;TIMM13;TIMM23;TOMM20;PEX7;ATP5F1A;SERP1;ATP5F1B;GRPEL1;PITRM1;GRPEL2;TIMM17A;PMPCB;VDAC1;SLC25A12;SLC25A4	24	164
R-HSA-8878171	Transcriptional Regulation By RUNX1	28/204	0.00117707	2.00393	13.516	KMT2E;KMT2D;PSMD12;SMARCD3;CBFB;PSMD14;CCNH;KMT2C;DPY30;PSMB4;PSMB5;PSMD3;EP300;H2AZ1;CREBBP;PBRM1;CBX4;ARID1A;TNRC6C;MOV10;OCLN;NR4A3;PSMA1;PSMC4;PSME3;PSME4;AGO2;TNRC6B	28	204
R-HSA-9018519	Estrogen-dependent Gene Expression	19/119	0.00119556	2.38842	16.072	H2AZ1;DDX5;CREBBP;JUN;KDM4B;CBFB;CHD1;CDK9;TNRC6C;MOV10;POLR2B;POLR2C;AGO2;BCL2;EP300;FOSB;ZNF217;POLR2H;TNRC6B	19	119
R-HSA-8953854	Metabolism Of RNA	71/666	0.00127096	1.51343	10.0915	EIF4A2;SMG1;RPL3;TUT7;CCNH;TUT4;HNRNPU;PRPF19;PQBP1;PTBP1;FBL;LSM11;PCF11;PSMD3;TNKS1BP1;TRMT44;NUP214;NDC1;SRRM2;WDR36;SNRPN;WDR75;IMP4;SRRM1;QTRT1;DDX39B;PSMA1;PSME3;DNAJC5;PSME4;NUP98;SNRNP25;SRSF5;RPL28;SF1;DDX5;PSMD12;PSMD14;RNMT;DDX1;NOP2;SNU13;NUP160;ZFP36L1;PPP2CA;PSMB4;PSMB5;POLR2B;POLR2C;LCMT2;POLR2H;TRDMT1;CPSF4;HSPA8;FUS;ADAT1;LSM1;RPL23A;WDR12;MAPK14;SNUPN;U2SURP;LSM2;CNOT4;CNOT6;PAN…	71	666
R-HSA-169911	Regulation Of Apoptosis	11/52	0.00128503	3.36504	22.401	MED12;PSMD12;PSMB4;PSMB5;PSMA1;PSMD14;PSMC4;PSME3;PSMD3;PSME4;PKN2	11	52
R-HSA-194315	Signaling By Rho GTPases	69/644	0.00129773	1.5215	10.1136	CPNE8;CLTC;STMN2;ARHGDIG;MSI2;ARHGAP4;RND1;AKAP13;BAIAP2L1;VPS72;FLOT1;WDR6;FLOT2;ARHGEF10;PLEKHG1;ATP6AP1;RALGAPA1;PPP2R5B;PPP2R5D;RANGAP1;CKAP4;SRRM1;DYNC1LI1;CLIP1;DDX39B;WDR81;PEAK1;CDC42EP3;MYH9;NUP98;MAD1L1;ITGB3BP;PAFAH1B1;ROCK2;ARHGAP18;ARHGAP17;IQGAP2;KLC1;NUP160;PPP2CA;NCKIPSD;KLC4;PARD6A;ARL13B;SLITRK3;EMC3;FLNA;CSK;RBBP6;ECT2;DYNC1I1;H2AZ1;BCAP31;GIT2;EGR2;JUP;PCDH7;LIMK1;WWP2;STAM;MA…	69	644
R-HSA-6807070	PTEN Regulation	21/139	0.00140307	2.23802	14.7017	PSMD12;JUN;PSMD14;CBX4;WWP2;RNF146;TNRC6C;MOV10;RRAGA;PSMB4;PSMB5;RRAGC;PSMA1;PSMC4;AKT2;PSME3;PSMD3;PSME4;AGO2;LAMTOR3;TNRC6B	21	139
R-HSA-162909	Host Interactions Of HIV Factors	20/130	0.00143918	2.28589	14.9581	NUP214;NDC1;PSMD12;PSMD14;RANGAP1;NUP160;CDK9;PSMB4;PSMB5;PSMA1;PSMC4;PSME3;PSMD3;PSME4;AP2S1;PKN2;NUP98;SLC25A5;SLC25A4;AP2M1	20	130
R-HSA-74752	Signaling By Insulin Receptor	14/77	0.001449	2.78957	18.2351	ATP6V1A;ATP6V0B;ATP6V1G1;ATP6AP1;IRS2;FGF9;AKT2;ATP6V1B2;ATP6V1E1;ATP6V0D1;HRAS;ATP6V1D;ATP6V1C1;FGFR1	14	77
R-HSA-9663891	Selective Autophagy	12/61	0.00153781	3.07237	19.901	TOMM70;PRKN;DYNC1LI1;HSPA8;PINK1;MAP1LC3A;ARL13B;MFN2;VDAC1;TOMM20;HDAC6;DYNC1I1	12	61
R-HSA-2467813	Separation Of Sister Chromatids	24/170	0.00173946	2.06831	13.1424	PSMD12;ANAPC7;PSMD14;PPP2R5B;PPP2R5D;RANGAP1;HDAC8;NUP160;PPP2CA;DYNC1LI1;CLIP1;KIF18A;PSMB4;PSMB5;PSMA1;PSMC4;PSME3;PSMD3;PSME4;NUP98;MAD1L1;ITGB3BP;DYNC1I1;PAFAH1B1	24	170
R-HSA-450408	AUF1 (hnRNP D0) Binds And Destabilizes mRNA	11/54	0.00177672	3.20818	20.3174	HSPA8;PSMD12;PSMB4;PSMB5;PSMA1;PSMD14;PSMC4;PSME3;PSMD3;PSME4;HNRNPD	11	54
R-HSA-4641257	Degradation Of AXIN	11/54	0.00177672	3.20818	20.3174	RNF146;PSMD12;PSMB4;PSMB5;PSMA1;PSMD14;SMURF2;PSMC4;PSME3;PSMD3;PSME4	11	54
R-HSA-8941858	Regulation Of RUNX3 Expression And Activity	11/54	0.00177672	3.20818	20.3174	PSMD12;PSMB4;PSMB5;PSMA1;CBFB;PSMD14;SMURF2;PSMC4;PSME3;PSMD3;EP300	11	54
R-HSA-429947	Deadenylation Of mRNA	7/25	0.00178554	4.87046	30.8204	EIF4A2;CNOT4;CNOT6;TUT7;PAN3;TUT4;TNKS1BP1	7	25
R-HSA-888590	GABA Synthesis, Release, Reuptake And Degradation	6/19	0.00192993	5.77797	36.1139	HSPA8;SNAP25;RAB3A;SYT1;DNAJC5;CPLX1	6	19
R-HSA-69275	G2/M Transition	25/182	0.00207461	2.00371	12.3789	PSMD12;PSMD14;DCTN2;CCNH;PPP2CA;ACTR1A;PSMB4;PSMB5;PPME1;PSMD3;CNTRL;EP300;OFD1;FBXW11;ODF2;TUBB;TUBA4A;WEE1;PSMA1;NME7;PSMC4;PSME3;PSME4;OPTN;PAFAH1B1	25	182
R-HSA-5362768	Hh Mutants Are Degraded By ERAD	11/55	0.00207463	3.1351	19.3685	ERLEC1;SHH;PSMD12;PSMB4;PSMB5;PSMA1;PSMD14;PSMC4;PSME3;PSMD3;PSME4	11	55
R-HSA-68882	Mitotic Anaphase	30/232	0.00207806	1.87063	11.5536	PSMD12;PSMD14;HDAC8;NUP160;PPP2CA;PSMB4;PSMB5;TUBB3;PSMD3;LMNA;DYNC1I1;NDC1;ANAPC7;TUBB;PPP2R5B;PPP2R5D;RANGAP1;TUBA4A;DYNC1LI1;CLIP1;KIF18A;TUBB2A;PSMA1;PSMC4;PSME3;PSME4;NUP98;MAD1L1;ITGB3BP;PAFAH1B1	30	232
R-HSA-6807878	COPI-mediated Anterograde Transport	14/80	0.0021134	2.66234	16.3986	NSF;RAB1A;DCTN2;ANK1;COPZ1;NAPG;DYNC1LI1;ACTR1A;CAPZA2;COPG1;ACTR10;ARF5;DYNC1I1;COPE	14	80
R-HSA-2555396	Mitotic Metaphase And Anaphase	30/233	0.00222025	1.86132	11.3729	PSMD12;PSMD14;HDAC8;NUP160;PPP2CA;PSMB4;PSMB5;TUBB3;PSMD3;LMNA;DYNC1I1;NDC1;ANAPC7;TUBB;PPP2R5B;PPP2R5D;RANGAP1;TUBA4A;DYNC1LI1;CLIP1;KIF18A;TUBB2A;PSMA1;PSMC4;PSME3;PSME4;NUP98;MAD1L1;ITGB3BP;PAFAH1B1	30	233
R-HSA-453274	Mitotic G2-G2/M Phases	25/184	0.0024117	1.97829	11.924	PSMD12;PSMD14;DCTN2;CCNH;PPP2CA;ACTR1A;PSMB4;PSMB5;PPME1;PSMD3;CNTRL;EP300;OFD1;FBXW11;ODF2;TUBB;TUBA4A;WEE1;PSMA1;NME7;PSMC4;PSME3;PSME4;OPTN;PAFAH1B1	25	184
R-HSA-373760	L1CAM Interactions	16/99	0.0024822	2.42054	14.5199	HSPA8;CLTC;LAMC1;ANK1;GAP43;CHL1;SCN8A;CNTN1;NUMB;AP2S1;SCN2A;AP2M1;SCN1B;SCN1A;FGFR1;SCN2B	16	99
R-HSA-1234174	Cellular Response To Hypoxia	13/73	0.00255911	2.71842	16.2238	PSMD12;CREBBP;PSMD14;CUL2;LIMD1;PSMB4;PSMB5;PSMA1;PSMC4;PSME3;PSMD3;PSME4;EP300	13	73
R-HSA-3781860	Diseases Associated With N-glycosylation Of Proteins	6/20	0.00258572	5.36497	31.9632	DPAGT1;EGFL7;B4GALT1;ALG14;ALG13;MPDU1	6	20
R-HSA-5620924	Intraflagellar Transport	9/41	0.00266083	3.52449	20.8971	DYNC2H1;DYNC2I1;TTC26;IFT74;KIF3B;KIF3A;IFT140;IFT122;KIFAP3	9	41
R-HSA-211733	Regulation Of Activated PAK-2p34 By Proteasome Mediated Degradation	10/49	0.00279288	3.21417	18.9015	PSMD12;PSMB4;PSMB5;PSMA1;PSMD14;PSMC4;PSME3;PSMD3;PSME4;PKN2	10	49
R-HSA-5688426	Deubiquitination	34/279	0.00295845	1.74867	10.1826	PRKN;BECN1;PSMD12;USP37;INO80D;PSMD14;TRRAP;ABRAXAS2;MAT2B;TOMM20;VCPIP1;UCHL1;PSMB4;PSMB5;PSMD3;EP300;TOMM70;MBD6;USP5;SMURF2;RAD23A;STAM;UCHL5;RNF146;H2AC25;PSMA1;PSMC4;PSME3;PTRH2;PSME4;ASXL2;FKBP8;VDAC2;VDAC1	34	279
R-HSA-69206	G1/S Transition	19/129	0.00310087	2.17011	12.5347	PRIM2;PSMD12;PSMD14;CCNH;CDC7;ORC5;PPP2CA;PSMB4;WEE1;PSMB5;PSMA1;CCNE1;PSMC4;AKT2;PSME3;PSMD3;POLE3;MCM6;POLE	19	129
R-HSA-201681	TCF Dependent Signaling In Response To WNT	26/198	0.00321858	1.90187	10.9145	KMT2D;PSMD12;PSMD14;TRRAP;KLHL12;PPP2CA;PSMB4;PSMB5;AKT2;PSMD3;RSPO2;EP300;SOX6;BCL9L;H2AZ1;CREBBP;SMURF2;PPP2R5B;PPP2R5D;WNT9A;RNF146;PSMA1;PSMC4;PSME3;PSME4;LGR6	26	198
R-HSA-5387390	Hh Mutants Abrogate Ligand Secretion	11/58	0.00321911	2.93451	16.8401	ERLEC1;SHH;PSMD12;PSMB4;PSMB5;PSMA1;PSMD14;PSMC4;PSME3;PSMD3;PSME4	11	58
R-HSA-8948751	Regulation Of PTEN Stability And Activity	12/67	0.00350998	2.73631	15.466	RNF146;PSMD12;PSMB4;PSMB5;PSMA1;PSMD14;PSMC4;AKT2;PSME3;PSMD3;PSME4;WWP2	12	67
R-HSA-5205647	Mitophagy	7/28	0.00361587	4.174	23.468	PRKN;TOMM70;PINK1;MAP1LC3A;MFN2;VDAC1;TOMM20	7	28
R-HSA-5610780	Degradation Of GLI1 By Proteasome	11/59	0.00369701	2.87322	16.0907	PSMD12;PSMB4;PSMB5;PSMA1;PSMD14;PSMC4;PSME3;PSMD3;PSME4;NUMB;PRKACB	11	59
R-HSA-5610785	GLI3 Is Processed To GLI3R By Proteasome	11/59	0.00369701	2.87322	16.0907	PSMD12;PSMB4;PSMB5;PSMA1;PSMD14;PSMC4;PSME3;PSMD3;PSME4;PRKACB;GLI3	11	59
R-HSA-68886	M Phase	43/380	0.00376265	1.6097	8.98635	RAB1A;PSMD12;PSMD14;DCTN2;HDAC8;NUP160;PPP2CA;ACTR1A;NIPBL;PSMB4;PSMB5;TUBB3;PSMD3;CNTRL;LMNA;DYNC1I1;NUP214;NDC1;OFD1;RAB2A;H2AZ1;ANAPC7;ODF2;TUBB;PPP2R5B;KIF23;PPP2R5D;RANGAP1;TUBA4A;DYNC1LI1;CLIP1;KIF18A;TUBB2A;PSMA1;NME7;PSMC4;PSME3;PSME4;PPP2R2D;NUP98;MAD1L1;ITGB3BP;PAFAH1B1	43	380
R-HSA-1222556	ROS And RNS Production In Phagocytes	8/36	0.0041855	3.57878	19.5979	ATP6V1A;ATP6V0B;ATP6V1G1;ATP6V1B2;ATP6V1E1;ATP6V0D1;ATP6V1D;ATP6V1C1	8	36
R-HSA-5689603	UCH Proteinases	15/95	0.00418616	2.35313	12.8857	PSMD12;INO80D;MBD6;PSMD14;UCHL5;UCHL1;PSMB4;PSMB5;H2AC25;PSMA1;PSMC4;PSME3;PSMD3;PSME4;ASXL2	15	95
R-HSA-8949215	Mitochondrial Calcium Ion Transport	6/22	0.00437952	4.69384	25.4914	STOML2;PMPCB;VDAC2;MICU3;VDAC1;PHB2	6	22
R-HSA-1632852	Macroautophagy	17/114	0.00438379	2.20046	11.9481	TOMM70;PRKN;HSPA8;BECN1;GABARAPL1;TOMM20;HDAC6;DYNC1LI1;RRAGA;PINK1;MAP1LC3A;RRAGC;ARL13B;MFN2;VDAC1;LAMTOR3;DYNC1I1	17	114
R-HSA-187037	Signaling By NTRK1 (TRKA)	17/114	0.00438379	2.20046	11.9481	DUSP4;EGR2;EGR4;CLTC;IRS2;PPP2R5D;MAPK14;DUSP7;PPP2CA;RIT2;AP2S1;EP300;FOSB;TRIB1;SGK1;HRAS;AP2M1	17	114
R-HSA-8948700	Competing Endogenous RNAs (ceRNAs) Regulate PTEN Translation	4/10	0.00440788	8.33784	45.2275	TNRC6C;MOV10;AGO2;TNRC6B	4	10
R-HSA-168799	Neurotoxicity Of Clostridium Toxins	4/10	0.00440788	8.33784	45.2275	SNAP25;SYT1;SV2A;VAMP1	4	10
R-HSA-1640170	Cell Cycle	67/654	0.0044545	1.44419	7.81859	MRE11;CCNH;CDC14A;NIPBL;ACTR1A;TUBB3;PPME1;AKT2;PSMD3;CNTRL;EP300;POLE;NUP214;NDC1;OFD1;RAB2A;ANAPC7;RFC2;FBXW11;TUBB;PPP2R5B;KIF23;PPP2R5D;RANGAP1;TUBA4A;DYNC1LI1;CLIP1;TUBB2A;PSMA1;NME7;CCNE1;PSME3;PSME4;UBE2V2;NUP98;MCM6;OPTN;MAD1L1;ITGB3BP;PAFAH1B1;RAB1A;PRIM2;RTEL1;PSMD12;PSMD14;DCTN2;HDAC8;NUP160;ORC5;PPP2CA;PSMC3IP;PSMB4;PSMB5;POLR2B;POLR2C;LMNA;POLR2H;DYNC1I1;H2AZ1;CDKN2C;ODF2;CDC7;KIF18A…	67	654
R-HSA-198725	Nuclear Events (Kinase And Transcription Factor Activation)	11/61	0.0048222	2.75799	14.7126	DUSP4;PPP2CA;EGR2;EGR4;EP300;FOSB;PPP2R5D;SGK1;TRIB1;MAPK14;DUSP7	11	61
R-HSA-8866427	VLDLR Internalisation And Degradation	5/16	0.00488248	5.6872	30.2678	MYLIP;CLTC;AP2S1;VLDLR;AP2M1	5	16
R-HSA-1168372	Downstream Signaling Events Of B Cell Receptor (BCR)	13/79	0.00518437	2.47049	13	PSMD12;PSMD14;FBXW11;NFATC1;PPP3CB;PSMB4;PSMB5;PSMA1;PSMC4;PSME3;PSMD3;PSME4;HRAS	13	79
R-HSA-450531	Regulation Of mRNA Stability By Proteins That Bind AU-rich Elements	14/88	0.00518736	2.37349	12.4882	NUP214;HSPA8;PSMD12;PSMD14;MAPK14;ZFP36L1;PSMB4;PSMB5;PSMA1;PSMC4;PSME3;PSMD3;PSME4;HNRNPD	14	88
R-HSA-210500	Glutamate Neurotransmitter Release Cycle	6/23	0.00555886	4.4175	22.9372	SNAP25;RAB3A;SYT1;ARL6IP5;SLC1A3;CPLX1	6	23
R-HSA-1592230	Mitochondrial Biogenesis	14/89	0.00574599	2.34171	12.0815	CREBBP;ALAS1;SMARCD3;ATP5PD;ATP5PB;MTX2;ATP5MC3;MICOS13;NRF1;MAPK14;ATP5F1D;ATP5F1A;ATP5F1B;ATP5PO	14	89
R-HSA-8876198	RAB GEFs Exchange GTP For GDP On RABs	14/89	0.00574599	2.34171	12.0815	RAB1A;TRAPPC3;RAB5B;RAB3A;TRAPPC1;GDI1;DENND2B;RAB39B;AKT2;RAB12;TRAPPC13;RAB6A;SBF2;RAB3GAP1	14	89
R-HSA-3371497	HSP90 Chaperone Cycle For Steroid Hormone Receptors (SHR) In Presence Of Ligand	8/38	0.00592881	3.33984	17.1265	HSPA8;DYNC1LI1;ACTR1A;DCTN2;CAPZA2;DNAJA2;ACTR10;DYNC1I1	8	38
R-HSA-453279	Mitotic G1 Phase And G1/S Transition	20/147	0.00612059	1.97808	10.0805	PRIM2;PSMD12;CDKN2C;PSMD14;CCNH;CDC7;ORC5;PPP2CA;PSMB4;WEE1;PSMB5;PSMA1;CCNE1;PSMC4;AKT2;PSME3;PSMD3;POLE3;MCM6;POLE	20	147
R-HSA-5663202	Diseases Of Signal Transduction By Growth Factor Receptors And Second Messengers	46/424	0.00613814	1.53496	7.8179	PSMD12;PSMD14;RNMT;CLTC;IRS2;CCNC;ZC3HAV1;KLC1;HDAC8;DLL1;HDAC6;PPP2CA;ERLEC1;SHH;PSMB4;SPRED1;RNF213;PSMB5;FGF9;POLR2B;AKT2;POLR2C;PSMD3;CNTRL;LMNA;EP300;CSK;POLR2H;HRAS;CAMK2G;CREBBP;BAD;PPP2R5B;PPP2R5D;DUSP7;NCOR2;CLCN6;PSMA1;PSMC4;PSME3;PSME4;MYH9;CARS1;MAMLD1;BCL2L1;FGFR1	46	424
R-HSA-5673001	RAF/MAP Kinase Cascade	32/271	0.00616852	1.68535	8.57556	RET;PSMD12;PSMD14;RNMT;RASGRF1;IRS2;PPP2CA;PSMB4;SPRED1;PSMB5;FGF9;PSMD3;PEA15;NEFL;CSK;HRAS;JAK3;CAMK2G;DUSP4;DUSP5;PPP2R5B;PPP2R5D;GFRA2;DUSP7;PPP5C;PSMA1;PSMC4;PSME3;PSME4;LAMTOR3;BCL2L1;FGFR1	32	271
R-HSA-446203	Asparagine N-linked Glycosylation	33/282	0.00626976	1.66845	8.46243	DPAGT1;RAB1A;SEC23A;CMAS;B4GALT1;DCTN2;NGLY1;NAPG;NEU3;ACTR1A;SLC17A5;GFUS;DYNC1I1;MARCHF6;MPDU1;NSF;CHGA;TRAPPC3;EGFL7;TRAPPC1;ALG14;ALG13;ANK1;COPZ1;DYNC1LI1;NAGK;CAPZA2;COPG1;ACTR10;CNIH3;ARF5;COPE;B4GALT5	33	282
R-HSA-611105	Respiratory Electron Transport	14/90	0.00635187	2.31078	11.6902	NDUFB9;NDUFA12;NDUFB5;NDUFC2;UQCR11;ECSIT;COQ10B;COX6B1;NDUFAF7;UQCRC1;COX14;TMEM126B;UQCRC2;NDUFAF1	14	90
R-HSA-8934593	Regulation Of RUNX1 Expression And Activity	5/17	0.0064997	5.21298	26.2526	TNRC6C;MOV10;CBFB;AGO2;TNRC6B	5	17
R-HSA-8943723	Regulation Of PTEN mRNA Translation	4/11	0.0065231	7.14633	35.9632	TNRC6C;MOV10;AGO2;TNRC6B	4	11
R-HSA-1660517	Synthesis Of PIPs At Late Endosome Membrane	4/11	0.0065231	7.14633	35.9632	FIG4;MTMR9;MTMR4;MTMR7	4	11
R-HSA-5140745	WNT5A-dependent Internalization Of FZD2, FZD5 And ROR2	4/11	0.0065231	7.14633	35.9632	CLTC;AP2S1;CLTB;AP2M1	4	11
R-HSA-4641258	Degradation Of DVL	10/55	0.00663764	2.78471	13.9653	PSMD12;PSMB4;PSMB5;PSMA1;PSMD14;PSMC4;PSME3;PSMD3;PSME4;KLHL12	10	55
R-HSA-69239	Synthesis Of DNA	17/119	0.00678539	2.09202	10.4454	PRIM2;PSMD12;ANAPC7;PSMD14;RFC2;ORC5;PSMB4;PSMB5;PSMA1;CCNE1;PSMC4;PSME3;PSMD3;PSME4;POLE3;MCM6;POLE	17	119
R-HSA-9755511	KEAP1-NFE2L2 Pathway	15/100	0.00679894	2.21411	11.0506	UBL4A;PSMD12;CREBBP;PSMD14;PSMB4;PSMB5;PSMA1;PSMC4;AKT2;PSME3;PSMD3;SESN2;PSME4;EP300;ATF4	15	100
R-HSA-168275	Entry Of Influenza Virion Into Host Cell Via Endocytosis	3/6	0.00687486	12.5003	62.2502	PBRM1;XK;CLTC	3	6
R-HSA-5358346	Hedgehog Ligand Biogenesis	11/64	0.00700022	2.60146	12.9079	ERLEC1;SHH;PSMD12;PSMB4;PSMB5;PSMA1;PSMD14;PSMC4;PSME3;PSMD3;PSME4	11	64
R-HSA-1234176	Oxygen-dependent Proline Hydroxylation Of Hypoxia-inducible Factor Alpha	11/64	0.00700022	2.60146	12.9079	PSMD12;PSMB4;PSMB5;PSMA1;PSMD14;PSMC4;PSME3;PSMD3;PSME4;CUL2;LIMD1	11	64
R-HSA-170834	Signaling By TGF-beta Receptor Complex	14/91	0.00700776	2.28064	11.3137	TGIF1;TGFB2;SMURF2;LTBP4;CCNC;LTBP3;MTMR4;UCHL5;NCOR2;CDK9;SKI;PARD6A;EP300;SKIL	14	91
R-HSA-199991	Membrane Trafficking	61/599	0.00729894	1.43247	7.04777	RAB3A;GDI1;CLTC;CLTB;ACTR1A;AP1G2;AKT2;ARFIP2;TRAPPC13;KIFAP3;SBF2;AP2M1;NSF;DENND2B;KIF23;EPS15L1;ANK1;COPZ1;DYNC1LI1;KIF9;DNAJC6;MYH9;OPTN;ARF5;PAFAH1B2;PAFAH1B1;RAB1A;RAB5B;SEC23A;DCTN2;COPS7A;KLC1;NAPG;KLC4;GGA3;KIF3B;KIF3A;AP2S1;PACSIN2;VPS54;STX4;RAB6A;EPS15;DYNC1I1;TRAPPC3;HSPA8;TRAPPC1;SYT1;RAB39B;STAM;SNAP91;COPS3;KIF18A;SYNJ1;RAB12;CAPZA2;COPG1;CNIH3;ACTR10;RAB3GAP1;COPE	61	599
R-HSA-71387	Metabolism Of Carbohydrates	33/285	0.00732716	1.64832	8.10342	PRPS2;B4GALT1;ENO2;NUP160;HS6ST3;PPP2CA;PCNX4;B3GALT2;PGK1;GPC4;MAN2C1;SLC37A4;PRKACB;NUP214;NDC1;UBL4A;TPI1;MDH1;MDH2;GOT2;B3GAT1;PPP2R5D;GALE;PKM;GNPDA1;B4GAT1;CSPG4;NUP98;SLC25A12;SLC25A11;PFKM;PFKP;B4GALT5	33	285
R-HSA-422475	Axon Guidance	54/519	0.00739055	1.46591	7.19401	RET;RPL3;CLTC;CLTB;IRS2;MSI1;VLDLR;LAMC1;RND1;PPP3CB;DPYSL4;CHL1;VPS72;DPYSL3;PSMD3;PRKACB;HRAS;AP2M1;SCN1B;SCN1A;EPHA5;TRPC6;ANK1;GFRA2;GAP43;PSMA1;COL4A1;PSME3;SCN8A;PSME4;NUMB;MYH9;RPL28;EPHA3;PSMD12;PSMD14;RNMT;ROCK2;CUL2;CRMP1;PSMB4;PSMB5;FLRT3;AP2S1;HSPA8;LIMK1;RPL23A;MAPK14;PSMC4;CNTN1;PKN2;SCN2A;SCN2B;FGFR1	54	519
R-HSA-983168	Antigen Processing: Ubiquitination And Proteasome Degradation	35/307	0.00745593	1.62013	7.93662	PRKN;PSMD12;PSMD14;RNF14;CUL2;ASB13;KLHL11;RNF115;PSMB4;RNF213;PSMB5;PSMD3;RBBP6;FBXO9;HERC6;FBXW4;MYLIP;ANAPC7;SMURF2;FBXW11;FBXO17;UBE2E2;FBXL15;PJA2;KLHL42;RNF126;KBTBD6;PSMA1;PSMC4;PSME3;PSME4;UBE2V2;UBE2O;TRIM37;ASB5	35	307
R-HSA-2454202	Fc Epsilon Receptor (FCERI) Signaling	18/130	0.00753017	2.01759	9.86366	MAP2K4;PSMD12;JUN;PSMD14;FBXW11;NFATC1;RASGRP2;PPP3CB;PSMB4;PSMB5;PSMA1;PSMC4;PSME3;PSMD3;PSME4;LCP2;PKN2;HRAS	18	130
R-HSA-9012999	RHO GTPase Cycle	47/441	0.00779777	1.50436	7.30203	CPNE8;ROCK2;CLTC;STMN2;ARHGDIG;ARHGAP18;ARHGAP17;MSI2;IQGAP2;ARHGAP4;RND1;AKAP13;PARD6A;BAIAP2L1;ARL13B;SLITRK3;EMC3;FLOT1;WDR6;FLOT2;CSK;RBBP6;ECT2;BCAP31;GIT2;ARHGEF10;PLEKHG1;EGR2;JUP;ATP6AP1;RALGAPA1;PCDH7;WWP2;STAM;MPP7;CKAP4;SRRM1;CCT6A;FMNL3;ARHGAP31;DDX39B;WDR81;PEAK1;DLG5;CDC42EP3;PKN2;ESYT1	47	441
R-HSA-5658442	Regulation Of RAS By GAPs	11/65	0.00787558	2.55314	12.3674	SPRED1;PSMD12;PSMB4;PSMB5;PSMA1;PSMD14;PSMC4;PSME3;PSMD3;PSME4;HRAS	11	65
R-HSA-5576892	Phase 0 - Rapid Depolarisation	7/32	0.00792706	3.5054	16.9573	FGF14;SCN8A;SCN2A;CAMK2G;SCN1B;SCN1A;SCN2B	7	32
R-HSA-1236978	Cross-presentation Of Soluble Exogenous Antigens (Endosomes)	9/48	0.0079877	2.8908	13.9621	PSMD12;PSMB4;PSMB5;PSMD14;PSMA1;PSMC4;PSME3;PSMD3;PSME4	9	48
R-HSA-112316	Neuronal System	42/386	0.00813933	1.53861	7.40232	NLGN3;GABRB2;KCNG2;SNAP25;RAB3A;KCNK9;KCNA1;KCNA2;RASGRF1;SLC1A3;CPLX1;PTPRF;NCALD;ADCY5;EPB41L3;SLITRK3;AP2S1;ARL6IP5;FLOT1;NPTN;NEFL;FLOT2;PRKACB;HRAS;CAMK2G;AP2M1;NSF;GABRA1;HSPA8;KCNH4;KCNH5;KCND2;SYT1;KCNJ16;GABRG2;PRKAR1B;GLRB;KCNS2;DNAJC5;KCNS3;PLCB1;KCNK3	42	386
R-HSA-5653656	Vesicle-mediated Transport	64/637	0.00814773	1.41134	6.78857	RAB3A;GDI1;CLTC;CLTB;ACTR1A;AP1G2;AKT2;ARFIP2;TRAPPC13;KIFAP3;SBF2;SCARF1;AP2M1;NSF;DENND2B;KIF23;EPS15L1;ANK1;COPZ1;DYNC1LI1;KIF9;DNAJC6;COL4A1;MYH9;OPTN;ARF5;PAFAH1B2;PAFAH1B1;RAB1A;RAB5B;SEC23A;DCTN2;COPS7A;KLC1;NAPG;KLC4;GGA3;KIF3B;KIF3A;AP2S1;PACSIN2;VPS54;STX4;RAB6A;EPS15;DYNC1I1;TRAPPC3;HSPA8;TRAPPC1;SYT1;RAB39B;SSC5D;STAM;SNAP91;COPS3;KIF18A;SYNJ1;RAB12;CAPZA2;COPG1;CNIH3;ACTR10;RAB3GAP1;…	64	637
R-HSA-5684996	MAPK1/MAPK3 Signaling	32/277	0.00845116	1.64354	7.84535	RET;PSMD12;PSMD14;RNMT;RASGRF1;IRS2;PPP2CA;PSMB4;SPRED1;PSMB5;FGF9;PSMD3;PEA15;NEFL;CSK;HRAS;JAK3;CAMK2G;DUSP4;DUSP5;PPP2R5B;PPP2R5D;GFRA2;DUSP7;PPP5C;PSMA1;PSMC4;PSME3;PSME4;LAMTOR3;BCL2L1;FGFR1	32	277
R-HSA-5635838	Activation Of SMO	5/18	0.008458	4.81172	22.9646	SHH;KIF3A;BOC;GAS1;EFCAB7	5	18
R-HSA-9711123	Cellular Response To Chemical Stress	23/182	0.00848938	1.81753	8.6677	ERO1A;UBL4A;PSMD12;CREBBP;SMARCD3;PSMD14;COX6B1;NCOR2;PRDX2;PSMB4;PSMB5;PSMA1;PSMC4;AKT2;PSME3;PSMD3;SESN2;PSME4;EP300;BLVRB;COX14;BLVRA;ATF4	23	182
R-HSA-1280218	Adaptive Immune System	72/733	0.00880113	1.37739	6.519	RNF14;CLTC;PTPRJ;RNF115;ACTR1A;PPP3CB;ACTR1B;AKT2;PSMD3;CTSF;KIFAP3;PRKACB;HRAS;AP2M1;FBXO9;HERC6;FBXW4;MYLIP;ANAPC7;FBXW11;FBXO17;PPP2R5B;UBE2E2;KIF23;PPP2R5D;PJA2;KLHL42;DYNC1LI1;RNF126;PSMA1;PSME3;PSME4;UBE2V2;LCP2;PRKN;BECN1;SEC23A;PSMD12;PSMD14;DCTN2;CUL2;ASB13;KLHL11;PRICKLE1;KLC1;RASGRP2;PPP2CA;KLC4;PSMB4;RNF213;PSMB5;KIF3B;KIF3A;AP2S1;STX4;CSK;RBBP6;DYNC1I1;SMURF2;NFATC1;FBXL15;KIF18A;KBT…	72	733
R-HSA-8936459	RUNX1 Regulates Genes Involved In Megakaryocyte Differentiation And Platelet Function	11/66	0.00883365	2.50659	11.8541	KMT2E;H2AZ1;TNRC6C;KMT2D;MOV10;NR4A3;CBFB;KMT2C;DPY30;EP300;TNRC6B	11	66
R-HSA-83936	Transport Of Nucleosides And Free Purine And Pyrimidine Bases Across Plasma Membrane	4/12	0.0092162	6.2527	29.3051	ARL2BP;SLC25A5;SLC29A1;SLC25A4	4	12
R-HSA-199977	ER To Golgi Anterograde Transport	18/133	0.00948455	1.96464	9.15145	NSF;TRAPPC3;RAB1A;SEC23A;TRAPPC1;DCTN2;ANK1;COPZ1;NAPG;DYNC1LI1;ACTR1A;CAPZA2;COPG1;CNIH3;ACTR10;COPE;ARF5;DYNC1I1	18	133
R-HSA-5675221	Negative Regulation Of MAPK Pathway	8/41	0.00951152	3.03572	14.1321	PPP2CA;DUSP4;DUSP5;PPP5C;PPP2R5B;PPP2R5D;HRAS;DUSP7	8	41
R-HSA-5676590	NIK To Noncanonical NF-kB Signaling	10/58	0.00968471	2.61024	12.1042	PSMD12;PSMB4;PSMB5;PSMA1;PSMD14;FBXW11;PSMC4;PSME3;PSMD3;PSME4	10	58
R-HSA-948021	Transport To Golgi And Subsequent Modification	21/164	0.010006	1.84425	8.49197	NSF;CHGA;TRAPPC3;RAB1A;SEC23A;TRAPPC1;B4GALT1;DCTN2;ANK1;COPZ1;NAPG;DYNC1LI1;ACTR1A;CAPZA2;COPG1;CNIH3;ACTR10;COPE;ARF5;DYNC1I1;B4GALT5	21	164
R-HSA-8878159	Transcriptional Regulation By RUNX3	14/95	0.0101884	2.16755	9.94148	PSMD12;CREBBP;CBFB;PSMD14;SMURF2;CXXC1;PSMB4;PSMB5;PSMA1;PSMC4;PSME3;PSMD3;EP300;MAMLD1	14	95
R-HSA-350562	Regulation Of Ornithine Decarboxylase (ODC)	9/50	0.0104502	2.74948	12.5408	PSMD12;PSMB4;PSMB5;PSMA1;PSMD14;PSMC4;PSME3;PSMD3;PSME4	9	50
R-HSA-389960	Formation Of Tubulin Folding Intermediates By CCT/TriC	6/26	0.0104759	3.75426	17.1145	CCT6A;TUBB2A;TUBB3;TUBB;CCT5;TUBA4A	6	26
R-HSA-9006931	Signaling By Nuclear Receptors	30/260	0.0106913	1.64039	7.44463	DDX5;CBFB;CHD1;IGF1R;CYP26B1;RDH11;POLR2B;AKT2;POLR2C;PDK4;PDK3;EP300;POLR2H;HRAS;H2AZ1;MYLIP;CREBBP;JUN;KDM4B;NCOR2;CDK9;TNRC6C;MOV10;ALDH1A3;PPP5C;AGO2;BCL2;FOSB;ZNF217;TNRC6B	30	260
R-HSA-69620	Cell Cycle Checkpoints	31/271	0.0107842	1.62467	7.35924	PSMD12;MRE11;PSMD14;NUP160;PPP2CA;ORC5;PSMB4;PSMB5;PSMD3;DYNC1I1;ANAPC7;RFC2;PPP2R5B;CDC7;PPP2R5D;RANGAP1;DYNC1LI1;CLIP1;KIF18A;WEE1;PSMA1;PSMC4;CCNE1;PSME3;PSME4;UBE2V2;NUP98;MCM6;MAD1L1;ITGB3BP;PAFAH1B1	31	271
R-HSA-69306	DNA Replication	20/155	0.0108475	1.86005	8.41453	H2AZ1;PRIM2;PSMD12;ANAPC7;PSMD14;RFC2;CDC7;ORC5;PSMB4;PSMB5;PSMA1;CCNE1;PSMC4;PSME3;PSMD3;PSME4;POLE3;KPNA6;MCM6;POLE	20	155
R-HSA-6781827	Transcription-Coupled Nucleotide Excision Repair (TC-NER)	12/77	0.0108873	2.31409	10.46	COPS3;CCNH;RFC2;POLR2B;POLR2C;POLE3;EP300;COPS7A;ERCC5;POLR2H;PRPF19;POLE	12	77
R-HSA-5610783	Degradation Of GLI2 By Proteasome	10/59	0.0109067	2.55684	11.5527	PSMD12;PSMB4;PSMB5;PSMA1;PSMD14;PSMC4;PSME3;PSMD3;PSME4;PRKACB	10	59
R-HSA-983189	Kinesins	8/42	0.0110042	2.94628	13.2862	KLC4;KIF18A;KIF9;KIF3B;KIF3A;KIF23;KLC1;KIFAP3	8	42
R-HSA-6814848	Glycerophospholipid Catabolism	3/7	0.0113706	9.37475	41.9681	GDE1;GDPD1;GDPD5	3	7
R-HSA-426496	Post-transcriptional Silencing By Small RNAs	3/7	0.0113706	9.37475	41.9681	TNRC6C;AGO2;TNRC6B	3	7
R-HSA-162906	HIV Infection	27/229	0.0114095	1.6801	7.51562	PSMD12;PSMD14;CCNH;RNMT;NUP160;PSMB4;PSMB5;POLR2B;POLR2C;PSMD3;AP2S1;POLR2H;AP2M1;NELFE;NUP214;NDC1;TAF13;RANGAP1;CDK9;PSMA1;PSMC4;PSME3;PSME4;PKN2;NUP98;SLC25A5;SLC25A4	27	229
R-HSA-349425	Autodegradation Of E3 Ubiquitin Ligase COP1	9/51	0.0118763	2.68387	11.8982	PSMD12;PSMB4;PSMB5;PSMA1;PSMD14;PSMC4;PSME3;PSMD3;PSME4	9	51
R-HSA-69601	Ubiquitin Mediated Degradation Of Phosphorylated Cdc25A	9/51	0.0118763	2.68387	11.8982	PSMD12;PSMB4;PSMB5;PSMA1;PSMD14;PSMC4;PSME3;PSMD3;PSME4	9	51
R-HSA-75815	Ubiquitin-dependent Degradation Of Cyclin D	9/51	0.0118763	2.68387	11.8982	PSMD12;PSMB4;PSMB5;PSMA1;PSMD14;PSMC4;PSME3;PSMD3;PSME4	9	51
R-HSA-180534	Vpu Mediated Degradation Of CD4	9/51	0.0118763	2.68387	11.8982	PSMD12;PSMB4;PSMB5;PSMA1;PSMD14;PSMC4;PSME3;PSMD3;PSME4	9	51
R-HSA-9759194	Nuclear Events Mediated By NFE2L2	12/78	0.0120234	2.2789	10.0748	UBL4A;PSMD12;PSMB4;CREBBP;PSMB5;PSMA1;PSMD14;PSMC4;PSME3;PSMD3;EP300;ATF4	12	78
R-HSA-5678895	Defective CFTR Causes Cystic Fibrosis	10/60	0.0122421	2.50556	11.0317	ERLEC1;PSMD12;PSMB4;PSMB5;PSMA1;PSMD14;PSMC4;PSME3;PSMD3;PSME4	10	60
R-HSA-8986944	Transcriptional Regulation By MECP2	10/60	0.0122421	2.50556	11.0317	NCOR2;TNRC6C;MOV10;RNMT;AGO2;SGK1;DLL1;CAMK2G;PVALB;TNRC6B	10	60
R-HSA-68949	Orc1 Removal From Chromatin	11/69	0.0122537	2.37655	10.4614	ORC5;PSMD12;PSMB4;PSMB5;PSMA1;PSMD14;PSMC4;PSME3;PSMD3;PSME4;MCM6	11	69
R-HSA-8939211	ESR-mediated Signaling	23/188	0.0123106	1.75087	7.69908	H2AZ1;DDX5;CREBBP;JUN;KDM4B;CBFB;CHD1;IGF1R;CDK9;TNRC6C;MOV10;PPP5C;POLR2B;AKT2;POLR2C;AGO2;BCL2;EP300;FOSB;ZNF217;POLR2H;HRAS;TNRC6B	23	188
R-HSA-9675108	Nervous System Development	55/545	0.012373	1.4159	6.21899	RET;RPL3;CLTC;CLTB;IRS2;MSI1;VLDLR;LAMC1;RND1;PPP3CB;DPYSL4;CHL1;VPS72;DPYSL3;PSMD3;PRKACB;HRAS;AP2M1;SCN1B;SCN1A;EPHA5;TRPC6;ANK1;GFRA2;GAP43;PSMA1;COL4A1;PSME3;SCN8A;PSME4;NUMB;MYH9;RPL28;EPHA3;PSMD12;PSMD14;RNMT;ROCK2;CUL2;CRMP1;PSMB4;PSMB5;FLRT3;AP2S1;HSPA8;EGR2;LIMK1;RPL23A;MAPK14;PSMC4;CNTN1;PKN2;SCN2A;SCN2B;FGFR1	55	545
R-HSA-202670	ERKs Are Inactivated	4/13	0.0125411	5.55766	24.3355	DUSP4;PPP2CA;PPP2R5D;DUSP7	4	13
R-HSA-109581	Apoptosis	22/178	0.0126506	1.77102	7.73944	BCAP31;PSMD12;PSMD14;BAD;CFLAR;MED12;OCLN;PSMB4;PSMB5;PSMA1;PSMC4;AKT2;PSME3;PSMD3;PSME4;LMNA;BCL2;ACIN1;PKN2;DNM1L;BCL2L1;PLEC	22	178
R-HSA-1296072	Voltage Gated Potassium Channels	8/43	0.012663	2.86194	12.504	KCNG2;KCNH4;KCNH5;KCND2;KCNS2;KCNA1;KCNS3;KCNA2	8	43
R-HSA-69002	DNA Replication Pre-Initiation	17/127	0.0127377	1.93903	8.46037	H2AZ1;PRIM2;PSMD12;ANAPC7;PSMD14;CDC7;ORC5;PSMB4;PSMB5;PSMA1;PSMC4;PSME3;PSMD3;POLE3;KPNA6;MCM6;POLE	17	127
R-HSA-72203	Processing Of Capped Intron-Containing Pre-mRNA	28/242	0.0128634	1.64468	7.1599	DDX5;HNRNPU;SNU13;PRPF19;NUP160;PQBP1;PTBP1;PCF11;POLR2B;POLR2C;POLR2H;NUP214;SRRM2;NDC1;CPSF4;HSPA8;SNRPN;FUS;U2SURP;SRRM1;LSM2;DDX39B;HNRNPA2B1;HNRNPD;NUP98;SNRNP25;SRSF5;SF1	28	242
R-HSA-8964043	Plasma Lipoprotein Clearance	7/35	0.0130466	3.12932	13.5788	CUBN;MYLIP;NCEH1;CLTC;AP2S1;VLDLR;AP2M1	7	35
R-HSA-72172	mRNA Splicing	23/189	0.013064	1.74023	7.54892	SRRM2;CPSF4;HSPA8;DDX5;SNRPN;FUS;HNRNPU;SNU13;PRPF19;U2SURP;SRRM1;LSM2;PQBP1;PTBP1;PCF11;POLR2B;POLR2C;HNRNPA2B1;HNRNPD;SNRNP25;SRSF5;POLR2H;SF1	23	189
R-HSA-5621575	CD209 (DC-SIGN) Signaling	5/20	0.013524	4.16971	17.9435	CREBBP;EP300;PKN2;HRAS;PRKACB	5	20
R-HSA-2028269	Signaling By Hippo	5/20	0.013524	4.16971	17.9435	LATS1;LATS2;WWC1;NPHP4;STK4	5	20
R-HSA-5696398	Nucleotide Excision Repair	15/108	0.013542	2.02277	8.70188	INO80D;CCNH;RFC2;COPS7A;RAD23A;PRPF19;COPS3;POLR2B;POLR2C;POLE3;UBE2V2;EP300;ERCC5;POLR2H;POLE	15	108
R-HSA-5607761	Dectin-1 Mediated Noncanonical NF-kB Signaling	10/61	0.0136969	2.4563	10.539	PSMD12;PSMB4;PSMB5;PSMA1;PSMD14;FBXW11;PSMC4;PSME3;PSMD3;PSME4	10	61
R-HSA-9612973	Autophagy	17/128	0.0137056	1.92146	8.24298	TOMM70;PRKN;HSPA8;BECN1;GABARAPL1;TOMM20;HDAC6;DYNC1LI1;RRAGA;PINK1;MAP1LC3A;RRAGC;ARL13B;MFN2;VDAC1;LAMTOR3;DYNC1I1	17	128
R-HSA-428157	Sphingolipid Metabolism	13/89	0.0139471	2.14426	9.16133	EGFL7;CERS6;CERK;PPM1L;SPHK2;SGPP1;SMPD2;NEU3;UGCG;SMPD4;ARSK;SPTSSB;ESYT1	13	89
R-HSA-9006936	Signaling By TGFB Family Members	16/119	0.0147587	1.94841	8.21436	TGIF1;TGFB2;SMURF2;LTBP4;CCNC;LTBP3;INHBA;MTMR4;UCHL5;CDK9;DRAP1;NCOR2;SKI;PARD6A;EP300;SKIL	16	119
R-HSA-389957	Prefoldin Mediated Transfer Of Substrate To CCT/TriC	6/28	0.0151036	3.4126	14.3084	CCT6A;TUBB2A;TUBB3;TUBB;CCT5;TUBA4A	6	28
R-HSA-72163	mRNA Splicing - Major Pathway	22/181	0.0151542	1.73732	7.27847	SRRM2;CPSF4;HSPA8;DDX5;SNRPN;FUS;HNRNPU;SNU13;PRPF19;U2SURP;SRRM1;LSM2;PQBP1;PTBP1;PCF11;POLR2B;POLR2C;HNRNPA2B1;HNRNPD;SRSF5;POLR2H;SF1	22	181
R-HSA-180585	Vif-mediated Degradation Of APOBEC3G	9/53	0.0151572	2.5616	10.7313	PSMD12;PSMB4;PSMB5;PSMA1;PSMD14;PSMC4;PSME3;PSMD3;PSME4	9	53
R-HSA-69052	Switching Of Origins To A Post-Replicative State	13/90	0.0152294	2.1163	8.85572	PSMD12;ANAPC7;PSMD14;ORC5;PSMB4;PSMB5;PSMA1;CCNE1;PSMC4;PSME3;PSMD3;PSME4;MCM6	13	90
R-HSA-69242	S Phase	20/161	0.0160245	1.78032	7.35918	PRIM2;PSMD12;ANAPC7;PSMD14;CCNH;RFC2;ORC5;PSMB4;WEE1;PSMB5;PSMA1;CCNE1;PSMC4;AKT2;PSME3;PSMD3;PSME4;POLE3;MCM6;POLE	20	161
R-HSA-1660662	Glycosphingolipid Metabolism	8/45	0.0165184	2.70695	11.1074	NEU3;SMPD2;UGCG;EGFL7;SMPD4;CERK;ARSK;ESYT1	8	45
R-HSA-69017	CDK-mediated Phosphorylation And Removal Of Cdc6	11/72	0.0165977	2.2593	9.25973	PSMD12;PSMB4;PSMB5;ANAPC7;PSMA1;PSMD14;CCNE1;PSMC4;PSME3;PSMD3;PSME4	11	72
R-HSA-8939902	Regulation Of RUNX2 Expression And Activity	11/72	0.0165977	2.2593	9.25973	PSMD12;PSMB4;PSMB5;PSMA1;CBFB;PSMD14;PSMC4;PSME3;PSMD3;PSME4;HIVEP3	11	72
R-HSA-6804115	TP53 Regulates Transcription Of Additional Cell Cycle Genes With Uncertain Roles In P53 Pathway	5/21	0.0166892	3.90889	15.9991	CNOT4;PLK3;CNOT6;RGCC;TNKS1BP1	5	21
R-HSA-8854050	FBXL7 Down-Regulates AURKA During Mitotic Entry And In Early Mitosis	9/54	0.017027	2.50454	10.2009	PSMD12;PSMB4;PSMB5;PSMA1;PSMD14;PSMC4;PSME3;PSMD3;PSME4	9	54
R-HSA-71406	Pyruvate Metabolism And Citric Acid (TCA) Cycle	9/54	0.017027	2.50454	10.2009	LDHA;SUCLA2;MDH2;MPC2;PDK4;PDK3;VDAC1;HAGH;IDH3A	9	54
R-HSA-174113	SCF-beta-TrCP Mediated Degradation Of Emi1	9/54	0.017027	2.50454	10.2009	PSMD12;PSMB4;PSMB5;PSMA1;PSMD14;PSMC4;PSME3;PSMD3;PSME4	9	54
R-HSA-68952	DNA Replication Initiation	3/8	0.0171985	7.49939	30.4695	PRIM2;POLE3;POLE	3	8
R-HSA-5632681	Ligand-receptor Interactions	3/8	0.0171985	7.49939	30.4695	SHH;BOC;GAS1	3	8
R-HSA-8951664	Neddylation	27/237	0.0173092	1.61539	6.55287	PSMD12;PSMD14;CUL2;ASB13;DCUN1D2;KLHL11;COPS7A;DCAF5;PSMB4;COMMD9;PSMB5;PSMD3;NAE1;FBXO9;FBXW4;FBXW11;FBXO17;FBXL15;KLHL42;COPS3;KBTBD6;PSMA1;PSMC4;PSME3;PSME4;ASB5;DTL	27	237
R-HSA-69202	Cyclin E Associated Events During G1/S Transition	12/82	0.0174978	2.14821	8.69099	PSMD12;PSMB4;WEE1;PSMB5;PSMA1;PSMD14;CCNH;CCNE1;PSMC4;AKT2;PSME3;PSMD3	12	82
R-HSA-1483255	PI Metabolism	12/82	0.0174978	2.14821	8.69099	FIG4;PLEKHA1;SYNJ1;SACM1L;GDE1;GDPD1;MTMR9;GDPD5;MTMR4;SBF2;MTMR6;MTMR7	12	82
R-HSA-9013424	RHOV GTPase Cycle	7/37	0.0175623	2.92038	11.8042	GIT2;PARD6A;PEAK1;DLG5;CLTC;WDR6;PKN2	7	37
R-HSA-418990	Adherens Junctions Interactions	6/29	0.0178787	3.26405	13.135	CDH6;CADM1;JUP;CADM2;CDH8;CDH18	6	29
R-HSA-445095	Interaction Between L1 And Ankyrins	6/29	0.0178787	3.26405	13.135	SCN8A;SCN2A;ANK1;SCN1B;SCN1A;SCN2B	6	29
R-HSA-166520	Signaling By NTRKs	17/132	0.0181641	1.85422	7.4323	DUSP4;EGR2;EGR4;CLTC;IRS2;PPP2R5D;MAPK14;DUSP7;PPP2CA;RIT2;AP2S1;EP300;FOSB;TRIB1;SGK1;HRAS;AP2M1	17	132
R-HSA-9007101	Rab Regulation Of Trafficking	16/122	0.0183686	1.89296	7.56638	TRAPPC3;RAB1A;RAB5B;RAB3A;TRAPPC1;GDI1;DENND2B;RAB39B;GGA3;AKT2;RAB12;TRAPPC13;RAB6A;SBF2;OPTN;RAB3GAP1	16	122
R-HSA-381038	XBP1(S) Activates Chaperone Genes	8/46	0.0187342	2.63557	10.4827	KLHDC3;EXTL2;SERP1;LMNA;CXXC1;PPP2R5B;DNAJB9;ATP6V0D1	8	46
R-HSA-373755	Semaphorin Interactions	10/64	0.0188396	2.31946	9.21244	DPYSL4;VPS72;RNMT;ROCK2;DPYSL3;LIMK1;MYH9;CRMP1;PKN2;RND1	10	64
R-HSA-9006925	Intracellular Signaling By Second Messengers	33/306	0.0196114	1.51978	5.97523	PSMD12;PSMD14;RNMT;IRS2;ADCY5;PPP2CA;PSMB4;PSMB5;FGF9;AKT2;PSMD3;PRKACB;CAMK2G;JUN;CBX4;BAD;PPP2R5B;WWP2;PPP2R5D;RNF146;TNRC6C;MOV10;RRAGA;PRKAR1B;RRAGC;PSMA1;PSMC4;PSME3;PSME4;AGO2;LAMTOR3;FGFR1;TNRC6B	33	306
R-HSA-141444	Unattached Kinetochores Signal Amplification Via A MAD2 Inhibitory Signal	13/93	0.0196183	2.03661	8.0065	PPP2R5B;PPP2R5D;RANGAP1;NUP160;PPP2CA;DYNC1LI1;CLIP1;KIF18A;NUP98;ITGB3BP;MAD1L1;DYNC1I1;PAFAH1B1	13	93
R-HSA-1980143	Signaling By NOTCH1	11/74	0.0200735	2.18734	8.5489	NCOR2;CREBBP;NUMB;CNTN1;EP300;CCNC;DTX4;HDAC8;DLL1;MAMLD1;HDAC6	11	74
R-HSA-68877	Mitotic Prometaphase	22/186	0.0201804	1.68389	6.57231	OFD1;DCTN2;ODF2;TUBB;PPP2R5B;PPP2R5D;RANGAP1;HDAC8;TUBA4A;NUP160;PPP2CA;DYNC1LI1;CLIP1;KIF18A;ACTR1A;NME7;CNTRL;NUP98;MAD1L1;ITGB3BP;DYNC1I1;PAFAH1B1	22	186
R-HSA-198753	ERK/MAPK Targets	5/22	0.0203098	3.67876	14.3348	DUSP4;PPP2CA;PPP2R5D;MAPK14;DUSP7	5	22
R-HSA-5357801	Programmed Cell Death	24/208	0.0207391	1.63776	6.34752	BCAP31;PSMD12;PSMD14;BAD;CFLAR;MED12;OCLN;PSMB4;PSMB5;PSMA1;PSMC4;AKT2;PSME3;PSMD3;PSME4;LMNA;BCL2;FLOT1;FLOT2;ACIN1;PKN2;DNM1L;BCL2L1;PLEC	24	208
R-HSA-6782135	Dual Incision In TC-NER	10/65	0.020833	2.27717	8.81541	CCNH;RFC2;POLR2B;POLR2C;POLE3;EP300;ERCC5;POLR2H;PRPF19;POLE	10	65
R-HSA-69563	p53-Dependent G1 DNA Damage Response	10/65	0.020833	2.27717	8.81541	PSMD12;PSMB4;PSMB5;PSMA1;PSMD14;CCNE1;PSMC4;PSME3;PSMD3;PSME4	10	65
R-HSA-69656	Cyclin A:Cdk2-associated Events At S Phase Entry	12/84	0.0208513	2.08832	8.08248	PSMD12;PSMB4;WEE1;PSMB5;PSMA1;PSMD14;CCNH;CCNE1;PSMC4;AKT2;PSME3;PSMD3	12	84
R-HSA-195253	Degradation Of Beta-Catenin By Destruction Complex	12/84	0.0208513	2.08832	8.08248	PPP2CA;PSMD12;PSMB4;PSMB5;PSMA1;PSMD14;PSMC4;PSME3;PSMD3;PSME4;PPP2R5B;PPP2R5D	12	84
R-HSA-381340	Transcriptional Regulation Of White Adipocyte Differentiation	12/84	0.0208513	2.08832	8.08248	MED12;NCOR2;MED14;CREBBP;EGR2;SMARCD3;KLF5;MED31;EP300;CCNC;MED28;MED13L	12	84
R-HSA-450282	MAPK Targets/ Nuclear Events Mediated By MAP Kinases	6/30	0.0209837	3.12788	12.0861	PPP2CA;DUSP4;JUN;PPP2R5D;MAPK14;DUSP7	6	30
R-HSA-168325	Viral Messenger RNA Synthesis	8/47	0.0211543	2.56785	9.90142	NDC1;NUP214;PBRM1;POLR2B;POLR2C;POLR2H;NUP98;NUP160	8	47
R-HSA-5099900	WNT5A-dependent Internalization Of FZD4	4/15	0.0212601	4.54668	17.5089	CLTC;CLTB;AP2S1;AP2M1	4	15
R-HSA-429914	Deadenylation-dependent mRNA Decay	9/56	0.0212625	2.39771	9.23312	EIF4A2;CNOT4;CNOT6;TUT7;PAN3;TUT4;LSM1;TNKS1BP1;LSM2	9	56
R-HSA-69541	Stabilization Of P53	9/56	0.0212625	2.39771	9.23312	PSMD12;PSMB4;PSMB5;PSMA1;PSMD14;PSMC4;PSME3;PSMD3;PSME4	9	56
R-HSA-1169091	Activation Of NF-kappaB In B Cells	10/66	0.0229758	2.23638	8.43858	PSMD12;PSMB4;PSMB5;PSMA1;PSMD14;FBXW11;PSMC4;PSME3;PSMD3;PSME4	10	66
R-HSA-381070	IRE1alpha Activates Chaperones	8/48	0.0237876	2.50352	9.35964	KLHDC3;EXTL2;SERP1;LMNA;CXXC1;PPP2R5B;DNAJB9;ATP6V0D1	8	48
R-HSA-111453	BH3-only Proteins Associate With And Inactivate Anti-Apoptotic BCL-2 Members	3/9	0.0243934	6.24916	23.2059	BAD;BCL2;BCL2L1	3	9
R-HSA-447041	CHL1 Interactions	3/9	0.0243934	6.24916	23.2059	HSPA8;CHL1;ANK1	3	9
R-HSA-196025	Formation Of Annular Gap Junctions	3/9	0.0243934	6.24916	23.2059	CLTC;CLTB;AP2M1	3	9
R-HSA-977347	Serine Biosynthesis	3/9	0.0243934	6.24916	23.2059	SERINC1;SERINC3;PSPH	3	9
R-HSA-389977	Post-chaperonin Tubulin Folding Pathway	5/23	0.0244072	3.47419	12.8993	TUBB2A;TUBB3;TUBB;TBCB;TUBA4A	5	23
R-HSA-70268	Pyruvate Metabolism	6/31	0.0244339	3.0026	11.145	LDHA;MPC2;PDK4;PDK3;VDAC1;HAGH	6	31
R-HSA-9022692	Regulation Of MECP2 Expression And Activity	6/31	0.0244339	3.0026	11.145	NCOR2;TNRC6C;MOV10;AGO2;CAMK2G;TNRC6B	6	31
R-HSA-2500257	Resolution Of Sister Chromatid Cohesion	14/106	0.0248509	1.90725	7.04701	PPP2R5B;PPP2R5D;RANGAP1;HDAC8;NUP160;PPP2CA;DYNC1LI1;CLIP1;KIF18A;NUP98;MAD1L1;ITGB3BP;DYNC1I1;PAFAH1B1	14	106
R-HSA-174154	APC/C:Cdc20 Mediated Degradation Of Securin	10/67	0.0252734	2.19703	8.08068	PSMD12;PSMB4;PSMB5;ANAPC7;PSMA1;PSMD14;PSMC4;PSME3;PSMD3;PSME4	10	67
R-HSA-69615	G1/S DNA Damage Checkpoints	10/67	0.0252734	2.19703	8.08068	PSMD12;PSMB4;PSMB5;PSMA1;PSMD14;CCNE1;PSMC4;PSME3;PSMD3;PSME4	10	67
R-HSA-5689880	Ub-specific Processing Proteases	23/201	0.0252837	1.62185	5.96449	TOMM70;BECN1;PSMD12;USP37;USP5;PSMD14;SMURF2;TRRAP;MAT2B;TOMM20;RNF146;PSMB4;H2AC25;PSMB5;PSMA1;PSMC4;PSME3;PTRH2;PSMD3;PSME4;FKBP8;VDAC2;VDAC1	23	201
R-HSA-351202	Metabolism Of Polyamines	9/58	0.026206	2.29959	8.37458	PSMD12;PSMB4;PSMB5;PSMA1;PSMD14;PSMC4;PSME3;PSMD3;PSME4	9	58
R-HSA-1257604	PIP3 Activates AKT Signaling	29/268	0.0262561	1.5242	5.54787	PSMD12;PSMD14;RNMT;IRS2;PPP2CA;PSMB4;PSMB5;FGF9;AKT2;PSMD3;JUN;CBX4;BAD;PPP2R5B;WWP2;PPP2R5D;RNF146;TNRC6C;MOV10;RRAGA;RRAGC;PSMA1;PSMC4;PSME3;PSME4;AGO2;LAMTOR3;FGFR1;TNRC6B	29	268
R-HSA-9614657	FOXO-mediated Transcription Of Cell Death Genes	4/16	0.0267194	4.16757	15.0965	CREBBP;PINK1;BCL6;EP300	4	16
R-HSA-8949664	Processing Of SMDT1	4/16	0.0267194	4.16757	15.0965	STOML2;PMPCB;MICU3;PHB2	4	16
R-HSA-9648025	EML4 And NUDC In Mitotic Spindle Formation	13/97	0.0268656	1.93921	7.01393	PPP2R5B;PPP2R5D;RANGAP1;NUP160;PPP2CA;DYNC1LI1;CLIP1;KIF18A;NUP98;MAD1L1;ITGB3BP;DYNC1I1;PAFAH1B1	13	97
R-HSA-68962	Activation Of Pre-Replicative Complex	6/32	0.0282432	2.88696	10.2975	ORC5;PRIM2;POLE3;CDC7;MCM6;POLE	6	32
R-HSA-2871837	FCERI Mediated NF-kB Activation	11/78	0.0285901	2.05631	7.30955	PSMD12;PSMB4;PSMB5;PSMA1;PSMD14;FBXW11;PSMC4;PSME3;PSMD3;PSME4;RASGRP2	11	78
R-HSA-1912422	Pre-NOTCH Expression And Processing	11/78	0.0285901	2.05631	7.30955	H2AZ1;TNRC6C;MOV10;CREBBP;JUN;B4GALT1;AGO2;EP300;RAB6A;MAMLD1;TNRC6B	11	78
R-HSA-917937	Iron Uptake And Transport	9/59	0.0289598	2.25348	7.98147	ATP6V1A;ATP6V0B;ATP6V1G1;ATP6AP1;ATP6V1B2;ATP6V1E1;ATP6V0D1;ATP6V1D;ATP6V1C1	9	59
R-HSA-9013406	RHOQ GTPase Cycle	9/59	0.0289598	2.25348	7.98147	CPNE8;GIT2;ARL13B;JUP;CDC42EP3;ARHGAP17;WWP2;PKN2;MPP7	9	59
R-HSA-187577	SCF(Skp2)-mediated Degradation Of P27/P21	9/59	0.0289598	2.25348	7.98147	PSMD12;PSMB4;PSMB5;PSMA1;PSMD14;CCNE1;PSMC4;PSME3;PSMD3	9	59
R-HSA-8852276	Role Of GTSE1 In G2/M Progression After G2 Checkpoint	9/59	0.0289598	2.25348	7.98147	PSMD12;PSMB4;PSMB5;PSMA1;PSMD14;PSMC4;PSME3;PSMD3;PSME4	9	59
R-HSA-9646399	Aggrephagy	5/24	0.0290001	3.29116	11.6522	PRKN;DYNC1LI1;ARL13B;HDAC6;DYNC1I1	5	24
R-HSA-180024	DARPP-32 Events	5/24	0.0290001	3.29116	11.6522	PPP2CA;PPP3CB;PRKAR1B;PPP2R5D;PRKACB	5	24
R-HSA-400685	Sema4D In Semaphorin Signaling	5/24	0.0290001	3.29116	11.6522	RNMT;ROCK2;LIMK1;MYH9;RND1	5	24
R-HSA-112310	Neurotransmitter Release Cycle	8/50	0.0297268	2.38405	8.38162	SNAP25;HSPA8;RAB3A;SYT1;DNAJC5;ARL6IP5;SLC1A3;CPLX1	8	50
R-HSA-9013026	RHOB GTPase Cycle	10/69	0.0303546	2.12232	7.41711	AKAP13;ARHGEF10;JUP;ROCK2;PCDH7;ARHGDIG;FLOT1;FLOT2;PKN2;ECT2	10	69
R-HSA-3247509	Chromatin Modifying Enzymes	26/238	0.0306273	1.53966	5.36706	KMT2E;KMT2D;SETD2;KDM3B;SMARCD3;TRRAP;KMT2C;EHMT1;DPY30;HDAC8;VPS72;SAP30L;EP300;KDM6B;ATF7IP;H2AZ1;CREBBP;PBRM1;KDM4B;DNMT3A;MSL2;ELP3;ARID1A;NCOR2;H2AC25;KANSL3	26	238
R-HSA-382551	Transport Of Small Molecules	66/706	0.0306315	1.30004	4.5316	CLTC;VLDLR;PHB2;RYR3;PSMD3;PMPCB;SLC39A8;ATP6V1E1;PRKACB;SLC12A7;AP2M1;CUBN;MYLIP;ATP6V1G1;ATP6V0B;TRPC6;ATP6AP1;NIPA1;SLC39A10;NIPA2;ATP1B1;SLC9B2;PRKAR1B;PSMA1;PSME3;PSME4;TRNP1;ATP6V1B2;VDAC2;VDAC1;MICU3;SLC29A1;SLC25A5;ATP6V0D1;SGK1;SLC25A4;SLC27A4;SLC22A4;ATP6V1A;PSMD12;STOML2;SLC35D1;PSMD14;SLC1A3;SLC7A2;ADCY5;ERLEC1;PSMB4;SLC25A29;PSMB5;PDZD11;AP2S1;SLC17A5;LRRC8C;SLC17A6;ATP9B;ATP6V1D;CAM…	66	706
R-HSA-5621481	C-type Lectin Receptors (CLRs)	17/141	0.0322053	1.7188	5.90516	PSMD12;CREBBP;PSMD14;FBXW11;NFATC1;PPP3CB;PSMB4;PSMB5;PSMA1;PSMC4;PSME3;PSMD3;PSME4;EP300;PKN2;PRKACB;HRAS	17	141
R-HSA-389958	Cooperation Of Prefoldin And TriC/CCT In Actin And Tubulin Folding	6/33	0.0324238	2.77988	9.53184	CCT6A;TUBB2A;TUBB3;TUBB;CCT5;TUBA4A	6	33
R-HSA-69618	Mitotic Spindle Checkpoint	14/110	0.0329094	1.82738	6.23868	ANAPC7;PPP2R5B;PPP2R5D;RANGAP1;NUP160;PPP2CA;DYNC1LI1;CLIP1;KIF18A;NUP98;MAD1L1;ITGB3BP;DYNC1I1;PAFAH1B1	14	110
R-HSA-264642	Acetylcholine Neurotransmitter Release Cycle	4/17	0.0329408	3.84678	13.1292	SNAP25;RAB3A;SYT1;CPLX1	4	17
R-HSA-432142	Platelet Sensitization By LDL	4/17	0.0329408	3.84678	13.1292	PPP2CA;PPP2R5B;PPP2R5D;MAPK14	4	17
R-HSA-190873	Gap Junction Degradation	3/10	0.0329586	5.35613	18.2778	CLTC;CLTB;AP2M1	3	10
R-HSA-6799198	Complex I Biogenesis	8/51	0.0330478	2.32848	7.93966	NDUFB9;NDUFA12;NDUFB5;NDUFAF7;NDUFC2;TMEM126B;NDUFAF1;ECSIT	8	51
R-HSA-9762114	GSK3B And BTRC:CUL1-mediated-degradation Of NFE2L2	8/51	0.0330478	2.32848	7.93966	PSMD12;PSMB4;PSMB5;PSMA1;PSMD14;PSMC4;PSME3;PSMD3	8	51
R-HSA-2173793	Transcriptional Activity Of SMAD2/SMAD3:SMAD4 Heterotrimer	8/51	0.0330478	2.32848	7.93966	TGIF1;NCOR2;CDK9;SKI;SMURF2;EP300;CCNC;SKIL	8	51
R-HSA-9013508	NOTCH3 Intracellular Domain Regulates Transcription	5/25	0.0341035	3.12644	10.5622	CREBBP;WWC1;FABP7;EP300;MAMLD1	5	25
R-HSA-983169	Class I MHC Mediated Antigen Processing And Presentation	38/378	0.0347651	1.40487	4.71914	PRKN;BECN1;PSMD12;SEC23A;PSMD14;RNF14;CUL2;ASB13;KLHL11;RNF115;PSMB4;RNF213;PSMB5;PSMD3;STX4;RBBP6;FBXO9;HERC6;FBXW4;MYLIP;ANAPC7;SMURF2;FBXW11;FBXO17;UBE2E2;FBXL15;PJA2;KLHL42;RNF126;KBTBD6;PSMA1;PSMC4;PSME3;PSME4;UBE2V2;UBE2O;TRIM37;ASB5	38	378
R-HSA-2682334	EPH-Ephrin Signaling	12/91	0.0363705	1.90255	6.30505	EPHA5;VPS72;ROCK2;CLTC;LIMK1;CLTB;AP2S1;MYH9;PKN2;HRAS;AP2M1;EPHA3	12	91
R-HSA-9013694	Signaling By NOTCH4	11/81	0.036488	1.96786	6.51513	PSMD12;PSMB4;CREBBP;PSMB5;PSMA1;PSMD14;PSMC4;PSME3;PSMD3;EP300;MAMLD1	11	81
R-HSA-6781823	Formation Of TC-NER Pre-Incision Complex	8/52	0.0366123	2.27544	7.52571	COPS3;CCNH;POLR2B;POLR2C;EP300;COPS7A;POLR2H;PRPF19	8	52
R-HSA-425397	Transport Of Vitamins, Nucleosides, And Related Molecules	7/43	0.0374547	2.43286	7.99103	SLC35D1;ARL2BP;PDZD11;SLC25A5;SLC29A1;SLC25A4;SLC27A4	7	43
R-HSA-1912408	Pre-NOTCH Transcription And Translation	9/62	0.038422	2.12558	6.92752	H2AZ1;TNRC6C;MOV10;CREBBP;JUN;AGO2;EP300;MAMLD1;TNRC6B	9	62
R-HSA-8873719	RAB Geranylgeranylation	9/62	0.038422	2.12558	6.92752	RAB2A;RAB3C;RAB1A;RAB5B;RAB3A;RAB37;RAB12;RAB39B;RAB6A	9	62
R-HSA-6796648	TP53 Regulates Transcription Of DNA Repair Genes	9/62	0.038422	2.12558	6.92752	CDK9;JUN;CCNH;POLR2B;POLR2C;PMS2;POLR2H;CDK12;NELFE	9	62
R-HSA-174184	Cdc20:Phospho-APC/C Mediated Degradation Of Cyclin A	10/72	0.0392653	2.0193	6.53732	PSMD12;PSMB4;PSMB5;ANAPC7;PSMA1;PSMD14;PSMC4;PSME3;PSMD3;PSME4	10	72
R-HSA-8964038	LDL Clearance	4/18	0.0399359	3.57181	11.503	NCEH1;CLTC;AP2S1;AP2M1	4	18
R-HSA-181430	Norepinephrine Neurotransmitter Release Cycle	4/18	0.0399359	3.57181	11.503	SNAP25;RAB3A;SYT1;CPLX1	4	18
R-HSA-181429	Serotonin Neurotransmitter Release Cycle	4/18	0.0399359	3.57181	11.503	SNAP25;RAB3A;SYT1;CPLX1	4	18
R-HSA-9604323	Negative Regulation Of NOTCH4 Signaling	8/53	0.0404266	2.22475	7.1376	PSMD12;PSMB4;PSMB5;PSMA1;PSMD14;PSMC4;PSME3;PSMD3	8	53
R-HSA-9706574	RHOBTB GTPase Cycle	6/35	0.0419391	2.58789	8.20758	CCT6A;DDX39B;ROCK2;RBBP6;MSI2;SRRM1	6	35
R-HSA-8939243	RUNX1 Interacts With Co-Factors Whose Precise Effect On RUNX1 Targets Is Not Known	6/35	0.0419391	2.58789	8.20758	PBRM1;SMARCD3;CBFB;CBX4;EP300;ARID1A	6	35
R-HSA-174084	Autodegradation Of Cdh1 By Cdh1:APC/C	9/63	0.0419941	2.0861	6.61342	PSMD12;PSMB4;PSMB5;ANAPC7;PSMA1;PSMD14;PSMC4;PSME3;PSMD3	9	63
R-HSA-174178	APC/C:Cdh1 Mediated Degradation Of Cdc20 And APC/C:Cdh1 Targets In Late Mitosis/Early G1	10/73	0.0425972	1.98714	6.27135	PSMD12;PSMB4;PSMB5;ANAPC7;PSMA1;PSMD14;PSMC4;PSME3;PSMD3;PSME4	10	73
R-HSA-179419	APC:Cdc20 Mediated Degradation Of Cell Cycle Proteins Before Cycle Checkpoint Satisfied	10/73	0.0425972	1.98714	6.27135	PSMD12;PSMB4;PSMB5;ANAPC7;PSMA1;PSMD14;PSMC4;PSME3;PSMD3;PSME4	10	73
R-HSA-9020702	Interleukin-1 Signaling	14/114	0.0427105	1.7539	5.53061	MAP2K4;PSMD12;PSMD14;FBXW11;PELI3;PSMB4;PSMB5;PSMA1;NKIRAS1;PSMC4;PSME3;PSMD3;PSME4;TIFA	14	114
R-HSA-556833	Metabolism Of Lipids	67/732	0.043086	1.26925	3.99122	ALAS1;CERK;FHL2;GDE1;CCNC;PLB1;OSBPL10;MED12;SMPD2;MED14;SMPD4;EP300;PRKACB;SBF2;CUBN;ACOT8;STARD4;EGFL7;ACOT7;CERS6;ELOVL4;HMGCS1;MIGA1;SPHK2;SACM1L;ACSL3;MED28;NCOR2;FAR2;SEC23A;SMARCD3;PPM1L;INSIG2;GDPD1;MTMR9;FITM2;NRF1;MTMR4;GDPD5;MTMR6;SELENOI;MTMR7;HSD11B1;NEU3;UGCG;MED31;ARSK;SC5D;SPTSSB;HMGCLL1;CHGA;CREBBP;CHKA;PLEKHA1;SRD5A1;DDHD2;DHCR24;SGPP1;MED13L;FIG4;FABP3;SYNJ1;FABP7;PPT1;ESYT1;GP…	67	732
R-HSA-112315	Transmission Across Chemical Synapses	26/246	0.0432813	1.48303	4.65676	GABRB2;SNAP25;RAB3A;RASGRF1;SLC1A3;CPLX1;NCALD;ADCY5;ARL6IP5;AP2S1;NPTN;NEFL;PRKACB;HRAS;CAMK2G;AP2M1;NSF;GABRA1;HSPA8;SYT1;KCNJ16;GABRG2;PRKAR1B;GLRB;DNAJC5;PLCB1	26	246
R-HSA-9013409	RHOJ GTPase Cycle	8/54	0.0444961	2.17627	6.77332	FMNL3;CPNE8;GIT2;ARL13B;JUP;WWP2;PKN2;MPP7	8	54
R-HSA-6782210	Gap-filling DNA Repair Synthesis And Ligation In TC-NER	9/64	0.045783	2.04806	6.3159	CCNH;RFC2;POLR2B;POLR2C;POLE3;EP300;POLR2H;PRPF19;POLE	9	64
R-HSA-114508	Effects Of PIP2 Hydrolysis	5/27	0.0458854	2.84191	8.75765	DGKE;DGKD;TRPC6;RASGRP2;DGKI	5	27
R-HSA-77075	RNA Pol II CTD Phosphorylation And Interaction With CE	5/27	0.0458854	2.84191	8.75765	CCNH;RNMT;POLR2B;POLR2C;POLR2H	5	27
R-HSA-9029569	NR1H3 And NR1H2 Regulate Gene Expression Linked To Cholesterol Transport And Efflux	6/36	0.0472898	2.50149	7.63319	NCOR2;TNRC6C;MOV10;AGO2;EP300;TNRC6B	6	36
R-HSA-9013407	RHOH GTPase Cycle	6/36	0.0472898	2.50149	7.63319	JUP;ROCK2;RALGAPA1;ARHGDIG;CSK;PKN2	6	36
R-HSA-5627117	RHO GTPases Activate ROCKs	4/19	0.0477083	3.33351	10.1427	ROCK2;VPS72;LIMK1;MYH9	4	19
R-HSA-442982	Ras Activation Upon Ca2+ Influx Thru NMDA Receptor	4/19	0.0477083	3.33351	10.1427	RASGRF1;NEFL;CAMK2G;HRAS	4	19
R-HSA-1989781	PPARA Activates Gene Expression	14/116	0.0483141	1.71933	5.20962	CREBBP;ALAS1;SMARCD3;HMGCS1;FHL2;CCNC;NRF1;MED13L;MED28;MED12;NCOR2;MED14;MED31;EP300	14	116
R-HSA-202403	TCR Signaling	14/116	0.0483141	1.71933	5.20962	PSMD12;PSMD14;FBXW11;PTPRJ;PSMB4;PSMB5;PSMA1;PSMC4;PSME3;PSMD3;PSME4;LCP2;CSK;PKN2	14	116
R-HSA-176409	APC/C:Cdc20 Mediated Degradation Of Mitotic Proteins	10/75	0.0498268	1.92579	5.77583	PSMD12;PSMB4;PSMB5;ANAPC7;PSMA1;PSMD14;PSMC4;PSME3;PSMD3;PSME4	10	75
R-HSA-2995410	Nuclear Envelope (NE) Reassembly	10/75	0.0498268	1.92579	5.77583	NDC1;PPP2CA;TUBB2A;TUBB3;TUBB;LMNA;NUP98;RANGAP1;TUBA4A;NUP160	10	75

## Sheet: celltype.enrichment
set1_Name	set2_Name	Background	set1_size	set2_size	expected.overlap	actual.overlap	enrichment.foldchange	odds.ratio	FET_pvalue	intersects
FMT	Neurons	12106	339	5442	152.39	147	0.964628	0.9358	0.74255	ENSG00000154027,ENSG00000162627,ENSG00000116918,ENSG00000180287,ENSG00000083444,ENSG00000066322,ENSG00000143418,ENSG00000188643,ENSG00000162706,ENSG00000213088,ENSG00000116731,ENSG00000116473,ENSG00000116741,ENSG00000153237,ENSG00000091428,ENSG00000196872,ENSG00000178171,ENSG00000163482,ENSG00000003137,ENSG00000243147,ENSG00000180398,ENSG00000162998,ENSG00000153558,ENSG00000044524,ENSG00000163412…
FMT	Astrocyte	12106	339	1593	44.6082	49	1.09845	1.11869	0.25931	ENSG00000057252,ENSG00000188643,ENSG00000162461,ENSG00000116741,ENSG00000157856,ENSG00000091428,ENSG00000163482,ENSG00000003137,ENSG00000144468,ENSG00000243147,ENSG00000138496,ENSG00000163520,ENSG00000173402,ENSG00000158163,ENSG00000164035,ENSG00000186352,ENSG00000215217,ENSG00000113387,ENSG00000164292,ENSG00000155511,ENSG00000185305,ENSG00000145569,ENSG00000146072,ENSG00000172426,ENSG00000183166…
FMT	Oligodendrocyte	12106	339	2140	59.9257	76	1.26824	1.35844	0.0140292	ENSG00000154027,ENSG00000180287,ENSG00000117115,ENSG00000066322,ENSG00000143418,ENSG00000188643,ENSG00000143409,ENSG00000116473,ENSG00000116741,ENSG00000169504,ENSG00000091428,ENSG00000135926,ENSG00000180398,ENSG00000044524,ENSG00000173905,ENSG00000154928,ENSG00000169855,ENSG00000197894,ENSG00000044115,ENSG00000155511,ENSG00000185305,ENSG00000146072,ENSG00000078269,ENSG00000204580,ENSG00000137221…
FMT	Microglia	12106	339	1538	43.0681	58	1.34671	1.43461	0.0104789	ENSG00000154027,ENSG00000057252,ENSG00000180287,ENSG00000083444,ENSG00000123689,ENSG00000116741,ENSG00000186283,ENSG00000196872,ENSG00000135926,ENSG00000144648,ENSG00000158163,ENSG00000174145,ENSG00000109501,ENSG00000113387,ENSG00000155511,ENSG00000185305,ENSG00000145569,ENSG00000007944,ENSG00000078269,ENSG00000240065,ENSG00000204264,ENSG00000146192,ENSG00000164889,ENSG00000122574,ENSG00000102032…
FMT	Endothelial	12106	339	862	24.1383	35	1.44998	1.52295	0.0167774	ENSG00000188643,ENSG00000169504,ENSG00000135636,ENSG00000173905,ENSG00000144648,ENSG00000163520,ENSG00000109787,ENSG00000164035,ENSG00000186352,ENSG00000044115,ENSG00000157510,ENSG00000122008,ENSG00000025039,ENSG00000146192,ENSG00000106070,ENSG00000135046,ENSG00000106991,ENSG00000152558,ENSG00000174804,ENSG00000183908,ENSG00000110092,ENSG00000110400,ENSG00000185532,ENSG00000213928,ENSG00000182718…
CSDS	Neurons	12106	334	5442	150.143	159	1.05899	1.11597	0.175557	ENSG00000158292,ENSG00000183317,ENSG00000143013,ENSG00000137962,ENSG00000185946,ENSG00000134247,ENSG00000116962,ENSG00000162630,ENSG00000163399,ENSG00000162734,ENSG00000134207,ENSG00000163875,ENSG00000155380,ENSG00000180875,ENSG00000117643,ENSG00000116981,ENSG00000023902,ENSG00000060718,ENSG00000117152,ENSG00000198216,ENSG00000157851,ENSG00000168702,ENSG00000144331,ENSG00000144476,ENSG00000177519…
CSDS	Astrocyte	12106	334	1593	43.9503	43	0.978378	0.974495	0.587023	ENSG00000137962,ENSG00000162692,ENSG00000162630,ENSG00000182004,ENSG00000155380,ENSG00000137965,ENSG00000160678,ENSG00000134250,ENSG00000168702,ENSG00000163072,ENSG00000138413,ENSG00000144229,ENSG00000153253,ENSG00000154764,ENSG00000176597,ENSG00000144868,ENSG00000084093,ENSG00000213949,ENSG00000145934,ENSG00000196376,ENSG00000135318,ENSG00000076716,ENSG00000137573,ENSG00000183117,ENSG00000148123…
CSDS	Oligodendrocyte	12106	334	2140	59.0418	78	1.3211	1.43473	0.0045915	ENSG00000185946,ENSG00000163399,ENSG00000162734,ENSG00000155380,ENSG00000117643,ENSG00000160678,ENSG00000050628,ENSG00000060718,ENSG00000117152,ENSG00000198216,ENSG00000168702,ENSG00000144331,ENSG00000144229,ENSG00000153253,ENSG00000163939,ENSG00000044524,ENSG00000114450,ENSG00000144868,ENSG00000114115,ENSG00000002587,ENSG00000152784,ENSG00000164303,ENSG00000145242,ENSG00000159788,ENSG00000112902…
CSDS	Microglia	12106	334	1538	42.4328	53	1.24903	1.30653	0.049874	ENSG00000134207,ENSG00000023902,ENSG00000171819,ENSG00000198216,ENSG00000138449,ENSG00000121440,ENSG00000114450,ENSG00000144868,ENSG00000182179,ENSG00000114115,ENSG00000002587,ENSG00000172403,ENSG00000138653,ENSG00000109189,ENSG00000131711,ENSG00000170624,ENSG00000175471,ENSG00000196376,ENSG00000180354,ENSG00000091137,ENSG00000188153,ENSG00000130052,ENSG00000198846,ENSG00000155926,ENSG00000147655…
CSDS	Endothelial	12106	334	862	23.7823	40	1.68193	1.81225	0.000809001	ENSG00000137962,ENSG00000069702,ENSG00000116962,ENSG00000142910,ENSG00000155380,ENSG00000187608,ENSG00000144331,ENSG00000177519,ENSG00000138449,ENSG00000163072,ENSG00000138413,ENSG00000114115,ENSG00000159788,ENSG00000213949,ENSG00000131711,ENSG00000157510,ENSG00000137273,ENSG00000122585,ENSG00000128573,ENSG00000087842,ENSG00000130052,ENSG00000174417,ENSG00000156675,ENSG00000147862,ENSG00000129159…
CUMS	Neurons	12106	1535	5442	690.027	721	1.04489	1.09756	0.0472513	ENSG00000121769,ENSG00000158286,ENSG00000146463,ENSG00000121310,ENSG00000157193,ENSG00000132854,ENSG00000116133,ENSG00000065243,ENSG00000036549,ENSG00000171492,ENSG00000137962,ENSG00000116774,ENSG00000143458,ENSG00000163155,ENSG00000143198,ENSG00000075945,ENSG00000162694,ENSG00000118197,ENSG00000177807,ENSG00000162670,ENSG00000116962,ENSG00000162849,ENSG00000076356,ENSG00000054282,ENSG00000066557…
CUMS	Astrocyte	12106	1535	1593	201.987	227	1.12383	1.16947	0.0249788	ENSG00000171729,ENSG00000197921,ENSG00000116151,ENSG00000162618,ENSG00000137962,ENSG00000116774,ENSG00000143198,ENSG00000143171,ENSG00000177807,ENSG00000162849,ENSG00000142871,ENSG00000162642,ENSG00000160752,ENSG00000160781,ENSG00000117410,ENSG00000196517,ENSG00000177606,ENSG00000168653,ENSG00000073756,ENSG00000137942,ENSG00000116885,ENSG00000127603,ENSG00000185860,ENSG00000117594,ENSG00000162733…
CUMS	Oligodendrocyte	12106	1535	2140	271.345	269	0.991359	0.988015	0.578536	ENSG00000066056,ENSG00000157193,ENSG00000116133,ENSG00000036549,ENSG00000177807,ENSG00000197965,ENSG00000162670,ENSG00000162849,ENSG00000135828,ENSG00000162734,ENSG00000160752,ENSG00000179403,ENSG00000117410,ENSG00000169291,ENSG00000143799,ENSG00000132780,ENSG00000197147,ENSG00000143819,ENSG00000117616,ENSG00000180198,ENSG00000121904,ENSG00000182901,ENSG00000116455,ENSG00000069424,ENSG00000171793…
CUMS	Microglia	12106	1535	1538	195.013	209	1.07172	1.0961	0.134662	ENSG00000142655,ENSG00000158006,ENSG00000130766,ENSG00000116774,ENSG00000143171,ENSG00000133019,ENSG00000160781,ENSG00000196517,ENSG00000177606,ENSG00000197147,ENSG00000073756,ENSG00000143368,ENSG00000182901,ENSG00000162367,ENSG00000116455,ENSG00000185278,ENSG00000116701,ENSG00000160712,ENSG00000185630,ENSG00000131781,ENSG00000159388,ENSG00000159399,ENSG00000136732,ENSG00000196872,ENSG00000204262…
CUMS	Endothelial	12106	1535	862	109.299	141	1.29004	1.3818	0.000654578	ENSG00000066056,ENSG00000132854,ENSG00000162618,ENSG00000065243,ENSG00000137962,ENSG00000197965,ENSG00000116962,ENSG00000133019,ENSG00000142871,ENSG00000179403,ENSG00000177606,ENSG00000169291,ENSG00000132780,ENSG00000170385,ENSG00000143368,ENSG00000142798,ENSG00000127603,ENSG00000162591,ENSG00000120942,ENSG00000065526,ENSG00000159388,ENSG00000144331,ENSG00000163273,ENSG00000172059,ENSG00000115414…
MDD	Neurons	12106	1484	5442	667.101	767	1.14975	1.36074	1.65924e-08	ENSG00000011021,ENSG00000131697,ENSG00000175087,ENSG00000121769,ENSG00000116954,ENSG00000142686,ENSG00000121310,ENSG00000116704,ENSG00000116675,ENSG00000203965,ENSG00000188786,ENSG00000142949,ENSG00000116133,ENSG00000065243,ENSG00000058799,ENSG00000127124,ENSG00000188641,ENSG00000134253,ENSG00000183508,ENSG00000135862,ENSG00000143156,ENSG00000213064,ENSG00000075945,ENSG00000162694,ENSG00000143476…
MDD	Astrocyte	12106	1484	1593	195.276	204	1.04467	1.05941	0.248782	ENSG00000213064,ENSG00000092969,ENSG00000162630,ENSG00000142657,ENSG00000118733,ENSG00000171488,ENSG00000142871,ENSG00000117410,ENSG00000177606,ENSG00000097021,ENSG00000134376,ENSG00000198912,ENSG00000189171,ENSG00000133067,ENSG00000117036,ENSG00000014914,ENSG00000117114,ENSG00000134369,ENSG00000099260,ENSG00000031698,ENSG00000134222,ENSG00000117594,ENSG00000116729,ENSG00000196482,ENSG00000120942…
MDD	Oligodendrocyte	12106	1484	2140	262.329	256	0.975872	0.966867	0.688515	ENSG00000116675,ENSG00000116133,ENSG00000127124,ENSG00000188641,ENSG00000143476,ENSG00000163399,ENSG00000132718,ENSG00000162734,ENSG00000117410,ENSG00000025800,ENSG00000159164,ENSG00000162631,ENSG00000189171,ENSG00000169641,ENSG00000117713,ENSG00000122482,ENSG00000198892,ENSG00000134369,ENSG00000143153,ENSG00000134222,ENSG00000116560,ENSG00000196482,ENSG00000060718,ENSG00000163032,ENSG00000119801…
MDD	Microglia	12106	1484	1538	188.534	164	0.86987	0.836253	0.982624	ENSG00000131697,ENSG00000130766,ENSG00000116675,ENSG00000188641,ENSG00000213064,ENSG00000173726,ENSG00000173846,ENSG00000177301,ENSG00000177606,ENSG00000134376,ENSG00000121774,ENSG00000162631,ENSG00000117114,ENSG00000143153,ENSG00000134222,ENSG00000163032,ENSG00000072135,ENSG00000054219,ENSG00000174453,ENSG00000196950,ENSG00000115828,ENSG00000115234,ENSG00000172292,ENSG00000143970,ENSG00000136531…
MDD	Endothelial	12106	1484	862	105.667	84	0.794948	0.759194	0.992855	ENSG00000065243,ENSG00000069702,ENSG00000135862,ENSG00000132718,ENSG00000142871,ENSG00000177606,ENSG00000116750,ENSG00000189171,ENSG00000169641,ENSG00000142875,ENSG00000099260,ENSG00000120942,ENSG00000065526,ENSG00000158747,ENSG00000144331,ENSG00000196950,ENSG00000163171,ENSG00000153208,ENSG00000138069,ENSG00000182247,ENSG00000031081,ENSG00000023330,ENSG00000114115,ENSG00000138821,ENSG00000145390…
