# Supplementary material for: Systematical comparison reveals distinct brain transcriptomic features in models of depression induced by gut microbiota dysbiosis and chronic stress
Source: Research Square preprint supplement (doi:10.21203/rs.3.rs-4134877/v1), 2024-03-29
Supplement: Supplementary file 5 [file 8942ca60e78f2244d7a105de.xlsx]

## Sheet: FMT
ID	logFC	AveExpr	t	P.Value	B
ENSG00000154027	0.257955	7.24016	2.19014	0.0479173	-3.97495
ENSG00000137936	0.341655	3.83597	2.61932	0.0216269	-4.05122
ENSG00000162627	0.536623	3.84921	4.02568	0.00152188	-3.58706
ENSG00000058085	-0.663353	2.92513	-2.42457	0.0313684	-4.2393
ENSG00000057252	-0.250416	5.52365	-2.49899	0.0270977	-3.8327
ENSG00000116918	0.254993	7.84251	2.24836	0.0430864	-3.93897
ENSG00000180287	0.725494	1.59389	2.32584	0.0373694	-4.42654
ENSG00000162639	-1.02125	-0.183908	-2.36988	0.0344494	-4.50858
ENSG00000116690	-1.55388	1.60128	-2.30821	0.0429494	-4.41891
ENSG00000083444	-0.389185	4.78147	-2.7869	0.0157646	-3.77635
ENSG00000117115	-0.708195	5.17613	-2.55006	0.027873	-3.88437
ENSG00000121957	-0.295583	4.11302	-2.3984	0.0326769	-4.07359
ENSG00000143748	0.433772	5.9595	3.57896	0.00350874	-3.16419
ENSG00000134248	0.592862	4.54549	2.9804	0.0111218	-3.75821
ENSG00000197852	0.484184	6.93706	3.26939	0.00640122	-3.28572
ENSG00000159588	-0.572594	1.62523	-2.36073	0.0350375	-4.41124
ENSG00000066322	-0.689642	3.90777	-2.65916	0.0207891	-4.0175
ENSG00000143418	-0.69905	5.79638	-2.39216	0.0376322	-3.92547
ENSG00000143479	0.602997	3.24341	2.57718	0.0234079	-4.17493
ENSG00000263528	-1.06236	-0.0389639	-3.23199	0.00677044	-4.44189
ENSG00000188643	-0.336687	5.85518	-2.26796	0.0416847	-3.9505
ENSG00000162706	0.255818	8.57846	2.47333	0.0284267	-3.79729
ENSG00000213088	0.763681	4.92155	5.4329	0.000126589	-2.74736
ENSG00000094963	1.6109	1.13673	3.94446	0.00176928	-4.32009
ENSG00000160685	-0.414331	4.43144	-2.51981	0.0260635	-3.96429
ENSG00000143409	-0.289886	4.89887	-2.27279	0.0411996	-4.02894
ENSG00000154451	-0.952191	2.4867	-3.36142	0.00529538	-4.11527
ENSG00000116731	0.21793	6.24148	2.67117	0.0196157	-3.67227
ENSG00000116473	-0.399937	5.71922	-2.34595	0.036558	-3.91562
ENSG00000123689	-0.435594	2.22626	-2.20143	0.0469422	-4.38296
ENSG00000162461	0.563861	2.33923	2.22842	0.0446867	-4.37756
ENSG00000116741	0.330504	5.48205	2.75056	0.016886	-3.6948
ENSG00000143816	0.326132	4.75511	2.9702	0.0111355	-3.69917
ENSG00000186283	-0.368766	3.24355	-2.31759	0.0379416	-4.23986
ENSG00000169504	-0.568104	6.51287	-2.32934	0.0408043	-3.91979
ENSG00000196975	-0.709385	2.36302	-3.3292	0.00562916	-4.1461
ENSG00000153237	0.293381	4.01775	2.41845	0.0314833	-4.09316
ENSG00000157856	0.643873	3.19848	2.38501	0.0337992	-4.23512
ENSG00000091428	-0.431134	9.33177	-2.39467	0.0336928	-3.86582
ENSG00000196872	0.374065	7.7432	2.71282	0.0181337	-3.6322
ENSG00000178171	0.319305	5.0657	2.72266	0.0178001	-3.76887
ENSG00000171848	-0.952571	0.338205	-2.55608	0.0243525	-4.46683
ENSG00000144306	-0.355635	4.82115	-2.45558	0.0293827	-3.93777
ENSG00000163482	-0.432649	2.36415	-2.34062	0.0363641	-4.34634
ENSG00000003137	-1.32081	1.75155	-2.78115	0.0168813	-4.32995
ENSG00000144468	-0.295833	3.33673	-2.19774	0.047259	-4.26609
ENSG00000144407	1.08982	0.787053	2.66992	0.0196619	-4.44565
ENSG00000138439	0.201986	6.41507	2.22354	0.0450863	-3.95746
ENSG00000135926	-0.632653	5.19775	-2.2788	0.0446913	-4.02328
ENSG00000091106	0.871714	0.914252	2.76025	0.0165797	-4.43459
ENSG00000243147	0.413699	4.20981	3.11122	0.00851749	-3.77887
ENSG00000180398	0.272118	5.77285	2.68203	0.0192181	-3.70036
ENSG00000135636	0.62009	2.45295	2.86865	0.0135028	-4.24291
ENSG00000170144	-0.329156	6.55853	-2.72068	0.0178666	-3.62593
ENSG00000162998	0.673468	4.44598	4.63896	0.000499288	-3.17047
ENSG00000153558	0.200157	5.72044	2.35178	0.0356225	-3.9089
ENSG00000044524	0.608135	2.78301	2.56198	0.0240845	-4.25093
ENSG00000163412	0.338521	4.0294	2.67411	0.0195073	-3.99391
ENSG00000001617	-0.368321	3.47415	-2.40197	0.032461	-4.17555
ENSG00000173905	0.2356	5.18053	2.4407	0.0302075	-3.91216
ENSG00000161217	-0.246388	5.41929	-2.43181	0.0307114	-3.88119
ENSG00000136518	-0.312669	3.12429	-2.28788	0.0400733	-4.26364
ENSG00000144648	0.700544	2.49209	2.81518	0.0149426	-4.24638
ENSG00000114779	-0.444235	2.60678	-2.54245	0.0249821	-4.27074
ENSG00000156959	0.266134	7.05186	2.79635	0.0154852	-3.57375
ENSG00000154928	-0.324616	5.59737	-2.30036	0.0391647	-3.94641
ENSG00000136059	-2.86749	-0.0539668	-4.13206	0.00139892	-4.37839
ENSG00000229453	0.995087	0.138524	2.29813	0.0393254	-4.51132
ENSG00000169855	0.416245	5.16786	2.37521	0.0344149	-3.9526
ENSG00000196639	0.365227	4.13557	2.31663	0.0380088	-4.11816
ENSG00000138496	-0.701883	1.99082	-2.59303	0.0227218	-4.33833
ENSG00000163491	1.06333	0.871006	3.05925	0.00940188	-4.40861
ENSG00000163673	0.257361	5.08843	2.23882	0.0438445	-4.0307
ENSG00000163520	-0.532994	3.01875	-2.54494	0.0248659	-4.20487
ENSG00000157036	-0.384604	4.92258	-2.44536	0.0299469	-3.92737
ENSG00000173402	0.199001	6.87935	2.24433	0.0434048	-3.93871
ENSG00000163527	-0.240456	7.11409	-2.79717	0.0154612	-3.57272
ENSG00000158163	0.354109	4.75802	2.24807	0.0431095	-4.06871
ENSG00000180914	0.381267	2.70928	2.16708	0.0499678	-4.35271
ENSG00000179796	0.429896	3.4352	2.65739	0.0201315	-4.11236
ENSG00000168811	-0.708502	0.786201	-2.2508	0.0428945	-4.4767
ENSG00000109787	-0.322843	4.94974	-2.5917	0.0227787	-3.84953
ENSG00000145246	0.786804	2.54275	3.63479	0.00315837	-4.09931
ENSG00000138678	-0.552276	2.01094	-2.19071	0.0478676	-4.40582
ENSG00000164035	0.444955	3.44241	2.38177	0.0336996	-4.20802
ENSG00000174145	0.481729	5.91723	2.52547	0.0266908	-3.80424
ENSG00000173085	0.493669	6.12974	3.65651	0.00303185	-3.09461
ENSG00000137628	-1.26232	0.231133	-2.788	0.0157316	-4.45534
ENSG00000129187	0.847333	1.80098	3.03127	0.00991551	-4.31764
ENSG00000180801	1.26177	0.84851	2.54145	0.0251854	-4.45993
ENSG00000109501	0.683461	5.85118	2.39307	0.0372708	-3.92884
ENSG00000197894	-0.249506	5.43996	-2.18786	0.0481162	-4.02518
ENSG00000186352	0.614456	2.07899	2.79742	0.0154536	-4.31295
ENSG00000215217	0.32577	3.68562	2.52666	0.0257313	-4.10762
ENSG00000113387	0.376587	7.75437	3.98023	0.00165561	-2.87492
ENSG00000152413	-0.427573	7.78	-2.80127	0.0154988	-3.57961
ENSG00000082068	-0.427215	3.75482	-3.20267	0.0071584	-3.83601
ENSG00000164292	-0.328154	4.91334	-2.30514	0.0388219	-4.01063
ENSG00000044115	-0.207648	6.39553	-2.34958	0.0357671	-3.87394
ENSG00000157510	-0.255693	5.23337	-2.54392	0.0249137	-3.8377
ENSG00000123213	0.261591	5.25793	2.37627	0.0340448	-3.93956
ENSG00000155511	0.33313	8.07402	2.28146	0.0406537	-3.91927
ENSG00000164187	-0.336697	7.01217	-2.53393	0.0253838	-3.74582
ENSG00000122008	0.317654	3.75311	2.23191	0.0444021	-4.21039
ENSG00000185305	0.407776	5.05961	2.57037	0.0237087	-3.85722
ENSG00000113212	0.625751	1.97968	3.08408	0.00896842	-4.28256
ENSG00000205279	1.45205	0.991951	2.58441	0.0236762	-4.45343
ENSG00000113328	-0.279632	7.23138	-2.70143	0.0185278	-3.63603
ENSG00000155868	0.459323	3.06942	2.58108	0.0232371	-4.20646
ENSG00000145569	0.350401	4.54452	2.70255	0.0184886	-3.87379
ENSG00000188428	0.332763	4.06818	2.31145	0.0383734	-4.13306
ENSG00000007944	0.287731	4.24286	2.295	0.0395529	-4.10976
ENSG00000124721	2.17622	0.513761	3.51191	0.00415268	-4.41972
ENSG00000025039	0.285928	6.91494	2.37548	0.0340946	-3.85176
ENSG00000198729	0.32332	3.89031	2.22831	0.0446953	-4.18992
ENSG00000146072	-0.288289	6.44098	-3.08509	0.00895128	-3.39662
ENSG00000124767	0.617981	6.74155	2.37399	0.0381461	-3.89713
ENSG00000146453	0.907435	0.484068	2.31488	0.0381315	-4.4966
ENSG00000024862	0.321603	4.87122	3.23702	0.00670608	-3.54957
ENSG00000172426	0.537379	2.60934	2.33963	0.0364307	-4.32107
ENSG00000130368	0.517359	2.99439	2.22742	0.0447678	-4.3068
ENSG00000078269	-0.447798	6.62321	-4.80752	0.000370483	-2.47681
ENSG00000240065	-0.846543	1.02545	-2.48927	0.0275935	-4.44013
ENSG00000204580	-0.540278	6.19881	-2.50478	0.0288545	-3.80697
ENSG00000269964	1.18692	-0.798083	3.05933	0.00940053	-4.4969
ENSG00000146433	-0.353704	6.02034	-2.4823	0.0279787	-3.80293
ENSG00000204248	-0.614798	4.67065	-3.73998	0.00259183	-3.35537
ENSG00000204264	-0.725585	1.53411	-2.54094	0.025053	-4.38053
ENSG00000146192	-0.460898	3.02306	-2.22501	0.0449658	-4.29497
ENSG00000168394	-0.589237	2.17084	-3.02727	0.00999111	-4.2398
ENSG00000096092	0.301222	5.02865	2.24188	0.0436	-4.03644
ENSG00000137221	-0.554035	4.90399	-2.60612	0.0230064	-3.86204
ENSG00000204052	0.389624	5.2129	3.56498	0.00360251	-3.30721
ENSG00000146243	0.621398	3.55948	3.46554	0.00434732	-3.84825
ENSG00000106524	0.184348	5.61602	2.26892	0.0414929	-3.96726
ENSG00000106070	0.34082	5.53555	2.38988	0.0331972	-3.90527
ENSG00000183166	0.271268	7.64999	2.41835	0.0314892	-3.82538
ENSG00000170632	0.78809	4.342	2.75599	0.0182816	-3.94588
ENSG00000172331	-0.294716	5.88636	-2.17015	0.0496907	-4.00867
ENSG00000241127	0.901181	4.57384	3.16467	0.00884395	-3.73816
ENSG00000157240	0.561125	4.12846	2.21683	0.0466987	-4.17087
ENSG00000164889	-0.289711	4.95299	-2.32458	0.0374559	-3.99353
ENSG00000197150	-0.300941	5.57348	-2.27179	0.0412749	-3.96665
ENSG00000164638	0.575765	2.50302	2.63622	0.02095	-4.27741
ENSG00000161048	0.645428	4.15299	2.36696	0.0361229	-4.1148
ENSG00000122574	0.639289	7.13086	5.25804	0.000170001	-2.29614
ENSG00000105989	-0.948394	1.89484	-4.17901	0.00114724	-4.10097
ENSG00000222011	0.727124	4.05816	4.47435	0.000670514	-3.40044
ENSG00000130429	-0.483325	4.54421	-3.20334	0.00714918	-3.62446
ENSG00000091127	-0.362868	4.2989	-2.31945	0.0378118	-4.08335
ENSG00000147231	1.00137	0.359422	2.93369	0.0119351	-4.45539
ENSG00000056277	-0.430977	4.7762	-2.26375	0.0423975	-4.05436
ENSG00000130822	0.315599	5.59917	2.91076	0.012466	-3.58718
ENSG00000102032	0.585045	1.50926	2.47003	0.0286018	-4.41583
ENSG00000123575	0.286063	4.40176	2.2764	0.0409276	-4.09877
ENSG00000102359	-0.862669	0.200601	-2.18342	0.048506	-4.50241
ENSG00000076716	0.480669	3.00569	2.67172	0.0195952	-4.19234
ENSG00000184867	0.20084	6.43656	2.29182	0.0397849	-3.91236
ENSG00000130055	0.858406	1.34161	3.06693	0.00926565	-4.3669
ENSG00000165168	-1.07769	-0.609704	-2.58189	0.023202	-4.49721
ENSG00000061337	0.240224	6.63699	2.33857	0.0365022	-3.87852
ENSG00000197892	-0.545786	5.75349	-2.36571	0.0371197	-3.91845
ENSG00000240694	0.268714	5.83552	2.78228	0.015903	-3.63262
ENSG00000120963	-0.310623	7.74021	-2.72281	0.017795	-3.62593
ENSG00000168522	-0.246159	5.83485	-2.39876	0.0326552	-3.86714
ENSG00000185189	-0.320086	6.81072	-2.21013	0.0464219	-3.96285
ENSG00000168453	-0.535845	5.36871	-2.70746	0.0190879	-3.73687
ENSG00000104231	0.939958	3.99332	5.62676	9.17458e-05	-3.20032
ENSG00000169398	-0.301814	7.34762	-2.83929	0.0142755	-3.547
ENSG00000214050	0.448638	2.89045	2.28456	0.0403188	-4.30702
ENSG00000135052	0.403854	4.24949	2.45557	0.0293832	-4.04473
ENSG00000135046	-0.943485	0.760392	-2.98612	0.0108037	-4.40264
ENSG00000119509	0.373134	4.12776	2.51239	0.0264275	-4.04866
ENSG00000106771	0.454744	6.75223	3.90924	0.00188905	-2.9115
ENSG00000136830	-0.298647	5.37807	-2.19634	0.0473793	-4.02487
ENSG00000137098	1.03511	-0.25025	2.40847	0.0320722	-4.51698
ENSG00000137133	0.424831	3.50551	2.49535	0.027282	-4.15405
ENSG00000136895	-0.316118	7.21887	-2.16953	0.0499502	-3.9897
ENSG00000147912	0.352872	5.32119	2.84256	0.0141874	-3.66904
ENSG00000106991	-0.239341	5.60315	-2.18517	0.0483519	-4.0172
ENSG00000164946	0.554309	2.14774	2.39564	0.0328448	-4.37181
ENSG00000173258	0.412902	4.4076	2.58061	0.0232576	-3.95727
ENSG00000136870	0.593837	3.00625	3.44385	0.00452956	-4.01601
ENSG00000196358	0.317133	4.58636	2.99741	0.0105746	-3.72888
ENSG00000196422	0.26569	5.17989	2.42159	0.0313002	-3.91916
ENSG00000177125	0.307827	4.43342	2.40555	0.0322465	-4.03541
ENSG00000173227	-0.309382	4.67178	-2.28294	0.0404391	-4.04423
ENSG00000137672	0.703992	3.2178	3.06725	0.00926004	-4.03871
ENSG00000152558	-0.398742	4.62458	-2.38803	0.0333108	-4.00737
ENSG00000174804	0.43557	4.26068	2.56896	0.0237716	-3.9957
ENSG00000091664	-0.46907	4.60088	-2.46962	0.0289062	-3.96932
ENSG00000085117	-1.28531	3.99472	-2.61394	0.0276983	-4.06249
ENSG00000177830	0.347149	5.55181	3.53806	0.00379039	-3.24575
ENSG00000149269	-0.280469	9.09297	-2.20123	0.0469595	-3.98011
ENSG00000149577	-0.193469	6.4761	-2.50203	0.0269442	-3.77154
ENSG00000183908	-0.424186	4.60074	-2.22112	0.0456224	-4.09337
ENSG00000176485	-0.536407	5.15998	-2.35585	0.0371616	-3.97009
ENSG00000166387	-0.725966	3.0662	-2.21218	0.0471586	-4.29847
ENSG00000160584	-0.228301	7.21709	-2.4308	0.0307689	-3.81488
ENSG00000177106	-0.806686	1.01329	-2.73297	0.0174569	-4.40953
ENSG00000110756	-0.334649	4.32261	-2.45852	0.0292221	-4.01714
ENSG00000036672	0.269819	6.31034	2.74966	0.0169148	-3.61809
ENSG00000110092	-0.647501	4.51928	-2.49132	0.0294449	-3.98405
ENSG00000149716	0.332155	4.08337	2.81047	0.0150765	-3.92587
ENSG00000110400	-0.341481	5.76634	-2.83082	0.0145065	-3.60384
ENSG00000175104	-0.363333	4.64669	-2.60696	0.022135	-3.89009
ENSG00000185507	-0.943417	1.45489	-2.41821	0.0315815	-4.41222
ENSG00000110719	-0.37484	4.00993	-2.86396	0.0136233	-3.90536
ENSG00000185736	0.776538	4.76895	3.28897	0.00660366	-3.613
ENSG00000185532	0.586262	2.23979	2.17525	0.0492324	-4.40072
ENSG00000197748	-0.829227	1.35243	-2.42225	0.0312616	-4.42617
ENSG00000099282	-0.558963	4.57078	-2.34231	0.0376535	-4.04361
ENSG00000107959	0.32456	5.16851	2.99323	0.0106589	-3.6116
ENSG00000186862	-0.462241	2.82611	-2.35687	0.0352887	-4.28384
ENSG00000066468	-0.580621	5.66375	-2.34992	0.0388158	-3.94073
ENSG00000122367	-0.551565	2.66171	-2.57641	0.0234419	-4.25606
ENSG00000156042	0.997169	-0.562614	2.33413	0.0368022	-4.52879
ENSG00000165568	-0.512894	3.01306	-2.72978	0.0175624	-4.15051
ENSG00000130037	1.10657	1.0078	3.56793	0.00358256	-4.35941
ENSG00000179104	-0.359858	3.86849	-2.32611	0.0373507	-4.14343
ENSG00000171435	0.295984	6.02972	2.72072	0.0178654	-3.65561
ENSG00000198270	0.64639	1.31423	2.17174	0.0495469	-4.46552
ENSG00000127334	0.289544	6.31203	2.80463	0.0152441	-3.58449
ENSG00000166863	0.508075	2.77098	2.3156	0.0380811	-4.31182
ENSG00000166888	-0.378973	3.86093	-3.06202	0.00935258	-3.86566
ENSG00000010278	-0.545935	5.42723	-2.2756	0.0435401	-3.99761
ENSG00000111615	0.503707	4.88763	3.28558	0.00611516	-3.53048
ENSG00000111266	-0.516867	4.15854	-2.39535	0.0333294	-4.07307
ENSG00000181234	0.48113	2.73321	2.88006	0.0132137	-4.18433
ENSG00000135457	0.309621	4.4845	2.58422	0.0231007	-3.9437
ENSG00000089154	-0.321102	6.95031	-2.73429	0.0174132	-3.61369
ENSG00000179912	-0.337534	8.39293	-4.48649	0.000656015	-2.64085
ENSG00000011105	-0.370325	5.64997	-3.72089	0.00268637	-3.11529
ENSG00000111218	0.355499	6.31372	2.48908	0.0276565	-3.79036
ENSG00000132975	0.303471	3.80279	2.18304	0.0485396	-4.21564
ENSG00000120690	-0.47956	3.35737	-2.76168	0.0165348	-4.086
ENSG00000136155	0.873988	0.681321	2.46077	0.0291	-4.47551
ENSG00000102802	-0.521044	2.49008	-2.41565	0.0316475	-4.30777
ENSG00000136167	-0.525728	3.45659	-2.99592	0.0106045	-3.98479
ENSG00000165572	1.35875	-0.841539	2.76891	0.0163103	-4.50703
ENSG00000136153	0.353614	5.77875	3.2578	0.00644646	-3.36073
ENSG00000136110	-0.970363	-0.294928	-2.37231	0.034295	-4.51239
ENSG00000276644	0.658077	2.28625	3.02043	0.0101218	-4.2486
ENSG00000166091	-0.548099	5.63519	-2.87529	0.013949	-3.60944
ENSG00000129566	-0.38137	2.87843	-2.17938	0.048864	-4.32214
ENSG00000129472	0.463744	2.65124	2.36981	0.0344539	-4.31727
ENSG00000140090	0.433524	4.59421	2.66034	0.02002	-3.88842
ENSG00000139990	0.199589	6.75474	2.16788	0.0498958	-3.99006
ENSG00000227051	0.432934	6.94721	2.69053	0.0193065	-3.65438
ENSG00000183648	0.378055	4.2581	3.38326	0.00508053	-3.6515
ENSG00000126803	0.315475	5.22923	2.69701	0.0186831	-3.76075
ENSG00000256053	0.414018	3.97515	2.71048	0.0182142	-3.98733
ENSG00000139880	-0.358997	3.40021	-2.53447	0.0253584	-4.14755
ENSG00000119723	-0.331902	3.92348	-2.54999	0.0246318	-4.04118
ENSG00000213928	-0.52492	3.67028	-3.43987	0.00456377	-3.78381
ENSG00000100433	0.417269	3.25225	2.49791	0.0271523	-4.19821
ENSG00000188266	0.736192	1.7739	3.05903	0.00940592	-4.31774
ENSG00000073417	-0.984149	4.33128	-2.48935	0.0325763	-4.05076
ENSG00000173548	-0.715711	3.18926	-2.54828	0.0251814	-4.18189
ENSG00000182718	-0.497076	3.26369	-2.71167	0.0181733	-4.10068
ENSG00000090470	0.496231	5.11152	4.25746	0.000993761	-3.03405
ENSG00000103876	-0.521829	4.52568	-2.823	0.014877	-3.80908
ENSG00000172349	0.886497	1.54957	3.00642	0.010395	-4.3409
ENSG00000069956	-0.198492	6.72316	-2.29024	0.0399005	-3.90816
ENSG00000129009	-0.418582	3.85569	-2.29128	0.0398241	-4.14646
ENSG00000167930	-0.519406	4.30718	-2.3237	0.0382812	-4.08436
ENSG00000206053	-0.869685	2.29904	-3.70738	0.00275538	-4.10758
ENSG00000140807	-0.496595	4.16348	-3.18342	0.00742508	-3.73531
ENSG00000176715	0.352061	4.03942	2.76359	0.0164752	-3.95121
ENSG00000102967	0.377269	4.27776	2.97249	0.0110872	-3.81457
ENSG00000103154	0.377391	4.41356	2.325	0.0374273	-4.07341
ENSG00000168807	0.291007	4.79445	2.52074	0.0260179	-3.92349
ENSG00000141012	0.715716	2.65439	3.98774	0.0016327	-4.00801
ENSG00000167515	-0.400585	5.02847	-2.52544	0.0258133	-3.8703
ENSG00000181019	-0.680574	2.80812	-2.47088	0.0287674	-4.24855
ENSG00000102934	-0.707623	2.94851	-2.72134	0.0178762	-4.17161
ENSG00000142494	-1.7416	0.381078	-3.90069	0.00191938	-4.33494
ENSG00000173805	0.288606	6.33312	2.48761	0.0276794	-3.78965
ENSG00000186532	0.301278	3.92316	2.51615	0.0262424	-4.06824
ENSG00000121073	-0.222249	5.61981	-2.34649	0.0359719	-3.91537
ENSG00000068079	-0.624874	1.28094	-2.46534	0.028853	-4.41945
ENSG00000126351	0.21495	9.30125	2.22092	0.0453029	-3.96865
ENSG00000154914	0.74808	2.62568	3.32869	0.00563462	-4.12921
ENSG00000176170	-1.15432	1.29084	-2.54342	0.0255835	-4.3886
ENSG00000109099	-0.462714	4.76788	-2.71397	0.0181378	-3.81872
ENSG00000179148	0.631371	2.12309	2.76723	0.016362	-4.31307
ENSG00000108352	0.303687	7.52807	2.67144	0.0196059	-3.65733
ENSG00000136490	0.328935	5.91946	2.34328	0.036186	-3.90322
ENSG00000185262	0.352155	4.19212	2.46408	0.0289208	-4.0483
ENSG00000141560	0.253456	4.97352	2.29808	0.0393291	-4.0127
ENSG00000108839	0.996686	0.248707	2.47225	0.0284837	-4.49498
ENSG00000172809	0.527438	6.30046	3.05693	0.00985048	-3.44862
ENSG00000108679	-0.613177	3.2884	-3.61483	0.00327935	-3.83478
ENSG00000178502	0.525845	4.54269	3.09835	0.00872845	-3.69645
ENSG00000108641	0.500324	3.49049	2.49874	0.0271103	-4.16032
ENSG00000172992	-0.221744	5.01501	-2.18681	0.0482082	-4.06256
ENSG00000129250	-0.285465	7.15408	-2.20881	0.0463147	-3.96214
ENSG00000141349	0.244833	5.62457	2.45695	0.0293076	-3.85276
ENSG00000272636	0.507112	2.95985	2.3745	0.0341566	-4.26532
ENSG00000184922	-0.391489	6.833	-2.8142	0.0149882	-3.56283
ENSG00000275832	-0.34895	7.14411	-2.35678	0.0355243	-3.8662
ENSG00000006042	-0.98881	3.37584	-2.5521	0.0271941	-4.16445
ENSG00000173821	-0.483192	3.9556	-2.4809	0.0280278	-4.068
ENSG00000085415	0.226505	5.14806	2.2651	0.0417849	-4.0127
ENSG00000101230	0.579197	3.81486	3.37797	0.00513172	-3.79157
ENSG00000078804	-0.420072	8.05567	-2.32645	0.0382546	-3.89756
ENSG00000124225	0.22268	5.85944	2.17268	0.0494625	-4.01182
ENSG00000125850	0.307376	3.69781	2.38255	0.0336511	-4.15742
ENSG00000198026	-0.243802	4.75689	-2.29397	0.0396278	-4.03296
ENSG00000149600	0.245777	4.76857	2.69417	0.0187832	-3.83557
ENSG00000101265	-0.443703	6.19746	-3.04307	0.00978771	-3.43999
ENSG00000132623	1.20571	-0.301331	2.47077	0.0285624	-4.51542
ENSG00000100983	-0.358973	4.01094	-2.60872	0.0220618	-4.00574
ENSG00000089195	0.254475	4.72447	2.16959	0.0497406	-4.10783
ENSG00000176533	0.325644	6.49299	2.3534	0.0355422	-3.87371
ENSG00000130287	0.237411	7.87926	2.32853	0.0371845	-3.88604
ENSG00000105717	0.482348	3.26211	3.10516	0.0086162	-4.02571
ENSG00000080573	-0.777378	1.18621	-2.55888	0.0242252	-4.41702
ENSG00000104967	0.238109	6.34329	2.23616	0.0440586	-3.9519
ENSG00000129347	0.408463	3.09705	2.34186	0.0362812	-4.26223
ENSG00000167483	-0.591646	1.29487	-2.28691	0.0401452	-4.44538
ENSG00000161298	0.787011	3.23982	4.85056	0.000343504	-3.66906
ENSG00000213965	0.348614	5.88784	2.24694	0.0434457	-3.96733
ENSG00000129951	0.37318	5.47793	2.35976	0.0352807	-3.93165
ENSG00000130475	-0.26166	6.65651	-3.0008	0.0105067	-3.44331
ENSG00000099840	0.87056	3.7046	2.60825	0.02387	-4.11916
ENSG00000104856	-0.424142	2.41865	-2.37585	0.0340711	-4.32694
ENSG00000198355	-0.30464	5.82573	-2.251	0.0428784	-3.9609
ENSG00000100413	-0.46929	5.43187	-2.38189	0.0346996	-3.91819
ENSG00000100418	-0.413653	6.81655	-2.24719	0.0444215	-3.9463
ENSG00000100138	-0.339744	6.03587	-2.22426	0.0452788	-3.97029
ENSG00000167037	-0.291112	6.93591	-2.45365	0.0294884	-3.79946
ENSG00000215193	0.254523	3.97661	2.24099	0.0436716	-4.17061
ENSG00000242247	0.273179	4.59218	2.41648	0.0315985	-4.00104
ENSG00000177663	-0.334241	4.53441	-2.47581	0.0282951	-3.96965
ENSG00000187905	-0.950247	-0.158668	-2.48995	0.0275587	-4.4974
ENSG00000167065	0.61604	4.79511	2.81177	0.0156687	-3.80055
ENSG00000184979	-0.991429	0.357281	-2.64741	0.0205135	-4.46409
ENSG00000100097	-0.830753	3.86991	-3.23011	0.00721564	-3.78955

## Sheet: CSDS
ID	logFC	AveExpr	t	P.Value	B
ENSG00000158292	-0.37095	5.07619	-3.338	0.00563291	-3.15307
ENSG00000183317	-0.326666	6.69976	-2.71183	0.0183565	-3.47997
ENSG00000157184	-0.452964	2.04373	-2.47048	0.0288107	-4.22234
ENSG00000143013	-0.192401	9.26529	-2.25347	0.0429567	-3.80582
ENSG00000137962	0.302055	4.11799	2.57925	0.0235301	-3.80989
ENSG00000069702	0.531966	2.8484	2.31737	0.0382178	-4.14652
ENSG00000162692	0.305277	4.3194	2.50027	0.02726	-3.82132
ENSG00000185946	0.29407	4.82477	3.14904	0.00804699	-3.33195
ENSG00000134247	-0.345106	5.60637	-3.73952	0.00265347	-2.80596
ENSG00000116962	0.520759	2.77147	3.041	0.00986939	-3.8978
ENSG00000162630	0.219461	5.82163	2.62203	0.0217218	-3.57744
ENSG00000163399	-0.208675	10.3911	-2.18462	0.0486845	-3.84765
ENSG00000182004	-0.61728	3.88271	-4.50806	0.000652816	-2.96456
ENSG00000162734	0.196935	8.99561	2.18505	0.0486466	-3.86666
ENSG00000126091	-0.217484	5.35196	-2.21187	0.0463361	-3.91103
ENSG00000134207	0.438924	4.31118	2.4503	0.0299094	-3.85246
ENSG00000163875	0.195144	6.80805	2.35736	0.0355102	-3.75726
ENSG00000142910	-0.564949	2.38163	-2.47386	0.0286307	-4.17292
ENSG00000155380	0.452189	4.6272	3.31028	0.00593513	-3.26955
ENSG00000187608	-0.517314	0.858394	-2.19097	0.0481275	-4.40766
ENSG00000137965	-0.932362	-0.709114	-2.98684	0.0109328	-4.40489
ENSG00000180875	0.292667	4.68679	2.64286	0.0208914	-3.67712
ENSG00000117643	-0.203596	6.37744	-2.17798	0.0492728	-3.9031
ENSG00000160678	-0.33589	5.28863	-2.27427	0.0413562	-3.87009
ENSG00000134250	0.35125	4.08552	2.41515	0.0319195	-3.90676
ENSG00000050628	0.743198	2.04831	3.5051	0.0041134	-3.95281
ENSG00000117475	-0.185652	4.61878	-2.39981	0.0328375	-3.84399
ENSG00000225556	-0.655044	0.0272462	-2.23424	0.0444892	-4.44973
ENSG00000116981	0.589077	0.892911	2.22578	0.0451795	-4.39545
ENSG00000143365	-0.729	-0.201655	-2.19339	0.0479167	-4.46823
ENSG00000023902	-0.369503	5.26001	-2.91305	0.0125671	-3.41366
ENSG00000171819	1.05581	-1.33694	2.67467	0.0196823	-4.46356
ENSG00000060718	-0.408877	2.95334	-2.43103	0.0309956	-4.0936
ENSG00000117152	-0.300094	8.62109	-2.3356	0.0369602	-3.74763
ENSG00000198216	0.264496	8.46156	2.32578	0.0376328	-3.75907
ENSG00000157851	0.324576	5.50381	2.26376	0.0421579	-3.86529
ENSG00000049323	-0.33222	3.34354	-2.94894	0.0117439	-3.79143
ENSG00000162878	-0.327005	4.05403	-2.28719	0.0403903	-3.98194
ENSG00000150551	0.33337	5.80692	2.48735	0.0279223	-3.68095
ENSG00000168702	0.491413	5.37838	2.82926	0.0148935	-3.4697
ENSG00000144331	-0.35251	4.78692	-3.08385	0.00910178	-3.37036
ENSG00000144476	0.366257	2.95602	2.47539	0.0285493	-4.07514
ENSG00000177519	0.490513	5.81287	2.80487	0.0156556	-3.44967
ENSG00000138449	0.37195	2.97225	2.42697	0.0312294	-4.08777
ENSG00000163072	-0.540841	1.12766	-2.17806	0.0492663	-4.3917
ENSG00000138413	0.275597	5.03094	2.60992	0.0222193	-3.65453
ENSG00000138433	-0.243348	3.92501	-2.68393	0.0193433	-3.78846
ENSG00000134321	-0.529613	0.392838	-2.35615	0.0355896	-4.4142
ENSG00000163359	0.941565	1.2797	4.18182	0.00117491	-4.01573
ENSG00000013441	0.285825	6.70756	2.86615	0.0137296	-3.36029
ENSG00000144229	0.588845	1.80433	2.25616	0.0427464	-4.30936
ENSG00000115194	-0.365167	7.83719	-2.78425	0.0160201	-3.39856
ENSG00000115267	0.562724	1.9678	2.32964	0.0373665	-4.26421
ENSG00000152056	-0.815553	1.38853	-3.02333	0.0102044	-4.19654
ENSG00000162998	0.453314	3.61602	2.42648	0.0312578	-3.96897
ENSG00000153253	0.250235	5.69825	2.25793	0.0426085	-3.85985
ENSG00000154764	0.397692	3.65441	2.92649	0.0122523	-3.71123
ENSG00000163939	0.259486	5.45812	2.46282	0.0292231	-3.72062
ENSG00000121440	-0.37213	5.53504	-3.35764	0.00542823	-3.06822
ENSG00000044524	0.446187	2.48607	2.17464	0.0495721	-4.25841
ENSG00000163430	0.21772	4.63261	2.20652	0.0467886	-3.96823
ENSG00000155893	0.348309	3.75274	2.94148	0.0119105	-3.68332
ENSG00000176597	0.959949	-0.617468	3.1916	0.00742544	-4.39808
ENSG00000114450	0.334409	5.0672	2.90303	0.0128069	-3.45106
ENSG00000145014	-0.272299	6.72578	-2.3808	0.0340093	-3.73978
ENSG00000144868	-0.313278	4.25113	-2.38314	0.0338631	-3.90178
ENSG00000127241	0.270855	3.09231	2.24325	0.0437648	-4.1458
ENSG00000179097	0.606327	1.29084	2.90896	0.0126644	-4.23052
ENSG00000132170	-0.387081	2.73913	-2.58622	0.0232257	-4.0687
ENSG00000136059	-0.339697	3.68174	-2.35902	0.0354018	-4.0062
ENSG00000164082	-0.241605	7.03973	-2.19088	0.0481354	-3.88547
ENSG00000182179	-0.39448	2.04063	-2.29003	0.0401814	-4.27275
ENSG00000057019	-0.212869	4.89527	-2.27493	0.0413062	-3.90003
ENSG00000156990	0.615909	1.43137	3.93298	0.00185385	-4.00858
ENSG00000131386	-0.468084	1.5641	-2.55185	0.0247642	-4.26986
ENSG00000157093	-0.601726	1.2213	-2.56461	0.0241818	-4.30911
ENSG00000157014	0.414167	5.19031	3.53044	0.00392235	-3.0156
ENSG00000214021	-0.344451	4.45844	-2.54447	0.0251073	-3.77215
ENSG00000114115	-0.427036	3.54586	-2.37333	0.0344812	-4.02243
ENSG00000174839	0.173936	4.78209	2.22271	0.0454323	-3.94613
ENSG00000091490	-0.164097	6.33524	-2.19497	0.0477793	-3.89055
ENSG00000002587	-0.531865	4.48464	-2.61215	0.0224404	-3.72894
ENSG00000152784	-0.39219	5.45876	-2.2334	0.0448811	-3.89039
ENSG00000173376	0.454845	3.78581	2.6198	0.0218127	-3.85272
ENSG00000172403	0.559627	2.35269	2.71215	0.0183458	-4.0996
ENSG00000138653	0.916576	0.223238	3.13842	0.0082101	-4.32134
ENSG00000145358	-0.582019	4.17218	-2.26588	0.043202	-3.98952
ENSG00000121210	-0.263243	4.39224	-2.33734	0.0368419	-3.91268
ENSG00000164303	-0.937605	1.8993	-2.22528	0.0463749	-4.31022
ENSG00000150630	-0.389914	2.34433	-2.67373	0.0197172	-4.118
ENSG00000197410	0.782233	0.104599	2.52535	0.0260175	-4.41143
ENSG00000185149	0.588831	1.96833	2.4009	0.032771	-4.26221
ENSG00000084093	0.355926	2.31177	2.42948	0.031085	-4.19408
ENSG00000168743	-0.475302	4.69106	-2.21403	0.0470179	-3.96141
ENSG00000152785	0.4405	5.36085	2.31672	0.038812	-3.84174
ENSG00000145242	0.278652	6.64921	2.53178	0.0257078	-3.62238
ENSG00000164167	0.170413	5.04004	2.375	0.0343754	-3.81759
ENSG00000159788	0.315987	5.15412	2.84514	0.0142842	-3.47572
ENSG00000109189	0.348728	6.51828	3.15258	0.00799335	-3.1484
ENSG00000112902	0.331553	5.06474	2.74411	0.0172764	-3.55699
ENSG00000113100	0.273	4.11757	2.61209	0.0221295	-3.78916
ENSG00000213949	0.40869	2.90335	3.14396	0.00812463	-3.82698
ENSG00000145623	0.443307	1.54318	2.31504	0.0383814	-4.32644
ENSG00000131711	0.243136	9.86137	2.1819	0.048925	-3.85787
ENSG00000113657	0.347366	5.65487	3.49039	0.00422853	-2.96614
ENSG00000155858	-0.358112	4.89167	-3.0373	0.0099386	-3.38471
ENSG00000157510	-0.284916	4.78019	-2.72466	0.0179196	-3.6035
ENSG00000184845	0.47659	3.26238	2.23195	0.0446745	-4.12705
ENSG00000164466	0.192704	5.70991	2.47887	0.0283656	-3.69149
ENSG00000176018	0.31409	2.97615	2.19491	0.0477846	-4.18423
ENSG00000170624	0.902548	0.751512	2.98129	0.011048	-4.28669
ENSG00000175471	0.427941	5.59853	3.27507	0.00634278	-3.12168
ENSG00000145934	-0.197705	7.35781	-2.31857	0.038134	-3.78079
ENSG00000204767	0.737245	-0.165587	2.52102	0.0262281	-4.42388
ENSG00000170085	0.22059	3.97257	2.28227	0.0407558	-4.00015
ENSG00000170234	-0.341264	4.75713	-3.88536	0.00202431	-2.90392
ENSG00000168724	-0.406479	5.49877	-2.82221	0.014915	-3.45261
ENSG00000112977	-0.338216	2.649	-2.22387	0.0453368	-4.21646
ENSG00000137273	0.392658	2.18309	2.66735	0.0199542	-4.12812
ENSG00000153046	-0.378107	3.11221	-2.28019	0.0409107	-4.12937
ENSG00000146221	0.548432	1.0555	2.25369	0.0429399	-4.38238
ENSG00000146250	0.722886	2.51611	4.66884	0.000490991	-3.56079
ENSG00000112276	0.693098	0.670083	3.35972	0.00540707	-4.24599
ENSG00000111817	0.436739	2.38162	2.59056	0.0230383	-4.13598
ENSG00000146374	0.30184	3.33889	2.27493	0.0413065	-4.09476
ENSG00000154548	0.23321	4.62248	2.31801	0.0381731	-3.89821
ENSG00000196376	0.270053	6.57966	2.20674	0.0467702	-3.87854
ENSG00000203760	-0.347657	2.12187	-2.23067	0.0447786	-4.28192
ENSG00000124785	-0.341628	7.21391	-2.56247	0.0242786	-3.58831
ENSG00000135334	-0.183781	6.16034	-2.36601	0.0349489	-3.7608
ENSG00000180822	-0.40577	2.60964	-2.54912	0.0248906	-4.10967
ENSG00000112514	-0.392954	5.26043	-2.4064	0.0324403	-3.77664
ENSG00000204618	-0.518254	3.9457	-2.97434	0.0111939	-3.62054
ENSG00000135318	0.378286	1.71171	2.2345	0.0444677	-4.32791
ENSG00000112562	0.563117	4.22578	2.25395	0.0440537	-4.00321
ENSG00000091831	0.81723	1.73351	3.20266	0.00727188	-4.11126
ENSG00000111834	0.635817	1.23659	2.66181	0.0201627	-4.2873
ENSG00000153975	-0.238304	3.41745	-2.37446	0.0344096	-4.04398
ENSG00000122585	-0.393846	6.59059	-2.56704	0.0240723	-3.59507
ENSG00000070882	-0.322809	5.66127	-3.02534	0.0101658	-3.2893
ENSG00000105866	0.301992	4.28998	3.35917	0.00541264	-3.32548
ENSG00000180354	0.243179	7.36203	2.47904	0.0283568	-3.65276
ENSG00000214309	-0.396698	2.41823	-2.25178	0.0430892	-4.23396
ENSG00000106080	-0.300076	3.08721	-2.30732	0.038929	-4.12336
ENSG00000164597	0.329859	4.66051	2.929	0.0121944	-3.49565
ENSG00000122591	0.483816	4.14092	3.71081	0.00279928	-3.19791
ENSG00000164690	-0.439088	1.35309	-2.26851	0.0417939	-4.34674
ENSG00000153993	0.444619	2.61613	2.53262	0.0256675	-4.12049
ENSG00000164619	-0.367924	3.29482	-2.19181	0.0480541	-4.13961
ENSG00000086300	0.224635	6.93018	2.47163	0.0287491	-3.66541
ENSG00000091137	0.423315	3.44669	2.42313	0.0314521	-4.01636
ENSG00000128573	0.564389	2.84189	3.27003	0.0064034	-3.8123
ENSG00000087842	0.404888	2.58142	2.994	0.0107858	-3.96758
ENSG00000158813	0.452197	2.59228	2.81617	0.0150857	-4.01798
ENSG00000188153	0.339664	2.0248	2.42795	0.0311729	-4.2406
ENSG00000012211	-0.666477	1.86564	-2.34855	0.0360905	-4.27488
ENSG00000130962	-0.491783	2.49272	-2.70951	0.0184369	-4.07895
ENSG00000130052	-0.38569	5.65555	-2.99119	0.0108433	-3.31314
ENSG00000076716	0.372342	3.99667	2.32009	0.0380275	-3.9772
ENSG00000268089	0.796549	-0.37927	2.33129	0.0372538	-4.45624
ENSG00000147246	0.425359	4.0884	2.5658	0.0241282	-3.8265
ENSG00000125355	0.404071	3.70311	3.67708	0.00298104	-3.36994
ENSG00000137573	0.46707	4.09446	2.82093	0.014951	-3.67595
ENSG00000198846	0.336671	5.21945	2.7284	0.0177942	-3.5523
ENSG00000155926	0.538499	3.18084	2.79542	0.0156869	-3.90239
ENSG00000147655	0.433333	4.75651	2.65062	0.0205896	-3.6673
ENSG00000008513	0.373141	5.06431	2.7006	0.0187479	-3.58904
ENSG00000082556	0.426846	2.70556	3.14639	0.00808739	-3.88203
ENSG00000174417	0.798632	1.51227	2.67329	0.0197334	-4.25603
ENSG00000275074	-0.24327	5.74896	-2.63645	0.0211435	-3.56824
ENSG00000168453	-0.527638	4.95814	-2.64341	0.0213766	-3.64631
ENSG00000160957	-0.478945	1.6082	-2.33265	0.0371611	-4.31489
ENSG00000183117	0.267463	6.93454	2.51428	0.0265592	-3.63161
ENSG00000147606	0.787023	0.684443	2.44172	0.0303882	-4.37964
ENSG00000164823	0.247983	4.12973	2.58406	0.0233197	-3.80482
ENSG00000156675	0.529749	1.16272	3.01015	0.0104618	-4.22564
ENSG00000104549	0.247329	6.06417	2.39432	0.0331719	-3.74185
ENSG00000154188	0.755209	2.12688	2.92713	0.0122375	-4.08588
ENSG00000153714	-0.414762	3.74315	-2.65684	0.0203511	-3.83532
ENSG00000137106	-0.27272	4.98108	-2.62382	0.0216492	-3.64707
ENSG00000148057	-0.249552	4.10386	-2.3875	0.0335921	-3.91857
ENSG00000137054	-0.429634	2.8528	-2.88077	0.0133562	-3.94073
ENSG00000204291	-0.551764	2.52512	-2.79092	0.0158202	-4.04286
ENSG00000148123	0.480031	2.78546	2.95111	0.0116959	-3.9331
ENSG00000135002	0.187452	5.68034	2.35224	0.0358464	-3.78861
ENSG00000185585	0.591926	1.83738	2.2434	0.0437526	-4.30745
ENSG00000171159	-0.539758	7.35564	-2.88339	0.0137896	-3.34852
ENSG00000130653	-0.371872	4.33879	-2.64567	0.0207814	-3.72761
ENSG00000244187	-0.287812	4.10428	-2.30635	0.0389977	-3.96526
ENSG00000107186	0.209086	6.37037	2.32121	0.0379495	-3.79212
ENSG00000164946	0.490626	2.4295	2.27606	0.0412214	-4.23303
ENSG00000137100	-0.199353	6.48938	-2.30016	0.0394428	-3.80641
ENSG00000173258	0.438889	5.29211	2.32233	0.0383972	-3.84208
ENSG00000235453	-0.533019	0.0344186	-2.30524	0.0390776	-4.44139
ENSG00000147862	0.265293	6.15773	2.96126	0.0114738	-3.30413
ENSG00000122140	-0.217878	4.70018	-2.28142	0.0408191	-3.91311
ENSG00000170743	0.294626	3.10676	2.17605	0.0494458	-4.17415
ENSG00000262655	0.237935	6.6356	2.17592	0.0494571	-3.90181
ENSG00000129159	-0.173884	8.11582	-2.45504	0.0296476	-3.6582
ENSG00000133794	-0.253962	5.2373	-2.512	0.026672	-3.70226
ENSG00000166261	-0.387239	2.31012	-2.34965	0.0360179	-4.22508
ENSG00000137507	-0.429617	2.00533	-2.67338	0.0197301	-4.17285
ENSG00000175356	0.861137	0.995571	2.70565	0.018571	-4.30766
ENSG00000187486	-0.199203	5.9744	-2.22458	0.0452781	-3.87436
ENSG00000149554	-0.73516	0.468313	-2.46455	0.0291296	-4.39501
ENSG00000166833	-0.295708	6.63216	-3.11857	0.00852387	-3.17052
ENSG00000123901	-0.245355	4.95661	-2.66035	0.0202176	-3.6275
ENSG00000183020	0.192176	7.88148	2.34316	0.0364502	-3.75375
ENSG00000137726	0.355629	7.57999	2.63074	0.0213706	-3.52785
ENSG00000175352	0.28357	6.64755	3.14857	0.00805413	-3.14737
ENSG00000154146	-0.323477	11.0442	-2.7991	0.0155785	-3.29861
ENSG00000154134	-0.819776	4.85569	-2.4567	0.0338843	-3.83337
ENSG00000122863	-0.780317	1.63052	-2.24191	0.0438719	-4.3318
ENSG00000188316	-0.436312	2.03775	-2.44707	0.030089	-4.2326
ENSG00000173848	-0.353095	4.88693	-2.98223	0.0110284	-3.4187
ENSG00000148690	-0.339597	3.98872	-3.17195	0.0077062	-3.50989
ENSG00000166317	-0.782373	-0.694784	-2.18971	0.0482373	-4.48687
ENSG00000138182	0.818555	-0.321567	2.52835	0.0258727	-4.43402
ENSG00000107796	-0.986681	3.33314	-3.23853	0.00725728	-3.69376
ENSG00000148600	0.837136	1.53173	3.65994	0.00307797	-4.05937
ENSG00000043591	-0.277973	5.54189	-2.33332	0.0371148	-3.80951
ENSG00000165633	0.427363	1.53792	2.24562	0.0435763	-4.34116
ENSG00000151208	0.265366	5.62589	2.43461	0.0307909	-3.73035
ENSG00000139044	-0.657302	0.394172	-2.4768	0.0284749	-4.39178
ENSG00000153233	0.287816	4.39685	2.44477	0.0302173	-3.84233
ENSG00000111581	0.251561	4.07574	2.43162	0.0309622	-3.89714
ENSG00000136040	0.269639	6.12256	2.36644	0.0349215	-3.76198
ENSG00000111249	-0.224836	7.16995	-2.41323	0.0320333	-3.70808
ENSG00000240771	-0.239047	8.16519	-2.58907	0.0231022	-3.54868
ENSG00000010626	-0.545551	0.989077	-2.20355	0.0470411	-4.39766
ENSG00000111653	-0.76226	1.65312	-3.53985	0.00385368	-4.05449
ENSG00000139263	-0.556868	0.953281	-2.23559	0.0443796	-4.39256
ENSG00000161835	-0.223432	6.12458	-2.32386	0.0377657	-3.79429
ENSG00000198056	-0.410585	2.39915	-2.85893	0.0139179	-4.04563
ENSG00000184575	0.235123	6.68763	2.65084	0.0205811	-3.52811
ENSG00000127329	0.370317	4.9792	2.6122	0.0221251	-3.65722
ENSG00000072041	0.338992	5.55046	2.90289	0.0128103	-3.38994
ENSG00000165899	0.816198	0.293749	2.55663	0.0245443	-4.38989
ENSG00000139405	-0.222027	4.69581	-2.25356	0.0429496	-3.92981
ENSG00000089250	0.406578	5.852	2.30304	0.0396336	-3.82393
ENSG00000135124	-0.313522	3.92991	-2.96202	0.0114573	-3.63566
ENSG00000048540	0.374874	6.06231	3.19645	0.00735771	-3.13613
ENSG00000111602	-0.376289	2.64739	-2.19611	0.047681	-4.22572
ENSG00000151067	0.212366	6.77332	2.26606	0.0419809	-3.82979
ENSG00000076248	-0.606135	1.82838	-2.67921	0.0195153	-4.19656
ENSG00000111554	0.368753	2.95213	3.20865	0.00719013	-3.80739
ENSG00000132975	0.305513	3.76427	2.5345	0.0255778	-3.89102
ENSG00000102755	0.357727	5.58342	2.91561	0.0125066	-3.37671
ENSG00000122025	-0.363464	2.93093	-2.32761	0.0375066	-4.13772
ENSG00000005810	0.234281	8.65716	2.25246	0.043036	-3.81591
ENSG00000133116	0.672751	1.22132	2.53556	0.0255276	-4.30893
ENSG00000140044	-0.259927	5.38165	-2.26709	0.0419021	-3.86739
ENSG00000203485	-0.443169	7.08926	-2.51099	0.0271779	-3.63809
ENSG00000131979	-0.74723	0.144079	-2.32655	0.0375797	-4.43292
ENSG00000100578	0.308477	3.18827	2.94127	0.0119153	-3.83914
ENSG00000185100	-0.670901	4.21238	-2.74755	0.0179324	-3.70635
ENSG00000227051	0.493316	6.8923	2.98034	0.0112235	-3.27501
ENSG00000140092	-0.573624	1.90992	-2.27809	0.0410685	-4.28876
ENSG00000165821	0.178844	5.70612	2.2698	0.0416955	-3.84959
ENSG00000171877	-0.245774	5.51284	-2.40734	0.032384	-3.75636
ENSG00000183655	0.275815	3.54622	2.69238	0.0190392	-3.85913
ENSG00000254585	0.452145	0.851173	2.37919	0.0341106	-4.37662
ENSG00000235711	-0.462101	3.03193	-2.21245	0.0462877	-4.17041
ENSG00000138623	-0.280526	7.73706	-2.30273	0.0392577	-3.78778
ENSG00000152910	0.400937	4.85329	2.67145	0.0198014	-3.63445
ENSG00000103175	-0.43092	2.36356	-2.58913	0.0230999	-4.13778
ENSG00000103061	-0.212148	4.75491	-2.4209	0.0315821	-3.81387
ENSG00000103365	0.209516	5.32994	2.24069	0.0439693	-3.89176
ENSG00000166851	-0.574934	1.22231	-2.40688	0.032411	-4.33391
ENSG00000206053	-0.414762	1.99777	-2.37218	0.034554	-4.25555
ENSG00000205336	0.331767	6.15949	2.54316	0.0251685	-3.62461
ENSG00000135740	-0.363247	6.10681	-3.11761	0.0085393	-3.1894
ENSG00000103275	0.165633	6.88812	2.2319	0.0446789	-3.85513
ENSG00000198736	-0.331512	4.20957	-2.29248	0.0400017	-3.96054
ENSG00000174628	0.434125	2.16493	2.17398	0.0496316	-4.29338
ENSG00000159792	-0.295435	3.77107	-2.44813	0.0300299	-3.94264
ENSG00000213398	-0.525509	4.02752	-2.78067	0.0161285	-3.70962
ENSG00000158486	-1.46919	-0.883016	-2.72657	0.0178553	-4.44199
ENSG00000180185	-0.29272	4.34046	-2.4182	0.03174	-3.86544
ENSG00000276023	-0.245785	5.85873	-2.2963	0.0397227	-3.82299
ENSG00000131480	-0.41095	2.45587	-2.40436	0.0325628	-4.18763
ENSG00000108798	0.516799	0.788922	2.53363	0.0256191	-4.35395
ENSG00000154975	-0.209707	7.51038	-2.22015	0.0456443	-3.85726
ENSG00000181291	0.26845	3.76056	2.55959	0.0244092	-3.87941
ENSG00000123700	-0.422451	3.95507	-2.48611	0.0279867	-3.89062
ENSG00000177374	0.517405	2.08856	2.31258	0.0385548	-4.25559
ENSG00000141526	-0.581172	2.76453	-2.26281	0.0422313	-4.18485
ENSG00000166750	-0.423948	2.14977	-2.37667	0.0342693	-4.2337
ENSG00000170412	0.480948	1.52382	2.3501	0.0359878	-4.3126
ENSG00000167281	-0.22696	8.66007	-2.49927	0.0273108	-3.61197
ENSG00000171246	0.180818	8.77173	2.23267	0.0446161	-3.8304
ENSG00000136449	-0.510753	1.71286	-3.11523	0.00857781	-4.12523
ENSG00000006283	-0.240467	7.83555	-2.20582	0.0468484	-3.86519
ENSG00000161647	-0.294053	5.97491	-2.78817	0.0159025	-3.44135
ENSG00000181045	0.410433	2.59753	2.35571	0.0356183	-4.17468
ENSG00000120088	-0.316629	5.26932	-2.40282	0.0326554	-3.77778
ENSG00000154856	0.502433	4.48851	2.58121	0.0236721	-3.74727
ENSG00000082397	-0.26619	7.61113	-2.2074	0.0467143	-3.86626
ENSG00000171451	0.346816	4.2868	2.54965	0.024866	-3.79766
ENSG00000168502	-0.288857	7.22007	-3.57514	0.00360707	-2.81762
ENSG00000101624	-0.327955	2.67176	-2.80778	0.015326	-4.00456
ENSG00000171873	-0.382169	6.07669	-2.86939	0.013646	-3.3758
ENSG00000173404	-0.519598	3.60528	-2.85389	0.0140507	-3.75745
ENSG00000166619	0.1754	6.49497	2.27085	0.0416154	-3.82936
ENSG00000168734	-0.253726	6.87443	-2.42433	0.0313823	-3.70303
ENSG00000101335	-0.415353	3.70428	-2.30512	0.0390858	-4.02191
ENSG00000125869	-0.415255	7.67732	-2.49934	0.0275787	-3.6344
ENSG00000101188	0.564489	3.36705	2.71886	0.0181158	-3.89249
ENSG00000125843	-0.272148	4.36759	-2.26589	0.0419939	-3.95539
ENSG00000101040	-0.265748	7.57364	-2.46349	0.0291869	-3.66177
ENSG00000101391	0.375651	2.95031	2.37825	0.0341695	-4.11735
ENSG00000130589	-0.432288	3.04341	-2.76471	0.0166201	-3.94734
ENSG00000172264	0.384421	5.57	3.205	0.00723981	-3.17269
ENSG00000101353	-0.564349	0.351944	-2.43472	0.030785	-4.40669
ENSG00000176533	0.249318	6.73178	2.84744	0.0142226	-3.37412
ENSG00000196867	0.353863	3.63112	2.85351	0.0140609	-3.775
ENSG00000104983	-0.43222	4.03572	-2.59423	0.0228807	-3.81324
ENSG00000105559	-0.515247	2.25033	-2.5195	0.0263022	-4.17277
ENSG00000176920	0.581289	0.449678	2.44406	0.0302572	-4.39242
ENSG00000214456	-0.621177	0.340174	-2.24479	0.0436419	-4.43405
ENSG00000161270	-0.697449	1.50928	-3.18876	0.00746528	-4.14471
ENSG00000153885	-0.274779	4.22438	-2.72622	0.0178674	-3.69526
ENSG00000198046	0.264546	3.97892	2.52926	0.0258287	-3.85967
ENSG00000105048	-0.677685	0.33514	-2.68795	0.0191982	-4.36333
ENSG00000028277	0.227624	4.35286	2.19854	0.0474707	-4.0028
ENSG00000105088	-0.324704	7.5712	-2.82003	0.0149766	-3.37641
ENSG00000100346	-0.177468	7.29123	-2.38788	0.0335683	-3.72622
ENSG00000185838	0.373377	2.08348	2.41391	0.0319928	-4.22909
ENSG00000167077	-0.413465	3.44462	-3.2796	0.00628886	-3.62274
ENSG00000100116	0.331823	3.32889	2.40205	0.0327017	-4.03918
ENSG00000187905	-0.817733	0.51543	-2.73572	0.0175511	-4.34351
ENSG00000142149	-0.463907	5.10003	-2.26264	0.043082	-3.89935
ENSG00000154645	1.46807	-0.788411	3.35159	0.00549047	-4.39384
ENSG00000177692	0.303683	3.49713	2.50652	0.0269453	-3.96224

## Sheet: CUMS
ID	logFC	AveExpr	t	P.Value	B
ENSG00000142655	0.234122	4.04722	2.15239	0.0431006	-3.90074
ENSG00000171729	-0.587957	0.612327	-2.6287	0.0156641	-3.04081
ENSG00000197921	0.485097	1.96387	2.38634	0.0264669	-3.33653
ENSG00000158006	-0.336704	2.4919	-2.72784	0.0125775	-2.77263
ENSG00000130766	0.388656	2.3322	2.36929	0.0274426	-3.36867
ENSG00000121769	0.34955	6.17344	3.62601	0.00157504	-1.16615
ENSG00000273274	0.584171	2.35636	2.29658	0.0321202	-3.48621
ENSG00000158286	0.825644	1.06147	2.58059	0.0174073	-3.08738
ENSG00000146463	-0.13151	7.27307	-2.70323	0.013285	-3.20941
ENSG00000116151	0.310114	3.01515	2.7497	0.0119793	-2.74203
ENSG00000066056	-0.556469	2.129	-2.81982	0.0102372	-2.61832
ENSG00000121310	-0.271781	3.72587	-2.10687	0.0472766	-3.93947
ENSG00000163866	0.264076	4.53084	2.84496	0.00967388	-2.67707
ENSG00000162396	0.305909	2.70186	2.31183	0.0309801	-3.481
ENSG00000157193	-0.261096	6.32367	-2.97404	0.00721742	-2.58702
ENSG00000132854	0.936897	1.66917	3.44716	0.00240447	-1.64288
ENSG00000162618	-0.359012	4.76421	-2.16159	0.0434644	-4.00618
ENSG00000142892	0.138418	6.66868	2.22853	0.0368567	-4.07952
ENSG00000116133	-0.210425	5.76725	-2.74127	0.0122066	-3.0116
ENSG00000065243	-0.153215	6.67165	-2.42403	0.024423	-3.71961
ENSG00000036549	-0.177634	7.37628	-3.6629	0.00144293	-1.15006
ENSG00000171492	0.307124	4.17333	3.36297	0.00293083	-1.5963
ENSG00000137962	-0.424669	5.46263	-2.31019	0.0329305	-3.84458
ENSG00000116774	-0.274184	4.28996	-2.5754	0.0176061	-3.18149
ENSG00000143458	-0.386715	5.43331	-3.09817	0.00560296	-2.27351
ENSG00000163155	0.389017	2.35021	2.71247	0.013015	-2.80088
ENSG00000143158	0.285375	6.22865	3.4383	0.0024552	-1.58442
ENSG00000143198	0.232442	5.1351	2.89722	0.00859571	-2.63389
ENSG00000143179	0.299309	4.9324	2.49368	0.0210272	-3.40236
ENSG00000075945	0.102062	9.11061	2.24612	0.0355369	-4.20527
ENSG00000143171	-0.46596	2.71477	-2.51281	0.0201746	-3.15074
ENSG00000162694	0.183447	6.47881	2.45652	0.0227801	-3.64135
ENSG00000118197	0.322265	3.12079	3.13552	0.00497961	-2.02369
ENSG00000177807	-0.188349	5.44215	-2.18069	0.040676	-4.04601
ENSG00000197965	-0.398006	3.25248	-2.31759	0.0306075	-3.53171
ENSG00000162670	0.417998	5.65134	3.59867	0.00173679	-1.2165
ENSG00000121486	0.141649	5.18578	2.28494	0.0327758	-3.825
ENSG00000116962	-0.653811	3.13196	-2.538	0.0200191	-3.16242
ENSG00000162849	-0.376451	5.09237	-2.14979	0.0449775	-4.07056
ENSG00000203724	0.569181	1.95444	3.31719	0.00326273	-1.78695
ENSG00000116668	-0.282065	5.15343	-3.06832	0.00581472	-2.29123
ENSG00000143641	-0.801965	0.385072	-2.21647	0.0377872	-3.6219
ENSG00000135828	-0.352465	4.83576	-4.58654	0.000158485	1.01058
ENSG00000076356	0.223657	7.67447	2.41141	0.0252991	-3.81547
ENSG00000054282	-0.188255	5.93053	-2.868	0.00918353	-2.77492
ENSG00000066557	0.15611	5.44691	2.28028	0.0330968	-3.86796
ENSG00000169231	-0.327225	3.64235	-2.74289	0.0121625	-2.79648
ENSG00000132763	0.269738	3.8531	2.40808	0.0252694	-3.42925
ENSG00000133019	0.409014	5.76119	2.67808	0.014955	-3.17042
ENSG00000162734	-0.181269	8.61663	-3.13493	0.00498636	-2.37722
ENSG00000172456	0.203834	4.2908	2.25648	0.03478	-3.7601
ENSG00000160097	0.298284	4.67322	2.73131	0.0124805	-2.91353
ENSG00000188931	1.029	-0.648073	2.56045	0.0181902	-3.33568
ENSG00000130775	0.695785	-0.176437	2.11524	0.046483	-3.77969
ENSG00000117118	0.209199	6.70936	3.59872	0.00168039	-1.26174
ENSG00000142871	-1.65103	2.20332	-2.377	0.0301374	-3.41485
ENSG00000162642	-0.209026	4.75809	-2.76031	0.0116985	-2.87229
ENSG00000125945	0.330372	5.81696	3.55205	0.00187683	-1.30216
ENSG00000160752	-0.349322	3.80313	-2.64705	0.0150435	-2.98863
ENSG00000116874	0.2632	3.70139	2.08735	0.0491769	-3.95935
ENSG00000009780	0.143295	6.28293	2.57516	0.0176154	-3.39252
ENSG00000077254	-0.136328	7.38372	-3.26574	0.0036796	-2.02765
ENSG00000160781	0.89763	-0.0117299	2.26069	0.0344767	-3.59839
ENSG00000131238	0.163802	6.82539	2.90201	0.00850286	-2.77277
ENSG00000242485	0.202241	4.37305	2.3361	0.0294377	-3.62457
ENSG00000179403	-0.312993	3.51171	-2.38269	0.0266727	-3.44112
ENSG00000117410	-0.20934	5.98827	-3.43204	0.00249162	-1.57863
ENSG00000196517	-0.429388	3.43901	-3.28167	0.00354532	-1.73965
ENSG00000090621	0.244571	5.0377	3.18809	0.00440851	-2.02871
ENSG00000177606	-0.728891	5.45439	-2.91427	0.00970967	-2.73159
ENSG00000135870	-0.142284	7.02323	-2.28196	0.0329805	-4.01401
ENSG00000162755	0.408166	2.26054	2.76785	0.0115031	-2.70861
ENSG00000168653	0.2051	5.85549	2.72197	0.012743	-3.0627
ENSG00000169291	-0.444084	2.05612	-2.12395	0.045669	-3.74615
ENSG00000143799	0.153517	6.72585	2.73216	0.0124571	-3.11542
ENSG00000132780	-0.312694	5.83204	-3.24118	0.0038965	-1.97929
ENSG00000162426	0.238337	4.19008	2.21506	0.0378975	-3.8125
ENSG00000117245	0.272126	4.14277	2.43367	0.0239245	-3.41939
ENSG00000197147	0.252732	6.91968	2.69332	0.0136437	-3.20861
ENSG00000065135	-0.266193	5.8791	-3.51293	0.00205878	-1.39526
ENSG00000073756	-0.467501	4.88707	-2.23018	0.0387339	-3.90848
ENSG00000170385	-0.163423	6.39776	-2.11671	0.0463441	-4.25748
ENSG00000085831	0.625963	1.29286	3.44305	0.00242785	-1.72112
ENSG00000156875	-0.174459	5.95115	-2.6444	0.0151317	-3.22492
ENSG00000154511	0.266149	5.06858	3.10718	0.00531654	-2.19825
ENSG00000189410	0.187804	5.6149	2.23212	0.036584	-3.96668
ENSG00000178096	0.400445	2.30774	2.46916	0.022169	-3.20823
ENSG00000143368	0.324344	2.42717	2.08816	0.0490969	-3.81292
ENSG00000143819	0.321962	3.19699	2.13811	0.0443737	-3.80729
ENSG00000117616	0.18405	7.52499	2.12404	0.0456607	-4.33055
ENSG00000137942	-0.407508	8.58811	-5.62602	1.3692e-05	3.26673
ENSG00000168264	-0.168697	5.89152	-2.42506	0.0243692	-3.64638
ENSG00000154429	0.20408	6.35456	2.12255	0.0457988	-4.2401
ENSG00000143632	0.364945	2.39828	2.35712	0.0281587	-3.39199
ENSG00000197056	-0.326428	4.47593	-2.98101	0.00710346	-2.40606
ENSG00000197622	0.160241	5.09699	2.1932	0.0396435	-3.97661
ENSG00000160785	0.167486	6.42487	2.27439	0.0335063	-3.97303
ENSG00000197785	0.140381	5.29294	2.11953	0.0460805	-4.12989
ENSG00000152763	-0.362294	5.0769	-4.80142	9.49466e-05	1.48124
ENSG00000143815	-0.340059	4.21007	-2.54887	0.0186549	-3.21995
ENSG00000254685	-0.212543	5.56496	-2.43369	0.0239232	-3.59869
ENSG00000142798	-0.627054	1.40605	-2.24407	0.0356883	-3.5501
ENSG00000180198	0.347505	2.73729	2.78715	0.0110165	-2.66838
ENSG00000054116	0.237083	5.75338	3.24086	0.00389932	-1.97377
ENSG00000116885	0.21542	5.72855	2.71199	0.0130289	-3.07031
ENSG00000116898	0.360891	4.42596	3.48969	0.00217497	-1.34429
ENSG00000213088	0.487226	2.36095	2.72869	0.0125536	-2.77403
ENSG00000116350	-0.242441	4.68216	-2.23522	0.0363495	-3.85107
ENSG00000121904	-0.348249	6.1221	-2.46794	0.0232651	-3.61046
ENSG00000163344	-0.239417	5.08712	-3.08618	0.00558041	-2.24207
ENSG00000272031	0.338242	4.26978	2.36336	0.0278482	-3.5622
ENSG00000182901	0.287065	7.00501	3.0658	0.00589723	-2.44814
ENSG00000078618	-0.17471	7.50737	-2.72236	0.0127318	-3.1843
ENSG00000182134	-0.299011	5.0611	-2.84199	0.00973877	-2.74463
ENSG00000196189	-0.261608	4.76466	-2.30165	0.0316487	-3.74137
ENSG00000088280	-0.552451	1.40788	-2.65183	0.0148858	-2.9349
ENSG00000163462	-0.225429	4.48814	-2.16899	0.0416627	-3.93982
ENSG00000154451	-0.471761	1.58054	-2.0799	0.0499203	-3.78853
ENSG00000118194	0.46425	3.05093	2.13203	0.0452592	-3.80484
ENSG00000186364	0.465997	1.51858	2.27389	0.0335412	-3.50741
ENSG00000127603	-0.228219	10.4795	-2.5923	0.0171891	-3.60942
ENSG00000185860	-0.852472	2.45977	-3.88049	0.000859067	-0.660233
ENSG00000009307	0.137263	9.46914	2.38726	0.0264153	-3.95605
ENSG00000007923	0.128839	6.05167	2.14868	0.0434279	-4.16867
ENSG00000162367	-0.551818	0.357223	-2.24669	0.0354949	-3.57658
ENSG00000164002	-0.266295	3.60189	-2.94737	0.00766989	-2.40275
ENSG00000116455	0.139269	5.27435	2.25085	0.0351894	-3.89864
ENSG00000116459	0.169478	8.10124	2.44223	0.0234894	-3.7754
ENSG00000153936	0.165219	7.01729	2.27107	0.0337388	-4.03133
ENSG00000069424	0.248385	7.36961	3.34138	0.00308306	-1.8594
ENSG00000123472	0.241465	4.53136	2.68825	0.0137339	-2.99012
ENSG00000010803	-0.207502	4.96321	-2.72427	0.0126779	-2.96997
ENSG00000185278	-0.216103	6.18679	-2.82916	0.0100243	-2.87973
ENSG00000117594	0.431866	2.70136	2.69791	0.0134428	-2.82516
ENSG00000117598	0.145934	6.25287	2.82505	0.0101176	-2.89026
ENSG00000162733	-0.490134	4.51126	-2.30956	0.0328715	-3.72639
ENSG00000171793	0.154237	5.61613	2.11109	0.0468747	-4.18663
ENSG00000162591	0.981791	0.530474	3.54006	0.00193085	-1.79799
ENSG00000116663	0.323639	3.03364	2.25177	0.0351225	-3.60467
ENSG00000116701	-0.352401	2.51371	-2.79143	0.0109114	-2.6608
ENSG00000116717	-0.484076	2.65994	-2.50455	0.0205387	-3.1665
ENSG00000196482	0.697149	4.67793	5.80092	9.15404e-06	3.56266
ENSG00000159208	0.713094	4.16323	6.01123	5.66611e-06	3.87193
ENSG00000162576	-0.672031	1.41886	-2.20115	0.0391445	-3.61381
ENSG00000160712	0.434129	1.93737	2.38637	0.0264651	-3.33652
ENSG00000265491	0.234787	6.70178	2.71003	0.0130856	-3.15509
ENSG00000122432	-0.254592	3.48156	-2.19394	0.0395833	-3.7611
ENSG00000185630	-0.20809	8.09384	-3.11918	0.00517124	-2.38445
ENSG00000120942	-0.366898	2.30251	-2.51464	0.0200948	-3.1346
ENSG00000120948	-0.162907	8.34045	-2.2355	0.0363288	-4.18228
ENSG00000162616	-0.197084	7.16409	-2.40424	0.0254774	-3.79119
ENSG00000162402	-0.126209	7.72258	-2.26183	0.0343947	-4.09804
ENSG00000122417	-0.224152	5.15721	-2.6378	0.0153535	-3.16015
ENSG00000153187	-0.136714	9.78111	-2.45162	0.0230211	-3.84857
ENSG00000065526	-0.266817	5.89132	-2.51123	0.0203267	-3.4842
ENSG00000143858	1.60208	2.68268	4.20906	0.000526654	-0.265952
ENSG00000077522	0.229655	3.94828	2.41698	0.0247937	-3.4287
ENSG00000131781	-0.480992	0.838811	-2.56787	0.0178981	-3.10416
ENSG00000159388	-1.62136	4.9568	-2.6811	0.0167864	-3.15545
ENSG00000171853	0.152345	6.11292	2.25232	0.035082	-3.98984
ENSG00000162981	0.265413	5.87431	2.1322	0.0456037	-4.1882
ENSG00000176887	-0.468358	5.58473	-3.74517	0.00125964	-0.907718
ENSG00000068784	-0.175764	4.80904	-2.46348	0.0224416	-3.45433
ENSG00000119787	-0.182095	7.09965	-3.54089	0.00192709	-1.40814
ENSG00000143889	-0.276379	7.08237	-3.56952	0.0018008	-1.34539
ENSG00000143919	-0.455525	2.6851	-2.44852	0.0231748	-3.26558
ENSG00000075340	0.126063	8.33607	2.22819	0.0368826	-4.19802
ENSG00000159399	-0.376936	3.25853	-3.14956	0.00482045	-1.9968
ENSG00000115875	-0.185049	7.43376	-2.21022	0.0382779	-4.17006
ENSG00000135638	0.431583	2.65018	2.10425	0.0475277	-3.80825
ENSG00000135951	-0.320891	5.78756	-4.51762	0.00018687	0.843283
ENSG00000240857	0.198716	4.92329	2.32363	0.0302211	-3.72259
ENSG00000116096	-0.238539	4.36766	-2.71293	0.0130016	-2.92394
ENSG00000168702	-0.225473	9.21487	-3.41502	0.00259346	-1.78483
ENSG00000162989	0.263644	7.82992	4.2018	0.000398101	0.0528773
ENSG00000144278	0.199598	6.73548	2.43666	0.0237715	-3.70087
ENSG00000150540	0.230761	6.06083	2.11783	0.0465149	-4.22109
ENSG00000076003	-0.28649	3.91473	-2.9329	0.00792668	-2.45174
ENSG00000198612	0.122445	5.82722	2.13405	0.0447414	-4.17137
ENSG00000114948	0.214673	7.73245	2.36933	0.0275751	-3.89707
ENSG00000138411	0.496836	7.4178	4.79522	0.000108714	1.32337
ENSG00000144331	0.264239	3.86635	2.31912	0.0305093	-3.58816
ENSG00000170035	0.198485	6.67845	2.15728	0.0426746	-4.21733
ENSG00000136732	-0.530733	0.587675	-2.41686	0.0248	-3.33444
ENSG00000196872	0.321513	7.37774	3.90082	0.000818335	-0.614161
ENSG00000136560	0.177859	5.71842	2.50254	0.0206283	-3.48121
ENSG00000221823	0.163513	9.62582	2.12984	0.0451259	-4.44437
ENSG00000204262	-0.527492	3.23413	-2.49925	0.0212083	-3.22728
ENSG00000162976	-0.606483	3.55561	-3.59273	0.00171308	-1.11693
ENSG00000173166	-0.25404	6.83727	-3.22726	0.00402487	-2.08732
ENSG00000005448	0.337437	3.13214	2.47419	0.0219303	-3.2353
ENSG00000132323	-0.234995	5.9052	-3.81625	0.00100146	-0.726308
ENSG00000163273	0.329208	3.21073	2.83289	0.00994046	-2.59474
ENSG00000144036	-0.16555	7.38596	-3.05116	0.00604878	-2.49301
ENSG00000198925	0.204306	4.65286	2.49954	0.0207625	-3.36304
ENSG00000188542	0.304442	3.41747	2.82763	0.010059	-2.61402
ENSG00000014641	0.197066	9.0165	2.83997	0.00978317	-3.02675
ENSG00000119041	0.142141	6.31413	2.40964	0.0251856	-3.71516
ENSG00000197121	-0.1248	7.47873	-2.42709	0.0242636	-3.77039
ENSG00000144362	0.151448	5.16375	2.33009	0.0298128	-3.74157
ENSG00000130414	0.191097	7.36171	3.34933	0.00302611	-1.84364
ENSG00000134317	-0.217321	5.3945	-2.43626	0.023792	-3.57405
ENSG00000172059	-0.487253	3.80012	-3.06249	0.00592042	-2.19127
ENSG00000138430	0.167714	7.54367	3.25422	0.00377978	-2.06285
ENSG00000169599	0.267618	5.3017	3.73064	0.00122819	-0.879134
ENSG00000154518	0.146111	5.90143	2.30877	0.03118	-3.86103
ENSG00000115414	-0.511889	4.36723	-2.17626	0.0431844	-3.93981
ENSG00000077232	0.163304	7.1676	3.07726	0.00569623	-2.42819
ENSG00000134321	-0.542059	1.02612	-2.43829	0.023689	-3.27901
ENSG00000196843	-0.643307	3.06123	-2.47601	0.0227476	-3.25713
ENSG00000168758	-0.279299	3.27611	-2.17642	0.0410331	-3.76734
ENSG00000082898	-0.20209	8.21748	-3.09699	0.00544308	-2.44188
ENSG00000003393	-0.151546	6.0913	-2.24145	0.0358829	-4.00551
ENSG00000115137	0.120299	7.31429	2.42395	0.0244274	-3.76273
ENSG00000173559	-0.375756	5.47677	-3.87746	0.000865298	-0.567471
ENSG00000198380	-0.119017	7.143	-2.11915	0.0461157	-4.3152
ENSG00000168280	0.11707	10.5573	2.0915	0.0487672	-4.55438
ENSG00000115963	-0.336914	4.8242	-2.45665	0.0230873	-3.47313
ENSG00000115232	0.682789	5.38697	3.36855	0.00348498	-1.79761
ENSG00000144218	-0.190345	6.65085	-2.56352	0.0180687	-3.44675
ENSG00000128694	0.229784	4.52417	2.91356	0.00828296	-2.54195
ENSG00000157833	0.498183	1.91354	2.87428	0.00905387	-2.55262
ENSG00000162992	0.339973	3.34088	2.23102	0.0366672	-3.67197
ENSG00000030419	-0.425003	4.3134	-2.5158	0.0206098	-3.31193
ENSG00000144426	-0.203141	7.05557	-2.44175	0.0235136	-3.71454
ENSG00000115738	0.285588	6.76496	3.75285	0.0011649	-0.91801
ENSG00000134313	-0.123183	9.63385	-2.10804	0.0471657	-4.48239
ENSG00000183091	-0.639247	4.02306	-2.94086	0.00850165	-2.50039
ENSG00000013441	-0.235488	8.31351	-2.159	0.0434979	-4.32705
ENSG00000003402	-0.394399	5.81263	-3.17155	0.00479308	-2.15761
ENSG00000123636	-0.231417	6.72146	-2.60109	0.0166434	-3.37733
ENSG00000125629	-0.190691	5.45352	-2.3319	0.0296995	-3.77252
ENSG00000138080	-1.11396	0.851806	-3.0856	0.00571435	-2.32107
ENSG00000138073	-0.228279	5.17341	-2.36117	0.0279188	-3.68365
ENSG00000084774	0.197141	3.75922	2.09487	0.0484366	-3.95871
ENSG00000144152	-0.540606	0.90611	-2.59347	0.0169236	-3.06076
ENSG00000115295	0.138534	5.98993	2.13585	0.0445779	-4.1891
ENSG00000163466	0.17893	7.40065	3.46928	0.00228228	-1.58407
ENSG00000127838	0.261452	5.39541	2.65744	0.0147026	-3.14141
ENSG00000115486	-0.300371	4.46615	-3.49036	0.00217155	-1.34808
ENSG00000155636	-0.184463	5.4707	-2.61353	0.0161953	-3.23781
ENSG00000143870	-0.396713	7.4153	-3.92278	0.000826507	-0.612372
ENSG00000128683	0.158102	7.54068	2.09937	0.0479987	-4.37889
ENSG00000135622	-0.274814	4.21587	-2.35097	0.0285275	-3.58287
ENSG00000121964	0.23891	6.23802	3.62959	0.00156172	-1.16198
ENSG00000125611	0.590039	2.28581	3.90863	0.000803189	-0.685797
ENSG00000173163	-0.416095	3.46853	-4.18311	0.00041633	0.0801175
ENSG00000144136	-0.163051	7.4452	-2.42032	0.0246178	-3.77761
ENSG00000116005	0.133725	7.28955	2.41591	0.0248507	-3.77916
ENSG00000158019	0.241099	4.39559	2.52602	0.0196049	-3.28074
ENSG00000075426	-0.528249	4.97477	-2.82313	0.0111097	-2.82244
ENSG00000214694	-0.408664	1.40871	-2.26401	0.0342388	-3.52109
ENSG00000143933	0.210093	11.1282	2.34548	0.029188	-4.11649
ENSG00000176732	0.251855	3.51576	2.68078	0.0139631	-2.89623
ENSG00000198399	-0.112542	7.53284	-2.08724	0.049188	-4.39773
ENSG00000115306	-0.149696	11.0687	-2.74797	0.0120254	-3.30875
ENSG00000115310	0.251485	9.846	3.48602	0.00219388	-1.65788
ENSG00000144233	-0.290337	3.93792	-2.5538	0.0184556	-3.18464
ENSG00000063660	-0.178158	5.18166	-2.09187	0.0487309	-4.16382
ENSG00000153561	-0.119788	7.58381	-2.28382	0.0328529	-4.04698
ENSG00000134323	-0.378959	2.87622	-2.09117	0.0488002	-3.85456
ENSG00000118263	-0.223981	5.97757	-2.39914	0.0257558	-3.7024
ENSG00000115902	-0.168084	5.95878	-2.54564	0.0187867	-3.42142
ENSG00000138071	-0.1465	8.99269	-2.51422	0.0201132	-3.68613
ENSG00000055917	-0.122438	8.75387	-2.68365	0.0138746	-3.33297
ENSG00000128656	0.125913	9.83373	2.34219	0.0290613	-4.06152
ENSG00000154764	-0.317334	3.20227	-2.64839	0.0149991	-2.93758
ENSG00000144668	-0.293529	2.9092	-2.20677	0.0385512	-3.67636
ENSG00000134115	0.333929	5.78255	2.50974	0.0210259	-3.49745
ENSG00000088543	0.56365	1.39802	2.75326	0.0118842	-2.79103
ENSG00000170275	-0.594347	1.23684	-2.56654	0.01795	-3.07452
ENSG00000114480	0.277861	3.873	2.19744	0.0392994	-3.8021
ENSG00000163376	-0.207515	4.7343	-2.17599	0.0410699	-3.9614
ENSG00000168309	0.312026	8.09693	3.91646	0.000788297	-0.610792
ENSG00000044524	-0.353241	4.25143	-2.15514	0.0434511	-3.94158
ENSG00000154174	0.0982325	8.64988	2.27148	0.0337101	-4.13082
ENSG00000138468	-0.207441	6.2248	-3.1432	0.00489197	-2.22198
ENSG00000144810	-0.525901	1.76032	-2.84093	0.00976219	-2.60647
ENSG00000145050	-0.332469	5.58402	-4.74593	0.000108355	1.35782
ENSG00000174738	0.17427	7.8859	2.75742	0.0117744	-3.13878
ENSG00000206530	-0.454824	3.86822	-2.56648	0.0183341	-3.16492
ENSG00000163611	-0.227245	4.3389	-3.01854	0.00651892	-2.31617
ENSG00000185565	-0.234636	9.56689	-2.43274	0.0244368	-3.88253
ENSG00000114520	0.134508	6.13074	2.10155	0.0477884	-4.25737
ENSG00000157500	-0.157136	8.34259	-2.72557	0.0126411	-3.22657
ENSG00000065518	0.468243	5.52982	4.04568	0.000599225	-0.223453
ENSG00000114790	-0.344165	4.52054	-3.33319	0.00314282	-1.68395
ENSG00000173889	-0.170226	7.23181	-3.2357	0.00394647	-2.08841
ENSG00000155893	0.28764	3.95598	3.06423	0.00586967	-2.19014
ENSG00000163584	0.240036	4.93954	2.25199	0.0351062	-3.85373
ENSG00000163659	-0.646562	4.7261	-2.16428	0.0452251	-4.01355
ENSG00000175066	-0.343044	2.83122	-2.11801	0.0462228	-3.81544
ENSG00000145191	0.110797	6.03987	2.07979	0.0499312	-4.28516
ENSG00000186001	-0.161295	5.34422	-2.18769	0.040095	-4.02286
ENSG00000113916	0.341156	4.35801	2.35731	0.0283355	-3.5922
ENSG00000127249	-0.218399	3.65642	-2.12217	0.0458343	-3.90494
ENSG00000163577	0.233883	6.6368	2.91728	0.00821313	-2.73041
ENSG00000071794	-0.19504	6.4177	-2.28445	0.0328095	-3.95929
ENSG00000163902	-0.123604	7.08424	-2.29605	0.0320225	-3.98878
ENSG00000178467	0.190235	5.25595	3.02845	0.00637251	-2.37921
ENSG00000178057	0.268338	3.6757	3.18151	0.00447636	-1.94146
ENSG00000174748	0.217969	7.10422	2.37604	0.0271397	-3.84763
ENSG00000175193	0.209071	5.00891	2.9456	0.0077009	-2.52297
ENSG00000163660	-0.215013	6.26448	-2.87392	0.00906123	-2.79103
ENSG00000144959	0.266678	7.49392	5.30538	2.88755e-05	2.56946
ENSG00000144840	0.391685	3.54704	3.14246	0.00490025	-2.01408
ENSG00000175182	0.116493	8.04088	2.1943	0.0395545	-4.23537
ENSG00000171109	-0.129582	6.47764	-2.55109	0.0185649	-3.45497
ENSG00000114450	-0.205239	6.16088	-2.88987	0.0087401	-2.75043
ENSG00000196455	0.148892	5.63002	2.28173	0.0329964	-3.88511
ENSG00000017260	-0.119924	8.68525	-2.09051	0.0488648	-4.46045
ENSG00000163947	0.22824	6.33898	3.3411	0.00308505	-1.79705
ENSG00000091986	0.360135	3.82432	3.3098	0.0033197	-1.68907
ENSG00000145020	-0.191901	4.88285	-2.76174	0.0116612	-2.88415
ENSG00000173540	-0.321743	3.21406	-2.8037	0.0106151	-2.65279
ENSG00000168237	0.570093	2.06896	3.78275	0.00108477	-0.964897
ENSG00000175161	0.218446	8.5775	2.98074	0.00710777	-2.70998
ENSG00000188315	-0.72136	0.667759	-2.97421	0.00721451	-2.52376
ENSG00000221955	0.687499	-0.46988	2.09191	0.0487271	-3.82296
ENSG00000198836	0.110975	8.6798	2.5453	0.0188006	-3.60724
ENSG00000169282	-0.150762	7.15635	-2.1131	0.046685	-4.32946
ENSG00000183873	1.6252	0.0112643	2.97276	0.00762028	-2.75493
ENSG00000136521	0.189928	6.60261	3.10382	0.00535797	-2.33197
ENSG00000169379	-0.240258	4.52994	-2.55516	0.0184011	-3.24696
ENSG00000010282	0.627526	1.35997	2.76072	0.0116879	-2.7844
ENSG00000144648	1.17741	0.594041	3.46214	0.00232104	-1.91657
ENSG00000090520	-0.283081	6.47274	-3.7888	0.00106923	-0.820096
ENSG00000232112	0.258782	5.35856	2.71288	0.0130032	-3.03399
ENSG00000163964	0.210678	3.80276	2.19341	0.0396267	-3.79929
ENSG00000180044	0.318775	4.67878	2.70818	0.0131396	-2.96308
ENSG00000113812	0.145329	6.05327	2.50429	0.02055	-3.51268
ENSG00000114279	0.198466	8.40919	3.3585	0.00296174	-1.87851
ENSG00000114491	-0.217252	4.70611	-2.54466	0.0188265	-3.28632
ENSG00000163946	-0.279366	7.79092	-3.70516	0.00130497	-1.07696
ENSG00000168386	-0.589596	2.74548	-3.53136	0.00197104	-1.27578
ENSG00000169313	0.2334	5.71495	2.71723	0.012878	-3.06087
ENSG00000152580	0.341229	2.88751	2.25447	0.0349255	-3.58747
ENSG00000196220	-0.216568	7.84671	-2.35928	0.0282489	-3.92721
ENSG00000155903	-0.217008	6.9924	-3.86529	0.000890828	-0.678915
ENSG00000164054	0.204969	4.62246	2.25778	0.0346862	-3.80095
ENSG00000163882	0.268479	4.07378	2.24885	0.0353359	-3.73998
ENSG00000114770	-0.19585	8.02898	-3.76436	0.0011334	-0.952029
ENSG00000164077	-0.197502	3.79487	-2.57423	0.0176509	-3.12493
ENSG00000138496	-0.398159	2.42149	-2.08268	0.0496421	-3.83201
ENSG00000144559	0.220264	3.69649	2.08184	0.0497257	-3.96722
ENSG00000163673	0.269295	5.52753	2.19974	0.0395228	-4.02351
ENSG00000070087	0.11548	8.60175	2.30217	0.0316142	-4.06995
ENSG00000196542	1.04772	0.00945603	3.17404	0.00455461	-2.43252
ENSG00000163520	0.299987	2.41301	2.23376	0.0364595	-3.59061
ENSG00000144655	-0.766427	2.39199	-3.31406	0.00330246	-1.71961
ENSG00000131386	0.542808	1.59536	2.18198	0.0405682	-3.6396
ENSG00000072274	0.495944	8.05882	4.13796	0.000559241	-0.245891
ENSG00000114098	0.127318	7.16128	2.69112	0.0136466	-3.2298
ENSG00000058262	-0.233103	5.33288	-2.99316	0.00690883	-2.45981
ENSG00000144674	-0.2359	8.09324	-2.55022	0.0188208	-3.57119
ENSG00000114331	0.119304	7.77099	2.08906	0.0490077	-4.41094
ENSG00000016864	-0.215549	4.79259	-2.23964	0.036018	-3.85864
ENSG00000144647	0.18508	4.21566	2.30766	0.0312525	-3.65559
ENSG00000163812	0.248686	5.74261	4.08118	0.000531479	-0.127273
ENSG00000152952	-0.405862	4.25554	-2.88693	0.0088255	-2.57553
ENSG00000109667	0.515781	0.982534	2.09968	0.0479695	-3.75379
ENSG00000132405	-0.278106	5.37952	-2.80685	0.0105401	-2.8487
ENSG00000169744	-0.206348	7.26981	-2.29527	0.0321205	-4.00376
ENSG00000090989	0.150003	6.66804	2.94457	0.00771906	-2.6726
ENSG00000145247	0.189257	6.49348	2.49452	0.0209888	-3.56905
ENSG00000087008	0.177283	4.68647	2.08374	0.0495356	-4.11175
ENSG00000156140	-0.281941	4.06513	-2.32451	0.0301652	-3.61467
ENSG00000153064	-0.607645	1.27967	-3.76047	0.00114395	-1.15151
ENSG00000138777	0.242642	5.86849	2.99755	0.00683992	-2.49868
ENSG00000138653	1.71208	2.12215	3.21713	0.00497237	-2.08143
ENSG00000138814	0.198263	10.368	2.8499	0.0095665	-3.06795
ENSG00000109158	0.226261	7.59936	2.58639	0.01721	-3.46656
ENSG00000138641	0.169063	8.5049	2.2966	0.0319857	-4.07618
ENSG00000077684	0.20773	6.30248	3.56789	0.00180778	-1.30397
ENSG00000145423	1.13028	-0.665615	2.64514	0.0151071	-3.2451
ENSG00000071205	0.344565	6.12664	2.63599	0.0161128	-3.28202
ENSG00000174473	0.201432	5.32144	2.1982	0.039238	-3.99933
ENSG00000182552	0.216717	5.17506	2.37349	0.0271992	-3.66292
ENSG00000164168	0.181191	6.82478	3.0163	0.00655251	-2.53389
ENSG00000038295	0.665541	1.24614	2.92817	0.00801249	-2.53418
ENSG00000171509	-0.731565	6.19179	-2.67005	0.0165514	-3.2721
ENSG00000182168	-0.157089	6.77856	-2.27123	0.0337277	-4.01978
ENSG00000174145	-0.26359	7.02849	-2.13793	0.0456438	-4.28591
ENSG00000109390	0.252137	5.34738	2.68889	0.0137144	-3.07666
ENSG00000163453	-0.456122	3.30818	-3.96622	0.000699856	-0.369342
ENSG00000084093	-0.369505	3.55249	-2.20897	0.0384078	-3.75211
ENSG00000151834	-0.229576	6.58949	-2.18233	0.0409534	-4.17128
ENSG00000134851	0.256432	5.28571	3.821	0.000990178	-0.678316
ENSG00000150627	0.175549	6.66755	2.61051	0.016303	-3.35879
ENSG00000151790	1.29399	1.2214	5.7199	1.10265e-05	1.57882
ENSG00000128052	-0.665641	4.05412	-4.31492	0.000313662	0.381191
ENSG00000163297	-0.648219	1.63659	-3.6028	0.00166421	-1.32915
ENSG00000153012	0.358637	6.06209	3.05652	0.00616743	-2.40264
ENSG00000179387	-0.245011	5.63506	-3.99481	0.000653578	-0.316115
ENSG00000138794	-0.660335	1.50289	-3.54445	0.00191091	-1.44744
ENSG00000151611	-0.181242	5.23035	-2.48799	0.0212872	-3.45784
ENSG00000153130	0.198927	7.14965	2.3752	0.0271006	-3.84847
ENSG00000151247	0.160438	7.89347	2.44552	0.0233243	-3.7616
ENSG00000151806	0.14119	6.87293	2.10472	0.0474828	-4.32452
ENSG00000248713	-0.403117	3.22973	-2.13439	0.0448253	-3.83594
ENSG00000132466	-0.117361	8.54719	-2.60692	0.0164318	-3.4789
ENSG00000196782	-0.367675	3.10678	-2.14026	0.0441794	-3.81251
ENSG00000159788	-0.268014	4.84867	-3.05433	0.00600476	-2.28854
ENSG00000178177	-0.367219	6.61279	-3.14372	0.00515069	-2.27933
ENSG00000273238	0.269716	4.23193	2.3766	0.02702	-3.53209
ENSG00000168993	0.431336	6.81386	3.61272	0.00179368	-1.30122
ENSG00000197712	0.23541	3.16738	2.29466	0.032116	-3.55372
ENSG00000170088	0.367059	3.32848	3.08502	0.00559532	-2.1213
ENSG00000002549	-0.310235	5.32692	-2.32195	0.0308577	-3.77945
ENSG00000152208	-0.219262	5.97909	-2.93706	0.00785204	-2.63751
ENSG00000188848	-0.350686	4.38096	-3.53227	0.00196677	-1.25556
ENSG00000185477	-0.282357	6.06273	-2.53492	0.0195107	-3.46388
ENSG00000184305	-0.195401	5.89935	-2.29133	0.0323406	-3.89693
ENSG00000138792	-0.539962	2.03446	-3.04435	0.00614411	-2.23666
ENSG00000164112	0.875345	3.73708	2.1154	0.0498907	-3.93441
ENSG00000186352	0.538691	2.54384	3.07207	0.00576478	-2.16394
ENSG00000109738	0.163812	8.098	2.62411	0.0158231	-3.42056
ENSG00000174780	0.119843	6.92476	2.70292	0.0132942	-3.19013
ENSG00000129116	-0.420624	2.01744	-2.527	0.0195631	-3.11262
ENSG00000145362	-0.188429	10.9004	-2.76383	0.011607	-3.2705
ENSG00000083896	-0.223077	7.28976	-3.61887	0.00160198	-1.24642
ENSG00000151726	0.149525	6.15821	2.24517	0.035607	-4.00671
ENSG00000171421	0.245657	2.64383	2.18991	0.0399128	-3.67634
ENSG00000183654	0.49407	1.69256	2.18026	0.0407113	-3.64321
ENSG00000124275	-0.245479	3.91256	-2.37272	0.0272436	-3.50804
ENSG00000049860	-0.24961	5.72921	-2.80858	0.0104993	-2.87275
ENSG00000174695	0.102238	6.69656	2.10326	0.0476235	-4.31198
ENSG00000197860	0.207509	7.91769	3.00492	0.00672541	-2.61708
ENSG00000168685	0.730787	0.142376	3.12654	0.00508404	-2.45519
ENSG00000127184	0.401387	5.59881	2.52519	0.020825	-3.45939
ENSG00000250722	-0.227564	7.05938	-2.19929	0.0396138	-4.16894
ENSG00000164211	-0.436108	5.58499	-4.08625	0.000525189	-0.108944
ENSG00000164588	0.242369	7.82947	2.27509	0.0341733	-4.09142
ENSG00000164318	-0.744635	1.64538	-2.53755	0.0193047	-3.10515
ENSG00000152413	-0.243353	8.96419	-2.42786	0.0247505	-3.85948
ENSG00000146005	-0.270749	5.85949	-2.9861	0.0070213	-2.52048
ENSG00000164219	-0.377216	4.46851	-4.29775	0.000316333	0.3817
ENSG00000064652	0.376648	3.5399	3.81976	0.000993109	-0.656639
ENSG00000175449	0.193363	4.29568	2.09216	0.048703	-4.04434
ENSG00000145721	0.157286	6.80849	2.58336	0.0173024	-3.42411
ENSG00000145685	-0.351475	4.39063	-2.78648	0.011033	-2.7853
ENSG00000150712	0.153602	6.29351	2.16766	0.0417765	-4.15814
ENSG00000197948	-0.339154	3.2422	-2.81546	0.0103383	-2.63257
ENSG00000113552	0.241035	3.74991	2.98131	0.00709854	-2.34173
ENSG00000174132	0.152307	5.50365	2.64327	0.0151695	-3.18347
ENSG00000145781	0.238708	4.32192	2.21753	0.0377046	-3.82973
ENSG00000022355	0.231017	8.98696	3.02709	0.00639238	-2.62611
ENSG00000113594	0.338857	6.46619	2.35112	0.0299455	-3.86283
ENSG00000145715	-0.119191	7.54181	-2.30993	0.0311039	-3.9967
ENSG00000164466	0.186623	6.05971	2.79005	0.0109451	-2.94503
ENSG00000164402	0.139698	8.81098	2.23308	0.0365113	-4.20904
ENSG00000178394	0.437047	5.04059	3.34391	0.00315783	-1.71653
ENSG00000177034	0.135761	6.41465	2.24548	0.0355841	-4.03175
ENSG00000064692	-0.78903	1.42131	-2.92717	0.00803062	-2.48764
ENSG00000112855	-0.14616	5.20277	-2.34839	0.0286835	-3.71274
ENSG00000255408	0.406748	1.87396	2.10071	0.0478695	-3.7638
ENSG00000185129	-0.125526	7.30257	-2.13858	0.0443314	-4.29247
ENSG00000145864	0.154714	8.57224	3.23274	0.00397379	-2.1595
ENSG00000182132	0.283837	4.17262	3.05632	0.00597744	-2.22209
ENSG00000086200	0.117461	6.98661	2.41003	0.0251645	-3.7699
ENSG00000153113	0.274632	3.7306	2.2941	0.0321535	-3.61492
ENSG00000158985	0.179036	7.79557	3.43193	0.00249226	-1.68489
ENSG00000050748	0.196551	8.09099	3.79024	0.00106557	-0.89688
ENSG00000156475	0.147346	7.48414	2.35978	0.0280008	-3.89721
ENSG00000113161	-0.317245	8.06175	-3.71173	0.00128908	-1.07308
ENSG00000170624	-0.484163	3.87354	-2.24697	0.0368034	-3.75199
ENSG00000146094	-0.59963	1.42446	-2.78824	0.0109896	-2.71701
ENSG00000145632	0.217213	8.79811	3.56787	0.00180786	-1.4296
ENSG00000039139	-0.344488	5.03979	-3.65321	0.00147653	-1.03352
ENSG00000213523	0.149522	5.91829	2.53902	0.019059	-3.42661
ENSG00000113649	0.159999	6.75294	2.40904	0.025218	-3.75562
ENSG00000204628	-0.150194	6.70823	-2.62167	0.0159081	-3.33373
ENSG00000113758	-0.16007	7.17274	-2.61787	0.0160417	-3.3748
ENSG00000113211	0.369518	2.69146	3.02689	0.00639533	-2.23525
ENSG00000164220	1.04	1.0864	3.31916	0.00324774	-1.96954
ENSG00000120129	-1.51375	3.81315	-2.93485	0.00976251	-2.57155
ENSG00000113719	0.194618	6.16863	2.39502	0.0259827	-3.72654
ENSG00000170469	0.375282	2.42335	2.21728	0.0377244	-3.61575
ENSG00000112981	0.305738	3.71598	2.58083	0.0173984	-3.09939
ENSG00000031003	-0.156312	6.85133	-2.67896	0.0140194	-3.23466
ENSG00000198780	0.149257	7.55351	2.70975	0.0130939	-3.21728
ENSG00000038274	0.250231	7.1627	3.19654	0.00432284	-2.16775
ENSG00000132357	-0.5753	0.598338	-2.23806	0.0361361	-3.57599
ENSG00000095015	-0.524358	3.83881	-4.21413	0.000386504	0.181521
ENSG00000145860	0.136904	6.76236	2.38136	0.0267482	-3.80797
ENSG00000164332	0.217976	5.53142	2.25596	0.0348175	-3.92256
ENSG00000135077	0.639751	2.35804	3.94012	0.000744934	-0.60252
ENSG00000145675	-0.202788	8.69771	-4.34404	0.000283124	0.350226
ENSG00000145920	0.505954	8.43884	4.09436	0.000634586	-0.374882
ENSG00000176928	0.527017	3.78397	3.91957	0.000782462	-0.439787
ENSG00000152359	0.175877	5.7148	2.9897	0.00696373	-2.50117
ENSG00000113231	0.224618	6.29267	2.17036	0.0417471	-4.15414
ENSG00000145824	0.30628	5.2219	3.00947	0.00665574	-2.41234
ENSG00000138829	-0.811955	2.00735	-4.05301	0.000568572	-0.426071
ENSG00000113648	-0.207977	6.04497	-2.81197	0.0104195	-2.89587
ENSG00000038382	-0.127582	8.47177	-2.10401	0.0475511	-4.42797
ENSG00000164237	-0.466612	3.09613	-3.02222	0.00646412	-2.2395
ENSG00000153922	-0.163028	6.49043	-2.29822	0.031877	-3.93967
ENSG00000112685	0.125828	6.40257	2.27927	0.0331667	-3.96601
ENSG00000164379	0.786815	0.120206	2.68365	0.0138744	-3.06589
ENSG00000054598	-0.855816	2.7287	-2.25463	0.0370902	-3.62014
ENSG00000156639	0.240413	5.19892	3.6366	0.00153596	-1.07772
ENSG00000111859	-0.696282	3.90572	-3.24275	0.004334	-1.9119
ENSG00000112079	-0.269145	5.56785	-3.39147	0.00274116	-1.63666
ENSG00000183826	-0.183929	6.2428	-2.98758	0.00699757	-2.54987
ENSG00000146221	0.739788	0.903276	2.42635	0.0243021	-3.31947
ENSG00000112130	-0.377736	2.30576	-2.26399	0.0342401	-3.54042
ENSG00000154079	0.262359	2.9916	2.51211	0.0202051	-3.16236
ENSG00000111860	-0.184668	5.836	-2.10924	0.0470511	-4.21721
ENSG00000198833	0.14274	7.23468	2.40303	0.0255429	-3.79719
ENSG00000178233	-0.211908	6.52549	-2.50753	0.0204066	-3.54431
ENSG00000112339	-0.170846	5.72158	-3.02721	0.00639066	-2.42436
ENSG00000164434	-0.827553	5.34126	-2.5007	0.0235199	-3.50675
ENSG00000112837	-1.04263	2.0027	-2.60059	0.0179814	-3.03156
ENSG00000111885	-0.239631	6.77435	-2.25098	0.0356539	-4.05668
ENSG00000277443	-0.109364	8.36113	-2.13269	0.044865	-4.3732
ENSG00000172594	0.243785	4.32939	2.7434	0.0121488	-2.85859
ENSG00000111880	-0.221601	6.24507	-3.27739	0.00358088	-1.93628
ENSG00000131016	-0.342782	5.13638	-2.40835	0.0258588	-3.60381
ENSG00000168438	0.13902	6.15233	2.3543	0.0283274	-3.8074
ENSG00000164440	-0.308289	2.4556	-2.34106	0.0291309	-3.42458
ENSG00000001036	-0.147393	5.66949	-2.28185	0.032988	-3.88975
ENSG00000184465	0.74202	1.28611	3.4731	0.0022618	-1.67413
ENSG00000164694	-0.961898	1.30499	-3.47537	0.00224972	-1.57677
ENSG00000135537	-0.226401	4.37429	-2.87766	0.00898503	-2.60069
ENSG00000198945	-0.142774	5.59778	-2.1032	0.0476291	-4.20186
ENSG00000112210	-0.19676	4.97131	-2.10666	0.0472971	-4.11552
ENSG00000164442	0.253051	3.52237	2.16982	0.0415922	-3.79596
ENSG00000135312	-0.533602	4.28905	-3.73581	0.00122941	-0.830529
ENSG00000219607	0.678902	1.38821	3.09682	0.00544514	-2.26386
ENSG00000204681	0.150708	9.50054	3.30682	0.0033429	-2.04326
ENSG00000124587	-0.273484	4.25351	-2.83011	0.0100029	-2.68247
ENSG00000112651	0.331756	4.49647	3.61232	0.00162705	-1.08865
ENSG00000112658	-0.216023	4.56191	-2.36393	0.0277557	-3.60269
ENSG00000029639	0.343453	2.78372	2.33645	0.0294159	-3.44521
ENSG00000213079	0.197181	6.40709	2.7175	0.0128702	-3.12362
ENSG00000096060	0.453388	4.41496	4.83523	8.76108e-05	1.52497
ENSG00000146151	-0.182888	4.88346	-2.57975	0.0174393	-3.24265
ENSG00000214113	0.21684	5.06959	2.6785	0.0140338	-3.06818
ENSG00000124571	0.145283	6.51377	2.89516	0.00863598	-2.7652
ENSG00000124688	0.392849	1.93339	2.19682	0.0393497	-3.62381
ENSG00000120254	0.439855	4.56786	3.6264	0.00157361	-1.0623
ENSG00000112146	0.194969	6.63721	2.81559	0.0103352	-2.94041
ENSG00000137275	-0.264559	3.61953	-2.37886	0.0268908	-3.46025
ENSG00000198937	-0.353828	3.06392	-2.79822	0.0107464	-2.65885
ENSG00000137261	-0.19282	6.6004	-3.57727	0.00176805	-1.30006
ENSG00000196230	-0.155621	8.81822	-2.33471	0.0295241	-4.02057
ENSG00000198755	0.218137	5.59545	2.38528	0.0265265	-3.69121
ENSG00000132424	-0.176803	8.97723	-3.15617	0.00474723	-2.34828
ENSG00000146070	-0.178027	6.43925	-2.17757	0.0409368	-4.15782
ENSG00000204356	0.224133	3.84078	2.20283	0.0388659	-3.78505
ENSG00000135333	0.443483	7.3821	3.10376	0.00608229	-2.46642
ENSG00000112739	-0.144182	7.92188	-2.57724	0.0175352	-3.50185
ENSG00000118432	-0.197044	8.64904	-2.49503	0.0209661	-3.70859
ENSG00000223501	0.163186	5.13672	2.18133	0.0406222	-4.00533
ENSG00000235863	0.483938	1.07925	2.26703	0.0340246	-3.52687
ENSG00000197594	-0.811692	2.64698	-2.19765	0.0413657	-3.69713
ENSG00000120256	0.13561	7.25777	2.41753	0.024765	-3.77279
ENSG00000168566	-0.168059	6.06232	-2.33741	0.0293561	-3.82759
ENSG00000112578	0.231269	4.07826	2.78465	0.0110783	-2.74986
ENSG00000146373	-0.158055	6.70298	-2.25036	0.035225	-4.04783
ENSG00000146433	0.141972	6.08714	2.26349	0.0342759	-3.96736
ENSG00000185760	0.40171	7.05996	2.85575	0.010347	-2.94051
ENSG00000111961	-0.264506	6.13125	-3.05309	0.00602199	-2.40378
ENSG00000112242	0.293731	4.77579	2.89097	0.00871832	-2.6111
ENSG00000030110	0.495094	1.95522	2.6804	0.0139748	-2.86942
ENSG00000124641	-0.2947	4.46976	-3.68829	0.0013584	-0.927785
ENSG00000111850	0.576851	3.82337	4.53627	0.000178718	0.839749
ENSG00000112186	0.183081	8.24444	2.67619	0.0141054	-3.32255
ENSG00000203877	0.526871	0.892883	2.24749	0.0354361	-3.55973
ENSG00000198663	0.162134	5.21123	2.25323	0.0350159	-3.88516
ENSG00000001084	0.176855	6.13939	3.34273	0.00307331	-1.78425
ENSG00000204264	-0.783857	0.914922	-3.3556	0.00298199	-1.88666
ENSG00000111834	-0.511763	3.42017	-3.17478	0.00454676	-1.95051
ENSG00000204498	0.365688	1.82714	2.26618	0.0340844	-3.51931
ENSG00000112365	0.280219	4.37811	3.18369	0.00445378	-1.98022
ENSG00000130396	-0.135546	8.09168	-2.19927	0.0391519	-4.23319
ENSG00000156564	0.465629	4.11111	2.31967	0.0315705	-3.63256
ENSG00000112159	-0.248365	7.91356	-3.23466	0.00395604	-2.12616
ENSG00000161904	-0.235432	3.79881	-2.30195	0.0316291	-3.61377
ENSG00000189367	-0.180426	6.6783	-2.73642	0.0123394	-3.10437
ENSG00000124614	-0.559487	1.3952	-2.8973	0.00859401	-2.54805
ENSG00000137166	0.353641	2.99876	2.15593	0.0427908	-3.75746
ENSG00000152818	-0.264352	7.51401	-2.30177	0.0326038	-4.02288
ENSG00000204209	0.166425	4.36395	2.0961	0.0483174	-4.0409
ENSG00000112319	0.716786	2.74966	2.2258	0.0385616	-3.63866
ENSG00000164828	0.175435	6.76659	2.14786	0.0435009	-4.23419
ENSG00000106537	0.137742	7.57008	2.62316	0.0158561	-3.39164
ENSG00000189043	0.207705	6.68224	2.88554	0.00882621	-2.79439
ENSG00000240230	0.197909	4.53948	2.59026	0.0170429	-3.17692
ENSG00000070882	0.349798	5.36132	2.74523	0.0123615	-2.97359
ENSG00000180354	-0.224726	7.56231	-4.03369	0.000595491	-0.317495
ENSG00000106524	0.207601	6.34986	2.98638	0.00701677	-2.56456
ENSG00000146729	0.190175	6.20665	3.63331	0.001548	-1.15111
ENSG00000146733	-0.275696	3.87569	-2.12547	0.045528	-3.93581
ENSG00000106605	0.223738	4.07221	2.3138	0.0308523	-3.62339
ENSG00000196636	0.246267	4.42204	2.58538	0.0172262	-3.17493
ENSG00000122507	-0.22916	6.06915	-3.33858	0.00310332	-1.78649
ENSG00000006715	0.113432	8.14956	2.8039	0.0106102	-3.05427
ENSG00000070669	0.167164	6.98125	2.73375	0.0124129	-3.12885
ENSG00000242265	-0.391141	3.53101	-2.65175	0.0148884	-2.9583
ENSG00000105854	-0.258865	4.75829	-2.4722	0.0220246	-3.42951
ENSG00000184408	0.181708	6.82693	2.56964	0.0178289	-3.44777
ENSG00000214194	-0.290594	5.22244	-2.97252	0.00724239	-2.49103
ENSG00000164603	-0.149937	6.10094	-2.25998	0.0345274	-3.97555
ENSG00000146918	-0.189526	3.93427	-2.4087	0.0252358	-3.4471
ENSG00000085662	0.345628	4.18756	2.77811	0.011242	-2.78009
ENSG00000172209	0.170652	7.61369	2.42257	0.0244996	-3.78925
ENSG00000221838	-0.210634	4.04479	-2.12578	0.0454995	-3.95272
ENSG00000166997	-0.293017	4.44263	-2.80252	0.0106431	-2.75673
ENSG00000105810	-0.297625	2.36987	-2.1412	0.0440956	-3.73473
ENSG00000133612	-0.168517	6.41391	-2.15109	0.0432151	-4.19721
ENSG00000006625	0.201455	4.8491	2.26604	0.0340942	-3.81664
ENSG00000106105	0.10446	7.33022	2.39078	0.0262182	-3.82723
ENSG00000002933	0.321507	2.33755	2.27165	0.0336979	-3.52582
ENSG00000090266	-0.327151	5.2208	-3.97696	0.000682095	-0.333727
ENSG00000090263	0.305345	4.38727	2.14169	0.0442355	-3.97311
ENSG00000160917	0.181928	4.4109	2.34731	0.0287492	-3.61176
ENSG00000241468	0.188067	5.63382	2.40436	0.0254706	-3.65719
ENSG00000174469	0.161602	7.35709	2.48694	0.0213353	-3.65152
ENSG00000170027	-0.177305	9.68995	-2.13299	0.0449029	-4.44047
ENSG00000106211	-1.33261	0.00992117	-4.19662	0.000403073	-0.883985
ENSG00000135164	-0.148609	7.33291	-2.76262	0.0116383	-3.09617
ENSG00000091136	-0.290083	5.29873	-2.22945	0.0372993	-3.95078
ENSG00000106080	-0.462354	3.44609	-3.56381	0.00182531	-1.17418
ENSG00000176428	0.304237	3.31967	2.70019	0.0133748	-2.84565
ENSG00000106344	-0.252637	6.24891	-3.44398	0.00242252	-1.57135
ENSG00000160993	0.41129	1.38428	2.11724	0.0462948	-3.72878
ENSG00000122565	0.331645	7.07724	2.11485	0.0487458	-4.34137
ENSG00000049541	0.169232	4.70206	2.14135	0.0440816	-4.017
ENSG00000106330	0.920691	-0.570772	3.00179	0.00677388	-2.80305
ENSG00000077080	0.200741	5.32661	2.60833	0.0163812	-3.23459
ENSG00000087087	-0.236551	6.82657	-3.04751	0.00609966	-2.46527
ENSG00000128602	-0.326177	2.96284	-2.2834	0.0328817	-3.55774
ENSG00000136267	0.245537	8.26477	2.668	0.0145692	-3.35458
ENSG00000257923	0.229965	5.85996	2.30805	0.0312271	-3.86068
ENSG00000132434	0.165276	7.51593	2.29008	0.032425	-4.03115
ENSG00000055609	-0.177431	8.01512	-2.37869	0.0269007	-3.89586
ENSG00000122642	-0.270702	5.46129	-2.99245	0.00692014	-2.47362
ENSG00000187416	0.211769	4.38014	2.15676	0.0427179	-3.94297
ENSG00000127947	-0.164336	5.60703	-2.52986	0.0194422	-3.42014
ENSG00000184863	-0.166845	7.01714	-2.62915	0.0156485	-3.34416
ENSG00000055118	0.372859	3.37002	2.7826	0.0111294	-2.69679
ENSG00000205903	0.208073	4.86714	2.99333	0.00690615	-2.4137
ENSG00000164631	0.188939	5.38352	2.22296	0.0372837	-3.96099
ENSG00000153993	-0.628778	4.91374	-4.64926	0.000147695	1.08504
ENSG00000164548	-0.339437	7.17077	-5.49843	1.84037e-05	3.00428
ENSG00000001630	-0.290348	7.11814	-2.63566	0.0159031	-3.35213
ENSG00000106263	-0.250819	6.1047	-2.45185	0.02308	-3.61686
ENSG00000048405	-0.237076	5.34766	-2.56886	0.0178593	-3.31423
ENSG00000136261	0.218133	5.4174	3.86348	0.000894695	-0.593935
ENSG00000117868	-0.172222	7.38326	-2.24794	0.0354029	-4.101
ENSG00000049540	-0.788488	2.62881	-2.17127	0.0435322	-3.73574
ENSG00000263001	-0.145074	7.04291	-2.68612	0.0137987	-3.22691
ENSG00000004799	-0.471371	2.96259	-3.35182	0.00300853	-1.60928
ENSG00000127995	0.129613	7.09879	2.43099	0.0240619	-3.73891
ENSG00000010270	-0.148973	5.40124	-2.16538	0.0419715	-4.067
ENSG00000122566	-0.217202	9.11521	-2.12735	0.0461345	-4.42784
ENSG00000197362	0.396951	3.26122	3.02494	0.00642402	-2.2353
ENSG00000155660	-0.528132	6.70591	-4.86735	9.10699e-05	1.51157
ENSG00000122512	0.16388	5.18353	2.34194	0.0290768	-3.72147
ENSG00000058404	0.133216	9.04707	2.47085	0.0220886	-3.77126
ENSG00000086289	0.142357	6.28047	2.25011	0.0352434	-4.00841
ENSG00000128534	0.310275	4.94697	2.78616	0.0110409	-2.84094
ENSG00000122786	-0.492977	4.93459	-2.94628	0.00828989	-2.56744
ENSG00000128595	-0.167336	7.18708	-2.39783	0.0258273	-3.80462
ENSG00000135250	0.109449	8.89675	2.35327	0.0283892	-3.99184
ENSG00000183943	-0.219648	3.77209	-2.22633	0.037025	-3.74314
ENSG00000146950	0.417382	6.4066	3.54583	0.00203867	-1.40354
ENSG00000078596	-0.278242	5.3568	-2.49481	0.0209999	-3.4599
ENSG00000179542	0.225081	7.23797	2.96574	0.00735531	-2.66817
ENSG00000165775	0.278569	5.70299	3.604	0.00165949	-1.18294
ENSG00000188153	-0.798117	2.38349	-2.17411	0.0431432	-3.7135
ENSG00000134594	0.304077	3.41154	2.22881	0.0368354	-3.68256
ENSG00000185985	0.220211	5.88713	3.01505	0.00657129	-2.4659
ENSG00000130962	-0.531299	4.26973	-2.32556	0.0318462	-3.66604
ENSG00000182287	0.364365	4.59568	3.17084	0.00458857	-2.02362
ENSG00000004848	0.334888	3.12432	2.17619	0.0410531	-3.73835
ENSG00000131089	0.156238	9.28006	3.06181	0.00590236	-2.567
ENSG00000080561	0.203825	5.45733	2.81061	0.0104514	-2.84363
ENSG00000232119	0.239465	5.5564	2.77208	0.0113947	-2.93133
ENSG00000102385	0.283242	6.78044	2.81094	0.0106179	-2.9694
ENSG00000125675	0.150147	9.03614	2.37829	0.0269231	-3.95709
ENSG00000184831	0.229609	4.35639	2.38145	0.0267433	-3.54934
ENSG00000187325	0.158756	5.04989	2.3425	0.0290426	-3.70644
ENSG00000147050	-0.217136	6.07874	-3.02585	0.00641053	-2.45893
ENSG00000130066	-0.460812	5.53782	-4.54476	0.000175128	0.912411
ENSG00000268089	0.66539	1.54762	2.16633	0.0419608	-3.66159
ENSG00000001497	0.166661	6.01325	2.30212	0.0316176	-3.8869
ENSG00000165704	0.202216	7.65202	3.30371	0.0033673	-1.95864
ENSG00000269556	-0.282577	4.39451	-3.14825	0.00483508	-2.05616
ENSG00000126733	0.885581	0.567759	3.47564	0.00224828	-1.88154
ENSG00000067829	0.255679	6.44143	3.53266	0.00196495	-1.38775
ENSG00000204116	0.174317	6.59979	2.85728	0.00940858	-2.84917
ENSG00000102100	-0.257554	4.00945	-3.22457	0.0040501	-1.87254
ENSG00000067992	0.242623	5.59151	3.76243	0.00113861	-0.827429
ENSG00000125962	0.242888	5.77365	3.18055	0.00448635	-2.10483
ENSG00000196976	0.317735	2.507	2.93559	0.00787837	-2.40625
ENSG00000184368	0.162226	7.85206	2.64088	0.0152496	-3.36574
ENSG00000120500	0.786317	0.661445	2.51146	0.0202335	-3.22264
ENSG00000090889	0.571023	0.614326	2.4641	0.0224115	-3.28886
ENSG00000102053	0.187754	6.08288	3.0454	0.00612926	-2.41956
ENSG00000005022	0.252666	7.05468	2.43103	0.0244713	-3.74283
ENSG00000165349	-0.295634	3.99649	-2.55189	0.0185326	-3.19108
ENSG00000102225	0.206586	6.41562	2.21974	0.0375332	-4.07583
ENSG00000071889	0.363483	3.62482	3.05913	0.00593891	-2.18052
ENSG00000147162	-0.111161	8.91632	-2.40114	0.0256461	-3.9031
ENSG00000102144	0.344827	7.86286	2.52318	0.0211134	-3.64369
ENSG00000029993	0.380714	4.49136	2.21555	0.038786	-3.8631
ENSG00000243279	0.368291	3.58536	3.22582	0.00403832	-1.8509
ENSG00000185053	0.314262	3.73527	2.42576	0.0243331	-3.38458
ENSG00000159167	0.931449	-0.123371	2.67041	0.0142871	-3.11889
ENSG00000156687	0.290606	5.65346	2.23075	0.0373878	-3.98927
ENSG00000133878	-0.187438	5.86636	-2.2023	0.0389082	-4.0502
ENSG00000104671	0.191769	5.66378	3.08586	0.00558446	-2.29223
ENSG00000165061	0.48489	6.06446	3.67444	0.00156845	-1.12858
ENSG00000205189	-0.360073	5.16525	-3.75311	0.00116418	-0.822924
ENSG00000156103	-0.257237	7.17732	-2.37462	0.0277114	-3.85889
ENSG00000147586	0.375346	2.51846	2.60051	0.0166646	-2.99174
ENSG00000184672	0.151594	6.7831	2.41678	0.0248046	-3.73853
ENSG00000104341	0.247286	5.61224	2.71165	0.0130386	-3.06068
ENSG00000136999	0.304204	7.92402	3.48718	0.00220907	-1.58298
ENSG00000155792	-0.296256	5.08131	-2.1258	0.0461529	-4.1025
ENSG00000120899	0.198922	8.28373	3.04526	0.00613127	-2.55796
ENSG00000164758	0.259308	4.48739	2.53082	0.0194016	-3.28114
ENSG00000147676	0.314154	8.42841	5.01117	5.77226e-05	1.88283
ENSG00000198576	-1.61527	5.89559	-2.55207	0.021824	-3.48451
ENSG00000147655	-0.558531	5.48593	-3.74636	0.00135452	-0.954194
ENSG00000180155	0.378338	6.97185	2.87277	0.0097959	-2.88265
ENSG00000181195	0.590889	3.77207	2.77766	0.0118497	-2.76257
ENSG00000066827	-0.209575	4.25689	-2.15688	0.0427077	-3.9329
ENSG00000173334	-0.772486	3.84031	-2.67312	0.0157317	-3.00576
ENSG00000147548	-0.213691	6.97862	-2.9399	0.00780156	-2.70313
ENSG00000261236	0.228374	4.61693	2.73521	0.0123727	-2.9016
ENSG00000120533	0.200654	6.45916	3.21779	0.00411448	-2.07902
ENSG00000104218	-0.174785	7.11639	-2.13862	0.0443275	-4.28109
ENSG00000104691	0.193979	5.16841	2.73892	0.0122706	-2.95898
ENSG00000168453	0.618974	1.95031	2.8767	0.00900458	-2.54113
ENSG00000164919	0.187543	7.88311	2.22011	0.0375041	-4.18147
ENSG00000104290	0.108258	8.6926	2.19811	0.0392454	-4.27092
ENSG00000104365	-0.17319	5.72543	-2.24705	0.0354687	-3.95511
ENSG00000175305	0.202936	4.42104	2.39355	0.0260642	-3.53013
ENSG00000147650	0.178326	6.0101	2.0866	0.0492515	-4.26953
ENSG00000176595	0.149104	6.50983	2.16131	0.0423222	-4.18772
ENSG00000076554	-0.167974	6.37169	-2.53577	0.0191943	-3.47991
ENSG00000147316	0.176022	5.10636	2.6144	0.0161644	-3.19994
ENSG00000205002	0.87462	0.316869	3.06457	0.00586513	-2.52799
ENSG00000167700	0.667854	1.00355	2.22817	0.0368846	-3.58437
ENSG00000129295	0.419491	4.57086	2.79827	0.0110033	-2.78683
ENSG00000104497	-0.142393	5.44202	-2.13579	0.0445831	-4.12219
ENSG00000104320	0.163182	5.29839	2.28936	0.0324739	-3.83144
ENSG00000020181	-0.372022	2.59229	-2.32958	0.029845	-3.45298
ENSG00000157110	-0.53051	1.68962	-2.41094	0.0251157	-3.2984
ENSG00000164684	-0.142524	7.13234	-2.42077	0.0245937	-3.7593
ENSG00000147408	0.13772	5.72951	2.35428	0.0283284	-3.7588
ENSG00000175895	-0.247763	3.39126	-2.38165	0.0267318	-3.42784
ENSG00000153310	0.136073	7.9192	2.98682	0.00700966	-2.65891
ENSG00000104549	-0.18539	6.34311	-2.15341	0.0430112	-4.18597
ENSG00000168172	-0.242441	8.42563	-4.99188	6.04199e-05	1.84223
ENSG00000003987	0.223555	6.85681	3.87645	0.000867392	-0.647993
ENSG00000154188	-0.218032	4.96078	-2.34079	0.0291476	-3.69836
ENSG00000106688	0.147763	6.85453	2.59131	0.0170038	-3.40647
ENSG00000205808	0.350425	5.83795	4.29355	0.000319531	0.342191
ENSG00000147854	-0.142884	6.6169	-2.47936	0.0216874	-3.60947
ENSG00000086102	0.131927	6.94001	2.61885	0.0160071	-3.35992
ENSG00000119121	-0.784312	0.936393	-2.89184	0.00870111	-2.60542
ENSG00000107372	0.190522	7.93049	3.83007	0.000968969	-0.80081
ENSG00000135048	-0.33694	5.49792	-2.71605	0.0131963	-3.0533
ENSG00000130222	-1.03032	3.85271	-3.13489	0.00599425	-2.16614
ENSG00000136891	0.140295	5.24209	2.1262	0.0454607	-4.11634
ENSG00000165030	-0.695387	2.67669	-3.505	0.00209775	-1.33594
ENSG00000119318	0.203422	8.2289	3.78101	0.00108928	-0.922743
ENSG00000078725	0.171351	7.46865	2.22832	0.0368724	-4.14031
ENSG00000148200	0.373628	3.84399	2.20437	0.0390423	-3.78953
ENSG00000136826	-0.840771	0.987374	-2.98999	0.00695914	-2.44933
ENSG00000147872	-0.410451	2.12437	-2.47608	0.0218413	-3.19599
ENSG00000070159	0.299278	5.77469	2.83315	0.00995134	-2.82801
ENSG00000185585	-0.387034	2.40147	-2.38164	0.0267326	-3.35718
ENSG00000136856	0.305023	2.24467	2.09681	0.0482476	-3.786
ENSG00000197958	0.29153	6.74187	2.50375	0.0211829	-3.58474
ENSG00000160401	-0.645138	0.13223	-2.10393	0.0475588	-3.76464
ENSG00000095370	-0.703998	2.51725	-3.83574	0.000955954	-0.720956
ENSG00000136807	-0.142077	5.58424	-2.33643	0.0294171	-3.77842
ENSG00000171169	-0.378075	1.96885	-2.10116	0.0478263	-3.7747
ENSG00000188312	0.690835	1.40553	3.54059	0.00192845	-1.5309
ENSG00000106819	-0.51372	2.10119	-2.24458	0.0356505	-3.56349
ENSG00000159884	-0.237942	3.85851	-2.16208	0.0422561	-3.86896
ENSG00000137055	0.117839	6.99424	2.30882	0.0311763	-3.95936
ENSG00000096968	-0.150209	6.69929	-2.6722	0.0142307	-3.23447
ENSG00000106868	0.367133	4.067	3.65909	0.00145604	-0.976321
ENSG00000176248	-0.205475	5.58825	-2.31443	0.0308112	-3.81678
ENSG00000188229	-0.18145	7.95801	-2.92133	0.00813793	-2.79746
ENSG00000120156	-0.336432	4.59088	-2.29118	0.0327851	-3.74993
ENSG00000172889	-0.414756	4.20654	-3.12489	0.00510348	-2.08877
ENSG00000054148	-0.500728	1.20627	-2.29611	0.0320185	-3.4787
ENSG00000107223	0.17093	5.47861	2.15702	0.0426953	-4.0852
ENSG00000147912	0.23519	4.81482	2.17584	0.0410819	-3.96972
ENSG00000050555	-0.958633	1.92837	-2.17149	0.0435873	-3.69349
ENSG00000107186	-0.264649	7.76747	-3.01613	0.00658431	-2.59431
ENSG00000136888	0.196334	5.75903	2.09025	0.0488907	-4.23598
ENSG00000164946	-0.607113	3.88559	-2.898	0.00918976	-2.56272
ENSG00000213930	0.234905	4.31573	2.3685	0.0274885	-3.56049
ENSG00000148300	-0.193298	6.19487	-3.35494	0.00298659	-1.7619
ENSG00000044574	-0.541678	8.9777	-4.23043	0.000479637	-0.11587
ENSG00000197579	-0.190821	5.91788	-2.34476	0.0289041	-3.80137
ENSG00000107249	0.453924	2.22861	2.65714	0.0147124	-2.89744
ENSG00000198680	0.612922	0.682855	2.19273	0.0396824	-3.64171
ENSG00000119138	0.299843	7.29014	4.50358	0.000193251	0.761755
ENSG00000136872	0.465726	1.52453	2.52867	0.0194925	-3.12727
ENSG00000106772	0.131758	6.95421	2.15703	0.042694	-4.23349
ENSG00000155886	0.402345	8.63047	3.24215	0.00435093	-2.21103
ENSG00000119508	-0.675503	5.5415	-2.53002	0.0218659	-3.47086
ENSG00000136861	-0.354841	5.05775	-2.18708	0.0413991	-4.00187
ENSG00000106852	0.358124	3.65014	2.42509	0.024368	-3.3739
ENSG00000221829	0.296506	2.88104	2.36572	0.027651	-3.40409
ENSG00000120217	-0.662592	1.28753	-3.68956	0.00135431	-1.25745
ENSG00000123975	1.42351	-0.947176	3.89212	0.000835518	-1.86214
ENSG00000119522	-0.247819	5.97405	-2.49207	0.0211006	-3.52822
ENSG00000185963	-0.171641	6.52135	-3.64378	0.00150999	-1.14805
ENSG00000119396	-0.135757	8.10793	-2.56902	0.0178529	-3.53156
ENSG00000080503	-0.165291	8.95725	-2.56796	0.0178946	-3.5774
ENSG00000167333	-0.262562	2.80706	-2.09443	0.0484796	-3.85097
ENSG00000129158	-0.21436	5.86211	-2.67509	0.01414	-3.15371
ENSG00000166025	-0.220332	5.51447	-2.86658	0.00921289	-2.73964
ENSG00000149289	-0.203353	5.22885	-2.36049	0.0279586	-3.69247
ENSG00000054967	0.455454	2.09889	2.31723	0.0306303	-3.44916
ENSG00000137672	-0.387551	6.36496	-2.78113	0.0119709	-3.03014
ENSG00000168010	-0.159444	4.56349	-2.13076	0.0450415	-4.01769
ENSG00000110675	0.144411	7.84044	2.09936	0.048	-4.39732
ENSG00000198382	0.166812	5.81037	2.39586	0.0259364	-3.69467
ENSG00000152558	-0.523747	3.82617	-2.8681	0.00947251	-2.5917
ENSG00000149256	-0.271315	7.6354	-2.54931	0.019164	-3.55753
ENSG00000134910	-0.138244	6.8308	-2.48865	0.021257	-3.60604
ENSG00000110172	-0.251027	7.47863	-3.08444	0.00560283	-2.42953
ENSG00000149257	-0.817402	3.63759	-3.26121	0.00423275	-1.87026
ENSG00000068831	0.295768	3.3211	2.39955	0.0257329	-3.38733
ENSG00000068976	0.352543	3.24884	2.38849	0.0263462	-3.3971
ENSG00000110042	-0.231677	6.29208	-2.31673	0.0307485	-3.88835
ENSG00000184524	0.278999	7.27564	3.113	0.00525704	-2.35122
ENSG00000177830	0.189558	6.07265	2.98687	0.00700895	-2.53587
ENSG00000150764	-0.189651	7.12135	-2.26641	0.0340683	-4.04301
ENSG00000170242	-0.126251	8.2631	-2.28554	0.0327344	-4.08162
ENSG00000149269	0.20854	8.98984	3.32862	0.00317659	-1.96827
ENSG00000167771	0.366916	3.08182	2.42433	0.0244072	-3.32111
ENSG00000176340	0.245647	5.99874	2.86023	0.00934612	-2.79306
ENSG00000168439	-0.174516	7.89098	-2.7699	0.0114505	-3.11
ENSG00000130592	0.75496	2.80532	2.4617	0.0237054	-3.26668
ENSG00000175376	0.207827	4.62791	2.30766	0.0312527	-3.71127
ENSG00000174684	0.156539	6.27424	2.46194	0.0225163	-3.60991
ENSG00000134825	0.346773	3.74939	2.71266	0.0130094	-2.85548
ENSG00000110031	0.719941	0.525175	3.53843	0.00193834	-1.80998
ENSG00000166741	-0.864964	1.06233	-3.75867	0.00114887	-1.20399
ENSG00000086848	0.1859	4.41538	2.09204	0.0487141	-4.061
ENSG00000137720	0.17857	4.86888	2.54947	0.0186306	-3.29375
ENSG00000166788	-0.197209	4.19355	-2.46383	0.0224246	-3.37368
ENSG00000214517	0.25931	7.57049	2.91637	0.00826664	-2.79199
ENSG00000175482	0.303025	2.77101	2.25179	0.0351208	-3.58121
ENSG00000110080	-0.214777	3.92384	-2.18289	0.0404924	-3.83734
ENSG00000117984	-0.210094	6.20991	-4.06476	0.000552808	-0.187001
ENSG00000213619	0.141858	5.61959	2.12319	0.0457395	-4.16537
ENSG00000213593	0.130292	7.10465	2.34097	0.0291364	-3.90922
ENSG00000133794	-0.219098	5.55347	-2.51593	0.0200389	-3.43866
ENSG00000182985	-0.204793	9.37945	-2.69023	0.0136737	-3.35453
ENSG00000120451	0.165397	6.4079	3.00022	0.00679823	-2.53892
ENSG00000172757	0.134248	8.67178	2.41175	0.0250725	-3.86755
ENSG00000172803	0.203211	5.74734	2.73914	0.0122648	-3.01748
ENSG00000109832	0.145955	5.64696	2.40232	0.0255819	-3.66214
ENSG00000006118	-0.206256	6.13042	-2.29518	0.0320808	-3.9111
ENSG00000214753	-0.202071	7.9097	-2.61853	0.0160185	-3.41866
ENSG00000150768	0.210116	6.87455	4.41537	0.00023867	0.575373
ENSG00000214530	0.324419	3.93188	2.9423	0.00775903	-2.42849
ENSG00000118181	0.262379	6.7817	2.56454	0.0182943	-3.46468
ENSG00000132744	0.752113	-0.484439	2.21695	0.0377502	-3.69323
ENSG00000173113	0.393801	2.52032	2.27263	0.0336293	-3.53613
ENSG00000160584	0.176908	6.34173	2.48113	0.0216046	-3.58119
ENSG00000239306	-0.468895	3.42323	-2.51971	0.0201145	-3.20391
ENSG00000173914	-0.247027	5.43235	-2.57465	0.017635	-3.31382
ENSG00000110711	-0.199061	5.24687	-2.52109	0.0198158	-3.39161
ENSG00000006071	0.421149	3.66524	2.56347	0.0180707	-3.12276
ENSG00000137492	0.133813	6.73924	2.1249	0.0455806	-4.2745
ENSG00000198561	-0.296231	4.16795	-2.37297	0.0272292	-3.53951
ENSG00000179119	-0.198499	5.42517	-2.58054	0.0174094	-3.29985
ENSG00000187240	-0.214678	7.80722	-3.13723	0.00495995	-2.33133
ENSG00000183715	0.19662	8.90459	2.9869	0.00700843	-2.71132
ENSG00000048649	-0.16532	7.6209	-3.10719	0.00531643	-2.38587
ENSG00000149554	-0.550739	1.72289	-3.07674	0.0057031	-2.20829
ENSG00000182667	0.199827	7.96152	3.09458	0.00547336	-2.43406
ENSG00000135365	-0.21252	6.31326	-3.47086	0.00227379	-1.51659
ENSG00000173442	-0.328727	4.76071	-3.52957	0.00197937	-1.28249
ENSG00000110367	-0.165301	8.60811	-2.84868	0.00959304	-2.98683
ENSG00000167770	0.137051	7.04355	2.3197	0.0304721	-3.94425
ENSG00000184154	0.910536	0.787236	2.94495	0.00771224	-2.60482
ENSG00000110768	0.216435	6.41589	2.82875	0.0100337	-2.89625
ENSG00000204381	-0.500194	2.50165	-3.16625	0.00463761	-1.98591
ENSG00000170145	-0.206904	5.04571	-2.41029	0.0251505	-3.579
ENSG00000177030	0.375921	4.73368	4.29827	0.000315936	0.383445
ENSG00000151503	0.286579	5.42772	4.18814	0.000411345	0.122834
ENSG00000160695	0.159621	5.96061	2.64918	0.0149729	-3.21554
ENSG00000036672	0.244381	5.31117	2.19097	0.0398261	-4.00836
ENSG00000030066	-0.180311	4.89397	-2.1566	0.0427318	-4.02429
ENSG00000149428	-0.300631	7.0197	-4.63919	0.000139762	1.07863
ENSG00000188997	0.309202	2.97437	2.35962	0.0280101	-3.41954
ENSG00000137726	-0.315558	6.12249	-3.38792	0.00276411	-1.68225
ENSG00000149212	-0.167506	8.40407	-2.47996	0.0216592	-3.72153
ENSG00000110721	-0.111542	6.72758	-2.20654	0.0385698	-4.13117
ENSG00000149177	0.291553	7.2421	2.50285	0.0214157	-3.62807
ENSG00000151376	0.387599	5.82089	3.12559	0.00532151	-2.25484
ENSG00000110066	-0.143003	7.05688	-2.5204	0.0198454	-3.55968
ENSG00000173825	0.429856	1.43061	2.45512	0.0228484	-3.24338
ENSG00000166439	0.13799	7.27383	2.56866	0.0178671	-3.48207
ENSG00000162139	0.378082	1.88676	2.18441	0.0403661	-3.64072
ENSG00000154133	-0.43146	1.2613	-2.36077	0.0279425	-3.38245
ENSG00000062282	0.189273	5.01853	2.34149	0.0291044	-3.69975
ENSG00000165629	0.138743	7.83509	2.18178	0.0405851	-4.24537
ENSG00000151461	-0.187282	6.64052	-2.58101	0.0173915	-3.41152
ENSG00000107614	-0.333459	3.04785	-2.80644	0.01055	-2.64159
ENSG00000172671	0.212985	3.63102	2.32251	0.0302923	-3.55636
ENSG00000151023	-0.463812	2.56519	-2.34444	0.0289237	-3.43158
ENSG00000136770	-0.151578	6.23806	-2.34532	0.0288705	-3.8302
ENSG00000122912	0.234487	6.08494	3.20415	0.00424711	-2.07947
ENSG00000072401	0.238907	4.3425	2.29831	0.0318713	-3.69042
ENSG00000120594	-0.278393	6.82979	-3.63775	0.00153177	-1.18086
ENSG00000107789	0.177932	5.9739	2.11264	0.0467282	-4.21975
ENSG00000148572	0.305566	3.87962	2.84647	0.00964099	-2.61306
ENSG00000077420	0.586038	1.53127	2.69377	0.0135668	-2.87129
ENSG00000175395	0.190051	5.79133	3.41044	0.00262156	-1.61266
ENSG00000171160	0.209438	4.38078	2.25634	0.0347903	-3.77021
ENSG00000148843	-0.256828	5.06878	-3.05223	0.00603382	-2.31564
ENSG00000107560	0.105943	7.18488	2.19418	0.0395642	-4.18385
ENSG00000182022	0.282831	5.57302	2.48993	0.0213464	-3.49192
ENSG00000165650	0.104212	7.39698	2.19297	0.0396625	-4.20597
ENSG00000120008	0.136082	6.24201	2.68855	0.0137246	-3.16808
ENSG00000165672	0.206403	5.51746	2.26607	0.0340927	-3.89818
ENSG00000203867	0.506428	1.8738	2.43846	0.0236802	-3.25581
ENSG00000107938	-0.152359	6.10145	-2.22096	0.0374383	-4.0442
ENSG00000148908	0.260549	3.86657	2.44647	0.023277	-3.36188
ENSG00000165832	0.21432	5.22714	3.39347	0.00272825	-1.60652
ENSG00000151025	0.260085	7.67169	2.1831	0.0416914	-4.24588
ENSG00000107554	-0.287755	4.32745	-3.42271	0.00254695	-1.48266
ENSG00000182010	0.305084	2.51806	2.11828	0.0461971	-3.77023
ENSG00000185267	0.534496	1.15121	2.42971	0.0241282	-3.29623
ENSG00000173915	0.367482	6.88445	3.02624	0.00686008	-2.56016
ENSG00000196233	-0.209293	5.86067	-3.29598	0.00342867	-1.86723
ENSG00000196968	-0.277664	4.15367	-3.61188	0.00162874	-1.07821
ENSG00000198728	0.159461	5.80747	2.09554	0.0483713	-4.2339
ENSG00000150093	-0.323222	6.91854	-3.09899	0.00559259	-2.38221
ENSG00000136754	0.104306	7.64193	2.10682	0.0472818	-4.36894
ENSG00000120616	-0.107799	6.24278	-2.17001	0.0415758	-4.15088
ENSG00000166024	-0.255252	5.31127	-4.11324	0.000492195	-0.0374127
ENSG00000156110	-0.274328	5.74403	-3.62686	0.00157188	-1.13555
ENSG00000107758	0.161546	8.48209	3.02177	0.00647076	-2.61684
ENSG00000151923	-0.138722	6.92803	-2.23051	0.0367057	-4.10082
ENSG00000165449	-0.565951	0.827391	-2.12236	0.0458168	-3.72282
ENSG00000198408	-0.138887	9.11651	-2.69881	0.013416	-3.32066
ENSG00000130640	0.143892	5.3964	2.1409	0.0441224	-4.1088
ENSG00000096717	-0.179646	5.45009	-2.43442	0.0238859	-3.58033
ENSG00000108018	-0.22197	6.66508	-2.18593	0.0405542	-4.16316
ENSG00000122884	-0.250111	6.7432	-2.83832	0.00981979	-2.89842
ENSG00000176171	0.243181	6.28725	2.91969	0.0081684	-2.69756
ENSG00000096746	-0.303436	6.22819	-3.20437	0.00424489	-2.09232
ENSG00000122367	0.300914	2.73565	2.12075	0.0459663	-3.78716
ENSG00000165637	0.189613	7.89748	2.73315	0.0124294	-3.1889
ENSG00000108061	0.153769	7.32314	2.94713	0.00767408	-2.71003
ENSG00000150594	0.655981	2.31559	2.25241	0.0356203	-3.55815
ENSG00000122877	-1.7188	3.5846	-2.45627	0.026227	-3.39997
ENSG00000128805	0.552704	1.06114	2.21609	0.0378168	-3.59816
ENSG00000148444	0.184861	6.21705	3.03424	0.00628831	-2.45002
ENSG00000165813	-0.163703	6.95077	-2.11042	0.046939	-4.31479
ENSG00000134470	0.360725	2.43325	2.33219	0.0296811	-3.43401
ENSG00000177853	-0.270073	5.56299	-2.61185	0.0162551	-3.25241
ENSG00000119946	0.22741	5.95766	2.17372	0.041364	-4.11713
ENSG00000107537	0.236018	6.23121	3.0196	0.00650306	-2.48287
ENSG00000152455	-0.206052	3.31019	-2.10944	0.0470318	-3.87605
ENSG00000067057	-0.136717	9.20018	-2.86018	0.00934708	-2.98799
ENSG00000150275	-0.304395	6.02196	-3.16365	0.00466567	-2.16494
ENSG00000095794	-0.44138	4.78084	-4.01064	0.000629284	-0.243966
ENSG00000130037	0.93595	1.84306	4.09083	0.000519345	-0.515458
ENSG00000070018	-0.170995	7.59549	-3.15573	0.00475208	-2.28038
ENSG00000139174	0.241284	6.48133	2.14097	0.0447	-4.22396
ENSG00000139044	1.12021	-1.14568	3.17309	0.00456468	-2.72121
ENSG00000151743	-0.172651	5.64315	-2.53645	0.0191658	-3.40642
ENSG00000177981	0.233613	4.99335	2.33803	0.0293181	-3.70615
ENSG00000135447	0.277413	5.62525	2.69164	0.0136309	-3.09853
ENSG00000133687	0.410951	6.50662	3.95767	0.000744599	-0.473629
ENSG00000134294	-0.266679	6.75489	-3.02163	0.00647283	-2.51634
ENSG00000133704	-0.136694	7.27087	-2.41465	0.0249174	-3.78136
ENSG00000167566	0.447227	1.96749	2.39669	0.0258903	-3.32052
ENSG00000152944	-0.250291	4.95993	-2.84925	0.00958068	-2.71717
ENSG00000076067	-0.413581	2.07246	-2.28785	0.0325766	-3.49438
ENSG00000172819	-0.437538	2.65223	-3.02405	0.00643707	-2.2394
ENSG00000133773	0.21695	5.35574	3.01822	0.0065237	-2.40911
ENSG00000111647	0.157045	7.57068	3.2216	0.00407815	-2.13918
ENSG00000253719	-0.119917	7.31893	-2.12963	0.0451454	-4.30586
ENSG00000177889	0.165825	7.77541	2.58835	0.0171146	-3.47186
ENSG00000175183	-0.618932	3.19994	-2.98215	0.00728055	-2.33622
ENSG00000123360	0.15172	6.33724	2.45165	0.0230194	-3.63758
ENSG00000120833	-0.280721	4.23517	-2.11325	0.0466704	-4.00162
ENSG00000008405	0.325614	4.79152	2.39074	0.0264962	-3.58657
ENSG00000127314	-0.159364	6.60607	-2.41778	0.0247517	-3.72483
ENSG00000123384	-0.274263	8.50013	-2.36889	0.0285411	-3.96098
ENSG00000139292	1.03779	-0.132838	3.34296	0.00307167	-2.25919
ENSG00000151948	0.206198	5.07491	2.63919	0.0153065	-3.14123
ENSG00000111696	0.152714	5.71548	2.13364	0.0447785	-4.15935
ENSG00000240771	0.261693	6.61098	2.30745	0.0318478	-3.93822
ENSG00000135643	-0.444844	4.50754	-2.86413	0.00954388	-2.65353
ENSG00000166006	0.333828	6.91714	3.73727	0.00120895	-0.960799
ENSG00000111775	0.262473	4.8025	2.48002	0.0216561	-3.41367
ENSG00000169884	0.880154	-0.147373	2.27514	0.0334537	-3.59757
ENSG00000110811	-0.222514	3.91881	-2.11153	0.0468329	-3.95837
ENSG00000111678	-0.210307	4.96984	-2.13736	0.0444411	-4.05432
ENSG00000204842	-0.147779	6.51024	-2.09227	0.0486916	-4.31072
ENSG00000166856	0.514339	0.573325	2.24661	0.0355009	-3.57605
ENSG00000061273	0.313716	2.93071	2.28442	0.0328111	-3.54478
ENSG00000134291	0.231704	3.78001	2.10729	0.0472365	-3.93701
ENSG00000152137	-0.56276	2.69323	-3.06428	0.00586893	-2.16292
ENSG00000061794	0.151841	4.63839	2.19096	0.0398269	-3.92145
ENSG00000198707	-0.188065	6.48187	-2.0837	0.0495399	-4.32584
ENSG00000134531	-0.972776	0.707767	-3.39978	0.00268811	-1.84529
ENSG00000161642	0.486798	1.87501	2.46424	0.0224052	-3.21589
ENSG00000110906	-0.262673	4.83239	-3.5892	0.00171874	-1.15778
ENSG00000123358	-1.20127	5.17262	-2.65625	0.0175201	-3.21687
ENSG00000111412	-0.246122	4.60027	-2.58708	0.017162	-3.19264
ENSG00000094914	0.263179	3.08626	2.13479	0.0446745	-3.80066
ENSG00000111641	0.233509	4.66878	2.86447	0.00925701	-2.65308
ENSG00000120837	0.166182	6.79315	2.25114	0.035168	-4.04943
ENSG00000139190	0.462343	4.95919	3.10029	0.00568483	-2.2321
ENSG00000127329	-0.464416	5.81842	-3.09737	0.00597906	-2.34755
ENSG00000177575	-1.1043	1.90965	-2.40788	0.0271803	-3.34081
ENSG00000183735	0.11799	6.47696	2.27813	0.0332452	-3.97589
ENSG00000166598	-0.369922	9.44333	-7.0757	5.4319e-07	6.36632
ENSG00000111231	0.182281	4.10829	2.17022	0.0415584	-3.87887
ENSG00000111237	0.125872	7.0495	2.18196	0.0405695	-4.19707
ENSG00000151176	0.198367	4.56734	2.30367	0.0315154	-3.71351
ENSG00000111540	0.136337	6.82742	2.30774	0.0312474	-3.94992
ENSG00000135469	0.19436	4.36005	2.5206	0.0198366	-3.285
ENSG00000174233	-0.235671	5.35112	-2.97693	0.00716996	-2.49364
ENSG00000139697	-0.146494	8.80275	-2.20059	0.0390456	-4.26738
ENSG00000150990	-0.261677	3.77702	-2.86265	0.00929514	-2.57807
ENSG00000110911	0.142672	5.08851	2.14404	0.0438407	-4.06505
ENSG00000130779	-0.131746	8.43314	-2.34783	0.0287173	-3.97514
ENSG00000111490	0.192005	6.96122	2.43169	0.024026	-3.72416
ENSG00000178878	-1.04309	2.65277	-3.15469	0.00536185	-2.07225
ENSG00000181929	-0.241411	3.65844	-2.26706	0.0340223	-3.6527
ENSG00000089248	-0.234074	6.78624	-4.36539	0.000269012	0.466652
ENSG00000111731	-0.171303	6.97685	-2.6453	0.0151016	-3.31103
ENSG00000198673	0.486385	5.49168	2.8581	0.0103	-2.80992
ENSG00000110851	0.162425	5.24204	2.60326	0.0165642	-3.23457
ENSG00000135390	0.526253	3.48631	3.36652	0.00290652	-1.57062
ENSG00000139405	-0.265497	3.34177	-2.20027	0.0390714	-3.73778
ENSG00000111348	-0.399848	2.19588	-2.27817	0.0332427	-3.51371
ENSG00000110917	-0.19164	7.04382	-2.86111	0.00932761	-2.87213
ENSG00000167548	-0.339453	6.17424	-2.30953	0.0325419	-3.91198
ENSG00000089094	-0.256069	4.55617	-2.36126	0.0279135	-3.60831
ENSG00000135679	-0.138834	6.32197	-2.11552	0.0464568	-4.25524
ENSG00000135127	-0.175773	5.30983	-2.0842	0.0494897	-4.19544
ENSG00000123095	0.480805	4.71811	4.20926	0.000391039	0.1903
ENSG00000111262	0.233466	6.63998	2.66429	0.0144818	-3.242
ENSG00000029153	0.377167	3.5996	2.65653	0.0147323	-2.95037
ENSG00000179195	-0.173686	6.33861	-2.63035	0.0156072	-3.2885
ENSG00000196498	-0.383683	4.88059	-2.28739	0.0337619	-3.80157
ENSG00000187778	0.224345	4.70345	3.02514	0.00642106	-2.33411
ENSG00000111218	0.287689	5.89222	2.52672	0.0198237	-3.45508
ENSG00000126749	-0.281093	4.72773	-3.59075	0.00171246	-1.14821
ENSG00000196876	0.174416	8.55544	2.74438	0.0121223	-3.20099
ENSG00000073614	-0.118636	7.26201	-2.6091	0.0163535	-3.39975
ENSG00000123352	0.245244	4.58798	3.1894	0.00439507	-1.9845
ENSG00000027001	0.206171	5.08954	3.32629	0.00319403	-1.73755
ENSG00000133110	-0.731285	1.37605	-2.37237	0.027435	-3.36336
ENSG00000151778	0.274949	5.31002	3.83231	0.00096381	-0.654135
ENSG00000102531	-0.13395	7.29432	-2.17067	0.0415197	-4.23314
ENSG00000136155	0.378349	2.1607	2.26022	0.0345104	-3.53669
ENSG00000136111	0.306523	3.26021	2.44622	0.0232896	-3.2983
ENSG00000102755	-0.25946	5.78835	-2.48313	0.021536	-3.5273
ENSG00000182957	-0.531571	3.80698	-2.79389	0.0112526	-2.73759
ENSG00000139734	-0.683046	2.24231	-2.41478	0.0254369	-3.3106
ENSG00000180440	0.398927	5.16684	2.2614	0.036007	-3.88314
ENSG00000102543	-0.288532	6.18864	-2.71635	0.0130626	-3.11275
ENSG00000102580	-0.280082	6.84548	-4.02346	0.000610264	-0.311391
ENSG00000122025	0.784089	2.30609	3.70776	0.00129693	-1.0361
ENSG00000178235	0.226882	7.17934	2.11488	0.0471756	-4.32884
ENSG00000172766	-0.29757	4.38646	-3.31981	0.00324284	-1.70292
ENSG00000102760	0.503366	3.37869	3.3759	0.00284325	-1.55374
ENSG00000139679	-0.323054	3.37297	-2.47036	0.0221118	-3.27301
ENSG00000151849	-0.3328	2.46475	-2.32686	0.0300162	-3.45095
ENSG00000102786	-0.26903	6.73096	-3.76528	0.0011309	-0.887629
ENSG00000185352	0.888852	2.78947	4.53721	0.000178318	0.599244
ENSG00000132938	0.205106	5.66318	2.23944	0.0360331	-3.9604
ENSG00000127870	-0.156231	6.98317	-2.70287	0.0132956	-3.1929
ENSG00000151835	0.105934	8.31458	2.12927	0.0451783	-4.37611
ENSG00000198542	0.21354	4.93631	2.50673	0.0204422	-3.38303
ENSG00000102710	-0.13878	5.85558	-2.29484	0.0321041	-3.89006
ENSG00000173141	0.200387	4.12858	2.26007	0.0345214	-3.72806
ENSG00000120658	-0.184202	5.97557	-2.09001	0.0489137	-4.26642
ENSG00000179630	0.450253	3.17412	3.368	0.00289645	-1.57477
ENSG00000136153	0.361456	7.20142	4.63511	0.00014113	1.061
ENSG00000244754	-0.11033	7.54338	-2.08995	0.0489196	-4.39206
ENSG00000169062	0.246475	5.13504	2.80625	0.0105544	-2.81776
ENSG00000120694	-0.42294	8.30139	-3.22078	0.00463415	-2.25717
ENSG00000139793	0.116956	8.52032	2.45293	0.0229562	-3.7816
ENSG00000136110	0.854278	0.482341	2.12648	0.0456318	-3.7348
ENSG00000151413	0.383213	2.86047	2.73243	0.0124494	-2.76722
ENSG00000073712	-0.166777	6.36481	-2.20334	0.0388247	-4.09993
ENSG00000129480	0.352964	3.58427	3.39311	0.00273059	-1.51741
ENSG00000100625	0.802627	-0.163551	2.367	0.0275757	-3.48729
ENSG00000180008	-0.202428	5.14873	-2.19265	0.0396886	-3.99155
ENSG00000129521	0.469954	2.97288	3.66573	0.00143326	-1.01254
ENSG00000170345	-1.79978	4.56091	-2.71355	0.0157195	-3.05416
ENSG00000140044	0.35515	4.3046	2.40324	0.0257417	-3.50343
ENSG00000042317	0.188308	5.65776	2.59142	0.0169997	-3.30326
ENSG00000176435	-0.551159	2.65538	-2.24222	0.0363244	-3.60991
ENSG00000070778	-0.305922	3.31991	-2.25045	0.0352184	-3.65182
ENSG00000198894	0.269431	6.75259	2.75615	0.0119026	-3.06832
ENSG00000070269	-0.198596	5.55709	-2.29664	0.0319828	-3.84978
ENSG00000259431	0.321905	3.24361	2.92866	0.00800349	-2.41797
ENSG00000119705	-0.79105	1.95047	-3.03829	0.0062302	-2.26927
ENSG00000119703	0.543803	1.84989	2.41934	0.0246694	-3.28669
ENSG00000185271	-0.269013	2.46632	-2.07994	0.0499158	-3.83854
ENSG00000165959	-0.258397	6.08066	-2.2235	0.0377568	-4.04701
ENSG00000100567	0.22667	7.04101	2.64897	0.01498	-3.30872
ENSG00000100711	0.390366	3.10352	2.81987	0.0102362	-2.6145
ENSG00000119650	0.354253	2.66071	2.62016	0.015961	-2.96166
ENSG00000100554	0.163159	7.92066	2.52641	0.0195882	-3.60322
ENSG00000100441	-0.196142	4.75779	-2.18294	0.0404887	-3.95206
ENSG00000129467	-0.66334	0.980844	-2.87792	0.00897973	-2.62541
ENSG00000227051	-0.246792	7.14218	-2.45179	0.0233368	-3.70643
ENSG00000157227	-0.532948	2.72379	-2.58292	0.0173188	-3.03192
ENSG00000140092	-0.69085	1.46921	-2.36398	0.0277955	-3.37321
ENSG00000100490	0.298849	4.87711	4.42183	0.000235005	0.651855
ENSG00000139998	-0.132851	7.66993	-2.09502	0.0484219	-4.38785
ENSG00000177108	-0.277469	6.43794	-2.8632	0.00929961	-2.82299
ENSG00000184887	0.181604	4.69493	2.40503	0.0254346	-3.54127
ENSG00000100478	0.227393	5.36732	2.7598	0.0117119	-2.93567
ENSG00000090060	-0.205461	7.31326	-3.32716	0.00318747	-1.89596
ENSG00000100836	-0.267054	4.65055	-2.63613	0.0154098	-3.10171
ENSG00000119698	0.300646	6.07676	3.21034	0.00418638	-2.06482
ENSG00000126803	0.160763	5.79621	2.39611	0.0259221	-3.69067
ENSG00000125375	0.214522	3.89865	2.17991	0.0407408	-3.83721
ENSG00000181619	0.238835	4.3451	2.2799	0.0331227	-3.72217
ENSG00000165521	-0.176703	7.60363	-2.69198	0.0136207	-3.25554
ENSG00000100591	-0.296114	6.66925	-4.45269	0.00021827	0.668787
ENSG00000071537	-0.172271	8.36732	-3.18827	0.00440668	-2.24732
ENSG00000176903	-0.393341	2.91005	-2.50234	0.0206372	-3.18144
ENSG00000165555	-0.489645	1.31612	-2.78887	0.0109741	-2.72492
ENSG00000168952	0.374072	7.39298	3.04746	0.00662637	-2.55871
ENSG00000092148	-0.139445	8.99637	-2.93234	0.00793686	-2.82762
ENSG00000185246	-0.185524	7.15251	-2.84256	0.00972629	-2.91879
ENSG00000066629	-0.218456	6.12787	-3.42722	0.0025201	-1.59872
ENSG00000089775	0.239783	3.67349	2.61485	0.0161482	-3.03253
ENSG00000100767	0.594733	1.49428	2.11194	0.0467941	-3.73703
ENSG00000100433	-0.345561	5.43526	-3.81287	0.00100958	-0.70839
ENSG00000185650	-0.618548	1.65977	-3.54121	0.00192562	-1.43187
ENSG00000137801	-1.27015	1.79099	-4.53964	0.00018617	0.346936
ENSG00000159248	0.354056	2.47336	2.11596	0.0464154	-3.77229
ENSG00000074410	0.422623	3.02925	3.07239	0.00576053	-2.1445
ENSG00000156642	0.121945	8.87882	2.17019	0.0415604	-4.33213
ENSG00000178802	0.167494	5.01375	2.65094	0.0149151	-3.1124
ENSG00000140382	-0.123019	6.73455	-2.11434	0.0465677	-4.2926
ENSG00000137764	0.249597	4.94451	3.10822	0.00530384	-2.18523
ENSG00000173546	-0.367784	3.63752	-2.12322	0.0459442	-3.90266
ENSG00000137824	-0.271863	5.67068	-5.23719	3.38828e-05	2.43765
ENSG00000166073	0.291648	3.28029	2.19512	0.0394872	-3.72543
ENSG00000184254	-1.33857	2.58058	-3.86062	0.00113383	-0.807923
ENSG00000166477	-0.200306	5.33883	-2.19976	0.0391119	-3.99575
ENSG00000170776	-0.261687	6.4359	-2.76584	0.0115548	-3.02503
ENSG00000166946	0.148815	6.08726	2.30472	0.0314459	-3.88972
ENSG00000186417	0.698882	0.689589	2.41189	0.025065	-3.35609
ENSG00000140280	0.235185	5.28169	3.05323	0.00602003	-2.33072
ENSG00000140543	-0.35088	1.81519	-2.28885	0.0325091	-3.48601
ENSG00000137877	0.954907	0.77811	2.51966	0.0200114	-3.20527
ENSG00000103710	-0.543217	1.01881	-2.6929	0.0135931	-2.90589
ENSG00000131873	-0.193833	4.50908	-2.32657	0.0300345	-3.66515
ENSG00000103811	-0.350057	2.73145	-2.10639	0.0473225	-3.8195
ENSG00000069966	0.135645	6.88474	2.34244	0.029046	-3.8842
ENSG00000104064	-0.170433	4.56608	-2.11105	0.0468784	-4.05288
ENSG00000140470	-0.34264	2.65968	-2.2015	0.0389726	-3.6658
ENSG00000183475	0.164575	4.9329	2.17936	0.0407865	-3.98417
ENSG00000166192	-0.204402	4.24405	-2.21169	0.0381624	-3.8373
ENSG00000128872	-0.11171	10.2418	-2.57511	0.0176171	-3.62591
ENSG00000166147	-0.642316	3.83757	-3.01492	0.00709698	-2.33439
ENSG00000198690	-0.341225	3.69752	-2.66556	0.0144412	-2.94937
ENSG00000213614	-0.218336	5.5665	-3.24317	0.00387847	-1.95596
ENSG00000140575	-0.228385	5.77942	-2.38118	0.0267584	-3.7198
ENSG00000179335	-0.170159	5.43465	-2.78701	0.0110201	-2.8881
ENSG00000230778	0.666668	4.48531	5.02489	5.58795e-05	1.93014
ENSG00000128944	-0.641209	0.529698	-2.51047	0.0202769	-3.21137
ENSG00000140563	0.682844	1.7998	2.48918	0.0212327	-3.17985
ENSG00000167004	-0.265533	7.52052	-2.32768	0.0308767	-3.97281
ENSG00000169758	0.461208	2.04059	2.82274	0.0101704	-2.62665
ENSG00000168781	-0.159063	7.14077	-2.93456	0.00789692	-2.72459
ENSG00000180304	0.15363	6.40027	2.1005	0.0478897	-4.28931
ENSG00000187720	-0.384854	4.30666	-2.42352	0.024878	-3.47463
ENSG00000140538	-0.324524	8.37722	-3.31272	0.00344472	-2.00935
ENSG00000140545	-0.182878	6.78922	-2.13406	0.0447402	-4.26242
ENSG00000128965	0.562364	1.83661	2.32327	0.0302439	-3.43293
ENSG00000260916	-0.376878	2.78814	-2.26585	0.0341083	-3.57063
ENSG00000171262	-0.360221	4.46925	-3.71291	0.00128113	-0.875644
ENSG00000140367	0.158267	6.98856	2.38574	0.0265004	-3.81643
ENSG00000137843	0.2865	5.72146	2.41885	0.0250252	-3.64383
ENSG00000182175	0.34674	3.27093	2.09084	0.0488321	-3.89289
ENSG00000140299	-0.203471	5.88547	-2.46719	0.0222633	-3.5663
ENSG00000140553	-0.372058	4.47459	-4.20893	0.000391349	0.190259
ENSG00000173575	-0.210858	7.46391	-3.00027	0.00679733	-2.60604
ENSG00000162104	0.167457	6.56192	2.71873	0.012835	-3.12728
ENSG00000103381	0.186482	5.2784	2.36195	0.0278725	-3.69526
ENSG00000090905	-0.175733	6.96657	-2.51309	0.0201624	-3.56879
ENSG00000153443	-0.375992	4.04182	-2.71439	0.0129595	-2.89229
ENSG00000156968	0.151883	6.52356	2.97857	0.00714306	-2.5906
ENSG00000166123	0.219765	5.68376	3.32864	0.00317646	-1.78158
ENSG00000129636	0.127087	8.40244	2.24957	0.0352835	-4.15813
ENSG00000167186	0.290586	4.3452	3.24194	0.00388958	-1.8551
ENSG00000103460	0.43556	3.25937	2.5988	0.016727	-3.02963
ENSG00000103047	0.486824	2.40998	3.20516	0.00423709	-1.93358
ENSG00000140937	-0.192906	7.96302	-2.8832	0.00887308	-2.8758
ENSG00000103335	-0.305419	2.47167	-2.19221	0.0397244	-3.66443
ENSG00000196118	0.599755	2.60339	4.03755	0.000590015	-0.364885
ENSG00000103496	-0.361507	4.45269	-2.86818	0.00917966	-2.62806
ENSG00000176476	0.275122	2.66588	2.4348	0.0238668	-3.27562
ENSG00000169592	-0.214755	3.96689	-2.18643	0.0401995	-3.83934
ENSG00000166822	-0.463916	2.06711	-2.37652	0.0270249	-3.35574
ENSG00000034713	0.190537	6.0324	2.77713	0.0112665	-2.96765
ENSG00000140691	-0.433799	1.99485	-2.40144	0.0256297	-3.31491
ENSG00000174939	-0.32764	2.49515	-2.76179	0.0116601	-2.71313
ENSG00000103043	0.213144	4.00761	2.0861	0.0493007	-4.00946
ENSG00000153060	0.903168	2.95251	4.45373	0.000217726	0.492985
ENSG00000162065	0.149069	7.19538	2.19496	0.0395007	-4.18284
ENSG00000103245	0.166438	3.98248	2.08814	0.049099	-3.9997
ENSG00000197912	0.15443	5.6615	2.81621	0.0103207	-2.85313
ENSG00000205336	-0.35256	4.41863	-2.34437	0.029276	-3.62617
ENSG00000140854	0.175923	5.09335	2.55623	0.0183582	-3.30682
ENSG00000083799	-0.122547	8.51733	-2.1723	0.0413812	-4.30845
ENSG00000159713	-0.290003	4.41661	-2.34308	0.0290072	-3.62223
ENSG00000132612	0.122151	6.7888	2.08059	0.0498507	-4.35276
ENSG00000179776	-0.494269	2.88182	-2.53	0.0194362	-3.13129
ENSG00000140995	-0.132855	4.85843	-2.16395	0.0420947	-3.99673
ENSG00000125166	0.254284	6.70884	3.91173	0.00079727	-0.559339
ENSG00000159579	-0.110883	5.67206	-2.11357	0.0466403	-4.19208
ENSG00000213853	-0.28911	3.64989	-2.35595	0.0282285	-3.50066
ENSG00000229809	0.43099	2.30592	2.25321	0.0350174	-3.5524
ENSG00000182831	-0.117375	7.0948	-2.31704	0.030643	-3.95387
ENSG00000166592	-0.833463	0.456461	-3.13341	0.00500394	-2.32996
ENSG00000102897	0.237197	3.46864	2.25856	0.0346297	-3.64399
ENSG00000132613	-0.240673	5.96032	-2.25675	0.0349123	-3.96876
ENSG00000157106	-0.224713	8.61758	-3.841	0.000944032	-0.804638
ENSG00000103363	0.428571	4.90457	4.60252	0.000152549	1.04558
ENSG00000167962	-0.246	3.98614	-2.57265	0.0177122	-3.15253
ENSG00000103319	0.211281	5.43089	2.80361	0.0106171	-2.8528
ENSG00000103034	0.148862	10.243	2.73567	0.01236	-3.29863
ENSG00000168807	0.405117	5.4918	2.70244	0.0140607	-3.09392
ENSG00000141098	-0.253026	3.98861	-2.54268	0.018908	-3.203
ENSG00000159753	-0.388693	1.99363	-2.19061	0.0398554	-3.64082
ENSG00000158805	-0.237629	3.33358	-2.27588	0.0334018	-3.60308
ENSG00000198931	-0.236449	3.29387	-2.15889	0.0425322	-3.79931
ENSG00000167515	0.236434	4.48512	2.73389	0.012409	-2.8922
ENSG00000140694	0.173475	5.273	2.30077	0.0317074	-3.80576
ENSG00000197943	0.544886	2.10002	3.55187	0.00187765	-1.36022
ENSG00000180185	0.197112	4.20909	2.20788	0.0384629	-3.82755
ENSG00000102908	-0.20224	7.28704	-2.57857	0.0174844	-3.46231
ENSG00000205937	0.202511	6.40366	3.19343	0.00435418	-2.1271
ENSG00000078328	0.356218	7.98209	2.95797	0.00807872	-2.77037
ENSG00000162076	0.951772	0.506689	3.03372	0.00629589	-2.5208
ENSG00000167858	-0.654512	0.577237	-2.79913	0.0107246	-2.7983
ENSG00000074370	-0.675544	2.07831	-3.51343	0.00205634	-1.40007
ENSG00000108599	-0.201748	6.07997	-3.59239	0.00170582	-1.23391
ENSG00000141756	0.456834	1.6601	2.59985	0.0166887	-3.01282
ENSG00000188895	-0.191255	7.33235	-3.78948	0.00106752	-0.861186
ENSG00000126368	0.307715	4.94581	2.74886	0.0120016	-2.91597
ENSG00000173991	0.915862	0.603976	2.22873	0.0371507	-3.60594
ENSG00000108423	-0.513189	2.84654	-3.72879	0.00123359	-0.888431
ENSG00000154229	0.238096	7.48614	2.26187	0.0349953	-4.08792
ENSG00000011258	-0.251228	5.70146	-3.21118	0.00417823	-2.03603
ENSG00000166263	-0.163561	5.11674	-2.32277	0.0302757	-3.75189
ENSG00000166292	-0.318393	3.4002	-2.44331	0.0234354	-3.32604
ENSG00000004142	0.128781	5.87091	2.09478	0.0484457	-4.24147
ENSG00000132386	-0.553439	2.57611	-2.15975	0.0430371	-3.73339
ENSG00000125398	-0.319924	3.60182	-2.77343	0.0113604	-2.73681
ENSG00000181291	0.472609	2.07937	2.49958	0.0207606	-3.15717
ENSG00000167740	0.255457	3.75789	2.60876	0.0163657	-3.05278
ENSG00000133030	-0.168057	8.86504	-2.24262	0.0357959	-4.19489
ENSG00000065559	0.13908	8.08164	2.25689	0.0347501	-4.12652
ENSG00000125430	0.756541	0.723727	2.54954	0.0186279	-3.16493
ENSG00000161542	-0.199102	4.44495	-2.49623	0.0209115	-3.3434
ENSG00000129657	0.301857	7.43107	3.78805	0.00107115	-0.870022
ENSG00000182963	-0.477479	2.21886	-2.56909	0.0178504	-3.04372
ENSG00000127804	-0.177076	6.33684	-2.08931	0.0489832	-4.30449
ENSG00000121058	0.17208	4.53947	2.19621	0.0393987	-3.89478
ENSG00000121064	-0.282275	3.60652	-2.43321	0.0239483	-3.36093
ENSG00000108352	0.151116	6.46867	2.18244	0.0405296	-4.15161
ENSG00000186834	-0.299659	5.65504	-3.52924	0.00198093	-1.3428
ENSG00000188612	0.489982	5.8779	2.40846	0.0274381	-3.71973
ENSG00000108666	0.133946	7.24424	2.59768	0.0167683	-3.42368
ENSG00000108298	0.4529	6.67361	2.27022	0.0363866	-4.04374
ENSG00000132382	-0.193612	5.32722	-2.71211	0.0130254	-3.02943
ENSG00000037042	0.359622	4.0097	2.81891	0.0102584	-2.67763
ENSG00000167900	-0.82642	1.23508	-3.38707	0.00276963	-1.75967
ENSG00000141736	-0.504752	0.638584	-2.28695	0.0326385	-3.51067
ENSG00000006062	-0.660662	1.56043	-3.1585	0.00472161	-2.09272
ENSG00000213424	0.396833	6.1364	4.20069	0.000399159	0.122805
ENSG00000108622	-0.688893	0.733423	-2.86641	0.0092166	-2.67901
ENSG00000161654	0.182687	5.20603	2.40645	0.0253576	-3.60656
ENSG00000161664	0.786909	-0.0237147	2.52899	0.0194791	-3.28179
ENSG00000197063	-0.2083	6.05068	-3.13084	0.00503382	-2.23333
ENSG00000185624	-0.18179	6.99232	-2.52714	0.0195573	-3.54518
ENSG00000166750	-0.390306	3.39733	-2.78974	0.0109528	-2.68963
ENSG00000132510	-0.483479	2.39826	-2.45867	0.0226748	-3.23063
ENSG00000121060	-0.635416	2.32007	-4.14407	0.000457159	-0.192477
ENSG00000141560	0.205608	5.2807	2.42612	0.0243141	-3.5728
ENSG00000167363	0.228789	4.61714	2.31264	0.0309273	-3.70233
ENSG00000132589	0.136197	6.37374	2.08272	0.0496378	-4.3117
ENSG00000167862	0.256563	4.99058	3.30281	0.00337438	-1.7796
ENSG00000108389	0.195825	6.9513	2.16402	0.0420904	-4.21952
ENSG00000161940	-0.572935	1.4547	-2.56025	0.018198	-3.07597
ENSG00000153822	-0.243686	5.46008	-2.4584	0.0226882	-3.53865
ENSG00000132388	0.263132	6.15268	3.3962	0.00271086	-1.67008
ENSG00000170049	0.71204	3.58652	3.91186	0.000818094	-0.488128
ENSG00000169718	-0.203325	4.45521	-2.2453	0.0355978	-3.80123
ENSG00000108840	-0.172476	6.24057	-2.27498	0.0334644	-3.95405
ENSG00000167549	0.555241	2.29681	2.09824	0.0483748	-3.78798
ENSG00000277200	0.317179	3.90049	2.30714	0.0312865	-3.61275
ENSG00000126861	0.255825	6.57338	2.55124	0.0187111	-3.46719
ENSG00000179314	-0.295516	5.9641	-2.17221	0.0424898	-4.12358
ENSG00000131467	0.154509	6.22195	2.15321	0.0430289	-4.17932
ENSG00000074660	0.678959	0.648405	2.58485	0.017246	-3.12441
ENSG00000055483	-0.206857	4.96418	-3.09115	0.00551679	-2.22462
ENSG00000277972	0.469585	2.38064	2.41989	0.0246405	-3.28845
ENSG00000277791	0.359961	5.08109	2.68202	0.0142258	-3.07334
ENSG00000273559	-0.364827	4.8566	-4.16312	0.00043676	0.0866891
ENSG00000108523	0.168831	5.3406	2.41514	0.0248917	-3.60121
ENSG00000141349	0.280072	3.71781	2.33003	0.0298162	-3.55012
ENSG00000259207	-0.395473	2.71283	-2.32178	0.0303387	-3.47605
ENSG00000232859	0.135923	5.9105	2.1208	0.045962	-4.20376
ENSG00000178691	-0.155504	6.00666	-2.27089	0.0337519	-3.94462
ENSG00000108384	-0.32558	2.5708	-2.2696	0.0338427	-3.54771
ENSG00000213246	0.182926	4.47367	2.21662	0.0377759	-3.85144
ENSG00000178971	0.214575	4.70207	2.9406	0.00778901	-2.5065
ENSG00000141279	-0.14806	7.10006	-2.34327	0.0289955	-3.90442
ENSG00000005100	0.131455	5.58426	2.10833	0.047138	-4.18614
ENSG00000186868	-0.106538	8.70525	-2.5168	0.0200008	-3.65925
ENSG00000176749	0.169645	8.16766	2.25295	0.0350359	-4.13876
ENSG00000172794	0.779567	-0.348777	2.62973	0.0156287	-3.20053
ENSG00000087111	0.246673	4.01888	3.01721	0.00653879	-2.2896
ENSG00000141582	0.270696	4.43235	3.48051	0.00222259	-1.36389
ENSG00000175832	-0.580755	1.64559	-3.08455	0.00560145	-2.20534
ENSG00000231824	0.446923	2.50221	2.37294	0.0272309	-3.36878
ENSG00000081138	0.446088	6.03735	2.6695	0.0155702	-3.23127
ENSG00000141668	0.501636	5.27913	2.77471	0.0123763	-2.94502
ENSG00000166342	0.229433	5.98343	2.36878	0.0274722	-3.76146
ENSG00000141384	0.302334	3.1775	2.19287	0.0396711	-3.71785
ENSG00000153391	0.187273	4.23687	2.33889	0.0292646	-3.59995
ENSG00000074657	-0.135148	6.64628	-2.14163	0.0440563	-4.23561
ENSG00000141446	-0.136902	6.43068	-2.18335	0.0404545	-4.14412
ENSG00000177150	0.168779	6.63514	2.83399	0.00991584	-2.90308
ENSG00000101654	0.106792	7.34781	2.11491	0.046514	-4.33705
ENSG00000118680	-0.419133	5.10592	-2.97317	0.00750546	-2.49359
ENSG00000141404	0.302308	6.90705	3.53457	0.00195611	-1.41434
ENSG00000082397	0.181348	7.56004	2.7806	0.0111795	-3.06957
ENSG00000171451	-0.213521	6.76455	-2.68048	0.0139722	-3.22351
ENSG00000101544	-0.156787	5.21709	-2.34799	0.0287076	-3.71409
ENSG00000178184	-0.406111	2.08702	-2.34551	0.0288586	-3.40393
ENSG00000178342	0.60379	1.24157	2.85931	0.00936542	-2.63779
ENSG00000101605	-0.66098	2.70534	-3.26422	0.00369268	-1.78815
ENSG00000167216	-0.360075	3.18719	-2.40933	0.0252022	-3.36744
ENSG00000152229	0.471952	2.89345	2.5094	0.0203241	-3.16154
ENSG00000166401	0.5292	4.10679	4.16314	0.000436739	0.0840948
ENSG00000167306	0.354332	5.97956	2.33039	0.0312136	-3.8531
ENSG00000168675	-0.259521	5.47325	-3.3743	0.00285397	-1.66726
ENSG00000130856	-0.163002	6.17368	-2.33119	0.0297437	-3.85092
ENSG00000125827	0.123014	9.4176	2.79094	0.0109234	-3.14737
ENSG00000125845	-0.659555	1.75056	-2.87391	0.00906156	-2.54972
ENSG00000101463	0.397908	4.08053	2.09263	0.0496473	-4.01018
ENSG00000125870	0.17339	5.95	2.08982	0.0489331	-4.26166
ENSG00000089057	0.185992	7.57457	2.72022	0.0127924	-3.19409
ENSG00000198959	-0.54001	2.65997	-2.58826	0.0171176	-3.01906
ENSG00000054793	-0.117382	8.4634	-2.18921	0.0399702	-4.26887
ENSG00000101079	0.264846	9.1558	4.58625	0.000158595	0.88989
ENSG00000171703	0.266638	5.09721	3.58707	0.00172746	-1.17903
ENSG00000101413	-0.151775	5.59822	-2.0968	0.0482485	-4.20913
ENSG00000124193	-0.127453	7.19651	-2.26314	0.0343014	-4.05853
ENSG00000125821	0.233268	5.63518	3.43517	0.00247332	-1.54454
ENSG00000130703	0.221905	6.02939	3.60922	0.00163905	-1.19256
ENSG00000125863	-0.410757	4.08604	-4.43239	0.000229138	0.654958
ENSG00000125869	0.555326	6.40831	2.24064	0.0391512	-4.07621
ENSG00000125775	0.855421	1.27589	3.65515	0.00146975	-1.39872
ENSG00000124098	0.28052	3.19844	2.18445	0.0403634	-3.73282
ENSG00000101336	-0.488306	1.04352	-2.30087	0.0317006	-3.47357
ENSG00000064601	0.174195	5.58835	2.10874	0.0470987	-4.18609
ENSG00000124160	-0.207038	5.86678	-3.72657	0.00124013	-0.924245
ENSG00000197114	-0.241153	5.59232	-3.60883	0.00164059	-1.16533
ENSG00000075043	-0.217078	8.592	-3.82716	0.000975736	-0.83301
ENSG00000149451	1.82084	0.139207	2.41043	0.0270127	-3.44487
ENSG00000125844	-0.227013	5.23559	-2.28458	0.0328002	-3.83559
ENSG00000100983	-0.246123	3.47662	-2.26786	0.0339654	-3.63687
ENSG00000100997	0.189491	7.60854	4.06308	0.000555029	-0.253683
ENSG00000125971	0.250851	6.28343	2.19621	0.0399595	-4.11443
ENSG00000101003	0.566365	0.686897	2.16054	0.0423891	-3.68228
ENSG00000101294	-0.174001	5.51983	-2.18963	0.0399356	-4.0392
ENSG00000130589	-0.613473	1.81478	-2.76223	0.0116487	-2.72978
ENSG00000124134	0.446926	2.92317	2.25781	0.034684	-3.58187
ENSG00000101109	-0.113076	6.38814	-2.33088	0.0297633	-3.87091
ENSG00000125885	0.301449	3.43152	3.01629	0.00655254	-2.2575
ENSG00000196132	-0.257396	4.70129	-2.16677	0.0418525	-3.977
ENSG00000125810	-0.612859	3.64381	-2.95878	0.00786102	-2.41353
ENSG00000125772	0.421688	7.41468	4.95758	6.55315e-05	1.78889
ENSG00000101152	0.0891139	8.50315	2.18015	0.0407205	-4.29167
ENSG00000132639	0.219292	11.3971	2.73439	0.0124048	-3.3483
ENSG00000064666	-0.689676	1.31683	-2.72349	0.0126998	-2.82855
ENSG00000130254	-0.238942	5.80053	-2.51601	0.020035	-3.4633
ENSG00000167785	0.360826	2.0139	2.32252	0.0302916	-3.43635
ENSG00000105401	-0.185267	6.46183	-2.12441	0.0456261	-4.24697
ENSG00000123146	-0.478949	2.21329	-2.4064	0.0253604	-3.31162
ENSG00000105393	0.153389	5.45807	2.37614	0.0270463	-3.6894
ENSG00000181027	0.205611	4.80179	2.1635	0.0421331	-3.9868
ENSG00000063322	0.39313	2.20356	2.11187	0.0468011	-3.75892
ENSG00000182013	-0.204034	7.93414	-3.42375	0.00254072	-1.70916
ENSG00000105053	-0.221181	3.34719	-2.47877	0.0217149	-3.25597
ENSG00000213023	0.278494	3.82172	2.61458	0.0161579	-3.04465
ENSG00000130164	-0.623084	4.8957	-2.64905	0.0166576	-3.16586
ENSG00000042753	0.159141	5.39692	2.23186	0.0366037	-3.94512
ENSG00000105552	-0.343245	3.22421	-2.57492	0.0176247	-3.0741
ENSG00000108107	0.336691	4.38978	3.2222	0.0040725	-1.90153
ENSG00000080573	0.479557	1.15078	2.65239	0.0148674	-2.97049
ENSG00000130810	-0.191356	3.51133	-2.16842	0.0417119	-3.8098
ENSG00000167600	0.985992	-0.2406	2.78609	0.0110428	-2.99153
ENSG00000105649	0.135225	7.8847	2.1239	0.0456735	-4.35295
ENSG00000267855	0.218118	4.91602	2.50944	0.0203225	-3.37653
ENSG00000105516	0.640461	4.43902	3.34306	0.0034177	-1.72281
ENSG00000176920	0.812884	0.627782	2.63815	0.0153415	-3.05324
ENSG00000187266	0.724912	0.282944	2.21563	0.0378532	-3.63765
ENSG00000130176	-0.890168	0.213023	-2.27706	0.0334059	-3.54408
ENSG00000126456	-0.334147	3.56126	-2.27539	0.0334361	-3.6353
ENSG00000142409	0.224257	3.62984	2.35053	0.0285544	-3.50197
ENSG00000099795	0.247418	5.91617	2.71836	0.0128455	-3.07449
ENSG00000104980	0.164386	5.93981	2.92135	0.00813753	-2.66246
ENSG00000032444	-0.182122	5.48647	-2.27317	0.0335911	-3.8836
ENSG00000011304	-0.355256	3.6235	-2.47305	0.0219841	-3.29801
ENSG00000104774	0.188169	4.90514	2.50571	0.0204874	-3.38612
ENSG00000198356	0.193254	5.51724	2.82484	0.0101224	-2.81797
ENSG00000171223	-1.4068	4.7049	-2.75664	0.0143094	-2.98477
ENSG00000095066	0.231736	4.40001	2.38226	0.0266976	-3.54651
ENSG00000141933	0.247462	2.90639	2.11372	0.0466256	-3.81792
ENSG00000126457	-0.200328	4.76054	-2.85745	0.00940502	-2.67899
ENSG00000179218	-0.302701	8.98702	-3.96037	0.000709711	-0.542837
ENSG00000170906	0.215297	5.83147	2.24404	0.0356904	-3.97027
ENSG00000167608	-0.511955	2.17454	-3.19137	0.0043751	-1.96589
ENSG00000257103	-0.288508	6.01943	-3.80342	0.00103261	-0.763756
ENSG00000221983	-0.373378	2.4417	-2.28035	0.0330916	-3.51688
ENSG00000127511	-0.154614	6.89069	-2.44797	0.0232022	-3.68759
ENSG00000105711	0.348197	6.51296	3.01683	0.00682383	-2.53433
ENSG00000142544	0.462289	2.24232	3.21504	0.00414087	-1.93353
ENSG00000099622	0.351964	5.5884	3.3509	0.00301501	-1.72072
ENSG00000008441	-0.308758	6.14073	-2.18984	0.0412166	-4.11377
ENSG00000062822	0.471417	1.53803	2.29197	0.0322976	-3.48118
ENSG00000088247	-0.167805	5.65117	-2.35868	0.0280662	-3.74701
ENSG00000130725	0.248866	5.57557	2.49042	0.0211757	-3.48508
ENSG00000105642	0.255885	3.38431	2.28968	0.0324522	-3.58008
ENSG00000161888	0.524731	0.244451	2.12026	0.0460123	-3.7507
ENSG00000153879	-0.192111	6.12971	-2.87198	0.00910119	-2.7805
ENSG00000220008	0.386176	2.7661	2.4506	0.0230716	-3.25441
ENSG00000229833	0.230241	5.18155	2.22425	0.0371848	-3.93289
ENSG00000188493	-0.333929	2.78902	-2.27113	0.0337347	-3.56463
ENSG00000115257	0.750091	0.507486	2.08061	0.0498487	-3.78962
ENSG00000090013	-0.642275	1.73607	-3.50672	0.00208922	-1.46906
ENSG00000105568	0.150382	7.83037	2.37201	0.0272846	-3.89527
ENSG00000120784	0.304959	4.12181	3.05356	0.00601539	-2.22221
ENSG00000167460	-0.286046	5.22834	-2.42724	0.0243473	-3.57141
ENSG00000100354	-0.124538	7.88878	-2.12745	0.0453453	-4.35286
ENSG00000100347	-0.131625	6.01211	-2.27443	0.0335032	-3.93793
ENSG00000186654	0.85302	0.733491	3.51684	0.00203987	-1.7647
ENSG00000130638	0.137451	7.93659	2.22883	0.0368341	-4.17124
ENSG00000100362	1.09045	3.51332	3.66713	0.00175491	-1.11643
ENSG00000159873	-0.344151	4.78942	-3.45543	0.00235803	-1.4413
ENSG00000100271	0.184675	5.31461	2.25397	0.0349622	-3.89718
ENSG00000128245	0.277514	9.10164	2.97226	0.00742944	-2.76452
ENSG00000219438	0.239168	5.72875	2.09727	0.0485096	-4.22536
ENSG00000100030	0.12357	9.4927	2.47328	0.0219734	-3.79364
ENSG00000131100	0.179384	8.43788	2.49606	0.0209194	-3.68783
ENSG00000184164	-0.406733	4.02973	-3.08944	0.00553862	-2.1517
ENSG00000099901	0.230317	5.40392	2.80255	0.0106424	-2.85544
ENSG00000185386	-0.296868	4.77461	-2.11017	0.0473962	-4.07974
ENSG00000100147	-0.293162	3.31911	-2.32846	0.0299154	-3.51506
ENSG00000133424	-0.135552	7.84329	-2.22509	0.0371198	-4.17187
ENSG00000100142	0.269602	4.28452	3.4412	0.00243845	-1.43802
ENSG00000128298	0.979855	-0.100269	2.77047	0.0114359	-2.99687
ENSG00000128228	-0.520862	2.7771	-2.99266	0.00691681	-2.29427
ENSG00000100285	0.429018	4.61163	2.19384	0.0411907	-3.92204
ENSG00000184117	0.124467	5.98582	2.17914	0.0408056	-4.10507
ENSG00000100003	0.355504	4.4641	2.72536	0.0126471	-2.90425
ENSG00000100280	0.181844	6.90422	3.15939	0.00471188	-2.23396
ENSG00000184113	-0.739879	3.95511	-3.15769	0.00534077	-2.08508
ENSG00000100345	-0.29758	6.78971	-3.03492	0.00635916	-2.49579
ENSG00000128272	-0.127746	7.11998	-2.12103	0.0459402	-4.30764
ENSG00000198832	0.260316	3.99492	2.60067	0.0166585	-3.09462
ENSG00000100206	-0.712011	0.761396	-3.58386	0.00174065	-1.5713
ENSG00000100380	-0.130033	8.30125	-2.6976	0.0134519	-3.27884
ENSG00000138942	0.182497	4.45531	2.18913	0.0399766	-3.89703
ENSG00000100350	0.342963	4.11753	2.38977	0.0262744	-3.49357
ENSG00000100242	0.231112	4.28045	2.22506	0.0371224	-3.80972
ENSG00000100320	-0.188659	8.62056	-3.4666	0.00229674	-1.6455
ENSG00000250479	0.205556	4.83295	2.08082	0.0498282	-4.13463
ENSG00000100399	0.43101	1.67987	2.72876	0.0125516	-2.80645
ENSG00000128285	0.409792	3.36485	2.98845	0.00698365	-2.3067
ENSG00000100201	-0.123047	9.0014	-2.20803	0.0384513	-4.26768
ENSG00000128191	-0.144839	5.73444	-2.3946	0.0260056	-3.68889
ENSG00000100401	-0.128746	7.84476	-2.61031	0.0163101	-3.42703
ENSG00000100376	-0.193095	4.73846	-2.26185	0.0343932	-3.81237
ENSG00000077942	-0.446112	2.2694	-2.13332	0.0448078	-3.74475
ENSG00000154639	-0.181129	6.11945	-2.4585	0.0226831	-3.60954
ENSG00000243927	-0.300767	4.11455	-2.79398	0.010849	-2.74143
ENSG00000198743	-0.584559	7.51184	-5.89446	8.63558e-06	3.73748
ENSG00000156304	-0.211339	4.44375	-2.11703	0.0463145	-4.02739
ENSG00000157542	-0.258312	5.01387	-3.12357	0.00511911	-2.15934
ENSG00000173276	-0.240567	5.25583	-3.25941	0.00373438	-1.89529
ENSG00000154640	-0.256778	4.15012	-2.7627	0.0116362	-2.80709
ENSG00000155307	0.658533	1.84209	2.778	0.0112447	-2.72008
ENSG00000160200	-0.35385	4.10197	-2.19293	0.0400445	-3.85069
ENSG00000154734	-1.25322	3.99211	-3.00755	0.00824433	-2.44494
ENSG00000154727	-0.187435	5.90049	-2.39043	0.0262374	-3.71198
ENSG00000185272	0.335304	3.60548	3.7429	0.00119283	-0.80819
ENSG00000155304	-0.148405	6.95181	-2.14366	0.0438746	-4.26059
ENSG00000185658	-0.136434	8.22991	-2.28027	0.0330971	-4.08986
ENSG00000182240	0.875622	1.37539	2.4757	0.0222328	-3.22302
ENSG00000160191	0.424853	4.06004	2.76664	0.0115968	-2.78528
ENSG00000141959	-0.126309	7.34472	-2.69928	0.013402	-3.22158
ENSG00000186866	-0.206929	3.95791	-2.31168	0.0309901	-3.61994
ENSG00000160285	-0.323444	5.81753	-2.9979	0.00688292	-2.49735
ENSG00000160310	-0.367136	5.97657	-5.17453	3.92598e-05	2.30097
ENSG00000197381	0.209963	7.11135	2.74389	0.0121356	-3.11929
ENSG00000180530	0.348913	6.90569	3.3483	0.00315506	-1.85166
ENSG00000198763	0.334341	8.2769	3.42829	0.00262965	-1.74905
ENSG00000198712	-0.970523	6.8738	-3.18215	0.00580362	-2.3262
ENSG00000198899	-1.20384	5.35146	-2.33131	0.0335693	-3.78738
ENSG00000198938	-1.36002	7.18989	-4.76213	0.00021013	0.806935
ENSG00000212907	-2.15991	2.11032	-6.83038	1.37898e-06	3.81656
ENSG00000198786	0.387277	9.05675	3.6464	0.00165638	-1.33479
ENSG00000198695	0.516892	6.78361	3.79185	0.00126207	-0.956
ENSG00000198727	0.229852	10.2332	2.93141	0.00795373	-2.89135

## Sheet: MDD
ID	logFC	AveExpr	t	P.Value	B
ENSG00000204624	-0.410217	2.59413	-3.17087	0.00581726	-2.35258
ENSG00000011021	0.185211	6.22956	2.34518	0.0319718	-3.51921
ENSG00000131697	-0.334578	4.69422	-2.25588	0.0381412	-3.61003
ENSG00000175087	0.277741	5.01275	2.54675	0.0213177	-3.16666
ENSG00000130766	0.387784	2.81325	2.12011	0.0496655	-3.75524
ENSG00000121769	0.402703	6.34476	2.58386	0.0198808	-3.12794
ENSG00000116954	0.253981	3.60783	2.36918	0.0304804	-3.41406
ENSG00000142686	0.454596	6.75585	2.34908	0.0318903	-3.51649
ENSG00000121310	-0.394346	4.96	-2.35798	0.0312781	-3.46196
ENSG00000163866	0.189712	5.1575	2.18418	0.0438772	-3.74848
ENSG00000134744	-0.235616	7.45222	-2.14059	0.0477427	-3.84316
ENSG00000123080	0.450311	1.5265	2.93329	0.00959295	-2.81969
ENSG00000116704	-0.197208	4.82701	-2.50608	0.0231508	-3.22404
ENSG00000116675	0.284225	9.05472	2.17093	0.0450207	-3.77003
ENSG00000203965	0.158436	5.3098	2.16673	0.0453884	-3.78134
ENSG00000188786	-0.412269	4.66574	-4.26085	0.000574197	-0.311163
ENSG00000142949	-0.209094	7.2419	-2.32228	0.0334584	-3.55662
ENSG00000116133	0.482961	6.64189	4.19022	0.000666511	-0.305711
ENSG00000065243	-0.230926	6.65711	-2.26381	0.0375515	-3.65218
ENSG00000172339	0.207619	3.95915	2.27159	0.0369807	-3.56632
ENSG00000058799	0.332204	3.74366	2.88205	0.0106775	-2.62478
ENSG00000127124	-0.386904	5.93255	-2.80437	0.0125681	-2.74527
ENSG00000188641	-0.323894	6.55166	-3.54518	0.00262593	-1.44334
ENSG00000162377	0.388529	5.21498	2.88789	0.010548	-2.59811
ENSG00000069702	-0.397352	4.68631	-2.86008	0.0111782	-2.64357
ENSG00000134253	-0.257059	3.26888	-2.40886	0.0281575	-3.35883
ENSG00000183508	-0.802297	0.69727	-3.45805	0.0031614	-2.56023
ENSG00000079335	-0.54255	3.99344	-2.73598	0.0145396	-2.85813
ENSG00000143158	0.361044	5.95494	2.38795	0.029474	-3.4486
ENSG00000135862	-0.256607	5.72019	-2.44395	0.0262428	-3.34846
ENSG00000143156	-0.186631	5.12645	-2.14801	0.0470633	-3.7985
ENSG00000213064	-0.454931	6.05707	-2.70401	0.0155682	-2.92061
ENSG00000075945	0.315904	7.66015	3.10259	0.00672006	-2.22774
ENSG00000162694	0.336338	5.06658	2.73904	0.0143714	-2.84881
ENSG00000143476	0.961814	-0.966998	2.85052	0.0114031	-3.41311
ENSG00000162852	0.392184	6.43362	2.4891	0.0240967	-3.28689
ENSG00000121644	-0.236409	4.61452	-2.40494	0.028379	-3.379
ENSG00000116161	0.223503	7.36681	2.54506	0.0213909	-3.18831
ENSG00000173726	0.322645	8.36906	3.03397	0.00776552	-2.34711
ENSG00000143756	0.226871	6.00262	2.4087	0.0281664	-3.41338
ENSG00000092969	-0.357563	5.61494	-2.4215	0.027534	-3.38165
ENSG00000183831	-0.573366	1.64274	-2.42548	0.0272347	-3.45538
ENSG00000035687	0.297668	6.36812	2.49039	0.0238974	-3.28165
ENSG00000143786	0.339259	4.60229	2.50021	0.0234276	-3.23228
ENSG00000134375	0.401722	5.10254	2.48229	0.0244026	-3.27714
ENSG00000097046	0.408269	4.44397	2.48065	0.0244484	-3.2615
ENSG00000158828	0.385002	5.83623	3.31667	0.00427039	-1.85066
ENSG00000162630	0.531999	6.73526	2.42982	0.0271531	-3.38428
ENSG00000117308	0.373816	2.47641	2.94922	0.00927821	-2.64483
ENSG00000163399	0.474278	8.09121	3.08196	0.00707072	-2.26826
ENSG00000163463	-0.467312	0.828957	-2.86705	0.0110169	-3.11589
ENSG00000169231	-0.299487	3.6551	-2.26255	0.0376447	-3.56733
ENSG00000176444	-0.192224	4.81571	-2.27911	0.0364376	-3.58244
ENSG00000142657	0.205676	5.7323	2.37205	0.030307	-3.46863
ENSG00000130768	-0.728388	-0.627069	-2.42752	0.0271237	-3.77488
ENSG00000162636	0.440667	7.08361	2.36094	0.0311489	-3.4956
ENSG00000162639	0.305469	4.15675	2.16616	0.0454383	-3.73083
ENSG00000132718	0.151855	9.85239	2.23446	0.0397771	-3.65837
ENSG00000186377	0.384541	4.38839	2.12302	0.0495446	-3.80876
ENSG00000156869	-0.539571	0.318272	-2.14194	0.0476182	-3.88223
ENSG00000162734	-0.161196	9.45261	-2.23444	0.0397786	-3.66763
ENSG00000118733	0.779858	5.88778	2.42123	0.0276236	-3.39282
ENSG00000162520	-0.391058	2.84424	-2.60491	0.0189343	-3.10205
ENSG00000160097	0.350153	4.63033	2.16975	0.045227	-3.75114
ENSG00000116688	0.160041	7.37961	2.35053	0.0316337	-3.50902
ENSG00000173846	-0.556702	2.29825	-3.02224	0.00795949	-2.60433
ENSG00000204859	-0.245049	3.19558	-2.4173	0.0276855	-3.34813
ENSG00000171488	-0.194356	5.60558	-2.30259	0.0347876	-3.57456
ENSG00000142871	-1.22172	3.14245	-3.02441	0.00800625	-2.48743
ENSG00000177301	0.395956	8.12598	2.96911	0.00889914	-2.45995
ENSG00000243710	-0.816259	2.76635	-2.27509	0.0369021	-3.55965
ENSG00000179902	-0.753201	1.24626	-2.12818	0.0490389	-3.81122
ENSG00000142856	0.422584	3.85118	2.24999	0.0386944	-3.59632
ENSG00000131238	0.19029	6.46061	2.58724	0.0196302	-3.11941
ENSG00000117410	0.487439	4.22032	3.40521	0.00353775	-1.74287
ENSG00000172031	0.819026	3.25997	2.25414	0.0384489	-3.58059
ENSG00000189339	-0.401453	4.71193	-2.54272	0.0215166	-3.16146
ENSG00000143748	-0.183743	4.95913	-2.27761	0.0365452	-3.59091
ENSG00000181873	-0.27072	3.80068	-3.13262	0.00630725	-2.23746
ENSG00000162931	-0.303581	4.04765	-2.25681	0.0380718	-3.58459
ENSG00000177606	-0.409935	6.32041	-2.82363	0.0121253	-2.71715
ENSG00000156171	-0.264928	4.08183	-2.24418	0.0390267	-3.60639
ENSG00000143437	-0.175927	5.80522	-2.49377	0.0237349	-3.26861
ENSG00000116750	0.239815	6.64281	2.45835	0.0254931	-3.33556
ENSG00000097021	0.33594	5.47102	2.2749	0.0368491	-3.62044
ENSG00000181754	0.378222	6.21657	2.76574	0.0136272	-2.81612
ENSG00000116221	0.262954	4.24687	2.16573	0.0454763	-3.7362
ENSG00000134376	-0.362249	5.6404	-2.28763	0.0359605	-3.59639
ENSG00000066279	0.486359	2.0091	2.38096	0.0297726	-3.44814
ENSG00000198912	0.253762	3.65631	2.61155	0.0186791	-3.0492
ENSG00000122477	0.394918	3.77438	2.40106	0.0286005	-3.36903
ENSG00000137996	0.272484	5.73905	2.32417	0.0333332	-3.54638
ENSG00000121774	-0.143154	6.74713	-2.24878	0.0386766	-3.67639
ENSG00000025800	0.152934	6.89212	2.27601	0.0366609	-3.63229
ENSG00000159164	0.391055	8.06072	2.93561	0.00954638	-2.51821
ENSG00000116857	0.214123	5.30283	2.20663	0.042	-3.7201
ENSG00000160838	-1.4843	0.228456	-2.13624	0.0483373	-3.91311
ENSG00000162631	0.404096	5.21896	2.55562	0.0210314	-3.15945
ENSG00000168264	-0.299176	6.18892	-2.74801	0.0141071	-2.84418
ENSG00000162430	-0.259732	4.52623	-2.38538	0.029511	-3.40564
ENSG00000152763	-0.647591	5.43494	-2.4561	0.0257601	-3.31845
ENSG00000143479	-0.757869	3.94635	-4.734	0.000213611	0.232685
ENSG00000163125	-0.178605	6.71138	-2.93009	0.00965736	-2.53104
ENSG00000160789	-0.546181	4.44766	-2.18273	0.0441868	-3.71211
ENSG00000058453	-0.408657	4.39379	-2.18917	0.0435924	-3.69918
ENSG00000152061	0.181312	8.24566	2.46985	0.0249093	-3.30578
ENSG00000116922	0.273275	3.75567	2.16022	0.0459646	-3.72173
ENSG00000054116	0.217896	5.01936	2.20482	0.0421486	-3.71112
ENSG00000189171	0.471658	4.38498	2.54473	0.0215288	-3.15968
ENSG00000196182	-0.258883	4.45868	-2.72076	0.0149245	-2.87211
ENSG00000133067	-1.36288	-0.0448696	-2.24887	0.0388481	-3.8473
ENSG00000117036	-0.455837	5.49629	-3.4504	0.00321333	-1.62194
ENSG00000014914	-0.440419	3.1405	-2.32392	0.0333494	-3.48051
ENSG00000131779	0.361908	4.56923	2.4287	0.0270595	-3.34562
ENSG00000169641	0.214931	6.99261	2.15019	0.0468655	-3.83032
ENSG00000253368	0.479306	3.61504	2.61269	0.0186688	-3.04773
ENSG00000058804	0.218532	4.91489	2.18966	0.0434116	-3.73082
ENSG00000010165	0.184868	4.30565	2.27321	0.0368631	-3.57617
ENSG00000203666	-0.543904	4.29794	-2.8137	0.0123971	-2.72862
ENSG00000117713	-0.270821	7.04693	-2.68685	0.0160048	-2.95085
ENSG00000085433	0.348806	8.18811	2.71584	0.0150766	-2.8945
ENSG00000117523	-0.210156	9.14934	-2.53626	0.021777	-3.18829
ENSG00000182134	0.208443	5.10466	2.17079	0.0450327	-3.76873
ENSG00000142875	0.230567	9.54721	2.12027	0.0496497	-3.83832
ENSG00000122482	-0.196132	7.35403	-2.14811	0.0470545	-3.83177
ENSG00000117114	0.363158	7.24513	2.15066	0.0470127	-3.8288
ENSG00000158816	-1.1517	2.19062	-2.25727	0.0382141	-3.62121
ENSG00000198892	0.228662	4.76723	2.12974	0.0487526	-3.81481
ENSG00000134369	-0.261142	7.71761	-2.69215	0.0158312	-2.93906
ENSG00000155363	-0.379883	4.02948	-2.32051	0.0335755	-3.48885
ENSG00000197780	0.271304	5.71014	3.36077	0.00388839	-1.77356
ENSG00000117477	-0.261412	4.92509	-2.45891	0.0254647	-3.30303
ENSG00000099260	-0.65412	4.89282	-4.80166	0.000185752	0.571482
ENSG00000117153	0.23093	6.21099	2.44297	0.0262946	-3.35939
ENSG00000163159	0.172187	4.88014	2.28412	0.0360797	-3.58284
ENSG00000116459	0.22184	6.65855	2.73081	0.0146179	-2.8759
ENSG00000143153	0.25694	9.54937	2.9082	0.0101099	-2.56202
ENSG00000181218	0.306418	2.57115	2.16171	0.0458324	-3.70192
ENSG00000180488	0.197093	7.23562	2.85301	0.011344	-2.66406
ENSG00000031698	0.264248	7.54249	3.32768	0.00417174	-1.83081
ENSG00000134222	-0.400112	4.73829	-3.36086	0.00388765	-1.80145
ENSG00000163568	-1.02867	0.626902	-3.09598	0.00681442	-2.98386
ENSG00000117594	0.539352	1.30472	2.43584	0.0266742	-3.44187
ENSG00000117595	-0.927613	0.801223	-3.00618	0.00823286	-2.9861
ENSG00000177181	0.309031	5.86097	2.14668	0.0472877	-3.82979
ENSG00000134684	0.352163	6.74508	3.077	0.00709279	-2.2733
ENSG00000116560	-0.285525	8.92159	-2.48266	0.0242737	-3.27896
ENSG00000163349	-0.319246	7.94873	-2.45173	0.0258354	-3.33965
ENSG00000116729	-0.333255	6.24295	-2.25222	0.038535	-3.66801
ENSG00000196482	0.241709	4.95738	2.45147	0.0258491	-3.32044
ENSG00000266472	0.297491	5.99947	2.53331	0.0219077	-3.20745
ENSG00000162576	-0.259195	3.52244	-2.20496	0.0421373	-3.6465
ENSG00000265491	0.188941	6.83505	2.31309	0.0340728	-3.57282
ENSG00000122432	-0.654859	2.11402	-3.18031	0.00570219	-2.46921
ENSG00000143816	-0.568265	0.878539	-2.21816	0.0410657	-3.75845
ENSG00000120942	-0.242113	3.36871	-2.23867	0.039451	-3.5977
ENSG00000159377	0.271201	5.06254	2.25679	0.0380727	-3.63324
ENSG00000143442	-0.189289	7.31659	-2.20252	0.0423386	-3.74712
ENSG00000142599	-0.210862	8.21062	-2.87903	0.0107449	-2.61624
ENSG00000153187	-0.236574	9.47082	-2.28253	0.0361928	-3.59172
ENSG00000065526	-0.344604	8.31163	-2.44738	0.0260879	-3.34433
ENSG00000157933	-0.264145	6.36895	-2.31424	0.0339952	-3.56923
ENSG00000133226	-0.273153	7.1698	-2.22655	0.040398	-3.71043
ENSG00000158747	0.346147	5.08061	2.29013	0.0357433	-3.58305
ENSG00000060718	0.255583	6.1141	2.58276	0.0198105	-3.125
ENSG00000085832	0.201482	8.79918	2.83024	0.0118947	-2.69679
ENSG00000172554	-0.500782	1.69577	-2.13548	0.0482163	-3.77323
ENSG00000163029	-0.203887	6.64371	-2.70608	0.0153833	-2.91835
ENSG00000163032	0.494629	10.176	2.18842	0.043702	-3.72361
ENSG00000135625	-1.54417	0.536529	-2.33544	0.0327635	-3.68978
ENSG00000135631	0.341009	5.22371	3.33162	0.00413691	-1.83012
ENSG00000055813	0.56501	4.89119	2.3039	0.0348688	-3.55758
ENSG00000119801	0.236993	7.22804	2.69395	0.0157727	-2.93749
ENSG00000115423	-0.520954	6.577	-2.50931	0.0231441	-3.25176
ENSG00000153237	-0.296427	4.90067	-2.62501	0.0181717	-3.03236
ENSG00000115641	0.67975	3.14017	2.19236	0.04337	-3.66483
ENSG00000136718	0.210424	5.13745	2.15581	0.0463585	-3.7922
ENSG00000072135	-0.294023	5.00086	-3.30726	0.00435661	-1.88235
ENSG00000116120	0.258037	6.38846	2.46542	0.0251326	-3.32342
ENSG00000076003	0.333932	4.31412	2.33222	0.0328055	-3.48721
ENSG00000114948	0.43204	7.28537	2.94489	0.00941995	-2.5077
ENSG00000144320	0.25296	6.9543	3.18366	0.00566196	-2.08504
ENSG00000144331	0.661779	4.52395	2.53961	0.0217695	-3.17196
ENSG00000054219	0.819036	0.412928	3.87507	0.00130047	-2.15728
ENSG00000174453	0.407962	3.96678	2.2295	0.0402786	-3.6332
ENSG00000163449	0.411221	3.73578	3.06312	0.00730329	-2.33641
ENSG00000114933	-0.261804	6.81329	-3.19856	0.00548616	-2.05866
ENSG00000115233	0.254885	5.93815	2.49972	0.0234507	-3.26271
ENSG00000182329	-0.998115	4.52333	-4.61915	0.000279177	0.157268
ENSG00000196950	0.556226	8.10865	2.53836	0.0218248	-3.19561
ENSG00000003436	0.475625	2.05621	2.84395	0.0115602	-2.83921
ENSG00000115840	0.385388	6.85515	2.80873	0.012471	-2.74287
ENSG00000118242	0.383411	3.11164	2.83775	0.0117102	-2.72662
ENSG00000125633	-0.20599	6.59594	-2.8052	0.0125303	-2.74779
ENSG00000128654	0.495955	5.18743	3.75218	0.00168936	-1.09737
ENSG00000115368	0.133183	5.84412	2.18033	0.0442062	-3.77621
ENSG00000170745	0.511511	2.9381	2.5555	0.0209418	-3.15166
ENSG00000162804	-0.297488	4.43166	-2.19564	0.0429095	-3.68966
ENSG00000138378	0.709064	4.45565	3.94874	0.00113159	-0.820019
ENSG00000008869	0.185342	7.06954	2.51731	0.0226305	-3.23651
ENSG00000003509	0.181797	5.1423	2.28709	0.0358686	-3.58748
ENSG00000115828	0.562943	2.38146	2.57705	0.0200427	-3.15561
ENSG00000163171	0.332735	4.80824	2.19075	0.0433739	-3.72712
ENSG00000143952	-0.198275	5.80584	-3.02721	0.00787684	-2.35932
ENSG00000138078	0.291092	9.51184	2.83709	0.0117264	-2.68232
ENSG00000115687	-0.381652	3.97901	-2.61242	0.0186458	-3.04663
ENSG00000181378	-1.00639	1.40109	-2.15234	0.0468611	-3.77927
ENSG00000144567	0.238381	6.73914	2.84696	0.0114879	-2.67552
ENSG00000162961	0.193713	4.72608	2.22972	0.0401477	-3.66034
ENSG00000014641	0.472478	7.66499	3.21325	0.00535835	-2.0381
ENSG00000115234	0.236447	5.15893	2.44523	0.0261755	-3.33641
ENSG00000115226	0.33665	4.55011	2.74819	0.0141018	-2.82809
ENSG00000144061	-0.399527	5.25304	-2.33965	0.0324726	-3.50245
ENSG00000196151	0.208919	3.80118	2.42888	0.0270497	-3.32684
ENSG00000172292	0.384712	6.6291	2.43555	0.0268335	-3.37539
ENSG00000163001	0.162614	6.65298	2.73582	0.0144673	-2.86745
ENSG00000144182	-0.393788	2.25057	-3.5021	0.00287834	-1.98825
ENSG00000079785	0.209784	7.39196	2.32228	0.0334582	-3.55433
ENSG00000173692	0.166545	7.6305	2.3292	0.0330023	-3.54121
ENSG00000115750	-0.304023	4.56034	-3.0124	0.00812604	-2.39191
ENSG00000144589	-0.290191	3.37224	-2.53379	0.0218863	-3.17576
ENSG00000138430	0.329382	6.8424	2.4664	0.0251	-3.32194
ENSG00000144306	0.154593	5.85185	2.12209	0.0494766	-3.86684
ENSG00000163170	0.449222	3.31638	3.4674	0.00309911	-1.74781
ENSG00000135913	-0.181404	5.70107	-2.3195	0.0336432	-3.54988
ENSG00000154518	0.341542	5.45873	2.24325	0.039215	-3.6688
ENSG00000163328	0.278219	7.10226	2.56029	0.0207386	-3.16418
ENSG00000115271	0.212213	5.48107	2.18732	0.0436095	-3.75668
ENSG00000114982	0.163137	6.46143	2.49355	0.0237453	-3.27653
ENSG00000168763	-0.295316	4.49939	-2.33278	0.0327691	-3.48528
ENSG00000123983	0.159112	8.38776	2.37864	0.0299108	-3.45291
ENSG00000187605	-0.322709	5.85316	-3.90372	0.00122359	-0.81735
ENSG00000155760	-0.748294	2.77421	-3.42969	0.00335818	-1.98562
ENSG00000003137	0.648327	3.15275	3.93513	0.00114454	-1.0466
ENSG00000115170	-0.222918	4.48643	-2.25198	0.0384341	-3.61001
ENSG00000127824	0.616861	6.4847	3.06848	0.00729979	-2.29488
ENSG00000143970	-0.283051	7.17367	-2.29961	0.034993	-3.59367
ENSG00000136531	0.389428	9.60403	2.23868	0.0395847	-3.65629
ENSG00000144407	0.714559	1.93649	2.79665	0.0127698	-2.92155
ENSG00000077044	-0.272189	5.21547	-2.21267	0.0415084	-3.7015
ENSG00000183091	-0.411722	5.34508	-2.31065	0.0344081	-3.55131
ENSG00000138442	0.289985	5.85501	3.17242	0.00579818	-2.10503
ENSG00000003402	-0.382935	6.759	-2.7972	0.0127718	-2.76266
ENSG00000125629	0.245261	5.52025	2.32461	0.0333039	-3.54063
ENSG00000138018	0.292142	7.20504	2.22632	0.0404163	-3.70873
ENSG00000171303	0.485404	3.41139	2.17652	0.0447096	-3.69098
ENSG00000115520	0.224498	5.24247	2.14855	0.047014	-3.8079
ENSG00000119772	-0.267984	6.42476	-3.09116	0.0068841	-2.24821
ENSG00000115073	0.44058	5.27414	3.75923	0.00166418	-1.08176
ENSG00000115839	0.138249	7.8228	2.14284	0.0475357	-3.83397
ENSG00000116117	-0.643596	5.2512	-2.25076	0.0387047	-3.63632
ENSG00000127838	0.321194	5.0401	2.95262	0.00921233	-2.48663
ENSG00000068878	-0.41721	6.79609	-2.61812	0.0185513	-3.07074
ENSG00000068912	0.151235	6.70158	2.52979	0.0220648	-3.21658
ENSG00000119812	0.227586	6.04694	2.93652	0.00952824	-2.51857
ENSG00000124357	-0.211028	5.38197	-2.29304	0.0354498	-3.58204
ENSG00000136699	-0.174585	4.53024	-2.37558	0.0300941	-3.42195
ENSG00000163006	-0.364013	3.89451	-2.74993	0.0140512	-2.83318
ENSG00000115461	-0.503052	7.19555	-2.75457	0.01403	-2.83812
ENSG00000134318	0.242336	8.64222	2.44976	0.0259381	-3.33387
ENSG00000153208	-0.435875	5.72737	-2.36884	0.0306638	-3.47015
ENSG00000116005	0.327867	6.95753	3.64344	0.00212983	-1.26857
ENSG00000144285	0.435677	7.59975	3.43579	0.00331484	-1.63994
ENSG00000243147	0.219189	4.31952	2.21837	0.0410489	-3.66
ENSG00000163803	-0.295275	3.43387	-2.4899	0.0239212	-3.23921
ENSG00000143933	0.204597	10.2955	2.16564	0.0454848	-3.75585
ENSG00000163798	0.182075	6.5786	2.13567	0.0481983	-3.85436
ENSG00000115310	0.254997	10.2129	3.07467	0.00712773	-2.28183
ENSG00000119185	0.234372	5.6954	3.0338	0.00776842	-2.34783
ENSG00000134330	0.207611	4.76698	2.29368	0.0354053	-3.56329
ENSG00000157985	-0.220589	8.2431	-2.43353	0.0267981	-3.36668
ENSG00000135900	0.248562	4.32817	2.39973	0.0286768	-3.38315
ENSG00000151690	0.254236	7.56992	2.31955	0.0336396	-3.5568
ENSG00000115419	0.414271	8.79608	2.33529	0.0327731	-3.51798
ENSG00000138069	0.160997	7.13492	2.25705	0.0380535	-3.66114
ENSG00000130508	-0.403411	4.03936	-2.60932	0.0187647	-3.05058
ENSG00000128656	0.592621	9.4941	2.44356	0.0264161	-3.33433
ENSG00000155729	0.244476	3.91561	2.45555	0.0256373	-3.28775
ENSG00000134121	0.304573	9.28592	2.15233	0.0466717	-3.79388
ENSG00000144635	0.31601	6.25762	2.98742	0.00856371	-2.43033
ENSG00000173705	0.450356	4.45363	2.73161	0.0146565	-2.85744
ENSG00000182247	0.402671	4.83038	2.46872	0.025066	-3.29193
ENSG00000196277	0.351183	5.73255	2.29871	0.0351774	-3.58853
ENSG00000175928	-0.259883	5.90655	-2.6347	0.0178144	-3.03401
ENSG00000088543	0.354445	3.96301	4.31184	0.000515711	-0.312417
ENSG00000163939	-0.207902	7.02717	-2.23661	0.0396098	-3.69513
ENSG00000172986	-0.43363	4.33176	-2.73141	0.0145996	-2.8555
ENSG00000153558	0.277355	5.96072	2.27706	0.036585	-3.626
ENSG00000168309	-0.440488	9.43095	-2.54945	0.0213197	-3.16712
ENSG00000044524	1.05419	4.27897	3.29511	0.00452914	-1.92572
ENSG00000154174	0.252034	7.54329	2.17989	0.0442444	-3.77905
ENSG00000004838	-1.20966	1.06141	-2.32419	0.0335006	-3.63907
ENSG00000091972	0.299477	6.25943	2.24584	0.0389203	-3.67931
ENSG00000206530	-0.575626	5.85037	-2.49166	0.0239826	-3.2717
ENSG00000144746	0.266729	6.49172	3.47118	0.00307426	-1.57468
ENSG00000240891	0.455745	5.45233	2.33101	0.0330519	-3.53123
ENSG00000163590	0.341938	7.77762	2.9121	0.0100277	-2.55979
ENSG00000031081	-0.410763	5.89501	-2.29296	0.0356282	-3.59618
ENSG00000163655	0.14796	7.21434	2.30828	0.0343986	-3.57849
ENSG00000121871	0.359637	5.43833	2.13477	0.0484743	-3.83806
ENSG00000136603	-0.209833	7.14648	-3.61214	0.00227675	-1.32426
ENSG00000120742	-0.226038	6.39818	-2.42022	0.0275236	-3.39714
ENSG00000163659	-0.633951	5.3186	-3.20305	0.00550038	-2.06443
ENSG00000176597	-0.388453	4.53386	-2.86726	0.011012	-2.63323
ENSG00000186001	-0.236247	6.50201	-2.64896	0.0173012	-3.01526
ENSG00000113916	-0.492485	5.6174	-2.32267	0.0336009	-3.54158
ENSG00000163577	0.383072	4.48359	2.85774	0.0112328	-2.64709
ENSG00000163714	-0.179178	7.82689	-2.16944	0.0451506	-3.79379
ENSG00000172020	0.423729	8.51036	2.94054	0.0094702	-2.50991
ENSG00000144959	0.49592	6.45789	2.65558	0.0171929	-3.0076
ENSG00000151092	0.156097	5.4087	2.21523	0.0413014	-3.70983
ENSG00000160796	-0.336322	3.30839	-2.83454	0.0117889	-2.74383
ENSG00000197885	0.289466	6.15788	2.51	0.0229679	-3.24791
ENSG00000164062	0.188328	5.09373	2.30549	0.034589	-3.55744
ENSG00000156976	0.316634	9.69936	2.2269	0.0403701	-3.67193
ENSG00000157150	-0.345227	2.48321	-2.16183	0.0458217	-3.70631
ENSG00000163536	0.724763	7.74832	2.46832	0.0251358	-3.31372
ENSG00000183833	-0.665895	3.70002	-2.68382	0.0162266	-2.94992
ENSG00000164086	0.326409	4.75789	2.18821	0.0435556	-3.72804
ENSG00000023330	0.383123	4.93761	3.69073	0.00192569	-1.21537
ENSG00000247596	0.422368	2.68281	2.44168	0.0263627	-3.32403
ENSG00000163885	-1.08224	2.01177	-2.59828	0.0193255	-3.22957
ENSG00000175161	0.368487	8.76553	4.13556	0.000748177	-0.433563
ENSG00000114346	0.309283	4.03606	2.37359	0.030214	-3.41624
ENSG00000198836	0.218137	8.36511	2.40811	0.0281999	-3.40523
ENSG00000136521	0.243416	6.13648	2.38984	0.0292494	-3.44603
ENSG00000211456	0.198434	6.30793	2.92114	0.00983999	-2.54618
ENSG00000169379	-0.337354	4.69755	-3.11243	0.00658196	-2.2221
ENSG00000010256	0.325665	5.90189	3.03156	0.00780511	-2.35227
ENSG00000213672	0.233635	4.71585	2.15841	0.046126	-3.76969
ENSG00000163964	0.258283	5.49877	3.14933	0.00608829	-2.14611
ENSG00000179097	0.758316	3.22414	2.99693	0.0084802	-2.47106
ENSG00000114841	-0.432786	5.83996	-2.77566	0.0134051	-2.79649
ENSG00000188582	0.491459	5.08883	2.37831	0.0300918	-3.44526
ENSG00000144791	-0.424504	2.44596	-2.35622	0.0312774	-3.46319
ENSG00000136068	-0.383776	6.87773	-2.32258	0.0336073	-3.55875
ENSG00000225526	0.338276	2.00898	2.15524	0.0464097	-3.72372
ENSG00000144857	-0.578237	3.61175	-3.10488	0.00668774	-2.31014
ENSG00000181789	0.306734	6.52403	3.06913	0.00721142	-2.28716
ENSG00000088727	-0.530507	3.67097	-2.52316	0.0224614	-3.18831
ENSG00000114686	0.242618	5.78415	2.4061	0.0283135	-3.41441
ENSG00000144821	-0.419035	4.48347	-2.20166	0.0425796	-3.68587
ENSG00000113811	-0.313092	5.03387	-2.67512	0.0163959	-2.95278
ENSG00000164054	0.213196	4.92658	2.53321	0.0219123	-3.18627
ENSG00000178252	-0.177393	5.68062	-2.31187	0.0341554	-3.56119
ENSG00000248487	0.360258	2.45828	2.50022	0.0234272	-3.261
ENSG00000163882	0.252415	3.69725	2.29489	0.0353212	-3.52459
ENSG00000181555	-0.228707	8.21935	-2.55815	0.0208291	-3.1612
ENSG00000168137	-0.22388	8.06503	-2.55382	0.0210135	-3.16978
ENSG00000161203	0.240167	8.25828	2.53924	0.0216454	-3.19083
ENSG00000163788	0.232825	6.42962	2.90918	0.0100892	-2.56727
ENSG00000004534	-0.245777	7.5336	-2.91242	0.0100211	-2.56064
ENSG00000125037	0.189388	5.29212	2.57433	0.0201538	-3.12775
ENSG00000196542	0.793257	3.31441	3.12592	0.00647026	-2.27193
ENSG00000163913	-0.21112	6.28037	-2.14673	0.0471796	-3.83361
ENSG00000168038	-0.487547	5.08612	-3.00714	0.00827134	-2.39846
ENSG00000144645	0.384157	4.67704	2.26193	0.0378182	-3.61279
ENSG00000152642	0.308979	6.07179	2.37962	0.0298525	-3.46182
ENSG00000163617	-0.461152	5.61878	-2.72801	0.0148189	-2.87548
ENSG00000163728	-0.202657	7.21093	-2.66329	0.0167993	-2.99043
ENSG00000205981	0.208161	5.21079	2.43353	0.0267982	-3.3561
ENSG00000158163	-0.788234	2.74835	-2.1692	0.0453593	-3.69596
ENSG00000173175	-0.274795	6.74883	-2.15803	0.0461596	-3.8194
ENSG00000113966	0.361488	5.26422	2.66708	0.016669	-2.97272
ENSG00000144712	0.377254	4.37527	3.32502	0.00419535	-1.87095
ENSG00000174579	-0.14009	6.00296	-2.21379	0.0414181	-3.72515
ENSG00000214021	-0.308874	4.54744	-2.36365	0.0308185	-3.43887
ENSG00000114573	0.386743	8.8512	2.60127	0.019116	-3.0827
ENSG00000114115	-0.477517	3.94027	-2.66473	0.0167705	-2.96626
ENSG00000144647	0.268598	4.66385	2.12869	0.0488516	-3.81146
ENSG00000163807	0.215497	5.576	2.47951	0.0244283	-3.28981
ENSG00000109519	0.244489	4.98297	3.16338	0.00591013	-2.12554
ENSG00000109667	-0.559196	1.0584	-3.05427	0.00744077	-2.87315
ENSG00000163132	-0.798068	0.744138	-2.34913	0.0317219	-3.64799
ENSG00000155275	-0.167392	4.67287	-2.16942	0.0451527	-3.74285
ENSG00000198301	0.185492	6.54998	2.63063	0.0179636	-3.04679
ENSG00000164038	0.37587	5.97544	3.00335	0.00828191	-2.40185
ENSG00000169116	0.623451	6.82983	2.9538	0.00927981	-2.49487
ENSG00000145354	0.282127	4.71103	2.51829	0.0225853	-3.20565
ENSG00000164032	0.347759	5.27492	2.30524	0.0347118	-3.56638
ENSG00000169288	0.170844	4.36517	2.15047	0.04684	-3.76338
ENSG00000109270	0.253228	6.13351	2.33584	0.0325705	-3.5337
ENSG00000249242	0.332476	5.43918	2.78827	0.0129785	-2.77004
ENSG00000164066	-0.365905	7.1157	-3.96526	0.00107358	-0.699145
ENSG00000138769	0.279416	5.62895	2.74603	0.0141651	-2.84419
ENSG00000038295	0.393658	4.11539	2.37503	0.0301457	-3.41618
ENSG00000164122	0.677581	0.424459	2.38661	0.0294385	-3.60029
ENSG00000150630	-0.516982	0.928539	-2.18544	0.0437698	-3.77866
ENSG00000151729	0.311098	7.03169	2.13774	0.0481264	-3.85001
ENSG00000164031	0.203799	7.72985	2.1327	0.0484757	-3.8504
ENSG00000171509	0.712779	5.29463	2.1627	0.0459335	-3.79069
ENSG00000151718	-0.254988	6.2838	-2.73126	0.0146041	-2.87343
ENSG00000185149	0.680266	1.86293	2.6066	0.0189275	-3.1589
ENSG00000128045	1.19658	-0.771869	2.79946	0.0126926	-3.39738
ENSG00000118579	-0.183208	6.43824	-2.47229	0.0247868	-3.31158
ENSG00000047315	0.247066	7.25815	2.40165	0.0285668	-3.42618
ENSG00000196159	-0.34709	5.97434	-2.66989	0.0165732	-2.97408
ENSG00000145332	0.19273	6.37412	2.5288	0.0221091	-3.21768
ENSG00000168769	-0.358158	6.70716	-3.21858	0.00525831	-2.02322
ENSG00000109180	0.169473	7.17906	2.20376	0.0422358	-3.74518
ENSG00000138757	0.284976	8.61651	2.46465	0.0251716	-3.30969
ENSG00000138660	0.250158	6.02053	2.15575	0.046364	-3.81789
ENSG00000145242	0.81083	6.66799	3.54284	0.0026808	-1.45953
ENSG00000138759	0.491242	6.17715	2.27458	0.0369392	-3.63318
ENSG00000138821	0.318653	3.50121	2.30431	0.0346696	-3.50797
ENSG00000128059	0.267578	4.66451	2.34792	0.0317979	-3.47504
ENSG00000145390	-0.405087	6.6864	-3.16727	0.00586168	-2.114
ENSG00000138642	0.264537	5.05257	2.2651	0.0374562	-3.61914
ENSG00000145293	0.227741	6.28106	2.45152	0.0258461	-3.3455
ENSG00000145220	-0.394699	3.41639	-2.31004	0.0342788	-3.49754
ENSG00000178177	-0.22115	5.71734	-2.57605	0.0200832	-3.1299
ENSG00000168993	0.442076	4.55751	2.7135	0.0152136	-2.88774
ENSG00000198589	-0.178368	7.45148	-2.12957	0.048769	-3.85982
ENSG00000138792	-1.57629	2.24605	-3.5553	0.00261098	-2.01824
ENSG00000164112	0.928566	4.5632	2.27124	0.0371816	-3.5965
ENSG00000205129	-0.88156	2.25656	-3.01552	0.00813761	-2.65344
ENSG00000169851	0.37556	7.78597	2.12001	0.0498682	-3.87003
ENSG00000154277	0.393946	8.80782	3.19753	0.00549804	-2.0634
ENSG00000071127	-0.24446	6.29627	-2.88679	0.0105723	-2.60544
ENSG00000109436	0.294727	6.95275	2.23501	0.0397398	-3.69699
ENSG00000109738	0.556051	6.26223	2.77151	0.0135484	-2.8094
ENSG00000138668	-0.228758	7.31168	-2.46847	0.0249784	-3.31704
ENSG00000154553	-0.533208	4.42572	-2.41307	0.0280776	-3.36017
ENSG00000072832	0.253516	6.5973	2.19052	0.0433389	-3.76831
ENSG00000145365	0.51908	1.84461	2.74724	0.0141298	-3.00851
ENSG00000145526	0.524556	6.56997	2.31101	0.0343835	-3.57764
ENSG00000152932	0.4066	9.03434	2.27515	0.0368978	-3.60954
ENSG00000113597	0.230693	5.74005	2.15278	0.0466312	-3.81689
ENSG00000134480	-0.258872	6.62758	-2.38379	0.0296052	-3.45781
ENSG00000173221	0.288276	4.44923	2.31913	0.0336675	-3.51213
ENSG00000164190	-0.316204	7.75791	-2.77771	0.0132658	-2.7926
ENSG00000197860	0.500469	7.55832	2.70773	0.0154498	-2.91601
ENSG00000164211	0.350429	5.76781	2.86146	0.0111461	-2.64723
ENSG00000198961	0.267183	10.1089	2.90507	0.0101762	-2.56738
ENSG00000134982	-0.20025	10.5324	-2.34452	0.0320137	-3.47898
ENSG00000113595	0.297692	6.93207	2.62983	0.0179931	-3.0475
ENSG00000164209	0.286016	7.11866	2.46637	0.0250847	-3.32052
ENSG00000134986	0.513739	3.72485	2.55274	0.0211652	-3.14063
ENSG00000177453	0.235257	4.82226	2.20939	0.0417748	-3.69754
ENSG00000113361	0.442286	5.56923	2.92229	0.00987863	-2.54475
ENSG00000112972	0.328528	7.85056	2.21308	0.0415898	-3.72392
ENSG00000131711	0.421943	12.1648	2.7088	0.0152973	-2.89268
ENSG00000164512	-0.37598	2.97967	-2.16677	0.0453854	-3.69389
ENSG00000173926	-0.607613	2.47775	-2.18032	0.0443593	-3.68802
ENSG00000175449	0.410296	1.3793	3.22984	0.0051344	-2.52258
ENSG00000091009	0.154897	4.98134	2.38132	0.0297515	-3.43283
ENSG00000113657	-0.469533	7.84999	-2.38623	0.0296218	-3.45076
ENSG00000155858	0.489677	5.36846	2.34583	0.0320965	-3.50549
ENSG00000072364	-0.172336	8.51119	-2.16295	0.0457219	-3.79445
ENSG00000113638	0.246846	6.47672	2.42807	0.0270934	-3.38534
ENSG00000131507	0.263797	8.72212	2.50363	0.0232662	-3.24478
ENSG00000113552	0.249236	4.68709	2.31803	0.0337411	-3.52264
ENSG00000164576	0.299407	5.33169	4.14741	0.000729642	-0.407831
ENSG00000174705	-0.395766	4.68204	-3.00979	0.00817071	-2.39422
ENSG00000022355	0.606907	8.04265	2.28785	0.0359886	-3.60228
ENSG00000164284	0.319237	5.19548	2.79798	0.0127195	-2.75087
ENSG00000123213	0.255171	6.2428	2.8516	0.0113775	-2.66694
ENSG00000113300	-0.168245	5.71277	-2.42868	0.0270605	-3.37411
ENSG00000013561	0.217015	6.64518	2.42018	0.0275261	-3.39849
ENSG00000170464	0.218304	6.38203	2.23152	0.0400068	-3.70285
ENSG00000215218	0.516016	6.12045	2.41933	0.0277291	-3.39964
ENSG00000145545	0.362142	5.66876	3.34517	0.00401946	-1.80149
ENSG00000243232	0.454387	4.65669	2.34922	0.0318817	-3.4774
ENSG00000043462	0.391883	2.72169	2.836	0.0117531	-2.77408
ENSG00000170445	0.170599	6.77988	2.74668	0.0141462	-2.8487
ENSG00000129625	0.293471	8.4315	3.02378	0.00793385	-2.36474
ENSG00000113327	0.433455	7.66141	2.40948	0.0282797	-3.4119
ENSG00000145864	0.529914	8.81531	2.36097	0.0311471	-3.47598
ENSG00000187678	-0.471161	4.78992	-3.03753	0.00771891	-2.34787
ENSG00000113645	-0.209864	6.46064	-2.56579	0.0205078	-3.15563
ENSG00000248383	0.347929	3.27922	2.7146	0.0151153	-2.90538
ENSG00000164615	0.283639	5.79563	2.32528	0.03326	-3.54586
ENSG00000113621	0.217196	6.21038	2.98452	0.00861607	-2.43524
ENSG00000164187	0.323304	7.57411	2.39001	0.0292571	-3.44274
ENSG00000131437	0.197976	8.79244	2.22215	0.0407467	-3.69573
ENSG00000197208	-0.404408	3.00797	-2.877	0.0107905	-2.70789
ENSG00000082213	0.324539	5.64933	3.04007	0.00766652	-2.33686
ENSG00000079215	-0.422455	10.2288	-2.18006	0.0444166	-3.74074
ENSG00000120733	-0.184057	7.37225	-2.33909	0.032361	-3.52855
ENSG00000197603	-0.145114	8.28991	-2.22001	0.0409179	-3.70887
ENSG00000072803	0.159087	7.30281	2.65751	0.0169999	-2.99929
ENSG00000197822	-0.60422	2.5626	-2.1208	0.0497807	-3.7598
ENSG00000173545	0.212378	5.05135	2.63405	0.0178381	-3.02358
ENSG00000168916	-0.308307	6.72521	-2.20401	0.04231	-3.74794
ENSG00000039139	-0.726667	5.27436	-2.33006	0.0331141	-3.51215
ENSG00000164326	1.29096	2.42614	3.42796	0.00341953	-1.94535
ENSG00000253537	-0.339867	3.31681	-2.16371	0.0456547	-3.70002
ENSG00000253873	-0.348186	3.43088	-2.421	0.0274808	-3.3395
ENSG00000164620	0.457417	2.45885	3.05236	0.00747073	-2.49979
ENSG00000113504	-0.389387	2.99216	-2.52966	0.0220705	-3.20006
ENSG00000185305	0.540221	5.11415	2.58364	0.0199095	-3.11306
ENSG00000132563	0.200328	5.8696	2.37162	0.0303329	-3.47168
ENSG00000253305	-0.507311	3.64307	-3.03037	0.00782461	-2.4205
ENSG00000181104	-0.559657	2.16211	-3.47884	0.00302456	-2.08342
ENSG00000164463	0.111774	6.94121	2.14522	0.0473177	-3.83872
ENSG00000134987	0.202055	5.81968	2.58172	0.0198524	-3.12393
ENSG00000085365	0.254776	7.45595	2.82464	0.0120342	-2.71226
ENSG00000038274	0.296587	6.28519	3.65237	0.00208971	-1.25291
ENSG00000237190	0.448177	4.52714	3.05321	0.0074574	-2.31965
ENSG00000145860	0.281189	6.48735	2.62436	0.018196	-3.05702
ENSG00000164332	0.268153	5.81647	2.94735	0.00931455	-2.4989
ENSG00000175416	0.300845	6.02415	2.87532	0.0108284	-2.62488
ENSG00000145911	0.410641	3.28222	2.5776	0.02002	-3.10862
ENSG00000049883	0.178138	5.14828	2.16507	0.0455347	-3.77786
ENSG00000178175	0.545127	1.31086	3.32445	0.00420043	-2.43808
ENSG00000113456	0.288587	5.05158	3.29096	0.00451002	-1.904
ENSG00000145703	-0.977098	3.16644	-2.63911	0.0177814	-3.04512
ENSG00000164291	0.29801	3.37745	2.42638	0.0271854	-3.32952
ENSG00000181751	0.284681	5.23538	2.17109	0.0450065	-3.77378
ENSG00000197043	0.490396	7.35821	4.29109	0.000538743	-0.135468
ENSG00000113575	0.261009	5.85863	2.56566	0.0205129	-3.15189
ENSG00000150753	0.226091	6.58572	2.41928	0.0275753	-3.39977
ENSG00000145495	0.144289	8.77264	2.2845	0.0360523	-3.59827
ENSG00000213585	0.30427	7.57065	2.69006	0.0158993	-2.94219
ENSG00000153922	-0.264107	6.7791	-2.63791	0.0176977	-3.03457
ENSG00000112977	-0.2377	3.97419	-2.12914	0.0488092	-3.76974
ENSG00000124802	0.431483	2.7335	2.95831	0.00910309	-2.59103
ENSG00000137364	0.270594	5.10838	2.50423	0.0232379	-3.23884
ENSG00000007944	-0.244853	4.59132	-2.23937	0.0393962	-3.63561
ENSG00000111859	-0.463472	4.64087	-2.59096	0.0195904	-3.08632
ENSG00000112759	0.398878	3.70731	2.4495	0.0259517	-3.29534
ENSG00000146143	-0.188889	2.50362	-2.1494	0.046937	-3.72033
ENSG00000135315	-0.333753	5.66924	-2.49044	0.0238949	-3.2702
ENSG00000118402	0.50186	5.5343	3.49298	0.00295599	-1.54736
ENSG00000009413	-0.253846	7.99438	-2.42902	0.0270418	-3.37695
ENSG00000118690	-0.3069	5.86898	-2.46064	0.0253759	-3.32319
ENSG00000111879	-0.341049	7.12856	-4.22884	0.000614315	-0.236775
ENSG00000164434	-0.311024	6.88934	-2.13493	0.0483884	-3.85575
ENSG00000111911	0.139228	6.48744	2.36008	0.0310379	-3.49679
ENSG00000215712	0.281708	5.32376	2.36569	0.030693	-3.46989
ENSG00000198719	-0.652902	2.77559	-2.31964	0.033803	-3.49796
ENSG00000146278	-0.19573	6.52155	-2.43422	0.026761	-3.37478
ENSG00000198478	0.474501	6.8464	3.66621	0.00202898	-1.22823
ENSG00000119899	0.21456	4.4151	2.43563	0.0266851	-3.32911
ENSG00000164694	-1.2849	0.253956	-2.7586	0.0138976	-3.37353
ENSG00000131023	-0.21631	6.51915	-3.71875	0.00181408	-1.1344
ENSG00000146242	1.49085	1.50172	4.48919	0.000365428	-0.81776
ENSG00000189241	0.294018	8.44208	2.13225	0.0485174	-3.84015
ENSG00000112293	0.243044	5.07061	2.76858	0.0135191	-2.79902
ENSG00000112367	0.225839	6.33669	2.35383	0.0314267	-3.50576
ENSG00000112640	0.273465	5.45196	2.35263	0.0315015	-3.49426
ENSG00000137171	0.166226	4.61012	2.20052	0.0425034	-3.69926
ENSG00000048544	0.20332	5.33834	2.14015	0.047783	-3.82463
ENSG00000213079	-0.195202	7.21779	-2.73036	0.0146315	-2.87595
ENSG00000146151	0.348582	5.81373	2.79604	0.0127708	-2.76037
ENSG00000214113	0.30821	4.00154	2.61804	0.0184328	-3.03613
ENSG00000198563	-0.250863	5.13923	-2.6729	0.0164708	-2.9577
ENSG00000213722	-0.378163	3.83155	-2.82384	0.0120543	-2.72167
ENSG00000112357	0.331302	2.81873	2.61005	0.0187365	-3.08499
ENSG00000180992	0.374653	2.31449	2.70034	0.0155662	-3.00071
ENSG00000137216	0.262503	5.38054	2.7545	0.013919	-2.82662
ENSG00000204392	0.343559	1.95529	2.62462	0.0181861	-3.14257
ENSG00000204386	0.288272	4.08766	2.90064	0.0102709	-2.58304
ENSG00000112146	0.196016	6.59607	2.65274	0.0171672	-3.00924
ENSG00000112139	-0.405493	4.58218	-2.92782	0.00970334	-2.53358
ENSG00000135541	-0.313901	8.71518	-2.32236	0.0334529	-3.54157
ENSG00000213676	-0.30154	4.83349	-3.08874	0.00691939	-2.25841
ENSG00000196230	0.277203	7.48337	2.18503	0.0438041	-3.77182
ENSG00000137312	0.258458	6.60952	2.24351	0.0390779	-3.68459
ENSG00000137267	0.465403	6.48312	2.13993	0.0479952	-3.84826
ENSG00000112237	0.151079	5.58974	2.12271	0.0494171	-3.85893
ENSG00000204356	-0.251121	4.46695	-2.44693	0.0260862	-3.30883
ENSG00000203734	-0.762445	2.65616	-2.5127	0.0229864	-3.25459
ENSG00000155906	0.175647	5.03394	2.70697	0.015355	-2.90157
ENSG00000146476	0.244211	4.795	2.7526	0.0139739	-2.82267
ENSG00000118518	0.160165	6.59727	2.65631	0.0170421	-3.00316
ENSG00000112514	0.221757	4.67097	2.46231	0.0252908	-3.29421
ENSG00000118515	-0.566347	5.68994	-2.44171	0.0265146	-3.3509
ENSG00000146433	0.255852	6.72468	2.50783	0.0230689	-3.25309
ENSG00000122335	0.290458	5.07033	2.78439	0.0130833	-2.77254
ENSG00000146376	-0.599752	4.45753	-2.20578	0.0422533	-3.67342
ENSG00000172348	0.413334	7.52631	2.28535	0.0361658	-3.61382
ENSG00000124782	-0.462293	4.12174	-2.14793	0.0472616	-3.74404
ENSG00000185345	0.253046	5.39427	2.16399	0.0456298	-3.78969
ENSG00000124702	0.406848	6.59279	2.29672	0.0353656	-3.60094
ENSG00000112530	-0.449937	3.26178	-4.00199	0.000993013	-1.01302
ENSG00000135540	-0.510077	5.56843	-2.35325	0.0316279	-3.49027
ENSG00000272514	-0.727521	0.161184	-2.68423	0.0160914	-3.41764
ENSG00000065609	0.373601	8.29786	2.24195	0.0393649	-3.6734
ENSG00000112182	-0.368401	4.49491	-3.97248	0.00105724	-0.802056
ENSG00000120278	-0.390977	5.5177	-3.02366	0.00793585	-2.36478
ENSG00000111897	0.205348	9.97951	2.89745	0.0103396	-2.58009
ENSG00000146285	-0.756997	0.534638	-2.95152	0.00923345	-3.12586
ENSG00000120265	0.48785	7.11483	2.73009	0.0147556	-2.88009
ENSG00000013392	0.304645	4.66097	2.24793	0.0387408	-3.63068
ENSG00000135587	-0.633522	1.37194	-3.29445	0.00447677	-2.53643
ENSG00000112365	0.222776	5.15547	2.31185	0.0341563	-3.54937
ENSG00000096092	0.389694	5.05643	3.03637	0.00772644	-2.34311
ENSG00000056972	-0.345645	5.20492	-2.20285	0.0424265	-3.71395
ENSG00000185127	0.28125	5.28518	2.58234	0.0198275	-3.11414
ENSG00000186577	0.419731	3.56529	3.18891	0.00559932	-2.14991
ENSG00000112062	0.19103	5.98411	2.32662	0.0331718	-3.54641
ENSG00000106537	0.600311	6.18485	2.58241	0.0199592	-3.12968
ENSG00000106392	-0.294036	5.78755	-2.31814	0.0337341	-3.55289
ENSG00000164649	-0.549576	3.15567	-2.24807	0.0388823	-3.58615
ENSG00000106524	0.291578	5.93108	2.14896	0.0470038	-3.82792
ENSG00000146731	0.179666	6.8601	2.4403	0.0264361	-3.36507
ENSG00000146733	-0.256006	3.88725	-2.5795	0.0199424	-3.09735
ENSG00000005020	0.27879	5.96706	2.23336	0.0398631	-3.69569
ENSG00000106605	0.209149	4.4546	2.39535	0.0289289	-3.39371
ENSG00000154978	0.215005	5.54053	3.45595	0.00317557	-1.60777
ENSG00000122507	-0.267155	5.87927	-2.45412	0.0257112	-3.33412
ENSG00000004766	0.255548	6.49657	2.19182	0.0432298	-3.76595
ENSG00000128590	0.244417	5.2976	2.82829	0.0119432	-2.7002
ENSG00000184408	0.280373	6.22115	2.27546	0.0367005	-3.63114
ENSG00000004059	0.418307	4.30612	2.55307	0.0210873	-3.14322
ENSG00000196937	0.353744	7.09981	2.34636	0.0320155	-3.51877
ENSG00000006453	-0.396285	0.911924	-2.24521	0.0389484	-3.72669
ENSG00000126870	-0.257071	6.85016	-2.32355	0.033374	-3.5559
ENSG00000166997	-0.22869	3.31372	-2.29771	0.0351245	-3.51495
ENSG00000006652	-0.470768	4.04504	-2.32414	0.0334791	-3.48817
ENSG00000122557	-0.129695	5.40363	-2.12529	0.0491724	-3.84587
ENSG00000090263	0.189597	4.88632	2.2646	0.0374928	-3.61316
ENSG00000160917	0.173945	4.06986	2.13129	0.0486075	-3.77661
ENSG00000082014	-0.177031	5.41197	-2.14789	0.0470742	-3.81006
ENSG00000105793	0.261902	5.6555	3.3936	0.00362621	-1.71623
ENSG00000058091	0.446744	7.67795	2.76561	0.0137056	-2.81667
ENSG00000105976	0.96057	3.85599	2.57591	0.0202248	-3.10627
ENSG00000106683	0.3166	5.95157	2.40546	0.0283499	-3.41782
ENSG00000105819	0.172933	6.30158	2.12901	0.0488214	-3.86304
ENSG00000049541	0.269382	3.1114	2.1662	0.0454351	-3.69695
ENSG00000122641	-0.783334	2.4096	-2.87717	0.0108528	-2.79577
ENSG00000106571	-0.414319	4.64657	-2.58253	0.0198425	-3.09588
ENSG00000170419	0.434123	7.19336	2.45013	0.0260708	-3.34942
ENSG00000105939	-0.513094	5.14169	-2.40609	0.028472	-3.39237
ENSG00000105948	-0.462282	3.66735	-2.22132	0.0409348	-3.62727
ENSG00000157741	-0.170397	7.55385	-2.47127	0.0248379	-3.3108
ENSG00000164815	0.234719	5.05513	2.57397	0.0201689	-3.12311
ENSG00000002822	-0.469272	0.300465	-2.14699	0.0471567	-3.8812
ENSG00000157680	0.339507	7.74157	2.22544	0.0406069	-3.70599
ENSG00000055609	-0.301191	9.27961	-2.44822	0.0260182	-3.33101
ENSG00000075303	0.284838	5.0679	2.26308	0.0376054	-3.62402
ENSG00000008277	0.286425	8.2709	2.94242	0.00941126	-2.50592
ENSG00000164690	0.51468	2.32271	3.02184	0.00796635	-2.56028
ENSG00000064419	0.158686	6.38032	2.44519	0.0261772	-3.35679
ENSG00000164548	-0.287335	6.41515	-2.34052	0.0322692	-3.52692
ENSG00000006704	-0.239455	3.60559	-2.53997	0.0216134	-3.16114
ENSG00000146701	0.269052	6.09566	2.18416	0.0438782	-3.77511
ENSG00000198898	0.206294	7.38545	2.22608	0.0404348	-3.70809
ENSG00000081803	0.825682	6.45465	4.85081	0.000173464	0.788201
ENSG00000080802	-0.14115	6.66068	-2.3112	0.0342005	-3.57616
ENSG00000004799	-0.747606	5.75127	-2.21537	0.0414723	-3.70858
ENSG00000158560	0.40881	7.31568	2.81287	0.012399	-2.73601
ENSG00000157778	0.384562	3.49124	2.26167	0.0377099	-3.56961
ENSG00000183696	0.25342	4.69198	2.25402	0.038281	-3.62138
ENSG00000086300	0.496532	6.68473	2.12632	0.0492684	-3.86848
ENSG00000122566	-0.371816	8.83815	-3.18624	0.0056311	-2.08249
ENSG00000122512	0.302205	5.98242	3.02629	0.00789213	-2.3617
ENSG00000158321	-0.333078	6.70886	-2.89655	0.0103589	-2.58928
ENSG00000015676	0.224521	7.44263	2.30406	0.0346865	-3.58335
ENSG00000005483	-0.169008	8.39894	-2.17171	0.0449525	-3.78281
ENSG00000086289	0.598022	6.25212	3.34901	0.00404139	-1.80123
ENSG00000188191	0.460453	7.31657	2.59822	0.0193276	-3.10241
ENSG00000106459	-0.21294	4.4992	-2.44781	0.0260399	-3.30828
ENSG00000196367	-0.218538	7.24842	-2.26348	0.037576	-3.65118
ENSG00000102218	-0.424017	2.6137	-2.1964	0.0428458	-3.66053
ENSG00000180182	-0.273049	5.94678	-3.29982	0.00442597	-1.88071
ENSG00000165169	0.435351	6.44384	2.98573	0.0086488	-2.43721
ENSG00000187601	0.297374	5.0683	2.62082	0.0183283	-3.04625
ENSG00000182220	0.396904	6.8853	3.58232	0.00242617	-1.37735
ENSG00000147099	-0.171269	5.68572	-2.20836	0.0418591	-3.72513
ENSG00000188419	0.182851	6.72089	2.42256	0.0273946	-3.39472
ENSG00000198934	0.360268	5.79447	2.33493	0.032755	-3.53213
ENSG00000102390	-0.219487	3.65278	-2.20895	0.0418104	-3.64476
ENSG00000047597	0.51835	4.78905	2.30799	0.0345889	-3.54785
ENSG00000182916	0.402144	6.70597	4.14979	0.00072599	-0.374248
ENSG00000186462	0.508272	7.45008	2.92897	0.00977288	-2.5369
ENSG00000133131	-0.443369	3.74295	-2.27709	0.0366722	-3.54849
ENSG00000155961	0.437731	5.17079	3.05872	0.00738462	-2.3054
ENSG00000186310	0.330784	8.18022	3.40456	0.00354264	-1.69767
ENSG00000102265	-0.423579	2.42838	-2.89131	0.0104729	-2.76057
ENSG00000102178	0.31399	4.22501	2.43399	0.0267736	-3.32742
ENSG00000073464	0.358592	7.48131	2.74663	0.0141476	-2.84595
ENSG00000185825	0.228183	5.99952	3.02981	0.00783377	-2.35558
ENSG00000180879	0.280859	3.0498	2.39704	0.0288317	-3.37628
ENSG00000101911	0.477759	4.45395	2.19752	0.0429374	-3.70359
ENSG00000000003	-0.613584	4.32728	-2.29349	0.0355912	-3.53885
ENSG00000196924	-0.51089	6.28003	-3.49167	0.00297115	-1.5467
ENSG00000198689	0.320161	7.45057	2.66341	0.0167954	-2.98817
ENSG00000125354	0.295857	5.80538	2.92679	0.00972425	-2.53453
ENSG00000071553	0.3603	5.8052	2.79141	0.0128942	-2.7683
ENSG00000046651	-0.283833	6.18885	-2.28371	0.0361084	-3.6159
ENSG00000130830	0.395423	5.2702	3.78941	0.00156059	-1.02948
ENSG00000013619	-0.454422	4.41238	-3.02834	0.00785818	-2.37278
ENSG00000076716	-0.291637	4.20121	-2.14842	0.0470265	-3.75043
ENSG00000184634	-0.241089	5.7855	-2.1828	0.0439945	-3.76748
ENSG00000158301	0.409074	6.60326	2.70141	0.0156218	-2.92917
ENSG00000102181	0.268118	7.17681	3.33268	0.00412766	-1.82126
ENSG00000196338	-0.195756	6.67391	-2.27994	0.0363781	-3.62617
ENSG00000001497	-0.193178	6.11032	-2.1455	0.0472922	-3.83278
ENSG00000184083	-0.286448	5.75483	-2.38259	0.0296758	-3.44833
ENSG00000126733	0.521703	5.04191	2.39636	0.02903	-3.41527
ENSG00000102003	0.515852	8.71767	2.75515	0.0140133	-2.82866
ENSG00000204116	0.275258	6.54008	2.26011	0.0378255	-3.65778
ENSG00000102103	0.177986	4.65533	2.16494	0.0455464	-3.75608
ENSG00000067992	0.408275	7.72834	2.23258	0.0401043	-3.69517
ENSG00000186416	0.316884	5.31399	2.3348	0.0326379	-3.51949
ENSG00000169933	0.403412	7.44385	2.25224	0.0385928	-3.66737
ENSG00000125962	0.331594	4.12723	2.31591	0.0338833	-3.50594
ENSG00000166432	-0.412325	6.77933	-2.39642	0.0290261	-3.43942
ENSG00000184368	0.321305	7.01881	2.78017	0.0131982	-2.79036
ENSG00000173674	0.20632	6.63251	2.4525	0.0257953	-3.34536
ENSG00000120509	0.216065	5.02911	2.50061	0.0234086	-3.24202
ENSG00000005022	0.221019	5.43175	2.271	0.0370241	-3.62282
ENSG00000203879	0.214841	8.55365	2.34304	0.0321084	-3.50786
ENSG00000094631	-0.181992	5.97871	-2.12562	0.049141	-3.86107
ENSG00000180964	0.19456	5.92625	2.72516	0.0147895	-2.88254
ENSG00000089820	-0.533082	1.979	-2.68024	0.016224	-3.11109
ENSG00000101901	-0.206867	6.09573	-2.39477	0.0289623	-3.43591
ENSG00000102144	0.418595	7.69572	3.5989	0.0023419	-1.3518
ENSG00000168546	0.719933	3.98209	2.81738	0.0123226	-2.72246
ENSG00000147416	0.460712	8.19214	2.93032	0.00971983	-2.53103
ENSG00000240694	0.191793	9.20864	2.1245	0.0492472	-3.8388
ENSG00000147481	0.225026	6.4033	2.13952	0.0478418	-3.84702
ENSG00000165084	-0.521453	5.21351	-2.78592	0.013151	-2.77274
ENSG00000040341	0.223255	7.41685	2.21713	0.0411482	-3.72189
ENSG00000164949	-0.764907	3.07955	-2.31908	0.0338404	-3.48961
ENSG00000034239	-1.17235	3.41042	-2.48149	0.0244789	-3.25842
ENSG00000156486	0.88517	4.57664	2.6208	0.0184586	-3.04258
ENSG00000104313	-0.439504	4.14629	-3.02027	0.00799255	-2.39894
ENSG00000137547	0.322172	4.63245	2.49244	0.0237984	-3.24525
ENSG00000155097	0.346903	8.20124	2.24897	0.0387811	-3.66299
ENSG00000104490	0.593546	7.81345	2.37229	0.0304542	-3.47003
ENSG00000104388	0.298963	7.33318	3.01342	0.00810848	-2.38438
ENSG00000198846	0.409124	5.26666	2.19709	0.0429728	-3.73724
ENSG00000147676	0.697127	6.05304	2.20775	0.0420923	-3.73784
ENSG00000155926	-0.348798	4.28687	-2.13758	0.0480211	-3.76826
ENSG00000147655	0.9691	4.14768	2.21296	0.0416679	-3.67125
ENSG00000180155	0.375826	6.68167	2.86103	0.0111582	-2.65105
ENSG00000173334	-0.747969	4.39143	-2.69775	0.0157696	-2.91391
ENSG00000104450	-0.48472	4.44355	-2.15082	0.0469987	-3.75805
ENSG00000104435	0.426146	9.28439	2.43169	0.0270339	-3.35704
ENSG00000154328	0.164832	4.87951	2.25461	0.0382361	-3.62855
ENSG00000277586	0.580742	9.06486	3.41641	0.00349496	-1.6936
ENSG00000179091	0.241779	5.00694	2.53949	0.0216345	-3.1788
ENSG00000175073	0.180438	7.42308	2.72979	0.0146487	-2.87546
ENSG00000120526	0.250944	5.14568	2.47868	0.0244694	-3.28184
ENSG00000169427	0.55614	3.15145	2.1637	0.0458445	-3.70407
ENSG00000104218	-0.347881	7.12026	-2.875	0.0108357	-2.62661
ENSG00000070718	0.333974	6.66428	2.84642	0.0115009	-2.67637
ENSG00000078668	0.253918	6.43874	2.43717	0.026603	-3.37011
ENSG00000147684	0.215842	6.21151	2.8394	0.0116701	-2.68783
ENSG00000275074	0.385435	2.25584	2.58429	0.0197489	-3.16515
ENSG00000168481	0.455148	4.77313	3.1314	0.00632347	-2.18315
ENSG00000164830	0.444437	8.68661	2.18871	0.0436776	-3.74975
ENSG00000104522	0.289992	2.7426	2.16367	0.0456588	-3.69808
ENSG00000104643	0.275993	6.77681	2.37495	0.030132	-3.4723
ENSG00000104728	-0.554055	2.91493	-2.29347	0.0355337	-3.52853
ENSG00000132294	0.266948	7.98407	2.15205	0.0466975	-3.81691
ENSG00000104497	0.269658	4.58337	2.34119	0.0322264	-3.48271
ENSG00000048392	0.240289	5.939	3.08545	0.00696755	-2.25791
ENSG00000178209	-0.320491	8.19101	-2.14643	0.0473277	-3.82646
ENSG00000178125	-0.878939	0.774761	-2.2229	0.0408078	-3.77668
ENSG00000169139	0.331542	6.97078	2.55716	0.0208712	-3.16979
ENSG00000123908	-0.243599	7.13703	-2.68927	0.0159252	-2.94646
ENSG00000155970	0.318348	6.71977	2.36478	0.0307766	-3.48935
ENSG00000147465	0.352156	2.8311	2.31249	0.0341132	-3.49766
ENSG00000175324	0.254987	3.65746	2.7297	0.0146515	-2.86721
ENSG00000085788	0.207796	7.6797	2.39392	0.029012	-3.43556
ENSG00000147419	0.232946	6.5416	2.88319	0.0106521	-2.61267
ENSG00000134014	0.153273	6.19141	2.62431	0.0181978	-3.056
ENSG00000156172	-0.329082	3.29852	-2.49526	0.0236632	-3.23384
ENSG00000077782	-0.390388	6.52831	-2.60836	0.0188947	-3.08578
ENSG00000120875	-0.59621	3.24084	-2.50143	0.0234942	-3.23247
ENSG00000029534	0.319742	4.75277	2.43701	0.0266113	-3.33747
ENSG00000003987	0.271358	6.2384	2.22082	0.040853	-3.71878
ENSG00000003989	-0.387105	4.99665	-2.26787	0.0373942	-3.60635
ENSG00000137040	0.333729	6.54021	2.60628	0.0188817	-3.08763
ENSG00000164989	-0.184883	6.31518	-2.38525	0.0295186	-3.45399
ENSG00000106733	0.709056	4.10222	2.90294	0.0103173	-2.5828
ENSG00000083223	-0.208398	6.44349	-2.32039	0.0335841	-3.56039
ENSG00000134996	0.439138	4.89871	3.24766	0.00494406	-1.98098
ENSG00000078725	0.264512	6.44854	2.58444	0.0197429	-3.12441
ENSG00000180447	-0.440137	1.92262	-3.16127	0.0059366	-2.51012
ENSG00000241697	0.474006	1.37408	2.3191	0.0336699	-3.57428
ENSG00000181090	-0.243566	5.86241	-2.14588	0.0472571	-3.82695
ENSG00000136807	-0.259245	5.88564	-2.60842	0.0187991	-3.07802
ENSG00000167112	0.23538	5.11946	2.8502	0.0114107	-2.66139
ENSG00000167114	0.264449	4.32165	2.27651	0.0366244	-3.57206
ENSG00000165724	0.359829	3.43326	2.78659	0.0130238	-2.78836
ENSG00000165152	0.388447	6.47473	2.53285	0.022043	-3.21374
ENSG00000148090	0.208442	5.15058	2.13925	0.0478667	-3.81818
ENSG00000197355	-0.491096	3.04229	-3.09371	0.00684723	-2.3921
ENSG00000187713	0.282181	3.57978	2.35373	0.0314329	-3.43676
ENSG00000172889	0.604151	2.58549	2.55732	0.0209493	-3.17054
ENSG00000165716	0.301027	3.39207	2.15565	0.0463734	-3.71685
ENSG00000148335	0.267596	2.33157	2.22646	0.0404046	-3.62412
ENSG00000086062	-0.464537	2.52264	-2.50996	0.02297	-3.26105
ENSG00000106992	-0.957525	2.17854	-2.49131	0.0239999	-3.32247
ENSG00000167106	-0.302054	5.68923	-2.79123	0.0128989	-2.76588
ENSG00000136888	0.180911	5.76341	2.6373	0.0177199	-3.0298
ENSG00000164946	-0.676692	4.22863	-3.42421	0.00343909	-1.74727
ENSG00000198887	-0.311672	6.48277	-2.62959	0.0180018	-3.04771
ENSG00000096872	-0.29013	5.45485	-2.6058	0.0188999	-3.07472
ENSG00000165283	0.249173	4.23016	2.24092	0.0392771	-3.62291
ENSG00000155876	0.251412	5.15028	2.2116	0.0415953	-3.70737
ENSG00000122707	-0.176197	4.43583	-2.1584	0.0461272	-3.74865
ENSG00000147852	0.202577	5.61378	2.31611	0.0338694	-3.55586
ENSG00000175287	-0.673596	2.71825	-2.27202	0.0371251	-3.5661
ENSG00000137094	-0.366856	4.6382	-2.68553	0.0160486	-2.92985
ENSG00000107249	-0.539367	4.63094	-2.17964	0.0444527	-3.72182
ENSG00000186638	-0.707821	3.20313	-3.49536	0.00291995	-1.79483
ENSG00000148154	0.30505	5.62533	2.58718	0.0196326	-3.11247
ENSG00000148120	-0.340184	5.81194	-3.37342	0.00378525	-1.75197
ENSG00000106686	-0.416986	4.55509	-3.19505	0.00552709	-2.09106
ENSG00000196305	0.196857	7.50813	2.26508	0.0374574	-3.64518
ENSG00000148229	0.233066	5.04196	2.84365	0.0115674	-2.67187
ENSG00000080298	-0.326486	7.37941	-2.611	0.0187003	-3.0781
ENSG00000164970	0.222796	6.39981	3.30199	0.00440563	-1.87535
ENSG00000147862	-0.212928	8.13095	-2.77386	0.0133722	-2.79721
ENSG00000119397	-0.43601	6.68983	-2.70904	0.0154073	-2.91687
ENSG00000137124	0.325721	2.74748	2.19103	0.0432959	-3.66182
ENSG00000155886	0.456925	8.4108	3.25265	0.00489709	-1.96681
ENSG00000119508	-1.16281	5.01646	-3.73245	0.00179367	-1.19094
ENSG00000126883	-0.207576	6.06499	-2.15191	0.0467095	-3.82239
ENSG00000119383	0.274572	6.34051	2.13278	0.0484674	-3.85762
ENSG00000106948	-0.378398	4.4428	-2.34381	0.0320643	-3.46529
ENSG00000136811	-0.335461	5.43774	-2.16925	0.0452905	-3.77829
ENSG00000165023	0.729902	8.17835	2.87203	0.0110022	-2.63227
ENSG00000155158	0.382542	6.16354	3.24421	0.00498026	-1.97803
ENSG00000110442	0.23458	4.81537	2.52725	0.0221787	-3.1931
ENSG00000165973	0.580194	5.31123	2.61614	0.0186349	-3.0626
ENSG00000110107	0.350805	6.08475	3.55742	0.00255836	-1.4226
ENSG00000137691	-1.51065	1.13071	-3.12874	0.00643193	-2.81278
ENSG00000137672	-0.623813	3.64738	-2.43207	0.0270312	-3.32398
ENSG00000110013	0.220614	5.10764	2.16907	0.0451833	-3.77105
ENSG00000109971	0.272907	10.5442	2.65795	0.0169846	-2.97582
ENSG00000091664	0.970386	3.44282	2.67572	0.0164982	-2.95718
ENSG00000121621	-1.19236	-0.333829	-2.88848	0.010535	-3.37589
ENSG00000109929	0.174073	7.36323	2.36107	0.0309771	-3.49174
ENSG00000149547	0.214999	5.5815	2.71928	0.0149701	-2.8889
ENSG00000109956	-0.235181	7.58246	-2.54441	0.0214193	-3.18906
ENSG00000110318	-0.273448	6.78591	-2.30366	0.0347139	-3.58806
ENSG00000158555	0.504153	2.7068	3.0638	0.0072928	-2.44144
ENSG00000068831	0.419386	3.13341	3.07602	0.00710746	-2.37407
ENSG00000068971	0.227038	5.78008	2.3425	0.0321423	-3.51763
ENSG00000110042	0.308363	5.13869	3.33408	0.00411538	-1.82809
ENSG00000184524	0.403013	5.61156	3.01192	0.00813423	-2.38582
ENSG00000175602	0.38559	4.0489	2.13525	0.0483565	-3.77242
ENSG00000175573	0.394721	2.21566	2.30302	0.0347582	-3.53156
ENSG00000175550	0.19663	5.50572	2.23746	0.0395441	-3.67819
ENSG00000174684	0.322905	7.29046	2.28601	0.0360335	-3.61415
ENSG00000174576	-3.1718	1.01358	-3.04275	0.00770447	-2.95597
ENSG00000168092	0.189159	7.70939	2.20167	0.0424086	-3.74327
ENSG00000149115	-0.254798	5.22087	-3.10808	0.00664264	-2.21993
ENSG00000110619	0.30823	5.40969	3.61347	0.00227033	-1.3336
ENSG00000197345	0.322299	4.17634	2.12881	0.0488404	-3.78784
ENSG00000175582	0.244709	8.40749	2.89715	0.010346	-2.58369
ENSG00000129084	0.308344	4.04432	2.27171	0.0369722	-3.56939
ENSG00000255561	0.383616	1.15644	2.27037	0.0370697	-3.64695
ENSG00000070047	-0.231736	5.2777	-2.53657	0.021763	-3.18612
ENSG00000214517	0.310245	6.46712	2.38518	0.0295228	-3.45561
ENSG00000178202	-0.482071	3.50517	-2.35869	0.0312089	-3.42938
ENSG00000002330	0.378101	2.77279	2.17731	0.0444668	-3.6799
ENSG00000174516	0.483289	3.96401	3.45602	0.00317515	-1.67917
ENSG00000109919	0.261318	6.08673	3.01293	0.00811689	-2.38531
ENSG00000109920	-0.253443	7.1671	-2.91917	0.00988057	-2.54972
ENSG00000174080	0.150027	6.08975	2.27932	0.0364227	-3.62333
ENSG00000213593	0.189091	5.41716	2.52453	0.0223014	-3.21212
ENSG00000149575	0.392219	6.90059	3.20347	0.00542936	-2.05
ENSG00000182985	-0.261606	8.11866	-2.82047	0.012139	-2.71739
ENSG00000172757	0.215283	7.66072	2.52406	0.0223228	-3.2215
ENSG00000109832	0.24605	5.63813	2.98606	0.00858824	-2.4308
ENSG00000166483	-0.763831	1.95321	-2.5697	0.0204361	-3.24373
ENSG00000171204	0.264867	4.98325	2.3379	0.0324374	-3.50301
ENSG00000171202	0.329842	3.38624	2.25533	0.0381824	-3.57716
ENSG00000179071	-0.748193	1.57948	-2.21386	0.0415657	-3.69566
ENSG00000151366	0.380847	4.52617	2.12361	0.0494968	-3.81553
ENSG00000137507	0.453729	1.05276	2.31062	0.0342398	-3.61835
ENSG00000168014	-0.223367	6.07773	-3.01942	0.00800696	-2.37361
ENSG00000168066	-0.284614	6.90766	-2.87719	0.0107863	-2.62305
ENSG00000150773	-0.847944	1.96834	-2.86301	0.0111754	-2.89249
ENSG00000132254	0.219099	5.0198	2.51575	0.022702	-3.21767
ENSG00000239306	-0.316564	5.20717	-2.36822	0.030539	-3.45507
ENSG00000161328	-0.471816	2.00977	-2.86515	0.0110606	-2.88454
ENSG00000179119	-0.46758	5.19242	-3.20234	0.0054515	-2.05987
ENSG00000166199	0.264487	3.83054	2.41701	0.0277014	-3.34529
ENSG00000187240	-0.355585	8.15735	-2.48784	0.024076	-3.27964
ENSG00000019505	0.534497	7.33963	2.30635	0.0347007	-3.58103
ENSG00000172269	0.365821	2.78167	2.61116	0.0186942	-3.08486
ENSG00000110693	-0.270682	6.828	-2.20931	0.0417812	-3.73852
ENSG00000149582	0.263232	5.13039	2.31525	0.0339272	-3.54385
ENSG00000168056	-0.395076	5.57439	-2.41964	0.0276891	-3.38497
ENSG00000160613	-0.220041	5.22044	-2.3332	0.0327416	-3.51257
ENSG00000184154	-0.433524	3.17102	-2.52584	0.0222423	-3.19726
ENSG00000134333	0.480995	8.00919	3.16261	0.00596561	-2.12749
ENSG00000166444	-0.266926	5.19808	-3.17945	0.00571255	-2.09726
ENSG00000133812	-0.216455	7.43287	-2.99312	0.00846182	-2.42005
ENSG00000154096	0.442837	7.57862	2.51444	0.0229059	-3.24043
ENSG00000186174	-0.298662	3.8674	-2.17828	0.0443824	-3.69334
ENSG00000130413	-0.757232	4.41822	-2.23422	0.0399759	-3.628
ENSG00000165494	-0.238496	7.16345	-2.25282	0.0383709	-3.66869
ENSG00000030066	-0.293725	5.28564	-2.5079	0.0230656	-3.2326
ENSG00000162129	0.151583	6.19734	2.24742	0.03878	-3.6761
ENSG00000184281	0.298632	2.45008	2.3091	0.0343428	-3.51462
ENSG00000137700	0.382855	2.67462	2.85977	0.0111854	-2.74597
ENSG00000110721	-0.260476	6.00673	-2.5434	0.0214634	-3.18824
ENSG00000020922	-0.272216	5.75106	-2.56379	0.0205912	-3.1511
ENSG00000149177	-0.165127	6.64602	-2.41749	0.0276749	-3.4031
ENSG00000110057	-0.332599	1.78297	-2.32716	0.033136	-3.55053
ENSG00000174775	0.253641	4.59343	2.49806	0.0235299	-3.23433
ENSG00000189431	-1.04715	0.334102	-3.91583	0.0011925	-2.31495
ENSG00000110713	-0.168941	6.51328	-2.85154	0.0113788	-2.66747
ENSG00000166439	-0.246187	6.17551	-2.71786	0.0150141	-2.89581
ENSG00000162139	0.219856	5.16596	2.46794	0.0250054	-3.29893
ENSG00000182359	0.251977	4.57062	2.47649	0.0245776	-3.26934
ENSG00000149313	0.302627	6.83494	2.34199	0.0321752	-3.52554
ENSG00000149564	0.499382	1.719	2.98144	0.00867196	-2.74172
ENSG00000166313	0.24887	7.29396	2.28726	0.0358566	-3.61135
ENSG00000166435	-0.353888	5.09945	-3.26432	0.00477233	-1.95315
ENSG00000166436	-0.403855	5.51964	-3.07279	0.00715592	-2.27973
ENSG00000151655	-0.552381	2.19648	-2.33172	0.0328379	-3.51328
ENSG00000107611	-0.635324	3.98778	-3.26623	0.0047914	-2.02322
ENSG00000107614	-0.372742	4.76221	-2.30777	0.0345198	-3.53371
ENSG00000148481	0.187436	6.67916	2.34397	0.0320487	-3.52321
ENSG00000150051	0.409531	3.73034	2.13137	0.0487209	-3.76611
ENSG00000148426	-1.10976	-0.984974	-4.17179	0.000692983	-2.58228
ENSG00000136770	-0.237494	4.91938	-2.34008	0.0322977	-3.49162
ENSG00000122912	0.160919	6.07309	2.13516	0.0482461	-3.85063
ENSG00000107789	0.303536	3.85184	2.61071	0.0187111	-3.0483
ENSG00000148572	0.32298	4.0163	2.36394	0.0308006	-3.43019
ENSG00000175395	0.331129	7.3986	3.18894	0.00559898	-2.0758
ENSG00000241935	-0.579328	1.88395	-2.38313	0.0296443	-3.47734
ENSG00000196072	0.23723	5.77854	2.36329	0.0308405	-3.48402
ENSG00000107829	-0.1933	4.8339	-2.34339	0.032086	-3.48333
ENSG00000119979	0.174464	4.13975	2.23226	0.0399492	-3.63046
ENSG00000065154	0.248211	7.26234	2.82194	0.0121018	-2.71759
ENSG00000175470	0.208309	5.76698	2.18335	0.0439476	-3.77027
ENSG00000203780	-0.818816	3.2796	-2.67997	0.0163554	-2.97912
ENSG00000165660	0.203153	5.03993	2.38357	0.029618	-3.43176
ENSG00000119965	0.39764	3.95277	2.92155	0.0098315	-2.55276
ENSG00000165832	0.354205	5.94084	2.28128	0.0364239	-3.62077
ENSG00000151025	0.52449	7.10988	3.20676	0.00545757	-2.05209
ENSG00000138175	0.157049	6.19523	2.75993	0.0137634	-2.82484
ENSG00000188316	-0.776338	2.71707	-2.63167	0.0180536	-3.08926
ENSG00000170370	-0.479314	4.39738	-2.96076	0.00905639	-2.48369
ENSG00000138107	0.254444	7.11687	2.84523	0.0115293	-2.67787
ENSG00000196372	0.381367	3.18092	2.41545	0.0277882	-3.34728
ENSG00000148798	0.391803	7.50058	2.86812	0.0110061	-2.63752
ENSG00000176273	0.407059	2.49928	3.16125	0.00593684	-2.34208
ENSG00000138166	-0.926844	2.58927	-3.13731	0.00631708	-2.42332
ENSG00000265354	0.308222	4.97147	2.96891	0.00890296	-2.45882
ENSG00000180817	0.388622	6.29512	2.82685	0.0120121	-2.71132
ENSG00000107959	0.226539	6.61505	2.56724	0.0204471	-3.15395
ENSG00000078403	-0.137746	6.44571	-2.30453	0.0346549	-3.58613
ENSG00000132334	-0.227421	5.89545	-3.18651	0.00562781	-2.08036
ENSG00000136738	0.175931	5.88316	2.15704	0.0462481	-3.81384
ENSG00000197444	0.272682	5.88333	2.5487	0.0212332	-3.18011
ENSG00000138138	0.21351	6.74951	2.50924	0.0230035	-3.25087
ENSG00000107758	0.367656	8.0424	2.36289	0.0309812	-3.48335
ENSG00000107821	1.16442	-0.179382	4.26686	0.000566974	-2.05238
ENSG00000173267	0.637652	5.83682	2.61071	0.0188423	-3.07833
ENSG00000165731	0.427327	3.33768	2.18754	0.0436514	-3.67318
ENSG00000107872	0.498022	2.61954	2.71786	0.0150139	-2.94522
ENSG00000150054	0.585819	4.73035	2.84219	0.0117053	-2.67817
ENSG00000095637	-0.368039	9.15528	-2.31935	0.0337594	-3.54119
ENSG00000198879	-0.359719	6.42885	-3.23114	0.00512025	-2.00109
ENSG00000169740	0.240153	3.97494	2.13858	0.0479284	-3.76122
ENSG00000166228	0.336755	3.06205	2.82188	0.0121034	-2.75979
ENSG00000176171	0.257577	6.89746	2.97408	0.00880694	-2.45393
ENSG00000096746	-0.223489	6.81506	-2.11875	0.049795	-3.87989
ENSG00000151640	0.310041	4.37471	2.48896	0.0239667	-3.24419
ENSG00000165637	0.250976	5.75494	2.46929	0.0249376	-3.31047
ENSG00000095564	-0.251875	7.29554	-3.03269	0.00778648	-2.35089
ENSG00000122877	-1.49069	1.24246	-2.31585	0.0340567	-3.63081
ENSG00000138286	-0.150571	5.58486	-2.14319	0.0475039	-3.82446
ENSG00000182180	0.255082	5.33908	2.59999	0.0191259	-3.08578
ENSG00000138279	0.218565	6.81548	2.92403	0.00978062	-2.54148
ENSG00000108094	0.207347	6.32037	2.20278	0.0423172	-3.74802
ENSG00000156042	-0.887865	5.50255	-2.38854	0.0294855	-3.42369
ENSG00000165678	0.286534	8.37822	2.53489	0.0218374	-3.19668
ENSG00000107679	0.294124	6.98006	2.72311	0.0148521	-2.88838
ENSG00000120053	0.448997	7.1106	2.73269	0.0146769	-2.87564
ENSG00000123240	0.23352	8.1789	2.29802	0.0351035	-3.58478
ENSG00000151208	-0.295443	5.81037	-2.40952	0.0281203	-3.40634
ENSG00000067057	0.349037	6.92431	3.07466	0.00712786	-2.27728
ENSG00000148660	0.159549	7.64142	2.18508	0.0438001	-3.7702
ENSG00000155287	-0.134739	4.67656	-2.32149	0.0335105	-3.51209
ENSG00000171811	-0.663729	5.21501	-3.15319	0.00610943	-2.15227
ENSG00000151474	-0.213221	7.01719	-3.18539	0.00564124	-2.08197
ENSG00000156515	0.215363	8.09051	2.2039	0.0422249	-3.73497
ENSG00000139112	0.388223	8.33455	2.6642	0.0168228	-2.98261
ENSG00000139174	0.555385	4.70257	2.3099	0.0344588	-3.54122
ENSG00000151743	0.299868	5.28919	2.32531	0.0332577	-3.53335
ENSG00000178449	0.41286	3.68493	2.68136	0.0161866	-2.94025
ENSG00000139117	0.4078	5.08027	2.16134	0.046054	-3.78434
ENSG00000152556	0.272659	7.40184	3.05442	0.00743832	-2.31247
ENSG00000139291	0.190284	5.1703	2.4008	0.0286156	-3.40764
ENSG00000133640	-1.14627	4.31311	-2.7067	0.0154825	-2.90347
ENSG00000111252	-0.268356	4.94231	-2.93578	0.00954292	-2.51549
ENSG00000136026	0.199603	4.54235	2.39153	0.0291507	-3.40171
ENSG00000139324	0.173515	6.24305	2.28875	0.0357516	-3.61052
ENSG00000188596	-1.10107	5.37147	-2.5773	0.0201676	-3.11391
ENSG00000122965	-0.332286	5.91293	-2.46932	0.02494	-3.30943
ENSG00000111726	0.385793	6.54256	2.59124	0.019564	-3.11571
ENSG00000175727	-0.276961	5.39606	-2.46658	0.0250738	-3.30239
ENSG00000158023	-0.480405	4.39222	-2.67269	0.0165555	-2.952
ENSG00000111452	0.468479	1.69458	2.40146	0.0285778	-3.44803
ENSG00000135097	-0.414339	2.73607	-2.12921	0.0488027	-3.74391
ENSG00000089169	0.384684	7.33387	2.206	0.0422359	-3.74098
ENSG00000166111	0.491862	6.9738	2.73118	0.0147226	-2.87875
ENSG00000166987	-0.56338	2.6626	-3.44381	0.00325873	-1.9822
ENSG00000123297	0.391233	1.49852	2.19953	0.0425855	-3.69914
ENSG00000139182	0.330046	7.54212	2.18497	0.0439338	-3.77186
ENSG00000133858	-0.239541	7.1533	-2.82145	0.0121143	-2.71944
ENSG00000111652	0.330218	5.85017	3.09186	0.00687395	-2.2466
ENSG00000110811	-0.462217	3.38728	-2.82459	0.0120353	-2.75276
ENSG00000010626	-0.626742	3.80074	-2.15167	0.0469212	-3.72865
ENSG00000111674	0.417685	8.75301	3.38663	0.00368036	-1.73363
ENSG00000111669	0.303167	7.98926	2.16131	0.045911	-3.80294
ENSG00000204842	-0.200542	7.45191	-2.54103	0.0215671	-3.19553
ENSG00000078237	0.332402	4.00835	2.28967	0.0356868	-3.54184
ENSG00000197653	-0.844406	4.61147	-2.20328	0.0424594	-3.6794
ENSG00000087448	0.232624	6.98217	2.39969	0.028679	-3.43123
ENSG00000134531	-0.968862	3.59097	-2.20856	0.0420257	-3.64199
ENSG00000123066	-0.172921	8.00862	-2.4072	0.0282511	-3.41209
ENSG00000205693	0.729999	-0.588518	3.23872	0.00503859	-3.06123
ENSG00000139428	0.165307	4.34476	2.23244	0.0399351	-3.63892
ENSG00000110955	0.280209	7.93803	2.30468	0.0346439	-3.57686
ENSG00000111481	0.153848	5.4264	2.36531	0.0307165	-3.47222
ENSG00000111641	-0.472975	0.671959	-2.60379	0.018978	-3.41725
ENSG00000215021	0.171534	4.8414	2.32886	0.0330246	-3.51095
ENSG00000139190	0.504886	4.68381	2.98833	0.00860894	-2.43142
ENSG00000184575	0.165655	7.27141	2.74164	0.0142942	-2.85597
ENSG00000175203	0.219645	6.42849	2.72108	0.0149144	-2.89239
ENSG00000111667	0.255881	6.47773	2.35572	0.0313084	-3.50371
ENSG00000076108	-0.192884	6.69253	-2.17522	0.0446471	-3.79251
ENSG00000183735	0.182223	6.14473	2.32305	0.0334071	-3.55438
ENSG00000050426	0.223104	5.57169	2.73405	0.0145202	-2.86368
ENSG00000061936	-0.289666	6.48807	-2.56482	0.0205481	-3.15711
ENSG00000204856	0.31659	4.32402	2.76961	0.0134903	-2.79268
ENSG00000204852	-0.317274	5.06057	-2.39976	0.0286752	-3.39949
ENSG00000111540	0.119131	7.63253	2.20904	0.0418036	-3.73284
ENSG00000123411	-0.246529	3.83875	-2.33397	0.0326917	-3.46709
ENSG00000139641	0.405072	5.00792	3.69933	0.00189071	-1.19873
ENSG00000139579	0.273506	4.30845	2.81725	0.0122204	-2.71524
ENSG00000111711	0.263985	5.41941	2.21274	0.041503	-3.71481
ENSG00000172602	0.649301	4.29805	2.94347	0.00948194	-2.51251
ENSG00000130779	-0.178928	8.13664	-2.13191	0.0485496	-3.8483
ENSG00000184752	0.198129	5.56169	2.21093	0.0416496	-3.72195
ENSG00000075415	0.162514	7.80097	2.16444	0.0455902	-3.80034
ENSG00000152936	-1.36017	1.33842	-2.41733	0.0278401	-3.5423
ENSG00000072657	0.425995	6.33946	2.21159	0.0417785	-3.7347
ENSG00000196510	0.147273	5.56484	2.3575	0.031198	-3.48818
ENSG00000139405	0.393252	3.42131	2.44732	0.0260654	-3.29829
ENSG00000166578	-1.05102	1.82449	-2.84344	0.0116749	-2.95863
ENSG00000135457	-0.162375	5.68744	-2.4705	0.0248768	-3.30492
ENSG00000171681	-0.324735	7.34107	-2.4282	0.0271041	-3.38383
ENSG00000167548	-0.211691	7.32782	-2.25409	0.0382751	-3.66558
ENSG00000139436	-0.18219	5.97426	-2.79388	0.0128283	-2.76425
ENSG00000111262	0.341372	5.92455	2.16278	0.0458986	-3.80656
ENSG00000064763	0.211118	5.94806	2.1436	0.0474665	-3.83577
ENSG00000084444	0.401718	6.79055	2.7835	0.0131764	-2.7879
ENSG00000196498	-0.349481	7.30395	-2.74931	0.0140692	-2.84333
ENSG00000161791	-0.343558	6.01134	-2.38104	0.0298556	-3.4564
ENSG00000177084	-0.376374	4.75301	-2.28206	0.0363341	-3.57382
ENSG00000087470	0.210402	7.96765	2.55482	0.0209706	-3.16758
ENSG00000196876	0.383264	8.6025	2.14241	0.0477662	-3.82307
ENSG00000067715	0.540358	10.7163	2.12623	0.0492767	-3.8066
ENSG00000139323	-0.349392	5.09533	-2.506	0.0231548	-3.23114
ENSG00000018236	0.303479	9.4983	2.37903	0.0298878	-3.43605
ENSG00000111450	-0.255221	4.97603	-3.30234	0.00440236	-1.89046
ENSG00000027001	-0.33449	4.06745	-3.21194	0.0053328	-2.0894
ENSG00000152520	-0.172563	6.03108	-2.24297	0.0391195	-3.679
ENSG00000151778	0.301538	4.41783	2.69579	0.0157128	-2.91308
ENSG00000102554	-0.675584	2.93796	-2.6756	0.0164797	-3.00525
ENSG00000187498	-0.362934	3.74936	-2.47297	0.0247531	-3.25975
ENSG00000185950	-0.240041	6.47523	-2.26959	0.0371269	-3.64155
ENSG00000136159	0.272521	3.37081	2.26624	0.0373722	-3.56116
ENSG00000134874	-0.196526	7.70231	-2.41938	0.0275698	-3.39518
ENSG00000136143	0.433645	6.79075	3.14146	0.0062172	-2.16231
ENSG00000102466	0.337803	6.65249	2.91825	0.00989966	-2.55149
ENSG00000165572	0.27535	6.37533	2.49981	0.0234467	-3.26604
ENSG00000102760	-0.475521	4.74909	-2.17958	0.0444571	-3.72882
ENSG00000150457	-0.507834	2.49788	-2.50856	0.0230351	-3.26395
ENSG00000180730	-0.378431	1.25345	-2.12198	0.0494868	-3.81516
ENSG00000102786	-0.227451	6.69723	-3.35799	0.00391144	-1.77575
ENSG00000185352	0.591702	7.34542	2.22524	0.0406827	-3.70974
ENSG00000102524	0.472265	1.91318	2.56779	0.0204244	-3.21909
ENSG00000134899	0.252801	3.78784	2.85886	0.0112067	-2.66199
ENSG00000102678	0.443453	4.51847	2.74072	0.0143795	-2.84259
ENSG00000150401	0.185725	4.63808	2.27477	0.0367499	-3.58709
ENSG00000139505	0.334631	6.30747	2.61914	0.0183915	-3.06534
ENSG00000139910	0.202929	7.17936	2.94885	0.00928541	-2.4976
ENSG00000087301	0.230231	6.1159	2.41973	0.0275509	-3.39672
ENSG00000180998	0.425783	5.28341	3.50885	0.00283724	-1.51912
ENSG00000126773	-0.223393	7.10822	-3.40627	0.00352976	-1.69015
ENSG00000140015	0.966709	5.74834	3.07225	0.00724232	-2.28741
ENSG00000100650	-0.277263	8.4643	-2.68971	0.015911	-2.93824
ENSG00000197930	0.313679	5.88501	2.64775	0.0173441	-3.01397
ENSG00000198894	-0.218385	6.91534	-2.59335	0.0193868	-3.10971
ENSG00000151320	0.175581	9.16669	2.76041	0.0137498	-2.81331
ENSG00000100629	-0.472948	5.03159	-2.75411	0.0140224	-2.82382
ENSG00000205476	-0.261053	4.72648	-2.50381	0.0232577	-3.22516
ENSG00000080823	-0.340178	5.69751	-4.20456	0.000646625	-0.30343
ENSG00000100600	0.274615	4.98318	2.18328	0.0439538	-3.74432
ENSG00000131966	0.343578	6.02523	2.63679	0.0177383	-3.03369
ENSG00000100802	-0.433353	2.12028	-2.28292	0.036165	-3.57565
ENSG00000100804	0.375555	5.34697	2.89206	0.0104566	-2.59159
ENSG00000213983	-0.360741	4.04537	-2.76421	0.0136422	-2.8099
ENSG00000100604	0.395993	6.63843	2.44368	0.0264101	-3.36142
ENSG00000119703	-0.355221	3.76798	-2.36831	0.0305337	-3.41528
ENSG00000100575	0.201528	3.4753	2.78253	0.0131339	-2.79428
ENSG00000165409	-0.60196	2.61544	-2.55862	0.0208246	-3.19231
ENSG00000100503	-0.395493	8.45943	-4.28265	0.00054841	-0.165584
ENSG00000072042	0.17866	6.41822	2.19329	0.0431059	-3.763
ENSG00000100554	0.301899	6.7902	2.50704	0.0231058	-3.25446
ENSG00000139990	-0.164588	6.45008	-2.83212	0.0118482	-2.70093
ENSG00000100483	0.248006	3.36498	2.17489	0.0446762	-3.68906
ENSG00000100934	0.266406	6.87936	2.82431	0.0120425	-2.71455
ENSG00000119596	-0.181426	8.40526	-2.21469	0.0413449	-3.7158
ENSG00000100796	-0.311146	6.70343	-2.89534	0.0103853	-2.59143
ENSG00000174373	-0.156799	8.11327	-2.17568	0.0446076	-3.78024
ENSG00000100813	-0.311711	7.15175	-2.53322	0.0219115	-3.21031
ENSG00000100580	0.189334	7.00249	2.43574	0.0266797	-3.37214
ENSG00000126804	-0.234297	6.24295	-2.55317	0.0210411	-3.175
ENSG00000139970	0.395592	8.98243	2.51232	0.0229508	-3.22884
ENSG00000136367	-0.362542	5.05117	-3.15713	0.00598877	-2.13923
ENSG00000119636	-0.491833	4.32542	-2.45419	0.0258549	-3.29515
ENSG00000029364	0.181822	6.1816	2.82272	0.0120822	-2.71637
ENSG00000126214	0.27625	5.90834	3.94557	0.00111944	-0.738575
ENSG00000156030	-0.264993	5.73873	-2.87841	0.0107588	-2.61663
ENSG00000165861	0.158139	4.79317	2.18501	0.0438062	-3.73158
ENSG00000133961	-0.236445	6.24728	-2.75508	0.0139025	-2.83272
ENSG00000165516	0.209191	5.54024	2.20182	0.0423961	-3.73583
ENSG00000197119	-0.385963	4.89662	-2.51646	0.0226936	-3.20731
ENSG00000140105	0.27161	6.22338	3.22111	0.00523026	-2.01883
ENSG00000126821	0.219461	4.92489	2.40919	0.0281386	-3.38752
ENSG00000198732	-0.584404	5.25208	-2.20887	0.0420006	-3.70379
ENSG00000185650	-0.753264	6.28268	-2.13137	0.0487927	-3.85157
ENSG00000166068	-0.237565	7.61409	-2.62247	0.0182665	-3.05757
ENSG00000183324	0.583902	-0.585395	2.20473	0.0421561	-3.90601
ENSG00000156642	0.337625	7.8457	2.28637	0.0360272	-3.60808
ENSG00000178802	0.289672	4.88861	2.72418	0.0148195	-2.87109
ENSG00000173546	-0.346957	3.60597	-2.15835	0.0461314	-3.71358
ENSG00000138587	-0.756404	3.99453	-2.32524	0.0334313	-3.48296
ENSG00000178761	0.156759	4.90277	2.14855	0.0470143	-3.79132
ENSG00000169371	0.211151	3.91115	2.41506	0.0278097	-3.34941
ENSG00000181991	0.192207	4.76589	2.26607	0.0373847	-3.60536
ENSG00000140443	-0.196117	6.98384	-2.28301	0.0361581	-3.62114
ENSG00000184254	0.507248	2.39162	3.61186	0.00227811	-1.73674
ENSG00000166411	0.20178	5.9632	2.29777	0.0351205	-3.5927
ENSG00000170776	-0.287524	7.15544	-2.34284	0.032121	-3.52402
ENSG00000104154	0.351828	5.2144	3.30313	0.00439505	-1.8799
ENSG00000137842	0.212973	4.51045	2.45372	0.0257318	-3.30279
ENSG00000168806	0.229256	3.19941	2.27895	0.0364492	-3.54133
ENSG00000104093	0.231551	8.91997	2.26566	0.0374149	-3.62535
ENSG00000198838	-0.359896	8.4765	-2.34562	0.032052	-3.50935
ENSG00000128739	0.30465	7.09235	2.37519	0.0301175	-3.47073
ENSG00000137807	0.472193	1.18001	2.11954	0.0497198	-3.8071
ENSG00000184277	0.30379	6.12181	2.2687	0.0372115	-3.64168
ENSG00000137806	0.346969	4.22333	2.96439	0.00898782	-2.47507
ENSG00000058335	0.369473	7.27404	2.25231	0.0385869	-3.66888
ENSG00000103591	0.242423	6.31368	2.50358	0.0232683	-3.25958
ENSG00000175318	-0.697392	2.3745	-3.63255	0.00217985	-1.81055
ENSG00000136404	0.317479	3.88841	2.25846	0.0379485	-3.58447
ENSG00000182768	0.228078	6.4781	2.22453	0.0405574	-3.7146
ENSG00000103653	-0.190105	3.66363	-2.59529	0.0193103	-3.07628
ENSG00000172349	-0.429865	2.54376	-2.19286	0.0431424	-3.66733
ENSG00000173517	-0.227459	7.88916	-2.62633	0.0181225	-3.04938
ENSG00000235711	0.576899	3.15586	2.21186	0.041757	-3.63793
ENSG00000140545	-0.458113	4.8168	-2.62426	0.0182966	-3.03355
ENSG00000185043	-0.403632	2.57943	-3.00969	0.00817244	-2.57631
ENSG00000104142	0.212586	4.54936	2.41853	0.0276173	-3.35992
ENSG00000128965	0.588284	1.27738	2.23239	0.0399385	-3.67785
ENSG00000117906	0.231596	6.50989	2.35224	0.031526	-3.50938
ENSG00000261652	-0.50364	1.29127	-2.47446	0.0246787	-3.43725
ENSG00000067225	0.205581	9.18965	2.64183	0.0175561	-3.0117
ENSG00000184056	0.45287	1.77749	2.48764	0.0240306	-3.33531
ENSG00000170113	0.21288	6.8665	2.19607	0.0428739	-3.75851
ENSG00000140157	0.201117	4.57666	2.31767	0.0337649	-3.51897
ENSG00000128881	0.195306	8.03159	2.28578	0.0359618	-3.60643
ENSG00000140400	-0.197564	5.1516	-2.1686	0.0452241	-3.76678
ENSG00000167930	-0.218926	3.59942	-2.12142	0.0495402	-3.76643
ENSG00000242173	0.566929	4.19433	2.12062	0.04981	-3.80509
ENSG00000187535	-0.282263	5.16729	-2.55582	0.0209281	-3.1512
ENSG00000089486	0.158847	5.6446	2.19394	0.0430516	-3.75006
ENSG00000005339	-0.245996	7.51916	-2.26676	0.0373341	-3.64376
ENSG00000069345	0.23226	7.19352	2.56456	0.020559	-3.15658
ENSG00000069329	0.21191	7.72292	2.58526	0.0197097	-3.11845
ENSG00000129636	0.360361	7.18425	2.7698	0.013485	-2.80747
ENSG00000150394	0.453152	6.64639	2.37821	0.0300981	-3.46882
ENSG00000006007	0.282803	5.71401	3.17665	0.00574658	-2.09778
ENSG00000159593	0.177567	6.02031	2.33122	0.0328703	-3.53943
ENSG00000140948	-0.205051	6.19859	-2.80949	0.012419	-2.73892
ENSG00000005194	0.274919	4.66217	2.66098	0.0168795	-2.97246
ENSG00000103091	-0.209623	5.61428	-2.37731	0.0299903	-3.45445
ENSG00000104731	-0.241866	4.82762	-2.6569	0.0170215	-2.97908
ENSG00000102978	0.190641	4.94051	2.15136	0.0467597	-3.79043
ENSG00000103343	0.286779	3.27314	2.9861	0.00858746	-2.49395
ENSG00000103496	-0.340382	4.4516	-3.32626	0.00418431	-1.87366
ENSG00000167394	0.383846	1.52024	3.19854	0.00548629	-2.52763
ENSG00000140740	0.180622	7.29538	2.41577	0.0277703	-3.40304
ENSG00000089280	-0.394099	6.53405	-3.80051	0.00152413	-0.990283
ENSG00000103145	0.232475	4.25852	2.3235	0.0333773	-3.49694
ENSG00000090861	0.217424	8.05193	3.1756	0.00575926	-2.09975
ENSG00000103160	0.212292	6.11762	2.29481	0.0353265	-3.59915
ENSG00000063854	0.183141	5.66421	2.19373	0.0430697	-3.7514
ENSG00000102931	0.217425	2.70738	2.12288	0.0494013	-3.75134
ENSG00000159713	-0.623143	5.70843	-2.13804	0.04817	-3.82547
ENSG00000156858	-0.362207	2.97484	-3.18855	0.00560366	-2.26211
ENSG00000166780	0.323128	6.69457	2.74527	0.0141875	-2.85103
ENSG00000103168	-0.242586	4.03479	-2.50186	0.0233495	-3.21623
ENSG00000125166	0.320096	6.51359	2.2512	0.038603	-3.67298
ENSG00000258947	0.423676	2.63384	2.49077	0.0238792	-3.26259
ENSG00000065457	0.193448	4.90698	2.22791	0.0402909	-3.6716
ENSG00000159579	-0.253317	5.23028	-4.02838	0.000938941	-0.629184
ENSG00000186153	-0.327945	5.18139	-2.61999	0.0183594	-3.04553
ENSG00000162004	-0.987032	1.88845	-2.4794	0.0245823	-3.37465
ENSG00000122257	-0.217635	7.18412	-2.61235	0.0186487	-3.07705
ENSG00000067955	-0.294619	5.18362	-2.29917	0.0350234	-3.56332
ENSG00000174938	0.386197	6.02225	2.2785	0.0366554	-3.62645
ENSG00000140743	0.415124	4.44235	2.69971	0.0155865	-2.90698
ENSG00000132613	-0.432934	6.34056	-2.17868	0.0445355	-3.78492
ENSG00000159720	0.365168	5.78422	3.05995	0.0073522	-2.3024
ENSG00000157106	-0.19131	8.64054	-2.23329	0.0398683	-3.68326
ENSG00000127561	0.475678	4.89337	2.52174	0.0225707	-3.20885
ENSG00000065057	0.307401	2.05931	2.17538	0.0446329	-3.69677
ENSG00000140750	-0.305525	5.0512	-2.68825	0.0159587	-2.93057
ENSG00000161981	0.296754	4.21069	2.41698	0.0277028	-3.35315
ENSG00000103034	0.285788	9.25294	2.87517	0.0108319	-2.61861
ENSG00000174628	-0.408463	3.30352	-2.32613	0.0332041	-3.4753
ENSG00000102981	0.39677	2.24026	2.23059	0.0400796	-3.62126
ENSG00000124074	-0.47432	2.1497	-3.10613	0.00667012	-2.53187
ENSG00000129993	-0.406766	2.73736	-2.40086	0.0286121	-3.39098
ENSG00000083093	0.209125	4.6215	2.61383	0.0185923	-3.04827
ENSG00000102908	-0.153961	8.55797	-2.15436	0.0464886	-3.80714
ENSG00000172530	-0.31421	3.64196	-2.87144	0.0109166	-2.65623
ENSG00000167978	-0.427086	9.38792	-2.88781	0.0105608	-2.59801
ENSG00000185716	0.269651	5.93698	2.25427	0.0382618	-3.66177
ENSG00000175267	-0.649727	5.10288	-2.5941	0.0194903	-3.08642
ENSG00000198373	-0.202547	5.41445	-2.24817	0.0387224	-3.65521
ENSG00000181350	0.238185	3.31128	2.26689	0.0373249	-3.55896
ENSG00000108590	0.463214	2.79685	2.68073	0.0162077	-2.98008
ENSG00000171962	-0.768325	3.86881	-2.15719	0.0464246	-3.72133
ENSG00000167693	-0.462994	2.70967	-2.62745	0.0180811	-3.08918
ENSG00000108344	0.196803	5.55557	2.5003	0.0234233	-3.25509
ENSG00000125686	-0.172444	5.94652	-2.20889	0.0418154	-3.73111
ENSG00000126581	0.168171	6.08708	2.1667	0.0453911	-3.80186
ENSG00000173801	-0.488004	2.45328	-2.6939	0.0157743	-3.02605
ENSG00000141232	-0.576019	5.27059	-2.39819	0.028924	-3.4103
ENSG00000154240	-0.254918	6.09265	-2.12955	0.0487703	-3.85737
ENSG00000181610	0.25255	6.34533	2.4087	0.0281664	-3.41673
ENSG00000129255	0.270011	2.58424	2.68556	0.0160476	-2.99856
ENSG00000109084	0.287935	3.38224	2.22042	0.0408851	-3.62649
ENSG00000132386	0.819115	4.42761	2.31985	0.0337888	-3.51749
ENSG00000141030	0.285255	5.71376	2.61391	0.0185892	-3.06895
ENSG00000167258	-0.147197	6.74277	-2.28425	0.0360704	-3.61971
ENSG00000170043	0.346757	3.39354	2.46397	0.025206	-3.27433
ENSG00000065559	0.347946	7.66854	2.20271	0.0424784	-3.74289
ENSG00000175931	0.245399	6.35793	2.26533	0.0374391	-3.64889
ENSG00000141569	0.246113	2.8976	2.12061	0.0496174	-3.75515
ENSG00000007168	0.207087	9.17472	2.3336	0.0327156	-3.51385
ENSG00000153944	-0.444889	7.90417	-2.19627	0.0430418	-3.75351
ENSG00000167716	-0.200895	3.06868	-2.20009	0.0425389	-3.64936
ENSG00000109103	0.308424	4.3238	2.91968	0.00987008	-2.54745
ENSG00000198242	-0.330321	4.60816	-2.73321	0.0145454	-2.85205
ENSG00000108963	-0.308799	4.09552	-2.1194	0.0497336	-3.78894
ENSG00000159111	0.27604	3.73177	2.70039	0.0155647	-2.91057
ENSG00000108854	-0.238259	6.20361	-2.24162	0.0392234	-3.68313
ENSG00000108654	-0.277505	9.40944	-2.64955	0.0172802	-2.99824
ENSG00000189159	0.327088	4.97141	2.30817	0.0344058	-3.54949
ENSG00000125447	0.178077	5.2843	2.38299	0.0296524	-3.43957
ENSG00000108666	0.267639	5.10525	3.46593	0.00310885	-1.59889
ENSG00000131470	-0.522614	2.42394	-2.80438	0.0125517	-2.88592
ENSG00000141699	0.146189	5.39529	2.29163	0.0355493	-3.58887
ENSG00000089558	1.0276	1.43943	2.48028	0.0245386	-3.36962
ENSG00000213424	0.533546	4.10151	2.5669	0.0205981	-3.12121
ENSG00000225663	0.272378	3.99782	2.3631	0.0308523	-3.43016
ENSG00000185105	0.656039	0.18314	2.12211	0.0494744	-3.87851
ENSG00000167695	-0.227285	2.68176	-2.153	0.0466117	-3.7132
ENSG00000141576	0.243576	6.7232	2.61334	0.018611	-3.07598
ENSG00000132510	-0.483043	3.80404	-2.37306	0.0303545	-3.40981
ENSG00000153933	0.353292	6.50826	2.99505	0.00842767	-2.41725
ENSG00000141560	0.241016	4.6562	3.19557	0.00552095	-2.07734
ENSG00000132589	0.357096	5.96245	3.67456	0.00199319	-1.2161
ENSG00000109118	-0.189686	5.20846	-2.22291	0.0406866	-3.68549
ENSG00000167863	0.160321	6.79064	2.17421	0.0447349	-3.79417
ENSG00000108389	0.171224	7.07464	2.62375	0.0182184	-3.05756
ENSG00000168792	-0.427226	1.54813	-2.17116	0.0450007	-3.74459
ENSG00000153822	-0.466015	5.43314	-2.16263	0.0459395	-3.78488
ENSG00000108395	0.285631	8.20547	2.56108	0.0207053	-3.15481
ENSG00000153982	0.374032	4.90555	4.5142	0.00033736	0.172657
ENSG00000126861	0.309477	6.46814	4.39462	0.000433354	0.0494734
ENSG00000092931	0.242509	4.7993	2.75209	0.0139888	-2.8234
ENSG00000062725	0.139006	7.04119	2.23145	0.040012	-3.70244
ENSG00000178502	0.249189	6.01483	2.41445	0.0278437	-3.40419
ENSG00000258890	-0.281062	6.14474	-2.13214	0.0485275	-3.85381
ENSG00000131467	0.157119	5.58301	2.19831	0.0426866	-3.74188
ENSG00000074660	0.417097	1.38403	2.43781	0.0265687	-3.43812
ENSG00000183914	-1.02461	4.67261	-3.4392	0.00333911	-1.70082
ENSG00000055483	-0.279931	5.61967	-2.43364	0.026792	-3.36292
ENSG00000277972	0.31516	2.75493	2.1312	0.0486157	-3.74057
ENSG00000174326	-0.820916	-0.66298	-2.91157	0.0100388	-3.40179
ENSG00000108528	0.206727	4.73832	2.36829	0.030535	-3.44593
ENSG00000078687	-0.17778	7.1803	-2.15139	0.0467571	-3.82849
ENSG00000277161	0.275466	2.23181	2.32216	0.0334665	-3.5068
ENSG00000266074	-0.214494	4.55613	-2.3516	0.0315661	-3.46021
ENSG00000141378	0.173737	3.95084	2.16426	0.0456067	-3.72313
ENSG00000141367	0.223172	9.91472	2.5867	0.019652	-3.09623
ENSG00000129245	0.205323	6.2134	2.22447	0.0405624	-3.71256
ENSG00000172794	0.470865	2.42309	2.83478	0.011783	-2.80091
ENSG00000197170	0.248303	6.79997	2.54418	0.0214294	-3.19233
ENSG00000141582	0.279333	4.38748	2.49174	0.0238323	-3.24006
ENSG00000173821	-0.458532	7.77526	-2.30417	0.0348507	-3.58426
ENSG00000073969	0.510528	7.96577	2.93006	0.00975071	-2.53363
ENSG00000171634	-0.32878	8.89644	-2.33949	0.0323351	-3.51142
ENSG00000231824	0.743249	0.847618	2.44777	0.0260421	-3.48384
ENSG00000152214	0.543508	3.8501	3.35186	0.00396277	-1.85672
ENSG00000081138	0.443351	5.03981	2.35253	0.0316729	-3.48495
ENSG00000101493	-0.378071	5.08273	-2.60498	0.0189316	-3.06734
ENSG00000150477	-0.181912	5.46398	-2.32412	0.0333364	-3.53655
ENSG00000177426	-0.685012	2.50223	-2.17527	0.0448304	-3.6919
ENSG00000134440	0.227233	7.61397	3.32249	0.00421799	-1.84018
ENSG00000074657	-0.232526	7.55494	-2.16365	0.0456603	-3.80626
ENSG00000134265	0.280746	7.52391	2.34233	0.0321536	-3.52064
ENSG00000171791	-0.403665	6.09395	-2.61359	0.0186993	-3.07362
ENSG00000101654	0.215555	7.01497	2.45615	0.0256064	-3.33822
ENSG00000131196	-0.698851	1.88851	-2.54952	0.0212113	-3.28375
ENSG00000053747	-0.396237	4.32847	-2.29988	0.0350392	-3.5297
ENSG00000082397	0.254952	8.47638	2.80213	0.0126104	-2.74617
ENSG00000206418	0.200381	6.21831	2.36777	0.0305666	-3.48273
ENSG00000178342	-0.727026	0.0353462	-2.50027	0.023425	-3.617
ENSG00000166377	-0.178028	6.76406	-2.68251	0.0161486	-2.95869
ENSG00000134278	0.134329	7.46952	2.24446	0.0390055	-3.67854
ENSG00000152234	0.270252	8.41138	2.77763	0.0132681	-2.78837
ENSG00000154832	-0.207208	4.07357	-2.35655	0.0312573	-3.43841
ENSG00000180011	0.300308	6.12944	2.75829	0.0138102	-2.82729
ENSG00000132872	0.499168	7.85208	2.81946	0.0122698	-2.72394
ENSG00000125827	0.242737	8.0314	2.61129	0.0186892	-3.07229
ENSG00000101474	0.201498	6.45711	2.63578	0.0177751	-3.03764
ENSG00000149639	-0.302517	7.00307	-2.50296	0.0232978	-3.26114
ENSG00000182621	0.484195	8.38266	3.26398	0.0048072	-1.95028
ENSG00000054803	0.549555	4.34007	2.28827	0.0359583	-3.56013
ENSG00000089101	-0.583492	3.03256	-2.62448	0.0182563	-3.06575
ENSG00000197586	0.346621	6.04066	2.75733	0.0138377	-2.82824
ENSG00000132821	0.480164	4.36064	2.53488	0.0219713	-3.1752
ENSG00000158470	0.287963	5.92014	2.60928	0.0187662	-3.07934
ENSG00000101079	0.425156	7.34984	3.10837	0.00665114	-2.21889
ENSG00000149657	0.255571	5.64682	2.6802	0.0162254	-2.95623
ENSG00000197296	0.227436	4.27333	2.48041	0.0243843	-3.25539
ENSG00000132824	0.278706	8.25979	3.52929	0.0027164	-1.47893
ENSG00000171552	0.219941	4.83445	2.91854	0.00989366	-2.54449
ENSG00000124207	0.22157	6.58729	2.69903	0.0156083	-2.93027
ENSG00000132622	0.479449	1.34922	2.14399	0.0474301	-3.77105
ENSG00000101222	-0.557079	2.18996	-2.32989	0.0329574	-3.51228
ENSG00000125841	0.33752	5.4393	2.17862	0.0444817	-3.77013
ENSG00000124217	0.392956	3.25423	2.8106	0.0123906	-2.7609
ENSG00000173418	0.19607	5.28725	3.23744	0.00505233	-1.99374
ENSG00000124228	-0.355057	5.25575	-2.64117	0.0175798	-3.01252
ENSG00000171940	-0.452418	3.63799	-2.32	0.033661	-3.48469
ENSG00000197114	-0.412758	1.66462	-2.57886	0.0199688	-3.27951
ENSG00000125814	0.36921	9.73924	2.35609	0.031322	-3.46958
ENSG00000124140	0.328955	7.55067	2.15721	0.0463684	-3.81519
ENSG00000101040	-0.277972	7.20441	-2.677	0.0163327	-2.96729
ENSG00000101460	0.302015	4.39846	2.15774	0.0461862	-3.75417
ENSG00000258366	-0.373286	2.23214	-2.57933	0.0199496	-3.20089
ENSG00000101473	0.256943	4.16243	2.37289	0.0302559	-3.41938
ENSG00000101350	0.151643	7.66993	2.23556	0.0396921	-3.69048
ENSG00000197183	-0.226383	5.90299	-2.35886	0.0311133	-3.49095
ENSG00000101109	-0.17217	6.684	-2.90825	0.0101087	-2.56905
ENSG00000131044	-0.887462	2.69393	-2.98214	0.00874651	-2.63554
ENSG00000125510	0.801755	0.994348	3.80622	0.00150569	-2.00067
ENSG00000101152	0.211825	7.78313	2.15694	0.0462574	-3.81239
ENSG00000198276	-0.290193	3.64959	-2.23318	0.0398772	-3.60971
ENSG00000125848	0.590694	5.15668	3.05845	0.00745499	-2.31137
ENSG00000132639	0.54102	10.7477	2.36838	0.0306922	-3.43845
ENSG00000127663	-0.317451	5.08674	-2.67439	0.0164204	-2.95362
ENSG00000127527	-0.209297	5.36623	-2.23794	0.0395068	-3.66847
ENSG00000250067	-0.488655	4.11758	-2.2559	0.0383169	-3.58827
ENSG00000105173	0.439303	1.75675	2.86585	0.0110445	-2.86865
ENSG00000269190	0.565948	2.53854	4.34824	0.000477704	-0.711184
ENSG00000121289	-0.258828	5.37111	-3.02878	0.00785088	-2.35597
ENSG00000176396	0.337341	3.83814	2.25421	0.0382667	-3.589
ENSG00000204851	0.352981	6.00632	2.17119	0.0451855	-3.79536
ENSG00000213023	0.411237	3.02127	2.29514	0.0353035	-3.51891
ENSG00000197019	-0.64844	0.388669	-2.36451	0.0307654	-3.67008
ENSG00000042753	0.523469	4.35659	2.41487	0.0279771	-3.36402
ENSG00000179115	0.230411	5.16505	2.78605	0.0130383	-2.77058
ENSG00000179262	0.297787	5.21639	2.63963	0.0176354	-3.01751
ENSG00000179271	0.238312	4.10666	2.38574	0.02949	-3.3979
ENSG00000108107	-0.247533	5.06713	-2.21142	0.0416095	-3.69713
ENSG00000179954	-0.772295	1.62903	-3.35063	0.0039731	-2.40286
ENSG00000013275	0.251078	5.82757	2.72495	0.0147958	-2.88199
ENSG00000248098	0.52149	0.516259	2.46067	0.0253744	-3.52944
ENSG00000105649	0.393434	6.28898	2.19179	0.043418	-3.76645
ENSG00000039650	-0.2239	3.42434	-2.1168	0.0499829	-3.7672
ENSG00000063176	0.23933	3.35408	2.26416	0.0375255	-3.56323
ENSG00000105516	0.368121	4.12395	2.69569	0.0157162	-2.91266
ENSG00000198003	-0.805471	1.88377	-3.048	0.00753957	-2.69006
ENSG00000196361	-0.220241	6.81158	-2.34403	0.0320447	-3.52309
ENSG00000130176	0.714334	1.11389	3.82754	0.00143891	-1.90669
ENSG00000099800	0.298471	3.69548	2.18275	0.0439987	-3.68827
ENSG00000011304	-0.360401	4.20749	-3.04497	0.00758789	-2.35223
ENSG00000123144	0.249499	5.02629	3.04248	0.00762779	-2.33295
ENSG00000167815	0.388692	5.98295	3.65386	0.00208306	-1.25252
ENSG00000090006	-0.254303	3.91693	-2.11922	0.0497505	-3.77934
ENSG00000105669	0.187924	4.20458	2.33186	0.0328289	-3.48302
ENSG00000176490	0.461679	6.13036	2.47514	0.0247934	-3.30775
ENSG00000213339	-0.208789	4.07294	-2.25313	0.0383474	-3.59289
ENSG00000099203	-0.474923	0.612333	-2.6887	0.015944	-3.33916
ENSG00000087903	-0.783704	3.2334	-3.1892	0.0056535	-2.24703
ENSG00000167642	0.437224	4.47659	2.52276	0.0224771	-3.19584
ENSG00000105254	0.218687	6.67772	2.98085	0.00868268	-2.44222
ENSG00000099785	0.302141	4.00819	2.6868	0.0160066	-2.9275
ENSG00000257103	-0.231705	6.366	-2.14358	0.0474681	-3.83961
ENSG00000105607	-0.324279	3.78825	-2.88214	0.0106755	-2.63144
ENSG00000105701	0.18288	7.36632	2.29081	0.0356064	-3.60535
ENSG00000006015	0.317928	4.17051	3.35222	0.00395971	-1.83994
ENSG00000104936	-0.349422	4.10932	-2.79164	0.0128881	-2.76365
ENSG00000188039	-0.820115	5.33879	-2.82196	0.0122065	-2.71307
ENSG00000099624	0.254463	3.84029	2.26232	0.0376615	-3.57689
ENSG00000105711	0.742035	3.88169	3.89781	0.00125672	-0.976178
ENSG00000142549	0.402783	3.21932	2.75815	0.0138145	-2.84363
ENSG00000167615	-0.377307	7.06487	-2.37612	0.0302129	-3.4725
ENSG00000174917	0.348913	3.1951	2.14752	0.047108	-3.72377
ENSG00000167470	-0.53024	3.37172	-2.22939	0.0403511	-3.61231
ENSG00000008441	-0.321387	7.09608	-2.35728	0.0312534	-3.5013
ENSG00000105202	-0.455558	3.47038	-4.28726	0.000543108	-0.547592
ENSG00000070423	0.474903	2.55797	3.36091	0.00388728	-2.05093
ENSG00000205138	0.509101	2.40884	2.79516	0.0127943	-2.85642
ENSG00000130159	0.204195	4.21956	2.27681	0.0366029	-3.56715
ENSG00000126267	0.305176	5.57691	2.41449	0.0278416	-3.39644
ENSG00000105255	0.473096	4.03413	3.54431	0.00263083	-1.53356
ENSG00000105639	0.480019	2.80052	2.3783	0.029931	-3.40704
ENSG00000011485	0.201996	5.80638	2.37937	0.0298673	-3.45824
ENSG00000127540	0.321308	4.26951	2.37196	0.030312	-3.42424
ENSG00000129351	-0.162463	7.11037	-2.21414	0.0413895	-3.73028
ENSG00000105486	-0.263442	4.24482	-2.32633	0.0331909	-3.48848
ENSG00000172081	-0.316023	3.39917	-2.7003	0.0155677	-2.93106
ENSG00000130751	0.712202	0.862665	2.42835	0.0270784	-3.50727
ENSG00000130748	0.609082	1.9956	2.45675	0.0255855	-3.34883
ENSG00000105221	-0.191881	5.9505	-2.14475	0.047361	-3.83069
ENSG00000090013	0.332045	2.988	2.5355	0.0218103	-3.1816
ENSG00000125740	-1.23028	2.62428	-2.16117	0.0460689	-3.70815
ENSG00000100354	-0.172386	8.54919	-2.26653	0.037351	-3.63179
ENSG00000186976	-0.46687	5.51499	-4.12509	0.000764944	-0.450514
ENSG00000100316	-0.236575	7.86227	-2.53856	0.0216753	-3.19676
ENSG00000100422	0.240872	6.20986	2.99006	0.00851647	-2.42563
ENSG00000100362	1.64084	-0.0523318	3.66256	0.00208001	-2.3369
ENSG00000100266	-0.241631	5.69632	-2.20469	0.0421593	-3.7312
ENSG00000278195	0.592347	3.37192	2.2567	0.038257	-3.57851
ENSG00000100335	0.184942	5.5282	2.4274	0.0271298	-3.37407
ENSG00000131100	0.318917	7.80741	2.35747	0.0312052	-3.49334
ENSG00000243156	-0.288187	7.13739	-3.01381	0.00810188	-2.38427
ENSG00000075275	-1.20692	1.55331	-2.5199	0.0226548	-3.38712
ENSG00000100138	0.219451	6.10506	2.55741	0.0208604	-3.16812
ENSG00000183597	0.211459	4.20892	2.73991	0.0143454	-2.84158
ENSG00000040608	0.87719	2.82779	2.1287	0.0490433	-3.74714
ENSG00000242259	0.168954	5.13749	2.36748	0.0305842	-3.46027
ENSG00000128346	-0.471447	0.743918	-2.14406	0.0474237	-3.83799
ENSG00000184117	0.347487	5.72247	2.9473	0.00931561	-2.49852
ENSG00000100284	0.200673	4.84843	2.61101	0.0186996	-3.05736
ENSG00000196576	-0.374982	5.62494	-2.73823	0.0143953	-2.85429
ENSG00000100038	-0.788487	-0.652157	-2.24326	0.0390973	-3.9122
ENSG00000130540	0.435083	7.47986	2.27278	0.0370694	-3.63415
ENSG00000100345	-0.285839	7.5505	-2.61549	0.0185292	-3.06997
ENSG00000128272	0.213475	6.71763	2.27588	0.0366702	-3.63266
ENSG00000100154	-0.214283	6.17655	-2.75444	0.0139209	-2.83328
ENSG00000070413	0.208515	5.92558	2.204	0.0422166	-3.7407
ENSG00000100325	-0.265758	4.45987	-2.32473	0.0332961	-3.49644
ENSG00000167065	-0.561957	2.70439	-3.77647	0.00160418	-1.50881
ENSG00000253352	-0.282054	7.35906	-2.7544	0.0139221	-2.83423
ENSG00000100097	0.409526	4.16788	2.11846	0.0499946	-3.80403
ENSG00000100393	-0.234938	7.52718	-2.55054	0.021154	-3.17919
ENSG00000100401	0.208194	6.52875	2.36158	0.0309455	-3.49431
ENSG00000100376	-0.856758	4.68782	-2.80286	0.0126985	-2.74329
ENSG00000241837	0.223425	5.4334	2.31607	0.0338722	-3.55199
ENSG00000184900	0.303576	6.06143	2.47824	0.0244913	-3.29944
ENSG00000159082	0.320572	7.96804	2.21214	0.0416449	-3.72395
ENSG00000155304	0.300025	6.87832	2.27237	0.0369356	-3.63763
ENSG00000183527	0.313406	4.08544	2.13352	0.0483987	-3.77571
ENSG00000182240	0.438845	2.80012	2.47521	0.0246415	-3.27234
ENSG00000160188	-0.907836	4.60758	-2.69069	0.0159995	-2.92479
ENSG00000177692	0.341935	3.67594	2.82954	0.0119122	-2.71018
ENSG00000159140	-0.220819	8.67396	-2.46416	0.0251967	-3.31187
ENSG00000198888	-0.43924	10.4582	-2.81895	0.0121775	-2.71152
ENSG00000198763	-0.48268	10.3717	-2.2507	0.0387091	-3.63191
ENSG00000198899	-0.593021	10.8165	-3.42892	0.00338854	-1.68867
ENSG00000198840	-0.412473	10.4942	-2.80821	0.0124523	-2.72929
ENSG00000212907	-0.463955	8.57135	-2.62123	0.0184424	-3.05759
ENSG00000198886	-0.415593	11.9003	-2.32141	0.03353	-3.50059
ENSG00000198786	-0.394138	11.2722	-2.11851	0.0499402	-3.81548
ENSG00000198695	-0.489418	8.92954	-2.53398	0.0220191	-3.19898

## Sheet: MF
Class	FMT	CSDS	CUMS
transcription regulator activity	0.045	0.033	0.074
molecular transducer activity	0.182	0.133	0.02
binding	0.273	0.433	0.377
ATP-dependent activity	0.045	0.033	0.049
molecular function regulator	0.091	0.033	0.025
catalytic activity	0.273	0.3	0.333
transporter activity	0.091	0.033	0.069
translation regulator activity	0	0	0.005
cytoskeletal motor activity	0	0	0.01
molecular adaptor activity	0	0	0.025
structural molecule activity	0	0	0.015

## Sheet: PC
Class	FMT	CSDS	CUMS
protein modifying enzyme	0.192	0	0.147
transporter	0.154	0.08	0.12
scaffold/adaptor protein	0.115	0.12	0.033
transmembrane signal receptor	0.077	0.24	0.016
cytoskeletal protein	0.077	0.08	0.065
structural protein	0.038	0	0.005
extracellular matrix protein	0.038	0.04	0.005
intercellular signal molecule	0.077	0.04	0.011
gene-specific transcriptional regulator	0.077	0.04	0.087
translational protein	0.077	0	0.016
metabolite interconversion enzyme	0.077	0.2	0.207
transfer/carrier protein	0	0.04	0.016
chromatin/chromatin-binding, or -regulatory protein	0	0.04	0.027
RNA metabolism protein	0	0.08	0.098
DNA metabolism protein	0	0	0.016
cell adhesion molecule	0	0	0.016
protein-binding activity modulator	0	0	0.038
calcium-binding protein	0	0	0.011
membrane traffic protein	0	0	0.038
chaperone	0	0	0.027
