# Supplementary material for: Systematical comparison reveals distinct brain transcriptomic features in models of depression induced by gut microbiota dysbiosis and chronic stress
Source: Research Square preprint supplement (doi:10.21203/rs.3.rs-4134877/v1), 2024-03-29
Supplement: Supplementary file 6 [file 8e0542310cbfa09f37e1f0a7.docx]

## Supplementary files


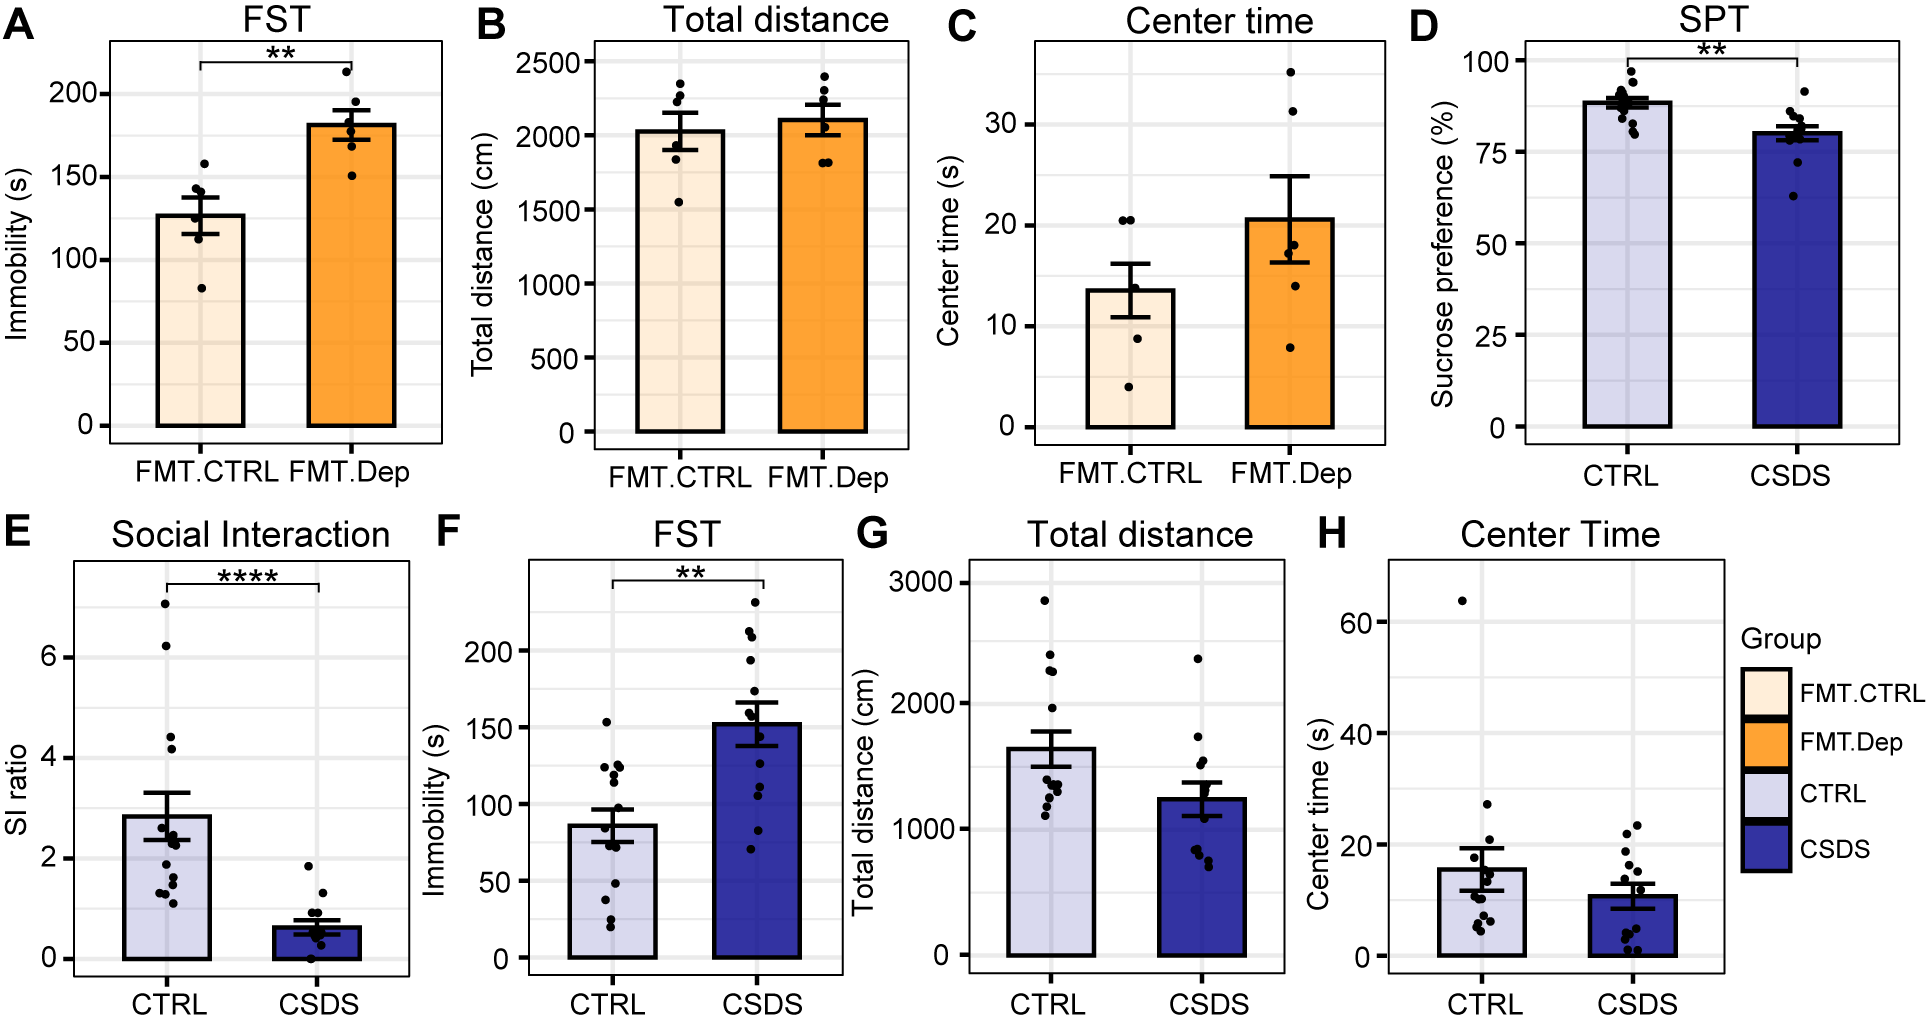


**Fig S1. Gut microbiota dysbiosis and CSDS induced depressvie-like behvaviors in mice.** (A) FST experiments in FMT mouse model. “Depression microbiota” significantly increased immolility time. (B-C) OFT experiments in FMT mouse model. (D) SPT experiments in CSDS mouse model. Chronic stress significantly decreased the sucrose preference. (E) SIT in CSDS mouse model. Chronic stress induced the social avoidance behavior. (F) FST experiments in CSDS mouse model. (G-H) OFT experiments in CSDS mouse model. Data are expressed as mean ± SEM. Wilcox–rank test, *p＜0.05, **p＜0.01, ***p＜0.001, ****p < 1e-04. FMT, fecal microbiota transplantation. CSDS, chronic social defeat stress. CTRL, control group. FST, force swimming test. OFT, open filed test. SPT, sucrose preference test. SIT, social interaction test.


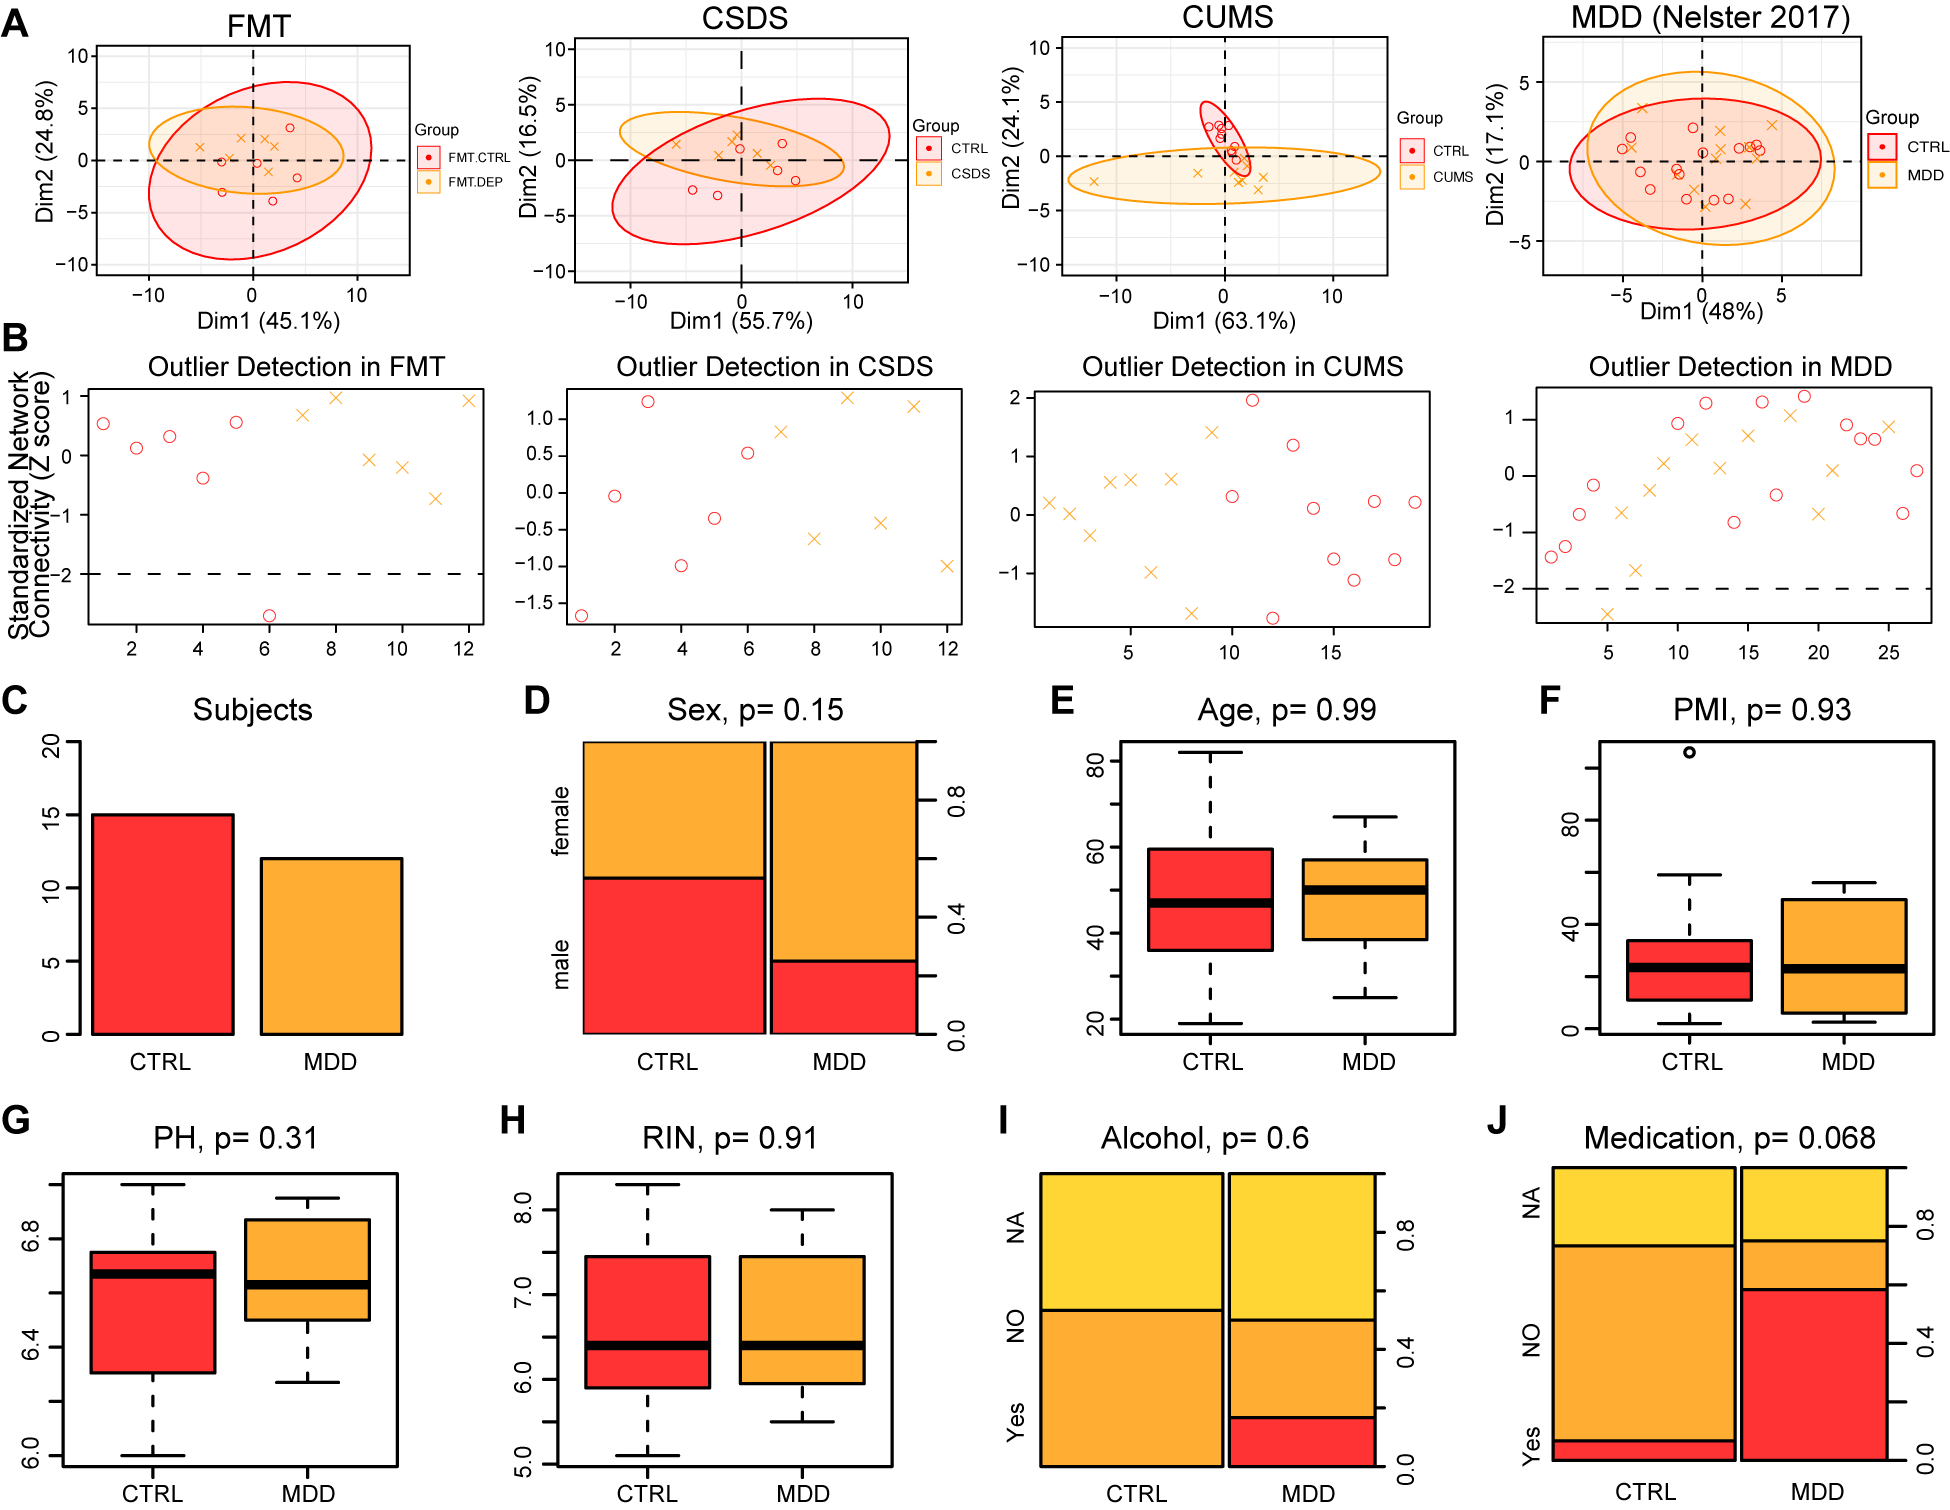


**Fig S2. Quality control of raw data.** (A) PCA scatter plots for sequence statistics of four data sets. The groups in each dataset did not differ significantly on the first two principal components, suggesting that sequencing technology statistics did not affect the results. (B) Sample network connectivity Z scores of each data set. Circles represent control group and crosses represent depressive group. (C-J) MDD dataset was balanced by available covariates and potential confounding factors. There was no significance in age, PMI, brain pH, RIN, alcohol and medication between CTRL and MDD. MDD, major depressive disorder. PMI, postmortem interval. RIN, RNA integrity.


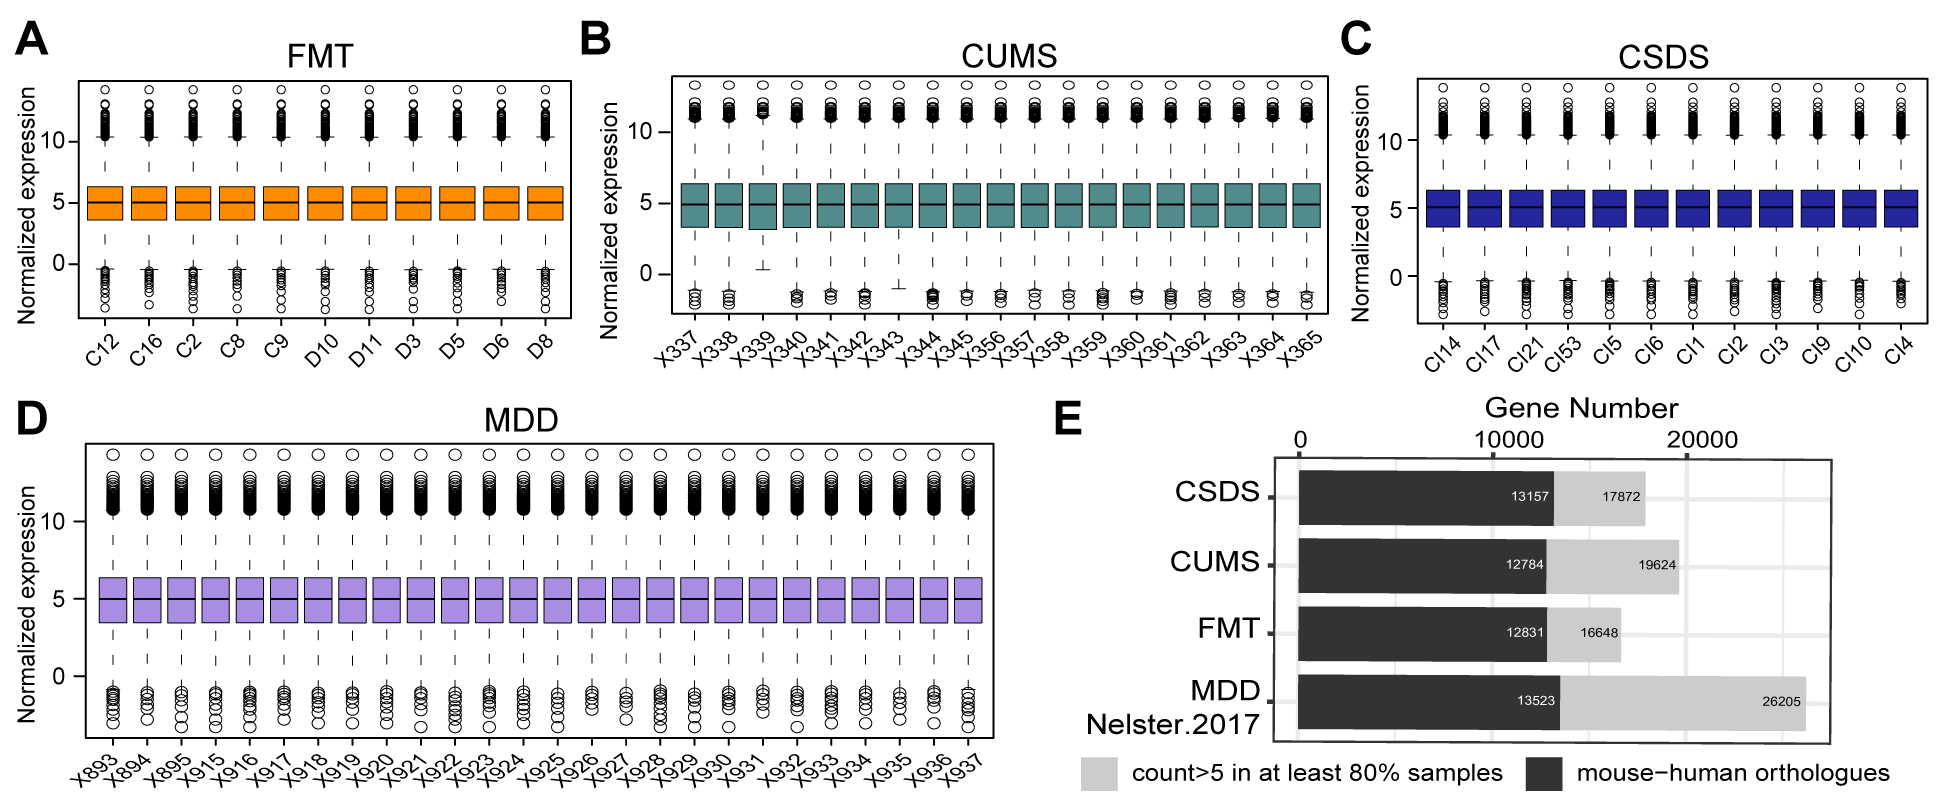


**Fig S3. Data summary.** (A-D) Normalized expression of four data sets. (E) The number of genes in each data set after filtering low–expressed genes and homologous transformation. CUMS, chronic unpredictable mild stress.


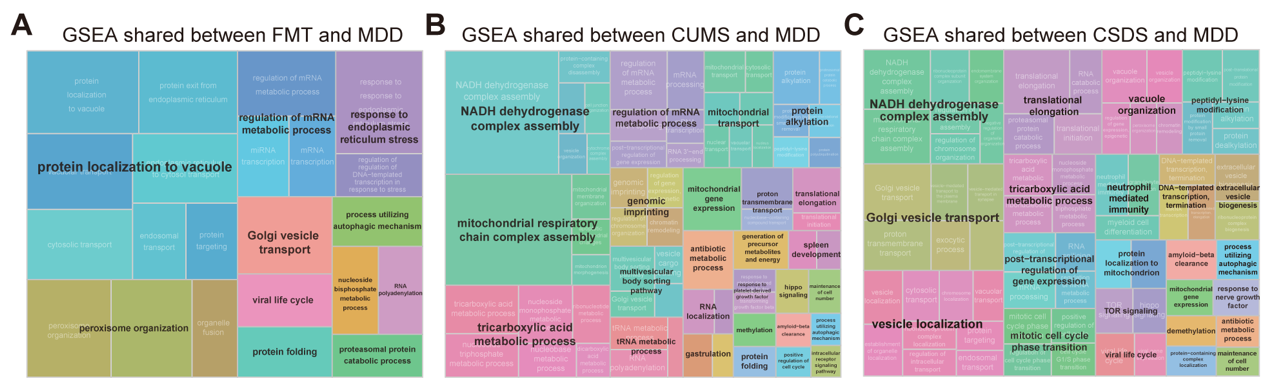


**Fig S4. Altered biological processes of in mouse models and MDD patients based on GSEA.** TreemapPlots show biological process clusters shared between mouse models and MDD patients. Similar color blocks represent biological processes that belong to the same cluster. The space of blocks represents the significance of GSEA analysis. GSEA, gene set enrichment analysis.


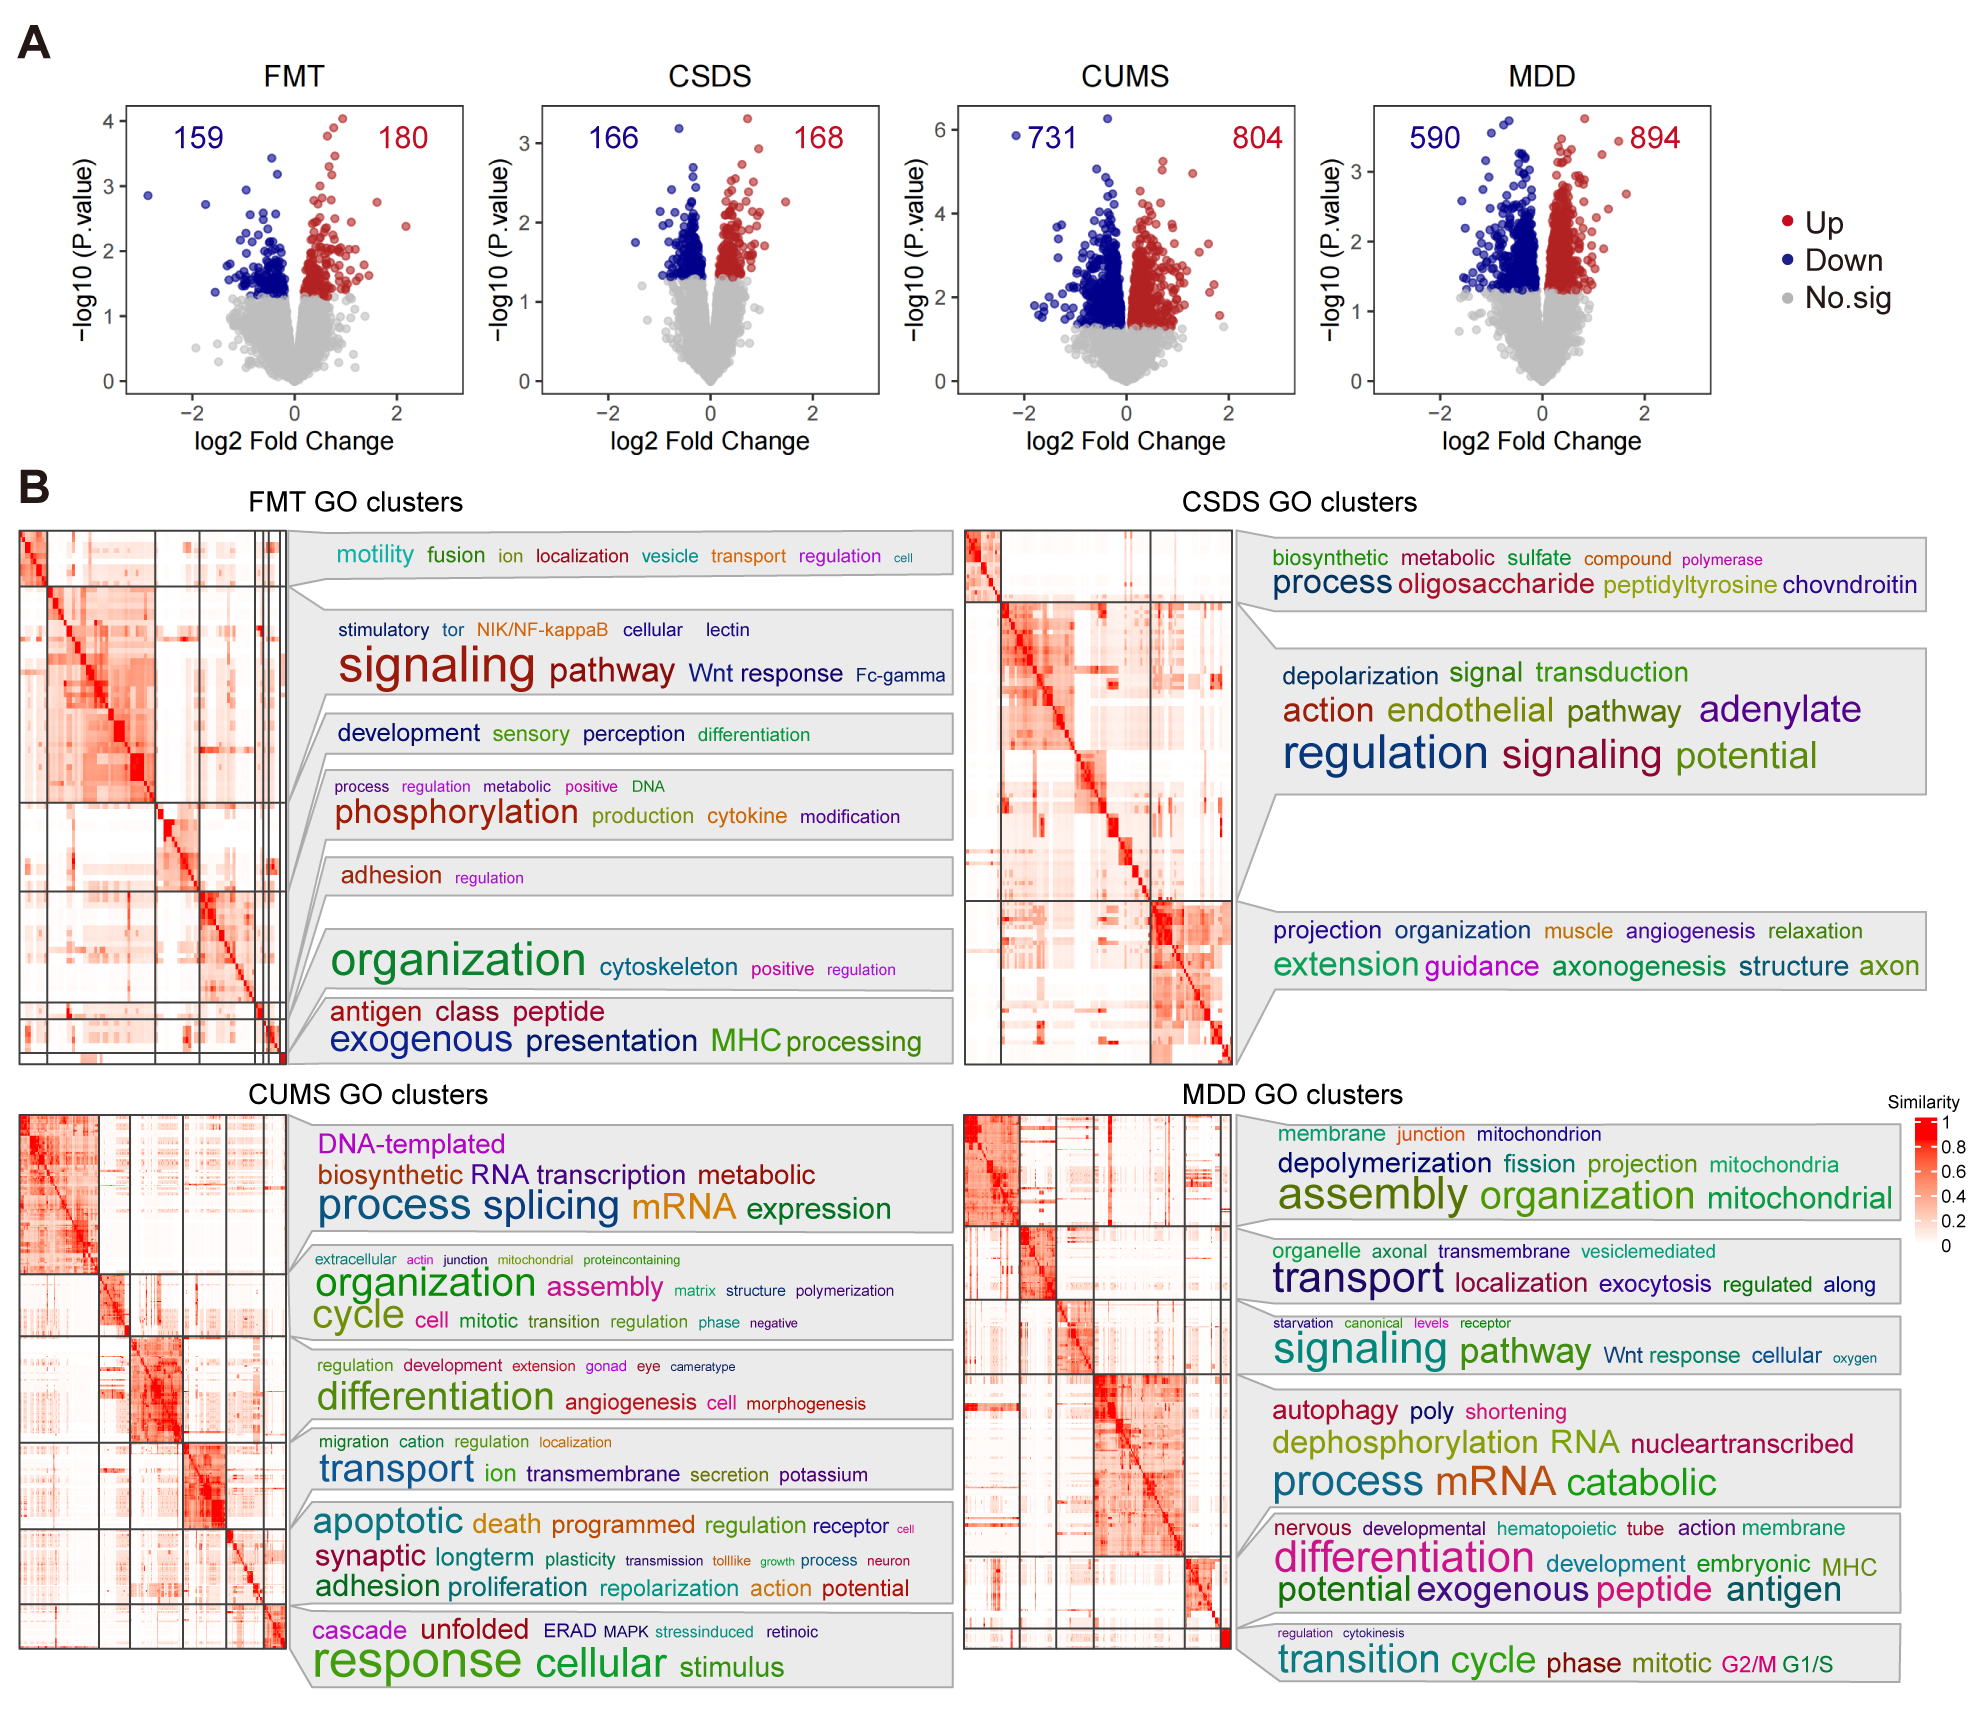


**Fig S5. Numbers and functions of DEGs for each dataset.** (A) Volcano plots show the DEGs in four datasets (*p* < 0.05). Red: up-regulation, blue: down-regulation, gray: no significance. (B) Heatmaps showed biological process clusters significantly enriched by DEGs of four data sets. Word cloud boxes at the right panel summarize the representative functions of each cluster. The size of words was adjusted based on their frequency, while the color of words was randomly assigned. DEG, differential expressed genes.


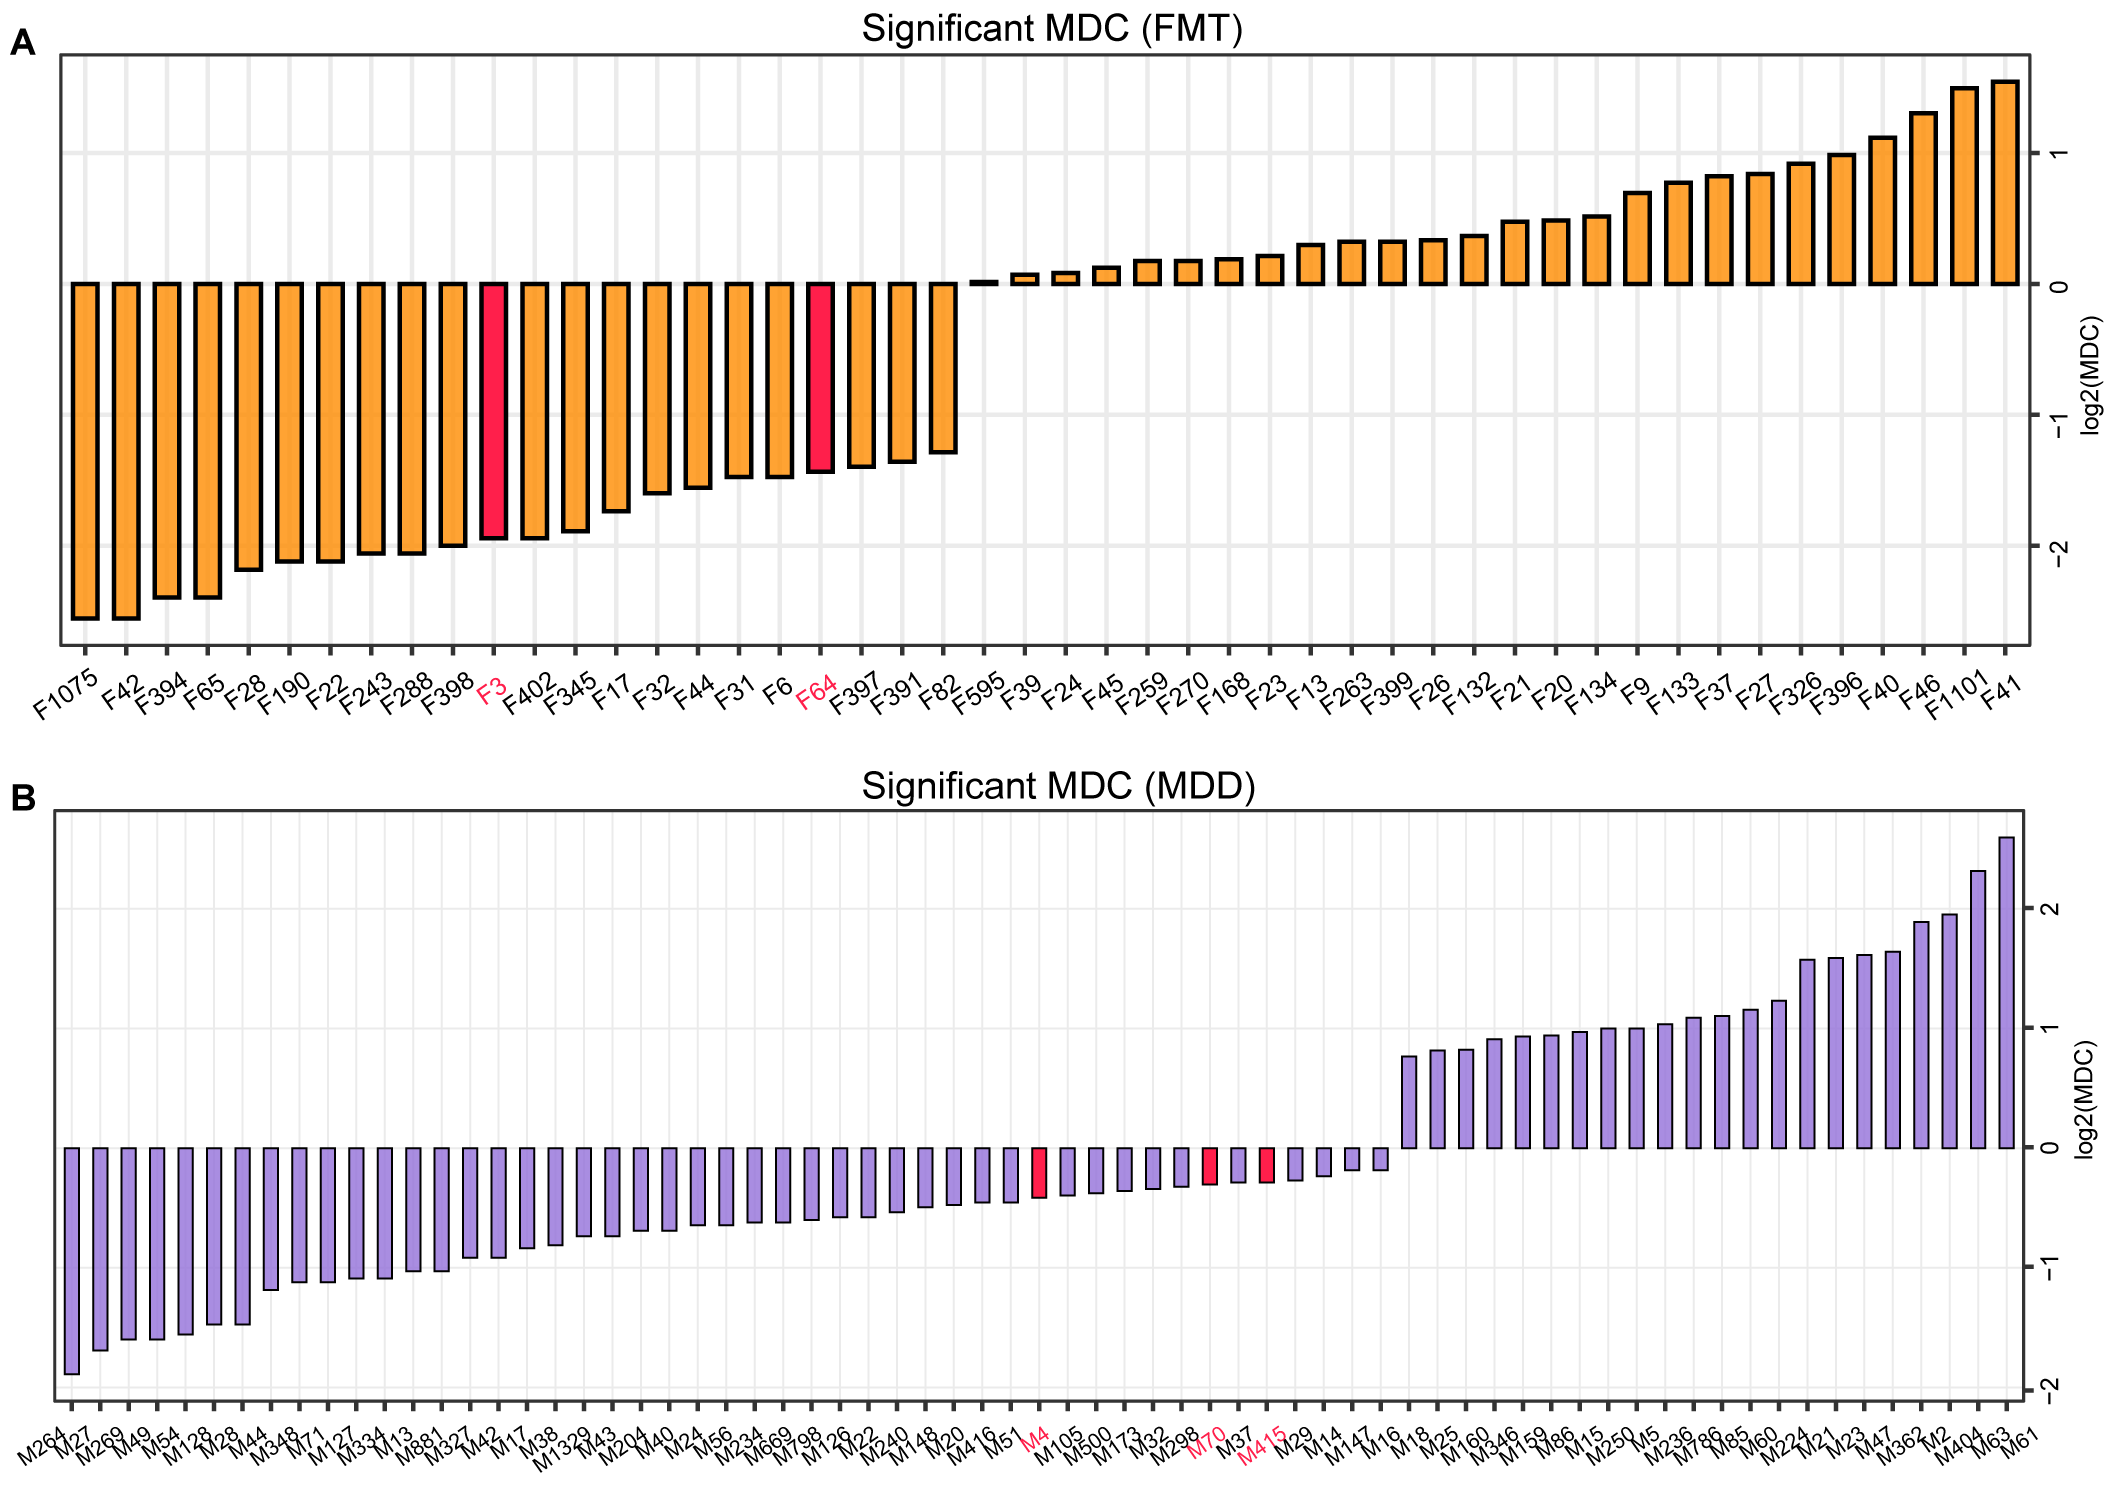


**Fig S6. Module different connectivity.** (A) FMT modules. (B) MDD modules. Among F3, M4 and their child modules, the modules with significantly altered intra- gene connectivity are marked in red.

**Table S1. Metadata of samples in public data set.**

**Table S2. List of biological processes identified by GSEA.**

**Table S3. Differentially expressed genes and their categories.**

**Table S4. Enrichment analysis results of DEGs based on biological processes, pathways, and cell types.**

**Table S5. Gene lists, results of DEG enrichment analysis and preservation analysis for each co-expressed gene module.**

**Table S6. Results of module different connectivity analysis.**

**Table S7. The primary functional subnets and outcomes of cell type enrichment for crucial modules.**
