# Supplementary material for: Systematical comparison reveals distinct brain transcriptomic features in models of depression induced by gut microbiota dysbiosis and chronic stress
Source: Research Square preprint supplement (doi:10.21203/rs.3.rs-4134877/v1), 2024-03-29
Supplement: Supplementary file 7 [file 8e99f04b82451db6b98f0161.xlsx]

## Sheet: sheet1
FMT.MDC_module_VS_CTRL_MDC_wFDR								MDD.MDC_module_VS_CTRL_MDC_wFDR
module	MDC	FDR	FDR_random_samples	FDR_random_genes				module	MDC	FDR	FDR_random_samples	FDR_random_genes
F2	0.69	1	1	1				M2	3.71	0	0	0
F3	0.26	0	0	0				M4	0.75	0	0	0
F5	0.98	1	1	1				M5	2	0	0	0
F6	0.36	0	0	0				M6	0.98	0.1	0	0.1
F7	0.52	0.34	0	0.34				M7	0.97	0.22	0	0.22
F9	1.62	0	0	0				M11	1.13	1	1	0.2
F10	0.57	0.78	0	0.78				M13	0.49	0	0	0
F12	0.57	0.88	0	0.88				M14	0.85	0	0	0
F13	1.23	0	0	0				M15	1.96	0	0	0
F17	0.3	0	0	0				M16	0.88	0	0	0
F18	0.59	0.98	0	0.98				M17	0.56	0	0	0
F19	0.87	1	1	1				M18	1.7	0	0	0
F20	1.4	0	0	0				M20	0.72	0.04	0	0.04
F21	1.39	0	0	0				M21	2.98	0	0	0
F22	0.23	0	0	0				M22	0.67	0	0	0
F23	1.16	0	0	0				M23	3.01	0	0	0
F24	1.06	0	0	0				M24	0.64	0	0	0
F25	0.83	1	1	1				M25	1.76	0	0	0
F26	1.26	0	0	0				M27	0.31	0	0	0
F27	1.79	0	0	0				M28	0.36	0	0	0
F28	0.22	0	0	0				M29	0.83	0	0	0
F31	0.36	0	0	0				M31	1.11	1	1	0.22
F32	0.33	0	0	0				M32	0.79	0	0	0
F33	0.8	1	1	1				M33	0.94	0.3	0	0.3
F34	0.77	1	1	0.98				M34	1.11	1	1	0.26
F37	1.77	0	0	0				M35	1.63	0.38	0.38	0.04
F39	1.05	0	0	0				M36	0.92	0.06	0	0.06
F40	2.17	0	0	0				M37	0.82	0.02	0	0.02
F41	2.92	0	0	0				M38	0.57	0	0	0
F42	0.17	0	0	0				M39	0.95	0.34	0	0.34
F43	1	1	1	1				M40	0.62	0	0	0
F44	0.34	0	0	0				M41	1.44	0.88	0.88	0
F45	1.09	0	0	0				M42	0.53	0	0	0
F46	2.47	0	0	0				M43	0.6	0	0	0
F64	0.37	0	0	0				M44	0.44	0	0	0
F65	0.19	0	0	0				M45	1.74	0.06	0.06	0
F66	0.9	1	1	1				M47	3.06	0	0	0
F81	0.45	0.2	0	0.2				M48	0.99	0.34	0	0.34
F82	0.41	0.04	0	0.04				M49	0.33	0	0	0
F102	0.83	1	1	1				M51	0.73	0	0	0
F103	0.66	1	1	0.92				M54	0.34	0	0	0
F105	0.7	1	1	0.94				M56	0.64	0.02	0	0.02
F107	0.64	1	1	0.9				M60	2.23	0	0	0
F109	0.93	1	1	1				M61	6.05	0	0	0
F132	1.29	0	0	0				M62	1.65	0.26	0.26	0
F133	1.71	0	0	0				M63	4.98	0	0	0
F134	1.43	0	0	0				M70	0.81	0	0	0
F150	0.72	1	1	0.98				M71	0.46	0	0	0
F155	0.61	0.78	0.36	0.78				M82	1.34	1	1	0.02
F156	0.99	1	1	1				M85	2.15	0	0	0
F159	0.53	0.44	0.02	0.44				M86	1.92	0	0	0
F168	1.14	0	0	0				M98	0.91	0.22	0	0.22
F169	0.94	1	1	1				M99	1.16	0.94	0.94	0.26
F190	0.23	0	0	0				M101	1.47	0.72	0.72	0
F194	0.58	0.94	0.94	0.64				M105	0.76	0	0	0
F195	0.78	1	1	1				M106	1.24	1	1	0.04
F196	0.69	1	0.88	1				M115	1.12	1	1	0.18
F197	0.85	1	1	1				M116	1.34	1	1	0
F198	0.84	1	1	0.98				M117	1.07	1	1	0.42
F203	0.77	0.98	0.98	0.92				M123	1.02	1	1	0.58
F232	0.79	1	1	1				M124	0.78	0.1	0	0.1
F243	0.24	0	0	0				M126	0.67	0	0	0
F259	1.13	0	0	0				M127	0.47	0	0	0
F263	1.25	0	0	0				M128	0.36	0	0	0
F270	1.13	0	0	0				M146	0.85	0.16	0	0.16
F273	0.6	0.98	0.98	0.58				M147	0.88	0.04	0	0.04
F288	0.24	0	0	0				M148	0.71	0	0	0
F326	1.89	0	0	0				M159	1.91	0	0	0
F345	0.27	0	0	0				M160	1.77	0	0	0
F347	0.92	1	1	1				M172	1.24	1	1	0.14
F388	0.93	1	1	1				M173	0.78	0	0	0
F389	0.55	0.7	0	0.7				M174	1.02	1	1	0.64
F391	0.39	0	0	0				M176	0.86	0.12	0	0.12
F392	0.73	1	1	0.98				M177	1.11	1	1	0.32
F394	0.19	0	0	0				M178	1.42	0.68	0.68	0.06
F396	1.98	0	0	0				M204	0.62	0	0	0
F397	0.38	0.02	0	0.02				M216	1.63	0.06	0.06	0
F398	0.25	0	0	0				M224	2.35	0	0	0
F399	1.25	0	0	0				M234	0.65	0	0	0
F400	0.48	0.2	0	0.2				M235	1.09	1	1	0.28
F402	0.26	0	0	0				M236	2.05	0	0	0
F533	0.9	1	1	1				M240	0.69	0	0	0
F535	0.65	1	1	0.72				M241	0.82	0.08	0	0.08
F595	1.01	0	0	0				M250	2	0	0	0
F660	0.64	0.88	0.72	0.88				M251	1.49	0.72	0.72	0.02
F718	0.75	1	1	1				M253	1.36	0.88	0.88	0.12
F719	0.87	1	1	1				M264	0.27	0	0	0
F797	0.64	0.9	0.9	0.84				M269	0.33	0	0	0
F1035	0.88	1	1	1				M282	1.03	1	1	0.4
F1040	0.57	0.74	0.14	0.74				M293	0.84	0.08	0	0.08
F1041	0.81	1	1	1				M295	1.36	0.78	0.78	0
F1075	0.17	0	0	0				M297	1.09	1	1	0.28
F1101	2.82	0	0	0				M298	0.8	0.04	0	0.04
F1479	0.65	0.96	0.76	0.96				M302	1.34	0.84	0.84	0.12
								M308	0.86	0.12	0	0.12
								M310	1.09	1	1	0.44
								M314	1.11	1	1	0.38
								M318	1.28	0.98	0.98	0.12
								M319	0.89	0.06	0	0.06
								M320	0.98	0.36	0	0.36
								M327	0.53	0	0	0
								M334	0.47	0	0	0
								M346	1.88	0.04	0.04	0
								M347	1.02	1	1	0.64
								M348	0.46	0	0	0
								M362	3.12	0	0	0
								M374	0.98	0.24	0	0.24
								M404	3.87	0	0	0
								M415	0.82	0.02	0	0.02
								M416	0.73	0	0	0
								M438	1.26	0.98	0.98	0.12
								M446	1.34	0.94	0.94	0.06
								M479	0.99	0.38	0	0.38
								M500	0.77	0.04	0	0.04
								M504	1.05	1	1	0.46
								M610	0.89	0.2	0	0.2
								M631	1.65	0.22	0.22	0
								M668	1.75	0.14	0.14	0
								M669	0.65	0	0	0
								M771	1.6	0.44	0.44	0
								M772	1.42	0.74	0.74	0.02
								M786	2.13	0	0	0
								M798	0.66	0	0	0
								M881	0.49	0	0	0
								M913	1.07	1	1	0.42
								M915	0.75	0.06	0	0.06
								M944	1.09	1	1	0.52
								M1106	0.94	0.4	0	0.4
								M1133	1.17	1	1	0.28
								M1247	0.91	0.26	0	0.26
								M1259	1.63	0.38	0.38	0.02
								M1316	1.52	0.54	0.54	0.02
								M1329	0.6	0	0	0
