# Supplementary material for: Systematical comparison reveals distinct brain transcriptomic features in models of depression induced by gut microbiota dysbiosis and chronic stress
Source: Research Square preprint supplement (doi:10.21203/rs.3.rs-4134877/v1), 2024-03-29
Supplement: Supplementary file 8 [file bd2638ca0a7597e21fd2fa12.xlsx]

## Sheet: GeneList.of.each.module
FMT.network			CSDS.network			CUMS.network			MDD.network
Gene.id	Gene.symbol	Module	Gene.id	Gene.symbol	Module	Gene.id	Gene.symbol	Module	Gene.id	Gene.symbol	Module
ENSG00000000419	DPM1	F2	ENSG00000000003	TSPAN6	S2	ENSG00000001561	ENPP4	U2	ENSG00000000003	TSPAN6	M2
ENSG00000000457	SCYL3	F2	ENSG00000000457	SCYL3	S2	ENSG00000001629	ANKIB1	U2	ENSG00000002587	HS3ST1	M2
ENSG00000000460	C1orf112	F2	ENSG00000000460	C1orf112	S2	ENSG00000006042	TMEM98	U2	ENSG00000002745	WNT16	M2
ENSG00000001036	FUCA2	F2	ENSG00000001036	FUCA2	S2	ENSG00000007062	PROM1	U2	ENSG00000004534	RBM6	M2
ENSG00000001084	GCLC	F2	ENSG00000001084	GCLC	S2	ENSG00000008277	ADAM22	U2	ENSG00000004776	HSPB6	M2
ENSG00000001167	NFYA	F2	ENSG00000001167	NFYA	S2	ENSG00000010278	CD9	U2	ENSG00000004838	ZMYND10	M2
ENSG00000001497	LAS1L	F2	ENSG00000001461	NIPAL3	S2	ENSG00000010810	FYN	U2	ENSG00000005187	ACSM3	M2
ENSG00000001629	ANKIB1	F2	ENSG00000001561	ENPP4	S2	ENSG00000011426	ANLN	U2	ENSG00000005448	WDR54	M2
ENSG00000001630	CYP51A1	F2	ENSG00000001629	ANKIB1	S2	ENSG00000011523	CEP68	U2	ENSG00000006468	ETV1	M2
ENSG00000001631	KRIT1	F2	ENSG00000001630	CYP51A1	S2	ENSG00000013297	CLDN11	U2	ENSG00000007062	PROM1	M2
ENSG00000002016	RAD52	F2	ENSG00000001631	KRIT1	S2	ENSG00000015592	STMN4	U2	ENSG00000007174	DNAH9	M2
ENSG00000002330	BAD	F2	ENSG00000002016	RAD52	S2	ENSG00000016391	CHDH	U2	ENSG00000007202	BLTP2	M2
ENSG00000002549	LAP3	F2	ENSG00000002549	LAP3	S2	ENSG00000017427	IGF1	U2	ENSG00000008226	DLEC1	M2
ENSG00000002745	WNT16	F2	ENSG00000002745	WNT16	S2	ENSG00000019144	PHLDB1	U2	ENSG00000010310	GIPR	M2
ENSG00000002746	HECW1	F2	ENSG00000002746	HECW1	S2	ENSG00000021300	PLEKHB1	U2	ENSG00000010626	LRRC23	M2
ENSG00000002834	LASP1	F2	ENSG00000002834	LASP1	S2	ENSG00000036257	CUL3	U2	ENSG00000014216	CAPN1	M2
ENSG00000002919	SNX11	F2	ENSG00000002919	SNX11	S2	ENSG00000036530	CYP46A1	U2	ENSG00000015133	CCDC88C	M2
ENSG00000003056	M6PR	F2	ENSG00000002933	TMEM176A	S2	ENSG00000037637	FBXO42	U2	ENSG00000020922	MRE11	M2
ENSG00000003096	KLHL13	F2	ENSG00000003056	M6PR	S2	ENSG00000047365	ARAP2	U2	ENSG00000025708	TYMP	M2
ENSG00000003147	ICA1	F2	ENSG00000003096	KLHL13	S2	ENSG00000048052	HDAC9	U2	ENSG00000027001	MIPEP	M2
ENSG00000003249	DBNDD1	F2	ENSG00000003249	DBNDD1	S2	ENSG00000050344	NFE2L3	U2	ENSG00000032389	EIPR1	M2
ENSG00000003402	CFLAR	F2	ENSG00000003393	ALS2	S2	ENSG00000053254	FOXN3	U2	ENSG00000034239	CLXN	M2
ENSG00000003509	NDUFAF7	F2	ENSG00000003402	CFLAR	S2	ENSG00000054690	PLEKHH1	U2	ENSG00000039139	DNAH5	M2
ENSG00000003756	RBM5	F2	ENSG00000003756	RBM5	S2	ENSG00000057704	TMCC3	U2	ENSG00000046604	DSG2	M2
ENSG00000003987	MTMR7	F2	ENSG00000003987	MTMR7	S2	ENSG00000058085	LAMC2	U2	ENSG00000047457	CP	M2
ENSG00000003989	SLC7A2	F2	ENSG00000003989	SLC7A2	S2	ENSG00000061918	GUCY1B1	U2	ENSG00000047578	KATNIP	M2
ENSG00000004059	ARF5	F2	ENSG00000004139	SARM1	S2	ENSG00000064651	SLC12A2	U2	ENSG00000052850	ALX4	M2
ENSG00000004139	SARM1	F2	ENSG00000004142	POLDIP2	S2	ENSG00000064787	BCAS1	U2	ENSG00000053372	MRTO4	M2
ENSG00000004142	POLDIP2	F2	ENSG00000004487	KDM1A	S2	ENSG00000065361	ERBB3	U2	ENSG00000054179	ENTPD2	M2
ENSG00000004455	AK2	F2	ENSG00000004534	RBM6	S2	ENSG00000065911	MTHFD2	U2	ENSG00000054654	SYNE2	M2
ENSG00000004468	CD38	F2	ENSG00000004660	CAMKK1	S2	ENSG00000066135	KDM4A	U2	ENSG00000057019	DCBLD2	M2
ENSG00000004478	FKBP4	F2	ENSG00000004700	RECQL	S2	ENSG00000066279	ASPM	U2	ENSG00000058453	CROCC	M2
ENSG00000004534	RBM6	F2	ENSG00000004766	VPS50	S2	ENSG00000066455	GOLGA5	U2	ENSG00000064012	CASP8	M2
ENSG00000004700	RECQL	F2	ENSG00000004776	HSPB6	S2	ENSG00000068028	RASSF1	U2	ENSG00000064199	SPA17	M2
ENSG00000004766	VPS50	F2	ENSG00000004799	PDK4	S2	ENSG00000068079	IFI35	U2	ENSG00000064995	TAF11	M2
ENSG00000004776	HSPB6	F2	ENSG00000004838	ZMYND10	S2	ENSG00000071054	MAP4K4	U2	ENSG00000066032	CTNNA2	M2
ENSG00000004799	PDK4	F2	ENSG00000004866	ST7	S2	ENSG00000071462	BUD23	U2	ENSG00000066697	MSANTD3	M2
ENSG00000004838	ZMYND10	F2	ENSG00000004897	CDC27	S2	ENSG00000071564	TCF3	U2	ENSG00000075131	TIPIN	M2
ENSG00000004848	ARX	F2	ENSG00000004961	HCCS	S2	ENSG00000072134	EPN2	U2	ENSG00000075275	CELSR1	M2
ENSG00000004961	HCCS	F2	ENSG00000005059	MCUB	S2	ENSG00000072518	MARK2	U2	ENSG00000075702	WDR62	M2
ENSG00000005007	UPF1	F2	ENSG00000005100	DHX33	S2	ENSG00000072571	HMMR	U2	ENSG00000077157	PPP1R12B	M2
ENSG00000005020	SKAP2	F2	ENSG00000005108	THSD7A	S2	ENSG00000072864	NDE1	U2	ENSG00000077235	GTF3C1	M2
ENSG00000005022	SLC25A5	F2	ENSG00000005156	LIG3	S2	ENSG00000073417	PDE8A	U2	ENSG00000082175	PGR	M2
ENSG00000005059	MCUB	F2	ENSG00000005175	RPAP3	S2	ENSG00000079805	DNM2	U2	ENSG00000084693	AGBL5	M2
ENSG00000005100	DHX33	F2	ENSG00000005187	ACSM3	S2	ENSG00000080819	CPOX	U2	ENSG00000085662	AKR1B1	M2
ENSG00000005175	RPAP3	F2	ENSG00000005194	CIAPIN1	S2	ENSG00000081189	MEF2C	U2	ENSG00000087903	RFX2	M2
ENSG00000005187	ACSM3	F2	ENSG00000005206	SPPL2B	S2	ENSG00000082458	DLG3	U2	ENSG00000088727	KIF9	M2
ENSG00000005189	REXO5	F2	ENSG00000005249	PRKAR2B	S2	ENSG00000082996	RNF13	U2	ENSG00000089091	DZANK1	M2
ENSG00000005194	CIAPIN1	F2	ENSG00000005302	MSL3	S2	ENSG00000083444	PLOD1	U2	ENSG00000089101	CFAP61	M2
ENSG00000005206	SPPL2B	F2	ENSG00000005379	TSPOAP1	S2	ENSG00000083720	OXCT1	U2	ENSG00000089163	SIRT4	M2
ENSG00000005238	ATOSB	F2	ENSG00000005448	WDR54	S2	ENSG00000084628	NKAIN1	U2	ENSG00000090273	NUDC	M2
ENSG00000005243	COPZ2	F2	ENSG00000005471	ABCB4	S2	ENSG00000085117	CD82	U2	ENSG00000090889	KIF4A	M2
ENSG00000005249	PRKAR2B	F2	ENSG00000005483	KMT2E	S2	ENSG00000085832	EPS15	U2	ENSG00000091879	ANGPT2	M2
ENSG00000005302	MSL3	F2	ENSG00000005486	RHBDD2	S2	ENSG00000086544	ITPKC	U2	ENSG00000091947	TMEM101	M2
ENSG00000005339	CREBBP	F2	ENSG00000005700	IBTK	S2	ENSG00000087053	MTMR2	U2	ENSG00000096093	EFHC1	M2
ENSG00000005436	GCFC2	F2	ENSG00000005810	MYCBP2	S2	ENSG00000087266	SH3BP2	U2	ENSG00000099956	SMARCB1	M2
ENSG00000005448	WDR54	F2	ENSG00000005812	FBXL3	S2	ENSG00000087301	TXNDC16	U2	ENSG00000099999	RNF215	M2
ENSG00000005469	CROT	F2	ENSG00000005884	ITGA3	S2	ENSG00000087470	DNM1L	U2	ENSG00000100034	PPM1F	M2
ENSG00000005471	ABCB4	F2	ENSG00000005893	LAMP2	S2	ENSG00000087586	AURKA	U2	ENSG00000100211	CBY1	M2
ENSG00000005483	KMT2E	F2	ENSG00000006071	ABCC8	S2	ENSG00000088325	TPX2	U2	ENSG00000100280	AP1B1	M2
ENSG00000005486	RHBDD2	F2	ENSG00000006118	TMEM132A	S2	ENSG00000088970	KIZ	U2	ENSG00000100360	IFT27	M2
ENSG00000005810	MYCBP2	F2	ENSG00000006125	AP2B1	S2	ENSG00000091513	TF	U2	ENSG00000100577	GSTZ1	M2
ENSG00000005882	PDK2	F2	ENSG00000006128	TAC1	S2	ENSG00000092201	SUPT16H	U2	ENSG00000100629	CEP128	M2
ENSG00000005884	ITGA3	F2	ENSG00000006451	RALA	S2	ENSG00000099260	PALMD	U2	ENSG00000100650	SRSF5	M2
ENSG00000005961	ITGA2B	F2	ENSG00000006453	BAIAP2L1	S2	ENSG00000099282	TSPAN15	U2	ENSG00000100678	SLC8A3	M2
ENSG00000006015	REX1BD	F2	ENSG00000006459	KDM7A	S2	ENSG00000099840	IZUMO4	U2	ENSG00000100796	PPP4R3A	M2
ENSG00000006025	OSBPL7	F2	ENSG00000006468	ETV1	S2	ENSG00000100029	PES1	U2	ENSG00000101222	SPEF1	M2
ENSG00000006047	YBX2	F2	ENSG00000006576	PHTF2	S2	ENSG00000100146	SOX10	U2	ENSG00000102001	CACNA1F	M2
ENSG00000006071	ABCC8	F2	ENSG00000006607	FARP2	S2	ENSG00000100147	CCDC134	U2	ENSG00000102543	CDADC1	M2
ENSG00000006118	TMEM132A	F2	ENSG00000006634	DBF4	S2	ENSG00000100592	DAAM1	U2	ENSG00000103018	CYB5B	M2
ENSG00000006128	TAC1	F2	ENSG00000006652	IFRD1	S2	ENSG00000100604	CHGA	U2	ENSG00000103021	CCDC113	M2
ENSG00000006210	CX3CL1	F2	ENSG00000006704	GTF2IRD1	S2	ENSG00000100884	CPNE6	U2	ENSG00000103494	RPGRIP1L	M2
ENSG00000006377	DLX6	F2	ENSG00000006715	VPS41	S2	ENSG00000101049	SGK2	U2	ENSG00000103549	RNF40	M2
ENSG00000006432	MAP3K9	F2	ENSG00000006740	ARHGAP44	S2	ENSG00000101160	CTSZ	U2	ENSG00000104218	CSPP1	M2
ENSG00000006453	BAIAP2L1	F2	ENSG00000006744	ELAC2	S2	ENSG00000101161	PRPF6	U2	ENSG00000104450	SPAG1	M2
ENSG00000006530	AGK	F2	ENSG00000006837	CDKL3	S2	ENSG00000101665	SMAD7	U2	ENSG00000104497	SNX16	M2
ENSG00000006534	ALDH3B1	F2	ENSG00000007001	UPP2	S2	ENSG00000101670	LIPG	U2	ENSG00000104522	GFUS	M2
ENSG00000006576	PHTF2	F2	ENSG00000007168	PAFAH1B1	S2	ENSG00000102030	NAA10	U2	ENSG00000105048	TNNT1	M2
ENSG00000006625	GGCT	F2	ENSG00000007174	DNAH9	S2	ENSG00000102743	SLC25A15	U2	ENSG00000105409	ATP1A3	M2
ENSG00000006634	DBF4	F2	ENSG00000007202	BLTP2	S2	ENSG00000102967	DHODH	U2	ENSG00000105792	CFAP69	M2
ENSG00000006652	IFRD1	F2	ENSG00000007237	GAS7	S2	ENSG00000103089	FA2H	U2	ENSG00000105948	TTC26	M2
ENSG00000006695	COX10	F2	ENSG00000007341	ST7L	S2	ENSG00000103184	SEC14L5	U2	ENSG00000105982	RNF32	M2
ENSG00000006704	GTF2IRD1	F2	ENSG00000007392	LUC7L	S2	ENSG00000103540	CCP110	U2	ENSG00000106348	IMPDH1	M2
ENSG00000006712	PAF1	F2	ENSG00000007516	BAIAP3	S2	ENSG00000104419	NDRG1	U2	ENSG00000106392	C1GALT1	M2
ENSG00000006740	ARHGAP44	F2	ENSG00000007541	PIGQ	S2	ENSG00000104529	EEF1D	U2	ENSG00000106683	LIMK1	M2
ENSG00000006744	ELAC2	F2	ENSG00000007545	CRAMP1	S2	ENSG00000105135	ILVBL	U2	ENSG00000106823	ECM2	M2
ENSG00000006831	ADIPOR2	F2	ENSG00000007923	DNAJC11	S2	ENSG00000105662	CRTC1	U2	ENSG00000106992	AK1	M2
ENSG00000006837	CDKL3	F2	ENSG00000007944	MYLIP	S2	ENSG00000105695	MAG	U2	ENSG00000107186	MPDZ	M2
ENSG00000007001	UPP2	F2	ENSG00000008018	PSMB1	S2	ENSG00000105968	H2AZ2	U2	ENSG00000107249	GLIS3	M2
ENSG00000007047	MARK4	F2	ENSG00000008056	SYN1	S2	ENSG00000106462	EZH2	U2	ENSG00000107611	CUBN	M2
ENSG00000007062	PROM1	F2	ENSG00000008083	JARID2	S2	ENSG00000106538	RARRES2	U2	ENSG00000107614	TRDMT1	M2
ENSG00000007080	CCDC124	F2	ENSG00000008086	CDKL5	S2	ENSG00000107331	ABCA2	U2	ENSG00000108176	DNAJC12	M2
ENSG00000007255	TRAPPC6A	F2	ENSG00000008130	NADK	S2	ENSG00000107362	ABHD17B	U2	ENSG00000108379	WNT3	M2
ENSG00000007264	MATK	F2	ENSG00000008256	CYTH3	S2	ENSG00000107672	NSMCE4A	U2	ENSG00000109103	UNC119	M2
ENSG00000007372	PAX6	F2	ENSG00000008277	ADAM22	S2	ENSG00000107679	PLEKHA1	U2	ENSG00000109610	SOD3	M2
ENSG00000007376	RPUSD1	F2	ENSG00000008282	SYPL1	S2	ENSG00000107731	UNC5B	U2	ENSG00000110076	NRXN2	M2
ENSG00000007384	RHBDF1	F2	ENSG00000008283	CYB561	S2	ENSG00000108379	WNT3	U2	ENSG00000110723	EXPH5	M2
ENSG00000007392	LUC7L	F2	ENSG00000008294	SPAG9	S2	ENSG00000108381	ASPA	U2	ENSG00000110925	CSRNP2	M2
ENSG00000007520	TSR3	F2	ENSG00000008405	CRY1	S2	ENSG00000108669	CYTH1	U2	ENSG00000111834	RSPH4A	M2
ENSG00000007541	PIGQ	F2	ENSG00000008441	NFIX	S2	ENSG00000109381	ELF2	U2	ENSG00000112033	PPARD	M2
ENSG00000007866	TEAD3	F2	ENSG00000008513	ST3GAL1	S2	ENSG00000109458	GAB1	U2	ENSG00000112319	EYA4	M2
ENSG00000007923	DNAJC11	F2	ENSG00000008735	MAPK8IP2	S2	ENSG00000109534	GAR1	U2	ENSG00000112419	PHACTR2	M2
ENSG00000008018	PSMB1	F2	ENSG00000008853	RHOBTB2	S2	ENSG00000109846	CRYAB	U2	ENSG00000112530	PACRG	M2
ENSG00000008056	SYN1	F2	ENSG00000008869	HEATR5B	S2	ENSG00000110422	HIPK3	U2	ENSG00000112739	PRPF4B	M2
ENSG00000008283	CYB561	F2	ENSG00000008952	SEC62	S2	ENSG00000110801	PSMD9	U2	ENSG00000113141	IK	M2
ENSG00000008294	SPAG9	F2	ENSG00000008988	RPS20	S2	ENSG00000111110	PPM1H	U2	ENSG00000114446	IFT57	M2
ENSG00000008311	AASS	F2	ENSG00000009307	CSDE1	S2	ENSG00000111231	GPN3	U2	ENSG00000114473	IQCG	M2
ENSG00000008324	SS18L2	F2	ENSG00000009335	UBE3C	S2	ENSG00000111321	LTBR	U2	ENSG00000114631	PODXL2	M2
ENSG00000008382	MPND	F2	ENSG00000009413	REV3L	S2	ENSG00000111450	STX2	U2	ENSG00000114654	EFCC1	M2
ENSG00000008394	MGST1	F2	ENSG00000009694	TENM1	S2	ENSG00000111962	UST	U2	ENSG00000114670	NEK11	M2
ENSG00000008405	CRY1	F2	ENSG00000009724	MASP2	S2	ENSG00000112039	FANCE	U2	ENSG00000114841	DNAH1	M2
ENSG00000008735	MAPK8IP2	F2	ENSG00000009780	FAM76A	S2	ENSG00000112531	QKI	U2	ENSG00000115159	GPD2	M2
ENSG00000008838	MED24	F2	ENSG00000009790	TRAF3IP3	S2	ENSG00000112561	TFEB	U2	ENSG00000115241	PPM1G	M2
ENSG00000008853	RHOBTB2	F2	ENSG00000009830	POMT2	S2	ENSG00000113296	THBS4	U2	ENSG00000115266	APC2	M2
ENSG00000008952	SEC62	F2	ENSG00000009844	VTA1	S2	ENSG00000113369	ARRDC3	U2	ENSG00000115339	GALNT3	M2
ENSG00000008988	RPS20	F2	ENSG00000009954	BAZ1B	S2	ENSG00000113494	PRLR	U2	ENSG00000115350	POLE4	M2
ENSG00000009307	CSDE1	F2	ENSG00000010017	RANBP9	S2	ENSG00000113645	WWC1	U2	ENSG00000115423	DNAH6	M2
ENSG00000009335	UBE3C	F2	ENSG00000010072	SPRTN	S2	ENSG00000114541	FRMD4B	U2	ENSG00000115677	HDLBP	M2
ENSG00000009413	REV3L	F2	ENSG00000010244	ZNF207	S2	ENSG00000114861	FOXP1	U2	ENSG00000116874	WARS2	M2
ENSG00000009724	MASP2	F2	ENSG00000010256	UQCRC1	S2	ENSG00000115290	GRB14	U2	ENSG00000116885	OSCP1	M2
ENSG00000009780	FAM76A	F2	ENSG00000010270	STARD3NL	S2	ENSG00000115423	DNAH6	U2	ENSG00000117461	PIK3R3	M2
ENSG00000009830	POMT2	F2	ENSG00000010282	HHATL	S2	ENSG00000115459	ELMOD3	U2	ENSG00000117477	CCDC181	M2
ENSG00000009844	VTA1	F2	ENSG00000010310	GIPR	S2	ENSG00000115507	OTX1	U2	ENSG00000117595	IRF6	M2
ENSG00000009950	MLXIPL	F2	ENSG00000010319	SEMA3G	S2	ENSG00000116473	RAP1A	U2	ENSG00000117640	MTFR1L	M2
ENSG00000010017	RANBP9	F2	ENSG00000010322	NISCH	S2	ENSG00000116514	RNF19B	U2	ENSG00000118096	IFT46	M2
ENSG00000010072	SPRTN	F2	ENSG00000010404	IDS	S2	ENSG00000116903	EXOC8	U2	ENSG00000118307	DNAI7	M2
ENSG00000010244	ZNF207	F2	ENSG00000011007	ELOA	S2	ENSG00000117115	PADI2	U2	ENSG00000118420	UBE3D	M2
ENSG00000010256	UQCRC1	F2	ENSG00000011021	CLCN6	S2	ENSG00000117707	PROX1	U2	ENSG00000118690	ARMC2	M2
ENSG00000010270	STARD3NL	F2	ENSG00000011028	MRC2	S2	ENSG00000118298	CA14	U2	ENSG00000118965	WDR35	M2
ENSG00000010282	HHATL	F2	ENSG00000011083	SLC6A7	S2	ENSG00000118307	DNAI7	U2	ENSG00000119392	GLE1	M2
ENSG00000010295	IFFO1	F2	ENSG00000011105	TSPAN9	S2	ENSG00000118322	ATP10B	U2	ENSG00000119636	BBOF1	M2
ENSG00000010310	GIPR	F2	ENSG00000011114	BTBD7	S2	ENSG00000119139	TJP2	U2	ENSG00000119703	ZC2HC1C	M2
ENSG00000010318	PHF7	F2	ENSG00000011143	MKS1	S2	ENSG00000119326	CTNNAL1	U2	ENSG00000120137	PANK3	M2
ENSG00000010322	NISCH	F2	ENSG00000011258	MBTD1	S2	ENSG00000120088	CRHR1	U2	ENSG00000120733	KDM3B	M2
ENSG00000010327	STAB1	F2	ENSG00000011275	RNF216	S2	ENSG00000120162	MOB3B	U2	ENSG00000121621	KIF18A	M2
ENSG00000010361	FUZ	F2	ENSG00000011295	TTC19	S2	ENSG00000120756	PLS1	U2	ENSG00000121769	FABP3	M2
ENSG00000010379	SLC6A13	F2	ENSG00000011304	PTBP1	S2	ENSG00000120913	PDLIM2	U2	ENSG00000122735	DNAI1	M2
ENSG00000010404	IDS	F2	ENSG00000011347	SYT7	S2	ENSG00000122435	TRMT13	U2	ENSG00000122741	DCAF10	M2
ENSG00000010671	BTK	F2	ENSG00000011376	LARS2	S2	ENSG00000123080	CDKN2C	U2	ENSG00000122970	IFT81	M2
ENSG00000010704	HFE	F2	ENSG00000011405	PIK3C2A	S2	ENSG00000123091	RNF11	U2	ENSG00000124074	ENKD1	M2
ENSG00000010803	SCMH1	F2	ENSG00000011454	RABGAP1	S2	ENSG00000123560	PLP1	U2	ENSG00000124120	TTPAL	M2
ENSG00000010818	HIVEP2	F2	ENSG00000011465	DCN	S2	ENSG00000123610	TNFAIP6	U2	ENSG00000124171	PARD6B	M2
ENSG00000011009	LYPLA2	F2	ENSG00000011478	QPCTL	S2	ENSG00000123643	SLC36A1	U2	ENSG00000124789	NUP153	M2
ENSG00000011028	MRC2	F2	ENSG00000011523	CEP68	S2	ENSG00000124920	MYRF	U2	ENSG00000125779	PANK2	M2
ENSG00000011105	TSPAN9	F2	ENSG00000011566	MAP4K3	S2	ENSG00000125457	MIF4GD	U2	ENSG00000127329	PTPRB	M2
ENSG00000011114	BTBD7	F2	ENSG00000011677	GABRA3	S2	ENSG00000125648	SLC25A23	U2	ENSG00000128346	C22orf23	M2
ENSG00000011132	APBA3	F2	ENSG00000012048	BRCA1	S2	ENSG00000125817	CENPB	U2	ENSG00000128581	IFT22	M2
ENSG00000011143	MKS1	F2	ENSG00000012171	SEMA3B	S2	ENSG00000125834	STK35	U2	ENSG00000128833	MYO5C	M2
ENSG00000011258	MBTD1	F2	ENSG00000012174	MBTPS2	S2	ENSG00000126259	KIRREL2	U2	ENSG00000129295	DNAAF11	M2
ENSG00000011275	RNF216	F2	ENSG00000012232	EXTL3	S2	ENSG00000126261	UBA2	U2	ENSG00000129355	CDKN2D	M2
ENSG00000011304	PTBP1	F2	ENSG00000012963	UBR7	S2	ENSG00000126391	FRMD8	U2	ENSG00000130177	CDC16	M2
ENSG00000011332	DPF1	F2	ENSG00000012983	MAP4K5	S2	ENSG00000126822	PLEKHG3	U2	ENSG00000130635	COL5A1	M2
ENSG00000011347	SYT7	F2	ENSG00000013016	EHD3	S2	ENSG00000126860	EVI2A	U2	ENSG00000130669	PAK4	M2
ENSG00000011376	LARS2	F2	ENSG00000013288	MAN2B2	S2	ENSG00000127084	FGD3	U2	ENSG00000130921	MTRFR	M2
ENSG00000011405	PIK3C2A	F2	ENSG00000013293	SLC7A14	S2	ENSG00000127418	FGFRL1	U2	ENSG00000131018	SYNE1	M2
ENSG00000011465	DCN	F2	ENSG00000013374	NUB1	S2	ENSG00000127884	ECHS1	U2	ENSG00000131044	TTLL9	M2
ENSG00000011478	QPCTL	F2	ENSG00000013375	PGM3	S2	ENSG00000128242	GAL3ST1	U2	ENSG00000131459	GFPT2	M2
ENSG00000011485	PPP5C	F2	ENSG00000013392	RWDD2A	S2	ENSG00000128309	MPST	U2	ENSG00000131951	LRRC9	M2
ENSG00000011523	CEP68	F2	ENSG00000013441	CLK1	S2	ENSG00000129422	MTUS1	U2	ENSG00000132259	CNGA4	M2
ENSG00000011566	MAP4K3	F2	ENSG00000013503	POLR3B	S2	ENSG00000130005	GAMT	U2	ENSG00000132623	ANKEF1	M2
ENSG00000011590	ZBTB32	F2	ENSG00000013523	ANGEL1	S2	ENSG00000130826	DKC1	U2	ENSG00000133067	LGR6	M2
ENSG00000011600	TYROBP	F2	ENSG00000013561	RNF14	S2	ENSG00000131069	ACSS2	U2	ENSG00000133101	CCNA1	M2
ENSG00000011638	LDAF1	F2	ENSG00000013563	DNASE1L1	S2	ENSG00000131773	KHDRBS3	U2	ENSG00000133640	LRRIQ1	M2
ENSG00000012048	BRCA1	F2	ENSG00000013573	DDX11	S2	ENSG00000132205	EMILIN2	U2	ENSG00000133878	DUSP26	M2
ENSG00000012174	MBTPS2	F2	ENSG00000013619	MAMLD1	S2	ENSG00000132702	HAPLN2	U2	ENSG00000134291	TMEM106C	M2
ENSG00000012211	PRICKLE3	F2	ENSG00000014123	UFL1	S2	ENSG00000134198	TSPAN2	U2	ENSG00000135046	ANXA1	M2
ENSG00000012232	EXTL3	F2	ENSG00000014216	CAPN1	S2	ENSG00000134265	NAPG	U2	ENSG00000135241	PNPLA8	M2
ENSG00000012660	ELOVL5	F2	ENSG00000014824	SLC30A9	S2	ENSG00000134330	IAH1	U2	ENSG00000135587	SMPD2	M2
ENSG00000012822	CALCOCO1	F2	ENSG00000014914	MTMR11	S2	ENSG00000134333	LDHA	U2	ENSG00000135632	SMYD5	M2
ENSG00000012963	UBR7	F2	ENSG00000014919	COX15	S2	ENSG00000134779	TPGS2	U2	ENSG00000135740	SLC9A5	M2
ENSG00000012983	MAP4K5	F2	ENSG00000015133	CCDC88C	S2	ENSG00000134780	DAGLA	U2	ENSG00000135951	TSGA10	M2
ENSG00000013016	EHD3	F2	ENSG00000015153	YAF2	S2	ENSG00000135049	AGTPBP1	U2	ENSG00000136279	DBNL	M2
ENSG00000013293	SLC7A14	F2	ENSG00000015171	ZMYND11	S2	ENSG00000135069	PSAT1	U2	ENSG00000136449	MYCBPAP	M2
ENSG00000013306	SLC25A39	F2	ENSG00000015475	BID	S2	ENSG00000135362	PRR5L	U2	ENSG00000136811	ODF2	M2
ENSG00000013364	MVP	F2	ENSG00000015479	MATR3	S2	ENSG00000135424	ITGA7	U2	ENSG00000137075	RNF38	M2
ENSG00000013441	CLK1	F2	ENSG00000015592	STMN4	S2	ENSG00000135678	CPM	U2	ENSG00000137098	SPAG8	M2
ENSG00000013503	POLR3B	F2	ENSG00000015676	NUDCD3	S2	ENSG00000135905	DOCK10	U2	ENSG00000137672	TRPC6	M2
ENSG00000013523	ANGEL1	F2	ENSG00000017260	ATP2C1	S2	ENSG00000136205	TNS3	U2	ENSG00000137691	CFAP300	M2
ENSG00000013563	DNASE1L1	F2	ENSG00000017427	IGF1	S2	ENSG00000136541	ERMN	U2	ENSG00000137731	FXYD2	M2
ENSG00000013583	HEBP1	F2	ENSG00000017483	SLC38A5	S2	ENSG00000137033	IL33	U2	ENSG00000137764	MAP2K5	M2
ENSG00000013619	MAMLD1	F2	ENSG00000017797	RALBP1	S2	ENSG00000137106	GRHPR	U2	ENSG00000137809	ITGA11	M2
ENSG00000014123	UFL1	F2	ENSG00000018189	RUFY3	S2	ENSG00000137177	KIF13A	U2	ENSG00000138193	PLCE1	M2
ENSG00000014138	POLA2	F2	ENSG00000018236	CNTN1	S2	ENSG00000137252	HCRTR2	U2	ENSG00000138375	SMARCAL1	M2
ENSG00000014164	ZC3H3	F2	ENSG00000018510	AGPS	S2	ENSG00000138134	STAMBPL1	U2	ENSG00000138400	MDH1B	M2
ENSG00000014216	CAPN1	F2	ENSG00000018610	STEEP1	S2	ENSG00000138160	KIF11	U2	ENSG00000138433	CIR1	M2
ENSG00000014641	MDH1	F2	ENSG00000018699	TTC27	S2	ENSG00000138756	BMP2K	U2	ENSG00000138587	MNS1	M2
ENSG00000014824	SLC30A9	F2	ENSG00000018869	ZNF582	S2	ENSG00000138760	SCARB2	U2	ENSG00000138792	ENPEP	M2
ENSG00000014919	COX15	F2	ENSG00000019102	VSIG2	S2	ENSG00000138835	RGS3	U2	ENSG00000138823	MTTP	M2
ENSG00000015153	YAF2	F2	ENSG00000019485	PRDM11	S2	ENSG00000139197	PEX5	U2	ENSG00000139324	TMTC3	M2
ENSG00000015171	ZMYND11	F2	ENSG00000019991	HGF	S2	ENSG00000139263	LRIG3	U2	ENSG00000139926	FRMD6	M2
ENSG00000015285	WAS	F2	ENSG00000019995	ZRANB1	S2	ENSG00000139629	GALNT6	U2	ENSG00000140795	MYLK3	M2
ENSG00000015475	BID	F2	ENSG00000020181	ADGRA2	S2	ENSG00000139737	SLAIN1	U2	ENSG00000141519	CCDC40	M2
ENSG00000015676	NUDCD3	F2	ENSG00000020426	MNAT1	S2	ENSG00000140479	PCSK6	U2	ENSG00000141522	ARHGDIA	M2
ENSG00000016864	GLT8D1	F2	ENSG00000020577	SAMD4A	S2	ENSG00000140600	SH3GL3	U2	ENSG00000142609	CFAP74	M2
ENSG00000017260	ATP2C1	F2	ENSG00000020922	MRE11	S2	ENSG00000141337	ARSG	U2	ENSG00000142621	FHAD1	M2
ENSG00000017427	IGF1	F2	ENSG00000021574	SPAST	S2	ENSG00000141433	ADCYAP1	U2	ENSG00000143093	STRIP1	M2
ENSG00000017797	RALBP1	F2	ENSG00000021645	NRXN3	S2	ENSG00000141540	TTYH2	U2	ENSG00000143156	NME7	M2
ENSG00000018280	SLC11A1	F2	ENSG00000021762	OSBPL5	S2	ENSG00000142149	HUNK	U2	ENSG00000143258	USP21	M2
ENSG00000018408	WWTR1	F2	ENSG00000021776	AQR	S2	ENSG00000142453	CARM1	U2	ENSG00000143321	HDGF	M2
ENSG00000018610	STEEP1	F2	ENSG00000022277	RTF2	S2	ENSG00000143079	CTTNBP2NL	U2	ENSG00000143365	RORC	M2
ENSG00000018699	TTC27	F2	ENSG00000022355	GABRA1	S2	ENSG00000143157	POGK	U2	ENSG00000143674	MAP3K21	M2
ENSG00000018869	ZNF582	F2	ENSG00000022567	SLC45A4	S2	ENSG00000143382	ADAMTSL4	U2	ENSG00000143816	WNT9A	M2
ENSG00000019485	PRDM11	F2	ENSG00000023041	ZDHHC6	S2	ENSG00000143418	CERS2	U2	ENSG00000144061	NPHP1	M2
ENSG00000019505	SYT13	F2	ENSG00000023171	GRAMD1B	S2	ENSG00000143514	TP53BP2	U2	ENSG00000144115	THNSL2	M2
ENSG00000019582	CD74	F2	ENSG00000023228	NDUFS1	S2	ENSG00000143815	LBR	U2	ENSG00000144369	FAM171B	M2
ENSG00000019995	ZRANB1	F2	ENSG00000023287	RB1CC1	S2	ENSG00000143847	PPFIA4	U2	ENSG00000144810	COL8A1	M2
ENSG00000020129	NCDN	F2	ENSG00000023318	ERP44	S2	ENSG00000143995	MEIS1	U2	ENSG00000145703	IQGAP2	M2
ENSG00000020256	ZFP64	F2	ENSG00000023445	BIRC3	S2	ENSG00000144283	PKP4	U2	ENSG00000145833	DDX46	M2
ENSG00000020426	MNAT1	F2	ENSG00000023516	AKAP11	S2	ENSG00000144354	CDCA7	U2	ENSG00000146038	DCDC2	M2
ENSG00000021574	SPAST	F2	ENSG00000023608	SNAPC1	S2	ENSG00000144355	DLX1	U2	ENSG00000146221	TCTE1	M2
ENSG00000021645	NRXN3	F2	ENSG00000023734	STRAP	S2	ENSG00000144583	MARCHF4	U2	ENSG00000146374	RSPO3	M2
ENSG00000021776	AQR	F2	ENSG00000023909	GCLM	S2	ENSG00000144746	ARL6IP5	U2	ENSG00000146555	SDK1	M2
ENSG00000021826	CPS1	F2	ENSG00000024048	UBR2	S2	ENSG00000144847	IGSF11	U2	ENSG00000146733	PSPH	M2
ENSG00000022267	FHL1	F2	ENSG00000024862	CCDC28A	S2	ENSG00000144867	SRPRB	U2	ENSG00000147324	MFHAS1	M2
ENSG00000022277	RTF2	F2	ENSG00000025039	RRAGD	S2	ENSG00000145022	TCTA	U2	ENSG00000147400	CETN2	M2
ENSG00000022567	SLC45A4	F2	ENSG00000025156	HSF2	S2	ENSG00000145220	LYAR	U2	ENSG00000148484	RSU1	M2
ENSG00000023041	ZDHHC6	F2	ENSG00000025293	PHF20	S2	ENSG00000145335	SNCA	U2	ENSG00000148814	LRRC27	M2
ENSG00000023171	GRAMD1B	F2	ENSG00000025770	NCAPH2	S2	ENSG00000145386	CCNA2	U2	ENSG00000148943	LIN7C	M2
ENSG00000023228	NDUFS1	F2	ENSG00000025772	TOMM34	S2	ENSG00000146122	DAAM2	U2	ENSG00000149131	SERPING1	M2
ENSG00000023318	ERP44	F2	ENSG00000025796	SEC63	S2	ENSG00000146267	FAXC	U2	ENSG00000149136	SSRP1	M2
ENSG00000023330	ALAS1	F2	ENSG00000025800	KPNA6	S2	ENSG00000147036	LANCL3	U2	ENSG00000149201	CCDC81	M2
ENSG00000023516	AKAP11	F2	ENSG00000026508	CD44	S2	ENSG00000147041	SYTL5	U2	ENSG00000149243	KLHL35	M2
ENSG00000023608	SNAPC1	F2	ENSG00000026559	KCNG1	S2	ENSG00000147419	CCDC25	U2	ENSG00000150628	SPATA4	M2
ENSG00000023697	DERA	F2	ENSG00000027001	MIPEP	S2	ENSG00000147459	DOCK5	U2	ENSG00000150630	VEGFC	M2
ENSG00000023734	STRAP	F2	ENSG00000027075	PRKCH	S2	ENSG00000147488	ST18	U2	ENSG00000150773	PIH1D2	M2
ENSG00000024048	UBR2	F2	ENSG00000028116	VRK2	S2	ENSG00000147874	HAUS6	U2	ENSG00000151023	ENKUR	M2
ENSG00000024422	EHD2	F2	ENSG00000028137	TNFRSF1B	S2	ENSG00000148180	GSN	U2	ENSG00000151176	PLBD2	M2
ENSG00000024862	CCDC28A	F2	ENSG00000028203	VEZT	S2	ENSG00000148700	ADD3	U2	ENSG00000151575	TEX9	M2
ENSG00000025708	TYMP	F2	ENSG00000028528	SNX1	S2	ENSG00000148826	NKX6-2	U2	ENSG00000151882	CCL28	M2
ENSG00000025770	NCAPH2	F2	ENSG00000028839	TBPL1	S2	ENSG00000150051	MKX	U2	ENSG00000152127	MGAT5	M2
ENSG00000025796	SEC63	F2	ENSG00000029363	BCLAF1	S2	ENSG00000150394	CDH8	U2	ENSG00000152242	C18orf25	M2
ENSG00000027001	MIPEP	F2	ENSG00000029364	SLC39A9	S2	ENSG00000151338	MIPOL1	U2	ENSG00000152611	CAPSL	M2
ENSG00000027075	PRKCH	F2	ENSG00000029534	ANK1	S2	ENSG00000151414	NEK7	U2	ENSG00000152763	DNAI4	M2
ENSG00000027847	B4GALT7	F2	ENSG00000029639	TFB1M	S2	ENSG00000151552	QDPR	U2	ENSG00000152936	LMNTD1	M2
ENSG00000028116	VRK2	F2	ENSG00000029725	RABEP1	S2	ENSG00000151572	ANO4	U2	ENSG00000153832	FBXO36	M2
ENSG00000028137	TNFRSF1B	F2	ENSG00000029993	HMGB3	S2	ENSG00000151779	NBAS	U2	ENSG00000154127	UBASH3B	M2
ENSG00000028203	VEZT	F2	ENSG00000030066	NUP160	S2	ENSG00000151892	GFRA1	U2	ENSG00000154451	GBP5	M2
ENSG00000028277	POU2F2	F2	ENSG00000030582	GRN	S2	ENSG00000151914	DST	U2	ENSG00000154479	CFAP210	M2
ENSG00000028310	BRD9	F2	ENSG00000031003	FAM13B	S2	ENSG00000152092	ASTN1	U2	ENSG00000154781	CCDC174	M2
ENSG00000028839	TBPL1	F2	ENSG00000031081	ARHGAP31	S2	ENSG00000152128	TMEM163	U2	ENSG00000155256	ZFYVE27	M2
ENSG00000029153	BMAL2	F2	ENSG00000032219	ARID4A	S2	ENSG00000152229	PSTPIP2	U2	ENSG00000155846	PPARGC1B	M2
ENSG00000029363	BCLAF1	F2	ENSG00000032389	EIPR1	S2	ENSG00000152315	KCNK13	U2	ENSG00000156042	CFAP70	M2
ENSG00000029534	ANK1	F2	ENSG00000032742	IFT88	S2	ENSG00000152503	TRIM36	U2	ENSG00000156510	HKDC1	M2
ENSG00000029639	TFB1M	F2	ENSG00000033050	ABCF2	S2	ENSG00000153048	CARHSP1	U2	ENSG00000157224	CLDN12	M2
ENSG00000029725	RABEP1	F2	ENSG00000033122	LRRC7	S2	ENSG00000153406	NMRAL1	U2	ENSG00000157578	LCA5L	M2
ENSG00000029993	HMGB3	F2	ENSG00000033170	FUT8	S2	ENSG00000153721	CNKSR3	U2	ENSG00000157796	WDR19	M2
ENSG00000030066	NUP160	F2	ENSG00000033178	UBA6	S2	ENSG00000153902	LGI4	U2	ENSG00000157823	AP3S2	M2
ENSG00000030110	BAK1	F2	ENSG00000033327	GAB2	S2	ENSG00000153904	DDAH1	U2	ENSG00000157856	DRC1	M2
ENSG00000030419	IKZF2	F2	ENSG00000033800	PIAS1	S2	ENSG00000154493	C10orf90	U2	ENSG00000158023	CFAP251	M2
ENSG00000030582	GRN	F2	ENSG00000033867	SLC4A7	S2	ENSG00000154678	PDE1C	U2	ENSG00000158062	UBXN11	M2
ENSG00000031081	ARHGAP31	F2	ENSG00000034053	APBA2	S2	ENSG00000154736	ADAMTS5	U2	ENSG00000158163	DZIP1L	M2
ENSG00000031691	CENPQ	F2	ENSG00000034239	CLXN	S2	ENSG00000155465	SLC7A7	U2	ENSG00000158486	DNAH3	M2
ENSG00000031698	SARS1	F2	ENSG00000034533	ASTE1	S2	ENSG00000155744	HYCC2	U2	ENSG00000158816	VWA5B1	M2
ENSG00000031823	RANBP3	F2	ENSG00000034677	RNF19A	S2	ENSG00000155792	DEPTOR	U2	ENSG00000159588	CCDC17	M2
ENSG00000032219	ARID4A	F2	ENSG00000034693	PEX3	S2	ENSG00000155980	KIF5A	U2	ENSG00000159713	TPPP3	M2
ENSG00000032389	EIPR1	F2	ENSG00000034713	GABARAPL2	S2	ENSG00000156804	FBXO32	U2	ENSG00000159753	CARMIL2	M2
ENSG00000032444	PNPLA6	F2	ENSG00000035115	SH3YL1	S2	ENSG00000157827	FMNL2	U2	ENSG00000159873	CCDC117	M2
ENSG00000033030	ZCCHC8	F2	ENSG00000035141	FAM136A	S2	ENSG00000157985	AGAP1	U2	ENSG00000160050	CCDC28B	M2
ENSG00000033050	ABCF2	F2	ENSG00000035403	VCL	S2	ENSG00000158486	DNAH3	U2	ENSG00000160051	IQCC	M2
ENSG00000033100	CHPF2	F2	ENSG00000035681	NSMAF	S2	ENSG00000158859	ADAMTS4	U2	ENSG00000160188	RSPH1	M2
ENSG00000033170	FUT8	F2	ENSG00000035687	ADSS2	S2	ENSG00000159176	CSRP1	U2	ENSG00000160345	PIERCE1	M2
ENSG00000033178	UBA6	F2	ENSG00000035862	TIMP2	S2	ENSG00000159640	ACE	U2	ENSG00000160401	CFAP157	M2
ENSG00000033627	ATP6V0A1	F2	ENSG00000035928	RFC1	S2	ENSG00000159658	EFCAB14	U2	ENSG00000160551	TAOK1	M2
ENSG00000033800	PIAS1	F2	ENSG00000036054	TBC1D23	S2	ENSG00000160124	MIX23	U2	ENSG00000160838	LRRC71	M2
ENSG00000033867	SLC4A7	F2	ENSG00000036257	CUL3	S2	ENSG00000160199	PKNOX1	U2	ENSG00000161270	NPHS1	M2
ENSG00000034053	APBA2	F2	ENSG00000036549	ZZZ3	S2	ENSG00000160213	CSTB	U2	ENSG00000161654	LSM12	M2
ENSG00000034152	MAP2K3	F2	ENSG00000036672	USP2	S2	ENSG00000160305	DIP2A	U2	ENSG00000161996	WDR90	M2
ENSG00000034533	ASTE1	F2	ENSG00000037280	FLT4	S2	ENSG00000160767	ENTREP3	U2	ENSG00000162004	CCDC78	M2
ENSG00000034677	RNF19A	F2	ENSG00000037474	NSUN2	S2	ENSG00000161677	JOSD2	U2	ENSG00000162144	CYB561A3	M2
ENSG00000035115	SH3YL1	F2	ENSG00000037637	FBXO42	S2	ENSG00000162409	PRKAA2	U2	ENSG00000162542	TMCO4	M2
ENSG00000035141	FAM136A	F2	ENSG00000037749	MFAP3	S2	ENSG00000162441	LZIC	U2	ENSG00000162543	UBXN10	M2
ENSG00000035403	VCL	F2	ENSG00000037897	METTL1	S2	ENSG00000162521	RBBP4	U2	ENSG00000162620	LRRIQ3	M2
ENSG00000035681	NSMAF	F2	ENSG00000038002	AGA	S2	ENSG00000162714	ZNF496	U2	ENSG00000163083	INHBB	M2
ENSG00000035687	ADSS2	F2	ENSG00000038219	BOD1L1	S2	ENSG00000162885	B3GALNT2	U2	ENSG00000163093	BBS5	M2
ENSG00000035928	RFC1	F2	ENSG00000038274	MAT2B	S2	ENSG00000162951	LRRTM1	U2	ENSG00000163132	MSX1	M2
ENSG00000036549	ZZZ3	F2	ENSG00000038382	TRIO	S2	ENSG00000163444	TMEM183A	U2	ENSG00000163214	DHX57	M2
ENSG00000036672	USP2	F2	ENSG00000038427	VCAN	S2	ENSG00000163710	PCOLCE2	U2	ENSG00000163297	ANTXR2	M2
ENSG00000037042	TUBG2	F2	ENSG00000038532	CLEC16A	S2	ENSG00000164104	HMGB2	U2	ENSG00000163320	CGGBP1	M2
ENSG00000037474	NSUN2	F2	ENSG00000039123	MTREX	S2	ENSG00000164124	TMEM144	U2	ENSG00000163349	HIPK1	M2
ENSG00000037637	FBXO42	F2	ENSG00000039139	DNAH5	S2	ENSG00000164161	HHIP	U2	ENSG00000163482	STK36	M2
ENSG00000037749	MFAP3	F2	ENSG00000039560	RAI14	S2	ENSG00000164181	ELOVL7	U2	ENSG00000163521	GLB1L	M2
ENSG00000037897	METTL1	F2	ENSG00000040199	PHLPP2	S2	ENSG00000164303	ENPP6	U2	ENSG00000163617	CCDC191	M2
ENSG00000038002	AGA	F2	ENSG00000040341	STAU2	S2	ENSG00000164484	TMEM200A	U2	ENSG00000163806	SPDYA	M2
ENSG00000038210	PI4K2B	F2	ENSG00000040487	SLC66A1	S2	ENSG00000164651	SP8	U2	ENSG00000163832	ELP6	M2
ENSG00000038219	BOD1L1	F2	ENSG00000040531	CTNS	S2	ENSG00000165195	PIGA	U2	ENSG00000163873	GRIK3	M2
ENSG00000038295	TLL1	F2	ENSG00000040633	PHF23	S2	ENSG00000165233	CARD19	U2	ENSG00000163885	CFAP100	M2
ENSG00000038427	VCAN	F2	ENSG00000040731	CDH10	S2	ENSG00000165282	PIGO	U2	ENSG00000164023	SGMS2	M2
ENSG00000038532	CLEC16A	F2	ENSG00000040933	INPP4A	S2	ENSG00000165379	LRFN5	U2	ENSG00000164105	SAP30	M2
ENSG00000039523	RIPOR1	F2	ENSG00000041353	RAB27B	S2	ENSG00000165406	MARCHF8	U2	ENSG00000164294	GPX8	M2
ENSG00000039650	PNKP	F2	ENSG00000041357	PSMA4	S2	ENSG00000165476	REEP3	U2	ENSG00000164398	ACSL6	M2
ENSG00000040341	STAU2	F2	ENSG00000041515	MYO16	S2	ENSG00000165495	PKNOX2	U2	ENSG00000164610	RP9	M2
ENSG00000040531	CTNS	F2	ENSG00000041802	LSG1	S2	ENSG00000166086	JAM3	U2	ENSG00000164675	IQUB	M2
ENSG00000040608	RTN4R	F2	ENSG00000041982	TNC	S2	ENSG00000166206	GABRB3	U2	ENSG00000164694	FNDC1	M2
ENSG00000040633	PHF23	F2	ENSG00000042088	TDP1	S2	ENSG00000166289	PLEKHF1	U2	ENSG00000164953	TMEM67	M2
ENSG00000041357	PSMA4	F2	ENSG00000042286	AIFM2	S2	ENSG00000166348	USP54	U2	ENSG00000165084	C8orf34	M2
ENSG00000041515	MYO16	F2	ENSG00000042317	SPATA7	S2	ENSG00000166603	MC4R	U2	ENSG00000165115	KIF27	M2
ENSG00000041802	LSG1	F2	ENSG00000042429	MED17	S2	ENSG00000166896	ATP23	U2	ENSG00000165259	HDX	M2
ENSG00000041880	PARP3	F2	ENSG00000043143	JADE2	S2	ENSG00000166912	MTMR10	U2	ENSG00000165359	INTS6L	M2
ENSG00000041982	TNC	F2	ENSG00000043355	ZIC2	S2	ENSG00000167037	SGSM1	U2	ENSG00000165555	NOXRED1	M2
ENSG00000041988	THAP3	F2	ENSG00000043462	LCP2	S2	ENSG00000167191	GPRC5B	U2	ENSG00000165695	AK8	M2
ENSG00000042286	AIFM2	F2	ENSG00000044090	CUL7	S2	ENSG00000167550	RHEBL1	U2	ENSG00000165923	AGBL2	M2
ENSG00000042317	SPATA7	F2	ENSG00000044459	CNTLN	S2	ENSG00000167578	RAB4B	U2	ENSG00000166073	GPR176	M2
ENSG00000042429	MED17	F2	ENSG00000046647	GEMIN8	S2	ENSG00000167641	PPP1R14A	U2	ENSG00000166337	TAF10	M2
ENSG00000042753	AP2S1	F2	ENSG00000046651	OFD1	S2	ENSG00000167874	TMEM88	U2	ENSG00000166352	IFTAP	M2
ENSG00000043143	JADE2	F2	ENSG00000046653	GPM6B	S2	ENSG00000167930	FAM234A	U2	ENSG00000166483	WEE1	M2
ENSG00000043462	LCP2	F2	ENSG00000047056	WDR37	S2	ENSG00000168056	LTBP3	U2	ENSG00000166578	IQCD	M2
ENSG00000043514	TRIT1	F2	ENSG00000047188	YTHDC2	S2	ENSG00000168280	KIF5C	U2	ENSG00000166603	MC4R	M2
ENSG00000043591	ADRB1	F2	ENSG00000047230	CTPS2	S2	ENSG00000168314	MOBP	U2	ENSG00000166816	LDHD	M2
ENSG00000044459	CNTLN	F2	ENSG00000047249	ATP6V1H	S2	ENSG00000168461	RAB31	U2	ENSG00000166825	ANPEP	M2
ENSG00000044574	HSPA5	F2	ENSG00000047315	POLR2B	S2	ENSG00000168481	LGI3	U2	ENSG00000167103	PIP5KL1	M2
ENSG00000046647	GEMIN8	F2	ENSG00000047346	ATOSA	S2	ENSG00000169136	ATF5	U2	ENSG00000167608	TMC4	M2
ENSG00000046651	OFD1	F2	ENSG00000047365	ARAP2	S2	ENSG00000169504	CLIC4	U2	ENSG00000167700	MFSD3	M2
ENSG00000046653	GPM6B	F2	ENSG00000047410	TPR	S2	ENSG00000169562	GJB1	U2	ENSG00000167858	TEKT1	M2
ENSG00000046889	PREX2	F2	ENSG00000047457	CP	S2	ENSG00000170324	FRMPD2	U2	ENSG00000168038	ULK4	M2
ENSG00000047188	YTHDC2	F2	ENSG00000047578	KATNIP	S2	ENSG00000170579	DLGAP1	U2	ENSG00000168477	TNXB	M2
ENSG00000047230	CTPS2	F2	ENSG00000047579	DTNBP1	S2	ENSG00000170775	GPR37	U2	ENSG00000168517	HEXIM2	M2
ENSG00000047346	ATOSA	F2	ENSG00000047597	XK	S2	ENSG00000171316	CHD7	U2	ENSG00000168685	IL7R	M2
ENSG00000047457	CP	F2	ENSG00000047621	C12orf4	S2	ENSG00000171462	DLK2	U2	ENSG00000169071	ROR2	M2
ENSG00000047578	KATNIP	F2	ENSG00000047648	ARHGAP6	S2	ENSG00000171766	GATM	U2	ENSG00000169221	TBC1D10B	M2
ENSG00000047579	DTNBP1	F2	ENSG00000047662	FAM184B	S2	ENSG00000171877	FRMD5	U2	ENSG00000169379	ARL13B	M2
ENSG00000047662	FAM184B	F2	ENSG00000047932	GOPC	S2	ENSG00000172005	MAL	U2	ENSG00000169683	LRRC45	M2
ENSG00000048028	USP28	F2	ENSG00000048052	HDAC9	S2	ENSG00000172167	MTBP	U2	ENSG00000170270	GON7	M2
ENSG00000048052	HDAC9	F2	ENSG00000048162	NOP16	S2	ENSG00000172197	MBOAT1	U2	ENSG00000170324	FRMPD2	M2
ENSG00000048140	TSPAN17	F2	ENSG00000048342	CC2D2A	S2	ENSG00000172264	MACROD2	U2	ENSG00000170482	SLC23A1	M2
ENSG00000048162	NOP16	F2	ENSG00000048392	RRM2B	S2	ENSG00000172331	BPGM	U2	ENSG00000171811	CFAP46	M2
ENSG00000048342	CC2D2A	F2	ENSG00000048405	ZNF800	S2	ENSG00000172548	NIPAL4	U2	ENSG00000171962	DRC3	M2
ENSG00000048392	RRM2B	F2	ENSG00000048471	SNX29	S2	ENSG00000172939	OXSR1	U2	ENSG00000172349	IL16	M2
ENSG00000048544	MRPS10	F2	ENSG00000048540	LMO3	S2	ENSG00000173548	SNX33	U2	ENSG00000172426	RSPH9	M2
ENSG00000048649	RSF1	F2	ENSG00000048649	RSF1	S2	ENSG00000173786	CNP	U2	ENSG00000172613	RAD9A	M2
ENSG00000048740	CELF2	F2	ENSG00000048707	VPS13D	S2	ENSG00000173918	C1QTNF1	U2	ENSG00000173208	ABCD2	M2
ENSG00000048828	FAM120A	F2	ENSG00000048740	CELF2	S2	ENSG00000174607	UGT8	U2	ENSG00000173442	EHBP1L1	M2
ENSG00000048991	R3HDM1	F2	ENSG00000048828	FAM120A	S2	ENSG00000175104	TRAF6	U2	ENSG00000173540	GMPPB	M2
ENSG00000049089	COL9A2	F2	ENSG00000049130	KITLG	S2	ENSG00000175264	CHST1	U2	ENSG00000173588	CEP83	M2
ENSG00000049130	KITLG	F2	ENSG00000049167	ERCC8	S2	ENSG00000175274	TP53I11	U2	ENSG00000173838	MARCHF10	M2
ENSG00000049167	ERCC8	F2	ENSG00000049449	RCN1	S2	ENSG00000175416	CLTB	U2	ENSG00000175183	CSRP2	M2
ENSG00000049192	ADAMTS6	F2	ENSG00000049540	ELN	S2	ENSG00000175874	CREG2	U2	ENSG00000175267	VWA3A	M2
ENSG00000049239	H6PD	F2	ENSG00000049618	ARID1B	S2	ENSG00000176055	MBLAC2	U2	ENSG00000175318	GRAMD2A	M2
ENSG00000049246	PER3	F2	ENSG00000049656	CLPTM1L	S2	ENSG00000176381	PRR18	U2	ENSG00000175764	TTLL11	M2
ENSG00000049323	LTBP1	F2	ENSG00000049759	NEDD4L	S2	ENSG00000176402	GJC3	U2	ENSG00000175792	RUVBL1	M2
ENSG00000049860	HEXB	F2	ENSG00000049860	HEXB	S2	ENSG00000176658	MYO1D	U2	ENSG00000175970	UNC119B	M2
ENSG00000050165	DKK3	F2	ENSG00000049883	PTCD2	S2	ENSG00000176974	SHMT1	U2	ENSG00000175984	DENND2C	M2
ENSG00000050393	MCUR1	F2	ENSG00000050030	NEXMIF	S2	ENSG00000177084	POLE	U2	ENSG00000176601	MAP3K19	M2
ENSG00000050426	LETMD1	F2	ENSG00000050165	DKK3	S2	ENSG00000177156	TALDO1	U2	ENSG00000176732	PFN4	M2
ENSG00000050628	PTGER3	F2	ENSG00000050327	ARHGEF5	S2	ENSG00000177182	CLVS1	U2	ENSG00000177272	KCNA3	M2
ENSG00000050748	MAPK9	F2	ENSG00000050393	MCUR1	S2	ENSG00000177885	GRB2	U2	ENSG00000177425	PAWR	M2
ENSG00000050820	BCAR1	F2	ENSG00000050405	LIMA1	S2	ENSG00000179163	FUCA1	U2	ENSG00000177519	RPRM	M2
ENSG00000051108	HERPUD1	F2	ENSG00000050438	SLC4A8	S2	ENSG00000179178	TMEM125	U2	ENSG00000177885	GRB2	M2
ENSG00000051341	POLQ	F2	ENSG00000050555	LAMC3	S2	ENSG00000179241	LDLRAD3	U2	ENSG00000178125	PPP1R42	M2
ENSG00000051523	CYBA	F2	ENSG00000050628	PTGER3	S2	ENSG00000179295	PTPN11	U2	ENSG00000178149	DALRD3	M2
ENSG00000051620	HEBP2	F2	ENSG00000050748	MAPK9	S2	ENSG00000180096	SEPTIN1	U2	ENSG00000178773	CPNE7	M2
ENSG00000051825	MPHOSPH9	F2	ENSG00000050767	COL23A1	S2	ENSG00000180198	RCC1	U2	ENSG00000179029	TMEM107	M2
ENSG00000052126	PLEKHA5	F2	ENSG00000051009	FHIP1B	S2	ENSG00000180287	PLD5	U2	ENSG00000179071	CCDC89	M2
ENSG00000052723	SIKE1	F2	ENSG00000051382	PIK3CB	S2	ENSG00000180336	MEIOC	U2	ENSG00000179299	NSUN7	M2
ENSG00000052749	RRP12	F2	ENSG00000051596	THOC3	S2	ENSG00000180611	MB21D2	U2	ENSG00000179846	NKPD1	M2
ENSG00000052795	FNIP2	F2	ENSG00000052723	SIKE1	S2	ENSG00000180739	S1PR5	U2	ENSG00000179902	CFAP276	M2
ENSG00000052802	MSMO1	F2	ENSG00000052749	RRP12	S2	ENSG00000180929	GPR62	U2	ENSG00000180758	GPR157	M2
ENSG00000052841	TTC17	F2	ENSG00000052795	FNIP2	S2	ENSG00000181026	AEN	U2	ENSG00000181378	CFAP65	M2
ENSG00000052850	ALX4	F2	ENSG00000052802	MSMO1	S2	ENSG00000181915	ADO	U2	ENSG00000181619	GPR135	M2
ENSG00000053372	MRTO4	F2	ENSG00000052841	TTC17	S2	ENSG00000182054	IDH2	U2	ENSG00000181652	ATG9B	M2
ENSG00000053702	NRIP2	F2	ENSG00000052850	ALX4	S2	ENSG00000182325	FBXL6	U2	ENSG00000182224	CYB5D1	M2
ENSG00000053770	AP5M1	F2	ENSG00000053747	LAMA3	S2	ENSG00000182968	SOX1	U2	ENSG00000182329	KIAA2012	M2
ENSG00000053900	ANAPC4	F2	ENSG00000053770	AP5M1	S2	ENSG00000183255	PTTG1IP	U2	ENSG00000182378	PLCXD1	M2
ENSG00000054116	TRAPPC3	F2	ENSG00000053900	ANAPC4	S2	ENSG00000183662	TAFA1	U2	ENSG00000182446	NPLOC4	M2
ENSG00000054118	THRAP3	F2	ENSG00000054118	THRAP3	S2	ENSG00000184144	CNTN2	U2	ENSG00000182667	NTM	M2
ENSG00000054179	ENTPD2	F2	ENSG00000054179	ENTPD2	S2	ENSG00000184481	FOXO4	U2	ENSG00000182718	ANXA2	M2
ENSG00000054267	ARID4B	F2	ENSG00000054219	LY75	S2	ENSG00000184743	ATL3	U2	ENSG00000182771	GRID1	M2
ENSG00000054277	OPN3	F2	ENSG00000054267	ARID4B	S2	ENSG00000184992	BRI3BP	U2	ENSG00000182831	HAPSTR1	M2
ENSG00000054282	SDCCAG8	F2	ENSG00000054277	OPN3	S2	ENSG00000185008	ROBO2	U2	ENSG00000183091	NEB	M2
ENSG00000054392	HHAT	F2	ENSG00000054392	HHAT	S2	ENSG00000185798	WDR53	U2	ENSG00000183098	GPC6	M2
ENSG00000054611	TBC1D22A	F2	ENSG00000054523	KIF1B	S2	ENSG00000185813	PCYT2	U2	ENSG00000183317	EPHA10	M2
ENSG00000054654	SYNE2	F2	ENSG00000054598	FOXC1	S2	ENSG00000185896	LAMP1	U2	ENSG00000183337	BCOR	M2
ENSG00000054793	ATP9A	F2	ENSG00000054611	TBC1D22A	S2	ENSG00000186260	MRTFB	U2	ENSG00000183346	CABCOCO1	M2
ENSG00000054967	RELT	F2	ENSG00000054654	SYNE2	S2	ENSG00000187164	SHTN1	U2	ENSG00000183578	TNFAIP8L3	M2
ENSG00000054983	GALC	F2	ENSG00000054965	FAM168A	S2	ENSG00000187239	FNBP1	U2	ENSG00000183690	EFHC2	M2
ENSG00000055130	CUL1	F2	ENSG00000054967	RELT	S2	ENSG00000188026	RILPL1	U2	ENSG00000183831	ANKRD45	M2
ENSG00000055208	TAB2	F2	ENSG00000054983	GALC	S2	ENSG00000188352	FOCAD	U2	ENSG00000183833	CFAP91	M2
ENSG00000055211	GINM1	F2	ENSG00000055044	NOP58	S2	ENSG00000188706	ZDHHC9	U2	ENSG00000183914	DNAH2	M2
ENSG00000055483	USP36	F2	ENSG00000055130	CUL1	S2	ENSG00000189060	H1-0	U2	ENSG00000184500	PROS1	M2
ENSG00000055609	KMT2C	F2	ENSG00000055163	CYFIP2	S2	ENSG00000189067	LITAF	U2	ENSG00000184719	RNLS	M2
ENSG00000055917	PUM2	F2	ENSG00000055208	TAB2	S2	ENSG00000196083	IL1RAP	U2	ENSG00000184828	ZBTB7C	M2
ENSG00000055950	MRPL43	F2	ENSG00000055609	KMT2C	S2	ENSG00000196123	MATCAP1	U2	ENSG00000184898	RBM43	M2
ENSG00000056050	HPF1	F2	ENSG00000055813	CCDC85A	S2	ENSG00000196187	TMEM63A	U2	ENSG00000185024	BRF1	M2
ENSG00000056097	ZFR	F2	ENSG00000055917	PUM2	S2	ENSG00000196227	FAM217B	U2	ENSG00000185043	CIB1	M2
ENSG00000056277	ZNF280C	F2	ENSG00000056050	HPF1	S2	ENSG00000196365	LONP1	U2	ENSG00000185250	PPIL6	M2
ENSG00000056586	RC3H2	F2	ENSG00000056097	ZFR	S2	ENSG00000196586	MYO6	U2	ENSG00000185261	KIAA0825	M2
ENSG00000057019	DCBLD2	F2	ENSG00000056277	ZNF280C	S2	ENSG00000196950	SLC39A10	U2	ENSG00000185483	ROR1	M2
ENSG00000057252	SOAT1	F2	ENSG00000056487	PHF21B	S2	ENSG00000197430	OPALIN	U2	ENSG00000185860	CCDC190	M2
ENSG00000057294	PKP2	F2	ENSG00000056586	RC3H2	S2	ENSG00000197653	DNAH10	U2	ENSG00000185989	RASA3	M2
ENSG00000057608	GDI2	F2	ENSG00000056972	TRAF3IP2	S2	ENSG00000197780	TAF13	U2	ENSG00000186017	ZNF566	M2
ENSG00000057757	PITHD1	F2	ENSG00000057252	SOAT1	S2	ENSG00000197892	KIF13B	U2	ENSG00000186184	POLR1D	M2
ENSG00000058056	USP13	F2	ENSG00000057294	PKP2	S2	ENSG00000197971	MBP	U2	ENSG00000186283	TOR3A	M2
ENSG00000058063	ATP11B	F2	ENSG00000057608	GDI2	S2	ENSG00000198121	LPAR1	U2	ENSG00000186352	ANKRD37	M2
ENSG00000058085	LAMC2	F2	ENSG00000057663	ATG5	S2	ENSG00000198597	ZNF536	U2	ENSG00000186638	KIF24	M2
ENSG00000058262	SEC61A1	F2	ENSG00000057757	PITHD1	S2	ENSG00000198680	TUSC1	U2	ENSG00000186952	TMEM232	M2
ENSG00000058272	PPP1R12A	F2	ENSG00000057935	MTA3	S2	ENSG00000198753	PLXNB3	U2	ENSG00000186976	EFCAB6	M2
ENSG00000058335	RASGRF1	F2	ENSG00000058056	USP13	S2	ENSG00000198774	RASSF9	U2	ENSG00000187123	LYPD6	M2
ENSG00000058453	CROCC	F2	ENSG00000058063	ATP11B	S2	ENSG00000198835	GJC2	U2	ENSG00000187240	DYNC2H1	M2
ENSG00000058600	POLR3E	F2	ENSG00000058085	LAMC2	S2	ENSG00000198934	MAGEE1	U2	ENSG00000187905	LRRC74B	M2
ENSG00000058799	YIPF1	F2	ENSG00000058091	CDK14	S2	ENSG00000203705	TATDN3	U2	ENSG00000188177	ZC3H6	M2
ENSG00000058804	NDC1	F2	ENSG00000058262	SEC61A1	S2	ENSG00000203727	SAMD5	U2	ENSG00000188316	ENO4	M2
ENSG00000059122	FLYWCH1	F2	ENSG00000058272	PPP1R12A	S2	ENSG00000203867	RBM20	U2	ENSG00000188452	CERKL	M2
ENSG00000059145	UNKL	F2	ENSG00000058335	RASGRF1	S2	ENSG00000204128	C2orf72	U2	ENSG00000188596	CFAP54	M2
ENSG00000059377	TBXAS1	F2	ENSG00000058404	CAMK2B	S2	ENSG00000204227	RING1	U2	ENSG00000188659	SAXO2	M2
ENSG00000059378	PARP12	F2	ENSG00000058600	POLR3E	S2	ENSG00000204348	DXO	U2	ENSG00000188739	RBM34	M2
ENSG00000059573	ALDH18A1	F2	ENSG00000058668	ATP2B4	S2	ENSG00000204472	AIF1	U2	ENSG00000188931	CFAP126	M2
ENSG00000059691	GATB	F2	ENSG00000058804	NDC1	S2	ENSG00000204655	MOG	U2	ENSG00000189007	ADAT2	M2
ENSG00000059728	MXD1	F2	ENSG00000058866	DGKG	S2	ENSG00000204852	TCTN1	U2	ENSG00000189159	JPT1	M2
ENSG00000059769	DNAJC25	F2	ENSG00000059122	FLYWCH1	S2	ENSG00000204950	LRRC10B	U2	ENSG00000189350	TOGARAM2	M2
ENSG00000060069	CTDP1	F2	ENSG00000059145	UNKL	S2	ENSG00000205116	TMEM88B	U2	ENSG00000189431	RASSF10	M2
ENSG00000060138	YBX3	F2	ENSG00000059573	ALDH18A1	S2	ENSG00000211454	AKR7L	U2	ENSG00000196449	YRDC	M2
ENSG00000060237	WNK1	F2	ENSG00000059588	TARBP1	S2	ENSG00000214456	PLIN5	U2	ENSG00000197442	MAP3K5	M2
ENSG00000060339	CCAR1	F2	ENSG00000059691	GATB	S2	ENSG00000215018	COL28A1	U2	ENSG00000197565	COL4A6	M2
ENSG00000060558	GNA15	F2	ENSG00000059728	MXD1	S2	ENSG00000215045	GRID2IP	U2	ENSG00000197594	ENPP1	M2
ENSG00000060642	PIGV	F2	ENSG00000059758	CDK17	S2	ENSG00000217236	SP9	U2	ENSG00000197653	DNAH10	M2
ENSG00000060688	SNRNP40	F2	ENSG00000059769	DNAJC25	S2	ENSG00000221955	SLC12A8	U2	ENSG00000197702	PARVA	M2
ENSG00000060718	COL11A1	F2	ENSG00000060069	CTDP1	S2	ENSG00000241839	PLEKHO2	U2	ENSG00000197748	CFAP43	M2
ENSG00000060749	QSER1	F2	ENSG00000060339	CCAR1	S2	ENSG00000242612	DECR2	U2	ENSG00000197980	LEKR1	M2
ENSG00000061337	LZTS1	F2	ENSG00000060558	GNA15	S2	ENSG00000244274	DBNDD2	U2	ENSG00000198003	ODAD3	M2
ENSG00000061676	NCKAP1	F2	ENSG00000060642	PIGV	S2	ENSG00000244607	CCDC13	U2	ENSG00000198018	ENTPD7	M2
ENSG00000061794	MRPS35	F2	ENSG00000060709	RIMBP2	S2	ENSG00000264522	OTUD7B	U2	ENSG00000198399	ITSN2	M2
ENSG00000061936	SFSWAP	F2	ENSG00000060718	COL11A1	S2	ENSG00000276043	UHRF1	U2	ENSG00000198546	ZNF511	M2
ENSG00000061987	MON2	F2	ENSG00000060749	QSER1	S2	ENSG00000276600	RAB7B	U2	ENSG00000198589	LRBA	M2
ENSG00000062194	GPBP1	F2	ENSG00000060762	MPC1	S2	ENSG00000000460	C1orf112	U3	ENSG00000198736	MSRB1	M2
ENSG00000062582	MRPS24	F2	ENSG00000060982	BCAT1	S2	ENSG00000002587	HS3ST1	U3	ENSG00000198774	RASSF9	M2
ENSG00000062598	ELMO2	F2	ENSG00000061337	LZTS1	S2	ENSG00000004779	NDUFAB1	U3	ENSG00000198939	ZFP2	M2
ENSG00000062650	WAPL	F2	ENSG00000061676	NCKAP1	S2	ENSG00000004799	PDK4	U3	ENSG00000203666	EFCAB2	M2
ENSG00000062725	APPBP2	F2	ENSG00000061918	GUCY1B1	S2	ENSG00000005022	SLC25A5	U3	ENSG00000203734	ECT2L	M2
ENSG00000062822	POLD1	F2	ENSG00000061938	TNK2	S2	ENSG00000005882	PDK2	U3	ENSG00000203780	FANK1	M2
ENSG00000063169	BICRA	F2	ENSG00000061987	MON2	S2	ENSG00000005884	ITGA3	U3	ENSG00000204104	TRAF3IP1	M2
ENSG00000063176	SPHK2	F2	ENSG00000062194	GPBP1	S2	ENSG00000006530	AGK	U3	ENSG00000204536	CCHCR1	M2
ENSG00000063180	CA11	F2	ENSG00000062282	DGAT2	S2	ENSG00000006715	VPS41	U3	ENSG00000204815	ODAD4	M2
ENSG00000063244	U2AF2	F2	ENSG00000062370	ZNF112	S2	ENSG00000007168	PAFAH1B1	U3	ENSG00000204852	TCTN1	M2
ENSG00000063322	MED29	F2	ENSG00000062524	LTK	S2	ENSG00000007402	CACNA2D2	U3	ENSG00000205084	TMEM231	M2
ENSG00000063601	MTMR1	F2	ENSG00000062598	ELMO2	S2	ENSG00000007520	TSR3	U3	ENSG00000205129	C4orf47	M2
ENSG00000063660	GPC1	F2	ENSG00000062650	WAPL	S2	ENSG00000007545	CRAMP1	U3	ENSG00000205268	PDE7A	M2
ENSG00000063761	ADCK1	F2	ENSG00000062716	VMP1	S2	ENSG00000008283	CYB561	U3	ENSG00000205835	GMNC	M2
ENSG00000063854	HAGH	F2	ENSG00000062725	APPBP2	S2	ENSG00000008735	MAPK8IP2	U3	ENSG00000206113	CFAP99	M2
ENSG00000064012	CASP8	F2	ENSG00000063438	AHRR	S2	ENSG00000009335	UBE3C	U3	ENSG00000206530	CFAP44	M2
ENSG00000064042	LIMCH1	F2	ENSG00000063601	MTMR1	S2	ENSG00000010626	LRRC23	U3	ENSG00000213085	CFAP45	M2
ENSG00000064102	INTS13	F2	ENSG00000063660	GPC1	S2	ENSG00000010671	BTK	U3	ENSG00000213123	DYNLT2B	M2
ENSG00000064115	TM7SF3	F2	ENSG00000063761	ADCK1	S2	ENSG00000010818	HIVEP2	U3	ENSG00000213741	RPS29	M2
ENSG00000064199	SPA17	F2	ENSG00000063978	RNF4	S2	ENSG00000011332	DPF1	U3	ENSG00000213780	GTF2H4	M2
ENSG00000064225	ST3GAL6	F2	ENSG00000064042	LIMCH1	S2	ENSG00000011590	ZBTB32	U3	ENSG00000213782	DDX47	M2
ENSG00000064313	TAF2	F2	ENSG00000064102	INTS13	S2	ENSG00000013364	MVP	U3	ENSG00000214290	POU2AF3	M2
ENSG00000064393	HIPK2	F2	ENSG00000064115	TM7SF3	S2	ENSG00000013561	RNF14	U3	ENSG00000215217	C5orf49	M2
ENSG00000064419	TNPO3	F2	ENSG00000064270	ATP2C2	S2	ENSG00000018189	RUFY3	U3	ENSG00000222009	BTBD19	M2
ENSG00000064490	RFXANK	F2	ENSG00000064309	CDON	S2	ENSG00000023734	STRAP	U3	ENSG00000228672	PROB1	M2
ENSG00000064545	TMEM161A	F2	ENSG00000064313	TAF2	S2	ENSG00000025293	PHF20	U3	ENSG00000229833	PET100	M2
ENSG00000064601	CTSA	F2	ENSG00000064393	HIPK2	S2	ENSG00000026508	CD44	U3	ENSG00000235750	KIAA0040	M2
ENSG00000064666	CNN2	F2	ENSG00000064419	TNPO3	S2	ENSG00000028839	TBPL1	U3	ENSG00000236279	CLEC2L	M2
ENSG00000064692	SNCAIP	F2	ENSG00000064607	SUGP2	S2	ENSG00000029153	BMAL2	U3	ENSG00000243710	CFAP57	M2
ENSG00000064703	DDX20	F2	ENSG00000064652	SNX24	S2	ENSG00000031691	CENPQ	U3	ENSG00000244005	NFS1	M2
ENSG00000064763	FAR2	F2	ENSG00000064703	DDX20	S2	ENSG00000032444	PNPLA6	U3	ENSG00000244607	CCDC13	M2
ENSG00000064933	PMS1	F2	ENSG00000064726	BTBD1	S2	ENSG00000033170	FUT8	U3	ENSG00000250305	TRMT9B	M2
ENSG00000064961	HMG20B	F2	ENSG00000064763	FAR2	S2	ENSG00000033327	GAB2	U3	ENSG00000261652	PIERCE2	M2
ENSG00000064989	CALCRL	F2	ENSG00000064989	CALCRL	S2	ENSG00000034053	APBA2	U3	ENSG00000270765	GAS2L2	M2
ENSG00000064995	TAF11	F2	ENSG00000064995	TAF11	S2	ENSG00000034713	GABARAPL2	U3	ENSG00000272514	CFAP206	M2
ENSG00000064999	ANKS1A	F2	ENSG00000065000	AP3D1	S2	ENSG00000035141	FAM136A	U3	ENSG00000272674	PCDHB16	M2
ENSG00000065000	AP3D1	F2	ENSG00000065057	NTHL1	S2	ENSG00000035687	ADSS2	U3	ENSG00000272886	DCP1A	M2
ENSG00000065057	NTHL1	F2	ENSG00000065060	BLTP3A	S2	ENSG00000035928	RFC1	U3	ENSG00000273559	CWC25	M2
ENSG00000065135	GNAI3	F2	ENSG00000065135	GNAI3	S2	ENSG00000040531	CTNS	U3	ENSG00000277399	GPR179	M2
ENSG00000065150	IPO5	F2	ENSG00000065150	IPO5	S2	ENSG00000044459	CNTLN	U3	ENSG00000284308	C2orf81	M2
ENSG00000065243	PKN2	F2	ENSG00000065154	OAT	S2	ENSG00000048544	MRPS10	U3	ENSG00000284862	CCDC39	M2
ENSG00000065268	WDR18	F2	ENSG00000065183	WDR3	S2	ENSG00000050438	SLC4A8	U3	ENSG00000001617	SEMA3F	M4
ENSG00000065320	NTN1	F2	ENSG00000065243	PKN2	S2	ENSG00000051180	RAD51	U3	ENSG00000002919	SNX11	M4
ENSG00000065357	DGKA	F2	ENSG00000065320	NTN1	S2	ENSG00000053900	ANAPC4	U3	ENSG00000004455	AK2	M4
ENSG00000065413	ANKRD44	F2	ENSG00000065413	ANKRD44	S2	ENSG00000054356	PTPRN	U3	ENSG00000004700	RECQL	M4
ENSG00000065427	KARS1	F2	ENSG00000065526	SPEN	S2	ENSG00000055044	NOP58	U3	ENSG00000004864	SLC25A13	M4
ENSG00000065457	ADAT1	F2	ENSG00000065534	MYLK	S2	ENSG00000055130	CUL1	U3	ENSG00000004866	ST7	M4
ENSG00000065485	PDIA5	F2	ENSG00000065548	ZC3H15	S2	ENSG00000056972	TRAF3IP2	U3	ENSG00000005513	SOX8	M4
ENSG00000065491	TBC1D22B	F2	ENSG00000065559	MAP2K4	S2	ENSG00000059758	CDK17	U3	ENSG00000005893	LAMP2	M4
ENSG00000065518	NDUFB4	F2	ENSG00000065600	PACC1	S2	ENSG00000064270	ATP2C2	U3	ENSG00000006042	TMEM98	M4
ENSG00000065526	SPEN	F2	ENSG00000065609	SNAP91	S2	ENSG00000064726	BTBD1	U3	ENSG00000006453	BAIAP2L1	M4
ENSG00000065534	MYLK	F2	ENSG00000065613	SLK	S2	ENSG00000065154	OAT	U3	ENSG00000007341	ST7L	M4
ENSG00000065548	ZC3H15	F2	ENSG00000065615	CYB5R4	S2	ENSG00000065485	PDIA5	U3	ENSG00000007392	LUC7L	M4
ENSG00000065600	PACC1	F2	ENSG00000065621	GSTO2	S2	ENSG00000065518	NDUFB4	U3	ENSG00000008118	CAMK1G	M4
ENSG00000065615	CYB5R4	F2	ENSG00000065665	SEC61A2	S2	ENSG00000065548	ZC3H15	U3	ENSG00000008282	SYPL1	M4
ENSG00000065621	GSTO2	F2	ENSG00000065802	ASB1	S2	ENSG00000065989	PDE4A	U3	ENSG00000010072	SPRTN	M4
ENSG00000065665	SEC61A2	F2	ENSG00000065809	FAM107B	S2	ENSG00000067992	PDK3	U3	ENSG00000010270	STARD3NL	M4
ENSG00000065717	TLE2	F2	ENSG00000065833	ME1	S2	ENSG00000068971	PPP2R5B	U3	ENSG00000010278	CD9	M4
ENSG00000065802	ASB1	F2	ENSG00000065882	TBC1D1	S2	ENSG00000070831	CDC42	U3	ENSG00000011258	MBTD1	M4
ENSG00000065809	FAM107B	F2	ENSG00000065883	CDK13	S2	ENSG00000071575	TRIB2	U3	ENSG00000011426	ANLN	M4
ENSG00000065883	CDK13	F2	ENSG00000065923	SLC9A7	S2	ENSG00000072803	FBXW11	U3	ENSG00000012171	SEMA3B	M4
ENSG00000065970	FOXJ2	F2	ENSG00000065970	FOXJ2	S2	ENSG00000073331	ALPK1	U3	ENSG00000012983	MAP4K5	M4
ENSG00000065989	PDE4A	F2	ENSG00000066032	CTNNA2	S2	ENSG00000074319	TSG101	U3	ENSG00000013297	CLDN11	M4
ENSG00000066027	PPP2R5A	F2	ENSG00000066044	ELAVL1	S2	ENSG00000074582	BCS1L	U3	ENSG00000014123	UFL1	M4
ENSG00000066044	ELAVL1	F2	ENSG00000066056	TIE1	S2	ENSG00000074660	SCARF1	U3	ENSG00000015171	ZMYND11	M4
ENSG00000066084	DIP2B	F2	ENSG00000066084	DIP2B	S2	ENSG00000075089	ACTR6	U3	ENSG00000017427	IGF1	M4
ENSG00000066117	SMARCD1	F2	ENSG00000066117	SMARCD1	S2	ENSG00000076685	NT5C2	U3	ENSG00000019485	PRDM11	M4
ENSG00000066135	KDM4A	F2	ENSG00000066135	KDM4A	S2	ENSG00000076928	ARHGEF1	U3	ENSG00000019991	HGF	M4
ENSG00000066136	NFYC	F2	ENSG00000066230	SLC9A3	S2	ENSG00000077157	PPP1R12B	U3	ENSG00000024862	CCDC28A	M4
ENSG00000066248	NGEF	F2	ENSG00000066279	ASPM	S2	ENSG00000077254	USP33	U3	ENSG00000025434	NR1H3	M4
ENSG00000066279	ASPM	F2	ENSG00000066294	CD84	S2	ENSG00000077380	DYNC1I2	U3	ENSG00000028116	VRK2	M4
ENSG00000066294	CD84	F2	ENSG00000066382	MPPED2	S2	ENSG00000077549	CAPZB	U3	ENSG00000031691	CENPQ	M4
ENSG00000066379	POLR1H	F2	ENSG00000066422	ZBTB11	S2	ENSG00000078061	ARAF	U3	ENSG00000033170	FUT8	M4
ENSG00000066422	ZBTB11	F2	ENSG00000066427	ATXN3	S2	ENSG00000078668	VDAC3	U3	ENSG00000033327	GAB2	M4
ENSG00000066427	ATXN3	F2	ENSG00000066455	GOLGA5	S2	ENSG00000078808	SDF4	U3	ENSG00000034693	PEX3	M4
ENSG00000066557	LRRC40	F2	ENSG00000066557	LRRC40	S2	ENSG00000079950	STX7	U3	ENSG00000034713	GABARAPL2	M4
ENSG00000066583	ISOC1	F2	ENSG00000066583	ISOC1	S2	ENSG00000080824	HSP90AA1	U3	ENSG00000036549	ZZZ3	M4
ENSG00000066651	TRMT11	F2	ENSG00000066654	THUMPD1	S2	ENSG00000081154	PCNP	U3	ENSG00000040531	CTNS	M4
ENSG00000066654	THUMPD1	F2	ENSG00000066697	MSANTD3	S2	ENSG00000082516	GEMIN5	U3	ENSG00000042445	RETSAT	M4
ENSG00000066697	MSANTD3	F2	ENSG00000066735	KIF26A	S2	ENSG00000082556	OPRK1	U3	ENSG00000043591	ADRB1	M4
ENSG00000066777	ARFGEF1	F2	ENSG00000066739	ATG2B	S2	ENSG00000083123	BCKDHB	U3	ENSG00000047365	ARAP2	M4
ENSG00000066827	ZFAT	F2	ENSG00000066777	ARFGEF1	S2	ENSG00000083750	RRAGB	U3	ENSG00000049089	COL9A2	M4
ENSG00000066855	MTFR1	F2	ENSG00000066855	MTFR1	S2	ENSG00000084072	PPIE	U3	ENSG00000051108	HERPUD1	M4
ENSG00000066923	STAG3	F2	ENSG00000066926	FECH	S2	ENSG00000084733	RAB10	U3	ENSG00000051128	HOMER3	M4
ENSG00000066926	FECH	F2	ENSG00000066933	MYO9A	S2	ENSG00000085644	ZNF213	U3	ENSG00000051523	CYBA	M4
ENSG00000066933	MYO9A	F2	ENSG00000067057	PFKP	S2	ENSG00000085662	AKR1B1	U3	ENSG00000052723	SIKE1	M4
ENSG00000067064	IDI1	F2	ENSG00000067064	IDI1	S2	ENSG00000085760	MTIF2	U3	ENSG00000052749	RRP12	M4
ENSG00000067167	TRAM1	F2	ENSG00000067082	KLF6	S2	ENSG00000085831	TTC39A	U3	ENSG00000053108	FSTL4	M4
ENSG00000067177	PHKA1	F2	ENSG00000067113	PLPP1	S2	ENSG00000086061	DNAJA1	U3	ENSG00000054148	PHPT1	M4
ENSG00000067182	TNFRSF1A	F2	ENSG00000067141	NEO1	S2	ENSG00000086200	IPO11	U3	ENSG00000054690	PLEKHH1	M4
ENSG00000067191	CACNB1	F2	ENSG00000067167	TRAM1	S2	ENSG00000086598	TMED2	U3	ENSG00000056586	RC3H2	M4
ENSG00000067208	EVI5	F2	ENSG00000067182	TNFRSF1A	S2	ENSG00000086666	ZFAND6	U3	ENSG00000057704	TMCC3	M4
ENSG00000067221	STOML1	F2	ENSG00000067208	EVI5	S2	ENSG00000086712	TXLNG	U3	ENSG00000061656	SPAG4	M4
ENSG00000067225	PKM	F2	ENSG00000067248	DHX29	S2	ENSG00000086730	LAT2	U3	ENSG00000061987	MON2	M4
ENSG00000067248	DHX29	F2	ENSG00000067334	DNTTIP2	S2	ENSG00000086827	ZW10	U3	ENSG00000064490	RFXANK	M4
ENSG00000067334	DNTTIP2	F2	ENSG00000067365	METTL22	S2	ENSG00000087253	LPCAT2	U3	ENSG00000064651	SLC12A2	M4
ENSG00000067365	METTL22	F2	ENSG00000067369	TP53BP1	S2	ENSG00000088298	EDEM2	U3	ENSG00000064787	BCAS1	M4
ENSG00000067533	RRP15	F2	ENSG00000067533	RRP15	S2	ENSG00000088808	PPP1R13B	U3	ENSG00000065361	ERBB3	M4
ENSG00000067560	RHOA	F2	ENSG00000067596	DHX8	S2	ENSG00000088833	NSFL1C	U3	ENSG00000065600	PACC1	M4
ENSG00000067596	DHX8	F2	ENSG00000067606	PRKCZ	S2	ENSG00000089009	RPL6	U3	ENSG00000065675	PRKCQ	M4
ENSG00000067606	PRKCZ	F2	ENSG00000067704	IARS2	S2	ENSG00000089159	PXN	U3	ENSG00000065809	FAM107B	M4
ENSG00000067704	IARS2	F2	ENSG00000067715	SYT1	S2	ENSG00000089163	SIRT4	U3	ENSG00000066084	DIP2B	M4
ENSG00000067798	NAV3	F2	ENSG00000067840	PDZD4	S2	ENSG00000089639	GMIP	U3	ENSG00000066322	ELOVL1	M4
ENSG00000067829	IDH3G	F2	ENSG00000067842	ATP2B3	S2	ENSG00000089818	NECAP1	U3	ENSG00000066926	FECH	M4
ENSG00000067842	ATP2B3	F2	ENSG00000067900	ROCK1	S2	ENSG00000090054	SPTLC1	U3	ENSG00000068383	INPP5A	M4
ENSG00000067900	ROCK1	F2	ENSG00000067955	CBFB	S2	ENSG00000090263	MRPS33	U3	ENSG00000068885	IFT80	M4
ENSG00000067955	CBFB	F2	ENSG00000067992	PDK3	S2	ENSG00000090470	PDCD7	U3	ENSG00000070214	SLC44A1	M4
ENSG00000068001	HYAL2	F2	ENSG00000068024	HDAC4	S2	ENSG00000090621	PABPC4	U3	ENSG00000070669	ASNS	M4
ENSG00000068024	HDAC4	F2	ENSG00000068028	RASSF1	S2	ENSG00000090686	USP48	U3	ENSG00000071054	MAP4K4	M4
ENSG00000068079	IFI35	F2	ENSG00000068137	PLEKHH3	S2	ENSG00000090857	PDPR	U3	ENSG00000071991	CDH19	M4
ENSG00000068097	HEATR6	F2	ENSG00000068305	MEF2A	S2	ENSG00000091157	WDR7	U3	ENSG00000072110	ACTN1	M4
ENSG00000068120	COASY	F2	ENSG00000068308	OTUD5	S2	ENSG00000091164	TXNL1	U3	ENSG00000072133	RPS6KA6	M4
ENSG00000068137	PLEKHH3	F2	ENSG00000068323	TFE3	S2	ENSG00000091262	ABCC6	U3	ENSG00000072858	SIDT1	M4
ENSG00000068323	TFE3	F2	ENSG00000068366	ACSL4	S2	ENSG00000091527	CDV3	U3	ENSG00000073417	PDE8A	M4
ENSG00000068354	TBC1D25	F2	ENSG00000068383	INPP5A	S2	ENSG00000092020	PPP2R3C	U3	ENSG00000073921	PICALM	M4
ENSG00000068383	INPP5A	F2	ENSG00000068394	GPKOW	S2	ENSG00000092094	OSGEP	U3	ENSG00000074054	CLASP1	M4
ENSG00000068394	GPKOW	F2	ENSG00000068400	GRIPAP1	S2	ENSG00000092203	TOX4	U3	ENSG00000074201	CLNS1A	M4
ENSG00000068400	GRIPAP1	F2	ENSG00000068438	FTSJ1	S2	ENSG00000092208	GEMIN2	U3	ENSG00000074211	PPP2R2C	M4
ENSG00000068654	POLR1A	F2	ENSG00000068615	REEP1	S2	ENSG00000093217	XYLB	U3	ENSG00000075539	FRYL	M4
ENSG00000068697	LAPTM4A	F2	ENSG00000068650	ATP11A	S2	ENSG00000094841	UPRT	U3	ENSG00000075651	PLD1	M4
ENSG00000068745	IP6K2	F2	ENSG00000068654	POLR1A	S2	ENSG00000095002	MSH2	U3	ENSG00000076242	MLH1	M4
ENSG00000068878	PSME4	F2	ENSG00000068697	LAPTM4A	S2	ENSG00000095585	BLNK	U3	ENSG00000076321	KLHL20	M4
ENSG00000068885	IFT80	F2	ENSG00000068724	TTC7A	S2	ENSG00000095739	BAMBI	U3	ENSG00000076513	ANKRD13A	M4
ENSG00000068971	PPP2R5B	F2	ENSG00000068745	IP6K2	S2	ENSG00000099284	MACROH2A2	U3	ENSG00000077092	RARB	M4
ENSG00000068976	PYGM	F2	ENSG00000068796	KIF2A	S2	ENSG00000099785	MARCHF2	U3	ENSG00000077380	DYNC1I2	M4
ENSG00000069018	TRPC7	F2	ENSG00000068878	PSME4	S2	ENSG00000099942	CRKL	U3	ENSG00000077684	JADE1	M4
ENSG00000069122	ADGRF5	F2	ENSG00000068912	ERLEC1	S2	ENSG00000099960	SLC7A4	U3	ENSG00000078124	ACER3	M4
ENSG00000069275	NUCKS1	F2	ENSG00000068971	PPP2R5B	S2	ENSG00000099995	SF3A1	U3	ENSG00000078269	SYNJ2	M4
ENSG00000069424	KCNAB2	F2	ENSG00000068976	PYGM	S2	ENSG00000100027	YPEL1	U3	ENSG00000078487	ZCWPW1	M4
ENSG00000069431	ABCC9	F2	ENSG00000069018	TRPC7	S2	ENSG00000100030	MAPK1	U3	ENSG00000080224	EPHA6	M4
ENSG00000069535	MAOB	F2	ENSG00000069020	MAST4	S2	ENSG00000100109	TFIP11	U3	ENSG00000080608	PUM3	M4
ENSG00000069667	RORA	F2	ENSG00000069122	ADGRF5	S2	ENSG00000100129	EIF3L	U3	ENSG00000080815	PSEN1	M4
ENSG00000069702	TGFBR3	F2	ENSG00000069188	SDK2	S2	ENSG00000100216	TOMM22	U3	ENSG00000080819	CPOX	M4
ENSG00000069869	NEDD4	F2	ENSG00000069248	NUP133	S2	ENSG00000100241	SBF1	U3	ENSG00000080822	CLDND1	M4
ENSG00000069943	PIGB	F2	ENSG00000069275	NUCKS1	S2	ENSG00000100296	THOC5	U3	ENSG00000080854	IGSF9B	M4
ENSG00000069966	GNB5	F2	ENSG00000069329	VPS35	S2	ENSG00000100307	CBX7	U3	ENSG00000082438	COBLL1	M4
ENSG00000070010	UFD1	F2	ENSG00000069345	DNAJA2	S2	ENSG00000100316	RPL3	U3	ENSG00000082996	RNF13	M4
ENSG00000070018	LRP6	F2	ENSG00000069424	KCNAB2	S2	ENSG00000100347	SAMM50	U3	ENSG00000084764	MAPRE3	M4
ENSG00000070047	PHRF1	F2	ENSG00000069431	ABCC9	S2	ENSG00000100380	ST13	U3	ENSG00000086102	NFX1	M4
ENSG00000070061	ELP1	F2	ENSG00000069509	FUNDC1	S2	ENSG00000100401	RANGAP1	U3	ENSG00000086205	FOLH1	M4
ENSG00000070159	PTPN3	F2	ENSG00000069535	MAOB	S2	ENSG00000100462	PRMT5	U3	ENSG00000086475	SEPHS1	M4
ENSG00000070190	DAPP1	F2	ENSG00000069702	TGFBR3	S2	ENSG00000100526	CDKN3	U3	ENSG00000089053	ANAPC5	M4
ENSG00000070269	TMEM260	F2	ENSG00000069869	NEDD4	S2	ENSG00000100567	PSMA3	U3	ENSG00000090097	PCBP4	M4
ENSG00000070366	SMG6	F2	ENSG00000069943	PIGB	S2	ENSG00000100575	TIMM9	U3	ENSG00000091513	TF	M4
ENSG00000070367	EXOC5	F2	ENSG00000069956	MAPK6	S2	ENSG00000100591	AHSA1	U3	ENSG00000092010	PSME1	M4
ENSG00000070413	DGCR2	F2	ENSG00000070010	UFD1	S2	ENSG00000100632	ERH	U3	ENSG00000092094	OSGEP	M4
ENSG00000070423	RNF126	F2	ENSG00000070018	LRP6	S2	ENSG00000100650	SRSF5	U3	ENSG00000092098	RNF31	M4
ENSG00000070444	MNT	F2	ENSG00000070061	ELP1	S2	ENSG00000100836	PABPN1	U3	ENSG00000092529	CAPN3	M4
ENSG00000070495	JMJD6	F2	ENSG00000070081	NUCB2	S2	ENSG00000100949	RABGGTA	U3	ENSG00000092871	RFFL	M4
ENSG00000070501	POLB	F2	ENSG00000070087	PFN2	S2	ENSG00000101098	RIMS4	U3	ENSG00000095713	CRTAC1	M4
ENSG00000070614	NDST1	F2	ENSG00000070159	PTPN3	S2	ENSG00000101138	CSTF1	U3	ENSG00000099282	TSPAN15	M4
ENSG00000070718	AP3M2	F2	ENSG00000070182	SPTB	S2	ENSG00000101146	RAE1	U3	ENSG00000099331	MYO9B	M4
ENSG00000070761	CFAP20	F2	ENSG00000070193	FGF10	S2	ENSG00000101150	TPD52L2	U3	ENSG00000099622	CIRBP	M4
ENSG00000070778	PTPN21	F2	ENSG00000070366	SMG6	S2	ENSG00000101182	PSMA7	U3	ENSG00000100027	YPEL1	M4
ENSG00000070814	TCOF1	F2	ENSG00000070367	EXOC5	S2	ENSG00000101412	E2F1	U3	ENSG00000100065	CARD10	M4
ENSG00000070882	OSBPL3	F2	ENSG00000070413	DGCR2	S2	ENSG00000101413	RPRD1B	U3	ENSG00000100139	MICALL1	M4
ENSG00000070886	EPHA8	F2	ENSG00000070444	MNT	S2	ENSG00000101417	PXMP4	U3	ENSG00000100302	RASD2	M4
ENSG00000070950	RAD18	F2	ENSG00000070476	ZXDC	S2	ENSG00000101546	RBFA	U3	ENSG00000100490	CDKL1	M4
ENSG00000070961	ATP2B1	F2	ENSG00000070601	FRMPD1	S2	ENSG00000101557	USP14	U3	ENSG00000100505	TRIM9	M4
ENSG00000071073	MGAT4A	F2	ENSG00000070614	NDST1	S2	ENSG00000101654	RNMT	U3	ENSG00000100564	PIGH	M4
ENSG00000071127	WDR1	F2	ENSG00000070669	ASNS	S2	ENSG00000101745	ANKRD12	U3	ENSG00000100596	SPTLC2	M4
ENSG00000071189	SNX13	F2	ENSG00000070718	AP3M2	S2	ENSG00000101928	MOSPD1	U3	ENSG00000100842	EFS	M4
ENSG00000071243	ING3	F2	ENSG00000070761	CFAP20	S2	ENSG00000101940	WDR13	U3	ENSG00000101049	SGK2	M4
ENSG00000071246	VASH1	F2	ENSG00000070770	CSNK2A2	S2	ENSG00000101945	SUV39H1	U3	ENSG00000101442	ACTR5	M4
ENSG00000071462	BUD23	F2	ENSG00000070778	PTPN21	S2	ENSG00000102054	RBBP7	U3	ENSG00000101489	CELF4	M4
ENSG00000071539	TRIP13	F2	ENSG00000070785	EIF2B3	S2	ENSG00000102078	SLC25A14	U3	ENSG00000101695	RNF125	M4
ENSG00000071564	TCF3	F2	ENSG00000070831	CDC42	S2	ENSG00000102144	PGK1	U3	ENSG00000102893	PHKB	M4
ENSG00000071626	DAZAP1	F2	ENSG00000070950	RAD18	S2	ENSG00000102172	SMS	U3	ENSG00000102934	PLLP	M4
ENSG00000071655	MBD3	F2	ENSG00000070961	ATP2B1	S2	ENSG00000102349	KLF8	U3	ENSG00000102974	CTCF	M4
ENSG00000071794	HLTF	F2	ENSG00000071051	NCK2	S2	ENSG00000102359	SRPX2	U3	ENSG00000103089	FA2H	M4
ENSG00000071859	FAM50A	F2	ENSG00000071073	MGAT4A	S2	ENSG00000102383	ZDHHC15	U3	ENSG00000103264	FBXO31	M4
ENSG00000071909	MYO3B	F2	ENSG00000071127	WDR1	S2	ENSG00000102401	ARMCX3	U3	ENSG00000103381	CPPED1	M4
ENSG00000071967	CYBRD1	F2	ENSG00000071189	SNX13	S2	ENSG00000102524	TNFSF13B	U3	ENSG00000103550	KNOP1	M4
ENSG00000072062	PRKACA	F2	ENSG00000071205	ARHGAP10	S2	ENSG00000102760	RGCC	U3	ENSG00000103966	EHD4	M4
ENSG00000072071	ADGRL1	F2	ENSG00000071242	RPS6KA2	S2	ENSG00000102805	CLN5	U3	ENSG00000104332	SFRP1	M4
ENSG00000072121	ZFYVE26	F2	ENSG00000071243	ING3	S2	ENSG00000102886	GDPD3	U3	ENSG00000104825	NFKBIB	M4
ENSG00000072133	RPS6KA6	F2	ENSG00000071246	VASH1	S2	ENSG00000103043	VAC14	U3	ENSG00000104881	PPP1R13L	M4
ENSG00000072201	LNX1	F2	ENSG00000071537	SEL1L	S2	ENSG00000103257	SLC7A5	U3	ENSG00000104903	LYL1	M4
ENSG00000072274	TFRC	F2	ENSG00000071575	TRIB2	S2	ENSG00000103269	RHBDL1	U3	ENSG00000104969	SGTA	M4
ENSG00000072310	SREBF1	F2	ENSG00000071794	HLTF	S2	ENSG00000103365	GGA2	U3	ENSG00000105122	RASAL3	M4
ENSG00000072364	AFF4	F2	ENSG00000071859	FAM50A	S2	ENSG00000103429	BFAR	U3	ENSG00000105443	CYTH2	M4
ENSG00000072415	PALS1	F2	ENSG00000071909	MYO3B	S2	ENSG00000103855	CD276	U3	ENSG00000105643	ARRDC2	M4
ENSG00000072571	HMMR	F2	ENSG00000071967	CYBRD1	S2	ENSG00000104231	ZFAND1	U3	ENSG00000105656	ELL	M4
ENSG00000072609	CHFR	F2	ENSG00000072041	SLC6A15	S2	ENSG00000104320	NBN	U3	ENSG00000105695	MAG	M4
ENSG00000072736	NFATC3	F2	ENSG00000072042	RDH11	S2	ENSG00000104331	BPNT2	U3	ENSG00000105810	CDK6	M4
ENSG00000072778	ACADVL	F2	ENSG00000072062	PRKACA	S2	ENSG00000104341	LAPTM4B	U3	ENSG00000106049	HIBADH	M4
ENSG00000072786	STK10	F2	ENSG00000072133	RPS6KA6	S2	ENSG00000104381	GDAP1	U3	ENSG00000106069	CHN2	M4
ENSG00000072803	FBXW11	F2	ENSG00000072134	EPN2	S2	ENSG00000104442	ARMC1	U3	ENSG00000106244	PDAP1	M4
ENSG00000072832	CRMP1	F2	ENSG00000072135	PTPN18	S2	ENSG00000104626	ERI1	U3	ENSG00000106266	SNX8	M4
ENSG00000072849	DERL2	F2	ENSG00000072182	ASIC4	S2	ENSG00000104691	UBXN8	U3	ENSG00000106366	SERPINE1	M4
ENSG00000072858	SIDT1	F2	ENSG00000072201	LNX1	S2	ENSG00000104885	DOT1L	U3	ENSG00000106397	PLOD3	M4
ENSG00000072864	NDE1	F2	ENSG00000072210	ALDH3A2	S2	ENSG00000104897	SF3A2	U3	ENSG00000106400	ZNHIT1	M4
ENSG00000072952	IRAG1	F2	ENSG00000072274	TFRC	S2	ENSG00000104904	OAZ1	U3	ENSG00000106819	ASPN	M4
ENSG00000072954	TMEM38A	F2	ENSG00000072315	TRPC5	S2	ENSG00000104907	TRMT1	U3	ENSG00000106853	PTGR1	M4
ENSG00000073050	XRCC1	F2	ENSG00000072364	AFF4	S2	ENSG00000105053	VRK3	U3	ENSG00000106991	ENG	M4
ENSG00000073060	SCARB1	F2	ENSG00000072415	PALS1	S2	ENSG00000105193	RPS16	U3	ENSG00000107282	APBA1	M4
ENSG00000073111	MCM2	F2	ENSG00000072422	RHOBTB1	S2	ENSG00000105202	FBL	U3	ENSG00000107362	ABHD17B	M4
ENSG00000073150	PANX2	F2	ENSG00000072501	SMC1A	S2	ENSG00000105220	GPI	U3	ENSG00000107651	SEC23IP	M4
ENSG00000073169	SELENOO	F2	ENSG00000072518	MARK2	S2	ENSG00000105221	AKT2	U3	ENSG00000107672	NSMCE4A	M4
ENSG00000073331	ALPK1	F2	ENSG00000072609	CHFR	S2	ENSG00000105323	HNRNPUL1	U3	ENSG00000107731	UNC5B	M4
ENSG00000073350	LLGL2	F2	ENSG00000072657	TRHDE	S2	ENSG00000105372	RPS19	U3	ENSG00000107798	LIPA	M4
ENSG00000073578	SDHA	F2	ENSG00000072682	P4HA2	S2	ENSG00000105472	CLEC11A	U3	ENSG00000107902	LHPP	M4
ENSG00000073584	SMARCE1	F2	ENSG00000072756	TRNT1	S2	ENSG00000105520	PLPPR2	U3	ENSG00000107949	BCCIP	M4
ENSG00000073614	KDM5A	F2	ENSG00000072786	STK10	S2	ENSG00000105552	BCAT2	U3	ENSG00000108239	TBC1D12	M4
ENSG00000073670	ADAM11	F2	ENSG00000072803	FBXW11	S2	ENSG00000105556	MIER2	U3	ENSG00000108381	ASPA	M4
ENSG00000073711	PPP2R3A	F2	ENSG00000072840	EVC	S2	ENSG00000105607	GCDH	U3	ENSG00000108518	PFN1	M4
ENSG00000073712	FERMT2	F2	ENSG00000072849	DERL2	S2	ENSG00000105698	USF2	U3	ENSG00000108639	SYNGR2	M4
ENSG00000073756	PTGS2	F2	ENSG00000072858	SIDT1	S2	ENSG00000105705	SUGP1	U3	ENSG00000108651	UTP6	M4
ENSG00000073969	NSF	F2	ENSG00000072952	IRAG1	S2	ENSG00000105821	DNAJC2	U3	ENSG00000108784	NAGLU	M4
ENSG00000074054	CLASP1	F2	ENSG00000072958	AP1M1	S2	ENSG00000105993	DNAJB6	U3	ENSG00000109046	WSB1	M4
ENSG00000074071	MRPS34	F2	ENSG00000073060	SCARB1	S2	ENSG00000106052	TAX1BP1	U3	ENSG00000109089	CDR2L	M4
ENSG00000074201	CLNS1A	F2	ENSG00000073169	SELENOO	S2	ENSG00000106077	ABHD11	U3	ENSG00000109184	DCUN1D4	M4
ENSG00000074219	TEAD2	F2	ENSG00000073331	ALPK1	S2	ENSG00000106261	ZKSCAN1	U3	ENSG00000109475	RPL34	M4
ENSG00000074266	EED	F2	ENSG00000073350	LLGL2	S2	ENSG00000106290	TAF6	U3	ENSG00000109618	SEPSECS	M4
ENSG00000074317	SNCB	F2	ENSG00000073464	CLCN4	S2	ENSG00000106355	LSM5	U3	ENSG00000109686	SH3D19	M4
ENSG00000074356	NCBP3	F2	ENSG00000073578	SDHA	S2	ENSG00000106366	SERPINE1	U3	ENSG00000109819	PPARGC1A	M4
ENSG00000074410	CA12	F2	ENSG00000073584	SMARCE1	S2	ENSG00000106692	FKTN	U3	ENSG00000110492	MDK	M4
ENSG00000074582	BCS1L	F2	ENSG00000073614	KDM5A	S2	ENSG00000106723	SPIN1	U3	ENSG00000110756	HPS5	M4
ENSG00000074590	NUAK1	F2	ENSG00000073711	PPP2R3A	S2	ENSG00000107140	TESK1	U3	ENSG00000110801	PSMD9	M4
ENSG00000074603	DPP8	F2	ENSG00000073712	FERMT2	S2	ENSG00000107185	RGP1	U3	ENSG00000110921	MVK	M4
ENSG00000074660	SCARF1	F2	ENSG00000073756	PTGS2	S2	ENSG00000107263	RAPGEF1	U3	ENSG00000111186	WNT5B	M4
ENSG00000074695	LMAN1	F2	ENSG00000073803	MAP3K13	S2	ENSG00000107372	ZFAND5	U3	ENSG00000111341	MGP	M4
ENSG00000074696	HACD3	F2	ENSG00000073849	ST6GAL1	S2	ENSG00000107537	PHYH	U3	ENSG00000111581	NUP107	M4
ENSG00000074755	ZZEF1	F2	ENSG00000073910	FRY	S2	ENSG00000107742	SPOCK2	U3	ENSG00000111605	CPSF6	M4
ENSG00000074842	MYDGF	F2	ENSG00000073921	PICALM	S2	ENSG00000107960	STN1	U3	ENSG00000112053	SLC26A8	M4
ENSG00000074855	ANO8	F2	ENSG00000073969	NSF	S2	ENSG00000108010	GLRX3	U3	ENSG00000112137	PHACTR1	M4
ENSG00000075043	KCNQ2	F2	ENSG00000074054	CLASP1	S2	ENSG00000108107	RPL28	U3	ENSG00000112210	RAB23	M4
ENSG00000075089	ACTR6	F2	ENSG00000074071	MRPS34	S2	ENSG00000108231	LGI1	U3	ENSG00000112242	E2F3	M4
ENSG00000075131	TIPIN	F2	ENSG00000074181	NOTCH3	S2	ENSG00000108298	RPL19	U3	ENSG00000112425	EPM2A	M4
ENSG00000075142	SRI	F2	ENSG00000074201	CLNS1A	S2	ENSG00000108309	RUNDC3A	U3	ENSG00000112473	SLC39A7	M4
ENSG00000075151	EIF4G3	F2	ENSG00000074211	PPP2R2C	S2	ENSG00000108423	TUBD1	U3	ENSG00000112561	TFEB	M4
ENSG00000075188	NUP37	F2	ENSG00000074219	TEAD2	S2	ENSG00000108528	SLC25A11	U3	ENSG00000112562	SMOC2	M4
ENSG00000075223	SEMA3C	F2	ENSG00000074319	TSG101	S2	ENSG00000108587	GOSR1	U3	ENSG00000112799	LY86	M4
ENSG00000075234	TTC38	F2	ENSG00000074356	NCBP3	S2	ENSG00000108590	MED31	U3	ENSG00000112893	MAN2A1	M4
ENSG00000075239	ACAT1	F2	ENSG00000074370	ATP2A3	S2	ENSG00000108622	ICAM2	U3	ENSG00000113448	PDE4D	M4
ENSG00000075275	CELSR1	F2	ENSG00000074416	MGLL	S2	ENSG00000108666	C17orf75	U3	ENSG00000113838	TBCCD1	M4
ENSG00000075303	SLC25A40	F2	ENSG00000074590	NUAK1	S2	ENSG00000108840	HDAC5	U3	ENSG00000114107	CEP70	M4
ENSG00000075336	TIMM21	F2	ENSG00000074603	DPP8	S2	ENSG00000109066	TMEM104	U3	ENSG00000114200	BCHE	M4
ENSG00000075340	ADD2	F2	ENSG00000074660	SCARF1	S2	ENSG00000109133	TMEM33	U3	ENSG00000114541	FRMD4B	M4
ENSG00000075413	MARK3	F2	ENSG00000074695	LMAN1	S2	ENSG00000109270	LAMTOR3	U3	ENSG00000114745	GORASP1	M4
ENSG00000075415	SLC25A3	F2	ENSG00000074696	HACD3	S2	ENSG00000109332	UBE2D3	U3	ENSG00000114942	EEF1B2	M4
ENSG00000075420	FNDC3B	F2	ENSG00000074706	IPCEF1	S2	ENSG00000109445	ZNF330	U3	ENSG00000115128	SF3B6	M4
ENSG00000075426	FOSL2	F2	ENSG00000074755	ZZEF1	S2	ENSG00000109685	NSD2	U3	ENSG00000115207	GTF3C2	M4
ENSG00000075429	CACNG5	F2	ENSG00000074855	ANO8	S2	ENSG00000109762	SNX25	U3	ENSG00000115211	EIF2B4	M4
ENSG00000075461	CACNG4	F2	ENSG00000074964	ARHGEF10L	S2	ENSG00000109832	DDX25	U3	ENSG00000115392	FANCL	M4
ENSG00000075539	FRYL	F2	ENSG00000075035	WSCD2	S2	ENSG00000109919	MTCH2	U3	ENSG00000115425	PECR	M4
ENSG00000075568	TMEM131	F2	ENSG00000075043	KCNQ2	S2	ENSG00000109971	HSPA8	U3	ENSG00000115459	ELMOD3	M4
ENSG00000075618	FSCN1	F2	ENSG00000075089	ACTR6	S2	ENSG00000110108	TMEM109	U3	ENSG00000115808	STRN	M4
ENSG00000075643	MOCOS	F2	ENSG00000075131	TIPIN	S2	ENSG00000110400	NECTIN1	U3	ENSG00000116001	TIA1	M4
ENSG00000075651	PLD1	F2	ENSG00000075142	SRI	S2	ENSG00000110700	RPS13	U3	ENSG00000116574	RHOU	M4
ENSG00000075711	DLG1	F2	ENSG00000075151	EIF4G3	S2	ENSG00000110888	CAPRIN2	U3	ENSG00000116830	TTF2	M4
ENSG00000075785	RAB7A	F2	ENSG00000075188	NUP37	S2	ENSG00000110921	MVK	U3	ENSG00000116863	ADPRS	M4
ENSG00000075856	SART3	F2	ENSG00000075213	SEMA3A	S2	ENSG00000110958	PTGES3	U3	ENSG00000117000	RLF	M4
ENSG00000075884	ARHGAP15	F2	ENSG00000075223	SEMA3C	S2	ENSG00000111247	RAD51AP1	U3	ENSG00000117054	ACADM	M4
ENSG00000075914	EXOSC7	F2	ENSG00000075234	TTC38	S2	ENSG00000111269	CREBL2	U3	ENSG00000117362	APH1A	M4
ENSG00000075975	MKRN2	F2	ENSG00000075239	ACAT1	S2	ENSG00000111596	CNOT2	U3	ENSG00000117394	SLC2A1	M4
ENSG00000076043	REXO2	F2	ENSG00000075240	GRAMD4	S2	ENSG00000111639	MRPL51	U3	ENSG00000117450	PRDX1	M4
ENSG00000076053	RBM7	F2	ENSG00000075275	CELSR1	S2	ENSG00000111667	USP5	U3	ENSG00000117614	SYF2	M4
ENSG00000076067	RBMS2	F2	ENSG00000075292	ZNF638	S2	ENSG00000111678	C12orf57	U3	ENSG00000117676	RPS6KA1	M4
ENSG00000076201	PTPN23	F2	ENSG00000075303	SLC25A40	S2	ENSG00000111726	CMAS	U3	ENSG00000117862	TXNDC12	M4
ENSG00000076242	MLH1	F2	ENSG00000075336	TIMM21	S2	ENSG00000111737	RAB35	U3	ENSG00000118298	CA14	M4
ENSG00000076248	UNG	F2	ENSG00000075340	ADD2	S2	ENSG00000111843	TMEM14C	U3	ENSG00000118322	ATP10B	M4
ENSG00000076321	KLHL20	F2	ENSG00000075391	RASAL2	S2	ENSG00000111850	SMIM8	U3	ENSG00000118503	TNFAIP3	M4
ENSG00000076351	SLC46A1	F2	ENSG00000075413	MARK3	S2	ENSG00000112079	STK38	U3	ENSG00000118523	CCN2	M4
ENSG00000076382	SPAG5	F2	ENSG00000075420	FNDC3B	S2	ENSG00000112149	CD83	U3	ENSG00000119041	GTF3C3	M4
ENSG00000076604	TRAF4	F2	ENSG00000075461	CACNG4	S2	ENSG00000112357	PEX7	U3	ENSG00000119121	TRPM6	M4
ENSG00000076641	PAG1	F2	ENSG00000075539	FRYL	S2	ENSG00000112394	SLC16A10	U3	ENSG00000119655	NPC2	M4
ENSG00000076685	NT5C2	F2	ENSG00000075568	TMEM131	S2	ENSG00000112592	TBP	U3	ENSG00000119684	MLH3	M4
ENSG00000076826	CAMSAP3	F2	ENSG00000075651	PLD1	S2	ENSG00000112655	PTK7	U3	ENSG00000119699	TGFB3	M4
ENSG00000076864	RAP1GAP	F2	ENSG00000075711	DLG1	S2	ENSG00000112685	EXOC2	U3	ENSG00000119906	SLF2	M4
ENSG00000076924	XAB2	F2	ENSG00000075785	RAB7A	S2	ENSG00000112981	NME5	U3	ENSG00000119922	IFIT2	M4
ENSG00000076984	MAP2K7	F2	ENSG00000075790	BCAP29	S2	ENSG00000113100	CDH9	U3	ENSG00000119929	CUTC	M4
ENSG00000077044	DGKD	F2	ENSG00000075856	SART3	S2	ENSG00000113273	ARSB	U3	ENSG00000120162	MOB3B	M4
ENSG00000077063	CTTNBP2	F2	ENSG00000075884	ARHGAP15	S2	ENSG00000113384	GOLPH3	U3	ENSG00000120370	GORAB	M4
ENSG00000077080	ACTL6B	F2	ENSG00000075945	KIFAP3	S2	ENSG00000113391	FAM172A	U3	ENSG00000120656	TAF12	M4
ENSG00000077150	NFKB2	F2	ENSG00000075975	MKRN2	S2	ENSG00000113552	GNPDA1	U3	ENSG00000120697	ALG5	M4
ENSG00000077232	DNAJC10	F2	ENSG00000076003	MCM6	S2	ENSG00000113648	MACROH2A1	U3	ENSG00000120756	PLS1	M4
ENSG00000077235	GTF3C1	F2	ENSG00000076053	RBM7	S2	ENSG00000113761	ZNF346	U3	ENSG00000120800	UTP20	M4
ENSG00000077238	IL4R	F2	ENSG00000076067	RBMS2	S2	ENSG00000113811	SELENOK	U3	ENSG00000120837	NFYB	M4
ENSG00000077279	DCX	F2	ENSG00000076108	BAZ2A	S2	ENSG00000113971	NPHP3	U3	ENSG00000120913	PDLIM2	M4
ENSG00000077312	SNRPA	F2	ENSG00000076242	MLH1	S2	ENSG00000114098	ARMC8	U3	ENSG00000121064	SCPEP1	M4
ENSG00000077348	EXOSC5	F2	ENSG00000076321	KLHL20	S2	ENSG00000114416	FXR1	U3	ENSG00000121068	TBX2	M4
ENSG00000077380	DYNC1I2	F2	ENSG00000076344	RGS11	S2	ENSG00000114573	ATP6V1A	U3	ENSG00000121274	TENT4B	M4
ENSG00000077420	APBB1IP	F2	ENSG00000076356	PLXNA2	S2	ENSG00000114631	PODXL2	U3	ENSG00000121897	LIAS	M4
ENSG00000077458	FAM76B	F2	ENSG00000076554	TPD52	S2	ENSG00000114686	MRPL3	U3	ENSG00000121966	CXCR4	M4
ENSG00000077463	SIRT6	F2	ENSG00000076641	PAG1	S2	ENSG00000114738	MAPKAPK3	U3	ENSG00000122122	SASH3	M4
ENSG00000077522	ACTN2	F2	ENSG00000076650	GPATCH1	S2	ENSG00000115084	SLC35F5	U3	ENSG00000122299	ZC3H7A	M4
ENSG00000077549	CAPZB	F2	ENSG00000076685	NT5C2	S2	ENSG00000115091	ACTR3	U3	ENSG00000122367	LDB3	M4
ENSG00000077585	GPR137B	F2	ENSG00000076716	GPC4	S2	ENSG00000115128	SF3B6	U3	ENSG00000122435	TRMT13	M4
ENSG00000077616	NAALAD2	F2	ENSG00000077044	DGKD	S2	ENSG00000115271	GCA	U3	ENSG00000122545	SEPTIN7	M4
ENSG00000077684	JADE1	F2	ENSG00000077063	CTTNBP2	S2	ENSG00000115421	PAPOLG	U3	ENSG00000122707	RECK	M4
ENSG00000077721	UBE2A	F2	ENSG00000077092	RARB	S2	ENSG00000115446	UNC50	U3	ENSG00000122783	CYREN	M4
ENSG00000077942	FBLN1	F2	ENSG00000077097	TOP2B	S2	ENSG00000115540	MOB4	U3	ENSG00000123243	ITIH5	M4
ENSG00000078018	MAP2	F2	ENSG00000077147	TM9SF3	S2	ENSG00000115738	ID2	U3	ENSG00000123552	USP45	M4
ENSG00000078053	AMPH	F2	ENSG00000077157	PPP1R12B	S2	ENSG00000115758	ODC1	U3	ENSG00000123560	PLP1	M4
ENSG00000078061	ARAF	F2	ENSG00000077232	DNAJC10	S2	ENSG00000115841	RMDN2	U3	ENSG00000123689	G0S2	M4
ENSG00000078070	MCCC1	F2	ENSG00000077235	GTF3C1	S2	ENSG00000115944	COX7A2L	U3	ENSG00000123836	PFKFB2	M4
ENSG00000078098	FAP	F2	ENSG00000077238	IL4R	S2	ENSG00000115998	C2orf42	U3	ENSG00000124374	PAIP2B	M4
ENSG00000078114	NEBL	F2	ENSG00000077254	USP33	S2	ENSG00000116005	PCYOX1	U3	ENSG00000124772	CPNE5	M4
ENSG00000078124	ACER3	F2	ENSG00000077264	PAK3	S2	ENSG00000116030	SUMO1	U3	ENSG00000124788	ATXN1	M4
ENSG00000078140	UBE2K	F2	ENSG00000077279	DCX	S2	ENSG00000116120	FARSB	U3	ENSG00000124813	RUNX2	M4
ENSG00000078142	PIK3C3	F2	ENSG00000077380	DYNC1I2	S2	ENSG00000116171	SCP2	U3	ENSG00000124920	MYRF	M4
ENSG00000078177	N4BP2	F2	ENSG00000077420	APBB1IP	S2	ENSG00000116254	CHD5	U3	ENSG00000125247	TMTC4	M4
ENSG00000078237	TIGAR	F2	ENSG00000077458	FAM76B	S2	ENSG00000116478	HDAC1	U3	ENSG00000125503	PPP1R12C	M4
ENSG00000078246	TULP3	F2	ENSG00000077522	ACTN2	S2	ENSG00000116809	ZBTB17	U3	ENSG00000125703	ATG4C	M4
ENSG00000078295	ADCY2	F2	ENSG00000077585	GPR137B	S2	ENSG00000116830	TTF2	U3	ENSG00000125734	GPR108	M4
ENSG00000078304	PPP2R5C	F2	ENSG00000077616	NAALAD2	S2	ENSG00000116954	RRAGC	U3	ENSG00000125746	EML2	M4
ENSG00000078328	RBFOX1	F2	ENSG00000077684	JADE1	S2	ENSG00000117154	IGSF21	U3	ENSG00000125817	CENPB	M4
ENSG00000078401	EDN1	F2	ENSG00000077721	UBE2A	S2	ENSG00000117281	CD160	U3	ENSG00000125834	STK35	M4
ENSG00000078403	MLLT10	F2	ENSG00000078018	MAP2	S2	ENSG00000117410	ATP6V0B	U3	ENSG00000125845	BMP2	M4
ENSG00000078487	ZCWPW1	F2	ENSG00000078043	PIAS2	S2	ENSG00000117505	DR1	U3	ENSG00000125966	MMP24	M4
ENSG00000078674	PCM1	F2	ENSG00000078053	AMPH	S2	ENSG00000117528	ABCD3	U3	ENSG00000125968	ID1	M4
ENSG00000078687	TNRC6C	F2	ENSG00000078061	ARAF	S2	ENSG00000117598	PLPPR5	U3	ENSG00000125991	ERGIC3	M4
ENSG00000078699	CBFA2T2	F2	ENSG00000078098	FAP	S2	ENSG00000117632	STMN1	U3	ENSG00000126458	RRAS	M4
ENSG00000078747	ITCH	F2	ENSG00000078114	NEBL	S2	ENSG00000117906	RCN2	U3	ENSG00000126803	HSPA2	M4
ENSG00000078795	PKD2L2	F2	ENSG00000078124	ACER3	S2	ENSG00000117984	CTSD	U3	ENSG00000126822	PLEKHG3	M4
ENSG00000078808	SDF4	F2	ENSG00000078140	UBE2K	S2	ENSG00000118096	IFT46	U3	ENSG00000126860	EVI2A	M4
ENSG00000078814	MYH7B	F2	ENSG00000078142	PIK3C3	S2	ENSG00000118160	SLC8A2	U3	ENSG00000126878	AIF1L	M4
ENSG00000078902	TOLLIP	F2	ENSG00000078177	N4BP2	S2	ENSG00000118181	RPS25	U3	ENSG00000127564	PKMYT1	M4
ENSG00000079102	RUNX1T1	F2	ENSG00000078237	TIGAR	S2	ENSG00000118363	SPCS2	U3	ENSG00000127720	METTL25	M4
ENSG00000079134	THOC1	F2	ENSG00000078295	ADCY2	S2	ENSG00000118369	USP35	U3	ENSG00000127951	FGL2	M4
ENSG00000079150	FKBP7	F2	ENSG00000078304	PPP2R5C	S2	ENSG00000118564	FBXL5	U3	ENSG00000127980	PEX1	M4
ENSG00000079156	OSBPL6	F2	ENSG00000078369	GNB1	S2	ENSG00000118680	MYL12B	U3	ENSG00000128052	KDR	M4
ENSG00000079215	SLC1A3	F2	ENSG00000078549	ADCYAP1R1	S2	ENSG00000118816	CCNI	U3	ENSG00000128242	GAL3ST1	M4
ENSG00000079257	LXN	F2	ENSG00000078596	ITM2A	S2	ENSG00000118855	MFSD1	U3	ENSG00000128274	A4GALT	M4
ENSG00000079335	CDC14A	F2	ENSG00000078618	NRDC	S2	ENSG00000119280	C1orf198	U3	ENSG00000128283	CDC42EP1	M4
ENSG00000079387	SENP1	F2	ENSG00000078668	VDAC3	S2	ENSG00000119402	FBXW2	U3	ENSG00000128311	TST	M4
ENSG00000079459	FDFT1	F2	ENSG00000078674	PCM1	S2	ENSG00000119446	RBM18	U3	ENSG00000128789	PSMG2	M4
ENSG00000079462	PAFAH1B3	F2	ENSG00000078687	TNRC6C	S2	ENSG00000119523	ALG2	U3	ENSG00000128805	ARHGAP22	M4
ENSG00000079482	OPHN1	F2	ENSG00000078699	CBFA2T2	S2	ENSG00000119705	SLIRP	U3	ENSG00000128928	IVD	M4
ENSG00000079616	KIF22	F2	ENSG00000078747	ITCH	S2	ENSG00000119801	YPEL5	U3	ENSG00000129250	KIF1C	M4
ENSG00000079691	CARMIL1	F2	ENSG00000078795	PKD2L2	S2	ENSG00000119820	YIPF4	U3	ENSG00000129292	PHF20L1	M4
ENSG00000079785	DDX1	F2	ENSG00000078808	SDF4	S2	ENSG00000119878	CRIPT	U3	ENSG00000129472	RAB2B	M4
ENSG00000079805	DNM2	F2	ENSG00000078814	MYH7B	S2	ENSG00000120526	NUDCD1	U3	ENSG00000129515	SNX6	M4
ENSG00000079819	EPB41L2	F2	ENSG00000078902	TOLLIP	S2	ENSG00000120533	ENY2	U3	ENSG00000129757	CDKN1C	M4
ENSG00000079931	MOXD1	F2	ENSG00000079134	THOC1	S2	ENSG00000120656	TAF12	U3	ENSG00000130150	MOSPD2	M4
ENSG00000079999	KEAP1	F2	ENSG00000079156	OSBPL6	S2	ENSG00000120686	UFM1	U3	ENSG00000130227	XPO7	M4
ENSG00000080189	SLC35C2	F2	ENSG00000079215	SLC1A3	S2	ENSG00000120805	ARL1	U3	ENSG00000130309	COLGALT1	M4
ENSG00000080200	CRYBG3	F2	ENSG00000079246	XRCC5	S2	ENSG00000120899	PTK2B	U3	ENSG00000130349	MTRES1	M4
ENSG00000080298	RFX3	F2	ENSG00000079313	REXO1	S2	ENSG00000120925	RNF170	U3	ENSG00000130429	ARPC1B	M4
ENSG00000080345	RIF1	F2	ENSG00000079332	SAR1A	S2	ENSG00000120963	ZNF706	U3	ENSG00000130475	FCHO1	M4
ENSG00000080371	RAB21	F2	ENSG00000079335	CDC14A	S2	ENSG00000121281	ADCY7	U3	ENSG00000130962	PRRG1	M4
ENSG00000080493	SLC4A4	F2	ENSG00000079387	SENP1	S2	ENSG00000121621	KIF18A	U3	ENSG00000131043	AAR2	M4
ENSG00000080503	SMARCA2	F2	ENSG00000079432	CIC	S2	ENSG00000121671	CRY2	U3	ENSG00000131386	GALNT15	M4
ENSG00000080546	SESN1	F2	ENSG00000079459	FDFT1	S2	ENSG00000121964	GTDC1	U3	ENSG00000131408	NR1H2	M4
ENSG00000080561	MID2	F2	ENSG00000079482	OPHN1	S2	ENSG00000122068	FYTTD1	U3	ENSG00000131831	RAI2	M4
ENSG00000080573	COL5A3	F2	ENSG00000079739	PGM1	S2	ENSG00000122126	OCRL	U3	ENSG00000131979	GCH1	M4
ENSG00000080608	PUM3	F2	ENSG00000079785	DDX1	S2	ENSG00000122376	SHLD2	U3	ENSG00000132680	KHDC4	M4
ENSG00000080709	KCNN2	F2	ENSG00000079819	EPB41L2	S2	ENSG00000122378	PRXL2A	U3	ENSG00000132702	HAPLN2	M4
ENSG00000080815	PSEN1	F2	ENSG00000079931	MOXD1	S2	ENSG00000122565	CBX3	U3	ENSG00000132953	XPO4	M4
ENSG00000080822	CLDND1	F2	ENSG00000079950	STX7	S2	ENSG00000122641	INHBA	U3	ENSG00000133794	BMAL1	M4
ENSG00000080839	RBL1	F2	ENSG00000079999	KEAP1	S2	ENSG00000122678	POLM	U3	ENSG00000133835	HSD17B4	M4
ENSG00000080845	DLGAP4	F2	ENSG00000080189	SLC35C2	S2	ENSG00000122912	SLC25A16	U3	ENSG00000133958	UNC79	M4
ENSG00000080854	IGSF9B	F2	ENSG00000080224	EPHA6	S2	ENSG00000122952	ZWINT	U3	ENSG00000134285	FKBP11	M4
ENSG00000081014	AP4E1	F2	ENSG00000080298	RFX3	S2	ENSG00000123297	TSFM	U3	ENSG00000134490	TMEM241	M4
ENSG00000081019	RSBN1	F2	ENSG00000080345	RIF1	S2	ENSG00000123415	SMUG1	U3	ENSG00000134825	TMEM258	M4
ENSG00000081148	IMPG2	F2	ENSG00000080371	RAB21	S2	ENSG00000123416	TUBA1B	U3	ENSG00000134851	TMEM165	M4
ENSG00000081154	PCNP	F2	ENSG00000080493	SLC4A4	S2	ENSG00000123472	ATPAF1	U3	ENSG00000134852	CLOCK	M4
ENSG00000081177	EXD2	F2	ENSG00000080503	SMARCA2	S2	ENSG00000123552	USP45	U3	ENSG00000135049	AGTPBP1	M4
ENSG00000081181	ARG2	F2	ENSG00000080546	SESN1	S2	ENSG00000123609	NMI	U3	ENSG00000135111	TBX3	M4
ENSG00000081189	MEF2C	F2	ENSG00000080561	MID2	S2	ENSG00000123992	DNPEP	U3	ENSG00000135148	TRAFD1	M4
ENSG00000081307	UBA5	F2	ENSG00000080608	PUM3	S2	ENSG00000124151	NCOA3	U3	ENSG00000135334	AKIRIN2	M4
ENSG00000081692	JMJD4	F2	ENSG00000080802	CNOT4	S2	ENSG00000124194	GDAP1L1	U3	ENSG00000135362	PRR5L	M4
ENSG00000081721	DUSP12	F2	ENSG00000080819	CPOX	S2	ENSG00000124209	RAB22A	U3	ENSG00000135473	PAN2	M4
ENSG00000081760	AACS	F2	ENSG00000080822	CLDND1	S2	ENSG00000124222	STX16	U3	ENSG00000135678	CPM	M4
ENSG00000081791	DELE1	F2	ENSG00000080823	MOK	S2	ENSG00000124535	WRNIP1	U3	ENSG00000135679	MDM2	M4
ENSG00000081853	PCDHGA2	F2	ENSG00000080824	HSP90AA1	S2	ENSG00000124587	PEX6	U3	ENSG00000135698	MPHOSPH6	M4
ENSG00000081923	ATP8B1	F2	ENSG00000080839	RBL1	S2	ENSG00000124596	OARD1	U3	ENSG00000135720	DYNC1LI2	M4
ENSG00000081985	IL12RB2	F2	ENSG00000081014	AP4E1	S2	ENSG00000124767	GLO1	U3	ENSG00000135845	PIGC	M4
ENSG00000082014	SMARCD3	F2	ENSG00000081019	RSBN1	S2	ENSG00000124802	EEF1E1	U3	ENSG00000135905	DOCK10	M4
ENSG00000082068	WDR70	F2	ENSG00000081026	MAGI3	S2	ENSG00000125166	GOT2	U3	ENSG00000135953	MFSD9	M4
ENSG00000082074	FYB1	F2	ENSG00000081087	OSTM1	S2	ENSG00000125170	DOK4	U3	ENSG00000136231	IGF2BP3	M4
ENSG00000082146	STRADB	F2	ENSG00000081138	CDH7	S2	ENSG00000125430	HS3ST3B1	U3	ENSG00000136541	ERMN	M4
ENSG00000082175	PGR	F2	ENSG00000081148	IMPG2	S2	ENSG00000125458	NT5C	U3	ENSG00000136754	ABI1	M4
ENSG00000082213	C5orf22	F2	ENSG00000081154	PCNP	S2	ENSG00000125534	PPDPF	U3	ENSG00000136867	SLC31A2	M4
ENSG00000082258	CCNT2	F2	ENSG00000081181	ARG2	S2	ENSG00000125637	PSD4	U3	ENSG00000136940	PDCL	M4
ENSG00000082269	FAM135A	F2	ENSG00000081189	MEF2C	S2	ENSG00000125652	ALKBH7	U3	ENSG00000136960	ENPP2	M4
ENSG00000082293	COL19A1	F2	ENSG00000081237	PTPRC	S2	ENSG00000125691	RPL23	U3	ENSG00000137274	BPHL	M4
ENSG00000082438	COBLL1	F2	ENSG00000081307	UBA5	S2	ENSG00000125743	SNRPD2	U3	ENSG00000137513	NARS2	M4
ENSG00000082458	DLG3	F2	ENSG00000081320	STK17B	S2	ENSG00000125775	SDCBP2	U3	ENSG00000137824	RMDN3	M4
ENSG00000082497	SERTAD4	F2	ENSG00000081692	JMJD4	S2	ENSG00000125877	ITPA	U3	ENSG00000137941	TTLL7	M4
ENSG00000082556	OPRK1	F2	ENSG00000081721	DUSP12	S2	ENSG00000125971	DYNLRB1	U3	ENSG00000138035	PNPT1	M4
ENSG00000082641	NFE2L1	F2	ENSG00000081760	AACS	S2	ENSG00000125977	EIF2S2	U3	ENSG00000138085	ATRAID	M4
ENSG00000082701	GSK3B	F2	ENSG00000081803	CADPS2	S2	ENSG00000126001	CEP250	U3	ENSG00000138092	CENPO	M4
ENSG00000082898	XPO1	F2	ENSG00000081853	PCDHGA2	S2	ENSG00000126215	XRCC3	U3	ENSG00000138182	KIF20B	M4
ENSG00000083067	TRPM3	F2	ENSG00000081870	HSPB11	S2	ENSG00000126247	CAPNS1	U3	ENSG00000138386	NAB1	M4
ENSG00000083093	PALB2	F2	ENSG00000081923	ATP8B1	S2	ENSG00000126267	COX6B1	U3	ENSG00000138593	SECISBP2L	M4
ENSG00000083097	DOP1A	F2	ENSG00000082074	FYB1	S2	ENSG00000126351	THRA	U3	ENSG00000138614	INTS14	M4
ENSG00000083099	LYRM2	F2	ENSG00000082146	STRADB	S2	ENSG00000126500	FLRT1	U3	ENSG00000138835	RGS3	M4
ENSG00000083123	BCKDHB	F2	ENSG00000082153	BZW1	S2	ENSG00000126945	HNRNPH2	U3	ENSG00000139318	DUSP6	M4
ENSG00000083168	KAT6A	F2	ENSG00000082175	PGR	S2	ENSG00000127184	COX7C	U3	ENSG00000139370	SLC15A4	M4
ENSG00000083223	TUT7	F2	ENSG00000082212	ME2	S2	ENSG00000127561	SYNGR3	U3	ENSG00000139433	GLTP	M4
ENSG00000083290	ULK2	F2	ENSG00000082213	C5orf22	S2	ENSG00000128059	PPAT	U3	ENSG00000139438	FAM222A	M4
ENSG00000083312	TNPO1	F2	ENSG00000082258	CCNT2	S2	ENSG00000128159	TUBGCP6	U3	ENSG00000139496	NUP58	M4
ENSG00000083520	DIS3	F2	ENSG00000082269	FAM135A	S2	ENSG00000128973	CLN6	U3	ENSG00000139629	GALNT6	M4
ENSG00000083535	PIBF1	F2	ENSG00000082293	COL19A1	S2	ENSG00000129083	COPB1	U3	ENSG00000139737	SLAIN1	M4
ENSG00000083544	TDRD3	F2	ENSG00000082458	DLG3	S2	ENSG00000129197	RPAIN	U3	ENSG00000140391	TSPAN3	M4
ENSG00000083635	NUFIP1	F2	ENSG00000082482	KCNK2	S2	ENSG00000129347	KRI1	U3	ENSG00000140406	TLNRD1	M4
ENSG00000083642	PDS5B	F2	ENSG00000082497	SERTAD4	S2	ENSG00000129518	EAPP	U3	ENSG00000140479	PCSK6	M4
ENSG00000083750	RRAGB	F2	ENSG00000082516	GEMIN5	S2	ENSG00000129596	CDO1	U3	ENSG00000140526	ABHD2	M4
ENSG00000083845	RPS5	F2	ENSG00000082641	NFE2L1	S2	ENSG00000130158	DOCK6	U3	ENSG00000140543	DET1	M4
ENSG00000083857	FAT1	F2	ENSG00000082701	GSK3B	S2	ENSG00000130227	XPO7	U3	ENSG00000140600	SH3GL3	M4
ENSG00000084070	SMAP2	F2	ENSG00000082805	ERC1	S2	ENSG00000130244	FAM98C	U3	ENSG00000141013	GAS8	M4
ENSG00000084072	PPIE	F2	ENSG00000082898	XPO1	S2	ENSG00000130255	RPL36	U3	ENSG00000141076	UTP4	M4
ENSG00000084073	ZMPSTE24	F2	ENSG00000083093	PALB2	S2	ENSG00000130312	MRPL34	U3	ENSG00000141127	PRPSAP2	M4
ENSG00000084090	STARD7	F2	ENSG00000083097	DOP1A	S2	ENSG00000130449	ZSWIM6	U3	ENSG00000141338	ABCA8	M4
ENSG00000084092	NOA1	F2	ENSG00000083099	LYRM2	S2	ENSG00000130477	UNC13A	U3	ENSG00000141458	NPC1	M4
ENSG00000084093	REST	F2	ENSG00000083168	KAT6A	S2	ENSG00000130520	LSM4	U3	ENSG00000141540	TTYH2	M4
ENSG00000084444	FAM234B	F2	ENSG00000083223	TUT7	S2	ENSG00000130702	LAMA5	U3	ENSG00000141873	SLC39A3	M4
ENSG00000084623	EIF3I	F2	ENSG00000083290	ULK2	S2	ENSG00000130749	ZC3H4	U3	ENSG00000142065	ZFP14	M4
ENSG00000084636	COL16A1	F2	ENSG00000083312	TNPO1	S2	ENSG00000131238	PPT1	U3	ENSG00000142102	PGGHG	M4
ENSG00000084676	NCOA1	F2	ENSG00000083520	DIS3	S2	ENSG00000131446	MGAT1	U3	ENSG00000143303	METTL25B	M4
ENSG00000084710	EFR3B	F2	ENSG00000083535	PIBF1	S2	ENSG00000131469	RPL27	U3	ENSG00000143418	CERS2	M4
ENSG00000084731	KIF3C	F2	ENSG00000083544	TDRD3	S2	ENSG00000131473	ACLY	U3	ENSG00000143507	DUSP10	M4
ENSG00000084733	RAB10	F2	ENSG00000083635	NUFIP1	S2	ENSG00000131788	PIAS3	U3	ENSG00000143858	SYT2	M4
ENSG00000084754	HADHA	F2	ENSG00000083642	PDS5B	S2	ENSG00000131791	PRKAB2	U3	ENSG00000143971	ETAA1	M4
ENSG00000084764	MAPRE3	F2	ENSG00000083720	OXCT1	S2	ENSG00000131931	THAP1	U3	ENSG00000143977	SNRPG	M4
ENSG00000085185	BCORL1	F2	ENSG00000083750	RRAGB	S2	ENSG00000131979	GCH1	U3	ENSG00000143995	MEIS1	M4
ENSG00000085224	ATRX	F2	ENSG00000083799	CYLD	S2	ENSG00000132341	RAN	U3	ENSG00000144036	EXOC6B	M4
ENSG00000085274	MYNN	F2	ENSG00000083857	FAT1	S2	ENSG00000132361	CLUH	U3	ENSG00000144228	SPOPL	M4
ENSG00000085377	PREP	F2	ENSG00000083896	YTHDC1	S2	ENSG00000132423	COQ3	U3	ENSG00000144283	PKP4	M4
ENSG00000085382	HACE1	F2	ENSG00000083937	CHMP2B	S2	ENSG00000132436	FIGNL1	U3	ENSG00000144460	NYAP2	M4
ENSG00000085415	SEH1L	F2	ENSG00000084070	SMAP2	S2	ENSG00000132471	WBP2	U3	ENSG00000144815	NXPE3	M4
ENSG00000085449	WDFY1	F2	ENSG00000084072	PPIE	S2	ENSG00000132604	TERF2	U3	ENSG00000144843	ADPRH	M4
ENSG00000085465	OVGP1	F2	ENSG00000084073	ZMPSTE24	S2	ENSG00000132912	DCTN4	U3	ENSG00000144848	ATG3	M4
ENSG00000085491	SLC25A24	F2	ENSG00000084090	STARD7	S2	ENSG00000133250	ZNF414	U3	ENSG00000145391	SETD7	M4
ENSG00000085511	MAP3K4	F2	ENSG00000084092	NOA1	S2	ENSG00000133641	C12orf29	U3	ENSG00000145423	SFRP2	M4
ENSG00000085644	ZNF213	F2	ENSG00000084093	REST	S2	ENSG00000134001	EIF2S1	U3	ENSG00000145425	RPS3A	M4
ENSG00000085662	AKR1B1	F2	ENSG00000084112	SSH1	S2	ENSG00000134030	CTIF	U3	ENSG00000145687	SSBP2	M4
ENSG00000085719	CPNE3	F2	ENSG00000084234	APLP2	S2	ENSG00000134108	ARL8B	U3	ENSG00000145715	RASA1	M4
ENSG00000085733	CTTN	F2	ENSG00000084444	FAM234B	S2	ENSG00000134245	WNT2B	U3	ENSG00000145734	BDP1	M4
ENSG00000085760	MTIF2	F2	ENSG00000084652	TXLNA	S2	ENSG00000134308	YWHAQ	U3	ENSG00000145868	FBXO38	M4
ENSG00000085788	DDHD2	F2	ENSG00000084676	NCOA1	S2	ENSG00000134318	ROCK2	U3	ENSG00000145934	TENM2	M4
ENSG00000085831	TTC39A	F2	ENSG00000084710	EFR3B	S2	ENSG00000134508	CABLES1	U3	ENSG00000146122	DAAM2	M4
ENSG00000085872	CHERP	F2	ENSG00000084731	KIF3C	S2	ENSG00000134874	DZIP1	U3	ENSG00000146285	SCML4	M4
ENSG00000085978	ATG16L1	F2	ENSG00000084733	RAB10	S2	ENSG00000135018	UBQLN1	U3	ENSG00000146360	GPR6	M4
ENSG00000085982	USP40	F2	ENSG00000084754	HADHA	S2	ENSG00000135040	NAA35	U3	ENSG00000146457	WTAP	M4
ENSG00000085998	POMGNT1	F2	ENSG00000085185	BCORL1	S2	ENSG00000135045	C9orf40	U3	ENSG00000146676	PURB	M4
ENSG00000085999	RAD54L	F2	ENSG00000085224	ATRX	S2	ENSG00000135108	FBXO21	U3	ENSG00000146834	MEPCE	M4
ENSG00000086061	DNAJA1	F2	ENSG00000085274	MYNN	S2	ENSG00000135249	RINT1	U3	ENSG00000147459	DOCK5	M4
ENSG00000086062	B4GALT1	F2	ENSG00000085276	MECOM	S2	ENSG00000135316	SYNCRIP	U3	ENSG00000147488	ST18	M4
ENSG00000086102	NFX1	F2	ENSG00000085365	SCAMP1	S2	ENSG00000135392	DNAJC14	U3	ENSG00000147536	GINS4	M4
ENSG00000086189	DIMT1	F2	ENSG00000085377	PREP	S2	ENSG00000135486	HNRNPA1	U3	ENSG00000148187	MRRF	M4
ENSG00000086289	EPDR1	F2	ENSG00000085382	HACE1	S2	ENSG00000135596	MICAL1	U3	ENSG00000148218	ALAD	M4
ENSG00000086475	SEPHS1	F2	ENSG00000085415	SEH1L	S2	ENSG00000135643	KCNMB4	U3	ENSG00000148297	MED22	M4
ENSG00000086504	MRPL28	F2	ENSG00000085433	WDR47	S2	ENSG00000135723	FHOD1	U3	ENSG00000148303	RPL7A	M4
ENSG00000086589	RBM22	F2	ENSG00000085465	OVGP1	S2	ENSG00000135744	AGT	U3	ENSG00000148826	NKX6-2	M4
ENSG00000086598	TMED2	F2	ENSG00000085491	SLC25A24	S2	ENSG00000135900	MRPL44	U3	ENSG00000149187	CELF1	M4
ENSG00000086619	ERO1B	F2	ENSG00000085511	MAP3K4	S2	ENSG00000135973	GPR45	U3	ENSG00000149557	FEZ1	M4
ENSG00000086666	ZFAND6	F2	ENSG00000085644	ZNF213	S2	ENSG00000136100	VPS36	U3	ENSG00000149633	KIAA1755	M4
ENSG00000086712	TXLNG	F2	ENSG00000085719	CPNE3	S2	ENSG00000136122	BORA	U3	ENSG00000150510	FAM124A	M4
ENSG00000086730	LAT2	F2	ENSG00000085721	RRN3	S2	ENSG00000136153	LMO7	U3	ENSG00000150764	DIXDC1	M4
ENSG00000086758	HUWE1	F2	ENSG00000085733	CTTN	S2	ENSG00000136274	NACAD	U3	ENSG00000150867	PIP4K2A	M4
ENSG00000086827	ZW10	F2	ENSG00000085760	MTIF2	S2	ENSG00000136521	NDUFB5	U3	ENSG00000151062	CACNA2D4	M4
ENSG00000086848	ALG9	F2	ENSG00000085788	DDHD2	S2	ENSG00000136636	KCTD3	U3	ENSG00000151552	QDPR	M4
ENSG00000087077	TRIP6	F2	ENSG00000085832	EPS15	S2	ENSG00000136738	STAM	U3	ENSG00000151572	ANO4	M4
ENSG00000087085	ACHE	F2	ENSG00000085978	ATG16L1	S2	ENSG00000136758	YME1L1	U3	ENSG00000151617	EDNRA	M4
ENSG00000087087	SRRT	F2	ENSG00000086015	MAST2	S2	ENSG00000136928	GABBR2	U3	ENSG00000151692	RNF144A	M4
ENSG00000087088	BAX	F2	ENSG00000086061	DNAJA1	S2	ENSG00000136940	PDCL	U3	ENSG00000151726	ACSL1	M4
ENSG00000087111	PIGS	F2	ENSG00000086065	CHMP5	S2	ENSG00000137054	POLR1E	U3	ENSG00000151876	FBXO4	M4
ENSG00000087157	PGS1	F2	ENSG00000086102	NFX1	S2	ENSG00000137154	RPS6	U3	ENSG00000152240	HAUS1	M4
ENSG00000087191	PSMC5	F2	ENSG00000086189	DIMT1	S2	ENSG00000137216	TMEM63B	U3	ENSG00000152270	PDE3B	M4
ENSG00000087206	UIMC1	F2	ENSG00000086200	IPO11	S2	ENSG00000137312	FLOT1	U3	ENSG00000152413	HOMER1	M4
ENSG00000087253	LPCAT2	F2	ENSG00000086205	FOLH1	S2	ENSG00000137343	ATAT1	U3	ENSG00000152422	XRCC4	M4
ENSG00000087263	OGFOD1	F2	ENSG00000086232	EIF2AK1	S2	ENSG00000137364	TPMT	U3	ENSG00000152527	PLEKHH2	M4
ENSG00000087269	NOP14	F2	ENSG00000086289	EPDR1	S2	ENSG00000137726	FXYD6	U3	ENSG00000152689	RASGRP3	M4
ENSG00000087274	ADD1	F2	ENSG00000086300	SNX10	S2	ENSG00000137770	CTDSPL2	U3	ENSG00000152767	FARP1	M4
ENSG00000087302	RTRAF	F2	ENSG00000086475	SEPHS1	S2	ENSG00000137824	RMDN3	U3	ENSG00000152954	NRSN1	M4
ENSG00000087365	SF3B2	F2	ENSG00000086504	MRPL28	S2	ENSG00000138002	IFT172	U3	ENSG00000153253	SCN3A	M4
ENSG00000087448	KLHL42	F2	ENSG00000086544	ITPKC	S2	ENSG00000138032	PPM1B	U3	ENSG00000153560	UBP1	M4
ENSG00000087494	PTHLH	F2	ENSG00000086589	RBM22	S2	ENSG00000138035	PNPT1	U3	ENSG00000154124	OTULIN	M4
ENSG00000087586	AURKA	F2	ENSG00000086598	TMED2	S2	ENSG00000138138	ATAD1	U3	ENSG00000154328	NEIL2	M4
ENSG00000087884	AAMDC	F2	ENSG00000086619	ERO1B	S2	ENSG00000138190	EXOC6	U3	ENSG00000154493	C10orf90	M4
ENSG00000087903	RFX2	F2	ENSG00000086666	ZFAND6	S2	ENSG00000138279	ANXA7	U3	ENSG00000154642	C21orf91	M4
ENSG00000088035	ALG6	F2	ENSG00000086730	LAT2	S2	ENSG00000138286	FAM149B1	U3	ENSG00000154678	PDE1C	M4
ENSG00000088038	CNOT3	F2	ENSG00000086758	HUWE1	S2	ENSG00000138495	COX17	U3	ENSG00000154945	ANKRD40	M4
ENSG00000088179	PTPN4	F2	ENSG00000086827	ZW10	S2	ENSG00000138621	PPCDC	U3	ENSG00000155330	C16orf87	M4
ENSG00000088247	KHSRP	F2	ENSG00000086848	ALG9	S2	ENSG00000138622	HCN4	U3	ENSG00000155621	C9orf85	M4
ENSG00000088256	GNA11	F2	ENSG00000087008	ACOX3	S2	ENSG00000138629	UBL7	U3	ENSG00000155629	PIK3AP1	M4
ENSG00000088280	ASAP3	F2	ENSG00000087053	MTMR2	S2	ENSG00000138757	G3BP2	U3	ENSG00000155729	KCTD18	M4
ENSG00000088298	EDEM2	F2	ENSG00000087095	NLK	S2	ENSG00000138829	FBN2	U3	ENSG00000155897	ADCY8	M4
ENSG00000088325	TPX2	F2	ENSG00000087152	ATXN7L3	S2	ENSG00000138834	MAPK8IP3	U3	ENSG00000155957	TMBIM4	M4
ENSG00000088387	DOCK9	F2	ENSG00000087206	UIMC1	S2	ENSG00000138867	GUCD1	U3	ENSG00000156482	RPL30	M4
ENSG00000088448	ANKRD10	F2	ENSG00000087245	MMP2	S2	ENSG00000138964	PARVG	U3	ENSG00000156603	MED19	M4
ENSG00000088451	TGDS	F2	ENSG00000087263	OGFOD1	S2	ENSG00000139116	KIF21A	U3	ENSG00000156795	NTAQ1	M4
ENSG00000088538	DOCK3	F2	ENSG00000087269	NOP14	S2	ENSG00000139182	CLSTN3	U3	ENSG00000156958	GALK2	M4
ENSG00000088543	C3orf18	F2	ENSG00000087274	ADD1	S2	ENSG00000139233	LLPH	U3	ENSG00000157240	FZD1	M4
ENSG00000088682	COQ9	F2	ENSG00000087299	L2HGDH	S2	ENSG00000139372	TDG	U3	ENSG00000157353	FCSK	M4
ENSG00000088727	KIF9	F2	ENSG00000087301	TXNDC16	S2	ENSG00000139514	SLC7A1	U3	ENSG00000157388	CACNA1D	M4
ENSG00000088766	CRLS1	F2	ENSG00000087302	RTRAF	S2	ENSG00000139546	TARBP2	U3	ENSG00000157693	TMEM268	M4
ENSG00000088808	PPP1R13B	F2	ENSG00000087365	SF3B2	S2	ENSG00000139637	MYG1	U3	ENSG00000157766	ACAN	M4
ENSG00000088833	NSFL1C	F2	ENSG00000087470	DNM1L	S2	ENSG00000139684	ESD	U3	ENSG00000157911	PEX10	M4
ENSG00000088854	DNAAF9	F2	ENSG00000087494	PTHLH	S2	ENSG00000139719	VPS33A	U3	ENSG00000157978	LDLRAP1	M4
ENSG00000088881	EBF4	F2	ENSG00000087495	PHACTR3	S2	ENSG00000139734	DIAPH3	U3	ENSG00000158019	BABAM2	M4
ENSG00000088930	XRN2	F2	ENSG00000087502	ERGIC2	S2	ENSG00000139946	PELI2	U3	ENSG00000158352	SHROOM4	M4
ENSG00000089006	SNX5	F2	ENSG00000087586	AURKA	S2	ENSG00000139998	RAB15	U3	ENSG00000158859	ADAMTS4	M4
ENSG00000089009	RPL6	F2	ENSG00000087842	PIR	S2	ENSG00000140367	UBE2Q2	U3	ENSG00000159200	RCAN1	M4
ENSG00000089048	ESF1	F2	ENSG00000088035	ALG6	S2	ENSG00000140382	HMG20A	U3	ENSG00000159210	SNF8	M4
ENSG00000089053	ANAPC5	F2	ENSG00000088179	PTPN4	S2	ENSG00000140471	LINS1	U3	ENSG00000159256	MORC3	M4
ENSG00000089057	SLC23A2	F2	ENSG00000088205	DDX18	S2	ENSG00000140564	FURIN	U3	ENSG00000159346	ADIPOR1	M4
ENSG00000089091	DZANK1	F2	ENSG00000088256	GNA11	S2	ENSG00000140612	SEC11A	U3	ENSG00000159899	NPR2	M4
ENSG00000089094	KDM2B	F2	ENSG00000088367	EPB41L1	S2	ENSG00000140905	GCSH	U3	ENSG00000160200	CBS	M4
ENSG00000089101	CFAP61	F2	ENSG00000088387	DOCK9	S2	ENSG00000140988	RPS2	U3	ENSG00000160213	CSTB	M4
ENSG00000089123	TASP1	F2	ENSG00000088448	ANKRD10	S2	ENSG00000141040	ZNF287	U3	ENSG00000160219	GAB3	M4
ENSG00000089154	GCN1	F2	ENSG00000088538	DOCK3	S2	ENSG00000141098	GFOD2	U3	ENSG00000160285	LSS	M4
ENSG00000089163	SIRT4	F2	ENSG00000088727	KIF9	S2	ENSG00000141428	C18orf21	U3	ENSG00000160310	PRMT2	M4
ENSG00000089169	RPH3A	F2	ENSG00000088766	CRLS1	S2	ENSG00000141577	CEP131	U3	ENSG00000160679	CHTOP	M4
ENSG00000089195	TRMT6	F2	ENSG00000088808	PPP1R13B	S2	ENSG00000141699	RETREG3	U3	ENSG00000160781	PAQR6	M4
ENSG00000089199	CHGB	F2	ENSG00000088812	ATRN	S2	ENSG00000141837	CACNA1A	U3	ENSG00000161298	ZNF382	M4
ENSG00000089234	BRAP	F2	ENSG00000088854	DNAAF9	S2	ENSG00000142082	SIRT3	U3	ENSG00000161791	FMNL3	M4
ENSG00000089248	ERP29	F2	ENSG00000088899	LZTS3	S2	ENSG00000142303	ADAMTS10	U3	ENSG00000162607	USP1	M4
ENSG00000089486	CDIP1	F2	ENSG00000088930	XRN2	S2	ENSG00000142534	RPS11	U3	ENSG00000162976	SLC66A3	M4
ENSG00000089682	RBM41	F2	ENSG00000088970	KIZ	S2	ENSG00000142627	EPHA2	U3	ENSG00000163050	COQ8A	M4
ENSG00000089693	MLF2	F2	ENSG00000089006	SNX5	S2	ENSG00000142669	SH3BGRL3	U3	ENSG00000163072	NOSTRIN	M4
ENSG00000089775	ZBTB25	F2	ENSG00000089041	P2RX7	S2	ENSG00000142676	RPL11	U3	ENSG00000163154	TNFAIP8L2	M4
ENSG00000089820	ARHGAP4	F2	ENSG00000089048	ESF1	S2	ENSG00000142864	SERBP1	U3	ENSG00000163219	ARHGAP25	M4
ENSG00000089847	ANKRD24	F2	ENSG00000089050	RBBP9	S2	ENSG00000142875	PRKACB	U3	ENSG00000163235	TGFA	M4
ENSG00000089876	DHX32	F2	ENSG00000089053	ANAPC5	S2	ENSG00000142937	RPS8	U3	ENSG00000163359	COL6A3	M4
ENSG00000089902	RCOR1	F2	ENSG00000089057	SLC23A2	S2	ENSG00000143106	PSMA5	U3	ENSG00000163393	SLC22A15	M4
ENSG00000089916	GPATCH2L	F2	ENSG00000089063	TMEM230	S2	ENSG00000143158	MPC2	U3	ENSG00000163453	IGFBP7	M4
ENSG00000090006	LTBP4	F2	ENSG00000089091	DZANK1	S2	ENSG00000143171	RXRG	U3	ENSG00000163637	PRICKLE2	M4
ENSG00000090013	BLVRB	F2	ENSG00000089094	KDM2B	S2	ENSG00000143183	TMCO1	U3	ENSG00000163697	APBB2	M4
ENSG00000090020	SLC9A1	F2	ENSG00000089101	CFAP61	S2	ENSG00000143207	COP1	U3	ENSG00000163755	HPS3	M4
ENSG00000090060	PAPOLA	F2	ENSG00000089123	TASP1	S2	ENSG00000143319	ISG20L2	U3	ENSG00000163867	ZMYM6	M4
ENSG00000090061	CCNK	F2	ENSG00000089154	GCN1	S2	ENSG00000143369	ECM1	U3	ENSG00000163931	TKT	M4
ENSG00000090097	PCBP4	F2	ENSG00000089169	RPH3A	S2	ENSG00000143373	ZNF687	U3	ENSG00000164124	TMEM144	M4
ENSG00000090238	YPEL3	F2	ENSG00000089195	TRMT6	S2	ENSG00000143457	GOLPH3L	U3	ENSG00000164161	HHIP	M4
ENSG00000090263	MRPS33	F2	ENSG00000089234	BRAP	S2	ENSG00000143543	JTB	U3	ENSG00000164168	TMEM184C	M4
ENSG00000090266	NDUFB2	F2	ENSG00000089250	NOS1	S2	ENSG00000143553	SNAPIN	U3	ENSG00000164176	EDIL3	M4
ENSG00000090273	NUDC	F2	ENSG00000089280	FUS	S2	ENSG00000143641	GALNT2	U3	ENSG00000164323	CFAP97	M4
ENSG00000090316	MAEA	F2	ENSG00000089472	HEPH	S2	ENSG00000143742	SRP9	U3	ENSG00000164342	TLR3	M4
ENSG00000090372	STRN4	F2	ENSG00000089558	KCNH4	S2	ENSG00000143793	C1orf35	U3	ENSG00000164366	CCDC127	M4
ENSG00000090376	IRAK3	F2	ENSG00000089597	GANAB	S2	ENSG00000143811	PYCR2	U3	ENSG00000164403	SHROOM1	M4
ENSG00000090432	MUL1	F2	ENSG00000089682	RBM41	S2	ENSG00000143819	EPHX1	U3	ENSG00000164463	CREBRF	M4
ENSG00000090447	TFAP4	F2	ENSG00000089723	OTUB2	S2	ENSG00000143867	OSR1	U3	ENSG00000164659	ELAPOR2	M4
ENSG00000090470	PDCD7	F2	ENSG00000089737	DDX24	S2	ENSG00000143977	SNRPG	U3	ENSG00000164867	NOS3	M4
ENSG00000090487	SPG21	F2	ENSG00000089775	ZBTB25	S2	ENSG00000144021	CIAO1	U3	ENSG00000165006	UBAP1	M4
ENSG00000090520	DNAJB11	F2	ENSG00000089818	NECAP1	S2	ENSG00000144029	MRPS5	U3	ENSG00000165186	PTCHD1	M4
ENSG00000090534	THPO	F2	ENSG00000089876	DHX32	S2	ENSG00000144320	LNPK	U3	ENSG00000165410	CFL2	M4
ENSG00000090539	CHRD	F2	ENSG00000089902	RCOR1	S2	ENSG00000144339	TMEFF2	U3	ENSG00000165476	REEP3	M4
ENSG00000090565	RAB11FIP3	F2	ENSG00000089916	GPATCH2L	S2	ENSG00000144362	PHOSPHO2	U3	ENSG00000165566	AMER2	M4
ENSG00000090621	PABPC4	F2	ENSG00000090060	PAPOLA	S2	ENSG00000144381	HSPD1	U3	ENSG00000165675	ENOX2	M4
ENSG00000090661	CERS4	F2	ENSG00000090061	CCNK	S2	ENSG00000144589	STK11IP	U3	ENSG00000166086	JAM3	M4
ENSG00000090674	MCOLN1	F2	ENSG00000090266	NDUFB2	S2	ENSG00000144711	IQSEC1	U3	ENSG00000166091	CMTM5	M4
ENSG00000090686	USP48	F2	ENSG00000090372	STRN4	S2	ENSG00000145041	DCAF1	U3	ENSG00000166140	ZFYVE19	M4
ENSG00000090776	EFNB1	F2	ENSG00000090376	IRAK3	S2	ENSG00000145198	VWA5B2	U3	ENSG00000166387	PPFIBP2	M4
ENSG00000090857	PDPR	F2	ENSG00000090470	PDCD7	S2	ENSG00000145375	SPATA5	U3	ENSG00000166428	PLD4	M4
ENSG00000090861	AARS1	F2	ENSG00000090487	SPG21	S2	ENSG00000145425	RPS3A	U3	ENSG00000166478	ZNF143	M4
ENSG00000090889	KIF4A	F2	ENSG00000090530	P3H2	S2	ENSG00000145439	CBR4	U3	ENSG00000166484	MAPK7	M4
ENSG00000090905	TNRC6A	F2	ENSG00000090565	RAB11FIP3	S2	ENSG00000146083	RNF44	U3	ENSG00000166548	TK2	M4
ENSG00000090971	NAT14	F2	ENSG00000090615	GOLGA3	S2	ENSG00000146192	FGD2	U3	ENSG00000166710	B2M	M4
ENSG00000090989	EXOC1	F2	ENSG00000090621	PABPC4	S2	ENSG00000146426	TIAM2	U3	ENSG00000166750	SLFN5	M4
ENSG00000091009	RBM27	F2	ENSG00000090661	CERS4	S2	ENSG00000146457	WTAP	U3	ENSG00000166923	GREM1	M4
ENSG00000091039	OSBPL8	F2	ENSG00000090686	USP48	S2	ENSG00000146587	RBAK	U3	ENSG00000167123	CERCAM	M4
ENSG00000091129	NRCAM	F2	ENSG00000090776	EFNB1	S2	ENSG00000146909	NOM1	U3	ENSG00000167186	COQ7	M4
ENSG00000091136	LAMB1	F2	ENSG00000090863	GLG1	S2	ENSG00000147140	NONO	U3	ENSG00000167257	RNF214	M4
ENSG00000091137	SLC26A4	F2	ENSG00000090989	EXOC1	S2	ENSG00000147604	RPL7	U3	ENSG00000167384	ZNF180	M4
ENSG00000091140	DLD	F2	ENSG00000091009	RBM27	S2	ENSG00000147654	EBAG9	U3	ENSG00000167635	ZNF146	M4
ENSG00000091164	TXNL1	F2	ENSG00000091039	OSBPL8	S2	ENSG00000147669	POLR2K	U3	ENSG00000167641	PPP1R14A	M4
ENSG00000091262	ABCC6	F2	ENSG00000091127	PUS7	S2	ENSG00000148082	SHC3	U3	ENSG00000167685	ZNF444	M4
ENSG00000091436	MAP3K20	F2	ENSG00000091129	NRCAM	S2	ENSG00000148110	MFSD14B	U3	ENSG00000167740	CYB5D2	M4
ENSG00000091483	FH	F2	ENSG00000091136	LAMB1	S2	ENSG00000148303	RPL7A	U3	ENSG00000167987	VPS37C	M4
ENSG00000091542	ALKBH5	F2	ENSG00000091137	SLC26A4	S2	ENSG00000148337	CIZ1	U3	ENSG00000168040	FADD	M4
ENSG00000091640	SPAG7	F2	ENSG00000091140	DLD	S2	ENSG00000148343	MIGA2	U3	ENSG00000168071	CCDC88B	M4
ENSG00000091651	ORC6	F2	ENSG00000091157	WDR7	S2	ENSG00000148384	INPP5E	U3	ENSG00000168140	VASN	M4
ENSG00000091656	ZFHX4	F2	ENSG00000091164	TXNL1	S2	ENSG00000148444	COMMD3	U3	ENSG00000168228	ZCCHC4	M4
ENSG00000091664	SLC17A6	F2	ENSG00000091262	ABCC6	S2	ENSG00000148481	MINDY3	U3	ENSG00000168234	TTC39C	M4
ENSG00000091732	ZC3HC1	F2	ENSG00000091317	CMTM6	S2	ENSG00000148719	DNAJB12	U3	ENSG00000168297	PXK	M4
ENSG00000091831	ESR1	F2	ENSG00000091409	ITGA6	S2	ENSG00000148985	PGAP2	U3	ENSG00000168314	MOBP	M4
ENSG00000091879	ANGPT2	F2	ENSG00000091436	MAP3K20	S2	ENSG00000149179	CSTPP1	U3	ENSG00000168411	RFWD3	M4
ENSG00000091947	TMEM101	F2	ENSG00000091483	FH	S2	ENSG00000149196	HIKESHI	U3	ENSG00000168556	ING2	M4
ENSG00000091986	CCDC80	F2	ENSG00000091490	SEL1L3	S2	ENSG00000149231	CCDC82	U3	ENSG00000168807	SNTB2	M4
ENSG00000092010	PSME1	F2	ENSG00000091527	CDV3	S2	ENSG00000149313	AASDHPPT	U3	ENSG00000168884	TNIP2	M4
ENSG00000092020	PPP2R3C	F2	ENSG00000091542	ALKBH5	S2	ENSG00000149428	HYOU1	U3	ENSG00000169047	IRS1	M4
ENSG00000092036	HAUS4	F2	ENSG00000091622	PITPNM3	S2	ENSG00000149474	KAT14	U3	ENSG00000169189	NSMCE1	M4
ENSG00000092094	OSGEP	F2	ENSG00000091651	ORC6	S2	ENSG00000149806	FAU	U3	ENSG00000169223	LMAN2	M4
ENSG00000092096	SLC22A17	F2	ENSG00000091656	ZFHX4	S2	ENSG00000149932	TMEM219	U3	ENSG00000169247	SH3TC2	M4
ENSG00000092098	RNF31	F2	ENSG00000091831	ESR1	S2	ENSG00000150433	TMEM218	U3	ENSG00000169398	PTK2	M4
ENSG00000092108	SCFD1	F2	ENSG00000091844	RGS17	S2	ENSG00000150456	EEF1AKMT1	U3	ENSG00000169504	CLIC4	M4
ENSG00000092140	G2E3	F2	ENSG00000091972	CD200	S2	ENSG00000150776	NKAPD1	U3	ENSG00000169508	GPR183	M4
ENSG00000092201	SUPT16H	F2	ENSG00000091986	CCDC80	S2	ENSG00000150961	SEC24D	U3	ENSG00000169550	MUC15	M4
ENSG00000092203	TOX4	F2	ENSG00000092020	PPP2R3C	S2	ENSG00000150991	UBC	U3	ENSG00000169554	ZEB2	M4
ENSG00000092330	TINF2	F2	ENSG00000092036	HAUS4	S2	ENSG00000151062	CACNA2D4	U3	ENSG00000169562	GJB1	M4
ENSG00000092439	TRPM7	F2	ENSG00000092054	MYH7	S2	ENSG00000151117	TMEM86A	U3	ENSG00000169564	PCBP1	M4
ENSG00000092445	TYRO3	F2	ENSG00000092068	SLC7A8	S2	ENSG00000151164	RAD9B	U3	ENSG00000169696	ASPSCR1	M4
ENSG00000092470	WDR76	F2	ENSG00000092108	SCFD1	S2	ENSG00000151176	PLBD2	U3	ENSG00000169908	TM4SF1	M4
ENSG00000092607	TBX15	F2	ENSG00000092140	G2E3	S2	ENSG00000151247	EIF4E	U3	ENSG00000170153	RNF150	M4
ENSG00000092621	PHGDH	F2	ENSG00000092148	HECTD1	S2	ENSG00000151304	SRFBP1	U3	ENSG00000170234	PWWP2A	M4
ENSG00000092847	AGO1	F2	ENSG00000092200	RPGRIP1	S2	ENSG00000151366	NDUFC2	U3	ENSG00000170242	USP47	M4
ENSG00000092931	MFSD11	F2	ENSG00000092201	SUPT16H	S2	ENSG00000151422	FER	U3	ENSG00000170412	GPRC5C	M4
ENSG00000092969	TGFB2	F2	ENSG00000092208	GEMIN2	S2	ENSG00000151470	C4orf33	U3	ENSG00000170456	DENND5B	M4
ENSG00000092978	GPATCH2	F2	ENSG00000092439	TRPM7	S2	ENSG00000151502	VPS26B	U3	ENSG00000170537	TMC7	M4
ENSG00000093010	COMT	F2	ENSG00000092445	TYRO3	S2	ENSG00000151553	FHIP2A	U3	ENSG00000170624	SGCD	M4
ENSG00000093167	LRRFIP2	F2	ENSG00000092470	WDR76	S2	ENSG00000152492	CCDC50	U3	ENSG00000170775	GPR37	M4
ENSG00000093183	SEC22C	F2	ENSG00000092529	CAPN3	S2	ENSG00000152684	PELO	U3	ENSG00000170802	FOXN2	M4
ENSG00000093217	XYLB	F2	ENSG00000092531	SNAP23	S2	ENSG00000152784	PRDM8	U3	ENSG00000170876	TMEM43	M4
ENSG00000094631	HDAC6	F2	ENSG00000092847	AGO1	S2	ENSG00000153130	SCOC	U3	ENSG00000171307	ZDHHC16	M4
ENSG00000094880	CDC23	F2	ENSG00000092969	TGFB2	S2	ENSG00000153574	RPIA	U3	ENSG00000171385	KCND3	M4
ENSG00000094914	AAAS	F2	ENSG00000092978	GPATCH2	S2	ENSG00000153714	LURAP1L	U3	ENSG00000171388	APLN	M4
ENSG00000094963	FMO2	F2	ENSG00000093010	COMT	S2	ENSG00000153786	ZDHHC7	U3	ENSG00000171421	MRPL36	M4
ENSG00000094975	SUCO	F2	ENSG00000093144	ECHDC1	S2	ENSG00000154096	THY1	U3	ENSG00000171443	ZNF524	M4
ENSG00000095059	DHPS	F2	ENSG00000093167	LRRFIP2	S2	ENSG00000154127	UBASH3B	U3	ENSG00000171492	LRRC8D	M4
ENSG00000095203	EPB41L4B	F2	ENSG00000093183	SEC22C	S2	ENSG00000154134	ROBO3	U3	ENSG00000171735	CAMTA1	M4
ENSG00000095303	PTGS1	F2	ENSG00000094841	UPRT	S2	ENSG00000154447	SH3RF1	U3	ENSG00000171823	FBXL14	M4
ENSG00000095319	NUP188	F2	ENSG00000094880	CDC23	S2	ENSG00000154914	USP43	U3	ENSG00000171877	FRMD5	M4
ENSG00000095370	SH2D3C	F2	ENSG00000094916	CBX5	S2	ENSG00000155008	APOOL	U3	ENSG00000171953	ATPAF2	M4
ENSG00000095380	NANS	F2	ENSG00000094963	FMO2	S2	ENSG00000155093	PTPRN2	U3	ENSG00000172005	MAL	M4
ENSG00000095397	WHRN	F2	ENSG00000094975	SUCO	S2	ENSG00000155096	AZIN1	U3	ENSG00000172053	QARS1	M4
ENSG00000095485	CWF19L1	F2	ENSG00000095002	MSH2	S2	ENSG00000155329	ZCCHC10	U3	ENSG00000172403	SYNPO2	M4
ENSG00000095539	SEMA4G	F2	ENSG00000095015	MAP3K1	S2	ENSG00000155330	C16orf87	U3	ENSG00000172508	CARNS1	M4
ENSG00000095564	BTAF1	F2	ENSG00000095059	DHPS	S2	ENSG00000155621	C9orf85	U3	ENSG00000172548	NIPAL4	M4
ENSG00000095574	IKZF5	F2	ENSG00000095139	ARCN1	S2	ENSG00000155636	RBM45	U3	ENSG00000172725	CORO1B	M4
ENSG00000095713	CRTAC1	F2	ENSG00000095203	EPB41L4B	S2	ENSG00000155961	RAB39B	U3	ENSG00000172995	ARPP21	M4
ENSG00000095787	WAC	F2	ENSG00000095261	PSMD5	S2	ENSG00000155975	VPS37A	U3	ENSG00000173253	DMRT2	M4
ENSG00000095906	NUBP2	F2	ENSG00000095303	PTGS1	S2	ENSG00000156026	MCU	U3	ENSG00000173327	MAP3K11	M4
ENSG00000095951	HIVEP1	F2	ENSG00000095321	CRAT	S2	ENSG00000156471	PTDSS1	U3	ENSG00000173786	CNP	M4
ENSG00000095970	TREM2	F2	ENSG00000095485	CWF19L1	S2	ENSG00000156709	AIFM1	U3	ENSG00000173826	KCNH6	M4
ENSG00000096063	SRPK1	F2	ENSG00000095564	BTAF1	S2	ENSG00000156787	TBC1D31	U3	ENSG00000173992	CCS	M4
ENSG00000096070	BRPF3	F2	ENSG00000095574	IKZF5	S2	ENSG00000156795	NTAQ1	U3	ENSG00000174473	GALNTL6	M4
ENSG00000096080	MRPS18A	F2	ENSG00000095637	SORBS1	S2	ENSG00000156853	ZNF689	U3	ENSG00000174607	UGT8	M4
ENSG00000096092	TMEM14A	F2	ENSG00000095787	WAC	S2	ENSG00000156875	MFSD14A	U3	ENSG00000174744	BRMS1	M4
ENSG00000096093	EFHC1	F2	ENSG00000095951	HIVEP1	S2	ENSG00000156958	GALK2	U3	ENSG00000174807	CD248	M4
ENSG00000096384	HSP90AB1	F2	ENSG00000096060	FKBP5	S2	ENSG00000157005	SST	U3	ENSG00000174839	DENND6A	M4
ENSG00000096717	SIRT1	F2	ENSG00000096070	BRPF3	S2	ENSG00000157404	KIT	U3	ENSG00000174944	P2RY14	M4
ENSG00000096872	IFT74	F2	ENSG00000096092	TMEM14A	S2	ENSG00000157502	PWWP3B	U3	ENSG00000175110	MRPS22	M4
ENSG00000096968	JAK2	F2	ENSG00000096093	EFHC1	S2	ENSG00000157538	VPS26C	U3	ENSG00000175305	CCNE2	M4
ENSG00000097021	ACOT7	F2	ENSG00000096433	ITPR3	S2	ENSG00000157593	SLC35B2	U3	ENSG00000175414	ARL10	M4
ENSG00000097033	SH3GLB1	F2	ENSG00000096717	SIRT1	S2	ENSG00000157625	TAB3	U3	ENSG00000175595	ERCC4	M4
ENSG00000097046	CDC7	F2	ENSG00000096872	IFT74	S2	ENSG00000158008	EXTL1	U3	ENSG00000175906	ARL4D	M4
ENSG00000097096	SYDE2	F2	ENSG00000096968	JAK2	S2	ENSG00000158301	GPRASP2	U3	ENSG00000176046	NUPR1	M4
ENSG00000099284	MACROH2A2	F2	ENSG00000097033	SH3GLB1	S2	ENSG00000158555	GDPD5	U3	ENSG00000176058	TPRN	M4
ENSG00000099308	MAST3	F2	ENSG00000097046	CDC7	S2	ENSG00000158615	PPP1R15B	U3	ENSG00000176108	CHMP6	M4
ENSG00000099326	MZF1	F2	ENSG00000099139	PCSK5	S2	ENSG00000159128	IFNGR2	U3	ENSG00000176225	RTTN	M4
ENSG00000099331	MYO9B	F2	ENSG00000099203	TMED1	S2	ENSG00000159216	RUNX1	U3	ENSG00000176393	RNPEP	M4
ENSG00000099341	PSMD8	F2	ENSG00000099204	ABLIM1	S2	ENSG00000159231	CBR3	U3	ENSG00000176623	RMDN1	M4
ENSG00000099364	FBXL19	F2	ENSG00000099246	RAB18	S2	ENSG00000159256	MORC3	U3	ENSG00000176658	MYO1D	M4
ENSG00000099365	STX1B	F2	ENSG00000099250	NRP1	S2	ENSG00000159593	NAE1	U3	ENSG00000176783	RUFY1	M4
ENSG00000099385	BCL7C	F2	ENSG00000099308	MAST3	S2	ENSG00000159753	CARMIL2	U3	ENSG00000176890	TYMS	M4
ENSG00000099617	EFNA2	F2	ENSG00000099341	PSMD8	S2	ENSG00000160007	ARHGAP35	U3	ENSG00000177058	SLC38A9	M4
ENSG00000099622	CIRBP	F2	ENSG00000099365	STX1B	S2	ENSG00000160087	UBE2J2	U3	ENSG00000177105	RHOG	M4
ENSG00000099624	ATP5F1D	F2	ENSG00000099385	BCL7C	S2	ENSG00000160113	NR2F6	U3	ENSG00000177156	TALDO1	M4
ENSG00000099625	CBARP	F2	ENSG00000099622	CIRBP	S2	ENSG00000160145	KALRN	U3	ENSG00000177469	CAVIN1	M4
ENSG00000099783	HNRNPM	F2	ENSG00000099814	CEP170B	S2	ENSG00000160294	MCM3AP	U3	ENSG00000177733	HNRNPA0	M4
ENSG00000099785	MARCHF2	F2	ENSG00000099860	GADD45B	S2	ENSG00000160299	PCNT	U3	ENSG00000178425	NT5DC1	M4
ENSG00000099795	NDUFB7	F2	ENSG00000099864	PALM	S2	ENSG00000160310	PRMT2	U3	ENSG00000178927	CYBC1	M4
ENSG00000099797	TECR	F2	ENSG00000099904	ZDHHC8	S2	ENSG00000160392	C19orf47	U3	ENSG00000179104	TMTC2	M4
ENSG00000099800	TIMM13	F2	ENSG00000099910	KLHL22	S2	ENSG00000160563	MED27	U3	ENSG00000179178	TMEM125	M4
ENSG00000099810	MTAP	F2	ENSG00000099940	SNAP29	S2	ENSG00000160691	SHC1	U3	ENSG00000179295	PTPN11	M4
ENSG00000099814	CEP170B	F2	ENSG00000099942	CRKL	S2	ENSG00000160710	ADAR	U3	ENSG00000179388	EGR3	M4
ENSG00000099817	POLR2E	F2	ENSG00000099949	LZTR1	S2	ENSG00000161021	MAML1	U3	ENSG00000179403	VWA1	M4
ENSG00000099821	POLRMT	F2	ENSG00000099956	SMARCB1	S2	ENSG00000161091	MFSD12	U3	ENSG00000179526	SHARPIN	M4
ENSG00000099822	HCN2	F2	ENSG00000099957	P2RX6	S2	ENSG00000161202	DVL3	U3	ENSG00000179776	CDH5	M4
ENSG00000099840	IZUMO4	F2	ENSG00000099960	SLC7A4	S2	ENSG00000161243	FBXO27	U3	ENSG00000180354	MTURN	M4
ENSG00000099860	GADD45B	F2	ENSG00000099968	BCL2L13	S2	ENSG00000161328	LRRC56	U3	ENSG00000180423	HARBI1	M4
ENSG00000099875	MKNK2	F2	ENSG00000099995	SF3A1	S2	ENSG00000161544	CYGB	U3	ENSG00000180730	SHISA2	M4
ENSG00000099899	TRMT2A	F2	ENSG00000099998	GGT5	S2	ENSG00000161714	PLCD3	U3	ENSG00000180739	S1PR5	M4
ENSG00000099910	KLHL22	F2	ENSG00000100003	SEC14L2	S2	ENSG00000161960	EIF4A1	U3	ENSG00000180875	GREM2	M4
ENSG00000099937	SERPIND1	F2	ENSG00000100014	SPECC1L	S2	ENSG00000161970	RPL26	U3	ENSG00000180929	GPR62	M4
ENSG00000099940	SNAP29	F2	ENSG00000100027	YPEL1	S2	ENSG00000161996	WDR90	U3	ENSG00000181409	AATK	M4
ENSG00000099949	LZTR1	F2	ENSG00000100029	PES1	S2	ENSG00000161999	JMJD8	U3	ENSG00000181788	SIAH2	M4
ENSG00000099954	CECR2	F2	ENSG00000100030	MAPK1	S2	ENSG00000162073	PAQR4	U3	ENSG00000182173	TSEN54	M4
ENSG00000099956	SMARCB1	F2	ENSG00000100034	PPM1F	S2	ENSG00000162104	ADCY9	U3	ENSG00000182362	YBEY	M4
ENSG00000099960	SLC7A4	F2	ENSG00000100036	SLC35E4	S2	ENSG00000162129	CLPB	U3	ENSG00000182504	CEP97	M4
ENSG00000099995	SF3A1	F2	ENSG00000100055	CYTH4	S2	ENSG00000162390	ACOT11	U3	ENSG00000182993	C12orf60	M4
ENSG00000099999	RNF215	F2	ENSG00000100060	MFNG	S2	ENSG00000162413	KLHL21	U3	ENSG00000183077	AFMID	M4
ENSG00000100014	SPECC1L	F2	ENSG00000100077	GRK3	S2	ENSG00000162517	PEF1	U3	ENSG00000183111	ARHGEF37	M4
ENSG00000100023	PPIL2	F2	ENSG00000100095	SEZ6L	S2	ENSG00000162607	USP1	U3	ENSG00000183230	CTNNA3	M4
ENSG00000100028	SNRPD3	F2	ENSG00000100100	PIK3IP1	S2	ENSG00000162627	SNX7	U3	ENSG00000183283	DAZAP2	M4
ENSG00000100029	PES1	F2	ENSG00000100105	PATZ1	S2	ENSG00000162664	ZNF326	U3	ENSG00000183576	SETD3	M4
ENSG00000100036	SLC35E4	F2	ENSG00000100116	GCAT	S2	ENSG00000162736	NCSTN	U3	ENSG00000183597	TANGO2	M4
ENSG00000100055	CYTH4	F2	ENSG00000100129	EIF3L	S2	ENSG00000162910	MRPL55	U3	ENSG00000184005	ST6GALNAC3	M4
ENSG00000100056	ESS2	F2	ENSG00000100150	DEPDC5	S2	ENSG00000162924	REL	U3	ENSG00000184007	PTP4A2	M4
ENSG00000100060	MFNG	F2	ENSG00000100154	TTC28	S2	ENSG00000162976	SLC66A3	U3	ENSG00000184144	CNTN2	M4
ENSG00000100065	CARD10	F2	ENSG00000100167	SEPTIN3	S2	ENSG00000163002	NUP35	U3	ENSG00000184164	CRELD2	M4
ENSG00000100077	GRK3	F2	ENSG00000100196	KDELR3	S2	ENSG00000163029	SMC6	U3	ENSG00000184209	SNRNP35	M4
ENSG00000100083	GGA1	F2	ENSG00000100201	DDX17	S2	ENSG00000163281	GNPDA2	U3	ENSG00000184857	TMEM186	M4
ENSG00000100092	SH3BP1	F2	ENSG00000100206	DMC1	S2	ENSG00000163463	KRTCAP2	U3	ENSG00000184967	NOC4L	M4
ENSG00000100095	SEZ6L	F2	ENSG00000100209	HSCB	S2	ENSG00000163512	AZI2	U3	ENSG00000185418	TARS3	M4
ENSG00000100097	LGALS1	F2	ENSG00000100216	TOMM22	S2	ENSG00000163655	GMPS	U3	ENSG00000185634	SHC4	M4
ENSG00000100099	HPS4	F2	ENSG00000100220	RTCB	S2	ENSG00000163681	SLMAP	U3	ENSG00000185697	MYBL1	M4
ENSG00000100100	PIK3IP1	F2	ENSG00000100225	FBXO7	S2	ENSG00000163714	U2SURP	U3	ENSG00000185917	SETD4	M4
ENSG00000100104	SRRD	F2	ENSG00000100227	POLDIP3	S2	ENSG00000163743	RCHY1	U3	ENSG00000186088	GSAP	M4
ENSG00000100106	TRIOBP	F2	ENSG00000100234	TIMP3	S2	ENSG00000163781	TOPBP1	U3	ENSG00000186340	THBS2	M4
ENSG00000100109	TFIP11	F2	ENSG00000100239	PPP6R2	S2	ENSG00000163807	KIAA1143	U3	ENSG00000186417	GLDN	M4
ENSG00000100116	GCAT	F2	ENSG00000100266	PACSIN2	S2	ENSG00000163827	LRRC2	U3	ENSG00000186666	BCDIN3D	M4
ENSG00000100138	SNU13	F2	ENSG00000100276	RASL10A	S2	ENSG00000163875	MEAF6	U3	ENSG00000186812	ZNF397	M4
ENSG00000100142	POLR2F	F2	ENSG00000100280	AP1B1	S2	ENSG00000164008	C1orf50	U3	ENSG00000187098	MITF	M4
ENSG00000100150	DEPDC5	F2	ENSG00000100284	TOM1	S2	ENSG00000164031	DNAJB14	U3	ENSG00000187147	RNF220	M4
ENSG00000100151	PICK1	F2	ENSG00000100285	NEFH	S2	ENSG00000164032	H2AZ1	U3	ENSG00000187164	SHTN1	M4
ENSG00000100167	SEPTIN3	F2	ENSG00000100297	MCM5	S2	ENSG00000164068	RNF123	U3	ENSG00000187608	ISG15	M4
ENSG00000100196	KDELR3	F2	ENSG00000100304	TTLL12	S2	ENSG00000164070	HSPA4L	U3	ENSG00000187775	DNAH17	M4
ENSG00000100201	DDX17	F2	ENSG00000100316	RPL3	S2	ENSG00000164077	MON1A	U3	ENSG00000188153	COL4A5	M4
ENSG00000100206	DMC1	F2	ENSG00000100320	RBFOX2	S2	ENSG00000164209	SLC25A46	U3	ENSG00000188243	COMMD6	M4
ENSG00000100211	CBY1	F2	ENSG00000100321	SYNGR1	S2	ENSG00000164220	F2RL2	U3	ENSG00000188643	S100A16	M4
ENSG00000100219	XBP1	F2	ENSG00000100330	MTMR3	S2	ENSG00000164323	CFAP97	U3	ENSG00000188706	ZDHHC9	M4
ENSG00000100220	RTCB	F2	ENSG00000100346	CACNA1I	S2	ENSG00000164326	CARTPT	U3	ENSG00000188859	FAM78B	M4
ENSG00000100226	GTPBP1	F2	ENSG00000100347	SAMM50	S2	ENSG00000164332	UBLCP1	U3	ENSG00000189058	APOD	M4
ENSG00000100234	TIMP3	F2	ENSG00000100350	FOXRED2	S2	ENSG00000164414	SLC35A1	U3	ENSG00000189067	LITAF	M4
ENSG00000100239	PPP6R2	F2	ENSG00000100354	TNRC6B	S2	ENSG00000164483	SAMD3	U3	ENSG00000189077	TMEM120A	M4
ENSG00000100242	SUN2	F2	ENSG00000100360	IFT27	S2	ENSG00000164736	SOX17	U3	ENSG00000196118	CFAP119	M4
ENSG00000100243	CYB5R3	F2	ENSG00000100362	PVALB	S2	ENSG00000164751	PEX2	U3	ENSG00000196151	WDSUB1	M4
ENSG00000100258	LMF2	F2	ENSG00000100372	SLC25A17	S2	ENSG00000164932	CTHRC1	U3	ENSG00000196187	TMEM63A	M4
ENSG00000100263	RHBDD3	F2	ENSG00000100376	FAM118A	S2	ENSG00000165006	UBAP1	U3	ENSG00000196914	ARHGEF12	M4
ENSG00000100266	PACSIN2	F2	ENSG00000100379	KCTD17	S2	ENSG00000165102	HGSNAT	U3	ENSG00000196981	WDR5B	M4
ENSG00000100271	TTLL1	F2	ENSG00000100380	ST13	S2	ENSG00000165209	STRBP	U3	ENSG00000197024	ZNF398	M4
ENSG00000100276	RASL10A	F2	ENSG00000100393	EP300	S2	ENSG00000165280	VCP	U3	ENSG00000197063	MAFG	M4
ENSG00000100280	AP1B1	F2	ENSG00000100395	L3MBTL2	S2	ENSG00000165355	FBXO33	U3	ENSG00000197381	ADARB1	M4
ENSG00000100281	HMGXB4	F2	ENSG00000100399	CHADL	S2	ENSG00000165525	NEMF	U3	ENSG00000197430	OPALIN	M4
ENSG00000100285	NEFH	F2	ENSG00000100401	RANGAP1	S2	ENSG00000165637	VDAC2	U3	ENSG00000197448	GSTK1	M4
ENSG00000100294	MCAT	F2	ENSG00000100426	ZBED4	S2	ENSG00000165650	PDZD8	U3	ENSG00000197461	PDGFA	M4
ENSG00000100297	MCM5	F2	ENSG00000100433	KCNK10	S2	ENSG00000165661	QSOX2	U3	ENSG00000197822	OCLN	M4
ENSG00000100299	ARSA	F2	ENSG00000100441	KHNYN	S2	ENSG00000165724	ZMYND19	U3	ENSG00000197892	KIF13B	M4
ENSG00000100302	RASD2	F2	ENSG00000100442	FKBP3	S2	ENSG00000165733	BMS1	U3	ENSG00000197971	MBP	M4
ENSG00000100304	TTLL12	F2	ENSG00000100445	SDR39U1	S2	ENSG00000165802	NSMF	U3	ENSG00000198001	IRAK4	M4
ENSG00000100307	CBX7	F2	ENSG00000100462	PRMT5	S2	ENSG00000165804	ZNF219	U3	ENSG00000198034	RPS4X	M4
ENSG00000100311	PDGFB	F2	ENSG00000100478	AP4S1	S2	ENSG00000165886	UBTD1	U3	ENSG00000198121	LPAR1	M4
ENSG00000100319	ZMAT5	F2	ENSG00000100485	SOS2	S2	ENSG00000166068	SPRED1	U3	ENSG00000198369	SPRED2	M4
ENSG00000100321	SYNGR1	F2	ENSG00000100490	CDKL1	S2	ENSG00000166073	GPR176	U3	ENSG00000198467	TPM2	M4
ENSG00000100324	TAB1	F2	ENSG00000100503	NIN	S2	ENSG00000166133	RPUSD2	U3	ENSG00000198597	ZNF536	M4
ENSG00000100325	ASCC2	F2	ENSG00000100504	PYGL	S2	ENSG00000166272	WBP1L	U3	ENSG00000198771	RCSD1	M4
ENSG00000100344	PNPLA3	F2	ENSG00000100505	TRIM9	S2	ENSG00000166311	SMPD1	U3	ENSG00000198835	GJC2	M4
ENSG00000100345	MYH9	F2	ENSG00000100519	PSMC6	S2	ENSG00000166321	NUDT13	U3	ENSG00000198839	ZNF277	M4
ENSG00000100346	CACNA1I	F2	ENSG00000100523	DDHD1	S2	ENSG00000166407	LMO1	U3	ENSG00000198964	SGMS1	M4
ENSG00000100347	SAMM50	F2	ENSG00000100526	CDKN3	S2	ENSG00000166441	RPL27A	U3	ENSG00000203485	INF2	M4
ENSG00000100348	TXN2	F2	ENSG00000100528	CNIH1	S2	ENSG00000166450	PRTG	U3	ENSG00000203877	RIPPLY2	M4
ENSG00000100350	FOXRED2	F2	ENSG00000100532	CGRRF1	S2	ENSG00000166471	TMEM41B	U3	ENSG00000204084	INPP5B	M4
ENSG00000100353	EIF3D	F2	ENSG00000100554	ATP6V1D	S2	ENSG00000166685	COG1	U3	ENSG00000204257	HLA-DMA	M4
ENSG00000100354	TNRC6B	F2	ENSG00000100564	PIGH	S2	ENSG00000166747	AP1G1	U3	ENSG00000204392	LSM2	M4
ENSG00000100359	SGSM3	F2	ENSG00000100567	PSMA3	S2	ENSG00000166851	PLK1	U3	ENSG00000204482	LST1	M4
ENSG00000100360	IFT27	F2	ENSG00000100575	TIMM9	S2	ENSG00000166924	NYAP1	U3	ENSG00000204655	MOG	M4
ENSG00000100362	PVALB	F2	ENSG00000100578	KIAA0586	S2	ENSG00000167106	FAM102A	U3	ENSG00000204859	ZBTB48	M4
ENSG00000100376	FAM118A	F2	ENSG00000100580	TMED8	S2	ENSG00000167526	RPL13	U3	ENSG00000205116	TMEM88B	M4
ENSG00000100379	KCTD17	F2	ENSG00000100592	DAAM1	S2	ENSG00000167552	TUBA1A	U3	ENSG00000205220	PSMB10	M4
ENSG00000100393	EP300	F2	ENSG00000100596	SPTLC2	S2	ENSG00000167716	WDR81	U3	ENSG00000205250	E2F4	M4
ENSG00000100395	L3MBTL2	F2	ENSG00000100601	ALKBH1	S2	ENSG00000167771	RCOR2	U3	ENSG00000205744	DENND1C	M4
ENSG00000100399	CHADL	F2	ENSG00000100603	SNW1	S2	ENSG00000167971	CASKIN1	U3	ENSG00000205758	CRYZL1	M4
ENSG00000100401	RANGAP1	F2	ENSG00000100604	CHGA	S2	ENSG00000168067	MAP4K2	U3	ENSG00000206053	JPT2	M4
ENSG00000100410	PHF5A	F2	ENSG00000100605	ITPK1	S2	ENSG00000168101	NUDT16L1	U3	ENSG00000206562	METTL6	M4
ENSG00000100412	ACO2	F2	ENSG00000100614	PPM1A	S2	ENSG00000168243	GNG4	U3	ENSG00000213186	TRIM59	M4
ENSG00000100413	POLR3H	F2	ENSG00000100625	SIX4	S2	ENSG00000168283	BMI1	U3	ENSG00000213853	EMP2	M4
ENSG00000100417	PMM1	F2	ENSG00000100626	GALNT16	S2	ENSG00000168288	MMADHC	U3	ENSG00000214194	SMIM30	M4
ENSG00000100422	CERK	F2	ENSG00000100629	CEP128	S2	ENSG00000168438	CDC40	U3	ENSG00000215193	PEX26	M4
ENSG00000100425	BRD1	F2	ENSG00000100644	HIF1A	S2	ENSG00000168496	FEN1	U3	ENSG00000217128	FNIP1	M4
ENSG00000100426	ZBED4	F2	ENSG00000100647	SUSD6	S2	ENSG00000168517	HEXIM2	U3	ENSG00000221866	PLXNA4	M4
ENSG00000100433	KCNK10	F2	ENSG00000100664	EIF5	S2	ENSG00000168653	NDUFS5	U3	ENSG00000221988	PPT2	M4
ENSG00000100439	ABHD4	F2	ENSG00000100678	SLC8A3	S2	ENSG00000168872	DDX19A	U3	ENSG00000223501	VPS52	M4
ENSG00000100441	KHNYN	F2	ENSG00000100697	DICER1	S2	ENSG00000168883	USP39	U3	ENSG00000225921	NOL7	M4
ENSG00000100442	FKBP3	F2	ENSG00000100711	ZFYVE21	S2	ENSG00000168890	TMEM150A	U3	ENSG00000237441	RGL2	M4
ENSG00000100445	SDR39U1	F2	ENSG00000100714	MTHFD1	S2	ENSG00000168936	TMEM129	U3	ENSG00000239264	TXNDC5	M4
ENSG00000100462	PRMT5	F2	ENSG00000100722	ZC3H14	S2	ENSG00000168958	MFF	U3	ENSG00000244274	DBNDD2	M4
ENSG00000100473	COCH	F2	ENSG00000100726	TELO2	S2	ENSG00000169019	COMMD8	U3	ENSG00000250317	SMIM20	M4
ENSG00000100478	AP4S1	F2	ENSG00000100731	PCNX1	S2	ENSG00000169062	UPF3A	U3	ENSG00000250722	SELENOP	M4
ENSG00000100483	VCPKMT	F2	ENSG00000100744	GSKIP	S2	ENSG00000169139	UBE2V2	U3	ENSG00000255561	FDXACB1	M4
ENSG00000100485	SOS2	F2	ENSG00000100749	VRK1	S2	ENSG00000169221	TBC1D10B	U3	ENSG00000265107	GJA5	M4
ENSG00000100490	CDKL1	F2	ENSG00000100784	RPS6KA5	S2	ENSG00000169439	SDC2	U3	ENSG00000266524	GDF10	M4
ENSG00000100503	NIN	F2	ENSG00000100796	PPP4R3A	S2	ENSG00000169446	MMGT1	U3	ENSG00000276023	DUSP14	M4
ENSG00000100504	PYGL	F2	ENSG00000100811	YY1	S2	ENSG00000169554	ZEB2	U3	ENSG00000276644	DACH1	M4
ENSG00000100523	DDHD1	F2	ENSG00000100815	TRIP11	S2	ENSG00000169727	GPS1	U3	ENSG00000003989	SLC7A2	M5
ENSG00000100532	CGRRF1	F2	ENSG00000100823	APEX1	S2	ENSG00000169740	ZNF32	U3	ENSG00000004961	HCCS	M5
ENSG00000100554	ATP6V1D	F2	ENSG00000100852	ARHGAP5	S2	ENSG00000169758	TMEM266	U3	ENSG00000004975	DVL2	M5
ENSG00000100564	PIGH	F2	ENSG00000100884	CPNE6	S2	ENSG00000169762	TAPT1	U3	ENSG00000005194	CIAPIN1	M5
ENSG00000100567	PSMA3	F2	ENSG00000100890	PRORP	S2	ENSG00000169813	HNRNPF	U3	ENSG00000005249	PRKAR2B	M5
ENSG00000100568	VTI1B	F2	ENSG00000100902	PSMA6	S2	ENSG00000169926	KLF13	U3	ENSG00000005486	RHBDD2	M5
ENSG00000100577	GSTZ1	F2	ENSG00000100916	BRMS1L	S2	ENSG00000169967	MAP3K2	U3	ENSG00000006025	OSBPL7	M5
ENSG00000100578	KIAA0586	F2	ENSG00000100926	TM9SF1	S2	ENSG00000170088	TMEM192	U3	ENSG00000006625	GGCT	M5
ENSG00000100591	AHSA1	F2	ENSG00000100934	SEC23A	S2	ENSG00000170144	HNRNPA3	U3	ENSG00000006715	VPS41	M5
ENSG00000100592	DAAM1	F2	ENSG00000100941	PNN	S2	ENSG00000170293	CMTM8	U3	ENSG00000006740	ARHGAP44	M5
ENSG00000100600	LGMN	F2	ENSG00000100979	PLTP	S2	ENSG00000170310	STX8	U3	ENSG00000007168	PAFAH1B1	M5
ENSG00000100601	ALKBH1	F2	ENSG00000100991	TRPC4AP	S2	ENSG00000170315	UBB	U3	ENSG00000007372	PAX6	M5
ENSG00000100604	CHGA	F2	ENSG00000100994	PYGB	S2	ENSG00000170370	EMX2	U3	ENSG00000007384	RHBDF1	M5
ENSG00000100626	GALNT16	F2	ENSG00000100997	ABHD12	S2	ENSG00000170381	SEMA3E	U3	ENSG00000007866	TEAD3	M5
ENSG00000100629	CEP128	F2	ENSG00000101003	GINS1	S2	ENSG00000170382	LRRN2	U3	ENSG00000008277	ADAM22	M5
ENSG00000100644	HIF1A	F2	ENSG00000101019	UQCC1	S2	ENSG00000170385	SLC30A1	U3	ENSG00000008283	CYB561	M5
ENSG00000100647	SUSD6	F2	ENSG00000101052	IFT52	S2	ENSG00000170855	TRIAP1	U3	ENSG00000009335	UBE3C	M5
ENSG00000100650	SRSF5	F2	ENSG00000101079	NDRG3	S2	ENSG00000171109	MFN1	U3	ENSG00000009830	POMT2	M5
ENSG00000100664	EIF5	F2	ENSG00000101084	RAB5IF	S2	ENSG00000171135	JAGN1	U3	ENSG00000010017	RANBP9	M5
ENSG00000100678	SLC8A3	F2	ENSG00000101096	NFATC2	S2	ENSG00000171169	NAIF1	U3	ENSG00000011007	ELOA	M5
ENSG00000100697	DICER1	F2	ENSG00000101098	RIMS4	S2	ENSG00000171262	FAM98B	U3	ENSG00000011304	PTBP1	M5
ENSG00000100711	ZFYVE21	F2	ENSG00000101109	STK4	S2	ENSG00000171365	CLCN5	U3	ENSG00000011485	PPP5C	M5
ENSG00000100714	MTHFD1	F2	ENSG00000101132	PFDN4	S2	ENSG00000171453	POLR1C	U3	ENSG00000015285	WAS	M5
ENSG00000100726	TELO2	F2	ENSG00000101144	BMP7	S2	ENSG00000171497	PPID	U3	ENSG00000015676	NUDCD3	M5
ENSG00000100744	GSKIP	F2	ENSG00000101146	RAE1	S2	ENSG00000171532	NEUROD2	U3	ENSG00000018236	CNTN1	M5
ENSG00000100749	VRK1	F2	ENSG00000101150	TPD52L2	S2	ENSG00000171608	PIK3CD	U3	ENSG00000021645	NRXN3	M5
ENSG00000100764	PSMC1	F2	ENSG00000101152	DNAJC5	S2	ENSG00000171863	RPS7	U3	ENSG00000023445	BIRC3	M5
ENSG00000100767	PAPLN	F2	ENSG00000101161	PRPF6	S2	ENSG00000171914	TLN2	U3	ENSG00000024422	EHD2	M5
ENSG00000100784	RPS6KA5	F2	ENSG00000101166	PRELID3B	S2	ENSG00000172020	GAP43	U3	ENSG00000025800	KPNA6	M5
ENSG00000100796	PPP4R3A	F2	ENSG00000101180	HRH3	S2	ENSG00000172159	FRMD3	U3	ENSG00000026025	VIM	M5
ENSG00000100802	C14orf93	F2	ENSG00000101188	NTSR1	S2	ENSG00000172172	MRPL13	U3	ENSG00000028839	TBPL1	M5
ENSG00000100804	PSMB5	F2	ENSG00000101191	DIDO1	S2	ENSG00000172339	ALG14	U3	ENSG00000029534	ANK1	M5
ENSG00000100811	YY1	F2	ENSG00000101193	GID8	S2	ENSG00000172466	ZNF24	U3	ENSG00000033627	ATP6V0A1	M5
ENSG00000100813	ACIN1	F2	ENSG00000101199	ARFGAP1	S2	ENSG00000172757	CFL1	U3	ENSG00000033800	PIAS1	M5
ENSG00000100815	TRIP11	F2	ENSG00000101204	CHRNA4	S2	ENSG00000172890	NADSYN1	U3	ENSG00000034053	APBA2	M5
ENSG00000100823	APEX1	F2	ENSG00000101224	CDC25B	S2	ENSG00000172977	KAT5	U3	ENSG00000040341	STAU2	M5
ENSG00000100836	PABPN1	F2	ENSG00000101230	ISM1	S2	ENSG00000172985	SH3RF3	U3	ENSG00000040731	CDH10	M5
ENSG00000100852	ARHGAP5	F2	ENSG00000101236	RNF24	S2	ENSG00000173085	COQ2	U3	ENSG00000041353	RAB27B	M5
ENSG00000100865	CINP	F2	ENSG00000101247	NDUFAF5	S2	ENSG00000173113	TRMT112	U3	ENSG00000041988	THAP3	M5
ENSG00000100888	CHD8	F2	ENSG00000101276	SLC52A3	S2	ENSG00000173114	LRRN3	U3	ENSG00000042286	AIFM2	M5
ENSG00000100889	PCK2	F2	ENSG00000101290	CDS2	S2	ENSG00000173141	MRPL57	U3	ENSG00000044459	CNTLN	M5
ENSG00000100902	PSMA6	F2	ENSG00000101292	PROKR2	S2	ENSG00000173163	COMMD1	U3	ENSG00000047597	XK	M5
ENSG00000100906	NFKBIA	F2	ENSG00000101294	HM13	S2	ENSG00000173227	SYT12	U3	ENSG00000048342	CC2D2A	M5
ENSG00000100908	EMC9	F2	ENSG00000101298	SNPH	S2	ENSG00000173320	STOX2	U3	ENSG00000048707	VPS13D	M5
ENSG00000100926	TM9SF1	F2	ENSG00000101310	SEC23B	S2	ENSG00000173418	NAA20	U3	ENSG00000050748	MAPK9	M5
ENSG00000100941	PNN	F2	ENSG00000101327	PDYN	S2	ENSG00000173611	SCAI	U3	ENSG00000054118	THRAP3	M5
ENSG00000100949	RABGGTA	F2	ENSG00000101333	PLCB4	S2	ENSG00000173838	MARCHF10	U3	ENSG00000057663	ATG5	M5
ENSG00000100968	NFATC4	F2	ENSG00000101336	HCK	S2	ENSG00000173898	SPTBN2	U3	ENSG00000059588	TARBP1	M5
ENSG00000100982	PCIF1	F2	ENSG00000101337	TM9SF4	S2	ENSG00000173915	ATP5MK	U3	ENSG00000061918	GUCY1B1	M5
ENSG00000100983	GSS	F2	ENSG00000101343	CRNKL1	S2	ENSG00000173992	CCS	U3	ENSG00000062282	DGAT2	M5
ENSG00000100991	TRPC4AP	F2	ENSG00000101346	POFUT1	S2	ENSG00000174132	FAM174A	U3	ENSG00000064932	SBNO2	M5
ENSG00000100997	ABHD12	F2	ENSG00000101349	PAK5	S2	ENSG00000174137	FAM53A	U3	ENSG00000065243	PKN2	M5
ENSG00000101004	NINL	F2	ENSG00000101350	KIF3B	S2	ENSG00000174173	TRMT10C	U3	ENSG00000065457	ADAT1	M5
ENSG00000101019	UQCC1	F2	ENSG00000101361	NOP56	S2	ENSG00000174227	PIGG	U3	ENSG00000065526	SPEN	M5
ENSG00000101079	NDRG3	F2	ENSG00000101363	MANBAL	S2	ENSG00000174231	PRPF8	U3	ENSG00000065559	MAP2K4	M5
ENSG00000101084	RAB5IF	F2	ENSG00000101365	IDH3B	S2	ENSG00000174574	AKIRIN1	U3	ENSG00000066379	POLR1H	M5
ENSG00000101096	NFATC2	F2	ENSG00000101367	MAPRE1	S2	ENSG00000174695	TMEM167A	U3	ENSG00000067715	SYT1	M5
ENSG00000101098	RIMS4	F2	ENSG00000101391	CDK5RAP1	S2	ENSG00000174738	NR1D2	U3	ENSG00000069869	NEDD4	M5
ENSG00000101132	PFDN4	F2	ENSG00000101407	TTI1	S2	ENSG00000174748	RPL15	U3	ENSG00000070087	PFN2	M5
ENSG00000101134	DOK5	F2	ENSG00000101412	E2F1	S2	ENSG00000174871	CNIH2	U3	ENSG00000070366	SMG6	M5
ENSG00000101138	CSTF1	F2	ENSG00000101413	RPRD1B	S2	ENSG00000174891	RSRC1	U3	ENSG00000070423	RNF126	M5
ENSG00000101144	BMP7	F2	ENSG00000101417	PXMP4	S2	ENSG00000174903	RAB1B	U3	ENSG00000070610	GBA2	M5
ENSG00000101158	NELFCD	F2	ENSG00000101421	CHMP4B	S2	ENSG00000174939	ASPHD1	U3	ENSG00000070718	AP3M2	M5
ENSG00000101160	CTSZ	F2	ENSG00000101438	SLC32A1	S2	ENSG00000174953	DHX36	U3	ENSG00000072736	NFATC3	M5
ENSG00000101161	PRPF6	F2	ENSG00000101474	APMAP	S2	ENSG00000175354	PTPN2	U3	ENSG00000072778	ACADVL	M5
ENSG00000101166	PRELID3B	F2	ENSG00000101489	CELF4	S2	ENSG00000175782	SLC35E3	U3	ENSG00000072832	CRMP1	M5
ENSG00000101180	HRH3	F2	ENSG00000101493	ZNF516	S2	ENSG00000175792	RUVBL1	U3	ENSG00000072840	EVC	M5
ENSG00000101182	PSMA7	F2	ENSG00000101544	ADNP2	S2	ENSG00000175984	DENND2C	U3	ENSG00000073050	XRCC1	M5
ENSG00000101191	DIDO1	F2	ENSG00000101557	USP14	S2	ENSG00000176014	TUBB6	U3	ENSG00000073536	NLE1	M5
ENSG00000101193	GID8	F2	ENSG00000101558	VAPA	S2	ENSG00000176208	ATAD5	U3	ENSG00000073578	SDHA	M5
ENSG00000101198	NKAIN4	F2	ENSG00000101577	LPIN2	S2	ENSG00000176261	ZBTB8OS	U3	ENSG00000074356	NCBP3	M5
ENSG00000101199	ARFGAP1	F2	ENSG00000101596	SMCHD1	S2	ENSG00000176273	SLC35G1	U3	ENSG00000075035	WSCD2	M5
ENSG00000101210	EEF1A2	F2	ENSG00000101605	MYOM1	S2	ENSG00000176532	PRR15	U3	ENSG00000075568	TMEM131	M5
ENSG00000101216	GMEB2	F2	ENSG00000101624	CEP76	S2	ENSG00000176853	FAM91A1	U3	ENSG00000075884	ARHGAP15	M5
ENSG00000101220	C20orf27	F2	ENSG00000101639	CEP192	S2	ENSG00000176907	TCIM	U3	ENSG00000075945	KIFAP3	M5
ENSG00000101222	SPEF1	F2	ENSG00000101654	RNMT	S2	ENSG00000176956	LY6H	U3	ENSG00000077080	ACTL6B	M5
ENSG00000101224	CDC25B	F2	ENSG00000101680	LAMA1	S2	ENSG00000176994	SMCR8	U3	ENSG00000078114	NEBL	M5
ENSG00000101236	RNF24	F2	ENSG00000101745	ANKRD12	S2	ENSG00000177042	TMEM80	U3	ENSG00000078304	PPP2R5C	M5
ENSG00000101247	NDUFAF5	F2	ENSG00000101746	NOL4	S2	ENSG00000177082	WDR73	U3	ENSG00000078403	MLLT10	M5
ENSG00000101265	RASSF2	F2	ENSG00000101751	POLI	S2	ENSG00000177542	SLC25A22	U3	ENSG00000078725	BRINP1	M5
ENSG00000101276	SLC52A3	F2	ENSG00000101752	MIB1	S2	ENSG00000177565	TBL1XR1	U3	ENSG00000079335	CDC14A	M5
ENSG00000101290	CDS2	F2	ENSG00000101773	RBBP8	S2	ENSG00000177868	SVBP	U3	ENSG00000079785	DDX1	M5
ENSG00000101292	PROKR2	F2	ENSG00000101782	RIOK3	S2	ENSG00000177879	AP3S1	U3	ENSG00000081138	CDH7	M5
ENSG00000101294	HM13	F2	ENSG00000101856	PGRMC1	S2	ENSG00000177889	UBE2N	U3	ENSG00000081791	DELE1	M5
ENSG00000101327	PDYN	F2	ENSG00000101868	POLA1	S2	ENSG00000178074	C2orf69	U3	ENSG00000082293	COL19A1	M5
ENSG00000101333	PLCB4	F2	ENSG00000101882	NKAP	S2	ENSG00000178078	STAP2	U3	ENSG00000082397	EPB41L3	M5
ENSG00000101335	MYL9	F2	ENSG00000101888	NXT2	S2	ENSG00000178403	NEUROG2	U3	ENSG00000083168	KAT6A	M5
ENSG00000101336	HCK	F2	ENSG00000101901	ALG13	S2	ENSG00000178878	APOLD1	U3	ENSG00000083535	PIBF1	M5
ENSG00000101343	CRNKL1	F2	ENSG00000101911	PRPS2	S2	ENSG00000178952	TUFM	U3	ENSG00000083720	OXCT1	M5
ENSG00000101346	POFUT1	F2	ENSG00000101928	MOSPD1	S2	ENSG00000179071	CCDC89	U3	ENSG00000084444	FAM234B	M5
ENSG00000101347	SAMHD1	F2	ENSG00000101935	AMMECR1	S2	ENSG00000179104	TMTC2	U3	ENSG00000084652	TXLNA	M5
ENSG00000101350	KIF3B	F2	ENSG00000101938	CHRDL1	S2	ENSG00000179151	EDC3	U3	ENSG00000085433	WDR47	M5
ENSG00000101353	MROH8	F2	ENSG00000101940	WDR13	S2	ENSG00000179403	VWA1	U3	ENSG00000085465	OVGP1	M5
ENSG00000101361	NOP56	F2	ENSG00000101945	SUV39H1	S2	ENSG00000179455	MKRN3	U3	ENSG00000086300	SNX10	M5
ENSG00000101363	MANBAL	F2	ENSG00000101958	GLRA2	S2	ENSG00000179583	CIITA	U3	ENSG00000087191	PSMC5	M5
ENSG00000101365	IDH3B	F2	ENSG00000101966	XIAP	S2	ENSG00000179598	PLD6	U3	ENSG00000087269	NOP14	M5
ENSG00000101367	MAPRE1	F2	ENSG00000101972	STAG2	S2	ENSG00000179796	LRRC3B	U3	ENSG00000087448	KLHL42	M5
ENSG00000101407	TTI1	F2	ENSG00000101974	ATP11C	S2	ENSG00000179981	TSHZ1	U3	ENSG00000088038	CNOT3	M5
ENSG00000101412	E2F1	F2	ENSG00000102001	CACNA1F	S2	ENSG00000180228	PRKRA	U3	ENSG00000088280	ASAP3	M5
ENSG00000101417	PXMP4	F2	ENSG00000102024	PLS3	S2	ENSG00000180304	OAZ2	U3	ENSG00000088682	COQ9	M5
ENSG00000101421	CHMP4B	F2	ENSG00000102032	RENBP	S2	ENSG00000180329	CCDC43	U3	ENSG00000088812	ATRN	M5
ENSG00000101438	SLC32A1	F2	ENSG00000102038	SMARCA1	S2	ENSG00000180425	C11orf71	U3	ENSG00000089159	PXN	M5
ENSG00000101442	ACTR5	F2	ENSG00000102053	ZC3H12B	S2	ENSG00000180448	ARHGAP45	U3	ENSG00000089820	ARHGAP4	M5
ENSG00000101452	DHX35	F2	ENSG00000102054	RBBP7	S2	ENSG00000180616	SSTR2	U3	ENSG00000090857	PDPR	M5
ENSG00000101460	MAP1LC3A	F2	ENSG00000102057	KCND1	S2	ENSG00000180758	GPR157	U3	ENSG00000091129	NRCAM	M5
ENSG00000101473	ACOT8	F2	ENSG00000102078	SLC25A14	S2	ENSG00000180817	PPA1	U3	ENSG00000091157	WDR7	M5
ENSG00000101474	APMAP	F2	ENSG00000102081	FMR1	S2	ENSG00000180822	PSMG4	U3	ENSG00000091262	ABCC6	M5
ENSG00000101542	CDH20	F2	ENSG00000102100	SLC35A2	S2	ENSG00000180914	OXTR	U3	ENSG00000091972	CD200	M5
ENSG00000101546	RBFA	F2	ENSG00000102109	PCSK1N	S2	ENSG00000180998	GPR137C	U3	ENSG00000092096	SLC22A17	M5
ENSG00000101577	LPIN2	F2	ENSG00000102144	PGK1	S2	ENSG00000181072	CHRM2	U3	ENSG00000092820	EZR	M5
ENSG00000101596	SMCHD1	F2	ENSG00000102172	SMS	S2	ENSG00000181315	ZNF322	U3	ENSG00000095059	DHPS	M5
ENSG00000101624	CEP76	F2	ENSG00000102181	CD99L2	S2	ENSG00000181467	RAP2B	U3	ENSG00000096746	HNRNPH3	M5
ENSG00000101638	ST8SIA5	F2	ENSG00000102189	EEA1	S2	ENSG00000181704	YIPF6	U3	ENSG00000096872	IFT74	M5
ENSG00000101639	CEP192	F2	ENSG00000102218	RP2	S2	ENSG00000182359	KBTBD3	U3	ENSG00000099203	TMED1	M5
ENSG00000101680	LAMA1	F2	ENSG00000102221	JADE3	S2	ENSG00000182552	RWDD4	U3	ENSG00000099840	IZUMO4	M5
ENSG00000101695	RNF125	F2	ENSG00000102225	CDK16	S2	ENSG00000182768	NGRN	U3	ENSG00000099875	MKNK2	M5
ENSG00000101745	ANKRD12	F2	ENSG00000102226	USP11	S2	ENSG00000182774	RPS17	U3	ENSG00000100325	ASCC2	M5
ENSG00000101752	MIB1	F2	ENSG00000102230	PCYT1B	S2	ENSG00000182831	HAPSTR1	U3	ENSG00000100348	TXN2	M5
ENSG00000101773	RBBP8	F2	ENSG00000102241	HTATSF1	S2	ENSG00000182872	RBM10	U3	ENSG00000100401	RANGAP1	M5
ENSG00000101811	CSTF2	F2	ENSG00000102265	TIMP1	S2	ENSG00000183208	GDPGP1	U3	ENSG00000100523	DDHD1	M5
ENSG00000101843	PSMD10	F2	ENSG00000102302	FGD1	S2	ENSG00000183337	BCOR	U3	ENSG00000100600	LGMN	M5
ENSG00000101868	POLA1	F2	ENSG00000102316	MAGED2	S2	ENSG00000183570	PCBP3	U3	ENSG00000100604	CHGA	M5
ENSG00000101871	MID1	F2	ENSG00000102349	KLF8	S2	ENSG00000183654	MARCHF11	U3	ENSG00000100614	PPM1A	M5
ENSG00000101882	NKAP	F2	ENSG00000102359	SRPX2	S2	ENSG00000183853	KIRREL1	U3	ENSG00000100744	GSKIP	M5
ENSG00000101888	NXT2	F2	ENSG00000102383	ZDHHC15	S2	ENSG00000183943	PRKX	U3	ENSG00000100767	PAPLN	M5
ENSG00000101901	ALG13	F2	ENSG00000102390	PBDC1	S2	ENSG00000184007	PTP4A2	U3	ENSG00000100813	ACIN1	M5
ENSG00000101911	PRPS2	F2	ENSG00000102393	GLA	S2	ENSG00000184497	TMEM255B	U3	ENSG00000101040	ZMYND8	M5
ENSG00000101935	AMMECR1	F2	ENSG00000102401	ARMCX3	S2	ENSG00000184545	DUSP8	U3	ENSG00000101126	ADNP	M5
ENSG00000101938	CHRDL1	F2	ENSG00000102452	NALCN	S2	ENSG00000184831	APOO	U3	ENSG00000101144	BMP7	M5
ENSG00000101966	XIAP	F2	ENSG00000102466	FGF14	S2	ENSG00000184924	PTRHD1	U3	ENSG00000101152	DNAJC5	M5
ENSG00000101972	STAG2	F2	ENSG00000102468	HTR2A	S2	ENSG00000185046	ANKS1B	U3	ENSG00000101224	CDC25B	M5
ENSG00000101974	ATP11C	F2	ENSG00000102471	NDFIP2	S2	ENSG00000185053	SGCZ	U3	ENSG00000101654	RNMT	M5
ENSG00000101986	ABCD1	F2	ENSG00000102524	TNFSF13B	S2	ENSG00000185187	SIGIRR	U3	ENSG00000102003	SYP	M5
ENSG00000102001	CACNA1F	F2	ENSG00000102531	FNDC3A	S2	ENSG00000185250	PPIL6	U3	ENSG00000102181	CD99L2	M5
ENSG00000102003	SYP	F2	ENSG00000102543	CDADC1	S2	ENSG00000185261	KIAA0825	U3	ENSG00000102678	FGF9	M5
ENSG00000102030	NAA10	F2	ENSG00000102547	CAB39L	S2	ENSG00000185267	CDNF	U3	ENSG00000102886	GDPD3	M5
ENSG00000102038	SMARCA1	F2	ENSG00000102554	KLF5	S2	ENSG00000185271	KLHL33	U3	ENSG00000103034	NDRG4	M5
ENSG00000102054	RBBP7	F2	ENSG00000102572	STK24	S2	ENSG00000185290	NUPR2	U3	ENSG00000103150	MLYCD	M5
ENSG00000102057	KCND1	F2	ENSG00000102580	DNAJC3	S2	ENSG00000185340	GAS2L1	U3	ENSG00000103194	USP10	M5
ENSG00000102078	SLC25A14	F2	ENSG00000102595	UGGT2	S2	ENSG00000185344	ATP6V0A2	U3	ENSG00000103254	ANTKMT	M5
ENSG00000102081	FMR1	F2	ENSG00000102678	FGF9	S2	ENSG00000185420	SMYD3	U3	ENSG00000103275	UBE2I	M5
ENSG00000102100	SLC35A2	F2	ENSG00000102699	PARP4	S2	ENSG00000185482	STAC3	U3	ENSG00000103496	STX4	M5
ENSG00000102103	PQBP1	F2	ENSG00000102710	SUPT20H	S2	ENSG00000185507	IRF7	U3	ENSG00000103852	TTC23	M5
ENSG00000102109	PCSK1N	F2	ENSG00000102738	MRPS31	S2	ENSG00000185608	MRPL40	U3	ENSG00000104093	DMXL2	M5
ENSG00000102119	EMD	F2	ENSG00000102743	SLC25A15	S2	ENSG00000185716	MOSMO	U3	ENSG00000104142	VPS18	M5
ENSG00000102125	TAFAZZIN	F2	ENSG00000102753	KPNA3	S2	ENSG00000185800	DMWD	U3	ENSG00000104375	STK3	M5
ENSG00000102144	PGK1	F2	ENSG00000102755	FLT1	S2	ENSG00000185860	CCDC190	U3	ENSG00000104381	GDAP1	M5
ENSG00000102178	UBL4A	F2	ENSG00000102763	VWA8	S2	ENSG00000186017	ZNF566	U3	ENSG00000104472	CHRAC1	M5
ENSG00000102189	EEA1	F2	ENSG00000102780	DGKH	S2	ENSG00000186063	AIDA	U3	ENSG00000104643	MTMR9	M5
ENSG00000102218	RP2	F2	ENSG00000102781	KATNAL1	S2	ENSG00000186166	CENATAC	U3	ENSG00000104728	ARHGEF10	M5
ENSG00000102221	JADE3	F2	ENSG00000102802	MEDAG	S2	ENSG00000186184	POLR1D	U3	ENSG00000104835	SARS2	M5
ENSG00000102241	HTATSF1	F2	ENSG00000102804	TSC22D1	S2	ENSG00000186231	KLHL32	U3	ENSG00000104960	PTOV1	M5
ENSG00000102265	TIMP1	F2	ENSG00000102805	CLN5	S2	ENSG00000186298	PPP1CC	U3	ENSG00000105220	GPI	M5
ENSG00000102302	FGD1	F2	ENSG00000102858	MGRN1	S2	ENSG00000186642	PDE2A	U3	ENSG00000105287	PRKD2	M5
ENSG00000102309	PIN4	F2	ENSG00000102870	ZNF629	S2	ENSG00000186732	MPPED1	U3	ENSG00000105321	CCDC9	M5
ENSG00000102312	PORCN	F2	ENSG00000102878	HSF4	S2	ENSG00000186806	VSIG10L	U3	ENSG00000105323	HNRNPUL1	M5
ENSG00000102316	MAGED2	F2	ENSG00000102882	MAPK3	S2	ENSG00000186994	KANK3	U3	ENSG00000105402	NAPA	M5
ENSG00000102349	KLF8	F2	ENSG00000102893	PHKB	S2	ENSG00000186998	EMID1	U3	ENSG00000105486	LIG1	M5
ENSG00000102359	SRPX2	F2	ENSG00000102897	LYRM1	S2	ENSG00000187527	ATP13A5	U3	ENSG00000105516	DBP	M5
ENSG00000102385	DRP2	F2	ENSG00000102908	NFAT5	S2	ENSG00000187772	LIN28B	U3	ENSG00000105552	BCAT2	M5
ENSG00000102390	PBDC1	F2	ENSG00000102910	LONP2	S2	ENSG00000187796	CARD9	U3	ENSG00000105784	RUNDC3B	M5
ENSG00000102393	GLA	F2	ENSG00000102921	N4BP1	S2	ENSG00000188064	WNT7B	U3	ENSG00000105887	MTPN	M5
ENSG00000102401	ARMCX3	F2	ENSG00000102924	CBLN1	S2	ENSG00000188419	CHM	U3	ENSG00000106100	NOD1	M5
ENSG00000102452	NALCN	F2	ENSG00000102931	ARL2BP	S2	ENSG00000188529	SRSF10	U3	ENSG00000106299	WASL	M5
ENSG00000102468	HTR2A	F2	ENSG00000102935	ZNF423	S2	ENSG00000188542	DUSP28	U3	ENSG00000106344	RBM28	M5
ENSG00000102524	TNFSF13B	F2	ENSG00000102967	DHODH	S2	ENSG00000188612	SUMO2	U3	ENSG00000106367	AP1S1	M5
ENSG00000102531	FNDC3A	F2	ENSG00000102974	CTCF	S2	ENSG00000188846	RPL14	U3	ENSG00000106443	PHF14	M5
ENSG00000102547	CAB39L	F2	ENSG00000103018	CYB5B	S2	ENSG00000189306	RRP7A	U3	ENSG00000106459	NRF1	M5
ENSG00000102554	KLF5	F2	ENSG00000103034	NDRG4	S2	ENSG00000196072	BLOC1S2	U3	ENSG00000106624	AEBP1	M5
ENSG00000102572	STK24	F2	ENSG00000103035	PSMD7	S2	ENSG00000196151	WDSUB1	U3	ENSG00000106686	SPATA6L	M5
ENSG00000102595	UGGT2	F2	ENSG00000103042	SLC38A7	S2	ENSG00000196189	SEMA4A	U3	ENSG00000106688	SLC1A1	M5
ENSG00000102699	PARP4	F2	ENSG00000103043	VAC14	S2	ENSG00000196358	NTNG2	U3	ENSG00000106723	SPIN1	M5
ENSG00000102710	SUPT20H	F2	ENSG00000103047	TANGO6	S2	ENSG00000196428	TSC22D2	U3	ENSG00000107560	RAB11FIP2	M5
ENSG00000102743	SLC25A15	F2	ENSG00000103056	SMPD3	S2	ENSG00000196517	SLC6A9	U3	ENSG00000107643	MAPK8	M5
ENSG00000102753	KPNA3	F2	ENSG00000103064	SLC7A6	S2	ENSG00000196549	MME	U3	ENSG00000107745	MICU1	M5
ENSG00000102786	INTS6	F2	ENSG00000103091	WDR59	S2	ENSG00000196663	TECPR2	U3	ENSG00000107863	ARHGAP21	M5
ENSG00000102802	MEDAG	F2	ENSG00000103111	MON1B	S2	ENSG00000196664	TLR7	U3	ENSG00000107951	MTPAP	M5
ENSG00000102804	TSC22D1	F2	ENSG00000103154	NECAB2	S2	ENSG00000196743	GM2A	U3	ENSG00000107959	PITRM1	M5
ENSG00000102805	CLN5	F2	ENSG00000103160	HSDL1	S2	ENSG00000196782	MAML3	U3	ENSG00000108384	RAD51C	M5
ENSG00000102870	ZNF629	F2	ENSG00000103174	NAGPA	S2	ENSG00000196850	PPTC7	U3	ENSG00000108395	TRIM37	M5
ENSG00000102871	TRADD	F2	ENSG00000103187	COTL1	S2	ENSG00000197323	TRIM33	U3	ENSG00000108590	MED31	M5
ENSG00000102878	HSF4	F2	ENSG00000103202	NME4	S2	ENSG00000197343	ZNF655	U3	ENSG00000108641	B9D1	M5
ENSG00000102879	CORO1A	F2	ENSG00000103222	ABCC1	S2	ENSG00000197562	RAB40C	U3	ENSG00000108848	LUC7L3	M5
ENSG00000102882	MAPK3	F2	ENSG00000103249	CLCN7	S2	ENSG00000197728	RPS26	U3	ENSG00000109171	SLAIN2	M5
ENSG00000102886	GDPD3	F2	ENSG00000103257	SLC7A5	S2	ENSG00000197746	PSAP	U3	ENSG00000109320	NFKB1	M5
ENSG00000102890	ELMO3	F2	ENSG00000103264	FBXO31	S2	ENSG00000197776	KLHDC1	U3	ENSG00000109436	TBC1D9	M5
ENSG00000102893	PHKB	F2	ENSG00000103275	UBE2I	S2	ENSG00000197859	ADAMTSL2	U3	ENSG00000109738	GLRB	M5
ENSG00000102908	NFAT5	F2	ENSG00000103316	CRYM	S2	ENSG00000197958	RPL12	U3	ENSG00000109832	DDX25	M5
ENSG00000102910	LONP2	F2	ENSG00000103319	EEF2K	S2	ENSG00000198034	RPS4X	U3	ENSG00000109920	FNBP4	M5
ENSG00000102931	ARL2BP	F2	ENSG00000103335	PIEZO1	S2	ENSG00000198055	GRK6	U3	ENSG00000110074	FOXRED1	M5
ENSG00000102974	CTCF	F2	ENSG00000103342	GSPT1	S2	ENSG00000198089	SFI1	U3	ENSG00000110107	PRPF19	M5
ENSG00000102977	ACD	F2	ENSG00000103343	ZNF174	S2	ENSG00000198105	ZNF248	U3	ENSG00000110218	PANX1	M5
ENSG00000102978	POLR2C	F2	ENSG00000103353	UBFD1	S2	ENSG00000198189	HSD17B11	U3	ENSG00000110422	HIPK3	M5
ENSG00000102981	PARD6A	F2	ENSG00000103356	EARS2	S2	ENSG00000198242	RPL23A	U3	ENSG00000110651	CD81	M5
ENSG00000103018	CYB5B	F2	ENSG00000103365	GGA2	S2	ENSG00000198431	TXNRD1	U3	ENSG00000110693	SOX6	M5
ENSG00000103021	CCDC113	F2	ENSG00000103381	CPPED1	S2	ENSG00000198712	MT-CO2	U3	ENSG00000111052	LIN7A	M5
ENSG00000103034	NDRG4	F2	ENSG00000103404	USP31	S2	ENSG00000198752	CDC42BPB	U3	ENSG00000111224	PARP11	M5
ENSG00000103035	PSMD7	F2	ENSG00000103423	DNAJA3	S2	ENSG00000198755	RPL10A	U3	ENSG00000111262	KCNA1	M5
ENSG00000103037	SETD6	F2	ENSG00000103429	BFAR	S2	ENSG00000198780	FAM169A	U3	ENSG00000111275	ALDH2	M5
ENSG00000103042	SLC38A7	F2	ENSG00000103460	TOX3	S2	ENSG00000198791	CNOT7	U3	ENSG00000111554	MDM1	M5
ENSG00000103044	HAS3	F2	ENSG00000103479	RBL2	S2	ENSG00000198840	MT-ND3	U3	ENSG00000111671	SPSB2	M5
ENSG00000103051	COG4	F2	ENSG00000103489	XYLT1	S2	ENSG00000198843	SELENOT	U3	ENSG00000111674	ENO2	M5
ENSG00000103056	SMPD3	F2	ENSG00000103494	RPGRIP1L	S2	ENSG00000198892	SHISA4	U3	ENSG00000111684	LPCAT3	M5
ENSG00000103066	PLA2G15	F2	ENSG00000103528	SYT17	S2	ENSG00000198894	CIPC	U3	ENSG00000111790	FGFR1OP2	M5
ENSG00000103091	WDR59	F2	ENSG00000103544	VPS35L	S2	ENSG00000198899	MT-ATP6	U3	ENSG00000112062	MAPK14	M5
ENSG00000103111	MON1B	F2	ENSG00000103550	KNOP1	S2	ENSG00000198911	SREBF2	U3	ENSG00000112186	CAP2	M5
ENSG00000103126	AXIN1	F2	ENSG00000103569	AQP9	S2	ENSG00000198918	RPL39	U3	ENSG00000112280	COL9A1	M5
ENSG00000103145	HCFC1R1	F2	ENSG00000103591	AAGAB	S2	ENSG00000198938	MT-CO3	U3	ENSG00000112640	PPP2R5D	M5
ENSG00000103148	NPRL3	F2	ENSG00000103642	LACTB	S2	ENSG00000204060	FOXO6	U3	ENSG00000112655	PTK7	M5
ENSG00000103150	MLYCD	F2	ENSG00000103653	CSK	S2	ENSG00000204070	SYS1	U3	ENSG00000112701	SENP6	M5
ENSG00000103152	MPG	F2	ENSG00000103657	HERC1	S2	ENSG00000204231	RXRB	U3	ENSG00000112759	SLC29A1	M5
ENSG00000103160	HSDL1	F2	ENSG00000103671	TRIP4	S2	ENSG00000204256	BRD2	U3	ENSG00000113070	HBEGF	M5
ENSG00000103168	TAF1C	F2	ENSG00000103707	MTFMT	S2	ENSG00000204304	PBX2	U3	ENSG00000113231	PDE8B	M5
ENSG00000103174	NAGPA	F2	ENSG00000103710	RASL12	S2	ENSG00000204308	RNF5	U3	ENSG00000113327	GABRG2	M5
ENSG00000103175	WFDC1	F2	ENSG00000103723	AP3B2	S2	ENSG00000204315	FKBPL	U3	ENSG00000113360	DROSHA	M5
ENSG00000103194	USP10	F2	ENSG00000103742	IGDCC4	S2	ENSG00000204356	NELFE	U3	ENSG00000113361	CDH6	M5
ENSG00000103196	CRISPLD2	F2	ENSG00000103769	RAB11A	S2	ENSG00000204519	ZNF551	U3	ENSG00000113504	SLC12A7	M5
ENSG00000103197	TSC2	F2	ENSG00000103811	CTSH	S2	ENSG00000204564	C6orf136	U3	ENSG00000113575	PPP2CA	M5
ENSG00000103202	NME4	F2	ENSG00000103855	CD276	S2	ENSG00000204628	RACK1	U3	ENSG00000114021	NIT2	M5
ENSG00000103222	ABCC1	F2	ENSG00000103876	FAH	S2	ENSG00000204653	ASPDH	U3	ENSG00000114030	KPNA1	M5
ENSG00000103227	LMF1	F2	ENSG00000103888	CEMIP	S2	ENSG00000204843	DCTN1	U3	ENSG00000114115	RBP1	M5
ENSG00000103245	CIAO3	F2	ENSG00000103942	HOMER2	S2	ENSG00000204899	MZT1	U3	ENSG00000114251	WNT5A	M5
ENSG00000103248	MTHFSD	F2	ENSG00000103966	EHD4	S2	ENSG00000205084	TMEM231	U3	ENSG00000114279	FGF12	M5
ENSG00000103249	CLCN7	F2	ENSG00000103978	TMEM87A	S2	ENSG00000205302	SNX2	U3	ENSG00000114573	ATP6V1A	M5
ENSG00000103253	HAGHL	F2	ENSG00000103994	ZNF106	S2	ENSG00000205835	GMNC	U3	ENSG00000114650	SCAP	M5
ENSG00000103254	ANTKMT	F2	ENSG00000103995	CEP152	S2	ENSG00000206432	TMEM200C	U3	ENSG00000115252	PDE1A	M5
ENSG00000103257	SLC7A5	F2	ENSG00000104047	DTWD1	S2	ENSG00000211455	STK38L	U3	ENSG00000115419	GLS	M5
ENSG00000103264	FBXO31	F2	ENSG00000104059	ENTREP2	S2	ENSG00000211456	SACM1L	U3	ENSG00000115461	IGFBP5	M5
ENSG00000103266	STUB1	F2	ENSG00000104064	GABPB1	S2	ENSG00000212864	RNF208	U3	ENSG00000115486	GGCX	M5
ENSG00000103269	RHBDL1	F2	ENSG00000104067	TJP1	S2	ENSG00000212907	MT-ND4L	U3	ENSG00000115750	TAF1B	M5
ENSG00000103274	NUBP1	F2	ENSG00000104093	DMXL2	S2	ENSG00000213339	QTRT1	U3	ENSG00000115828	QPCT	M5
ENSG00000103275	UBE2I	F2	ENSG00000104112	SCG3	S2	ENSG00000213397	HAUS7	U3	ENSG00000115839	RAB3GAP1	M5
ENSG00000103319	EEF2K	F2	ENSG00000104140	RHOV	S2	ENSG00000213463	SYNJ2BP	U3	ENSG00000115966	ATF2	M5
ENSG00000103326	CAPN15	F2	ENSG00000104142	VPS18	S2	ENSG00000213593	TMX2	U3	ENSG00000116133	DHCR24	M5
ENSG00000103342	GSPT1	F2	ENSG00000104154	SLC30A4	S2	ENSG00000213619	NDUFS3	U3	ENSG00000116151	MORN1	M5
ENSG00000103343	ZNF174	F2	ENSG00000104164	BLOC1S6	S2	ENSG00000213639	PPP1CB	U3	ENSG00000116199	FAM20B	M5
ENSG00000103351	CLUAP1	F2	ENSG00000104205	SGK3	S2	ENSG00000213741	RPS29	U3	ENSG00000116260	QSOX1	M5
ENSG00000103353	UBFD1	F2	ENSG00000104218	CSPP1	S2	ENSG00000214113	LYRM4	U3	ENSG00000116299	ELAPOR1	M5
ENSG00000103356	EARS2	F2	ENSG00000104219	ZDHHC2	S2	ENSG00000214655	ZSWIM8	U3	ENSG00000116350	SRSF4	M5
ENSG00000103363	ELOB	F2	ENSG00000104228	TRIM35	S2	ENSG00000215712	TMEM242	U3	ENSG00000116675	DNAJC6	M5
ENSG00000103381	CPPED1	F2	ENSG00000104231	ZFAND1	S2	ENSG00000218739	CEBPZOS	U3	ENSG00000116857	TMEM9	M5
ENSG00000103404	USP31	F2	ENSG00000104290	FZD3	S2	ENSG00000218891	ZNF579	U3	ENSG00000116903	EXOC8	M5
ENSG00000103415	HMOX2	F2	ENSG00000104299	INTS9	S2	ENSG00000221829	FANCG	U3	ENSG00000117360	PRPF3	M5
ENSG00000103423	DNAJA3	F2	ENSG00000104312	RIPK2	S2	ENSG00000221926	TRIM16	U3	ENSG00000117425	PTCH2	M5
ENSG00000103429	BFAR	F2	ENSG00000104320	NBN	S2	ENSG00000222009	BTBD19	U3	ENSG00000117505	DR1	M5
ENSG00000103449	SALL1	F2	ENSG00000104324	CPQ	S2	ENSG00000222011	FAM185A	U3	ENSG00000117616	RSRP1	M5
ENSG00000103460	TOX3	F2	ENSG00000104325	DECR1	S2	ENSG00000224877	NDUFAF8	U3	ENSG00000117707	PROX1	M5
ENSG00000103479	RBL2	F2	ENSG00000104327	CALB1	S2	ENSG00000225526	MKRN2OS	U3	ENSG00000118007	STAG1	M5
ENSG00000103489	XYLT1	F2	ENSG00000104331	BPNT2	S2	ENSG00000228300	FAM174C	U3	ENSG00000118242	MREG	M5
ENSG00000103496	STX4	F2	ENSG00000104332	SFRP1	S2	ENSG00000229809	ZNF688	U3	ENSG00000118402	ELOVL4	M5
ENSG00000103502	CDIPT	F2	ENSG00000104341	LAPTM4B	S2	ENSG00000234127	TRIM26	U3	ENSG00000118407	FILIP1	M5
ENSG00000103507	BCKDK	F2	ENSG00000104343	UBE2W	S2	ENSG00000234545	FAM133B	U3	ENSG00000118515	SGK1	M5
ENSG00000103510	KAT8	F2	ENSG00000104356	POP1	S2	ENSG00000235750	KIAA0040	U3	ENSG00000118849	RARRES1	M5
ENSG00000103549	RNF40	F2	ENSG00000104361	NIPAL2	S2	ENSG00000237441	RGL2	U3	ENSG00000119397	CNTRL	M5
ENSG00000103550	KNOP1	F2	ENSG00000104365	IKBKB	S2	ENSG00000239305	RNF103	U3	ENSG00000119403	PHF19	M5
ENSG00000103591	AAGAB	F2	ENSG00000104368	PLAT	S2	ENSG00000240720	LRRD1	U3	ENSG00000119574	ZBTB45	M5
ENSG00000103642	LACTB	F2	ENSG00000104369	JPH1	S2	ENSG00000241058	NSUN6	U3	ENSG00000119638	NEK9	M5
ENSG00000103647	CORO2B	F2	ENSG00000104375	STK3	S2	ENSG00000241468	ATP5MF	U3	ENSG00000119777	TMEM214	M5
ENSG00000103653	CSK	F2	ENSG00000104381	GDAP1	S2	ENSG00000242173	ARHGDIG	U3	ENSG00000119778	ATAD2B	M5
ENSG00000103671	TRIP4	F2	ENSG00000104388	RAB2A	S2	ENSG00000243678	NME2	U3	ENSG00000119986	AVPI1	M5
ENSG00000103710	RASL12	F2	ENSG00000104408	EIF3E	S2	ENSG00000245848	CEBPA	U3	ENSG00000120251	GRIA2	M5
ENSG00000103723	AP3B2	F2	ENSG00000104412	EMC2	S2	ENSG00000249992	TMEM158	U3	ENSG00000120265	PCMT1	M5
ENSG00000103852	TTC23	F2	ENSG00000104415	CCN4	S2	ENSG00000257218	GATC	U3	ENSG00000120327	PCDHB14	M5
ENSG00000103978	TMEM87A	F2	ENSG00000104427	ZC2HC1A	S2	ENSG00000266412	NCOA4	U3	ENSG00000120526	NUDCD1	M5
ENSG00000103994	ZNF106	F2	ENSG00000104435	STMN2	S2	ENSG00000266967	AARSD1	U3	ENSG00000120647	CCDC77	M5
ENSG00000104059	ENTREP2	F2	ENSG00000104442	ARMC1	S2	ENSG00000267534	S1PR2	U3	ENSG00000120896	SORBS3	M5
ENSG00000104064	GABPB1	F2	ENSG00000104447	TRPS1	S2	ENSG00000267796	LIN37	U3	ENSG00000120942	UBIAD1	M5
ENSG00000104067	TJP1	F2	ENSG00000104450	SPAG1	S2	ENSG00000267909	CCDC177	U3	ENSG00000121005	CRISPLD1	M5
ENSG00000104081	BMF	F2	ENSG00000104472	CHRAC1	S2	ENSG00000268182	SMIM17	U3	ENSG00000121152	NCAPH	M5
ENSG00000104112	SCG3	F2	ENSG00000104490	NCALD	S2	ENSG00000272047	GTF2H5	U3	ENSG00000122507	BBS9	M5
ENSG00000104129	DNAJC17	F2	ENSG00000104497	SNX16	S2	ENSG00000272333	KMT2B	U3	ENSG00000122863	CHST3	M5
ENSG00000104133	SPG11	F2	ENSG00000104517	UBR5	S2	ENSG00000277399	GPR179	U3	ENSG00000122912	SLC25A16	M5
ENSG00000104140	RHOV	F2	ENSG00000104518	GSDMD	S2	ENSG00000001167	NFYA	U5	ENSG00000123178	SPRYD7	M5
ENSG00000104142	VPS18	F2	ENSG00000104522	GFUS	S2	ENSG00000001497	LAS1L	U5	ENSG00000123213	NLN	M5
ENSG00000104154	SLC30A4	F2	ENSG00000104549	SQLE	S2	ENSG00000002919	SNX11	U5	ENSG00000123416	TUBA1B	M5
ENSG00000104205	SGK3	F2	ENSG00000104613	INTS10	S2	ENSG00000002933	TMEM176A	U5	ENSG00000123570	RAB9B	M5
ENSG00000104213	PDGFRL	F2	ENSG00000104626	ERI1	S2	ENSG00000003987	MTMR7	U5	ENSG00000123983	ACSL3	M5
ENSG00000104218	CSPP1	F2	ENSG00000104635	SLC39A14	S2	ENSG00000004059	ARF5	U5	ENSG00000124151	NCOA3	M5
ENSG00000104221	BRF2	F2	ENSG00000104643	MTMR9	S2	ENSG00000004776	HSPB6	U5	ENSG00000124164	VAPB	M5
ENSG00000104228	TRIM35	F2	ENSG00000104660	LEPROTL1	S2	ENSG00000004848	ARX	U5	ENSG00000124198	ARFGEF2	M5
ENSG00000104231	ZFAND1	F2	ENSG00000104671	DCTN6	S2	ENSG00000004866	ST7	U5	ENSG00000124201	ZNFX1	M5
ENSG00000104290	FZD3	F2	ENSG00000104687	GSR	S2	ENSG00000004897	CDC27	U5	ENSG00000124209	RAB22A	M5
ENSG00000104312	RIPK2	F2	ENSG00000104691	UBXN8	S2	ENSG00000005100	DHX33	U5	ENSG00000124299	PEPD	M5
ENSG00000104320	NBN	F2	ENSG00000104695	PPP2CB	S2	ENSG00000005187	ACSM3	U5	ENSG00000124422	USP22	M5
ENSG00000104325	DECR1	F2	ENSG00000104731	KLHDC4	S2	ENSG00000006015	REX1BD	U5	ENSG00000124659	TBCC	M5
ENSG00000104343	UBE2W	F2	ENSG00000104738	MCM4	S2	ENSG00000006062	MAP3K14	U5	ENSG00000124795	DEK	M5
ENSG00000104356	POP1	F2	ENSG00000104756	KCTD9	S2	ENSG00000006118	TMEM132A	U5	ENSG00000125166	GOT2	M5
ENSG00000104361	NIPAL2	F2	ENSG00000104763	ASAH1	S2	ENSG00000006377	DLX6	U5	ENSG00000125354	SEPTIN6	M5
ENSG00000104368	PLAT	F2	ENSG00000104765	BNIP3L	S2	ENSG00000006432	MAP3K9	U5	ENSG00000125398	SOX9	M5
ENSG00000104369	JPH1	F2	ENSG00000104774	MAN2B1	S2	ENSG00000006451	RALA	U5	ENSG00000125633	CCDC93	M5
ENSG00000104375	STK3	F2	ENSG00000104824	HNRNPL	S2	ENSG00000006453	BAIAP2L1	U5	ENSG00000125686	MED1	M5
ENSG00000104415	CCN4	F2	ENSG00000104872	PIH1D1	S2	ENSG00000006695	COX10	U5	ENSG00000125814	NAPB	M5
ENSG00000104447	TRPS1	F2	ENSG00000104880	ARHGEF18	S2	ENSG00000006704	GTF2IRD1	U5	ENSG00000125821	DTD1	M5
ENSG00000104450	SPAG1	F2	ENSG00000104881	PPP1R13L	S2	ENSG00000007255	TRAPPC6A	U5	ENSG00000125835	SNRPB	M5
ENSG00000104472	CHRAC1	F2	ENSG00000104967	NOVA2	S2	ENSG00000008118	CAMK1G	U5	ENSG00000125885	MCM8	M5
ENSG00000104517	UBR5	F2	ENSG00000105058	FAM32A	S2	ENSG00000008256	CYTH3	U5	ENSG00000125895	TMEM74B	M5
ENSG00000104522	GFUS	F2	ENSG00000105085	MED26	S2	ENSG00000008324	SS18L2	U5	ENSG00000126001	CEP250	M5
ENSG00000104524	PYCR3	F2	ENSG00000105122	RASAL3	S2	ENSG00000008438	PGLYRP1	U5	ENSG00000126733	DACH2	M5
ENSG00000104529	EEF1D	F2	ENSG00000105135	ILVBL	S2	ENSG00000008988	RPS20	U5	ENSG00000126773	PCNX4	M5
ENSG00000104613	INTS10	F2	ENSG00000105143	SLC1A6	S2	ENSG00000009724	MASP2	U5	ENSG00000127561	SYNGR3	M5
ENSG00000104626	ERI1	F2	ENSG00000105176	URI1	S2	ENSG00000009780	FAM76A	U5	ENSG00000127824	TUBA4A	M5
ENSG00000104635	SLC39A14	F2	ENSG00000105251	SHD	S2	ENSG00000010017	RANBP9	U5	ENSG00000128045	RASL11B	M5
ENSG00000104671	DCTN6	F2	ENSG00000105287	PRKD2	S2	ENSG00000010292	NCAPD2	U5	ENSG00000128059	PPAT	M5
ENSG00000104679	R3HCC1	F2	ENSG00000105323	HNRNPUL1	S2	ENSG00000010310	GIPR	U5	ENSG00000129636	ITFG1	M5
ENSG00000104687	GSR	F2	ENSG00000105325	FZR1	S2	ENSG00000010318	PHF7	U5	ENSG00000130158	DOCK6	M5
ENSG00000104691	UBXN8	F2	ENSG00000105339	DENND3	S2	ENSG00000011007	ELOA	U5	ENSG00000130175	PRKCSH	M5
ENSG00000104695	PPP2CB	F2	ENSG00000105376	ICAM5	S2	ENSG00000011009	LYPLA2	U5	ENSG00000130176	CNN1	M5
ENSG00000104731	KLHDC4	F2	ENSG00000105409	ATP1A3	S2	ENSG00000011132	APBA3	U5	ENSG00000130449	ZSWIM6	M5
ENSG00000104756	KCTD9	F2	ENSG00000105438	KDELR1	S2	ENSG00000011260	UTP18	U5	ENSG00000130540	SULT4A1	M5
ENSG00000104763	ASAH1	F2	ENSG00000105447	GRWD1	S2	ENSG00000011275	RNF216	U5	ENSG00000130560	UBAC1	M5
ENSG00000104765	BNIP3L	F2	ENSG00000105472	CLEC11A	S2	ENSG00000011451	WIZ	U5	ENSG00000130589	HELZ2	M5
ENSG00000104774	MAN2B1	F2	ENSG00000105486	LIG1	S2	ENSG00000011600	TYROBP	U5	ENSG00000130592	LSP1	M5
ENSG00000104805	NUCB1	F2	ENSG00000105514	RAB3D	S2	ENSG00000012779	ALOX5	U5	ENSG00000130643	CALY	M5
ENSG00000104812	GYS1	F2	ENSG00000105576	TNPO2	S2	ENSG00000013375	PGM3	U5	ENSG00000130770	ATP5IF1	M5
ENSG00000104814	MAP4K1	F2	ENSG00000105612	DNASE2	S2	ENSG00000013523	ANGEL1	U5	ENSG00000130827	PLXNA3	M5
ENSG00000104823	ECH1	F2	ENSG00000105662	CRTC1	S2	ENSG00000013583	HEBP1	U5	ENSG00000130956	HABP4	M5
ENSG00000104824	HNRNPL	F2	ENSG00000105699	LSR	S2	ENSG00000014138	POLA2	U5	ENSG00000131013	PPIL4	M5
ENSG00000104825	NFKBIB	F2	ENSG00000105705	SUGP1	S2	ENSG00000014216	CAPN1	U5	ENSG00000131100	ATP6V1E1	M5
ENSG00000104835	SARS2	F2	ENSG00000105722	ERF	S2	ENSG00000015475	BID	U5	ENSG00000131437	KIF3A	M5
ENSG00000104852	SNRNP70	F2	ENSG00000105723	GSK3A	S2	ENSG00000015532	XYLT2	U5	ENSG00000131462	TUBG1	M5
ENSG00000104853	CLPTM1	F2	ENSG00000105732	ZNF574	S2	ENSG00000018280	SLC11A1	U5	ENSG00000131480	AOC2	M5
ENSG00000104856	RELB	F2	ENSG00000105738	SIPA1L3	S2	ENSG00000018869	ZNF582	U5	ENSG00000131507	NDFIP1	M5
ENSG00000104859	CLASRP	F2	ENSG00000105778	AVL9	S2	ENSG00000019102	VSIG2	U5	ENSG00000131558	EXOC4	M5
ENSG00000104870	FCGRT	F2	ENSG00000105784	RUNDC3B	S2	ENSG00000020181	ADGRA2	U5	ENSG00000132205	EMILIN2	M5
ENSG00000104872	PIH1D1	F2	ENSG00000105792	CFAP69	S2	ENSG00000020922	MRE11	U5	ENSG00000132549	VPS13B	M5
ENSG00000104880	ARHGEF18	F2	ENSG00000105793	GTPBP10	S2	ENSG00000021762	OSBPL5	U5	ENSG00000132613	MTSS2	M5
ENSG00000104881	PPP1R13L	F2	ENSG00000105810	CDK6	S2	ENSG00000023445	BIRC3	U5	ENSG00000132718	SYT11	M5
ENSG00000104883	PEX11G	F2	ENSG00000105819	PMPCB	S2	ENSG00000023516	AKAP11	U5	ENSG00000132821	VSTM2L	M5
ENSG00000104884	ERCC2	F2	ENSG00000105821	DNAJC2	S2	ENSG00000023697	DERA	U5	ENSG00000132975	GPR12	M5
ENSG00000104885	DOT1L	F2	ENSG00000105835	NAMPT	S2	ENSG00000023902	PLEKHO1	U5	ENSG00000133083	DCLK1	M5
ENSG00000104886	PLEKHJ1	F2	ENSG00000105849	POLR1F	S2	ENSG00000025156	HSF2	U5	ENSG00000133315	MACROD1	M5
ENSG00000104888	SLC17A7	F2	ENSG00000105851	PIK3CG	S2	ENSG00000025708	TYMP	U5	ENSG00000133318	RTN3	M5
ENSG00000104894	CD37	F2	ENSG00000105852	PON3	S2	ENSG00000025772	TOMM34	U5	ENSG00000133422	MORC2	M5
ENSG00000104897	SF3A2	F2	ENSG00000105854	PON2	S2	ENSG00000025796	SEC63	U5	ENSG00000133597	ADCK2	M5
ENSG00000104904	OAZ1	F2	ENSG00000105855	ITGB8	S2	ENSG00000025800	KPNA6	U5	ENSG00000133740	E2F5	M5
ENSG00000104907	TRMT1	F2	ENSG00000105856	HBP1	S2	ENSG00000027847	B4GALT7	U5	ENSG00000133789	SWAP70	M5
ENSG00000104936	DMPK	F2	ENSG00000105865	DUS4L	S2	ENSG00000029363	BCLAF1	U5	ENSG00000133805	AMPD3	M5
ENSG00000104946	TBC1D17	F2	ENSG00000105866	SP4	S2	ENSG00000030066	NUP160	U5	ENSG00000134108	ARL8B	M5
ENSG00000104957	YJU2B	F2	ENSG00000105875	WDR91	S2	ENSG00000032742	IFT88	U5	ENSG00000134121	CHL1	M5
ENSG00000104960	PTOV1	F2	ENSG00000105879	CBLL1	S2	ENSG00000033100	CHPF2	U5	ENSG00000134321	RSAD2	M5
ENSG00000104964	TLE5	F2	ENSG00000105880	DLX5	S2	ENSG00000034152	MAP2K3	U5	ENSG00000134376	CRB1	M5
ENSG00000104969	SGTA	F2	ENSG00000105887	MTPN	S2	ENSG00000034693	PEX3	U5	ENSG00000134864	GGACT	M5
ENSG00000104979	C19orf53	F2	ENSG00000105926	PALS2	S2	ENSG00000037280	FLT4	U5	ENSG00000134954	ETS1	M5
ENSG00000104980	TIMM44	F2	ENSG00000105939	ZC3HAV1	S2	ENSG00000037897	METTL1	U5	ENSG00000135315	CEP162	M5
ENSG00000104983	CCDC61	F2	ENSG00000105948	TTC26	S2	ENSG00000038002	AGA	U5	ENSG00000135597	REPS1	M5
ENSG00000105058	FAM32A	F2	ENSG00000105953	OGDH	S2	ENSG00000038427	VCAN	U5	ENSG00000135837	CEP350	M5
ENSG00000105063	PPP6R1	F2	ENSG00000105971	CAV2	S2	ENSG00000040199	PHLPP2	U5	ENSG00000136193	SCRN1	M5
ENSG00000105085	MED26	F2	ENSG00000105974	CAV1	S2	ENSG00000042813	ZPBP	U5	ENSG00000136404	TM6SF1	M5
ENSG00000105088	OLFM2	F2	ENSG00000105982	RNF32	S2	ENSG00000043514	TRIT1	U5	ENSG00000136531	SCN2A	M5
ENSG00000105122	RASAL3	F2	ENSG00000105983	LMBR1	S2	ENSG00000046647	GEMIN8	U5	ENSG00000136643	RPS6KC1	M5
ENSG00000105127	AKAP8	F2	ENSG00000105989	WNT2	S2	ENSG00000047648	ARHGAP6	U5	ENSG00000136830	NIBAN2	M5
ENSG00000105171	POP4	F2	ENSG00000105993	DNAJB6	S2	ENSG00000047932	GOPC	U5	ENSG00000137193	PIM1	M5
ENSG00000105173	CCNE1	F2	ENSG00000106018	VIPR2	S2	ENSG00000049167	ERCC8	U5	ENSG00000137207	YIPF3	M5
ENSG00000105176	URI1	F2	ENSG00000106025	TSPAN12	S2	ENSG00000049656	CLPTM1L	U5	ENSG00000137474	MYO7A	M5
ENSG00000105186	ANKRD27	F2	ENSG00000106028	SSBP1	S2	ENSG00000050628	PTGER3	U5	ENSG00000137497	NUMA1	M5
ENSG00000105193	RPS16	F2	ENSG00000106034	CPED1	S2	ENSG00000051523	CYBA	U5	ENSG00000137693	YAP1	M5
ENSG00000105197	TIMM50	F2	ENSG00000106049	HIBADH	S2	ENSG00000052723	SIKE1	U5	ENSG00000137806	NDUFAF1	M5
ENSG00000105202	FBL	F2	ENSG00000106052	TAX1BP1	S2	ENSG00000053372	MRTO4	U5	ENSG00000137936	BCAR3	M5
ENSG00000105204	DYRK1B	F2	ENSG00000106070	GRB10	S2	ENSG00000054148	PHPT1	U5	ENSG00000138002	IFT172	M5
ENSG00000105220	GPI	F2	ENSG00000106078	COBL	S2	ENSG00000054267	ARID4B	U5	ENSG00000138018	SELENOI	M5
ENSG00000105223	PLD3	F2	ENSG00000106080	FKBP14	S2	ENSG00000054983	GALC	U5	ENSG00000138028	CGREF1	M5
ENSG00000105229	PIAS4	F2	ENSG00000106086	PLEKHA8	S2	ENSG00000056736	IL17RB	U5	ENSG00000138434	ITPRID2	M5
ENSG00000105245	NUMBL	F2	ENSG00000106100	NOD1	S2	ENSG00000057657	PRDM1	U5	ENSG00000138769	CDKL2	M5
ENSG00000105248	YJU2	F2	ENSG00000106105	GARS1	S2	ENSG00000058804	NDC1	U5	ENSG00000138867	GUCD1	M5
ENSG00000105254	TBCB	F2	ENSG00000106113	CRHR2	S2	ENSG00000059122	FLYWCH1	U5	ENSG00000139436	GIT2	M5
ENSG00000105255	FSD1	F2	ENSG00000106123	EPHB6	S2	ENSG00000059377	TBXAS1	U5	ENSG00000139970	RTN1	M5
ENSG00000105258	POLR2I	F2	ENSG00000106125	MINDY4	S2	ENSG00000059588	TARBP1	U5	ENSG00000140511	HAPLN3	M5
ENSG00000105281	SLC1A5	F2	ENSG00000106144	CASP2	S2	ENSG00000059691	GATB	U5	ENSG00000140682	TGFB1I1	M5
ENSG00000105290	APLP1	F2	ENSG00000106244	PDAP1	S2	ENSG00000059769	DNAJC25	U5	ENSG00000140873	ADAMTS18	M5
ENSG00000105298	CACTIN	F2	ENSG00000106246	PTCD1	S2	ENSG00000060138	YBX3	U5	ENSG00000140876	NUDT7	M5
ENSG00000105321	CCDC9	F2	ENSG00000106261	ZKSCAN1	S2	ENSG00000061656	SPAG4	U5	ENSG00000140988	RPS2	M5
ENSG00000105325	FZR1	F2	ENSG00000106278	PTPRZ1	S2	ENSG00000062370	ZNF112	U5	ENSG00000141012	GALNS	M5
ENSG00000105327	BBC3	F2	ENSG00000106299	WASL	S2	ENSG00000062650	WAPL	U5	ENSG00000141279	NPEPPS	M5
ENSG00000105341	DMAC2	F2	ENSG00000106327	TFR2	S2	ENSG00000062725	APPBP2	U5	ENSG00000141560	FN3KRP	M5
ENSG00000105364	MRPL4	F2	ENSG00000106346	USP42	S2	ENSG00000063169	BICRA	U5	ENSG00000141699	RETREG3	M5
ENSG00000105372	RPS19	F2	ENSG00000106351	AGFG2	S2	ENSG00000063761	ADCK1	U5	ENSG00000142197	DOP1B	M5
ENSG00000105373	NOP53	F2	ENSG00000106355	LSM5	S2	ENSG00000064309	CDON	U5	ENSG00000142230	SAE1	M5
ENSG00000105376	ICAM5	F2	ENSG00000106392	C1GALT1	S2	ENSG00000064932	SBNO2	U5	ENSG00000142686	C1orf216	M5
ENSG00000105379	ETFB	F2	ENSG00000106415	GLCCI1	S2	ENSG00000065054	SLC9A3R2	U5	ENSG00000143079	CTTNBP2NL	M5
ENSG00000105393	BABAM1	F2	ENSG00000106443	PHF14	S2	ENSG00000065325	GLP2R	U5	ENSG00000143147	GPR161	M5
ENSG00000105401	CDC37	F2	ENSG00000106460	TMEM106B	S2	ENSG00000065413	ANKRD44	U5	ENSG00000143157	POGK	M5
ENSG00000105402	NAPA	F2	ENSG00000106462	EZH2	S2	ENSG00000065457	ADAT1	U5	ENSG00000143502	SUSD4	M5
ENSG00000105404	RABAC1	F2	ENSG00000106477	CEP41	S2	ENSG00000065621	GSTO2	U5	ENSG00000143545	RAB13	M5
ENSG00000105409	ATP1A3	F2	ENSG00000106484	MEST	S2	ENSG00000065833	ME1	U5	ENSG00000143786	CNIH3	M5
ENSG00000105419	MEIS3	F2	ENSG00000106524	ANKMY2	S2	ENSG00000066136	NFYC	U5	ENSG00000143970	ASXL2	M5
ENSG00000105429	MEGF8	F2	ENSG00000106536	POU6F2	S2	ENSG00000066230	SLC9A3	U5	ENSG00000144043	TEX261	M5
ENSG00000105438	KDELR1	F2	ENSG00000106537	TSPAN13	S2	ENSG00000066651	TRMT11	U5	ENSG00000144182	LIPT1	M5
ENSG00000105443	CYTH2	F2	ENSG00000106546	AHR	S2	ENSG00000067057	PFKP	U5	ENSG00000144476	ACKR3	M5
ENSG00000105447	GRWD1	F2	ENSG00000106571	GLI3	S2	ENSG00000067167	TRAM1	U5	ENSG00000144535	DIS3L2	M5
ENSG00000105472	CLEC11A	F2	ENSG00000106588	PSMA2	S2	ENSG00000067177	PHKA1	U5	ENSG00000144589	STK11IP	M5
ENSG00000105486	LIG1	F2	ENSG00000106591	MRPL32	S2	ENSG00000067182	TNFRSF1A	U5	ENSG00000144591	GMPPA	M5
ENSG00000105509	HAS1	F2	ENSG00000106608	URGCP	S2	ENSG00000067365	METTL22	U5	ENSG00000144635	DYNC1LI1	M5
ENSG00000105516	DBP	F2	ENSG00000106609	TMEM248	S2	ENSG00000067533	RRP15	U5	ENSG00000144647	POMGNT2	M5
ENSG00000105518	TMEM205	F2	ENSG00000106617	PRKAG2	S2	ENSG00000068001	HYAL2	U5	ENSG00000144834	TAGLN3	M5
ENSG00000105556	MIER2	F2	ENSG00000106624	AEBP1	S2	ENSG00000068097	HEATR6	U5	ENSG00000144857	BOC	M5
ENSG00000105559	PLEKHA4	F2	ENSG00000106636	YKT6	S2	ENSG00000068308	OTUD5	U5	ENSG00000144909	OSBPL11	M5
ENSG00000105568	PPP2R1A	F2	ENSG00000106638	TBL2	S2	ENSG00000068323	TFE3	U5	ENSG00000144959	NCEH1	M5
ENSG00000105576	TNPO2	F2	ENSG00000106682	EIF4H	S2	ENSG00000068354	TBC1D25	U5	ENSG00000145220	LYAR	M5
ENSG00000105605	CACNG7	F2	ENSG00000106688	SLC1A1	S2	ENSG00000068394	GPKOW	U5	ENSG00000145242	EPHA5	M5
ENSG00000105607	GCDH	F2	ENSG00000106692	FKTN	S2	ENSG00000068438	FTSJ1	U5	ENSG00000145348	TBCK	M5
ENSG00000105612	DNASE2	F2	ENSG00000106701	FSD1L	S2	ENSG00000068831	RASGRP2	U5	ENSG00000145375	SPATA5	M5
ENSG00000105613	MAST1	F2	ENSG00000106723	SPIN1	S2	ENSG00000068878	PSME4	U5	ENSG00000145495	MARCHF6	M5
ENSG00000105617	LENG1	F2	ENSG00000106771	TMEM245	S2	ENSG00000069943	PIGB	U5	ENSG00000145681	HAPLN1	M5
ENSG00000105618	PRPF31	F2	ENSG00000106772	PRUNE2	S2	ENSG00000069966	GNB5	U5	ENSG00000145725	PPIP5K2	M5
ENSG00000105619	TFPT	F2	ENSG00000106780	MEGF9	S2	ENSG00000070081	NUCB2	U5	ENSG00000145882	PCYOX1L	M5
ENSG00000105642	KCNN1	F2	ENSG00000106789	CORO2A	S2	ENSG00000070367	EXOC5	U5	ENSG00000146433	TMEM181	M5
ENSG00000105643	ARRDC2	F2	ENSG00000106799	TGFBR1	S2	ENSG00000070413	DGCR2	U5	ENSG00000147576	ADHFE1	M5
ENSG00000105647	PIK3R2	F2	ENSG00000106809	OGN	S2	ENSG00000070476	ZXDC	U5	ENSG00000148143	ZNF462	M5
ENSG00000105649	RAB3A	F2	ENSG00000106819	ASPN	S2	ENSG00000070495	JMJD6	U5	ENSG00000148219	ASTN2	M5
ENSG00000105650	PDE4C	F2	ENSG00000106829	TLE4	S2	ENSG00000070950	RAD18	U5	ENSG00000148291	SURF2	M5
ENSG00000105655	ISYNA1	F2	ENSG00000106852	LHX6	S2	ENSG00000071539	TRIP13	U5	ENSG00000148399	DPH7	M5
ENSG00000105656	ELL	F2	ENSG00000106853	PTGR1	S2	ENSG00000071859	FAM50A	U5	ENSG00000148411	NACC2	M5
ENSG00000105669	COPE	F2	ENSG00000106868	SUSD1	S2	ENSG00000071889	FAM3A	U5	ENSG00000148429	USP6NL	M5
ENSG00000105671	DDX49	F2	ENSG00000106948	AKNA	S2	ENSG00000071894	CPSF1	U5	ENSG00000148737	TCF7L2	M5
ENSG00000105676	ARMC6	F2	ENSG00000106993	CDC37L1	S2	ENSG00000071967	CYBRD1	U5	ENSG00000148798	INA	M5
ENSG00000105677	TMEM147	F2	ENSG00000107020	PLGRKT	S2	ENSG00000072133	RPS6KA6	U5	ENSG00000149089	APIP	M5
ENSG00000105696	TMEM59L	F2	ENSG00000107021	TBC1D13	S2	ENSG00000072135	PTPN18	U5	ENSG00000149262	INTS4	M5
ENSG00000105698	USF2	F2	ENSG00000107036	RIC1	S2	ENSG00000072401	UBE2D1	U5	ENSG00000149292	TTC12	M5
ENSG00000105701	FKBP8	F2	ENSG00000107077	KDM4C	S2	ENSG00000072786	STK10	U5	ENSG00000149547	EI24	M5
ENSG00000105705	SUGP1	F2	ENSG00000107099	DOCK8	S2	ENSG00000072958	AP1M1	U5	ENSG00000149575	SCN2B	M5
ENSG00000105711	SCN1B	F2	ENSG00000107105	ELAVL2	S2	ENSG00000073711	PPP2R3A	U5	ENSG00000149582	TMEM25	M5
ENSG00000105717	PBX4	F2	ENSG00000107130	NCS1	S2	ENSG00000074201	CLNS1A	U5	ENSG00000149657	LSM14B	M5
ENSG00000105722	ERF	F2	ENSG00000107147	KCNT1	S2	ENSG00000074657	ZNF532	U5	ENSG00000150782	IL18	M5
ENSG00000105723	GSK3A	F2	ENSG00000107164	FUBP3	S2	ENSG00000074842	MYDGF	U5	ENSG00000151136	ABTB3	M5
ENSG00000105726	ATP13A1	F2	ENSG00000107185	RGP1	S2	ENSG00000074855	ANO8	U5	ENSG00000151229	SLC2A13	M5
ENSG00000105732	ZNF574	F2	ENSG00000107186	MPDZ	S2	ENSG00000075415	SLC25A3	U5	ENSG00000151320	AKAP6	M5
ENSG00000105755	ETHE1	F2	ENSG00000107201	RIGI	S2	ENSG00000075618	FSCN1	U5	ENSG00000151461	UPF2	M5
ENSG00000105767	CADM4	F2	ENSG00000107262	BAG1	S2	ENSG00000075975	MKRN2	U5	ENSG00000151490	PTPRO	M5
ENSG00000105771	SMG9	F2	ENSG00000107263	RAPGEF1	S2	ENSG00000076242	MLH1	U5	ENSG00000151553	FHIP2A	M5
ENSG00000105778	AVL9	F2	ENSG00000107282	APBA1	S2	ENSG00000076321	KLHL20	U5	ENSG00000151690	MFSD6	M5
ENSG00000105792	CFAP69	F2	ENSG00000107290	SETX	S2	ENSG00000076641	PAG1	U5	ENSG00000151693	ASAP2	M5
ENSG00000105793	GTPBP10	F2	ENSG00000107295	SH3GL2	S2	ENSG00000076826	CAMSAP3	U5	ENSG00000151835	SACS	M5
ENSG00000105810	CDK6	F2	ENSG00000107317	PTGDS	S2	ENSG00000076924	XAB2	U5	ENSG00000151917	BEND6	M5
ENSG00000105819	PMPCB	F2	ENSG00000107341	UBE2R2	S2	ENSG00000077092	RARB	U5	ENSG00000151948	GLT1D1	M5
ENSG00000105821	DNAJC2	F2	ENSG00000107362	ABHD17B	S2	ENSG00000077232	DNAJC10	U5	ENSG00000152465	NMT2	M5
ENSG00000105835	NAMPT	F2	ENSG00000107372	ZFAND5	S2	ENSG00000077420	APBB1IP	U5	ENSG00000152518	ZFP36L2	M5
ENSG00000105852	PON3	F2	ENSG00000107438	PDLIM1	S2	ENSG00000077463	SIRT6	U5	ENSG00000152779	SLC16A12	M5
ENSG00000105854	PON2	F2	ENSG00000107518	ATRNL1	S2	ENSG00000077721	UBE2A	U5	ENSG00000152782	PANK1	M5
ENSG00000105855	ITGB8	F2	ENSG00000107537	PHYH	S2	ENSG00000077942	FBLN1	U5	ENSG00000152932	RAB3C	M5
ENSG00000105856	HBP1	F2	ENSG00000107554	DNMBP	S2	ENSG00000078269	SYNJ2	U5	ENSG00000153094	BCL2L11	M5
ENSG00000105866	SP4	F2	ENSG00000107560	RAB11FIP2	S2	ENSG00000078795	PKD2L2	U5	ENSG00000153107	ANAPC1	M5
ENSG00000105880	DLX5	F2	ENSG00000107562	CXCL12	S2	ENSG00000078814	MYH7B	U5	ENSG00000154096	THY1	M5
ENSG00000105887	MTPN	F2	ENSG00000107566	ERLIN1	S2	ENSG00000079150	FKBP7	U5	ENSG00000154240	CEP112	M5
ENSG00000105928	GSDME	F2	ENSG00000107581	EIF3A	S2	ENSG00000079257	LXN	U5	ENSG00000154274	C4orf19	M5
ENSG00000105948	TTC26	F2	ENSG00000107611	CUBN	S2	ENSG00000079313	REXO1	U5	ENSG00000154734	ADAMTS1	M5
ENSG00000105953	OGDH	F2	ENSG00000107625	DDX50	S2	ENSG00000079739	PGM1	U5	ENSG00000154822	PLCL2	M5
ENSG00000105963	ADAP1	F2	ENSG00000107643	MAPK8	S2	ENSG00000080573	COL5A3	U5	ENSG00000155097	ATP6V1C1	M5
ENSG00000105968	H2AZ2	F2	ENSG00000107651	SEC23IP	S2	ENSG00000080608	PUM3	U5	ENSG00000155158	TTC39B	M5
ENSG00000105971	CAV2	F2	ENSG00000107669	ATE1	S2	ENSG00000080802	CNOT4	U5	ENSG00000155744	HYCC2	M5
ENSG00000105974	CAV1	F2	ENSG00000107672	NSMCE4A	S2	ENSG00000081059	TCF7	U5	ENSG00000155970	MICU3	M5
ENSG00000105976	MET	F2	ENSG00000107719	PALD1	S2	ENSG00000081181	ARG2	U5	ENSG00000156136	DCK	M5
ENSG00000105982	RNF32	F2	ENSG00000107736	CDH23	S2	ENSG00000081985	IL12RB2	U5	ENSG00000156475	PPP2R2B	M5
ENSG00000105989	WNT2	F2	ENSG00000107738	VSIR	S2	ENSG00000082146	STRADB	U5	ENSG00000156515	HK1	M5
ENSG00000106009	BRAT1	F2	ENSG00000107742	SPOCK2	S2	ENSG00000082213	C5orf22	U5	ENSG00000156599	ZDHHC5	M5
ENSG00000106025	TSPAN12	F2	ENSG00000107758	PPP3CB	S2	ENSG00000082512	TRAF5	U5	ENSG00000156642	NPTN	M5
ENSG00000106028	SSBP1	F2	ENSG00000107771	CCSER2	S2	ENSG00000082805	ERC1	U5	ENSG00000156687	UNC5D	M5
ENSG00000106034	CPED1	F2	ENSG00000107779	BMPR1A	S2	ENSG00000083093	PALB2	U5	ENSG00000156787	TBC1D31	M5
ENSG00000106049	HIBADH	F2	ENSG00000107789	MINPP1	S2	ENSG00000084693	AGBL5	U5	ENSG00000156858	PRR14	M5
ENSG00000106070	GRB10	F2	ENSG00000107798	LIPA	S2	ENSG00000085274	MYNN	U5	ENSG00000156869	FRRS1	M5
ENSG00000106077	ABHD11	F2	ENSG00000107815	TWNK	S2	ENSG00000085377	PREP	U5	ENSG00000156973	PDE6D	M5
ENSG00000106078	COBL	F2	ENSG00000107819	SFXN3	S2	ENSG00000085415	SEH1L	U5	ENSG00000157184	CPT2	M5
ENSG00000106080	FKBP14	F2	ENSG00000107821	KAZALD1	S2	ENSG00000085491	SLC25A24	U5	ENSG00000158186	MRAS	M5
ENSG00000106086	PLEKHA8	F2	ENSG00000107854	TNKS2	S2	ENSG00000085998	POMGNT1	U5	ENSG00000158292	GPR153	M5
ENSG00000106089	STX1A	F2	ENSG00000107862	GBF1	S2	ENSG00000085999	RAD54L	U5	ENSG00000158417	EIF5B	M5
ENSG00000106105	GARS1	F2	ENSG00000107863	ARHGAP21	S2	ENSG00000086504	MRPL28	U5	ENSG00000158528	PPP1R9A	M5
ENSG00000106113	CRHR2	F2	ENSG00000107864	CPEB3	S2	ENSG00000086589	RBM22	U5	ENSG00000158560	DYNC1I1	M5
ENSG00000106125	MINDY4	F2	ENSG00000107872	FBXL15	S2	ENSG00000086619	ERO1B	U5	ENSG00000158636	EMSY	M5
ENSG00000106144	CASP2	F2	ENSG00000107882	SUFU	S2	ENSG00000086848	ALG9	U5	ENSG00000159082	SYNJ1	M5
ENSG00000106153	CHCHD2	F2	ENSG00000107897	ACBD5	S2	ENSG00000087111	PIGS	U5	ENSG00000159164	SV2A	M5
ENSG00000106211	HSPB1	F2	ENSG00000107929	LARP4B	S2	ENSG00000087206	UIMC1	U5	ENSG00000159579	RSPRY1	M5
ENSG00000106236	NPTX2	F2	ENSG00000107937	GTPBP4	S2	ENSG00000087303	NID2	U5	ENSG00000159720	ATP6V0D1	M5
ENSG00000106244	PDAP1	F2	ENSG00000107938	EDRF1	S2	ENSG00000088179	PTPN4	U5	ENSG00000159792	PSKH1	M5
ENSG00000106245	BUD31	F2	ENSG00000107951	MTPAP	S2	ENSG00000088205	DDX18	U5	ENSG00000160075	SSU72	M5
ENSG00000106246	PTCD1	F2	ENSG00000107954	NEURL1	S2	ENSG00000088826	SMOX	U5	ENSG00000160221	GATD3	M5
ENSG00000106261	ZKSCAN1	F2	ENSG00000107957	SH3PXD2A	S2	ENSG00000089022	MAPKAPK5	U5	ENSG00000160326	SLC2A6	M5
ENSG00000106263	EIF3B	F2	ENSG00000107959	PITRM1	S2	ENSG00000089234	BRAP	U5	ENSG00000160570	DEDD2	M5
ENSG00000106278	PTPRZ1	F2	ENSG00000107960	STN1	S2	ENSG00000089775	ZBTB25	U5	ENSG00000160785	SLC25A44	M5
ENSG00000106290	TAF6	F2	ENSG00000107968	MAP3K8	S2	ENSG00000089820	ARHGAP4	U5	ENSG00000160789	LMNA	M5
ENSG00000106327	TFR2	F2	ENSG00000108018	SORCS1	S2	ENSG00000089876	DHX32	U5	ENSG00000160932	LY6E	M5
ENSG00000106330	MOSPD3	F2	ENSG00000108021	TASOR2	S2	ENSG00000090006	LTBP4	U5	ENSG00000160957	RECQL4	M5
ENSG00000106333	PCOLCE	F2	ENSG00000108055	SMC3	S2	ENSG00000090097	PCBP4	U5	ENSG00000161203	AP2M1	M5
ENSG00000106344	RBM28	F2	ENSG00000108061	SHOC2	S2	ENSG00000090447	TFAP4	U5	ENSG00000161328	LRRC56	M5
ENSG00000106346	USP42	F2	ENSG00000108064	TFAM	S2	ENSG00000090487	SPG21	U5	ENSG00000161714	PLCD3	M5
ENSG00000106348	IMPDH1	F2	ENSG00000108091	CCDC6	S2	ENSG00000090565	RAB11FIP3	U5	ENSG00000162426	SLC45A1	M5
ENSG00000106355	LSM5	F2	ENSG00000108094	CUL2	S2	ENSG00000091542	ALKBH5	U5	ENSG00000162520	SYNC	M5
ENSG00000106366	SERPINE1	F2	ENSG00000108100	CCNY	S2	ENSG00000091640	SPAG7	U5	ENSG00000162613	FUBP1	M5
ENSG00000106367	AP1S1	F2	ENSG00000108175	ZMIZ1	S2	ENSG00000091651	ORC6	U5	ENSG00000162630	B3GALT2	M5
ENSG00000106392	C1GALT1	F2	ENSG00000108176	DNAJC12	S2	ENSG00000092010	PSME1	U5	ENSG00000162636	FAM102B	M5
ENSG00000106397	PLOD3	F2	ENSG00000108231	LGI1	S2	ENSG00000092054	MYH7	U5	ENSG00000162642	C1orf52	M5
ENSG00000106400	ZNHIT1	F2	ENSG00000108239	TBC1D12	S2	ENSG00000092108	SCFD1	U5	ENSG00000162687	KCNT2	M5
ENSG00000106460	TMEM106B	F2	ENSG00000108256	NUFIP2	S2	ENSG00000092470	WDR76	U5	ENSG00000163001	CFAP36	M5
ENSG00000106462	EZH2	F2	ENSG00000108262	GIT1	S2	ENSG00000093144	ECHDC1	U5	ENSG00000163082	SGPP2	M5
ENSG00000106484	MEST	F2	ENSG00000108306	FBXL20	S2	ENSG00000094914	AAAS	U5	ENSG00000163125	RPRD2	M5
ENSG00000106524	ANKMY2	F2	ENSG00000108349	CASC3	S2	ENSG00000095209	TMEM38B	U5	ENSG00000163138	PACRGL	M5
ENSG00000106536	POU6F2	F2	ENSG00000108370	RGS9	S2	ENSG00000095303	PTGS1	U5	ENSG00000163170	BOLA3	M5
ENSG00000106537	TSPAN13	F2	ENSG00000108375	RNF43	S2	ENSG00000095321	CRAT	U5	ENSG00000163328	GPR155	M5
ENSG00000106538	RARRES2	F2	ENSG00000108384	RAD51C	S2	ENSG00000095370	SH2D3C	U5	ENSG00000163590	PPM1L	M5
ENSG00000106554	CHCHD3	F2	ENSG00000108389	MTMR4	S2	ENSG00000095383	TBC1D2	U5	ENSG00000163629	PTPN13	M5
ENSG00000106565	TMEM176B	F2	ENSG00000108395	TRIM37	S2	ENSG00000095574	IKZF5	U5	ENSG00000163704	PRRT3	M5
ENSG00000106571	GLI3	F2	ENSG00000108406	DHX40	S2	ENSG00000095970	TREM2	U5	ENSG00000163788	SNRK	M5
ENSG00000106591	MRPL32	F2	ENSG00000108424	KPNB1	S2	ENSG00000096070	BRPF3	U5	ENSG00000163884	KLF15	M5
ENSG00000106605	BLVRA	F2	ENSG00000108433	GOSR2	S2	ENSG00000096080	MRPS18A	U5	ENSG00000164024	METAP1	M5
ENSG00000106608	URGCP	F2	ENSG00000108439	PNPO	S2	ENSG00000099246	RAB18	U5	ENSG00000164038	SLC9B2	M5
ENSG00000106617	PRKAG2	F2	ENSG00000108443	RPS6KB1	S2	ENSG00000099810	MTAP	U5	ENSG00000164091	WDR82	M5
ENSG00000106624	AEBP1	F2	ENSG00000108465	CDK5RAP3	S2	ENSG00000099899	TRMT2A	U5	ENSG00000164122	ASB5	M5
ENSG00000106628	POLD2	F2	ENSG00000108479	GALK1	S2	ENSG00000099940	SNAP29	U5	ENSG00000164187	LMBRD2	M5
ENSG00000106633	GCK	F2	ENSG00000108506	INTS2	S2	ENSG00000099949	LZTR1	U5	ENSG00000164332	UBLCP1	M5
ENSG00000106635	BCL7B	F2	ENSG00000108510	MED13	S2	ENSG00000099957	P2RX6	U5	ENSG00000164548	TRA2A	M5
ENSG00000106636	YKT6	F2	ENSG00000108528	SLC25A11	S2	ENSG00000099992	TBC1D10A	U5	ENSG00000164776	PHKG1	M5
ENSG00000106638	TBL2	F2	ENSG00000108557	RAI1	S2	ENSG00000099994	SUSD2	U5	ENSG00000164924	YWHAZ	M5
ENSG00000106665	CLIP2	F2	ENSG00000108559	NUP88	S2	ENSG00000100036	SLC35E4	U5	ENSG00000164946	FREM1	M5
ENSG00000106682	EIF4H	F2	ENSG00000108561	C1QBP	S2	ENSG00000100060	MFNG	U5	ENSG00000165023	DIRAS2	M5
ENSG00000106683	LIMK1	F2	ENSG00000108578	BLMH	S2	ENSG00000100065	CARD10	U5	ENSG00000165113	GKAP1	M5
ENSG00000106692	FKTN	F2	ENSG00000108582	CPD	S2	ENSG00000100092	SH3BP1	U5	ENSG00000165152	PGAP4	M5
ENSG00000106701	FSD1L	F2	ENSG00000108587	GOSR1	S2	ENSG00000100104	SRRD	U5	ENSG00000165392	WRN	M5
ENSG00000106733	NMRK1	F2	ENSG00000108588	CCDC47	S2	ENSG00000100150	DEPDC5	U5	ENSG00000165494	PCF11	M5
ENSG00000106771	TMEM245	F2	ENSG00000108599	AKAP10	S2	ENSG00000100196	KDELR3	U5	ENSG00000165716	DIPK1B	M5
ENSG00000106780	MEGF9	F2	ENSG00000108651	UTP6	S2	ENSG00000100221	JOSD1	U5	ENSG00000165731	RET	M5
ENSG00000106789	CORO2A	F2	ENSG00000108654	DDX5	S2	ENSG00000100227	POLDIP3	U5	ENSG00000165886	UBTD1	M5
ENSG00000106799	TGFBR1	F2	ENSG00000108666	C17orf75	S2	ENSG00000100243	CYB5R3	U5	ENSG00000165895	ARHGAP42	M5
ENSG00000106803	SEC61B	F2	ENSG00000108671	PSMD11	S2	ENSG00000100284	TOM1	U5	ENSG00000165973	NELL1	M5
ENSG00000106809	OGN	F2	ENSG00000108733	PEX12	S2	ENSG00000100292	HMOX1	U5	ENSG00000166111	SVOP	M5
ENSG00000106819	ASPN	F2	ENSG00000108798	ABI3	S2	ENSG00000100299	ARSA	U5	ENSG00000166167	BTRC	M5
ENSG00000106823	ECM2	F2	ENSG00000108799	EZH1	S2	ENSG00000100311	PDGFB	U5	ENSG00000166170	BAG5	M5
ENSG00000106852	LHX6	F2	ENSG00000108819	PPP1R9B	S2	ENSG00000100359	SGSM3	U5	ENSG00000166189	HPS6	M5
ENSG00000106853	PTGR1	F2	ENSG00000108828	VAT1	S2	ENSG00000100399	CHADL	U5	ENSG00000166224	SGPL1	M5
ENSG00000106868	SUSD1	F2	ENSG00000108839	ALOX12	S2	ENSG00000100416	TRMU	U5	ENSG00000166432	ZMAT1	M5
ENSG00000106948	AKNA	F2	ENSG00000108848	LUC7L3	S2	ENSG00000100425	BRD1	U5	ENSG00000166435	XRRA1	M5
ENSG00000106976	DNM1	F2	ENSG00000108852	MPP2	S2	ENSG00000100426	ZBED4	U5	ENSG00000166436	TRIM66	M5
ENSG00000106991	ENG	F2	ENSG00000108854	SMURF2	S2	ENSG00000100441	KHNYN	U5	ENSG00000166444	DENND2B	M5
ENSG00000106992	AK1	F2	ENSG00000108924	HLF	S2	ENSG00000100485	SOS2	U5	ENSG00000166454	ATMIN	M5
ENSG00000107020	PLGRKT	F2	ENSG00000108946	PRKAR1A	S2	ENSG00000100528	CNIH1	U5	ENSG00000166455	C16orf46	M5
ENSG00000107021	TBC1D13	F2	ENSG00000108947	EFNB3	S2	ENSG00000100580	TMED8	U5	ENSG00000166716	ZNF592	M5
ENSG00000107036	RIC1	F2	ENSG00000108950	FAM20A	S2	ENSG00000100596	SPTLC2	U5	ENSG00000166889	PATL1	M5
ENSG00000107077	KDM4C	F2	ENSG00000108953	YWHAE	S2	ENSG00000100599	RIN3	U5	ENSG00000166900	STX3	M5
ENSG00000107104	KANK1	F2	ENSG00000108960	MMD	S2	ENSG00000100600	LGMN	U5	ENSG00000166902	MRPL16	M5
ENSG00000107175	CREB3	F2	ENSG00000108984	MAP2K6	S2	ENSG00000100601	ALKBH1	U5	ENSG00000166913	YWHAB	M5
ENSG00000107185	RGP1	F2	ENSG00000109016	DHRS7B	S2	ENSG00000100629	CEP128	U5	ENSG00000166974	MAPRE2	M5
ENSG00000107186	MPDZ	F2	ENSG00000109046	WSB1	S2	ENSG00000100711	ZFYVE21	U5	ENSG00000167107	ACSF2	M5
ENSG00000107201	RIGI	F2	ENSG00000109079	TNFAIP1	S2	ENSG00000100889	PCK2	U5	ENSG00000167114	SLC27A4	M5
ENSG00000107223	EDF1	F2	ENSG00000109111	SUPT6H	S2	ENSG00000100890	PRORP	U5	ENSG00000167136	ENDOG	M5
ENSG00000107249	GLIS3	F2	ENSG00000109133	TMEM33	S2	ENSG00000100897	DCAF11	U5	ENSG00000167461	RAB8A	M5
ENSG00000107262	BAG1	F2	ENSG00000109158	GABRA4	S2	ENSG00000100908	EMC9	U5	ENSG00000167615	LENG8	M5
ENSG00000107281	NPDC1	F2	ENSG00000109171	SLAIN2	S2	ENSG00000100979	PLTP	U5	ENSG00000167770	OTUB1	M5
ENSG00000107317	PTGDS	F2	ENSG00000109180	OCIAD1	S2	ENSG00000100991	TRPC4AP	U5	ENSG00000167994	RAB3IL1	M5
ENSG00000107338	SHB	F2	ENSG00000109184	DCUN1D4	S2	ENSG00000101004	NINL	U5	ENSG00000168310	IRF2	M5
ENSG00000107341	UBE2R2	F2	ENSG00000109189	USP46	S2	ENSG00000101019	UQCC1	U5	ENSG00000168389	MFSD2A	M5
ENSG00000107371	EXOSC3	F2	ENSG00000109220	CHIC2	S2	ENSG00000101084	RAB5IF	U5	ENSG00000168434	COG7	M5
ENSG00000107404	DVL1	F2	ENSG00000109265	CRACD	S2	ENSG00000101134	DOK5	U5	ENSG00000168679	SLC16A4	M5
ENSG00000107443	CCNJ	F2	ENSG00000109270	LAMTOR3	S2	ENSG00000101193	GID8	U5	ENSG00000168769	TET2	M5
ENSG00000107518	ATRNL1	F2	ENSG00000109320	NFKB1	S2	ENSG00000101310	SEC23B	U5	ENSG00000168916	ZNF608	M5
ENSG00000107537	PHYH	F2	ENSG00000109332	UBE2D3	S2	ENSG00000101361	NOP56	U5	ENSG00000168993	CPLX1	M5
ENSG00000107560	RAB11FIP2	F2	ENSG00000109339	MAPK10	S2	ENSG00000101407	TTI1	U5	ENSG00000169018	FEM1B	M5
ENSG00000107581	EIF3A	F2	ENSG00000109381	ELF2	S2	ENSG00000101438	SLC32A1	U5	ENSG00000169032	MAP2K1	M5
ENSG00000107611	CUBN	F2	ENSG00000109436	TBC1D9	S2	ENSG00000101464	PIGU	U5	ENSG00000169062	UPF3A	M5
ENSG00000107614	TRDMT1	F2	ENSG00000109445	ZNF330	S2	ENSG00000101493	ZNF516	U5	ENSG00000169139	UBE2V2	M5
ENSG00000107625	DDX50	F2	ENSG00000109452	INPP4B	S2	ENSG00000101542	CDH20	U5	ENSG00000169592	INO80E	M5
ENSG00000107651	SEC23IP	F2	ENSG00000109466	KLHL2	S2	ENSG00000101751	POLI	U5	ENSG00000169621	APLF	M5
ENSG00000107719	PALD1	F2	ENSG00000109472	CPE	S2	ENSG00000102053	ZC3H12B	U5	ENSG00000169764	UGP2	M5
ENSG00000107742	SPOCK2	F2	ENSG00000109475	RPL34	S2	ENSG00000102119	EMD	U5	ENSG00000169891	REPS2	M5
ENSG00000107771	CCSER2	F2	ENSG00000109501	WFS1	S2	ENSG00000102226	USP11	U5	ENSG00000169933	FRMPD4	M5
ENSG00000107779	BMPR1A	F2	ENSG00000109519	GRPEL1	S2	ENSG00000102230	PCYT1B	U5	ENSG00000170043	TRAPPC1	M5
ENSG00000107789	MINPP1	F2	ENSG00000109534	GAR1	S2	ENSG00000102316	MAGED2	U5	ENSG00000170419	VSTM2A	M5
ENSG00000107796	ACTA2	F2	ENSG00000109572	CLCN3	S2	ENSG00000102390	PBDC1	U5	ENSG00000170445	HARS1	M5
ENSG00000107816	LZTS2	F2	ENSG00000109586	GALNT7	S2	ENSG00000102452	NALCN	U5	ENSG00000170743	SYT9	M5
ENSG00000107819	SFXN3	F2	ENSG00000109606	DHX15	S2	ENSG00000102471	NDFIP2	U5	ENSG00000170836	PPM1D	M5
ENSG00000107821	KAZALD1	F2	ENSG00000109610	SOD3	S2	ENSG00000102554	KLF5	U5	ENSG00000170837	GPR27	M5
ENSG00000107829	FBXW4	F2	ENSG00000109618	SEPSECS	S2	ENSG00000102572	STK24	U5	ENSG00000170917	NUDT6	M5
ENSG00000107833	NPM3	F2	ENSG00000109654	TRIM2	S2	ENSG00000102753	KPNA3	U5	ENSG00000171105	INSR	M5
ENSG00000107854	TNKS2	F2	ENSG00000109667	SLC2A9	S2	ENSG00000102781	KATNAL1	U5	ENSG00000171161	ZNF672	M5
ENSG00000107862	GBF1	F2	ENSG00000109670	FBXW7	S2	ENSG00000102878	HSF4	U5	ENSG00000171163	ZNF692	M5
ENSG00000107863	ARHGAP21	F2	ENSG00000109680	TBC1D19	S2	ENSG00000102898	NUTF2	U5	ENSG00000171310	CHST11	M5
ENSG00000107864	CPEB3	F2	ENSG00000109685	NSD2	S2	ENSG00000102900	NUP93	U5	ENSG00000171467	ZNF318	M5
ENSG00000107872	FBXL15	F2	ENSG00000109686	SH3D19	S2	ENSG00000102974	CTCF	U5	ENSG00000171634	BPTF	M5
ENSG00000107874	CUEDC2	F2	ENSG00000109689	STIM2	S2	ENSG00000102984	ZNF821	U5	ENSG00000171867	PRNP	M5
ENSG00000107882	SUFU	F2	ENSG00000109738	GLRB	S2	ENSG00000103018	CYB5B	U5	ENSG00000172159	FRMD3	M5
ENSG00000107897	ACBD5	F2	ENSG00000109756	RAPGEF2	S2	ENSG00000103042	SLC38A7	U5	ENSG00000172270	BSG	M5
ENSG00000107902	LHPP	F2	ENSG00000109762	SNX25	S2	ENSG00000103091	WDR59	U5	ENSG00000172292	CERS6	M5
ENSG00000107929	LARP4B	F2	ENSG00000109775	UFSP2	S2	ENSG00000103152	MPG	U5	ENSG00000172318	B3GALT1	M5
ENSG00000107937	GTPBP4	F2	ENSG00000109787	KLF3	S2	ENSG00000103168	TAF1C	U5	ENSG00000172348	RCAN2	M5
ENSG00000107959	PITRM1	F2	ENSG00000109790	KLHL5	S2	ENSG00000103194	USP10	U5	ENSG00000172456	FGGY	M5
ENSG00000107960	STN1	F2	ENSG00000109794	FAM149A	S2	ENSG00000103202	NME4	U5	ENSG00000172465	TCEAL1	M5
ENSG00000107968	MAP3K8	F2	ENSG00000109814	UGDH	S2	ENSG00000103274	NUBP1	U5	ENSG00000172493	AFF1	M5
ENSG00000108010	GLRX3	F2	ENSG00000109819	PPARGC1A	S2	ENSG00000103342	GSPT1	U5	ENSG00000172530	BANP	M5
ENSG00000108021	TASOR2	F2	ENSG00000109832	DDX25	S2	ENSG00000103351	CLUAP1	U5	ENSG00000172757	CFL1	M5
ENSG00000108039	XPNPEP1	F2	ENSG00000109854	HTATIP2	S2	ENSG00000103356	EARS2	U5	ENSG00000172794	RAB37	M5
ENSG00000108055	SMC3	F2	ENSG00000109861	CTSC	S2	ENSG00000103415	HMOX2	U5	ENSG00000172922	RNASEH2C	M5
ENSG00000108061	SHOC2	F2	ENSG00000109881	CCDC34	S2	ENSG00000103549	RNF40	U5	ENSG00000172939	OXSR1	M5
ENSG00000108094	CUL2	F2	ENSG00000109906	ZBTB16	S2	ENSG00000103710	RASL12	U5	ENSG00000173114	LRRN3	M5
ENSG00000108100	CCNY	F2	ENSG00000109911	ELP4	S2	ENSG00000103769	RAB11A	U5	ENSG00000173120	KDM2A	M5
ENSG00000108107	RPL28	F2	ENSG00000109919	MTCH2	S2	ENSG00000103876	FAH	U5	ENSG00000173157	ADAMTS20	M5
ENSG00000108175	ZMIZ1	F2	ENSG00000109920	FNBP4	S2	ENSG00000103932	RPAP1	U5	ENSG00000173258	ZNF483	M5
ENSG00000108176	DNAJC12	F2	ENSG00000109929	SC5D	S2	ENSG00000104140	RHOV	U5	ENSG00000173465	ZNRD2	M5
ENSG00000108179	PPIF	F2	ENSG00000109956	B3GAT1	S2	ENSG00000104142	VPS18	U5	ENSG00000173511	VEGFB	M5
ENSG00000108239	TBC1D12	F2	ENSG00000110042	DTX4	S2	ENSG00000104221	BRF2	U5	ENSG00000173653	RCE1	M5
ENSG00000108256	NUFIP2	F2	ENSG00000110047	EHD1	S2	ENSG00000104343	UBE2W	U5	ENSG00000173692	PSMD1	M5
ENSG00000108298	RPL19	F2	ENSG00000110048	OSBP	S2	ENSG00000104365	IKBKB	U5	ENSG00000173744	AGFG1	M5
ENSG00000108306	FBXL20	F2	ENSG00000110066	KMT5B	S2	ENSG00000104613	INTS10	U5	ENSG00000173801	JUP	M5
ENSG00000108312	UBTF	F2	ENSG00000110074	FOXRED1	S2	ENSG00000104660	LEPROTL1	U5	ENSG00000173821	RNF213	M5
ENSG00000108344	PSMD3	F2	ENSG00000110075	PPP6R3	S2	ENSG00000104738	MCM4	U5	ENSG00000173846	PLK3	M5
ENSG00000108349	CASC3	F2	ENSG00000110080	ST3GAL4	S2	ENSG00000104774	MAN2B1	U5	ENSG00000173889	PHC3	M5
ENSG00000108352	RAPGEFL1	F2	ENSG00000110090	CPT1A	S2	ENSG00000104805	NUCB1	U5	ENSG00000174106	LEMD3	M5
ENSG00000108375	RNF43	F2	ENSG00000110092	CCND1	S2	ENSG00000104812	GYS1	U5	ENSG00000174326	SLC16A11	M5
ENSG00000108384	RAD51C	F2	ENSG00000110104	CCDC86	S2	ENSG00000104825	NFKBIB	U5	ENSG00000174740	PABPC5	M5
ENSG00000108395	TRIM37	F2	ENSG00000110107	PRPF19	S2	ENSG00000104833	TUBB4A	U5	ENSG00000175073	VCPIP1	M5
ENSG00000108423	TUBD1	F2	ENSG00000110172	CHORDC1	S2	ENSG00000104856	RELB	U5	ENSG00000175166	PSMD2	M5
ENSG00000108439	PNPO	F2	ENSG00000110218	PANX1	S2	ENSG00000104859	CLASRP	U5	ENSG00000175203	DCTN2	M5
ENSG00000108443	RPS6KB1	F2	ENSG00000110237	ARHGEF17	S2	ENSG00000104863	LIN7B	U5	ENSG00000175416	CLTB	M5
ENSG00000108465	CDK5RAP3	F2	ENSG00000110315	RNF141	S2	ENSG00000104872	PIH1D1	U5	ENSG00000175592	FOSL1	M5
ENSG00000108468	CBX1	F2	ENSG00000110318	CEP126	S2	ENSG00000104976	SNAPC2	U5	ENSG00000175606	TMEM70	M5
ENSG00000108474	PIGL	F2	ENSG00000110321	EIF4G2	S2	ENSG00000105122	RASAL3	U5	ENSG00000175634	RPS6KB2	M5
ENSG00000108479	GALK1	F2	ENSG00000110328	GALNT18	S2	ENSG00000105197	TIMM50	U5	ENSG00000175697	GPR156	M5
ENSG00000108506	INTS2	F2	ENSG00000110330	BIRC2	S2	ENSG00000105229	PIAS4	U5	ENSG00000175893	ZDHHC21	M5
ENSG00000108510	MED13	F2	ENSG00000110344	UBE4A	S2	ENSG00000105255	FSD1	U5	ENSG00000175895	PLEKHF2	M5
ENSG00000108518	PFN1	F2	ENSG00000110367	DDX6	S2	ENSG00000105258	POLR2I	U5	ENSG00000176444	CLK2	M5
ENSG00000108523	RNF167	F2	ENSG00000110395	CBL	S2	ENSG00000105298	CACTIN	U5	ENSG00000176454	LPCAT4	M5
ENSG00000108528	SLC25A11	F2	ENSG00000110400	NECTIN1	S2	ENSG00000105339	DENND3	U5	ENSG00000177034	MTX3	M5
ENSG00000108557	RAI1	F2	ENSG00000110422	HIPK3	S2	ENSG00000105364	MRPL4	U5	ENSG00000177181	RIMKLA	M5
ENSG00000108559	NUP88	F2	ENSG00000110427	KIAA1549L	S2	ENSG00000105379	ETFB	U5	ENSG00000177225	GATD1	M5
ENSG00000108561	C1QBP	F2	ENSG00000110429	FBXO3	S2	ENSG00000105393	BABAM1	U5	ENSG00000177511	ST8SIA3	M5
ENSG00000108578	BLMH	F2	ENSG00000110435	PDHX	S2	ENSG00000105404	RABAC1	U5	ENSG00000177565	TBL1XR1	M5
ENSG00000108590	MED31	F2	ENSG00000110436	SLC1A2	S2	ENSG00000105419	MEIS3	U5	ENSG00000177570	SAMD12	M5
ENSG00000108591	DRG2	F2	ENSG00000110514	MADD	S2	ENSG00000105447	GRWD1	U5	ENSG00000178662	CSRNP3	M5
ENSG00000108651	UTP6	F2	ENSG00000110660	SLC35F2	S2	ENSG00000105464	GRIN2D	U5	ENSG00000178685	PARP10	M5
ENSG00000108654	DDX5	F2	ENSG00000110675	ELMOD1	S2	ENSG00000105619	TFPT	U5	ENSG00000179044	EXOC3L1	M5
ENSG00000108679	LGALS3BP	F2	ENSG00000110693	SOX6	S2	ENSG00000105640	RPL18A	U5	ENSG00000179085	DPM3	M5
ENSG00000108733	PEX12	F2	ENSG00000110696	C11orf58	S2	ENSG00000105649	RAB3A	U5	ENSG00000179097	HTR1F	M5
ENSG00000108773	KAT2A	F2	ENSG00000110700	RPS13	S2	ENSG00000105656	ELL	U5	ENSG00000179115	FARSA	M5
ENSG00000108774	RAB5C	F2	ENSG00000110721	CHKA	S2	ENSG00000105671	DDX49	U5	ENSG00000179604	CDC42EP4	M5
ENSG00000108788	MLX	F2	ENSG00000110768	GTF2H1	S2	ENSG00000105699	LSR	U5	ENSG00000179918	SEPHS2	M5
ENSG00000108799	EZH1	F2	ENSG00000110799	VWF	S2	ENSG00000105717	PBX4	U5	ENSG00000180530	NRIP1	M5
ENSG00000108821	COL1A1	F2	ENSG00000110801	PSMD9	S2	ENSG00000105851	PIK3CG	U5	ENSG00000180592	SKIDA1	M5
ENSG00000108826	MRPL27	F2	ENSG00000110841	PPFIBP1	S2	ENSG00000105928	GSDME	U5	ENSG00000180901	KCTD2	M5
ENSG00000108828	VAT1	F2	ENSG00000110851	PRDM4	S2	ENSG00000105983	LMBR1	U5	ENSG00000181104	F2R	M5
ENSG00000108829	LRRC59	F2	ENSG00000110871	COQ5	S2	ENSG00000106018	VIPR2	U5	ENSG00000181449	SOX2	M5
ENSG00000108830	RND2	F2	ENSG00000110880	CORO1C	S2	ENSG00000106125	MINDY4	U5	ENSG00000181754	AMIGO1	M5
ENSG00000108839	ALOX12	F2	ENSG00000110888	CAPRIN2	S2	ENSG00000106144	CASP2	U5	ENSG00000182013	PNMA8A	M5
ENSG00000108840	HDAC5	F2	ENSG00000110906	KCTD10	S2	ENSG00000106246	PTCD1	U5	ENSG00000182400	TRAPPC6B	M5
ENSG00000108846	ABCC3	F2	ENSG00000110911	SLC11A2	S2	ENSG00000106327	TFR2	U5	ENSG00000182768	NGRN	M5
ENSG00000108852	MPP2	F2	ENSG00000110917	MLEC	S2	ENSG00000106399	RPA3	U5	ENSG00000182871	COL18A1	M5
ENSG00000108854	SMURF2	F2	ENSG00000110921	MVK	S2	ENSG00000106460	TMEM106B	U5	ENSG00000182872	RBM10	M5
ENSG00000108883	EFTUD2	F2	ENSG00000110955	ATP5F1B	S2	ENSG00000106571	GLI3	U5	ENSG00000183258	DDX41	M5
ENSG00000108950	FAM20A	F2	ENSG00000110958	PTGES3	S2	ENSG00000106591	MRPL32	U5	ENSG00000183354	KIAA2026	M5
ENSG00000108953	YWHAE	F2	ENSG00000110975	SYT10	S2	ENSG00000106615	RHEB	U5	ENSG00000183696	UPP1	M5
ENSG00000108960	MMD	F2	ENSG00000110987	BCL7A	S2	ENSG00000106636	YKT6	U5	ENSG00000183735	TBK1	M5
ENSG00000108963	DPH1	F2	ENSG00000111011	RSRC2	S2	ENSG00000106665	CLIP2	U5	ENSG00000184408	KCND2	M5
ENSG00000109046	WSB1	F2	ENSG00000111052	LIN7A	S2	ENSG00000106819	ASPN	U5	ENSG00000184634	MED12	M5
ENSG00000109063	MYH3	F2	ENSG00000111087	GLI1	S2	ENSG00000107404	DVL1	U5	ENSG00000184992	BRI3BP	M5
ENSG00000109066	TMEM104	F2	ENSG00000111110	PPM1H	S2	ENSG00000107551	RASSF4	U5	ENSG00000185019	UBOX5	M5
ENSG00000109072	VTN	F2	ENSG00000111142	METAP2	S2	ENSG00000107566	ERLIN1	U5	ENSG00000185507	IRF7	M5
ENSG00000109083	IFT20	F2	ENSG00000111186	WNT5B	S2	ENSG00000107611	CUBN	U5	ENSG00000185736	ADARB2	M5
ENSG00000109084	TMEM97	F2	ENSG00000111218	PRMT8	S2	ENSG00000107651	SEC23IP	U5	ENSG00000186153	WWOX	M5
ENSG00000109099	PMP22	F2	ENSG00000111224	PARP11	S2	ENSG00000107719	PALD1	U5	ENSG00000186166	CENATAC	M5
ENSG00000109103	UNC119	F2	ENSG00000111237	VPS29	S2	ENSG00000107738	VSIR	U5	ENSG00000186310	NAP1L3	M5
ENSG00000109111	SUPT6H	F2	ENSG00000111247	RAD51AP1	S2	ENSG00000107771	CCSER2	U5	ENSG00000186377	CYP4X1	M5
ENSG00000109113	RAB34	F2	ENSG00000111261	MANSC1	S2	ENSG00000107798	LIPA	U5	ENSG00000186416	NKRF	M5
ENSG00000109158	GABRA4	F2	ENSG00000111262	KCNA1	S2	ENSG00000107815	TWNK	U5	ENSG00000186591	UBE2H	M5
ENSG00000109171	SLAIN2	F2	ENSG00000111269	CREBL2	S2	ENSG00000107833	NPM3	U5	ENSG00000187091	PLCD1	M5
ENSG00000109220	CHIC2	F2	ENSG00000111276	CDKN1B	S2	ENSG00000107951	MTPAP	U5	ENSG00000187189	TSPYL4	M5
ENSG00000109270	LAMTOR3	F2	ENSG00000111300	NAA25	S2	ENSG00000107959	PITRM1	U5	ENSG00000187446	CHP1	M5
ENSG00000109320	NFKB1	F2	ENSG00000111321	LTBR	S2	ENSG00000107968	MAP3K8	U5	ENSG00000187486	KCNJ11	M5
ENSG00000109323	MANBA	F2	ENSG00000111344	RASAL1	S2	ENSG00000108021	TASOR2	U5	ENSG00000187555	USP7	M5
ENSG00000109332	UBE2D3	F2	ENSG00000111348	ARHGDIB	S2	ENSG00000108055	SMC3	U5	ENSG00000188021	UBQLN2	M5
ENSG00000109390	NDUFC1	F2	ENSG00000111371	SLC38A1	S2	ENSG00000108061	SHOC2	U5	ENSG00000188026	RILPL1	M5
ENSG00000109436	TBC1D9	F2	ENSG00000111412	SPRING1	S2	ENSG00000108375	RNF43	U5	ENSG00000188039	NWD1	M5
ENSG00000109452	INPP4B	F2	ENSG00000111481	COPZ1	S2	ENSG00000108433	GOSR2	U5	ENSG00000188191	PRKAR1B	M5
ENSG00000109472	CPE	F2	ENSG00000111490	TBC1D30	S2	ENSG00000108465	CDK5RAP3	U5	ENSG00000188315	C3orf62	M5
ENSG00000109519	GRPEL1	F2	ENSG00000111530	CAND1	S2	ENSG00000108479	GALK1	U5	ENSG00000188566	NDOR1	M5
ENSG00000109534	GAR1	F2	ENSG00000111540	RAB5B	S2	ENSG00000108515	ENO3	U5	ENSG00000189091	SF3B3	M5
ENSG00000109572	CLCN3	F2	ENSG00000111554	MDM1	S2	ENSG00000108518	PFN1	U5	ENSG00000189241	TSPYL1	M5
ENSG00000109610	SOD3	F2	ENSG00000111581	NUP107	S2	ENSG00000108561	C1QBP	U5	ENSG00000196155	PLEKHG4	M5
ENSG00000109618	SEPSECS	F2	ENSG00000111596	CNOT2	S2	ENSG00000108604	SMARCD2	U5	ENSG00000196218	RYR1	M5
ENSG00000109667	SLC2A9	F2	ENSG00000111605	CPSF6	S2	ENSG00000108679	LGALS3BP	U5	ENSG00000196236	XPNPEP3	M5
ENSG00000109670	FBXW7	F2	ENSG00000111615	KRR1	S2	ENSG00000108774	RAB5C	U5	ENSG00000196365	LONP1	M5
ENSG00000109680	TBC1D19	F2	ENSG00000111641	NOP2	S2	ENSG00000108784	NAGLU	U5	ENSG00000196367	TRRAP	M5
ENSG00000109685	NSD2	F2	ENSG00000111642	CHD4	S2	ENSG00000108799	EZH1	U5	ENSG00000196576	PLXNB2	M5
ENSG00000109689	STIM2	F2	ENSG00000111647	BLTP3B	S2	ENSG00000108829	LRRC59	U5	ENSG00000196715	VKORC1L1	M5
ENSG00000109736	MFSD10	F2	ENSG00000111666	CHPT1	S2	ENSG00000108839	ALOX12	U5	ENSG00000196739	COL27A1	M5
ENSG00000109738	GLRB	F2	ENSG00000111667	USP5	S2	ENSG00000108883	EFTUD2	U5	ENSG00000196782	MAML3	M5
ENSG00000109762	SNX25	F2	ENSG00000111670	GNPTAB	S2	ENSG00000108950	FAM20A	U5	ENSG00000196924	FLNA	M5
ENSG00000109775	UFSP2	F2	ENSG00000111674	ENO2	S2	ENSG00000109084	TMEM97	U5	ENSG00000197586	ENTPD6	M5
ENSG00000109787	KLF3	F2	ENSG00000111678	C12orf57	S2	ENSG00000109099	PMP22	U5	ENSG00000197705	KLHL14	M5
ENSG00000109790	KLHL5	F2	ENSG00000111684	LPCAT3	S2	ENSG00000109118	PHF12	U5	ENSG00000197872	CYRIA	M5
ENSG00000109814	UGDH	F2	ENSG00000111696	NT5DC3	S2	ENSG00000109610	SOD3	U5	ENSG00000197912	SPG7	M5
ENSG00000109819	PPARGC1A	F2	ENSG00000111711	GOLT1B	S2	ENSG00000109956	B3GAT1	U5	ENSG00000197930	ERO1A	M5
ENSG00000109854	HTATIP2	F2	ENSG00000111726	CMAS	S2	ENSG00000110013	SIAE	U5	ENSG00000198216	CACNA1E	M5
ENSG00000109861	CTSC	F2	ENSG00000111727	HCFC2	S2	ENSG00000110047	EHD1	U5	ENSG00000198689	SLC9A6	M5
ENSG00000109881	CCDC34	F2	ENSG00000111728	ST8SIA1	S2	ENSG00000110104	CCDC86	U5	ENSG00000198876	DCAF12	M5
ENSG00000109911	ELP4	F2	ENSG00000111731	C2CD5	S2	ENSG00000110446	SLC15A3	U5	ENSG00000198894	CIPC	M5
ENSG00000109917	ZPR1	F2	ENSG00000111737	RAB35	S2	ENSG00000110492	MDK	U5	ENSG00000198932	GPRASP1	M5
ENSG00000109920	FNBP4	F2	ENSG00000111785	RIC8B	S2	ENSG00000110536	PTPMT1	U5	ENSG00000204315	FKBPL	M5
ENSG00000109929	SC5D	F2	ENSG00000111790	FGFR1OP2	S2	ENSG00000110619	CARS1	U5	ENSG00000204681	GABBR1	M5
ENSG00000109956	B3GAT1	F2	ENSG00000111802	TDP2	S2	ENSG00000110713	NUP98	U5	ENSG00000205629	LCMT1	M5
ENSG00000110011	DNAJC4	F2	ENSG00000111817	DSE	S2	ENSG00000110719	TCIRG1	U5	ENSG00000206418	RAB12	M5
ENSG00000110042	DTX4	F2	ENSG00000111832	RWDD1	S2	ENSG00000110768	GTF2H1	U5	ENSG00000213079	SCAF8	M5
ENSG00000110046	ATG2A	F2	ENSG00000111834	RSPH4A	S2	ENSG00000110925	CSRNP2	U5	ENSG00000213190	MLLT11	M5
ENSG00000110047	EHD1	F2	ENSG00000111837	MAK	S2	ENSG00000111344	RASAL1	U5	ENSG00000213760	ATP6V1G2	M5
ENSG00000110057	UNC93B1	F2	ENSG00000111843	TMEM14C	S2	ENSG00000111445	RFC5	U5	ENSG00000213928	IRF9	M5
ENSG00000110066	KMT5B	F2	ENSG00000111845	PAK1IP1	S2	ENSG00000111452	ADGRD1	U5	ENSG00000214376	VSTM5	M5
ENSG00000110074	FOXRED1	F2	ENSG00000111846	GCNT2	S2	ENSG00000111481	COPZ1	U5	ENSG00000214517	PPME1	M5
ENSG00000110075	PPP6R3	F2	ENSG00000111850	SMIM8	S2	ENSG00000111530	CAND1	U5	ENSG00000214655	ZSWIM8	M5
ENSG00000110104	CCDC86	F2	ENSG00000111859	NEDD9	S2	ENSG00000111647	BLTP3B	U5	ENSG00000215251	FASTKD5	M5
ENSG00000110107	PRPF19	F2	ENSG00000111860	CEP85L	S2	ENSG00000111674	ENO2	U5	ENSG00000225190	PLEKHM1	M5
ENSG00000110108	TMEM109	F2	ENSG00000111875	ASF1A	S2	ENSG00000111676	ATN1	U5	ENSG00000228594	FNDC10	M5
ENSG00000110171	TRIM3	F2	ENSG00000111877	MCM9	S2	ENSG00000111696	NT5DC3	U5	ENSG00000235711	ANKRD34C	M5
ENSG00000110172	CHORDC1	F2	ENSG00000111879	FAM184A	S2	ENSG00000111783	RFX4	U5	ENSG00000236609	ZNF853	M5
ENSG00000110237	ARHGEF17	F2	ENSG00000111880	RNGTT	S2	ENSG00000111837	MAK	U5	ENSG00000240694	PNMA2	M5
ENSG00000110321	EIF4G2	F2	ENSG00000111885	MAN1A1	S2	ENSG00000111846	GCNT2	U5	ENSG00000240720	LRRD1	M5
ENSG00000110324	IL10RA	F2	ENSG00000111897	SERINC1	S2	ENSG00000111906	HDDC2	U5	ENSG00000242028	HYPK	M5
ENSG00000110328	GALNT18	F2	ENSG00000111906	HDDC2	S2	ENSG00000111911	HINT3	U5	ENSG00000242802	AP5Z1	M5
ENSG00000110330	BIRC2	F2	ENSG00000111907	TPD52L1	S2	ENSG00000112031	MTRF1L	U5	ENSG00000243232	PCDHAC2	M5
ENSG00000110344	UBE4A	F2	ENSG00000111911	HINT3	S2	ENSG00000112053	SLC26A8	U5	ENSG00000243449	C4orf48	M5
ENSG00000110395	CBL	F2	ENSG00000111912	NCOA7	S2	ENSG00000112167	SAYSD1	U5	ENSG00000243646	IL10RB	M5
ENSG00000110400	NECTIN1	F2	ENSG00000111913	RIPOR2	S2	ENSG00000112208	BAG2	U5	ENSG00000248098	BCKDHA	M5
ENSG00000110422	HIPK3	F2	ENSG00000111961	SASH1	S2	ENSG00000112232	KHDRBS2	U5	ENSG00000253368	TRNP1	M5
ENSG00000110427	KIAA1549L	F2	ENSG00000111962	UST	S2	ENSG00000112234	FBXL4	U5	ENSG00000253719	ATXN7L3B	M5
ENSG00000110435	PDHX	F2	ENSG00000112029	FBXO5	S2	ENSG00000112237	CCNC	U5	ENSG00000253873	PCDHGA11	M5
ENSG00000110436	SLC1A2	F2	ENSG00000112031	MTRF1L	S2	ENSG00000112306	RPS12	U5	ENSG00000253910	PCDHGB2	M5
ENSG00000110442	COMMD9	F2	ENSG00000112038	OPRM1	S2	ENSG00000112511	PHF1	U5	ENSG00000253953	PCDHGB4	M5
ENSG00000110446	SLC15A3	F2	ENSG00000112062	MAPK14	S2	ENSG00000112679	DUSP22	U5	ENSG00000254122	PCDHGB7	M5
ENSG00000110455	ACCS	F2	ENSG00000112078	KCTD20	S2	ENSG00000112699	GMDS	U5	ENSG00000254726	MEX3A	M5
ENSG00000110492	MDK	F2	ENSG00000112081	SRSF3	S2	ENSG00000112701	SENP6	U5	ENSG00000261115	TMEM178B	M5
ENSG00000110497	AMBRA1	F2	ENSG00000112110	MRPL18	S2	ENSG00000112759	SLC29A1	U5	ENSG00000266094	RASSF5	M5
ENSG00000110514	MADD	F2	ENSG00000112118	MCM3	S2	ENSG00000112787	FBRSL1	U5	ENSG00000267060	PTGES3L	M5
ENSG00000110536	PTPMT1	F2	ENSG00000112137	PHACTR1	S2	ENSG00000112796	ENPP5	U5	ENSG00000276547	PCDHGB5	M5
ENSG00000110583	NAA40	F2	ENSG00000112146	FBXO9	S2	ENSG00000112874	NUDT12	U5	ENSG00000276600	RAB7B	M5
ENSG00000110619	CARS1	F2	ENSG00000112149	CD83	S2	ENSG00000112977	DAP	U5	ENSG00000001167	NFYA	M6
ENSG00000110660	SLC35F2	F2	ENSG00000112159	MDN1	S2	ENSG00000112996	MRPS30	U5	ENSG00000003147	ICA1	M6
ENSG00000110675	ELMOD1	F2	ENSG00000112183	RBM24	S2	ENSG00000113163	CERT1	U5	ENSG00000005302	MSL3	M6
ENSG00000110693	SOX6	F2	ENSG00000112186	CAP2	S2	ENSG00000113212	PCDHB7	U5	ENSG00000007923	DNAJC11	M6
ENSG00000110696	C11orf58	F2	ENSG00000112200	ZNF451	S2	ENSG00000113269	RNF130	U5	ENSG00000008838	MED24	M6
ENSG00000110700	RPS13	F2	ENSG00000112210	RAB23	S2	ENSG00000113272	THG1L	U5	ENSG00000009790	TRAF3IP3	M6
ENSG00000110711	AIP	F2	ENSG00000112218	GPR63	S2	ENSG00000113282	CLINT1	U5	ENSG00000011083	SLC6A7	M6
ENSG00000110713	NUP98	F2	ENSG00000112232	KHDRBS2	S2	ENSG00000113328	CCNG1	U5	ENSG00000013016	EHD3	M6
ENSG00000110717	NDUFS8	F2	ENSG00000112234	FBXL4	S2	ENSG00000113368	LMNB1	U5	ENSG00000013288	MAN2B2	M6
ENSG00000110719	TCIRG1	F2	ENSG00000112237	CCNC	S2	ENSG00000113569	NUP155	U5	ENSG00000029153	BMAL2	M6
ENSG00000110721	CHKA	F2	ENSG00000112242	E2F3	S2	ENSG00000113649	TCERG1	U5	ENSG00000038219	BOD1L1	M6
ENSG00000110723	EXPH5	F2	ENSG00000112249	ASCC3	S2	ENSG00000113812	ACTR8	U5	ENSG00000044446	PHKA2	M6
ENSG00000110756	HPS5	F2	ENSG00000112276	BVES	S2	ENSG00000113845	TIMMDC1	U5	ENSG00000047056	WDR37	M6
ENSG00000110768	GTF2H1	F2	ENSG00000112282	MED23	S2	ENSG00000113916	BCL6	U5	ENSG00000047410	TPR	M6
ENSG00000110786	PTPN5	F2	ENSG00000112290	WASF1	S2	ENSG00000113966	ARL6	U5	ENSG00000052841	TTC17	M6
ENSG00000110799	VWF	F2	ENSG00000112293	GPLD1	S2	ENSG00000114030	KPNA1	U5	ENSG00000054267	ARID4B	M6
ENSG00000110801	PSMD9	F2	ENSG00000112294	ALDH5A1	S2	ENSG00000114054	PCCB	U5	ENSG00000054793	ATP9A	M6
ENSG00000110851	PRDM4	F2	ENSG00000112305	SMAP1	S2	ENSG00000114127	XRN1	U5	ENSG00000057252	SOAT1	M6
ENSG00000110871	COQ5	F2	ENSG00000112308	C6orf62	S2	ENSG00000114209	PDCD10	U5	ENSG00000058335	RASGRF1	M6
ENSG00000110881	ASIC1	F2	ENSG00000112309	B3GAT2	S2	ENSG00000114316	USP4	U5	ENSG00000058668	ATP2B4	M6
ENSG00000110888	CAPRIN2	F2	ENSG00000112320	SOBP	S2	ENSG00000114378	HYAL1	U5	ENSG00000060656	PTPRU	M6
ENSG00000110906	KCTD10	F2	ENSG00000112333	NR2E1	S2	ENSG00000114388	NPRL2	U5	ENSG00000065911	MTHFD2	M6
ENSG00000110911	SLC11A2	F2	ENSG00000112357	PEX7	S2	ENSG00000114423	CBLB	U5	ENSG00000067798	NAV3	M6
ENSG00000110917	MLEC	F2	ENSG00000112367	FIG4	S2	ENSG00000114450	GNB4	U5	ENSG00000067842	ATP2B3	M6
ENSG00000110921	MVK	F2	ENSG00000112378	PERP	S2	ENSG00000114529	C3orf52	U5	ENSG00000067992	PDK3	M6
ENSG00000110934	BIN2	F2	ENSG00000112379	ARFGEF3	S2	ENSG00000114735	HEMK1	U5	ENSG00000070476	ZXDC	M6
ENSG00000110955	ATP5F1B	F2	ENSG00000112394	SLC16A10	S2	ENSG00000114739	ACVR2B	U5	ENSG00000072121	ZFYVE26	M6
ENSG00000111011	RSRC2	F2	ENSG00000112406	HECA	S2	ENSG00000115053	NCL	U5	ENSG00000073910	FRY	M6
ENSG00000111052	LIN7A	F2	ENSG00000112414	ADGRG6	S2	ENSG00000115145	STAM2	U5	ENSG00000075292	ZNF638	M6
ENSG00000111077	TNS2	F2	ENSG00000112419	PHACTR2	S2	ENSG00000115216	NRBP1	U5	ENSG00000075340	ADD2	M6
ENSG00000111110	PPM1H	F2	ENSG00000112425	EPM2A	S2	ENSG00000115234	SNX17	U5	ENSG00000076003	MCM6	M6
ENSG00000111142	METAP2	F2	ENSG00000112473	SLC39A7	S2	ENSG00000115275	MOGS	U5	ENSG00000077044	DGKD	M6
ENSG00000111186	WNT5B	F2	ENSG00000112531	QKI	S2	ENSG00000115295	CLIP4	U5	ENSG00000082512	TRAF5	M6
ENSG00000111229	ARPC3	F2	ENSG00000112562	SMOC2	S2	ENSG00000115325	DOK1	U5	ENSG00000082516	GEMIN5	M6
ENSG00000111247	RAD51AP1	F2	ENSG00000112576	CCND3	S2	ENSG00000115368	WDR75	U5	ENSG00000085377	PREP	M6
ENSG00000111261	MANSC1	F2	ENSG00000112584	FAM120B	S2	ENSG00000115415	STAT1	U5	ENSG00000085415	SEH1L	M6
ENSG00000111269	CREBL2	F2	ENSG00000112592	TBP	S2	ENSG00000115425	PECR	U5	ENSG00000087299	L2HGDH	M6
ENSG00000111276	CDKN1B	F2	ENSG00000112658	SRF	S2	ENSG00000115548	KDM3A	U5	ENSG00000088826	SMOX	M6
ENSG00000111300	NAA25	F2	ENSG00000112679	DUSP22	S2	ENSG00000115561	CHMP3	U5	ENSG00000088930	XRN2	M6
ENSG00000111321	LTBR	F2	ENSG00000112685	EXOC2	S2	ENSG00000115598	IL1RL2	U5	ENSG00000089048	ESF1	M6
ENSG00000111325	OGFOD2	F2	ENSG00000112695	COX7A2	S2	ENSG00000115657	ABCB6	U5	ENSG00000100104	SRRD	M6
ENSG00000111341	MGP	F2	ENSG00000112697	TMEM30A	S2	ENSG00000115665	SLC5A7	U5	ENSG00000100281	HMGXB4	M6
ENSG00000111344	RASAL1	F2	ENSG00000112699	GMDS	S2	ENSG00000115694	STK25	U5	ENSG00000100314	CABP7	M6
ENSG00000111358	GTF2H3	F2	ENSG00000112701	SENP6	S2	ENSG00000115750	TAF1B	U5	ENSG00000100321	SYNGR1	M6
ENSG00000111361	EIF2B1	F2	ENSG00000112739	PRPF4B	S2	ENSG00000115761	NOL10	U5	ENSG00000100815	TRIP11	M6
ENSG00000111452	ADGRD1	F2	ENSG00000112759	SLC29A1	S2	ENSG00000115839	RAB3GAP1	U5	ENSG00000101204	CHRNA4	M6
ENSG00000111490	TBC1D30	F2	ENSG00000112769	LAMA4	S2	ENSG00000115844	DLX2	U5	ENSG00000101276	SLC52A3	M6
ENSG00000111540	RAB5B	F2	ENSG00000112773	TENT5A	S2	ENSG00000116001	TIA1	U5	ENSG00000101452	DHX35	M6
ENSG00000111554	MDM1	F2	ENSG00000112796	ENPP5	S2	ENSG00000116017	ARID3A	U5	ENSG00000101639	CEP192	M6
ENSG00000111581	NUP107	F2	ENSG00000112837	TBX18	S2	ENSG00000116095	PLEKHA3	U5	ENSG00000101751	POLI	M6
ENSG00000111596	CNOT2	F2	ENSG00000112852	PCDHB2	S2	ENSG00000116212	LRRC42	U5	ENSG00000102189	EEA1	M6
ENSG00000111602	TIMELESS	F2	ENSG00000112855	HARS2	S2	ENSG00000116221	MRPL37	U5	ENSG00000102226	USP11	M6
ENSG00000111605	CPSF6	F2	ENSG00000112874	NUDT12	S2	ENSG00000116260	QSOX1	U5	ENSG00000103351	CLUAP1	M6
ENSG00000111615	KRR1	F2	ENSG00000112902	SEMA5A	S2	ENSG00000116521	SCAMP3	U5	ENSG00000104635	SLC39A14	M6
ENSG00000111639	MRPL51	F2	ENSG00000112936	C7	S2	ENSG00000116525	TRIM62	U5	ENSG00000104805	NUCB1	M6
ENSG00000111641	NOP2	F2	ENSG00000112941	TENT4A	S2	ENSG00000116604	MEF2D	U5	ENSG00000105223	PLD3	M6
ENSG00000111642	CHD4	F2	ENSG00000112964	GHR	S2	ENSG00000116649	SRM	U5	ENSG00000105255	FSD1	M6
ENSG00000111647	BLTP3B	F2	ENSG00000112972	HMGCS1	S2	ENSG00000116690	PRG4	U5	ENSG00000105472	CLEC11A	M6
ENSG00000111652	COPS7A	F2	ENSG00000112981	NME5	S2	ENSG00000116691	MIIP	U5	ENSG00000105649	RAB3A	M6
ENSG00000111653	ING4	F2	ENSG00000112983	BRD8	S2	ENSG00000116750	UCHL5	U5	ENSG00000105696	TMEM59L	M6
ENSG00000111666	CHPT1	F2	ENSG00000112996	MRPS30	S2	ENSG00000116922	C1orf109	U5	ENSG00000106003	LFNG	M6
ENSG00000111667	USP5	F2	ENSG00000113013	HSPA9	S2	ENSG00000116981	NT5C1A	U5	ENSG00000106278	PTPRZ1	M6
ENSG00000111669	TPI1	F2	ENSG00000113070	HBEGF	S2	ENSG00000116990	MYCL	U5	ENSG00000106976	DNM1	M6
ENSG00000111671	SPSB2	F2	ENSG00000113100	CDH9	S2	ENSG00000117000	RLF	U5	ENSG00000107242	PIP5K1B	M6
ENSG00000111674	ENO2	F2	ENSG00000113140	SPARC	S2	ENSG00000117013	KCNQ4	U5	ENSG00000108797	CNTNAP1	M6
ENSG00000111679	PTPN6	F2	ENSG00000113141	IK	S2	ENSG00000117133	RPF1	U5	ENSG00000108854	SMURF2	M6
ENSG00000111684	LPCAT3	F2	ENSG00000113161	HMGCR	S2	ENSG00000117153	KLHL12	U5	ENSG00000109339	MAPK10	M6
ENSG00000111696	NT5DC3	F2	ENSG00000113163	CERT1	S2	ENSG00000117280	RAB29	U5	ENSG00000111358	GTF2H3	M6
ENSG00000111707	SUDS3	F2	ENSG00000113194	FAF2	S2	ENSG00000117362	APH1A	U5	ENSG00000112029	FBXO5	M6
ENSG00000111725	PRKAB1	F2	ENSG00000113211	PCDHB6	S2	ENSG00000117394	SLC2A1	U5	ENSG00000112218	GPR63	M6
ENSG00000111727	HCFC2	F2	ENSG00000113212	PCDHB7	S2	ENSG00000117408	IPO13	U5	ENSG00000112297	CRYBG1	M6
ENSG00000111731	C2CD5	F2	ENSG00000113231	PDE8B	S2	ENSG00000117569	PTBP2	U5	ENSG00000114439	BBX	M6
ENSG00000111737	RAB35	F2	ENSG00000113240	CLK4	S2	ENSG00000117597	UTP25	U5	ENSG00000115112	TFCP2L1	M6
ENSG00000111752	PHC1	F2	ENSG00000113248	PCDHB15	S2	ENSG00000117600	PLPPR4	U5	ENSG00000115145	STAM2	M6
ENSG00000111775	COX6A1	F2	ENSG00000113263	ITK	S2	ENSG00000117640	MTFR1L	U5	ENSG00000115318	LOXL3	M6
ENSG00000111783	RFX4	F2	ENSG00000113269	RNF130	S2	ENSG00000117676	RPS6KA1	U5	ENSG00000115970	THADA	M6
ENSG00000111785	RIC8B	F2	ENSG00000113272	THG1L	S2	ENSG00000117691	NENF	U5	ENSG00000115977	AAK1	M6
ENSG00000111802	TDP2	F2	ENSG00000113273	ARSB	S2	ENSG00000117748	RPA2	U5	ENSG00000116106	EPHA4	M6
ENSG00000111817	DSE	F2	ENSG00000113282	CLINT1	S2	ENSG00000118156	ZNF541	U5	ENSG00000116497	S100PBP	M6
ENSG00000111837	MAK	F2	ENSG00000113300	CNOT6	S2	ENSG00000118242	MREG	U5	ENSG00000116668	SWT1	M6
ENSG00000111845	PAK1IP1	F2	ENSG00000113312	TTC1	S2	ENSG00000118402	ELOVL4	U5	ENSG00000117114	ADGRL2	M6
ENSG00000111850	SMIM8	F2	ENSG00000113318	MSH3	S2	ENSG00000118420	UBE3D	U5	ENSG00000117899	MESD	M6
ENSG00000111859	NEDD9	F2	ENSG00000113319	RASGRF2	S2	ENSG00000118804	STBD1	U5	ENSG00000118898	PPL	M6
ENSG00000111860	CEP85L	F2	ENSG00000113327	GABRG2	S2	ENSG00000118960	HS1BP3	U5	ENSG00000118922	KLF12	M6
ENSG00000111875	ASF1A	F2	ENSG00000113328	CCNG1	S2	ENSG00000118961	LDAH	U5	ENSG00000118971	CCND2	M6
ENSG00000111877	MCM9	F2	ENSG00000113360	DROSHA	S2	ENSG00000118965	WDR35	U5	ENSG00000119185	ITGB1BP1	M6
ENSG00000111879	FAM184A	F2	ENSG00000113361	CDH6	S2	ENSG00000118971	CCND2	U5	ENSG00000120158	RCL1	M6
ENSG00000111880	RNGTT	F2	ENSG00000113368	LMNB1	S2	ENSG00000119333	DYNC2I2	U5	ENSG00000120253	NUP43	M6
ENSG00000111885	MAN1A1	F2	ENSG00000113384	GOLPH3	S2	ENSG00000119383	PTPA	U5	ENSG00000120451	SNX19	M6
ENSG00000111907	TPD52L1	F2	ENSG00000113387	SUB1	S2	ENSG00000119414	PPP6C	U5	ENSG00000121390	PSPC1	M6
ENSG00000111911	HINT3	F2	ENSG00000113389	NPR3	S2	ENSG00000119431	HDHD3	U5	ENSG00000121871	SLITRK3	M6
ENSG00000111913	RIPOR2	F2	ENSG00000113391	FAM172A	S2	ENSG00000119509	INVS	U5	ENSG00000122390	NAA60	M6
ENSG00000111961	SASH1	F2	ENSG00000113407	TARS1	S2	ENSG00000119537	KDSR	U5	ENSG00000124140	SLC12A5	M6
[truncated: 23,800 more rows]

## Sheet: DEG.enrichment.FMT.module
set1_Name	set2_Name	Background	set1_size	set2_size	expected.overlap	actual.overlap	enrichment.foldchange	odds.ratio	FET_pvalue	intersects
FMT	F3	12106	339	2804	78.5194	149	1.89762	2.69132	8.14392e-18	ENSG00000154027,ENSG00000116918,ENSG00000180287,ENSG00000162639,ENSG00000083444,ENSG00000117115,ENSG00000066322,ENSG00000143418,ENSG00000143479,ENSG00000188643,ENSG00000213088,ENSG00000143409,ENSG00000116473,ENSG00000162461,ENSG00000116741,ENSG00000169504,ENSG00000196975,ENSG00000091428,ENSG00000196872,ENSG00000171848,ENSG00000144306,ENSG00000144468,ENSG00000135926,ENSG00000091106,ENSG00000243147…
FMT	F5	12106	339	346	9.68891	0	0	0	1
FMT	F6	12106	339	342	9.5769	4	0.417672	0.403765	0.987753	ENSG00000170144,ENSG00000109787,ENSG00000061337,ENSG00000129951
FMT	F7	12106	339	862	24.1383	17	0.704276	0.682441	0.954974	ENSG00000263528,ENSG00000136059,ENSG00000198729,ENSG00000123575,ENSG00000135046,ENSG00000119509,ENSG00000177125,ENSG00000173227,ENSG00000107959,ENSG00000165568,ENSG00000089154,ENSG00000182718,ENSG00000142494,ENSG00000198026,ENSG00000167483,ENSG00000104856,ENSG00000100097
FMT	F9	12106	339	524	14.6734	3	0.204452	0.192741	0.999965	ENSG00000129187,ENSG00000147231,ENSG00000011105
FMT	F10	12106	339	294	8.23278	0	0	0	1
FMT	F12	12106	339	426	11.9291	11	0.922113	0.917372	0.651877	ENSG00000153558,ENSG00000229453,ENSG00000168811,ENSG00000204264,ENSG00000170632,ENSG00000197150,ENSG00000102359,ENSG00000177106,ENSG00000156042,ENSG00000188266,ENSG00000108839
FMT	F13	12106	339	368	10.305	9	0.873365	0.866657	0.707665	ENSG00000163412,ENSG00000173905,ENSG00000082068,ENSG00000123213,ENSG00000168453,ENSG00000136870,ENSG00000102802,ENSG00000100433,ENSG00000179148
FMT	F17	12106	339	79	2.21221	0	0	0	1
FMT	F18	12106	339	1151	32.231	14	0.434364	0.402754	0.999952	ENSG00000057252,ENSG00000197852,ENSG00000143816,ENSG00000186283,ENSG00000156959,ENSG00000186352,ENSG00000164638,ENSG00000056277,ENSG00000110756,ENSG00000120690,ENSG00000090470,ENSG00000141349,ENSG00000173821,ENSG00000101265
FMT	F19	12106	339	182	5.09648	3	0.588641	0.57803	0.888538	ENSG00000160685,ENSG00000138439,ENSG00000106070
FMT	F20	12106	339	77	2.1562	5	2.31889	2.43126	0.0644981	ENSG00000155511,ENSG00000106991,ENSG00000173258,ENSG00000179104,ENSG00000161298
FMT	F21	12106	339	54	1.51214	0	0	0	1
FMT	F22	12106	339	299	8.37279	1	0.119434	0.113849	0.999816	ENSG00000116690
FMT	F23	12106	339	295	8.26078	8	0.968432	0.96677	0.587305	ENSG00000137936,ENSG00000159588,ENSG00000162706,ENSG00000163673,ENSG00000129472,ENSG00000168807,ENSG00000109099,ENSG00000099840
FMT	F24	12106	339	250	7.00066	12	1.71412	1.77754	0.0489902	ENSG00000143748,ENSG00000157036,ENSG00000145246,ENSG00000164035,ENSG00000122008,ENSG00000146072,ENSG00000241127,ENSG00000105989,ENSG00000135052,ENSG00000174804,ENSG00000149269,ENSG00000129566
FMT	F25	12106	339	186	5.20849	0	0	0	1
FMT	F26	12106	339	85	2.38022	2	0.840257	0.835447	0.6926	ENSG00000134248,ENSG00000096092
FMT	F27	12106	339	66	1.84817	1	0.541074	0.532654	0.847359	ENSG00000167515
FMT	F28	12106	339	173	4.84446	2	0.412843	0.402471	0.95706	ENSG00000180914,ENSG00000091664
FMT	F31	12106	339	66	1.84817	5	2.70537	2.87233	0.0372223	ENSG00000138678,ENSG00000106771,ENSG00000110400,ENSG00000184922,ENSG00000085415
FMT	F32	12106	339	74	2.0722	8	3.86064	4.28403	0.00104987	ENSG00000058085,ENSG00000123689,ENSG00000269964,ENSG00000165168,ENSG00000185507,ENSG00000129009,ENSG00000068079,ENSG00000108679
FMT	F33	12106	339	63	1.76417	0	0	0	1
FMT	F34	12106	339	95	2.66025	2	0.751809	0.744981	0.749615	ENSG00000155868,ENSG00000172992
FMT	F37	12106	339	109	3.05229	1	0.327623	0.319408	0.955396	ENSG00000108352
FMT	F39	12106	339	70	1.96019	0	0	0	1
FMT	F40	12106	339	62	1.73616	0	0	0	1
FMT	F41	12106	339	80	2.24021	1	0.446386	0.437741	0.897688	ENSG00000180801
FMT	F42	12106	339	76	2.1282	3	1.40964	1.43021	0.358541	ENSG00000240065,ENSG00000136830,ENSG00000136155
FMT	F43	12106	339	98	2.74426	1	0.364397	0.355964	0.938872	ENSG00000080573
FMT	F44	12106	339	58	1.62415	4	2.46282	2.58961	0.0789408	ENSG00000185736,ENSG00000111615,ENSG00000126803,ENSG00000121073
FMT	F45	12106	339	72	2.01619	1	0.495985	0.487395	0.871402	ENSG00000169855
FMT	F46	12106	339	63	1.76417	1	0.56684	0.55857	0.833707	ENSG00000132623
FMT	F64	12106	339	2064	57.7975	148	2.56067	3.98333	2.25195e-31	ENSG00000154027,ENSG00000116918,ENSG00000180287,ENSG00000162639,ENSG00000083444,ENSG00000117115,ENSG00000066322,ENSG00000143418,ENSG00000143479,ENSG00000188643,ENSG00000213088,ENSG00000143409,ENSG00000116473,ENSG00000116741,ENSG00000169504,ENSG00000196975,ENSG00000091428,ENSG00000196872,ENSG00000171848,ENSG00000144306,ENSG00000144468,ENSG00000135926,ENSG00000091106,ENSG00000243147,ENSG00000135636…
FMT	F65	12106	339	740	20.722	1	0.048258	0.0441723	1	ENSG00000162461
FMT	F66	12106	339	57	1.59615	0	0	0	1
FMT	F81	12106	339	62	1.73616	0	0	0	1
FMT	F82	12106	339	78	2.18421	0	0	0	1
FMT	F102	12106	339	88	2.46423	0	0	0	1
FMT	F103	12106	339	91	2.54824	0	0	0	1
FMT	F105	12106	339	59	1.65216	0	0	0	1
FMT	F107	12106	339	115	3.2203	1	0.31053	0.302442	0.962445	ENSG00000119509
FMT	F109	12106	339	51	1.42813	0	0	0	1
FMT	F132	12106	339	71	1.98819	0	0	0	1
FMT	F133	12106	339	115	3.2203	0	0	0	1
FMT	F134	12106	339	61	1.70816	0	0	0	1
FMT	F150	12106	339	181	5.06848	0	0	0	1
FMT	F155	12106	339	97	2.71626	2	0.736308	0.729173	0.759866	ENSG00000170632,ENSG00000197150
FMT	F156	12106	339	72	2.01619	0	0	0	1
FMT	F159	12106	339	79	2.21221	0	0	0	1
FMT	F168	12106	339	61	1.70816	0	0	0	1
FMT	F169	12106	339	69	1.93218	0	0	0	1
FMT	F190	12106	339	54	1.51214	0	0	0	1
FMT	F194	12106	339	67	1.87618	0	0	0	1
FMT	F195	12106	339	250	7.00066	0	0	0	1
FMT	F196	12106	339	83	2.32422	0	0	0	1
FMT	F197	12106	339	81	2.26821	0	0	0	1
FMT	F198	12106	339	54	1.51214	0	0	0	1
FMT	F203	12106	339	50	1.40013	0	0	0	1
FMT	F232	12106	339	118	3.30431	0	0	0	1
FMT	F243	12106	339	87	2.43623	0	0	0	1
FMT	F259	12106	339	70	1.96019	0	0	0	1
FMT	F263	12106	339	50	1.40013	0	0	0	1
FMT	F270	12106	339	227	6.3566	12	1.8878	1.9716	0.0262037	ENSG00000143748,ENSG00000157036,ENSG00000145246,ENSG00000164035,ENSG00000122008,ENSG00000146072,ENSG00000241127,ENSG00000105989,ENSG00000135052,ENSG00000174804,ENSG00000149269,ENSG00000129566
FMT	F273	12106	339	50	1.40013	0	0	0	1
FMT	F288	12106	339	52	1.45614	0	0	0	1
FMT	F326	12106	339	64	1.79217	0	0	0	1
FMT	F345	12106	339	51	1.42813	3	2.10064	2.17968	0.171008	ENSG00000185736,ENSG00000126803,ENSG00000121073
FMT	F347	12106	339	60	1.68016	1	0.595182	0.587121	0.818837	ENSG00000169855
FMT	F388	12106	339	188	5.2645	18	3.41913	3.82465	5.48125e-06	ENSG00000066322,ENSG00000143479,ENSG00000091428,ENSG00000144306,ENSG00000135926,ENSG00000044524,ENSG00000196639,ENSG00000007944,ENSG00000172426,ENSG00000204580,ENSG00000099282,ENSG00000111218,ENSG00000227051,ENSG00000167930,ENSG00000173805,ENSG00000275832,ENSG00000006042,ENSG00000078804
FMT	F389	12106	339	467	13.0772	53	4.05284	5.08045	1.2457e-18	ENSG00000116918,ENSG00000180287,ENSG00000117115,ENSG00000143418,ENSG00000188643,ENSG00000116473,ENSG00000116741,ENSG00000169504,ENSG00000196872,ENSG00000162998,ENSG00000001617,ENSG00000144648,ENSG00000154928,ENSG00000109501,ENSG00000215217,ENSG00000164292,ENSG00000185305,ENSG00000145569,ENSG00000137221,ENSG00000204052,ENSG00000130429,ENSG00000130822,ENSG00000197892,ENSG00000168522,ENSG00000185189…
FMT	F391	12106	339	107	2.99628	6	2.00248	2.08107	0.0797793	ENSG00000144468,ENSG00000157240,ENSG00000214050,ENSG00000136895,ENSG00000111266,ENSG00000140807
FMT	F392	12106	339	102	2.85627	0	0	0	1
FMT	F394	12106	339	155	4.34041	0	0	0	1
FMT	F396	12106	339	85	2.38022	16	6.72205	8.39427	1.36953e-09	ENSG00000213088,ENSG00000171848,ENSG00000135636,ENSG00000163491,ENSG00000113387,ENSG00000113212,ENSG00000078269,ENSG00000172331,ENSG00000076716,ENSG00000130055,ENSG00000127334,ENSG00000136153,ENSG00000213928,ENSG00000141012,ENSG00000154914,ENSG00000187905
FMT	F397	12106	339	83	2.32422	0	0	0	1
FMT	F398	12106	339	69	1.93218	0	0	0	1
FMT	F399	12106	339	105	2.94028	18	6.12187	7.52623	6.26143e-10	ENSG00000154027,ENSG00000083444,ENSG00000143409,ENSG00000173402,ENSG00000163527,ENSG00000179796,ENSG00000025039,ENSG00000164889,ENSG00000122574,ENSG00000102032,ENSG00000147912,ENSG00000177830,ENSG00000122367,ENSG00000166888,ENSG00000140090,ENSG00000129250,ENSG00000124225,ENSG00000198355
FMT	F400	12106	339	121	3.38832	3	0.885395	0.88144	0.663163	ENSG00000162639,ENSG00000085117,ENSG00000176533
FMT	F402	12106	339	56	1.56815	2	1.27539	1.28725	0.467771	ENSG00000091106,ENSG00000165572
FMT	F533	12106	339	76	2.1282	0	0	0	1
FMT	F535	12106	339	51	1.42813	0	0	0	1
FMT	F595	12106	339	53	1.48414	0	0	0	1
FMT	F660	12106	339	76	2.1282	2	0.939761	0.93777	0.632531	ENSG00000170632,ENSG00000197150
FMT	F718	12106	339	61	1.70816	0	0	0	1
FMT	F719	12106	339	79	2.21221	0	0	0	1
FMT	F797	12106	339	57	1.59615	0	0	0	1
FMT	F1035	12106	339	121	3.38832	15	4.42697	5.09126	1.37586e-06	ENSG00000066322,ENSG00000091428,ENSG00000135926,ENSG00000044524,ENSG00000196639,ENSG00000007944,ENSG00000204580,ENSG00000099282,ENSG00000111218,ENSG00000227051,ENSG00000167930,ENSG00000173805,ENSG00000275832,ENSG00000006042,ENSG00000078804
FMT	F1040	12106	339	145	4.06038	17	4.1868	4.79946	6.07261e-07	ENSG00000116918,ENSG00000117115,ENSG00000116473,ENSG00000169504,ENSG00000196872,ENSG00000154928,ENSG00000197892,ENSG00000185189,ENSG00000196422,ENSG00000183908,ENSG00000176485,ENSG00000166387,ENSG00000066468,ENSG00000198270,ENSG00000010278,ENSG00000073417,ENSG00000102934
FMT	F1041	12106	339	51	1.42813	5	3.50107	3.81385	0.0136909	ENSG00000215217,ENSG00000130822,ENSG00000152558,ENSG00000186532,ENSG00000101230
FMT	F1075	12106	339	59	1.65216	0	0	0	1
FMT	F1101	12106	339	57	1.59615	8	5.01206	5.77832	0.000173759	ENSG00000154027,ENSG00000083444,ENSG00000143409,ENSG00000179796,ENSG00000164889,ENSG00000166888,ENSG00000140090,ENSG00000129250
FMT	F1479	12106	339	98	2.74426	15	5.46596	6.51465	8.33952e-08	ENSG00000116918,ENSG00000117115,ENSG00000116473,ENSG00000169504,ENSG00000196872,ENSG00000197892,ENSG00000185189,ENSG00000196422,ENSG00000183908,ENSG00000176485,ENSG00000166387,ENSG00000066468,ENSG00000010278,ENSG00000073417,ENSG00000102934
CSDS	F3	12106	334	2804	77.3613	108	1.39605	1.60868	6.45463e-05	ENSG00000158292,ENSG00000183317,ENSG00000143013,ENSG00000162630,ENSG00000182004,ENSG00000134207,ENSG00000187608,ENSG00000117643,ENSG00000160678,ENSG00000117475,ENSG00000225556,ENSG00000116981,ENSG00000023902,ENSG00000162878,ENSG00000150551,ENSG00000168702,ENSG00000177519,ENSG00000138433,ENSG00000144229,ENSG00000115194,ENSG00000152056,ENSG00000162998,ENSG00000121440,ENSG00000044524,ENSG00000114450…
CSDS	F5	12106	334	346	9.54601	4	0.419023	0.405124	0.987465	ENSG00000170234,ENSG00000147606,ENSG00000164823,ENSG00000028277
CSDS	F6	12106	334	342	9.43565	6	0.635886	0.622617	0.914461	ENSG00000126091,ENSG00000134321,ENSG00000147862,ENSG00000240771,ENSG00000111554,ENSG00000168734
CSDS	F7	12106	334	862	23.7823	11	0.46253	0.437063	0.999202	ENSG00000143365,ENSG00000136059,ENSG00000145242,ENSG00000180822,ENSG00000105866,ENSG00000214309,ENSG00000043591,ENSG00000111653,ENSG00000180185,ENSG00000105559,ENSG00000105088
CSDS	F9	12106	334	524	14.457	8	0.553367	0.535315	0.979002	ENSG00000049323,ENSG00000163359,ENSG00000150630,ENSG00000204291,ENSG00000122140,ENSG00000166261,ENSG00000151208,ENSG00000104983
CSDS	F10	12106	334	294	8.11135	7	0.862988	0.856651	0.706619	ENSG00000176597,ENSG00000164466,ENSG00000122585,ENSG00000154188,ENSG00000148057,ENSG00000165821,ENSG00000185838
CSDS	F12	12106	334	426	11.7532	9	0.76575	0.754077	0.836571	ENSG00000137965,ENSG00000153253,ENSG00000163939,ENSG00000171159,ENSG00000139405,ENSG00000140044,ENSG00000138623,ENSG00000161647,ENSG00000196867
CSDS	F13	12106	334	368	10.153	14	1.37891	1.41106	0.140505	ENSG00000185946,ENSG00000060718,ENSG00000057019,ENSG00000156990,ENSG00000157014,ENSG00000176018,ENSG00000153993,ENSG00000168453,ENSG00000148123,ENSG00000166833,ENSG00000165899,ENSG00000076248,ENSG00000141526,ENSG00000125843
CSDS	F17	12106	334	79	2.17958	0	0	0	1
CSDS	F18	12106	334	1151	31.7557	24	0.755771	0.731276	0.945486	ENSG00000134247,ENSG00000142910,ENSG00000134250,ENSG00000138413,ENSG00000115267,ENSG00000174839,ENSG00000168743,ENSG00000124785,ENSG00000112514,ENSG00000091831,ENSG00000153975,ENSG00000106080,ENSG00000082556,ENSG00000275074,ENSG00000187486,ENSG00000154146,ENSG00000100578,ENSG00000177374,ENSG00000167281,ENSG00000168502,ENSG00000171873,ENSG00000101335,ENSG00000100346,ENSG00000177692
CSDS	F19	12106	334	182	5.02131	3	0.597453	0.587014	0.88249	ENSG00000198216,ENSG00000182179,ENSG00000103175
CSDS	F20	12106	334	77	2.1244	3	1.41216	1.43268	0.357493	ENSG00000214021,ENSG00000173258,ENSG00000161270
CSDS	F21	12106	334	54	1.48984	2	1.34243	1.3577	0.441419	ENSG00000138449,ENSG00000130589
CSDS	F22	12106	334	299	8.2493	12	1.45467	1.49125	0.124974	ENSG00000116962,ENSG00000144476,ENSG00000127241,ENSG00000172403,ENSG00000170624,ENSG00000164690,ENSG00000135124,ENSG00000131979,ENSG00000131480,ENSG00000170412,ENSG00000101353,ENSG00000214456
CSDS	F23	12106	334	295	8.13894	11	1.35153	1.37752	0.193032	ENSG00000157184,ENSG00000163399,ENSG00000171819,ENSG00000013441,ENSG00000135318,ENSG00000112562,ENSG00000185585,ENSG00000130653,ENSG00000166750,ENSG00000181045,ENSG00000154645
CSDS	F24	12106	334	250	6.89741	4	0.579928	0.567939	0.917903	ENSG00000153046,ENSG00000203760,ENSG00000138182,ENSG00000111581
CSDS	F25	12106	334	186	5.13167	6	1.16921	1.17803	0.407584	ENSG00000204618,ENSG00000091137,ENSG00000111602,ENSG00000005810,ENSG00000171451,ENSG00000198046
CSDS	F26	12106	334	85	2.34512	2	0.852836	0.848392	0.684696	ENSG00000137962,ENSG00000166317
CSDS	F27	12106	334	66	1.82092	2	1.09835	1.10202	0.547392	ENSG00000213949,ENSG00000139044
CSDS	F28	12106	334	173	4.77301	2	0.419023	0.408708	0.954346	ENSG00000122591,ENSG00000158486
CSDS	F31	12106	334	66	1.82092	2	1.09835	1.10202	0.547392	ENSG00000168724,ENSG00000174417
CSDS	F32	12106	334	74	2.04163	0	0	0	1
CSDS	F33	12106	334	63	1.73815	5	2.87663	3.06885	0.0296193	ENSG00000144868,ENSG00000155858,ENSG00000164619,ENSG00000123901,ENSG00000107796
CSDS	F34	12106	334	95	2.62101	3	1.1446	1.15065	0.489596	ENSG00000157093,ENSG00000140092,ENSG00000174628
CSDS	F37	12106	334	109	3.00727	3	0.997583	0.997492	0.582593	ENSG00000107186,ENSG00000148690,ENSG00000198736
CSDS	F39	12106	334	70	1.93127	1	0.517793	0.509354	0.859718	ENSG00000244187
CSDS	F40	12106	334	62	1.71056	0	0	0	1
CSDS	F41	12106	334	80	2.20717	3	1.35921	1.37652	0.380135	ENSG00000145934,ENSG00000136040,ENSG00000154975
CSDS	F42	12106	334	76	2.09681	3	1.43074	1.45243	0.349918	ENSG00000185149,ENSG00000152785,ENSG00000070882
CSDS	F43	12106	334	98	2.70378	4	1.47941	1.50578	0.28551	ENSG00000162692,ENSG00000183117,ENSG00000148600,ENSG00000183655
CSDS	F44	12106	334	58	1.6002	3	1.87477	1.93071	0.214948	ENSG00000012211,ENSG00000160957,ENSG00000159792
CSDS	F45	12106	334	72	1.98645	5	2.51705	2.65455	0.0484076	ENSG00000069702,ENSG00000197410,ENSG00000111817,ENSG00000188153,ENSG00000151067
CSDS	F46	12106	334	63	1.73815	1	0.575326	0.567199	0.829184	ENSG00000100116
CSDS	F64	12106	334	2064	56.945	89	1.56291	1.80187	5.32936e-06	ENSG00000158292,ENSG00000143013,ENSG00000182004,ENSG00000134207,ENSG00000187608,ENSG00000117643,ENSG00000117475,ENSG00000225556,ENSG00000116981,ENSG00000162878,ENSG00000150551,ENSG00000177519,ENSG00000115194,ENSG00000152056,ENSG00000162998,ENSG00000121440,ENSG00000044524,ENSG00000179097,ENSG00000164082,ENSG00000114115,ENSG00000091490,ENSG00000152784,ENSG00000173376,ENSG00000121210,ENSG00000164303…
CSDS	F65	12106	334	740	20.4163	19	0.930628	0.924508	0.661871	ENSG00000183317,ENSG00000162630,ENSG00000160678,ENSG00000023902,ENSG00000168702,ENSG00000138433,ENSG00000144229,ENSG00000114450,ENSG00000132170,ENSG00000113657,ENSG00000175471,ENSG00000170085,ENSG00000268089,ENSG00000125355,ENSG00000153714,ENSG00000262655,ENSG00000122025,ENSG00000153885,ENSG00000105048
CSDS	F66	12106	334	57	1.57261	0	0	0	1
CSDS	F81	12106	334	62	1.71056	2	1.16921	1.17589	0.513651	ENSG00000147862,ENSG00000240771
CSDS	F82	12106	334	78	2.15199	1	0.464686	0.456126	0.888005	ENSG00000168734
CSDS	F102	12106	334	88	2.42789	0	0	0	1
CSDS	F103	12106	334	91	2.51066	2	0.796605	0.790794	0.720334	ENSG00000180185,ENSG00000105559
CSDS	F105	12106	334	59	1.62779	0	0	0	1
CSDS	F107	12106	334	115	3.17281	2	0.630357	0.621566	0.830596	ENSG00000180822,ENSG00000105088
CSDS	F109	12106	334	51	1.40707	0	0	0	1
CSDS	F132	12106	334	71	1.95886	1	0.5105	0.502035	0.86361	ENSG00000104983
CSDS	F133	12106	334	115	3.17281	1	0.315178	0.307115	0.960555	ENSG00000049323
CSDS	F134	12106	334	61	1.68297	0	0	0	1
CSDS	F150	12106	334	181	4.99372	3	0.600754	0.590363	0.880207	ENSG00000176597,ENSG00000164466,ENSG00000148057
CSDS	F155	12106	334	97	2.67619	7	2.61566	2.77819	0.0176724	ENSG00000153253,ENSG00000163939,ENSG00000171159,ENSG00000139405,ENSG00000140044,ENSG00000138623,ENSG00000161647
CSDS	F156	12106	334	72	1.98645	0	0	0	1
CSDS	F159	12106	334	79	2.17958	0	0	0	1
CSDS	F168	12106	334	61	1.68297	4	2.37675	2.49076	0.087421	ENSG00000185946,ENSG00000157014,ENSG00000176018,ENSG00000166833
CSDS	F169	12106	334	69	1.90368	1	0.525297	0.516889	0.855714	ENSG00000165899
CSDS	F190	12106	334	54	1.48984	0	0	0	1
CSDS	F194	12106	334	67	1.8485	1	0.540978	0.532642	0.847362	ENSG00000101335
CSDS	F195	12106	334	250	6.89741	5	0.72491	0.715044	0.824144	ENSG00000174839,ENSG00000112514,ENSG00000153975,ENSG00000275074,ENSG00000168502
CSDS	F196	12106	334	83	2.28994	1	0.436693	0.428132	0.902717	ENSG00000154146
CSDS	F197	12106	334	81	2.23476	2	0.894951	0.89165	0.658931	ENSG00000138413,ENSG00000177374
CSDS	F198	12106	334	54	1.48984	2	1.34243	1.3577	0.441419	ENSG00000171873,ENSG00000100346
CSDS	F203	12106	334	50	1.37948	1	0.72491	0.718469	0.753834	ENSG00000187486
CSDS	F232	12106	334	118	3.25558	0	0	0	1
CSDS	F243	12106	334	87	2.4003	1	0.416615	0.40808	0.913086	ENSG00000131979
CSDS	F259	12106	334	70	1.93127	2	1.03559	1.03686	0.579464	ENSG00000163399,ENSG00000013441
CSDS	F263	12106	334	50	1.37948	3	2.17473	2.26096	0.159128	ENSG00000171819,ENSG00000135318,ENSG00000166750
CSDS	F270	12106	334	227	6.26284	3	0.479016	0.467274	0.952434	ENSG00000153046,ENSG00000203760,ENSG00000111581
CSDS	F273	12106	334	50	1.37948	0	0	0	1
CSDS	F288	12106	334	52	1.43466	0	0	0	1
CSDS	F326	12106	334	64	1.76574	2	1.13267	1.13776	0.530727	ENSG00000107186,ENSG00000148690
CSDS	F345	12106	334	51	1.40707	3	2.13209	2.21358	0.165848	ENSG00000012211,ENSG00000160957,ENSG00000159792
CSDS	F347	12106	334	60	1.65538	4	2.41637	2.53568	0.0834064	ENSG00000069702,ENSG00000111817,ENSG00000188153,ENSG00000151067
CSDS	F388	12106	334	188	5.18685	5	0.963976	0.962433	0.596013	ENSG00000044524,ENSG00000164082,ENSG00000152784,ENSG00000158813,ENSG00000227051
CSDS	F389	12106	334	467	12.8844	10	0.776135	0.764184	0.835298	ENSG00000117643,ENSG00000116981,ENSG00000162998,ENSG00000164303,ENSG00000122863,ENSG00000010626,ENSG00000139263,ENSG00000161835,ENSG00000276023,ENSG00000154856
CSDS	F391	12106	334	107	2.95209	2	0.677486	0.66938	0.799095	ENSG00000130052,ENSG00000167077
CSDS	F392	12106	334	102	2.81414	4	1.42139	1.44383	0.310406	ENSG00000115194,ENSG00000146250,ENSG00000129159,ENSG00000125869
CSDS	F394	12106	334	155	4.27639	4	0.935368	0.932857	0.623299	ENSG00000121440,ENSG00000130962,ENSG00000104549,ENSG00000135740
CSDS	F396	12106	334	85	2.34512	6	2.55851	2.70705	0.0298691	ENSG00000225556,ENSG00000076716,ENSG00000137106,ENSG00000173848,ENSG00000203485,ENSG00000187905
CSDS	F397	12106	334	83	2.28994	8	3.49354	3.82661	0.00201596	ENSG00000158292,ENSG00000121210,ENSG00000159788,ENSG00000128573,ENSG00000111249,ENSG00000103061,ENSG00000181291,ENSG00000171246
CSDS	F398	12106	334	69	1.90368	4	2.10119	2.18294	0.122723	ENSG00000112902,ENSG00000155926,ENSG00000171877,ENSG00000006283
CSDS	F399	12106	334	105	2.89691	2	0.690391	0.682494	0.790449	ENSG00000143013,ENSG00000173376
CSDS	F400	12106	334	121	3.33834	12	3.5946	3.98674	0.000126158	ENSG00000134207,ENSG00000177519,ENSG00000152056,ENSG00000091490,ENSG00000113100,ENSG00000154548,ENSG00000137573,ENSG00000008513,ENSG00000048540,ENSG00000185100,ENSG00000152910,ENSG00000176533
CSDS	F402	12106	334	56	1.54502	0	0	0	1
CSDS	F533	12106	334	76	2.09681	0	0	0	1
CSDS	F535	12106	334	51	1.40707	1	0.710696	0.70404	0.760653	ENSG00000180185
CSDS	F595	12106	334	53	1.46225	1	0.683878	0.676848	0.773733	ENSG00000104983
CSDS	F660	12106	334	76	2.09681	6	2.86149	3.05749	0.0182977	ENSG00000153253,ENSG00000171159,ENSG00000139405,ENSG00000140044,ENSG00000138623,ENSG00000161647
CSDS	F718	12106	334	61	1.68297	1	0.594189	0.586205	0.819301	ENSG00000275074
CSDS	F719	12106	334	79	2.17958	3	1.37641	1.39475	0.372604	ENSG00000174839,ENSG00000112514,ENSG00000168502
CSDS	F797	12106	334	57	1.57261	0	0	0	1
CSDS	F1035	12106	334	121	3.33834	4	1.1982	1.20744	0.429501	ENSG00000044524,ENSG00000152784,ENSG00000158813,ENSG00000227051
CSDS	F1040	12106	334	145	4.0005	2	0.499938	0.489911	0.912795	ENSG00000164303,ENSG00000276023
CSDS	F1041	12106	334	51	1.40707	0	0	0	1
CSDS	F1075	12106	334	59	1.62779	2	1.22866	1.23808	0.487281	ENSG00000130962,ENSG00000135740
CSDS	F1101	12106	334	57	1.57261	2	1.27177	1.28332	0.469215	ENSG00000143013,ENSG00000173376
CSDS	F1479	12106	334	98	2.70378	2	0.739704	0.732696	0.757568	ENSG00000164303,ENSG00000276023
CUMS	F3	12106	1535	2804	355.538	304	0.855043	0.797296	0.999684	ENSG00000171729,ENSG00000197921,ENSG00000158286,ENSG00000116133,ENSG00000171492,ENSG00000076356,ENSG00000188931,ENSG00000116874,ENSG00000160781,ENSG00000131238,ENSG00000179403,ENSG00000196517,ENSG00000169291,ENSG00000132780,ENSG00000143819,ENSG00000117616,ENSG00000143815,ENSG00000254685,ENSG00000116885,ENSG00000116898,ENSG00000213088,ENSG00000182901,ENSG00000078618,ENSG00000196189,ENSG00000163462…
CUMS	F5	12106	1535	346	43.8716	49	1.11689	1.14063	0.221556	ENSG00000177807,ENSG00000133019,ENSG00000154429,ENSG00000197056,ENSG00000010803,ENSG00000077522,ENSG00000115875,ENSG00000240857,ENSG00000115963,ENSG00000157833,ENSG00000163466,ENSG00000143933,ENSG00000178467,ENSG00000163660,ENSG00000144959,ENSG00000171109,ENSG00000250722,ENSG00000146733,ENSG00000170027,ENSG00000164548,ENSG00000183943,ENSG00000155792,ENSG00000205808,ENSG00000096968,ENSG00000110042…
CUMS	F6	12106	1535	342	43.3644	33	0.760992	0.729673	0.967148	ENSG00000009780,ENSG00000135870,ENSG00000197147,ENSG00000156875,ENSG00000197622,ENSG00000135638,ENSG00000134321,ENSG00000176732,ENSG00000198399,ENSG00000163946,ENSG00000163882,ENSG00000134851,ENSG00000174695,ENSG00000128595,ENSG00000147050,ENSG00000133878,ENSG00000136861,ENSG00000119396,ENSG00000030066,ENSG00000107537,ENSG00000135447,ENSG00000127314,ENSG00000240771,ENSG00000204842,ENSG00000174233…
CUMS	F7	12106	1535	862	109.299	104	0.951521	0.940851	0.72867	ENSG00000130766,ENSG00000143179,ENSG00000118197,ENSG00000117410,ENSG00000085831,ENSG00000189410,ENSG00000185630,ENSG00000120942,ENSG00000120948,ENSG00000162402,ENSG00000119787,ENSG00000135951,ENSG00000005448,ENSG00000169599,ENSG00000077232,ENSG00000173559,ENSG00000214694,ENSG00000063660,ENSG00000144810,ENSG00000114790,ENSG00000173889,ENSG00000071794,ENSG00000188315,ENSG00000232112,ENSG00000144647…
CUMS	F9	12106	1535	524	66.4414	63	0.948203	0.938598	0.69774	ENSG00000142892,ENSG00000117118,ENSG00000160752,ENSG00000162755,ENSG00000162426,ENSG00000160785,ENSG00000014641,ENSG00000183091,ENSG00000127838,ENSG00000135622,ENSG00000065518,ENSG00000163902,ENSG00000114491,ENSG00000155903,ENSG00000164054,ENSG00000196542,ENSG00000016864,ENSG00000152952,ENSG00000109667,ENSG00000153012,ENSG00000145781,ENSG00000112855,ENSG00000132357,ENSG00000131016,ENSG00000204681…
CUMS	F10	12106	1535	294	37.2782	44	1.18031	1.21828	0.135573	ENSG00000163866,ENSG00000073756,ENSG00000143368,ENSG00000009307,ENSG00000134323,ENSG00000164168,ENSG00000127184,ENSG00000145685,ENSG00000164466,ENSG00000146151,ENSG00000111850,ENSG00000241468,ENSG00000176428,ENSG00000187325,ENSG00000147548,ENSG00000164919,ENSG00000154188,ENSG00000107223,ENSG00000185963,ENSG00000176340,ENSG00000175376,ENSG00000172671,ENSG00000198728,ENSG00000111647,ENSG00000187778…
CUMS	F12	12106	1535	426	54.0154	56	1.03674	1.04391	0.406587	ENSG00000142655,ENSG00000135828,ENSG00000160097,ENSG00000177606,ENSG00000118194,ENSG00000069424,ENSG00000185278,ENSG00000138468,ENSG00000163584,ENSG00000186001,ENSG00000169379,ENSG00000163964,ENSG00000178177,ENSG00000109738,ENSG00000183654,ENSG00000113719,ENSG00000153922,ENSG00000204264,ENSG00000124614,ENSG00000164603,ENSG00000117868,ENSG00000080561,ENSG00000167700,ENSG00000135048,ENSG00000198680…
CUMS	F13	12106	1535	368	46.6612	50	1.07156	1.08561	0.320486	ENSG00000157193,ENSG00000132763,ENSG00000130775,ENSG00000143799,ENSG00000162576,ENSG00000153187,ENSG00000114948,ENSG00000144426,ENSG00000055917,ENSG00000175066,ENSG00000196455,ENSG00000151806,ENSG00000113552,ENSG00000145860,ENSG00000164694,ENSG00000124688,ENSG00000132424,ENSG00000146070,ENSG00000112578,ENSG00000152818,ENSG00000090263,ENSG00000153993,ENSG00000122566,ENSG00000067829,ENSG00000120500…
CUMS	F17	12106	1535	79	10.0169	7	0.698817	0.668041	0.888251	ENSG00000146463,ENSG00000178233,ENSG00000198945,ENSG00000182831,ENSG00000140694,ENSG00000177150,ENSG00000124160
CUMS	F18	12106	1535	1151	145.943	142	0.972983	0.966035	0.657587	ENSG00000121769,ENSG00000065243,ENSG00000036549,ENSG00000143458,ENSG00000143158,ENSG00000143198,ENSG00000116668,ENSG00000054282,ENSG00000242485,ENSG00000168653,ENSG00000117245,ENSG00000065135,ENSG00000170385,ENSG00000178096,ENSG00000137942,ENSG00000054116,ENSG00000272031,ENSG00000007923,ENSG00000116663,ENSG00000122432,ENSG00000122417,ENSG00000143889,ENSG00000116096,ENSG00000198612,ENSG00000136560…
CUMS	F19	12106	1535	182	23.077	20	0.866664	0.848254	0.786212	ENSG00000066557,ENSG00000117598,ENSG00000138071,ENSG00000157500,ENSG00000174748,ENSG00000130396,ENSG00000125675,ENSG00000156103,ENSG00000197958,ENSG00000110675,ENSG00000068976,ENSG00000175395,ENSG00000165650,ENSG00000108061,ENSG00000100711,ENSG00000139998,ENSG00000140382,ENSG00000166263,ENSG00000055483,ENSG00000105393
CUMS	F20	12106	1535	77	9.76334	11	1.12666	1.14881	0.384957	ENSG00000163273,ENSG00000156475,ENSG00000172594,ENSG00000196230,ENSG00000197362,ENSG00000171169,ENSG00000214753,ENSG00000183735,ENSG00000101079,ENSG00000142544,ENSG00000128245
CUMS	F21	12106	1535	54	6.84702	13	1.89864	2.19349	0.0154485	ENSG00000162396,ENSG00000128656,ENSG00000058262,ENSG00000204356,ENSG00000235863,ENSG00000122786,ENSG00000157110,ENSG00000140280,ENSG00000171262,ENSG00000087111,ENSG00000130589,ENSG00000132639,ENSG00000154639
CUMS	F22	12106	1535	299	37.9122	36	0.949563	0.941277	0.658057	ENSG00000162670,ENSG00000116962,ENSG00000142871,ENSG00000154511,ENSG00000164002,ENSG00000131781,ENSG00000196843,ENSG00000125629,ENSG00000114480,ENSG00000145050,ENSG00000168237,ENSG00000151790,ENSG00000184305,ENSG00000064692,ENSG00000170624,ENSG00000198755,ENSG00000001084,ENSG00000105810,ENSG00000232119,ENSG00000147872,ENSG00000136872,ENSG00000166741,ENSG00000170145,ENSG00000152137,ENSG00000178878…
CUMS	F23	12106	1535	295	37.405	44	1.17631	1.21331	0.140703	ENSG00000116151,ENSG00000132854,ENSG00000197965,ENSG00000143641,ENSG00000065526,ENSG00000075340,ENSG00000030419,ENSG00000013441,ENSG00000144136,ENSG00000144233,ENSG00000134115,ENSG00000127249,ENSG00000163673,ENSG00000151611,ENSG00000170469,ENSG00000001036,ENSG00000137275,ENSG00000168566,ENSG00000112365,ENSG00000106537,ENSG00000004799,ENSG00000120899,ENSG00000185585,ENSG00000176248,ENSG00000080503…
CUMS	F24	12106	1535	250	31.6992	40	1.26186	1.32005	0.0702983	ENSG00000162618,ENSG00000090621,ENSG00000171793,ENSG00000136732,ENSG00000198925,ENSG00000144152,ENSG00000169313,ENSG00000171421,ENSG00000168685,ENSG00000175449,ENSG00000164402,ENSG00000164440,ENSG00000120256,ENSG00000166997,ENSG00000106105,ENSG00000127947,ENSG00000263001,ENSG00000147408,ENSG00000149269,ENSG00000006118,ENSG00000137492,ENSG00000160695,ENSG00000110721,ENSG00000076067,ENSG00000134291…
CUMS	F25	12106	1535	186	23.5842	24	1.01763	1.02057	0.496709	ENSG00000203724,ENSG00000197121,ENSG00000185565,ENSG00000010282,ENSG00000182168,ENSG00000150627,ENSG00000145362,ENSG00000113211,ENSG00000104290,ENSG00000213930,ENSG00000187240,ENSG00000120594,ENSG00000107560,ENSG00000029153,ENSG00000167962,ENSG00000108298,ENSG00000108840,ENSG00000171451,ENSG00000178184,ENSG00000108107,ENSG00000187266,ENSG00000100354,ENSG00000185386,ENSG00000155304
CUMS	F26	12106	1535	85	10.7777	12	1.11341	1.13305	0.392016	ENSG00000137962,ENSG00000152763,ENSG00000116459,ENSG00000154518,ENSG00000115486,ENSG00000112146,ENSG00000004848,ENSG00000102100,ENSG00000173915,ENSG00000178802,ENSG00000140470,ENSG00000105401
CUMS	F27	12106	1535	66	8.36858	8	0.955957	0.949618	0.610092	ENSG00000162642,ENSG00000115902,ENSG00000168309,ENSG00000135537,ENSG00000139044,ENSG00000177108,ENSG00000167515,ENSG00000197943
CUMS	F28	12106	1535	173	21.9358	19	0.866163	0.847795	0.782399	ENSG00000163344,ENSG00000206530,ENSG00000017260,ENSG00000132405,ENSG00000213523,ENSG00000240230,ENSG00000243279,ENSG00000147586,ENSG00000172889,ENSG00000110066,ENSG00000182010,ENSG00000073614,ENSG00000169062,ENSG00000165959,ENSG00000100836,ENSG00000197912,ENSG00000161664,ENSG00000011304,ENSG00000173276
CUMS	F31	12106	1535	66	8.36858	12	1.43394	1.53447	0.124838	ENSG00000162976,ENSG00000143870,ENSG00000075426,ENSG00000112658,ENSG00000165349,ENSG00000104691,ENSG00000129158,ENSG00000149257,ENSG00000148843,ENSG00000151743,ENSG00000153879,ENSG00000128228
CUMS	F32	12106	1535	74	9.38295	7	0.746034	0.718233	0.844692	ENSG00000273274,ENSG00000111860,ENSG00000112210,ENSG00000119121,ENSG00000166439,ENSG00000175183,ENSG00000134531
CUMS	F33	12106	1535	63	7.98819	9	1.12666	1.14861	0.40542	ENSG00000164220,ENSG00000112837,ENSG00000184465,ENSG00000184831,ENSG00000110911,ENSG00000157227,ENSG00000187720,ENSG00000168675,ENSG00000130176
CUMS	F34	12106	1535	95	12.0457	9	0.747156	0.719066	0.86626	ENSG00000173540,ENSG00000163297,ENSG00000049860,ENSG00000105854,ENSG00000070159,ENSG00000107249,ENSG00000110768,ENSG00000140092,ENSG00000166073
CUMS	F37	12106	1535	109	13.8208	20	1.44709	1.55472	0.0554963	ENSG00000163155,ENSG00000143171,ENSG00000162849,ENSG00000143858,ENSG00000134317,ENSG00000175161,ENSG00000168993,ENSG00000170088,ENSG00000002549,ENSG00000006625,ENSG00000090266,ENSG00000180155,ENSG00000107186,ENSG00000182985,ENSG00000006071,ENSG00000177981,ENSG00000152944,ENSG00000166592,ENSG00000108352,ENSG00000141404
CUMS	F39	12106	1535	70	8.87576	11	1.23933	1.28597	0.269557	ENSG00000127603,ENSG00000168280,ENSG00000174473,ENSG00000106330,ENSG00000165061,ENSG00000148200,ENSG00000166025,ENSG00000198382,ENSG00000129467,ENSG00000101336,ENSG00000125810
CUMS	F40	12106	1535	62	7.86139	6	0.763224	0.736843	0.814912	ENSG00000138641,ENSG00000112186,ENSG00000150768,ENSG00000178235,ENSG00000139679,ENSG00000077942
CUMS	F41	12106	1535	80	10.1437	16	1.57733	1.72916	0.0415634	ENSG00000162694,ENSG00000170035,ENSG00000162992,ENSG00000115306,ENSG00000150712,ENSG00000168438,ENSG00000213079,ENSG00000185760,ENSG00000131089,ENSG00000149212,ENSG00000149177,ENSG00000198408,ENSG00000100490,ENSG00000172794,ENSG00000062822,ENSG00000243927
CUMS	F42	12106	1535	76	9.63654	16	1.66035	1.84511	0.0270228	ENSG00000159388,ENSG00000119041,ENSG00000138073,ENSG00000088543,ENSG00000124571,ENSG00000070882,ENSG00000001497,ENSG00000130222,ENSG00000150594,ENSG00000136155,ENSG00000170345,ENSG00000156642,ENSG00000156968,ENSG00000103496,ENSG00000101294,ENSG00000126456
CUMS	F43	12106	1535	98	12.4261	14	1.12666	1.1491	0.359258	ENSG00000180198,ENSG00000115232,ENSG00000109158,ENSG00000112981,ENSG00000111885,ENSG00000102385,ENSG00000196976,ENSG00000094914,ENSG00000139697,ENSG00000130779,ENSG00000108423,ENSG00000080573,ENSG00000090013,ENSG00000100376
CUMS	F44	12106	1535	58	7.3542	9	1.22379	1.26643	0.311479	ENSG00000116717,ENSG00000090520,ENSG00000138814,ENSG00000151834,ENSG00000077420,ENSG00000128805,ENSG00000166598,ENSG00000126803,ENSG00000179218
CUMS	F45	12106	1535	72	9.12936	9	0.985831	0.983712	0.571722	ENSG00000125945,ENSG00000162733,ENSG00000265491,ENSG00000163611,ENSG00000091136,ENSG00000188153,ENSG00000132510,ENSG00000141668,ENSG00000125844
CUMS	F46	12106	1535	63	7.98819	3	0.375555	0.343068	0.990121	ENSG00000137824,ENSG00000118680,ENSG00000100242
CUMS	F64	12106	1535	2064	261.708	220	0.840631	0.791795	0.999096	ENSG00000197921,ENSG00000116133,ENSG00000188931,ENSG00000116874,ENSG00000131238,ENSG00000179403,ENSG00000196517,ENSG00000169291,ENSG00000143819,ENSG00000117616,ENSG00000143815,ENSG00000254685,ENSG00000116885,ENSG00000213088,ENSG00000182901,ENSG00000078618,ENSG00000196189,ENSG00000186364,ENSG00000153936,ENSG00000162591,ENSG00000162981,ENSG00000143919,ENSG00000196872,ENSG00000144036,ENSG00000188542…
CUMS	F65	12106	1535	740	93.8295	84	0.895241	0.874998	0.881612	ENSG00000171729,ENSG00000158286,ENSG00000171492,ENSG00000076356,ENSG00000160781,ENSG00000132780,ENSG00000116898,ENSG00000163462,ENSG00000116455,ENSG00000159399,ENSG00000168702,ENSG00000138430,ENSG00000155636,ENSG00000153561,ENSG00000118263,ENSG00000144668,ENSG00000114450,ENSG00000183873,ENSG00000152580,ENSG00000071205,ENSG00000163453,ENSG00000151726,ENSG00000164318,ENSG00000086200,ENSG00000031003…
CUMS	F66	12106	1535	57	7.22741	8	1.1069	1.12496	0.437314	ENSG00000163466,ENSG00000143933,ENSG00000163660,ENSG00000150093,ENSG00000151923,ENSG00000100554,ENSG00000196132,ENSG00000105568
CUMS	F81	12106	1535	62	7.86139	5	0.63602	0.602819	0.908134	ENSG00000163946,ENSG00000133878,ENSG00000240771,ENSG00000167186,ENSG00000178691
CUMS	F82	12106	1535	78	9.89014	6	0.606665	0.572237	0.941715	ENSG00000156875,ENSG00000197622,ENSG00000174695,ENSG00000136861,ENSG00000135447,ENSG00000174233
CUMS	F102	12106	1535	88	11.1581	9	0.806589	0.783299	0.800803	ENSG00000120948,ENSG00000111880,ENSG00000128534,ENSG00000204116,ENSG00000147162,ENSG00000066827,ENSG00000110906,ENSG00000151176,ENSG00000141098
CUMS	F103	12106	1535	91	11.5385	9	0.779998	0.754427	0.831343	ENSG00000189410,ENSG00000071794,ENSG00000189367,ENSG00000205903,ENSG00000110172,ENSG00000120616,ENSG00000103710,ENSG00000180185,ENSG00000124134
CUMS	F105	12106	1535	59	7.481	8	1.06938	1.0807	0.477443	ENSG00000162402,ENSG00000145721,ENSG00000055609,ENSG00000184863,ENSG00000090889,ENSG00000261236,ENSG00000070018,ENSG00000130856
CUMS	F107	12106	1535	115	14.5816	12	0.822954	0.800784	0.805032	ENSG00000130766,ENSG00000112739,ENSG00000112159,ENSG00000123975,ENSG00000110711,ENSG00000110917,ENSG00000090060,ENSG00000140553,ENSG00000140995,ENSG00000011258,ENSG00000130703,ENSG00000126457
CUMS	F109	12106	1535	51	6.46663	5	0.7732	0.747743	0.791919	ENSG00000117410,ENSG00000173889,ENSG00000144647,ENSG00000136891,ENSG00000177853
CUMS	F132	12106	1535	71	9.00256	7	0.777557	0.752112	0.812581	ENSG00000162426,ENSG00000065518,ENSG00000164054,ENSG00000175895,ENSG00000111731,ENSG00000213246,ENSG00000100142
CUMS	F133	12106	1535	115	14.5816	18	1.23443	1.2812	0.202264	ENSG00000142892,ENSG00000117118,ENSG00000014641,ENSG00000127838,ENSG00000196542,ENSG00000016864,ENSG00000131016,ENSG00000120254,ENSG00000086289,ENSG00000184368,ENSG00000184524,ENSG00000168439,ENSG00000139190,ENSG00000069966,ENSG00000140575,ENSG00000170049,ENSG00000167785,ENSG00000063322
CUMS	F134	12106	1535	61	7.73459	10	1.29289	1.35258	0.239846	ENSG00000160785,ENSG00000153012,ENSG00000102144,ENSG00000180008,ENSG00000119703,ENSG00000105649,ENSG00000088247,ENSG00000131100,ENSG00000184117,ENSG00000100401
CUMS	F150	12106	1535	181	22.9502	29	1.26361	1.31991	0.108114	ENSG00000163866,ENSG00000164168,ENSG00000127184,ENSG00000145685,ENSG00000164466,ENSG00000111850,ENSG00000241468,ENSG00000176428,ENSG00000164919,ENSG00000107223,ENSG00000185963,ENSG00000176340,ENSG00000175376,ENSG00000172671,ENSG00000111647,ENSG00000187778,ENSG00000151778,ENSG00000167004,ENSG00000140691,ENSG00000174939,ENSG00000167363,ENSG00000042753,ENSG00000267855,ENSG00000198356,ENSG00000221983…
CUMS	F155	12106	1535	97	12.2993	12	0.975667	0.972014	0.582649	ENSG00000118194,ENSG00000069424,ENSG00000169379,ENSG00000153922,ENSG00000164603,ENSG00000135048,ENSG00000167771,ENSG00000161642,ENSG00000139405,ENSG00000140044,ENSG00000105711,ENSG00000250479
CUMS	F156	12106	1535	72	9.12936	11	1.2049	1.24357	0.30155	ENSG00000163584,ENSG00000186001,ENSG00000124614,ENSG00000117868,ENSG00000080561,ENSG00000167700,ENSG00000054967,ENSG00000096717,ENSG00000111775,ENSG00000103245,ENSG00000102908
CUMS	F159	12106	1535	79	10.0169	9	0.898479	0.884734	0.685294	ENSG00000142655,ENSG00000135828,ENSG00000185278,ENSG00000167566,ENSG00000184887,ENSG00000004142,ENSG00000099795,ENSG00000141933,ENSG00000198832
CUMS	F168	12106	1535	61	7.73459	4	0.517157	0.481946	0.959764	ENSG00000146070,ENSG00000151503,ENSG00000107789,ENSG00000165521
CUMS	F169	12106	1535	69	8.74897	8	0.914394	0.902649	0.661282	ENSG00000153187,ENSG00000144426,ENSG00000164694,ENSG00000124688,ENSG00000244754,ENSG00000153443,ENSG00000157106,ENSG00000054793
CUMS	F190	12106	1535	54	6.84702	4	0.584196	0.549781	0.924457	ENSG00000146463,ENSG00000178233,ENSG00000198945,ENSG00000182831
CUMS	F194	12106	1535	67	8.49537	6	0.706267	0.676128	0.868179	ENSG00000138080,ENSG00000164237,ENSG00000182287,ENSG00000119318,ENSG00000257103,ENSG00000160191
CUMS	F195	12106	1535	250	31.6992	29	0.914851	0.901808	0.725722	ENSG00000121769,ENSG00000065243,ENSG00000036549,ENSG00000143198,ENSG00000168653,ENSG00000137942,ENSG00000272031,ENSG00000007923,ENSG00000122417,ENSG00000112651,ENSG00000198937,ENSG00000204209,ENSG00000189043,ENSG00000187416,ENSG00000106263,ENSG00000005022,ENSG00000172757,ENSG00000167770,ENSG00000102531,ENSG00000182957,ENSG00000173141,ENSG00000100591,ENSG00000140367,ENSG00000103460,ENSG00000140854…
CUMS	F196	12106	1535	83	10.5241	9	0.855178	0.836635	0.7411	ENSG00000054282,ENSG00000065135,ENSG00000116096,ENSG00000082898,ENSG00000152208,ENSG00000164219,ENSG00000198707,ENSG00000151413,ENSG00000229809
CUMS	F197	12106	1535	81	10.2705	12	1.16839	1.19921	0.327874	ENSG00000116668,ENSG00000054116,ENSG00000114331,ENSG00000145423,ENSG00000122512,ENSG00000181195,ENSG00000120533,ENSG00000147854,ENSG00000171160,ENSG00000102786,ENSG00000141959,ENSG00000160285
CUMS	F198	12106	1535	54	6.84702	3	0.438147	0.403953	0.974441	ENSG00000242485,ENSG00000111696,ENSG00000105516
CUMS	F203	12106	1535	50	6.33983	7	1.10413	1.1216	0.451746	ENSG00000143158,ENSG00000128683,ENSG00000145632,ENSG00000120129,ENSG00000198576,ENSG00000169718,ENSG00000277200
CUMS	F232	12106	1535	118	14.962	14	0.935704	0.926371	0.647014	ENSG00000066557,ENSG00000117598,ENSG00000157500,ENSG00000174748,ENSG00000130396,ENSG00000125675,ENSG00000156103,ENSG00000197958,ENSG00000068976,ENSG00000175395,ENSG00000139998,ENSG00000140382,ENSG00000166263,ENSG00000105393
CUMS	F243	12106	1535	87	11.0313	14	1.26912	1.32364	0.207999	ENSG00000162670,ENSG00000142871,ENSG00000131781,ENSG00000196843,ENSG00000125629,ENSG00000168237,ENSG00000064692,ENSG00000147872,ENSG00000136872,ENSG00000178878,ENSG00000137801,ENSG00000185624,ENSG00000167216,ENSG00000124098
CUMS	F259	12106	1535	70	8.87576	11	1.23933	1.28597	0.269557	ENSG00000030419,ENSG00000013441,ENSG00000144233,ENSG00000001036,ENSG00000168566,ENSG00000106537,ENSG00000004799,ENSG00000123360,ENSG00000185352,ENSG00000158805,ENSG00000089057
CUMS	F263	12106	1535	50	6.33983	6	0.946397	0.938846	0.621455	ENSG00000143641,ENSG00000151611,ENSG00000139292,ENSG00000196876,ENSG00000166750,ENSG00000161940
CUMS	F270	12106	1535	227	28.7828	38	1.32023	1.39433	0.043423	ENSG00000162618,ENSG00000090621,ENSG00000171793,ENSG00000136732,ENSG00000198925,ENSG00000144152,ENSG00000169313,ENSG00000171421,ENSG00000168685,ENSG00000164402,ENSG00000164440,ENSG00000120256,ENSG00000166997,ENSG00000106105,ENSG00000127947,ENSG00000263001,ENSG00000147408,ENSG00000149269,ENSG00000006118,ENSG00000137492,ENSG00000160695,ENSG00000110721,ENSG00000076067,ENSG00000134291,ENSG00000027001…
CUMS	F273	12106	1535	50	6.33983	9	1.4196	1.51465	0.175974	ENSG00000203724,ENSG00000182168,ENSG00000145362,ENSG00000113211,ENSG00000213930,ENSG00000107560,ENSG00000029153,ENSG00000167962,ENSG00000108840
CUMS	F288	12106	1535	52	6.59342	6	0.909997	0.897848	0.660341	ENSG00000017260,ENSG00000132405,ENSG00000172889,ENSG00000073614,ENSG00000169062,ENSG00000100836
CUMS	F326	12106	1535	64	8.11498	14	1.7252	1.93676	0.0274269	ENSG00000163155,ENSG00000143171,ENSG00000143858,ENSG00000134317,ENSG00000168993,ENSG00000170088,ENSG00000006625,ENSG00000090266,ENSG00000180155,ENSG00000107186,ENSG00000182985,ENSG00000006071,ENSG00000152944,ENSG00000166592
CUMS	F345	12106	1535	51	6.46663	9	1.39176	1.47845	0.19128	ENSG00000116717,ENSG00000090520,ENSG00000138814,ENSG00000151834,ENSG00000077420,ENSG00000128805,ENSG00000166598,ENSG00000126803,ENSG00000179218
CUMS	F347	12106	1535	60	7.6078	6	0.788664	0.764277	0.789328	ENSG00000162733,ENSG00000265491,ENSG00000163611,ENSG00000091136,ENSG00000188153,ENSG00000141668
CUMS	F388	12106	1535	188	23.8378	17	0.713154	0.681125	0.952877	ENSG00000196189,ENSG00000153936,ENSG00000044524,ENSG00000178057,ENSG00000113812,ENSG00000164332,ENSG00000038382,ENSG00000155660,ENSG00000182667,ENSG00000119946,ENSG00000111218,ENSG00000180440,ENSG00000227051,ENSG00000230778,ENSG00000006062,ENSG00000108622,ENSG00000178342
CUMS	F389	12106	1535	467	59.214	44	0.743067	0.707989	0.989371	ENSG00000188931,ENSG00000117616,ENSG00000162981,ENSG00000196872,ENSG00000115738,ENSG00000123636,ENSG00000121964,ENSG00000175182,ENSG00000144648,ENSG00000153064,ENSG00000179387,ENSG00000273238,ENSG00000182132,ENSG00000135312,ENSG00000118432,ENSG00000198663,ENSG00000214194,ENSG00000058404,ENSG00000175305,ENSG00000050555,ENSG00000137672,ENSG00000152558,ENSG00000130592,ENSG00000110080,ENSG00000132744…
CUMS	F391	12106	1535	107	13.5672	13	0.958191	0.952001	0.609616	ENSG00000116133,ENSG00000131238,ENSG00000116885,ENSG00000162591,ENSG00000128052,ENSG00000113231,ENSG00000164828,ENSG00000257923,ENSG00000156687,ENSG00000159884,ENSG00000150764,ENSG00000188997,ENSG00000134294
CUMS	F392	12106	1535	102	12.9333	16	1.23712	1.28417	0.216957	ENSG00000143815,ENSG00000078618,ENSG00000064652,ENSG00000183826,ENSG00000055118,ENSG00000048405,ENSG00000078725,ENSG00000137720,ENSG00000135390,ENSG00000132938,ENSG00000166477,ENSG00000159753,ENSG00000161542,ENSG00000101463,ENSG00000125869,ENSG00000219438
CUMS	F394	12106	1535	155	19.6535	16	0.814105	0.790538	0.843983	ENSG00000254685,ENSG00000169744,ENSG00000171509,ENSG00000112339,ENSG00000146918,ENSG00000130962,ENSG00000104365,ENSG00000076554,ENSG00000104549,ENSG00000106688,ENSG00000072401,ENSG00000166024,ENSG00000123384,ENSG00000167548,ENSG00000173546,ENSG00000166946
CUMS	F396	12106	1535	85	10.7777	8	0.742272	0.714023	0.860307	ENSG00000213088,ENSG00000248713,ENSG00000205189,ENSG00000204381,ENSG00000136153,ENSG00000119698,ENSG00000140538,ENSG00000232859
CUMS	F397	12106	1535	83	10.5241	8	0.760159	0.733202	0.842174	ENSG00000196517,ENSG00000169291,ENSG00000170275,ENSG00000163812,ENSG00000159788,ENSG00000221838,ENSG00000111262,ENSG00000181291
CUMS	F398	12106	1535	69	8.74897	11	1.25729	1.30826	0.253987	ENSG00000143819,ENSG00000084774,ENSG00000083896,ENSG00000096060,ENSG00000146950,ENSG00000111412,ENSG00000102543,ENSG00000066629,ENSG00000126861,ENSG00000153391,ENSG00000220008
CUMS	F399	12106	1535	105	13.3136	10	0.751109	0.723124	0.87211	ENSG00000168758,ENSG00000196220,ENSG00000144559,ENSG00000197948,ENSG00000136267,ENSG00000147912,ENSG00000177830,ENSG00000122367,ENSG00000095794,ENSG00000154229
CUMS	F400	12106	1535	121	15.3424	6	0.391073	0.356809	0.998729	ENSG00000115295,ENSG00000156140,ENSG00000185985,ENSG00000155886,ENSG00000107554,ENSG00000259207
CUMS	F402	12106	1535	56	7.10061	7	0.985831	0.983733	0.57658	ENSG00000128694,ENSG00000164211,ENSG00000113758,ENSG00000107758,ENSG00000141736,ENSG00000115257,ENSG00000100320
CUMS	F533	12106	1535	76	9.63654	8	0.830173	0.809216	0.763923	ENSG00000120948,ENSG00000111880,ENSG00000128534,ENSG00000204116,ENSG00000147162,ENSG00000066827,ENSG00000110906,ENSG00000141098
CUMS	F535	12106	1535	51	6.46663	6	0.927841	0.917892	0.641214	ENSG00000189410,ENSG00000071794,ENSG00000189367,ENSG00000120616,ENSG00000180185,ENSG00000124134
CUMS	F595	12106	1535	53	6.72022	7	1.04163	1.04819	0.515598	ENSG00000162426,ENSG00000065518,ENSG00000164054,ENSG00000175895,ENSG00000111731,ENSG00000213246,ENSG00000100142
CUMS	F660	12106	1535	76	9.63654	12	1.24526	1.29351	0.251645	ENSG00000118194,ENSG00000069424,ENSG00000169379,ENSG00000153922,ENSG00000164603,ENSG00000135048,ENSG00000167771,ENSG00000161642,ENSG00000139405,ENSG00000140044,ENSG00000105711,ENSG00000250479
CUMS	F718	12106	1535	61	7.73459	9	1.1636	1.19303	0.367506	ENSG00000121769,ENSG00000065243,ENSG00000189043,ENSG00000005022,ENSG00000172757,ENSG00000167770,ENSG00000100591,ENSG00000103363,ENSG00000100362
CUMS	F719	12106	1535	79	10.0169	10	0.998309	0.998052	0.553272	ENSG00000137942,ENSG00000272031,ENSG00000007923,ENSG00000122417,ENSG00000106263,ENSG00000102531,ENSG00000173141,ENSG00000103460,ENSG00000277972,ENSG00000277791
CUMS	F797	12106	1535	57	7.22741	7	0.968535	0.963966	0.596078	ENSG00000066557,ENSG00000157500,ENSG00000174748,ENSG00000130396,ENSG00000197958,ENSG00000068976,ENSG00000139998
CUMS	F1035	12106	1535	121	15.3424	8	0.521431	0.484888	0.989813	ENSG00000044524,ENSG00000178057,ENSG00000038382,ENSG00000119946,ENSG00000111218,ENSG00000180440,ENSG00000227051,ENSG00000230778
CUMS	F1040	12106	1535	145	18.3855	8	0.435125	0.399029	0.998719	ENSG00000196872,ENSG00000123636,ENSG00000179387,ENSG00000273238,ENSG00000182132,ENSG00000135679,ENSG00000166822,ENSG00000179314
CUMS	F1041	12106	1535	51	6.46663	6	0.927841	0.917892	0.641214	ENSG00000117616,ENSG00000175182,ENSG00000058404,ENSG00000175305,ENSG00000152558,ENSG00000110080
CUMS	F1075	12106	1535	59	7.481	3	0.401016	0.367712	0.984857	ENSG00000254685,ENSG00000130962,ENSG00000167548
CUMS	F1101	12106	1535	57	7.22741	4	0.553449	0.518515	0.942088	ENSG00000196220,ENSG00000144559,ENSG00000197948,ENSG00000154229
CUMS	F1479	12106	1535	98	12.4261	5	0.40238	0.368212	0.996391	ENSG00000196872,ENSG00000273238,ENSG00000182132,ENSG00000135679,ENSG00000179314
MDD	F3	12106	1484	2804	343.725	272	0.79133	0.717048	0.999999	ENSG00000204624,ENSG00000011021,ENSG00000116954,ENSG00000188786,ENSG00000116133,ENSG00000172339,ENSG00000134253,ENSG00000143476,ENSG00000143756,ENSG00000183831,ENSG00000162630,ENSG00000130768,ENSG00000162639,ENSG00000132718,ENSG00000118733,ENSG00000173846,ENSG00000131238,ENSG00000198912,ENSG00000143479,ENSG00000160789,ENSG00000133067,ENSG00000131779,ENSG00000010165,ENSG00000117713,ENSG00000197780…
MDD	F5	12106	1484	346	42.414	41	0.966662	0.961105	0.618052	ENSG00000097046,ENSG00000116688,ENSG00000003509,ENSG00000143933,ENSG00000130508,ENSG00000155729,ENSG00000173705,ENSG00000144959,ENSG00000168038,ENSG00000164038,ENSG00000109436,ENSG00000213585,ENSG00000146733,ENSG00000157741,ENSG00000164548,ENSG00000015676,ENSG00000156486,ENSG00000137124,ENSG00000110042,ENSG00000174684,ENSG00000174080,ENSG00000136770,ENSG00000188596,ENSG00000166111,ENSG00000134874…
MDD	F6	12106	1484	342	41.9237	36	0.858703	0.838173	0.85956	ENSG00000035687,ENSG00000162520,ENSG00000171488,ENSG00000189339,ENSG00000160838,ENSG00000135625,ENSG00000163328,ENSG00000168763,ENSG00000124357,ENSG00000163006,ENSG00000115461,ENSG00000163882,ENSG00000173175,ENSG00000134982,ENSG00000132563,ENSG00000111911,ENSG00000215712,ENSG00000198719,ENSG00000164649,ENSG00000004766,ENSG00000128590,ENSG00000004059,ENSG00000147862,ENSG00000132254,ENSG00000166444…
MDD	F7	12106	1484	862	105.667	96	0.908512	0.889946	0.863965	ENSG00000130766,ENSG00000134744,ENSG00000121644,ENSG00000092969,ENSG00000163463,ENSG00000243710,ENSG00000117410,ENSG00000116750,ENSG00000137996,ENSG00000116857,ENSG00000253368,ENSG00000120942,ENSG00000159377,ENSG00000135631,ENSG00000118242,ENSG00000115368,ENSG00000115234,ENSG00000144589,ENSG00000143970,ENSG00000115520,ENSG00000164086,ENSG00000181555,ENSG00000163617,ENSG00000144647,ENSG00000198301…
MDD	F9	12106	1484	524	64.2339	94	1.4634	1.60281	7.48381e-05	ENSG00000116704,ENSG00000134375,ENSG00000156869,ENSG00000097021,ENSG00000159164,ENSG00000134684,ENSG00000133226,ENSG00000014641,ENSG00000079785,ENSG00000127824,ENSG00000183091,ENSG00000171303,ENSG00000115839,ENSG00000127838,ENSG00000163798,ENSG00000197885,ENSG00000010256,ENSG00000164054,ENSG00000161203,ENSG00000196542,ENSG00000109667,ENSG00000164032,ENSG00000164066,ENSG00000150630,ENSG00000151718…
MDD	F10	12106	1484	294	36.0396	36	0.9989	0.998715	0.530152	ENSG00000142686,ENSG00000163866,ENSG00000163568,ENSG00000266472,ENSG00000163029,ENSG00000172292,ENSG00000134318,ENSG00000176597,ENSG00000247596,ENSG00000168137,ENSG00000128045,ENSG00000168916,ENSG00000164463,ENSG00000146151,ENSG00000157778,ENSG00000180879,ENSG00000147684,ENSG00000169139,ENSG00000107611,ENSG00000151640,ENSG00000108094,ENSG00000151778,ENSG00000126804,ENSG00000140443,ENSG00000137806…
MDD	F12	12106	1484	426	52.2207	57	1.09152	1.10991	0.256594	ENSG00000162636,ENSG00000160097,ENSG00000177606,ENSG00000169641,ENSG00000058804,ENSG00000122482,ENSG00000114933,ENSG00000115828,ENSG00000115687,ENSG00000144285,ENSG00000163939,ENSG00000153558,ENSG00000186001,ENSG00000151092,ENSG00000169379,ENSG00000163964,ENSG00000178177,ENSG00000109738,ENSG00000175416,ENSG00000153922,ENSG00000124702,ENSG00000186577,ENSG00000105948,ENSG00000005483,ENSG00000180182…
MDD	F13	12106	1484	368	45.1109	62	1.37439	1.46982	0.00542185	ENSG00000135862,ENSG00000181873,ENSG00000143437,ENSG00000181754,ENSG00000117036,ENSG00000181218,ENSG00000031698,ENSG00000162576,ENSG00000153187,ENSG00000060718,ENSG00000114948,ENSG00000144567,ENSG00000068878,ENSG00000136699,ENSG00000134330,ENSG00000213672,ENSG00000163728,ENSG00000169851,ENSG00000113552,ENSG00000123213,ENSG00000145860,ENSG00000135315,ENSG00000198478,ENSG00000164694,ENSG00000213676…
MDD	F17	12106	1484	79	9.68412	8	0.826094	0.805472	0.768123	ENSG00000058453,ENSG00000164031,ENSG00000091009,ENSG00000118518,ENSG00000100813,ENSG00000174326,ENSG00000089101,ENSG00000179271
MDD	F18	12106	1484	1151	141.094	139	0.985159	0.981375	0.593276	ENSG00000121769,ENSG00000065243,ENSG00000058799,ENSG00000079335,ENSG00000143158,ENSG00000213064,ENSG00000117308,ENSG00000142657,ENSG00000156171,ENSG00000116221,ENSG00000054116,ENSG00000203666,ENSG00000117477,ENSG00000163159,ENSG00000122432,ENSG00000143816,ENSG00000182329,ENSG00000128654,ENSG00000162804,ENSG00000143952,ENSG00000115226,ENSG00000196151,ENSG00000115750,ENSG00000077044,ENSG00000003402…
MDD	F19	12106	1484	182	22.3103	19	0.851626	0.832208	0.805445	ENSG00000175087,ENSG00000203965,ENSG00000158828,ENSG00000088727,ENSG00000138769,ENSG00000134480,ENSG00000137171,ENSG00000155970,ENSG00000186638,ENSG00000175602,ENSG00000175550,ENSG00000168056,ENSG00000175395,ENSG00000171681,ENSG00000198838,ENSG00000173517,ENSG00000175267,ENSG00000055483,ENSG00000100325
MDD	F20	12106	1484	77	9.43896	15	1.58916	1.73907	0.045182	ENSG00000214021,ENSG00000138757,ENSG00000138821,ENSG00000198563,ENSG00000196230,ENSG00000272514,ENSG00000198934,ENSG00000147416,ENSG00000149575,ENSG00000087448,ENSG00000183735,ENSG00000152936,ENSG00000139970,ENSG00000184056,ENSG00000101079
MDD	F21	12106	1484	54	6.61953	5	0.755341	0.729481	0.808068	ENSG00000128656,ENSG00000204356,ENSG00000196072,ENSG00000084444,ENSG00000132639
MDD	F22	12106	1484	299	36.6526	29	0.791213	0.764195	0.931009	ENSG00000188641,ENSG00000142871,ENSG00000117595,ENSG00000144320,ENSG00000125629,ENSG00000120742,ENSG00000023330,ENSG00000144821,ENSG00000118579,ENSG00000187678,ENSG00000164690,ENSG00000196338,ENSG00000086062,ENSG00000096872,ENSG00000150773,ENSG00000151655,ENSG00000241935,ENSG00000176273,ENSG00000166228,ENSG00000139641,ENSG00000184752,ENSG00000175318,ENSG00000156858,ENSG00000129993,ENSG00000172530…
MDD	F23	12106	1484	295	36.1622	30	0.829595	0.806403	0.886563	ENSG00000162377,ENSG00000163399,ENSG00000177301,ENSG00000116922,ENSG00000065526,ENSG00000248487,ENSG00000163788,ENSG00000072832,ENSG00000197208,ENSG00000072803,ENSG00000178175,ENSG00000048544,ENSG00000146285,ENSG00000112365,ENSG00000106537,ENSG00000005020,ENSG00000157680,ENSG00000004799,ENSG00000148229,ENSG00000119397,ENSG00000155158,ENSG00000078403,ENSG00000061936,ENSG00000196876,ENSG00000152520…
MDD	F24	12106	1484	250	30.646	35	1.14208	1.16916	0.223208	ENSG00000176444,ENSG00000204859,ENSG00000143748,ENSG00000115233,ENSG00000115840,ENSG00000163132,ENSG00000175449,ENSG00000215218,ENSG00000043462,ENSG00000113456,ENSG00000150753,ENSG00000112759,ENSG00000203734,ENSG00000124782,ENSG00000166997,ENSG00000064419,ENSG00000040341,ENSG00000147419,ENSG00000168092,ENSG00000166199,ENSG00000110721,ENSG00000177084,ENSG00000027001,ENSG00000165861,ENSG00000166411…
MDD	F25	12106	1484	186	22.8006	27	1.18418	1.21942	0.1998	ENSG00000152061,ENSG00000189171,ENSG00000117523,ENSG00000134369,ENSG00000116729,ENSG00000163001,ENSG00000115419,ENSG00000134121,ENSG00000072364,ENSG00000184083,ENSG00000104522,ENSG00000123908,ENSG00000122707,ENSG00000126883,ENSG00000187240,ENSG00000155287,ENSG00000050426,ENSG00000185043,ENSG00000129255,ENSG00000141030,ENSG00000167258,ENSG00000108107,ENSG00000099785,ENSG00000142549,ENSG00000100354…
MDD	F26	12106	1484	85	10.4196	17	1.63154	1.79846	0.0274135	ENSG00000143786,ENSG00000152763,ENSG00000198892,ENSG00000116459,ENSG00000154518,ENSG00000031081,ENSG00000112146,ENSG00000096092,ENSG00000196937,ENSG00000168546,ENSG00000148090,ENSG00000110442,ENSG00000078237,ENSG00000178802,ENSG00000090861,ENSG00000103160,ENSG00000171552
MDD	F27	12106	1484	66	8.09053	7	0.865209	0.848539	0.714613	ENSG00000172031,ENSG00000153208,ENSG00000168309,ENSG00000079215,ENSG00000125354,ENSG00000110107,ENSG00000255561
MDD	F28	12106	1484	173	21.207	19	0.89593	0.881558	0.730571	ENSG00000206530,ENSG00000145354,ENSG00000164620,ENSG00000145911,ENSG00000164291,ENSG00000122557,ENSG00000187601,ENSG00000094631,ENSG00000137040,ENSG00000172889,ENSG00000091664,ENSG00000138138,ENSG00000123297,ENSG00000197653,ENSG00000126821,ENSG00000162004,ENSG00000109084,ENSG00000011304,ENSG00000172081
MDD	F31	12106	1484	66	8.09053	7	0.865209	0.848539	0.714613	ENSG00000071127,ENSG00000253873,ENSG00000253305,ENSG00000151743,ENSG00000185716,ENSG00000101222,ENSG00000167470
MDD	F32	12106	1484	74	9.0712	8	0.881912	0.866862	0.700807	ENSG00000181378,ENSG00000109270,ENSG00000118690,ENSG00000134996,ENSG00000166439,ENSG00000134531,ENSG00000122257,ENSG00000131044
MDD	F33	12106	1484	63	7.72278	7	0.906409	0.894201	0.666991	ENSG00000144182,ENSG00000155858,ENSG00000243232,ENSG00000110619,ENSG00000134899,ENSG00000092931,ENSG00000130176
MDD	F34	12106	1484	95	11.6455	12	1.03044	1.03513	0.502522	ENSG00000162852,ENSG00000240891,ENSG00000163807,ENSG00000169288,ENSG00000164512,ENSG00000197603,ENSG00000112367,ENSG00000185345,ENSG00000107249,ENSG00000106948,ENSG00000185950,ENSG00000174628
MDD	F37	12106	1484	109	13.3616	17	1.2723	1.32632	0.176817	ENSG00000143156,ENSG00000143442,ENSG00000163171,ENSG00000119185,ENSG00000004838,ENSG00000175161,ENSG00000113811,ENSG00000168993,ENSG00000198589,ENSG00000174705,ENSG00000106683,ENSG00000105819,ENSG00000180155,ENSG00000080298,ENSG00000182985,ENSG00000139117,ENSG00000102554
MDD	F39	12106	1484	70	8.58087	6	0.69923	0.669717	0.873711	ENSG00000158816,ENSG00000134986,ENSG00000135540,ENSG00000186416,ENSG00000107821,ENSG00000184277
MDD	F40	12106	1484	62	7.6002	6	0.789453	0.765964	0.787892	ENSG00000162631,ENSG00000163913,ENSG00000137364,ENSG00000104450,ENSG00000140015,ENSG00000100650
MDD	F41	12106	1484	80	9.80671	9	0.917739	0.906738	0.659633	ENSG00000162694,ENSG00000196950,ENSG00000213079,ENSG00000147481,ENSG00000149177,ENSG00000150394,ENSG00000108395,ENSG00000172794,ENSG00000132872
MDD	F42	12106	1484	76	9.31637	15	1.61007	1.76774	0.0408242	ENSG00000196182,ENSG00000088543,ENSG00000185149,ENSG00000138660,ENSG00000102390,ENSG00000001497,ENSG00000180964,ENSG00000048392,ENSG00000137700,ENSG00000180998,ENSG00000126773,ENSG00000156642,ENSG00000138587,ENSG00000103496,ENSG00000125740
MDD	F43	12106	1484	98	12.0132	10	0.832417	0.812129	0.776955	ENSG00000134376,ENSG00000114686,ENSG00000046651,ENSG00000149547,ENSG00000148481,ENSG00000130779,ENSG00000065057,ENSG00000104936,ENSG00000090013,ENSG00000100376
MDD	F44	12106	1484	58	7.10986	3	0.421949	0.389205	0.979197	ENSG00000183508,ENSG00000150051,ENSG00000180730
MDD	F45	12106	1484	72	8.82604	11	1.24631	1.29287	0.263762	ENSG00000142949,ENSG00000069702,ENSG00000186377,ENSG00000265491,ENSG00000119772,ENSG00000152932,ENSG00000102178,ENSG00000187535,ENSG00000131470,ENSG00000132510,ENSG00000206418
MDD	F46	12106	1484	63	7.72278	6	0.776922	0.752455	0.800619	ENSG00000131697,ENSG00000162430,ENSG00000006453,ENSG00000167112,ENSG00000159111,ENSG00000160188
MDD	F64	12106	1484	2064	253.013	183	0.723283	0.653694	1	ENSG00000204624,ENSG00000011021,ENSG00000116954,ENSG00000188786,ENSG00000116133,ENSG00000172339,ENSG00000134253,ENSG00000143476,ENSG00000143756,ENSG00000130768,ENSG00000162639,ENSG00000132718,ENSG00000173846,ENSG00000131238,ENSG00000198912,ENSG00000143479,ENSG00000160789,ENSG00000133067,ENSG00000131779,ENSG00000010165,ENSG00000117713,ENSG00000197780,ENSG00000099260,ENSG00000116560,ENSG00000142599…
MDD	F65	12106	1484	740	90.712	89	0.981127	0.977177	0.596332	ENSG00000183831,ENSG00000162630,ENSG00000118733,ENSG00000180488,ENSG00000134222,ENSG00000055813,ENSG00000072135,ENSG00000174453,ENSG00000162961,ENSG00000144061,ENSG00000138430,ENSG00000163170,ENSG00000135913,ENSG00000114982,ENSG00000068912,ENSG00000138069,ENSG00000163655,ENSG00000136603,ENSG00000163536,ENSG00000188582,ENSG00000205981,ENSG00000113966,ENSG00000174579,ENSG00000138668,ENSG00000113595…
MDD	F66	12106	1484	57	6.98728	13	1.86052	2.12446	0.0184898	ENSG00000003509,ENSG00000143933,ENSG00000130508,ENSG00000168038,ENSG00000109436,ENSG00000166111,ENSG00000100554,ENSG00000104142,ENSG00000175931,ENSG00000258890,ENSG00000132821,ENSG00000124140,ENSG00000070413
MDD	F81	12106	1484	62	7.6002	2	0.263151	0.237578	0.997139	ENSG00000132563,ENSG00000147862
MDD	F82	12106	1484	78	9.56154	7	0.7321	0.70431	0.857583	ENSG00000189339,ENSG00000163328,ENSG00000163006,ENSG00000198719,ENSG00000171811,ENSG00000104731,ENSG00000141232
MDD	F102	12106	1484	88	10.7874	11	1.01971	1.0227	0.521099	ENSG00000082014,ENSG00000184634,ENSG00000204116,ENSG00000134333,ENSG00000139579,ENSG00000108854,ENSG00000108654,ENSG00000101460,ENSG00000105669,ENSG00000105202,ENSG00000183597
MDD	F103	12106	1484	91	11.1551	6	0.537869	0.503262	0.973813	ENSG00000135631,ENSG00000115368,ENSG00000197043,ENSG00000185127,ENSG00000187713,ENSG00000172602
MDD	F105	12106	1484	59	7.23245	5	0.691329	0.661628	0.864796	ENSG00000138642,ENSG00000055609,ENSG00000167114,ENSG00000103591,ENSG00000134278
MDD	F107	12106	1484	115	14.0971	13	0.922173	0.911471	0.665467	ENSG00000130766,ENSG00000121644,ENSG00000163463,ENSG00000137996,ENSG00000144589,ENSG00000143970,ENSG00000164086,ENSG00000163617,ENSG00000135541,ENSG00000122335,ENSG00000175287,ENSG00000070047,ENSG00000122965
MDD	F109	12106	1484	51	6.25178	10	1.59955	1.75073	0.0878798	ENSG00000134744,ENSG00000117410,ENSG00000144647,ENSG00000175573,ENSG00000002330,ENSG00000184281,ENSG00000095564,ENSG00000175203,ENSG00000159593,ENSG00000102978
MDD	F132	12106	1484	71	8.70345	8	0.919175	0.908411	0.654872	ENSG00000164054,ENSG00000164032,ENSG00000168769,ENSG00000145390,ENSG00000146242,ENSG00000169427,ENSG00000111652,ENSG00000110955
MDD	F133	12106	1484	115	14.0971	30	2.12809	2.55761	3.7996e-05	ENSG00000097021,ENSG00000159164,ENSG00000134684,ENSG00000014641,ENSG00000079785,ENSG00000127838,ENSG00000163798,ENSG00000197885,ENSG00000010256,ENSG00000161203,ENSG00000196542,ENSG00000164066,ENSG00000113638,ENSG00000137216,ENSG00000146376,ENSG00000146701,ENSG00000086289,ENSG00000133131,ENSG00000184368,ENSG00000134014,ENSG00000184524,ENSG00000161328,ENSG00000148798,ENSG00000148660,ENSG00000151474…
MDD	F134	12106	1484	61	7.47761	19	2.54092	3.26645	7.80561e-05	ENSG00000134375,ENSG00000133226,ENSG00000127824,ENSG00000102144,ENSG00000120053,ENSG00000139112,ENSG00000111674,ENSG00000111669,ENSG00000136143,ENSG00000119703,ENSG00000165516,ENSG00000140105,ENSG00000140740,ENSG00000258947,ENSG00000152234,ENSG00000105649,ENSG00000131100,ENSG00000184117,ENSG00000100401
MDD	F150	12106	1484	181	22.1877	25	1.12675	1.14955	0.291854	ENSG00000142686,ENSG00000163866,ENSG00000163568,ENSG00000266472,ENSG00000163029,ENSG00000172292,ENSG00000176597,ENSG00000247596,ENSG00000168137,ENSG00000128045,ENSG00000168916,ENSG00000164463,ENSG00000180879,ENSG00000147684,ENSG00000151640,ENSG00000151778,ENSG00000137806,ENSG00000242173,ENSG00000167716,ENSG00000132824,ENSG00000042753,ENSG00000126267,ENSG00000127540,ENSG00000130748,ENSG00000241837
MDD	F155	12106	1484	97	11.8906	10	0.840998	0.821545	0.765932	ENSG00000162636,ENSG00000163939,ENSG00000169379,ENSG00000153922,ENSG00000029534,ENSG00000107872,ENSG00000139405,ENSG00000109103,ENSG00000129245,ENSG00000105711
MDD	F156	12106	1484	72	8.82604	12	1.35961	1.435	0.166169	ENSG00000186001,ENSG00000175416,ENSG00000124702,ENSG00000186577,ENSG00000105948,ENSG00000179091,ENSG00000107829,ENSG00000196372,ENSG00000139324,ENSG00000102908,ENSG00000108344,ENSG00000123144
MDD	F159	12106	1484	79	9.68412	8	0.826094	0.805472	0.768123	ENSG00000122482,ENSG00000115828,ENSG00000005483,ENSG00000147852,ENSG00000119383,ENSG00000100483,ENSG00000181610,ENSG00000070423
MDD	F168	12106	1484	61	7.47761	11	1.47106	1.5789	0.120978	ENSG00000143437,ENSG00000181754,ENSG00000144567,ENSG00000068878,ENSG00000163728,ENSG00000164970,ENSG00000174516,ENSG00000154096,ENSG00000107789,ENSG00000139182,ENSG00000067225
MDD	F169	12106	1484	69	8.45829	12	1.41873	1.51095	0.132873	ENSG00000181218,ENSG00000153187,ENSG00000164694,ENSG00000213676,ENSG00000102103,ENSG00000166313,ENSG00000156515,ENSG00000126214,ENSG00000063854,ENSG00000157106,ENSG00000167978,ENSG00000167815
MDD	F190	12106	1484	54	6.61953	6	0.906409	0.894273	0.663657	ENSG00000058453,ENSG00000164031,ENSG00000091009,ENSG00000100813,ENSG00000089101,ENSG00000179271
MDD	F194	12106	1484	67	8.21312	7	0.852295	0.834313	0.729422	ENSG00000135900,ENSG00000144645,ENSG00000183696,ENSG00000058335,ENSG00000140750,ENSG00000257103,ENSG00000174917
MDD	F195	12106	1484	250	30.646	37	1.20734	1.24955	0.128159	ENSG00000121769,ENSG00000065243,ENSG00000143952,ENSG00000115226,ENSG00000163714,ENSG00000109519,ENSG00000155275,ENSG00000151729,ENSG00000164190,ENSG00000113621,ENSG00000009413,ENSG00000131023,ENSG00000112514,ENSG00000102003,ENSG00000005022,ENSG00000275074,ENSG00000165724,ENSG00000197355,ENSG00000106992,ENSG00000197345,ENSG00000172757,ENSG00000151366,ENSG00000110713,ENSG00000178449,ENSG00000133858…
MDD	F196	12106	1484	83	10.1745	6	0.589712	0.555968	0.950796	ENSG00000117308,ENSG00000163159,ENSG00000180992,ENSG00000165716,ENSG00000174373,ENSG00000181991
MDD	F197	12106	1484	81	9.92929	11	1.10783	1.12567	0.40725	ENSG00000156171,ENSG00000054116,ENSG00000117477,ENSG00000112972,ENSG00000122512,ENSG00000188191,ENSG00000102218,ENSG00000186174,ENSG00000152556,ENSG00000196510,ENSG00000102786
MDD	F198	12106	1484	54	6.61953	4	0.604273	0.571481	0.911234	ENSG00000105516,ENSG00000167642,ENSG00000278195,ENSG00000040608
MDD	F203	12106	1484	50	6.12919	5	0.815768	0.794625	0.750204	ENSG00000143158,ENSG00000162804,ENSG00000120278,ENSG00000166432,ENSG00000161981
MDD	F232	12106	1484	118	14.4649	14	0.967861	0.963187	0.594503	ENSG00000203965,ENSG00000158828,ENSG00000088727,ENSG00000134480,ENSG00000137171,ENSG00000186638,ENSG00000175602,ENSG00000175550,ENSG00000168056,ENSG00000175395,ENSG00000171681,ENSG00000198838,ENSG00000173517,ENSG00000175267
MDD	F243	12106	1484	87	10.6648	7	0.656365	0.624547	0.921207	ENSG00000188641,ENSG00000142871,ENSG00000125629,ENSG00000023330,ENSG00000144821,ENSG00000241935,ENSG00000129993
MDD	F259	12106	1484	70	8.58087	8	0.932307	0.923153	0.638682	ENSG00000163399,ENSG00000163788,ENSG00000106537,ENSG00000004799,ENSG00000078403,ENSG00000152520,ENSG00000136159,ENSG00000185352
MDD	F263	12106	1484	50	6.12919	5	0.815768	0.794625	0.750204	ENSG00000177301,ENSG00000248487,ENSG00000048544,ENSG00000155158,ENSG00000196876
MDD	F270	12106	1484	227	27.8265	31	1.11404	1.13486	0.28657	ENSG00000176444,ENSG00000204859,ENSG00000143748,ENSG00000115233,ENSG00000115840,ENSG00000163132,ENSG00000215218,ENSG00000043462,ENSG00000113456,ENSG00000150753,ENSG00000112759,ENSG00000203734,ENSG00000124782,ENSG00000166997,ENSG00000064419,ENSG00000040341,ENSG00000147419,ENSG00000168092,ENSG00000166199,ENSG00000110721,ENSG00000027001,ENSG00000165861,ENSG00000166411,ENSG00000153822,ENSG00000131467…
MDD	F273	12106	1484	50	6.12919	2	0.326307	0.297308	0.988566	ENSG00000116729,ENSG00000163001
MDD	F288	12106	1484	52	6.37436	7	1.09815	1.11391	0.457494	ENSG00000145354,ENSG00000164620,ENSG00000164291,ENSG00000122557,ENSG00000094631,ENSG00000172889,ENSG00000138138
MDD	F326	12106	1484	64	7.84537	11	1.4021	1.48912	0.154679	ENSG00000143442,ENSG00000004838,ENSG00000113811,ENSG00000168993,ENSG00000174705,ENSG00000106683,ENSG00000105819,ENSG00000180155,ENSG00000080298,ENSG00000182985,ENSG00000139117
MDD	F345	12106	1484	51	6.25178	3	0.479864	0.446257	0.958406	ENSG00000183508,ENSG00000150051,ENSG00000180730
MDD	F347	12106	1484	60	7.35503	8	1.08769	1.10168	0.457463	ENSG00000142949,ENSG00000069702,ENSG00000186377,ENSG00000265491,ENSG00000119772,ENSG00000152932,ENSG00000102178,ENSG00000131470
MDD	F388	12106	1484	188	23.0458	13	0.564095	0.527598	0.994247	ENSG00000143479,ENSG00000117713,ENSG00000144306,ENSG00000157985,ENSG00000044524,ENSG00000196159,ENSG00000164332,ENSG00000007944,ENSG00000034239,ENSG00000168481,ENSG00000137842,ENSG00000167930,ENSG00000178342
MDD	F389	12106	1484	467	57.2467	31	0.541516	0.498465	0.999983	ENSG00000173846,ENSG00000198912,ENSG00000197780,ENSG00000158747,ENSG00000085832,ENSG00000115423,ENSG00000115641,ENSG00000115271,ENSG00000119812,ENSG00000172986,ENSG00000144791,ENSG00000178252,ENSG00000185305,ENSG00000137312,ENSG00000105939,ENSG00000137672,ENSG00000110318,ENSG00000122912,ENSG00000107679,ENSG00000139291,ENSG00000010626,ENSG00000139990,ENSG00000126581,ENSG00000167695,ENSG00000266074…
MDD	F391	12106	1484	107	13.1165	11	0.83864	0.818832	0.776354	ENSG00000188786,ENSG00000116133,ENSG00000172339,ENSG00000131238,ENSG00000131779,ENSG00000172554,ENSG00000125037,ENSG00000164122,ENSG00000123411,ENSG00000153982,ENSG00000258366
MDD	F392	12106	1484	102	12.5036	9	0.719795	0.690823	0.892015	ENSG00000134253,ENSG00000116560,ENSG00000182247,ENSG00000144746,ENSG00000144857,ENSG00000078725,ENSG00000156030,ENSG00000204851,ENSG00000100316
MDD	F394	12106	1484	155	19.0005	10	0.526302	0.490221	0.994199	ENSG00000130768,ENSG00000132718,ENSG00000175928,ENSG00000225526,ENSG00000171509,ENSG00000129625,ENSG00000167548,ENSG00000087301,ENSG00000173546,ENSG00000141576
MDD	F396	12106	1484	85	10.4196	3	0.287918	0.260389	0.998805	ENSG00000076716,ENSG00000125686,ENSG00000141378
MDD	F397	12106	1484	83	10.1745	11	1.08114	1.09426	0.440097	ENSG00000204624,ENSG00000143756,ENSG00000112139,ENSG00000172348,ENSG00000158321,ENSG00000178202,ENSG00000109919,ENSG00000111262,ENSG00000170113,ENSG00000140743,ENSG00000125841
MDD	F398	12106	1484	69	8.45829	7	0.827591	0.807238	0.757424	ENSG00000155926,ENSG00000149115,ENSG00000179071,ENSG00000148426,ENSG00000119979,ENSG00000072042,ENSG00000126861
MDD	F399	12106	1484	105	12.8713	3	0.233077	0.208936	0.999873	ENSG00000058091,ENSG00000111481,ENSG00000111450
MDD	F400	12106	1484	121	14.8326	14	0.943864	0.935912	0.633363	ENSG00000162639,ENSG00000116117,ENSG00000145526,ENSG00000113597,ENSG00000158301,ENSG00000104490,ENSG00000155886,ENSG00000165023,ENSG00000158555,ENSG00000162129,ENSG00000166436,ENSG00000123066,ENSG00000072657,ENSG00000173801
MDD	F402	12106	1484	56	6.8647	6	0.874037	0.85839	0.698482	ENSG00000116954,ENSG00000138378,ENSG00000164211,ENSG00000145545,ENSG00000107758,ENSG00000165572
MDD	F533	12106	1484	76	9.31637	8	0.858703	0.841259	0.729141	ENSG00000082014,ENSG00000184634,ENSG00000204116,ENSG00000134333,ENSG00000108654,ENSG00000101460,ENSG00000105669,ENSG00000105202
MDD	F535	12106	1484	51	6.25178	3	0.479864	0.446257	0.958406	ENSG00000135631,ENSG00000185127,ENSG00000172602
MDD	F595	12106	1484	53	6.49694	8	1.23135	1.27392	0.32139	ENSG00000164054,ENSG00000164032,ENSG00000168769,ENSG00000145390,ENSG00000146242,ENSG00000169427,ENSG00000111652,ENSG00000110955
MDD	F660	12106	1484	76	9.31637	8	0.858703	0.841259	0.729141	ENSG00000169379,ENSG00000153922,ENSG00000029534,ENSG00000107872,ENSG00000139405,ENSG00000109103,ENSG00000129245,ENSG00000105711
MDD	F718	12106	1484	61	7.47761	16	2.13972	2.56167	0.0022159	ENSG00000121769,ENSG00000065243,ENSG00000163714,ENSG00000102003,ENSG00000005022,ENSG00000275074,ENSG00000106992,ENSG00000197345,ENSG00000172757,ENSG00000151366,ENSG00000178449,ENSG00000133858,ENSG00000100604,ENSG00000176396,ENSG00000063176,ENSG00000100362
MDD	F719	12106	1484	79	9.68412	14	1.44567	1.54674	0.0985289	ENSG00000143952,ENSG00000115226,ENSG00000109519,ENSG00000151729,ENSG00000164190,ENSG00000113621,ENSG00000009413,ENSG00000131023,ENSG00000112514,ENSG00000277972,ENSG00000105701,ENSG00000105255,ENSG00000130540,ENSG00000159140
MDD	F797	12106	1484	57	6.98728	9	1.28806	1.34411	0.259798	ENSG00000088727,ENSG00000134480,ENSG00000175602,ENSG00000175550,ENSG00000168056,ENSG00000171681,ENSG00000198838,ENSG00000173517,ENSG00000175267
MDD	F1035	12106	1484	121	14.8326	6	0.404513	0.370921	0.998093	ENSG00000157985,ENSG00000044524,ENSG00000196159,ENSG00000007944,ENSG00000168481,ENSG00000167930
MDD	F1040	12106	1484	145	17.7747	7	0.393819	0.360073	0.999332	ENSG00000198912,ENSG00000115641,ENSG00000115271,ENSG00000119812,ENSG00000172986,ENSG00000137312,ENSG00000107679
MDD	F1041	12106	1484	51	6.25178	4	0.639818	0.608129	0.886546	ENSG00000158747,ENSG00000126581,ENSG00000266074,ENSG00000197586
MDD	F1075	12106	1484	59	7.23245	4	0.553063	0.519286	0.9419	ENSG00000175928,ENSG00000167548,ENSG00000087301,ENSG00000141576
MDD	F1101	12106	1484	57	6.98728	1	0.143117	0.127238	0.999432	ENSG00000058091
MDD	F1479	12106	1484	98	12.0132	5	0.416208	0.382763	0.994971	ENSG00000198912,ENSG00000115271,ENSG00000119812,ENSG00000137312,ENSG00000107679

## Sheet: DEG.enrichment.CSDS.module
set1_Name	set2_Name	Background	set1_size	set2_size	expected.overlap	actual.overlap	enrichment.foldchange	odds.ratio	FET_pvalue	intersects
FMT	S3	12106	339	61	1.70816	2	1.17085	1.17767	0.512938	ENSG00000168522,ENSG00000101265
FMT	S6	12106	339	227	6.3566	7	1.10122	1.10663	0.45208	ENSG00000180914,ENSG00000179796,ENSG00000113212,ENSG00000269964,ENSG00000102359,ENSG00000184867,ENSG00000181234
FMT	S8	12106	339	268	7.50471	4	0.532999	0.520277	0.945375	ENSG00000123213,ENSG00000145569,ENSG00000106524,ENSG00000136490
FMT	S9	12106	339	526	14.7294	6	0.407349	0.389729	0.997378	ENSG00000178171,ENSG00000196639,ENSG00000241127,ENSG00000222011,ENSG00000036672,ENSG00000136155
FMT	S10	12106	339	443	12.4052	12	0.967339	0.9652	0.588944	ENSG00000173905,ENSG00000163673,ENSG00000109501,ENSG00000123575,ENSG00000061337,ENSG00000196422,ENSG00000110092,ENSG00000185736,ENSG00000198270,ENSG00000276644,ENSG00000101230,ENSG00000130287
FMT	S11	12106	339	214	5.99257	7	1.16811	1.17744	0.392419	ENSG00000185305,ENSG00000135052,ENSG00000177125,ENSG00000111218,ENSG00000139990,ENSG00000104967,ENSG00000167065
FMT	S12	12106	339	1436	40.2118	34	0.845523	0.824156	0.875146	ENSG00000116731,ENSG00000138439,ENSG00000180398,ENSG00000154928,ENSG00000138496,ENSG00000157036,ENSG00000173085,ENSG00000197894,ENSG00000113387,ENSG00000188428,ENSG00000146433,ENSG00000096092,ENSG00000106070,ENSG00000120963,ENSG00000104231,ENSG00000137133,ENSG00000136870,ENSG00000174804,ENSG00000177830,ENSG00000149269,ENSG00000175104,ENSG00000165568,ENSG00000179104,ENSG00000120690,ENSG00000136167…
FMT	S14	12106	339	215	6.02057	5	0.830486	0.823863	0.723897	ENSG00000024862,ENSG00000156042,ENSG00000130037,ENSG00000256053,ENSG00000242247
FMT	S15	12106	339	307	8.59681	5	0.581611	0.568331	0.934929	ENSG00000154027,ENSG00000116741,ENSG00000161048,ENSG00000122574,ENSG00000135457
FMT	S16	12106	339	471	13.1892	4	0.303277	0.288937	0.999317	ENSG00000162706,ENSG00000170144,ENSG00000137628,ENSG00000113328
FMT	S17	12106	339	123	3.44433	1	0.290333	0.282416	0.970146	ENSG00000168394
FMT	S18	12106	339	228	6.3846	9	1.40964	1.43803	0.190406	ENSG00000162627,ENSG00000109787,ENSG00000155511,ENSG00000170632,ENSG00000091127,ENSG00000214050,ENSG00000127334,ENSG00000136153,ENSG00000186532
FMT	S19	12106	339	439	12.2932	9	0.732114	0.719057	0.871481	ENSG00000094963,ENSG00000154451,ENSG00000168811,ENSG00000172331,ENSG00000102032,ENSG00000147912,ENSG00000111615,ENSG00000011105,ENSG00000090470
FMT	S21	12106	339	297	8.31679	9	1.08215	1.087	0.452702	ENSG00000180287,ENSG00000156959,ENSG00000173402,ENSG00000204248,ENSG00000240694,ENSG00000106771,ENSG00000171435,ENSG00000108839,ENSG00000132623
FMT	S22	12106	339	302	8.4568	10	1.18248	1.19445	0.339448	ENSG00000137936,ENSG00000116918,ENSG00000186283,ENSG00000144306,ENSG00000163527,ENSG00000174145,ENSG00000102802,ENSG00000167515,ENSG00000089195,ENSG00000213965
FMT	S24	12106	339	267	7.47671	2	0.267497	0.257606	0.995858	ENSG00000025039,ENSG00000168807
FMT	S25	12106	339	155	4.34041	5	1.15196	1.15936	0.43868	ENSG00000263528,ENSG00000169855,ENSG00000180801,ENSG00000007944,ENSG00000129472
FMT	S26	12106	339	203	5.68454	7	1.23141	1.2447	0.341966	ENSG00000196975,ENSG00000144407,ENSG00000122008,ENSG00000130822,ENSG00000107959,ENSG00000100433,ENSG00000129347
FMT	S27	12106	339	240	6.72063	5	0.743977	0.734629	0.806683	ENSG00000153237,ENSG00000157856,ENSG00000129187,ENSG00000056277,ENSG00000213928
FMT	S28	12106	339	71	1.98819	2	1.00594	1.00615	0.595388	ENSG00000161217,ENSG00000152558
FMT	S29	12106	339	164	4.59243	6	1.3065	1.32383	0.311395	ENSG00000229453,ENSG00000163520,ENSG00000158163,ENSG00000172426,ENSG00000103154,ENSG00000272636
FMT	S31	12106	339	65	1.82017	5	2.74699	2.92044	0.0351771	ENSG00000196872,ENSG00000183166,ENSG00000137672,ENSG00000185532,ENSG00000161298
FMT	S32	12106	339	88	2.46423	3	1.21742	1.22708	0.449096	ENSG00000164187,ENSG00000103876,ENSG00000178502
FMT	S37	12106	339	66	1.84817	1	0.541074	0.532654	0.847359	ENSG00000164638
FMT	S56	12106	339	69	1.93218	2	1.0351	1.03637	0.579766	ENSG00000184867,ENSG00000181234
FMT	S69	12106	339	70	1.96019	0	0	0	1
FMT	S70	12106	339	98	2.74426	1	0.364397	0.355964	0.938872	ENSG00000145569
FMT	S76	12106	339	161	4.50843	1	0.221807	0.214641	0.989985	ENSG00000241127
FMT	S77	12106	339	107	2.99628	0	0	0	1
FMT	S79	12106	339	55	1.54015	3	1.94787	2.01134	0.199317	ENSG00000178171,ENSG00000222011,ENSG00000136155
FMT	S91	12106	339	220	6.16058	5	0.811612	0.804356	0.742246	ENSG00000163673,ENSG00000109501,ENSG00000110092,ENSG00000198270,ENSG00000130287
FMT	S92	12106	339	88	2.46423	2	0.811612	0.806099	0.710744	ENSG00000196422,ENSG00000276644
FMT	S93	12106	339	54	1.51214	3	1.98394	2.05093	0.192133	ENSG00000173905,ENSG00000061337,ENSG00000185736
FMT	S98	12106	339	110	3.08029	4	1.29858	1.31351	0.371045	ENSG00000135052,ENSG00000177125,ENSG00000104967,ENSG00000167065
FMT	S102	12106	339	87	2.43623	2	0.820941	0.815651	0.704797	ENSG00000173085,ENSG00000137133
FMT	S103	12106	339	297	8.31679	7	0.841671	0.83444	0.730688	ENSG00000154928,ENSG00000157036,ENSG00000120963,ENSG00000174804,ENSG00000179104,ENSG00000141560,ENSG00000173821
FMT	S106	12106	339	269	7.53271	4	0.531017	0.518269	0.946411	ENSG00000197894,ENSG00000113387,ENSG00000121073,ENSG00000149600
FMT	S107	12106	339	158	4.42442	6	1.35611	1.37678	0.282126	ENSG00000138439,ENSG00000180398,ENSG00000146433,ENSG00000165568,ENSG00000126351,ENSG00000085415
FMT	S108	12106	339	88	2.46423	3	1.21742	1.22708	0.449096	ENSG00000116731,ENSG00000106070,ENSG00000175104
FMT	S109	12106	339	74	2.0722	2	0.96516	0.963982	0.618001	ENSG00000177830,ENSG00000188266
FMT	S110	12106	339	74	2.0722	0	0	0	1
FMT	S111	12106	339	70	1.96019	0	0	0	1
FMT	S132	12106	339	54	1.51214	2	1.32263	1.33698	0.449019	ENSG00000024862,ENSG00000256053
FMT	S133	12106	339	92	2.57624	1	0.388162	0.379628	0.927416	ENSG00000242247
FMT	S136	12106	339	91	2.54824	1	0.392428	0.383879	0.925309	ENSG00000116741
FMT	S137	12106	339	60	1.68016	1	0.595182	0.587121	0.818837	ENSG00000161048
FMT	S138	12106	339	54	1.51214	2	1.32263	1.33698	0.449019	ENSG00000154027,ENSG00000135457
FMT	S147	12106	339	110	3.08029	2	0.649289	0.640692	0.818015	ENSG00000162706,ENSG00000170144
FMT	S148	12106	339	304	8.5128	2	0.23494	0.225318	0.99841	ENSG00000137628,ENSG00000113328
FMT	S160	12106	339	164	4.59243	5	1.08875	1.09289	0.487658	ENSG00000109787,ENSG00000155511,ENSG00000170632,ENSG00000127334,ENSG00000136153
FMT	S163	12106	339	75	2.1002	0	0	0	1
FMT	S192	12106	339	216	6.04857	6	0.99197	0.991592	0.565952	ENSG00000180287,ENSG00000156959,ENSG00000173402,ENSG00000240694,ENSG00000106771,ENSG00000171435
FMT	S222	12106	339	207	5.79655	2	0.345033	0.334737	0.981216	ENSG00000025039,ENSG00000168807
FMT	S224	12106	339	70	1.96019	3	1.53047	1.55907	0.312321	ENSG00000263528,ENSG00000180801,ENSG00000129472
FMT	S225	12106	339	52	1.45614	1	0.686748	0.679678	0.77238	ENSG00000169855
FMT	S228	12106	339	105	2.94028	3	1.02031	1.0211	0.567272	ENSG00000196975,ENSG00000130822,ENSG00000129347
FMT	S230	12106	339	51	1.42813	2	1.40043	1.41917	0.420212	ENSG00000153237,ENSG00000157856
FMT	S246	12106	339	114	3.1923	6	1.87952	1.94497	0.100626	ENSG00000229453,ENSG00000163520,ENSG00000158163,ENSG00000172426,ENSG00000103154,ENSG00000272636
FMT	S279	12106	339	53	1.48414	1	0.673791	0.666551	0.778782	ENSG00000184867
FMT	S290	12106	339	55	1.54015	0	0	0	1
FMT	S313	12106	339	68	1.90418	0	0	0	1
FMT	S347	12106	339	112	3.1363	1	0.318847	0.310696	0.959072	ENSG00000130287
FMT	S378	12106	339	61	1.70816	2	1.17085	1.17767	0.512938	ENSG00000173085,ENSG00000137133
FMT	S383	12106	339	89	2.49224	2	0.802492	0.796765	0.71659	ENSG00000120963,ENSG00000179104
FMT	S401	12106	339	154	4.31241	1	0.231889	0.224596	0.98775	ENSG00000197894
FMT	S612	12106	339	104	2.91227	0	0	0	1
FMT	S749	12106	339	65	1.82017	0	0	0	1
FMT	S787	12106	339	54	1.51214	1	0.661313	0.653919	0.785004	ENSG00000120963
FMT	S803	12106	339	67	1.87618	1	0.532999	0.524539	0.851657	ENSG00000197894
CSDS	S3	12106	334	61	1.68297	2	1.18838	1.19592	0.50496	ENSG00000057019,ENSG00000028277
CSDS	S6	12106	334	227	6.26284	1	0.159672	0.153416	0.998358	ENSG00000153975
CSDS	S8	12106	334	268	7.39402	14	1.89342	1.98375	0.0167738	ENSG00000137962,ENSG00000162630,ENSG00000150551,ENSG00000185149,ENSG00000145242,ENSG00000164167,ENSG00000196376,ENSG00000107186,ENSG00000170743,ENSG00000175352,ENSG00000136040,ENSG00000089250,ENSG00000183655,ENSG00000171451
CSDS	S9	12106	334	526	14.5121	14	0.964709	0.962161	0.594254	ENSG00000050628,ENSG00000168702,ENSG00000115194,ENSG00000163939,ENSG00000109189,ENSG00000113100,ENSG00000131711,ENSG00000113657,ENSG00000175471,ENSG00000198846,ENSG00000184575,ENSG00000072041,ENSG00000005810,ENSG00000172264
CSDS	S10	12106	334	443	12.2222	1	0.0818183	0.0770094	0.999997	ENSG00000162692
CSDS	S11	12106	334	214	5.90418	0	0	0	1
CSDS	S12	12106	334	1436	39.6187	17	0.42909	0.391288	0.999994	ENSG00000162734,ENSG00000180875,ENSG00000117475,ENSG00000138413,ENSG00000013441,ENSG00000174839,ENSG00000112902,ENSG00000176018,ENSG00000137273,ENSG00000146221,ENSG00000164597,ENSG00000104549,ENSG00000130653,ENSG00000147862,ENSG00000140092,ENSG00000205336,ENSG00000101624
CSDS	S14	12106	334	215	5.93177	4	0.674335	0.664154	0.848765	ENSG00000106080,ENSG00000235453,ENSG00000181045,ENSG00000154645
CSDS	S15	12106	334	307	8.47001	3	0.354191	0.341926	0.991733	ENSG00000144476,ENSG00000268089,ENSG00000171246
CSDS	S16	12106	334	471	12.9947	1	0.0769544	0.0722431	0.999999	ENSG00000133794
CSDS	S17	12106	334	123	3.39352	6	1.76807	1.82202	0.12474	ENSG00000126091,ENSG00000145014,ENSG00000091490,ENSG00000147606,ENSG00000153714,ENSG00000158486
CSDS	S18	12106	334	228	6.29043	15	2.38457	2.55151	0.00165776	ENSG00000116981,ENSG00000084093,ENSG00000164466,ENSG00000111817,ENSG00000105866,ENSG00000180354,ENSG00000087842,ENSG00000125355,ENSG00000154134,ENSG00000111554,ENSG00000122025,ENSG00000168502,ENSG00000166619,ENSG00000101391,ENSG00000198046
CSDS	S19	12106	334	439	12.1118	1	0.0825638	0.07774	0.999996	ENSG00000135002
CSDS	S21	12106	334	297	8.19412	6	0.732233	0.721725	0.833033	ENSG00000179097,ENSG00000156990,ENSG00000170624,ENSG00000183117,ENSG00000100578,ENSG00000173404
CSDS	S22	12106	334	302	8.33207	4	0.480073	0.466728	0.969386	ENSG00000153046,ENSG00000123901,ENSG00000148690,ENSG00000198056
CSDS	S24	12106	334	267	7.36643	1	0.135751	0.129885	0.999476	ENSG00000177692
CSDS	S25	12106	334	155	4.27639	1	0.233842	0.226566	0.987282	ENSG00000086300
CSDS	S26	12106	334	203	5.60069	9	1.60694	1.65259	0.109584	ENSG00000134207,ENSG00000138433,ENSG00000204767,ENSG00000170085,ENSG00000146374,ENSG00000135334,ENSG00000164823,ENSG00000102755,ENSG00000196867
CSDS	S27	12106	334	240	6.62151	2	0.302046	0.291959	0.99099	ENSG00000163072,ENSG00000131979
CSDS	S28	12106	334	71	1.95886	4	2.042	2.11737	0.132374	ENSG00000163430,ENSG00000172403,ENSG00000145623,ENSG00000100116
CSDS	S29	12106	334	164	4.5247	8	1.76807	1.82726	0.0843319	ENSG00000157851,ENSG00000177519,ENSG00000122591,ENSG00000137573,ENSG00000137726,ENSG00000111581,ENSG00000048540,ENSG00000177374
CSDS	S31	12106	334	65	1.79333	13	7.2491	9.12285	1.91621e-08	ENSG00000163875,ENSG00000198216,ENSG00000138653,ENSG00000152785,ENSG00000159788,ENSG00000112562,ENSG00000091831,ENSG00000147655,ENSG00000148600,ENSG00000151067,ENSG00000103275,ENSG00000181291,ENSG00000185838
CSDS	S32	12106	334	88	2.42789	0	0	0	1
CSDS	S37	12106	334	66	1.82092	0	0	0	1
CSDS	S56	12106	334	69	1.90368	0	0	0	1
CSDS	S69	12106	334	70	1.93127	10	5.17793	6.02251	2.03678e-05	ENSG00000162630,ENSG00000150551,ENSG00000185149,ENSG00000145242,ENSG00000196376,ENSG00000107186,ENSG00000175352,ENSG00000136040,ENSG00000089250,ENSG00000171451
CSDS	S70	12106	334	98	2.70378	1	0.369852	0.361463	0.936263	ENSG00000164167
CSDS	S76	12106	334	161	4.44193	2	0.450255	0.440007	0.939587	ENSG00000168702,ENSG00000115194
CSDS	S77	12106	334	107	2.95209	1	0.338743	0.330519	0.950558	ENSG00000131711
CSDS	S79	12106	334	55	1.51743	9	5.93108	7.05549	1.72696e-05	ENSG00000050628,ENSG00000163939,ENSG00000109189,ENSG00000113657,ENSG00000175471,ENSG00000198846,ENSG00000184575,ENSG00000072041,ENSG00000172264
CSDS	S91	12106	334	220	6.06972	1	0.164752	0.158417	0.997995	ENSG00000162692
CSDS	S92	12106	334	88	2.42789	0	0	0	1
CSDS	S93	12106	334	54	1.48984	0	0	0	1
CSDS	S98	12106	334	110	3.03486	0	0	0	1
CSDS	S102	12106	334	87	2.4003	0	0	0	1
CSDS	S103	12106	334	297	8.19412	4	0.488155	0.4749	0.966222	ENSG00000180875,ENSG00000174839,ENSG00000176018,ENSG00000147862
CSDS	S106	12106	334	269	7.42161	1	0.134742	0.128893	0.999505	ENSG00000140092
CSDS	S107	12106	334	158	4.35916	2	0.458804	0.448584	0.935244	ENSG00000162734,ENSG00000205336
CSDS	S108	12106	334	88	2.42789	0	0	0	1
CSDS	S109	12106	334	74	2.04163	0	0	0	1
CSDS	S110	12106	334	74	2.04163	1	0.489804	0.481283	0.874655	ENSG00000137273
CSDS	S111	12106	334	70	1.93127	0	0	0	1
CSDS	S132	12106	334	54	1.48984	1	0.671213	0.664021	0.780003	ENSG00000106080
CSDS	S133	12106	334	92	2.53825	0	0	0	1
CSDS	S136	12106	334	91	2.51066	1	0.398302	0.38981	0.922353	ENSG00000268089
CSDS	S137	12106	334	60	1.65538	1	0.604092	0.596191	0.814148	ENSG00000144476
CSDS	S138	12106	334	54	1.48984	0	0	0	1
CSDS	S147	12106	334	110	3.03486	0	0	0	1
CSDS	S148	12106	334	304	8.38725	1	0.119229	0.113651	0.999819	ENSG00000133794
CSDS	S160	12106	334	164	4.5247	14	3.09413	3.38912	0.000178199	ENSG00000116981,ENSG00000084093,ENSG00000164466,ENSG00000111817,ENSG00000105866,ENSG00000180354,ENSG00000087842,ENSG00000125355,ENSG00000154134,ENSG00000111554,ENSG00000122025,ENSG00000168502,ENSG00000166619,ENSG00000198046
CSDS	S163	12106	334	75	2.06922	0	0	0	1
CSDS	S192	12106	334	216	5.95936	1	0.167803	0.161421	0.997753	ENSG00000173404
CSDS	S222	12106	334	207	5.71105	0	0	0	1
CSDS	S224	12106	334	70	1.93127	1	0.517793	0.509354	0.859718	ENSG00000086300
CSDS	S225	12106	334	52	1.43466	0	0	0	1
CSDS	S228	12106	334	105	2.89691	3	1.03559	1.03698	0.557119	ENSG00000138433,ENSG00000135334,ENSG00000102755
CSDS	S230	12106	334	51	1.40707	0	0	0	1
CSDS	S246	12106	334	114	3.14522	4	1.27177	1.28504	0.385833	ENSG00000122591,ENSG00000137726,ENSG00000048540,ENSG00000177374
CSDS	S279	12106	334	53	1.46225	0	0	0	1
CSDS	S290	12106	334	55	1.51743	10	6.59009	8.04008	2.16706e-06	ENSG00000162630,ENSG00000150551,ENSG00000185149,ENSG00000145242,ENSG00000196376,ENSG00000107186,ENSG00000175352,ENSG00000136040,ENSG00000089250,ENSG00000171451
CSDS	S313	12106	334	68	1.87609	0	0	0	1
CSDS	S347	12106	334	112	3.09004	0	0	0	1
CSDS	S378	12106	334	61	1.68297	0	0	0	1
CSDS	S383	12106	334	89	2.45548	0	0	0	1
CSDS	S401	12106	334	154	4.2488	0	0	0	1
CSDS	S612	12106	334	104	2.86932	0	0	0	1
CSDS	S749	12106	334	65	1.79333	0	0	0	1
CSDS	S787	12106	334	54	1.48984	0	0	0	1
CSDS	S803	12106	334	67	1.8485	0	0	0	1
CUMS	S3	12106	1535	61	7.73459	5	0.646446	0.613642	0.900617	ENSG00000116151,ENSG00000143632,ENSG00000120942,ENSG00000029153,ENSG00000121060
CUMS	S6	12106	1535	227	28.7828	34	1.18126	1.21799	0.170319	ENSG00000150540,ENSG00000118263,ENSG00000144668,ENSG00000163376,ENSG00000174738,ENSG00000114520,ENSG00000157500,ENSG00000173889,ENSG00000071794,ENSG00000163946,ENSG00000077684,ENSG00000134851,ENSG00000197712,ENSG00000170469,ENSG00000112685,ENSG00000146151,ENSG00000080561,ENSG00000125962,ENSG00000166025,ENSG00000149289,ENSG00000170242,ENSG00000198561,ENSG00000111647,ENSG00000123384,ENSG00000134531…
CUMS	S8	12106	1535	268	33.9815	33	0.971117	0.966337	0.600384	ENSG00000146463,ENSG00000142892,ENSG00000137962,ENSG00000170385,ENSG00000197622,ENSG00000065526,ENSG00000119787,ENSG00000076003,ENSG00000134313,ENSG00000198399,ENSG00000163660,ENSG00000071205,ENSG00000179387,ENSG00000184305,ENSG00000106524,ENSG00000070669,ENSG00000205189,ENSG00000086102,ENSG00000106868,ENSG00000107186,ENSG00000110066,ENSG00000062282,ENSG00000107789,ENSG00000107938,ENSG00000096717…
CUMS	S9	12106	1535	526	66.695	65	0.974585	0.969719	0.610281	ENSG00000036549,ENSG00000132763,ENSG00000133019,ENSG00000131238,ENSG00000117245,ENSG00000197147,ENSG00000186364,ENSG00000116455,ENSG00000143889,ENSG00000168702,ENSG00000144426,ENSG00000003402,ENSG00000115295,ENSG00000138468,ENSG00000169313,ENSG00000114098,ENSG00000182168,ENSG00000151790,ENSG00000145362,ENSG00000124275,ENSG00000113649,ENSG00000152359,ENSG00000111885,ENSG00000198945,ENSG00000096060…
CUMS	S10	12106	1535	443	56.1709	56	0.996957	0.996385	0.532238	ENSG00000076356,ENSG00000077254,ENSG00000185278,ENSG00000185630,ENSG00000003393,ENSG00000198380,ENSG00000145191,ENSG00000017260,ENSG00000163673,ENSG00000132405,ENSG00000178177,ENSG00000188848,ENSG00000151726,ENSG00000049860,ENSG00000174695,ENSG00000145715,ENSG00000168566,ENSG00000156564,ENSG00000048405,ENSG00000176595,ENSG00000147316,ENSG00000119318,ENSG00000096968,ENSG00000119396,ENSG00000110367…
CUMS	S11	12106	1535	214	27.1345	39	1.43729	1.54861	0.011863	ENSG00000157193,ENSG00000172456,ENSG00000123472,ENSG00000162981,ENSG00000114948,ENSG00000077232,ENSG00000116005,ENSG00000115310,ENSG00000055917,ENSG00000154174,ENSG00000144959,ENSG00000198836,ENSG00000196220,ENSG00000109158,ENSG00000174473,ENSG00000164588,ENSG00000022355,ENSG00000113594,ENSG00000158985,ENSG00000145920,ENSG00000111860,ENSG00000146373,ENSG00000112242,ENSG00000146950,ENSG00000165775…
CUMS	S12	12106	1535	1436	182.08	183	1.00505	1.00657	0.482656	ENSG00000273274,ENSG00000065243,ENSG00000116774,ENSG00000143179,ENSG00000118197,ENSG00000066557,ENSG00000162734,ENSG00000117118,ENSG00000142871,ENSG00000009780,ENSG00000090621,ENSG00000177606,ENSG00000162755,ENSG00000169291,ENSG00000178096,ENSG00000116885,ENSG00000116898,ENSG00000116350,ENSG00000163344,ENSG00000078618,ENSG00000127603,ENSG00000009307,ENSG00000116701,ENSG00000116717,ENSG00000120948…
CUMS	S14	12106	1535	215	27.2613	28	1.0271	1.03174	0.470429	ENSG00000066056,ENSG00000143815,ENSG00000142798,ENSG00000007923,ENSG00000077522,ENSG00000196843,ENSG00000114331,ENSG00000163297,ENSG00000153113,ENSG00000112981,ENSG00000112837,ENSG00000124688,ENSG00000106080,ENSG00000183943,ENSG00000102100,ENSG00000243279,ENSG00000120156,ENSG00000030066,ENSG00000203867,ENSG00000182010,ENSG00000120616,ENSG00000130037,ENSG00000100567,ENSG00000178802,ENSG00000140694…
CUMS	S15	12106	1535	307	38.9266	41	1.05327	1.06317	0.385047	ENSG00000143799,ENSG00000117616,ENSG00000137942,ENSG00000154429,ENSG00000254685,ENSG00000162616,ENSG00000115875,ENSG00000169282,ENSG00000151834,ENSG00000168685,ENSG00000164434,ENSG00000122507,ENSG00000170027,ENSG00000164631,ENSG00000268089,ENSG00000120899,ENSG00000147548,ENSG00000106688,ENSG00000160401,ENSG00000134910,ENSG00000068976,ENSG00000239306,ENSG00000122877,ENSG00000253719,ENSG00000177889…
CUMS	S16	12106	1535	471	59.7212	69	1.15537	1.19057	0.108917	ENSG00000130766,ENSG00000162396,ENSG00000116133,ENSG00000075945,ENSG00000177807,ENSG00000162670,ENSG00000182901,ENSG00000153936,ENSG00000117598,ENSG00000265491,ENSG00000122417,ENSG00000171853,ENSG00000221823,ENSG00000144362,ENSG00000143933,ENSG00000115306,ENSG00000138071,ENSG00000114790,ENSG00000114279,ENSG00000070087,ENSG00000153064,ENSG00000109738,ENSG00000145721,ENSG00000156475,ENSG00000198780…
CUMS	S17	12106	1535	123	15.596	19	1.21826	1.26135	0.210748	ENSG00000143158,ENSG00000242485,ENSG00000130414,ENSG00000145247,ENSG00000175449,ENSG00000174132,ENSG00000168438,ENSG00000135333,ENSG00000196636,ENSG00000184831,ENSG00000126733,ENSG00000102225,ENSG00000165637,ENSG00000151849,ENSG00000100554,ENSG00000140280,ENSG00000128245,ENSG00000219438,ENSG00000128285
CUMS	S18	12106	1535	228	28.9096	25	0.864764	0.845619	0.810898	ENSG00000197121,ENSG00000090989,ENSG00000084093,ENSG00000164466,ENSG00000039139,ENSG00000198755,ENSG00000180354,ENSG00000122512,ENSG00000136999,ENSG00000136891,ENSG00000160695,ENSG00000165832,ENSG00000151948,ENSG00000177575,ENSG00000182957,ENSG00000122025,ENSG00000136153,ENSG00000165959,ENSG00000176903,ENSG00000166822,ENSG00000162065,ENSG00000103319,ENSG00000005100,ENSG00000125775,ENSG00000198743
CUMS	S19	12106	1535	439	55.6637	58	1.04197	1.05027	0.388256	ENSG00000162618,ENSG00000154451,ENSG00000069424,ENSG00000196482,ENSG00000131781,ENSG00000136732,ENSG00000144036,ENSG00000128683,ENSG00000153561,ENSG00000115902,ENSG00000153012,ENSG00000153130,ENSG00000248713,ENSG00000174780,ENSG00000145632,ENSG00000164220,ENSG00000113231,ENSG00000038382,ENSG00000178233,ENSG00000111880,ENSG00000135537,ENSG00000120256,ENSG00000111850,ENSG00000146729,ENSG00000164603…
CUMS	S21	12106	1535	297	37.6586	34	0.902848	0.887783	0.765641	ENSG00000160785,ENSG00000182134,ENSG00000075340,ENSG00000135638,ENSG00000144218,ENSG00000010282,ENSG00000155903,ENSG00000132466,ENSG00000152208,ENSG00000185477,ENSG00000138792,ENSG00000197860,ENSG00000170624,ENSG00000147050,ENSG00000156687,ENSG00000156103,ENSG00000048649,ENSG00000196233,ENSG00000165449,ENSG00000108018,ENSG00000133687,ENSG00000151835,ENSG00000168952,ENSG00000140538,ENSG00000108599…
CUMS	S22	12106	1535	302	38.2926	55	1.43631	1.55322	0.00330208	ENSG00000171492,ENSG00000162694,ENSG00000143819,ENSG00000272031,ENSG00000164002,ENSG00000116459,ENSG00000171793,ENSG00000240857,ENSG00000198612,ENSG00000170035,ENSG00000163466,ENSG00000176732,ENSG00000128656,ENSG00000175182,ENSG00000163947,ENSG00000174145,ENSG00000138794,ENSG00000151247,ENSG00000150712,ENSG00000145781,ENSG00000182132,ENSG00000113719,ENSG00000038274,ENSG00000132357,ENSG00000153922…
CUMS	S24	12106	1535	267	33.8547	36	1.06337	1.07502	0.372241	ENSG00000143641,ENSG00000135870,ENSG00000162733,ENSG00000119041,ENSG00000175066,ENSG00000163577,ENSG00000138641,ENSG00000164219,ENSG00000145864,ENSG00000050748,ENSG00000031003,ENSG00000172594,ENSG00000112146,ENSG00000111961,ENSG00000105854,ENSG00000136267,ENSG00000131089,ENSG00000067992,ENSG00000102053,ENSG00000155792,ENSG00000205002,ENSG00000137492,ENSG00000183715,ENSG00000166439,ENSG00000166006…
CUMS	S25	12106	1535	155	19.6535	28	1.42468	1.52788	0.0327316	ENSG00000162849,ENSG00000116874,ENSG00000154511,ENSG00000153187,ENSG00000162989,ENSG00000144278,ENSG00000173166,ENSG00000115232,ENSG00000121964,ENSG00000144674,ENSG00000145860,ENSG00000183826,ENSG00000135312,ENSG00000124571,ENSG00000118432,ENSG00000130396,ENSG00000127995,ENSG00000179542,ENSG00000165061,ENSG00000129295,ENSG00000137055,ENSG00000196968,ENSG00000136754,ENSG00000129521,ENSG00000177108…
CUMS	S26	12106	1535	203	25.7397	28	1.08781	1.10378	0.345953	ENSG00000115414,ENSG00000173559,ENSG00000155636,ENSG00000186001,ENSG00000144647,ENSG00000113552,ENSG00000178394,ENSG00000112159,ENSG00000176248,ENSG00000148300,ENSG00000129158,ENSG00000102755,ENSG00000100433,ENSG00000137824,ENSG00000103811,ENSG00000104064,ENSG00000179776,ENSG00000074370,ENSG00000167216,ENSG00000125845,ENSG00000101294,ENSG00000196132,ENSG00000011304,ENSG00000161888,ENSG00000100347…
CUMS	S27	12106	1535	240	30.4312	24	0.788664	0.761469	0.916417	ENSG00000135828,ENSG00000132780,ENSG00000168758,ENSG00000138080,ENSG00000144136,ENSG00000144233,ENSG00000144559,ENSG00000183654,ENSG00000182287,ENSG00000165349,ENSG00000104365,ENSG00000020181,ENSG00000050555,ENSG00000151923,ENSG00000120833,ENSG00000111641,ENSG00000102710,ENSG00000103710,ENSG00000197912,ENSG00000011258,ENSG00000182963,ENSG00000273559,ENSG00000125885,ENSG00000123146
CUMS	S28	12106	1535	71	9.00256	8	0.888636	0.873818	0.693089	ENSG00000065135,ENSG00000204498,ENSG00000152818,ENSG00000128602,ENSG00000078596,ENSG00000175895,ENSG00000152558,ENSG00000152137
CUMS	S29	12106	1535	164	20.7946	26	1.25032	1.30258	0.134159	ENSG00000171729,ENSG00000143458,ENSG00000116663,ENSG00000063660,ENSG00000206530,ENSG00000114770,ENSG00000163520,ENSG00000152952,ENSG00000112855,ENSG00000095015,ENSG00000164694,ENSG00000132424,ENSG00000105810,ENSG00000054967,ENSG00000149256,ENSG00000137726,ENSG00000130640,ENSG00000151743,ENSG00000134294,ENSG00000123095,ENSG00000170776,ENSG00000103335,ENSG00000205937,ENSG00000100206,ENSG00000100201…
CUMS	S31	12106	1535	65	8.24178	13	1.57733	1.72773	0.0620546	ENSG00000130775,ENSG00000162402,ENSG00000196872,ENSG00000185565,ENSG00000138653,ENSG00000150627,ENSG00000159788,ENSG00000120254,ENSG00000147655,ENSG00000168172,ENSG00000137672,ENSG00000181291,ENSG00000182013
CUMS	S32	12106	1535	88	11.1581	8	0.716968	0.687052	0.88431	ENSG00000115137,ENSG00000168280,ENSG00000198707,ENSG00000111348,ENSG00000111262,ENSG00000196876,ENSG00000162104,ENSG00000089057
CUMS	S37	12106	1535	66	8.36858	11	1.31444	1.38001	0.209356	ENSG00000115486,ENSG00000134115,ENSG00000104218,ENSG00000006118,ENSG00000173914,ENSG00000107554,ENSG00000110911,ENSG00000111731,ENSG00000168781,ENSG00000166592,ENSG00000167900
CUMS	S56	12106	1535	69	8.74897	10	1.14299	1.1683	0.376885	ENSG00000114520,ENSG00000157500,ENSG00000071794,ENSG00000112685,ENSG00000146151,ENSG00000125962,ENSG00000149289,ENSG00000170242,ENSG00000133030,ENSG00000277200
CUMS	S69	12106	1535	70	8.87576	9	1.014	1.01616	0.536163	ENSG00000065526,ENSG00000134313,ENSG00000198399,ENSG00000107186,ENSG00000110066,ENSG00000107938,ENSG00000089094,ENSG00000157106,ENSG00000171451
CUMS	S70	12106	1535	98	12.4261	9	0.724284	0.69463	0.88842	ENSG00000146463,ENSG00000142892,ENSG00000170385,ENSG00000197622,ENSG00000119787,ENSG00000076003,ENSG00000184305,ENSG00000205189,ENSG00000067057
CUMS	S76	12106	1535	161	20.4143	22	1.07768	1.0913	0.387555	ENSG00000036549,ENSG00000186364,ENSG00000143889,ENSG00000168702,ENSG00000144426,ENSG00000003402,ENSG00000115295,ENSG00000169313,ENSG00000182168,ENSG00000151790,ENSG00000096060,ENSG00000174469,ENSG00000055609,ENSG00000117868,ENSG00000164684,ENSG00000150275,ENSG00000092148,ENSG00000128872,ENSG00000141736,ENSG00000177150,ENSG00000125827,ENSG00000155304
CUMS	S77	12106	1535	107	13.5672	13	0.958191	0.952001	0.609616	ENSG00000131238,ENSG00000145362,ENSG00000124275,ENSG00000152359,ENSG00000198945,ENSG00000172209,ENSG00000132434,ENSG00000125675,ENSG00000120533,ENSG00000179119,ENSG00000187240,ENSG00000183735,ENSG00000081138
CUMS	S79	12106	1535	55	6.97381	7	1.00375	1.00432	0.556644	ENSG00000132763,ENSG00000138468,ENSG00000114098,ENSG00000148200,ENSG00000182022,ENSG00000136155,ENSG00000136111
CUMS	S91	12106	1535	220	27.8953	31	1.1113	1.13219	0.291142	ENSG00000003393,ENSG00000198380,ENSG00000017260,ENSG00000163673,ENSG00000174695,ENSG00000145715,ENSG00000168566,ENSG00000156564,ENSG00000176595,ENSG00000119318,ENSG00000096968,ENSG00000119396,ENSG00000136770,ENSG00000077420,ENSG00000198408,ENSG00000165813,ENSG00000133704,ENSG00000120837,ENSG00000102531,ENSG00000244754,ENSG00000230778,ENSG00000083799,ENSG00000166263,ENSG00000131467,ENSG00000176749…
CUMS	S92	12106	1535	88	11.1581	8	0.716968	0.687052	0.88431	ENSG00000076356,ENSG00000178177,ENSG00000049860,ENSG00000048405,ENSG00000110367,ENSG00000073614,ENSG00000140995,ENSG00000182831
CUMS	S93	12106	1535	54	6.84702	8	1.16839	1.19869	0.376575	ENSG00000077254,ENSG00000185630,ENSG00000147316,ENSG00000165650,ENSG00000070018,ENSG00000111696,ENSG00000042317,ENSG00000100030
CUMS	S98	12106	1535	110	13.9476	18	1.29054	1.35147	0.153162	ENSG00000172456,ENSG00000114948,ENSG00000077232,ENSG00000116005,ENSG00000055917,ENSG00000154174,ENSG00000144959,ENSG00000198836,ENSG00000164588,ENSG00000158985,ENSG00000111860,ENSG00000112242,ENSG00000153310,ENSG00000188312,ENSG00000107560,ENSG00000119698,ENSG00000137764,ENSG00000129636
CUMS	S102	12106	1535	87	11.0313	9	0.81586	0.793416	0.789755	ENSG00000117118,ENSG00000090621,ENSG00000169291,ENSG00000174748,ENSG00000145685,ENSG00000154079,ENSG00000134594,ENSG00000164758,ENSG00000169758
CUMS	S103	12106	1535	297	37.6586	32	0.84974	0.828022	0.862631	ENSG00000116774,ENSG00000116350,ENSG00000163344,ENSG00000009307,ENSG00000169599,ENSG00000154518,ENSG00000125629,ENSG00000175193,ENSG00000136521,ENSG00000163812,ENSG00000182552,ENSG00000113211,ENSG00000145675,ENSG00000112658,ENSG00000090266,ENSG00000164548,ENSG00000010270,ENSG00000197362,ENSG00000104671,ENSG00000104691,ENSG00000076554,ENSG00000150764,ENSG00000110080,ENSG00000109832,ENSG00000118181…
CUMS	S106	12106	1535	269	34.1083	35	1.02614	1.03076	0.462346	ENSG00000273274,ENSG00000118197,ENSG00000066557,ENSG00000116898,ENSG00000078618,ENSG00000135951,ENSG00000136560,ENSG00000163659,ENSG00000163964,ENSG00000002933,ENSG00000187416,ENSG00000263001,ENSG00000165704,ENSG00000106819,ENSG00000106852,ENSG00000110768,ENSG00000166024,ENSG00000166598,ENSG00000123352,ENSG00000139679,ENSG00000120694,ENSG00000140092,ENSG00000100478,ENSG00000090060,ENSG00000166946…
CUMS	S107	12106	1535	158	20.0339	22	1.09814	1.11563	0.352647	ENSG00000162734,ENSG00000116885,ENSG00000127603,ENSG00000116701,ENSG00000176887,ENSG00000123636,ENSG00000091986,ENSG00000058262,ENSG00000113161,ENSG00000111859,ENSG00000146433,ENSG00000122565,ENSG00000182985,ENSG00000120594,ENSG00000111540,ENSG00000179195,ENSG00000137877,ENSG00000166192,ENSG00000205336,ENSG00000186868,ENSG00000128191,ENSG00000100376
CUMS	S108	12106	1535	88	11.1581	11	0.985831	0.98369	0.568654	ENSG00000009780,ENSG00000120948,ENSG00000173163,ENSG00000164168,ENSG00000001084,ENSG00000104497,ENSG00000147408,ENSG00000150093,ENSG00000167740,ENSG00000127804,ENSG00000154639
CUMS	S109	12106	1535	74	9.38295	8	0.85261	0.833907	0.737102	ENSG00000065243,ENSG00000143179,ENSG00000086200,ENSG00000112210,ENSG00000001630,ENSG00000184672,ENSG00000177830,ENSG00000065559
CUMS	S110	12106	1535	74	9.38295	11	1.17234	1.20387	0.33446	ENSG00000151611,ENSG00000131016,ENSG00000124641,ENSG00000127947,ENSG00000122566,ENSG00000166788,ENSG00000076067,ENSG00000100441,ENSG00000197063,ENSG00000184113,ENSG00000154734
CUMS	S111	12106	1535	70	8.87576	12	1.352	1.42812	0.170474	ENSG00000115738,ENSG00000002549,ENSG00000129116,ENSG00000004799,ENSG00000187325,ENSG00000104341,ENSG00000188997,ENSG00000156110,ENSG00000169884,ENSG00000073712,ENSG00000125375,ENSG00000166123
CUMS	S132	12106	1535	54	6.84702	5	0.730245	0.701766	0.831659	ENSG00000112837,ENSG00000106080,ENSG00000102100,ENSG00000100567,ENSG00000178971
CUMS	S133	12106	1535	92	11.6653	11	0.942968	0.934752	0.630045	ENSG00000143815,ENSG00000114331,ENSG00000112981,ENSG00000183943,ENSG00000243279,ENSG00000030066,ENSG00000182010,ENSG00000120616,ENSG00000178802,ENSG00000140694,ENSG00000120784
CUMS	S136	12106	1535	91	11.5385	11	0.953331	0.946529	0.615116	ENSG00000254685,ENSG00000162616,ENSG00000122507,ENSG00000164631,ENSG00000268089,ENSG00000253719,ENSG00000177889,ENSG00000111412,ENSG00000102543,ENSG00000140382,ENSG00000125870
CUMS	S137	12106	1535	60	7.6078	8	1.05155	1.05981	0.497254	ENSG00000115875,ENSG00000170027,ENSG00000106688,ENSG00000239306,ENSG00000122877,ENSG00000132612,ENSG00000257103,ENSG00000100401
CUMS	S138	12106	1535	54	6.84702	4	0.584196	0.549781	0.924457	ENSG00000154429,ENSG00000120899,ENSG00000134910,ENSG00000103460
CUMS	S147	12106	1535	110	13.9476	14	1.00375	1.00434	0.537317	ENSG00000177807,ENSG00000117598,ENSG00000115306,ENSG00000114279,ENSG00000070087,ENSG00000145721,ENSG00000164332,ENSG00000104290,ENSG00000136856,ENSG00000106772,ENSG00000086848,ENSG00000162076,ENSG00000130703,ENSG00000185658
CUMS	S148	12106	1535	304	38.5462	47	1.21932	1.26759	0.0850669	ENSG00000130766,ENSG00000162396,ENSG00000075945,ENSG00000182901,ENSG00000153936,ENSG00000265491,ENSG00000122417,ENSG00000171853,ENSG00000221823,ENSG00000144362,ENSG00000143933,ENSG00000138071,ENSG00000109738,ENSG00000156475,ENSG00000198780,ENSG00000198833,ENSG00000213079,ENSG00000006715,ENSG00000106105,ENSG00000058404,ENSG00000204116,ENSG00000147676,ENSG00000147650,ENSG00000003987,ENSG00000110675…
CUMS	S160	12106	1535	164	20.7946	19	0.913697	0.901152	0.698973	ENSG00000197121,ENSG00000090989,ENSG00000084093,ENSG00000164466,ENSG00000039139,ENSG00000198755,ENSG00000180354,ENSG00000136999,ENSG00000136891,ENSG00000160695,ENSG00000182957,ENSG00000122025,ENSG00000136153,ENSG00000165959,ENSG00000176903,ENSG00000166822,ENSG00000162065,ENSG00000005100,ENSG00000198743
CUMS	S163	12106	1535	75	9.50975	6	0.630932	0.597286	0.926555	ENSG00000174780,ENSG00000164603,ENSG00000135250,ENSG00000147854,ENSG00000108061,ENSG00000121058
CUMS	S192	12106	1535	216	27.3881	27	0.985831	0.983517	0.563171	ENSG00000160785,ENSG00000182134,ENSG00000075340,ENSG00000144218,ENSG00000010282,ENSG00000155903,ENSG00000132466,ENSG00000152208,ENSG00000185477,ENSG00000138792,ENSG00000197860,ENSG00000156687,ENSG00000156103,ENSG00000048649,ENSG00000133687,ENSG00000151835,ENSG00000168952,ENSG00000140538,ENSG00000108599,ENSG00000108666,ENSG00000153822,ENSG00000170049,ENSG00000167549,ENSG00000100362,ENSG00000100399…
CUMS	S222	12106	1535	207	26.2469	32	1.21919	1.26476	0.135106	ENSG00000143641,ENSG00000135870,ENSG00000162733,ENSG00000119041,ENSG00000138641,ENSG00000164219,ENSG00000145864,ENSG00000050748,ENSG00000031003,ENSG00000172594,ENSG00000112146,ENSG00000136267,ENSG00000131089,ENSG00000067992,ENSG00000102053,ENSG00000155792,ENSG00000205002,ENSG00000137492,ENSG00000183715,ENSG00000166439,ENSG00000166006,ENSG00000166073,ENSG00000198690,ENSG00000159579,ENSG00000168807…
CUMS	S224	12106	1535	70	8.87576	13	1.46466	1.57543	0.0998532	ENSG00000162849,ENSG00000116874,ENSG00000173166,ENSG00000145860,ENSG00000183826,ENSG00000135312,ENSG00000130396,ENSG00000137055,ENSG00000196968,ENSG00000136754,ENSG00000129521,ENSG00000177108,ENSG00000155307
CUMS	S225	12106	1535	52	6.59342	8	1.21333	1.25341	0.336333	ENSG00000153187,ENSG00000115232,ENSG00000144674,ENSG00000124571,ENSG00000118432,ENSG00000129295,ENSG00000232859,ENSG00000185272
CUMS	S228	12106	1535	105	13.3136	19	1.42711	1.52793	0.0682334	ENSG00000173559,ENSG00000155636,ENSG00000186001,ENSG00000144647,ENSG00000113552,ENSG00000176248,ENSG00000148300,ENSG00000129158,ENSG00000102755,ENSG00000137824,ENSG00000103811,ENSG00000104064,ENSG00000179776,ENSG00000074370,ENSG00000101294,ENSG00000161888,ENSG00000100347,ENSG00000141959,ENSG00000198938
CUMS	S230	12106	1535	51	6.46663	4	0.61856	0.585038	0.902137	ENSG00000183654,ENSG00000151923,ENSG00000273559,ENSG00000123146
CUMS	S246	12106	1535	114	14.4548	19	1.31444	1.38201	0.127891	ENSG00000143458,ENSG00000116663,ENSG00000063660,ENSG00000206530,ENSG00000163520,ENSG00000152952,ENSG00000112855,ENSG00000095015,ENSG00000105810,ENSG00000149256,ENSG00000137726,ENSG00000130640,ENSG00000151743,ENSG00000170776,ENSG00000103335,ENSG00000205937,ENSG00000100206,ENSG00000100201,ENSG00000160310
CUMS	S279	12106	1535	53	6.72022	6	0.892828	0.878655	0.678819	ENSG00000157500,ENSG00000071794,ENSG00000112685,ENSG00000149289,ENSG00000170242,ENSG00000133030
CUMS	S290	12106	1535	55	6.97381	8	1.14715	1.17307	0.396826	ENSG00000134313,ENSG00000198399,ENSG00000107186,ENSG00000110066,ENSG00000107938,ENSG00000089094,ENSG00000157106,ENSG00000171451
CUMS	S313	12106	1535	68	8.62217	10	1.1598	1.18856	0.359074	ENSG00000003402,ENSG00000115295,ENSG00000096060,ENSG00000174469,ENSG00000117868,ENSG00000164684,ENSG00000092148,ENSG00000128872,ENSG00000177150,ENSG00000125827
CUMS	S347	12106	1535	112	14.2012	18	1.2675	1.32246	0.171957	ENSG00000198380,ENSG00000017260,ENSG00000174695,ENSG00000145715,ENSG00000176595,ENSG00000119318,ENSG00000096968,ENSG00000198408,ENSG00000165813,ENSG00000133704,ENSG00000102531,ENSG00000244754,ENSG00000083799,ENSG00000166263,ENSG00000131467,ENSG00000141404,ENSG00000101109,ENSG00000101152
CUMS	S378	12106	1535	61	7.73459	4	0.517157	0.481946	0.959764	ENSG00000117118,ENSG00000174748,ENSG00000134594,ENSG00000164758
CUMS	S383	12106	1535	89	11.2849	10	0.88614	0.870866	0.706489	ENSG00000009307,ENSG00000169599,ENSG00000136521,ENSG00000145675,ENSG00000090266,ENSG00000104671,ENSG00000104691,ENSG00000076554,ENSG00000109832,ENSG00000165672
CUMS	S401	12106	1535	154	19.5267	17	0.870604	0.85295	0.765481	ENSG00000273274,ENSG00000116898,ENSG00000136560,ENSG00000163659,ENSG00000163964,ENSG00000263001,ENSG00000165704,ENSG00000106819,ENSG00000110768,ENSG00000166024,ENSG00000166946,ENSG00000180304,ENSG00000185624,ENSG00000132589,ENSG00000141279,ENSG00000125821,ENSG00000186654
CUMS	S612	12106	1535	104	13.1868	19	1.44083	1.54606	0.0630523	ENSG00000143641,ENSG00000135870,ENSG00000119041,ENSG00000138641,ENSG00000164219,ENSG00000050748,ENSG00000031003,ENSG00000172594,ENSG00000136267,ENSG00000131089,ENSG00000102053,ENSG00000137492,ENSG00000183715,ENSG00000166439,ENSG00000166006,ENSG00000166073,ENSG00000166342,ENSG00000168675,ENSG00000133424
CUMS	S749	12106	1535	65	8.24178	13	1.57733	1.72773	0.0620546	ENSG00000198380,ENSG00000017260,ENSG00000145715,ENSG00000119318,ENSG00000198408,ENSG00000165813,ENSG00000133704,ENSG00000102531,ENSG00000244754,ENSG00000083799,ENSG00000166263,ENSG00000141404,ENSG00000101109
CUMS	S787	12106	1535	54	6.84702	8	1.16839	1.19869	0.376575	ENSG00000009307,ENSG00000169599,ENSG00000136521,ENSG00000145675,ENSG00000104671,ENSG00000104691,ENSG00000109832,ENSG00000165672
CUMS	S803	12106	1535	67	8.49537	7	0.823978	0.802556	0.762086	ENSG00000116898,ENSG00000263001,ENSG00000165704,ENSG00000180304,ENSG00000185624,ENSG00000132589,ENSG00000141279
MDD	S3	12106	1484	61	7.47761	6	0.802395	0.779963	0.774556	ENSG00000120942,ENSG00000172554,ENSG00000163328,ENSG00000144821,ENSG00000107679,ENSG00000109084
MDD	S6	12106	1484	227	27.8265	19	0.682802	0.649358	0.976402	ENSG00000142856,ENSG00000163125,ENSG00000143952,ENSG00000173692,ENSG00000135913,ENSG00000068878,ENSG00000135900,ENSG00000163714,ENSG00000145390,ENSG00000113595,ENSG00000146151,ENSG00000125962,ENSG00000048392,ENSG00000134531,ENSG00000130779,ENSG00000140443,ENSG00000140545,ENSG00000108654,ENSG00000132872
MDD	S8	12106	1484	268	32.8525	36	1.09581	1.11338	0.303083	ENSG00000175087,ENSG00000188786,ENSG00000162852,ENSG00000121644,ENSG00000162630,ENSG00000065526,ENSG00000076003,ENSG00000118242,ENSG00000115839,ENSG00000134121,ENSG00000091972,ENSG00000185149,ENSG00000145242,ENSG00000128059,ENSG00000123213,ENSG00000181104,ENSG00000178175,ENSG00000146376,ENSG00000135540,ENSG00000106524,ENSG00000005483,ENSG00000158301,ENSG00000198887,ENSG00000107789,ENSG00000203780…
MDD	S9	12106	1484	526	64.4791	73	1.13215	1.16135	0.138314	ENSG00000116675,ENSG00000130768,ENSG00000131238,ENSG00000169641,ENSG00000058804,ENSG00000163029,ENSG00000054219,ENSG00000003402,ENSG00000068912,ENSG00000153208,ENSG00000163803,ENSG00000115419,ENSG00000163939,ENSG00000163590,ENSG00000211456,ENSG00000163728,ENSG00000114573,ENSG00000169116,ENSG00000138769,ENSG00000151718,ENSG00000131711,ENSG00000113657,ENSG00000072364,ENSG00000164620,ENSG00000009413…
MDD	S10	12106	1484	443	54.3046	63	1.16012	1.19491	0.114557	ENSG00000127124,ENSG00000079335,ENSG00000135862,ENSG00000213064,ENSG00000173726,ENSG00000092969,ENSG00000162636,ENSG00000132718,ENSG00000162520,ENSG00000116688,ENSG00000116729,ENSG00000174453,ENSG00000125633,ENSG00000196151,ENSG00000196277,ENSG00000121871,ENSG00000152642,ENSG00000118579,ENSG00000196159,ENSG00000138757,ENSG00000178177,ENSG00000113300,ENSG00000013561,ENSG00000253305,ENSG00000189241…
MDD	S11	12106	1484	214	26.2329	41	1.56292	1.71602	0.00228164	ENSG00000142949,ENSG00000117523,ENSG00000134369,ENSG00000157933,ENSG00000114948,ENSG00000077044,ENSG00000116005,ENSG00000115310,ENSG00000154174,ENSG00000144959,ENSG00000198836,ENSG00000174579,ENSG00000164122,ENSG00000164031,ENSG00000152932,ENSG00000164209,ENSG00000091009,ENSG00000022355,ENSG00000170464,ENSG00000072803,ENSG00000185305,ENSG00000164463,ENSG00000113456,ENSG00000145495,ENSG00000146476…
MDD	S12	12106	1484	1436	176.03	170	0.965742	0.956103	0.710215	ENSG00000116954,ENSG00000142686,ENSG00000065243,ENSG00000172339,ENSG00000162377,ENSG00000143156,ENSG00000116161,ENSG00000162734,ENSG00000142871,ENSG00000189339,ENSG00000177606,ENSG00000156171,ENSG00000181754,ENSG00000121774,ENSG00000159164,ENSG00000162631,ENSG00000160789,ENSG00000116922,ENSG00000196182,ENSG00000116560,ENSG00000163349,ENSG00000143442,ENSG00000136718,ENSG00000115233,ENSG00000128654…
MDD	S14	12106	1484	215	26.3555	24	0.910625	0.897728	0.71988	ENSG00000143786,ENSG00000117036,ENSG00000151092,ENSG00000144791,ENSG00000088727,ENSG00000071127,ENSG00000145365,ENSG00000173545,ENSG00000164326,ENSG00000112367,ENSG00000105793,ENSG00000070718,ENSG00000030066,ENSG00000150051,ENSG00000156042,ENSG00000139324,ENSG00000178802,ENSG00000104731,ENSG00000186153,ENSG00000132386,ENSG00000141378,ENSG00000205138,ENSG00000100284,ENSG00000183527
MDD	S15	12106	1484	307	37.6332	34	0.903457	0.888869	0.763817	ENSG00000011021,ENSG00000188641,ENSG00000158816,ENSG00000114933,ENSG00000171303,ENSG00000163798,ENSG00000151690,ENSG00000144635,ENSG00000163655,ENSG00000047315,ENSG00000170445,ENSG00000168916,ENSG00000150753,ENSG00000111879,ENSG00000164434,ENSG00000122507,ENSG00000187601,ENSG00000198934,ENSG00000000003,ENSG00000013619,ENSG00000137691,ENSG00000239306,ENSG00000119965,ENSG00000122877,ENSG00000151474…
MDD	S16	12106	1484	471	57.737	74	1.28167	1.35168	0.0139449	ENSG00000130766,ENSG00000116133,ENSG00000075945,ENSG00000143756,ENSG00000183831,ENSG00000171488,ENSG00000025800,ENSG00000142875,ENSG00000117153,ENSG00000117595,ENSG00000265491,ENSG00000085832,ENSG00000196950,ENSG00000172292,ENSG00000134318,ENSG00000143933,ENSG00000181789,ENSG00000138660,ENSG00000198589,ENSG00000109436,ENSG00000109738,ENSG00000164190,ENSG00000131507,ENSG00000082213,ENSG00000085365…
MDD	S17	12106	1484	123	15.0778	26	1.72439	1.93489	0.00356694	ENSG00000143158,ENSG00000172031,ENSG00000116750,ENSG00000134684,ENSG00000164086,ENSG00000125037,ENSG00000109519,ENSG00000134480,ENSG00000175449,ENSG00000122557,ENSG00000182916,ENSG00000126733,ENSG00000029534,ENSG00000241697,ENSG00000096872,ENSG00000174080,ENSG00000151366,ENSG00000165637,ENSG00000122965,ENSG00000100554,ENSG00000128739,ENSG00000104142,ENSG00000069345,ENSG00000174938,ENSG00000108528…
MDD	S18	12106	1484	228	27.9491	25	0.894483	0.879438	0.755063	ENSG00000134744,ENSG00000177181,ENSG00000115368,ENSG00000144061,ENSG00000157985,ENSG00000114841,ENSG00000168137,ENSG00000168038,ENSG00000039139,ENSG00000105948,ENSG00000122512,ENSG00000119383,ENSG00000165832,ENSG00000132334,ENSG00000188596,ENSG00000123411,ENSG00000161791,ENSG00000187535,ENSG00000159593,ENSG00000005194,ENSG00000067955,ENSG00000078687,ENSG00000053747,ENSG00000166377,ENSG00000131044
MDD	S19	12106	1484	439	53.8143	42	0.780462	0.750182	0.969358	ENSG00000085433,ENSG00000122482,ENSG00000196482,ENSG00000119801,ENSG00000115641,ENSG00000116120,ENSG00000120742,ENSG00000114686,ENSG00000163788,ENSG00000163913,ENSG00000144645,ENSG00000129625,ENSG00000113327,ENSG00000134987,ENSG00000146143,ENSG00000120265,ENSG00000128590,ENSG00000105819,ENSG00000086289,ENSG00000188191,ENSG00000155961,ENSG00000101911,ENSG00000184368,ENSG00000180964,ENSG00000155097…
MDD	S21	12106	1484	297	36.4074	29	0.796541	0.770047	0.925281	ENSG00000182134,ENSG00000135631,ENSG00000008869,ENSG00000138078,ENSG00000114346,ENSG00000179097,ENSG00000138792,ENSG00000197860,ENSG00000113361,ENSG00000243232,ENSG00000079215,ENSG00000253537,ENSG00000112293,ENSG00000157741,ENSG00000169933,ENSG00000240694,ENSG00000156486,ENSG00000167112,ENSG00000155158,ENSG00000110693,ENSG00000166436,ENSG00000171681,ENSG00000102466,ENSG00000100629,ENSG00000108666…
MDD	S22	12106	1484	302	37.0203	51	1.37762	1.47046	0.010459	ENSG00000162694,ENSG00000134375,ENSG00000156869,ENSG00000118733,ENSG00000066279,ENSG00000116459,ENSG00000143153,ENSG00000163449,ENSG00000079785,ENSG00000144306,ENSG00000115170,ENSG00000143970,ENSG00000134330,ENSG00000128656,ENSG00000182247,ENSG00000163536,ENSG00000038274,ENSG00000164291,ENSG00000113575,ENSG00000213585,ENSG00000153922,ENSG00000203734,ENSG00000106537,ENSG00000196937,ENSG00000006652…
MDD	S24	12106	1484	267	32.7299	39	1.19157	1.23037	0.138801	ENSG00000131697,ENSG00000055813,ENSG00000115840,ENSG00000138018,ENSG00000173705,ENSG00000240891,ENSG00000136603,ENSG00000163577,ENSG00000188582,ENSG00000198961,ENSG00000145864,ENSG00000137364,ENSG00000111911,ENSG00000112146,ENSG00000118518,ENSG00000106571,ENSG00000198898,ENSG00000158321,ENSG00000067992,ENSG00000104490,ENSG00000147852,ENSG00000165023,ENSG00000149575,ENSG00000166439,ENSG00000150054…
MDD	S25	12106	1484	155	19.0005	16	0.842083	0.822009	0.803871	ENSG00000134253,ENSG00000035687,ENSG00000186377,ENSG00000152061,ENSG00000180488,ENSG00000153187,ENSG00000144320,ENSG00000131437,ENSG00000145860,ENSG00000007944,ENSG00000122335,ENSG00000008277,ENSG00000086300,ENSG00000083223,ENSG00000165973,ENSG00000123066
MDD	S26	12106	1484	203	24.8845	29	1.16538	1.19677	0.214526	ENSG00000134376,ENSG00000187605,ENSG00000155760,ENSG00000144407,ENSG00000119812,ENSG00000004838,ENSG00000186001,ENSG00000172020,ENSG00000144857,ENSG00000144647,ENSG00000249242,ENSG00000138821,ENSG00000145526,ENSG00000113552,ENSG00000006453,ENSG00000178125,ENSG00000110107,ENSG00000133812,ENSG00000149564,ENSG00000151655,ENSG00000107959,ENSG00000123240,ENSG00000156515,ENSG00000139428,ENSG00000134874…
MDD	S27	12106	1484	240	29.4201	32	1.08769	1.10344	0.33242	ENSG00000014914,ENSG00000153237,ENSG00000124357,ENSG00000225526,ENSG00000004534,ENSG00000163132,ENSG00000164815,ENSG00000006704,ENSG00000046651,ENSG00000175324,ENSG00000181090,ENSG00000119397,ENSG00000109920,ENSG00000172269,ENSG00000138286,ENSG00000111641,ENSG00000076108,ENSG00000196510,ENSG00000080823,ENSG00000197119,ENSG00000138587,ENSG00000137842,ENSG00000175318,ENSG00000103653,ENSG00000167394…
MDD	S28	12106	1484	71	8.70345	7	0.804279	0.781857	0.783278	ENSG00000203666,ENSG00000163006,ENSG00000113638,ENSG00000183696,ENSG00000147465,ENSG00000148229,ENSG00000136404
MDD	S29	12106	1484	164	20.1038	28	1.39277	1.48269	0.0426581	ENSG00000097046,ENSG00000143437,ENSG00000119772,ENSG00000206530,ENSG00000158163,ENSG00000198301,ENSG00000164038,ENSG00000135315,ENSG00000164694,ENSG00000135541,ENSG00000013392,ENSG00000196367,ENSG00000164949,ENSG00000164989,ENSG00000109956,ENSG00000151743,ENSG00000158023,ENSG00000133858,ENSG00000205693,ENSG00000187498,ENSG00000150401,ENSG00000170776,ENSG00000198838,ENSG00000129993,ENSG00000172530…
MDD	S31	12106	1484	65	7.96795	5	0.627514	0.595131	0.913575	ENSG00000173175,ENSG00000147655,ENSG00000137672,ENSG00000186174,ENSG00000020922
MDD	S32	12106	1484	88	10.7874	11	1.01971	1.0227	0.521099	ENSG00000136531,ENSG00000164187,ENSG00000157680,ENSG00000175573,ENSG00000149582,ENSG00000107872,ENSG00000111262,ENSG00000196876,ENSG00000104154,ENSG00000178502,ENSG00000188039
MDD	S37	12106	1484	66	8.09053	7	0.865209	0.848539	0.714613	ENSG00000117114,ENSG00000115750,ENSG00000168763,ENSG00000164512,ENSG00000118690,ENSG00000104218,ENSG00000171811
MDD	S56	12106	1484	69	8.45829	10	1.18227	1.21459	0.336418	ENSG00000163125,ENSG00000173692,ENSG00000135913,ENSG00000135900,ENSG00000163714,ENSG00000146151,ENSG00000125962,ENSG00000048392,ENSG00000108654,ENSG00000132872
MDD	S69	12106	1484	70	8.58087	12	1.39846	1.48476	0.143535	ENSG00000175087,ENSG00000188786,ENSG00000162630,ENSG00000065526,ENSG00000134121,ENSG00000185149,ENSG00000145242,ENSG00000178175,ENSG00000146376,ENSG00000135540,ENSG00000157106,ENSG00000197183
MDD	S70	12106	1484	98	12.0132	10	0.832417	0.812129	0.776955	ENSG00000162852,ENSG00000076003,ENSG00000091972,ENSG00000005483,ENSG00000158301,ENSG00000203780,ENSG00000067057,ENSG00000182768,ENSG00000100316,ENSG00000184900
MDD	S76	12106	1484	161	19.736	18	0.912039	0.89974	0.69826	ENSG00000116675,ENSG00000058804,ENSG00000003402,ENSG00000153208,ENSG00000114573,ENSG00000151718,ENSG00000072364,ENSG00000106392,ENSG00000055609,ENSG00000018236,ENSG00000126773,ENSG00000100580,ENSG00000140157,ENSG00000167258,ENSG00000101493,ENSG00000125827,ENSG00000159082,ENSG00000155304
MDD	S77	12106	1484	107	13.1165	15	1.1436	1.16869	0.330027	ENSG00000131238,ENSG00000163029,ENSG00000068912,ENSG00000115419,ENSG00000211456,ENSG00000169116,ENSG00000131711,ENSG00000164620,ENSG00000198478,ENSG00000179119,ENSG00000187240,ENSG00000183735,ENSG00000197930,ENSG00000104093,ENSG00000081138
MDD	S79	12106	1484	55	6.74211	10	1.48321	1.59452	0.129701	ENSG00000163939,ENSG00000163728,ENSG00000113657,ENSG00000081803,ENSG00000101901,ENSG00000198846,ENSG00000186638,ENSG00000184575,ENSG00000111711,ENSG00000153933
MDD	S91	12106	1484	220	26.9684	28	1.03825	1.04468	0.446252	ENSG00000116688,ENSG00000125633,ENSG00000196277,ENSG00000152642,ENSG00000118579,ENSG00000138757,ENSG00000113300,ENSG00000013561,ENSG00000253305,ENSG00000189241,ENSG00000065609,ENSG00000170419,ENSG00000064419,ENSG00000165169,ENSG00000147416,ENSG00000040341,ENSG00000136770,ENSG00000111667,ENSG00000139505,ENSG00000069329,ENSG00000131467,ENSG00000073969,ENSG00000171791,ENSG00000101654,ENSG00000101109…
MDD	S92	12106	1484	88	10.7874	12	1.11241	1.13118	0.393327	ENSG00000135862,ENSG00000132718,ENSG00000116729,ENSG00000196159,ENSG00000178177,ENSG00000034239,ENSG00000085788,ENSG00000126883,ENSG00000165660,ENSG00000139323,ENSG00000153944,ENSG00000108854
MDD	S93	12106	1484	54	6.61953	7	1.05748	1.06636	0.498699	ENSG00000173726,ENSG00000121871,ENSG00000198689,ENSG00000104643,ENSG00000080298,ENSG00000119979,ENSG00000070413
MDD	S98	12106	1484	110	13.4842	21	1.55738	1.69868	0.025149	ENSG00000114948,ENSG00000116005,ENSG00000154174,ENSG00000144959,ENSG00000198836,ENSG00000174579,ENSG00000164031,ENSG00000152932,ENSG00000164209,ENSG00000091009,ENSG00000170464,ENSG00000072803,ENSG00000164463,ENSG00000145495,ENSG00000058091,ENSG00000180182,ENSG00000067715,ENSG00000129636,ENSG00000134278,ENSG00000125814,ENSG00000167065
MDD	S102	12106	1484	87	10.6648	10	0.937665	0.929088	0.635358	ENSG00000143156,ENSG00000116922,ENSG00000010256,ENSG00000167114,ENSG00000165724,ENSG00000175470,ENSG00000173267,ENSG00000123297,ENSG00000159720,ENSG00000167642
MDD	S103	12106	1484	297	36.4074	34	0.933876	0.923569	0.693197	ENSG00000172339,ENSG00000115233,ENSG00000154518,ENSG00000123983,ENSG00000138442,ENSG00000125629,ENSG00000138069,ENSG00000175928,ENSG00000156976,ENSG00000136521,ENSG00000113966,ENSG00000145354,ENSG00000164032,ENSG00000169288,ENSG00000109270,ENSG00000113597,ENSG00000197822,ENSG00000164548,ENSG00000080802,ENSG00000102390,ENSG00000147862,ENSG00000149547,ENSG00000178202,ENSG00000109832,ENSG00000175395…
MDD	S106	12106	1484	269	32.9751	35	1.06141	1.07231	0.379294	ENSG00000162377,ENSG00000116161,ENSG00000128654,ENSG00000163171,ENSG00000163001,ENSG00000163659,ENSG00000163964,ENSG00000113811,ENSG00000109180,ENSG00000237190,ENSG00000154978,ENSG00000186310,ENSG00000130830,ENSG00000203879,ENSG00000168546,ENSG00000104435,ENSG00000155876,ENSG00000129084,ENSG00000139112,ENSG00000111674,ENSG00000150457,ENSG00000100796,ENSG00000178761,ENSG00000103591,ENSG00000117906…
MDD	S107	12106	1484	158	19.3682	19	0.980987	0.978109	0.572574	ENSG00000162734,ENSG00000121774,ENSG00000159164,ENSG00000163349,ENSG00000143442,ENSG00000136718,ENSG00000115828,ENSG00000111859,ENSG00000146433,ENSG00000120526,ENSG00000109929,ENSG00000182985,ENSG00000162129,ENSG00000108094,ENSG00000111540,ENSG00000065057,ENSG00000181610,ENSG00000131470,ENSG00000100376
MDD	S108	12106	1484	88	10.7874	12	1.11241	1.13118	0.393327	ENSG00000116954,ENSG00000156171,ENSG00000181754,ENSG00000138668,ENSG00000120733,ENSG00000253873,ENSG00000185127,ENSG00000104497,ENSG00000196305,ENSG00000182359,ENSG00000148481,ENSG00000126821
MDD	S109	12106	1484	74	9.0712	15	1.65358	1.828	0.033023	ENSG00000065243,ENSG00000162631,ENSG00000181555,ENSG00000112972,ENSG00000146731,ENSG00000182220,ENSG00000186462,ENSG00000125354,ENSG00000165084,ENSG00000078668,ENSG00000137040,ENSG00000148120,ENSG00000149313,ENSG00000138138,ENSG00000065559
MDD	S110	12106	1484	74	9.0712	7	0.771673	0.746639	0.818115	ENSG00000116560,ENSG00000174705,ENSG00000197208,ENSG00000146242,ENSG00000122566,ENSG00000064763,ENSG00000089280
MDD	S111	12106	1484	70	8.58087	7	0.815768	0.794345	0.770618	ENSG00000115520,ENSG00000049883,ENSG00000004799,ENSG00000102181,ENSG00000087301,ENSG00000165409,ENSG00000152214
MDD	S132	12106	1484	54	6.61953	4	0.604273	0.571481	0.911234	ENSG00000144791,ENSG00000088727,ENSG00000150051,ENSG00000186153
MDD	S133	12106	1484	92	11.2777	15	1.33006	1.39833	0.15184	ENSG00000143786,ENSG00000117036,ENSG00000151092,ENSG00000071127,ENSG00000145365,ENSG00000173545,ENSG00000112367,ENSG00000105793,ENSG00000070718,ENSG00000030066,ENSG00000139324,ENSG00000178802,ENSG00000141378,ENSG00000205138,ENSG00000183527
MDD	S136	12106	1484	91	11.1551	12	1.07574	1.08798	0.440343	ENSG00000011021,ENSG00000163798,ENSG00000151690,ENSG00000144635,ENSG00000163655,ENSG00000047315,ENSG00000150753,ENSG00000122507,ENSG00000187601,ENSG00000119965,ENSG00000087470,ENSG00000153982
MDD	S137	12106	1484	60	7.35503	7	0.95173	0.945094	0.614776	ENSG00000170445,ENSG00000198934,ENSG00000000003,ENSG00000239306,ENSG00000122877,ENSG00000257103,ENSG00000100401
MDD	S138	12106	1484	54	6.61953	10	1.51068	1.63091	0.118379	ENSG00000188641,ENSG00000158816,ENSG00000168916,ENSG00000111879,ENSG00000013619,ENSG00000137691,ENSG00000151474,ENSG00000135457,ENSG00000058335,ENSG00000089101
MDD	S147	12106	1484	110	13.4842	21	1.55738	1.69868	0.025149	ENSG00000143756,ENSG00000183831,ENSG00000171488,ENSG00000025800,ENSG00000117153,ENSG00000117595,ENSG00000198589,ENSG00000109436,ENSG00000164190,ENSG00000164332,ENSG00000102218,ENSG00000104388,ENSG00000155970,ENSG00000175582,ENSG00000168014,ENSG00000136738,ENSG00000131966,ENSG00000100934,ENSG00000141576,ENSG00000062725,ENSG00000124207
MDD	S148	12106	1484	304	37.2655	49	1.31489	1.38817	0.0264619	ENSG00000130766,ENSG00000075945,ENSG00000142875,ENSG00000265491,ENSG00000085832,ENSG00000196950,ENSG00000172292,ENSG00000134318,ENSG00000143933,ENSG00000181789,ENSG00000138660,ENSG00000109738,ENSG00000131507,ENSG00000082213,ENSG00000085365,ENSG00000118402,ENSG00000119899,ENSG00000213079,ENSG00000112237,ENSG00000272514,ENSG00000111897,ENSG00000004766,ENSG00000158560,ENSG00000047597,ENSG00000073464…
MDD	S160	12106	1484	164	20.1038	13	0.646646	0.612854	0.971828	ENSG00000177181,ENSG00000115368,ENSG00000144061,ENSG00000157985,ENSG00000168137,ENSG00000039139,ENSG00000105948,ENSG00000119383,ENSG00000132334,ENSG00000159593,ENSG00000005194,ENSG00000067955,ENSG00000166377
MDD	S163	12106	1484	75	9.19379	4	0.435076	0.401658	0.986468	ENSG00000134987,ENSG00000128590,ENSG00000171204,ENSG00000095564
MDD	S192	12106	1484	216	26.4781	23	0.868642	0.850705	0.79537	ENSG00000182134,ENSG00000135631,ENSG00000008869,ENSG00000138078,ENSG00000138792,ENSG00000197860,ENSG00000113361,ENSG00000243232,ENSG00000253537,ENSG00000112293,ENSG00000169933,ENSG00000240694,ENSG00000156486,ENSG00000155158,ENSG00000110693,ENSG00000166436,ENSG00000171681,ENSG00000102466,ENSG00000108666,ENSG00000153822,ENSG00000171634,ENSG00000101350,ENSG00000100362
MDD	S222	12106	1484	207	25.3749	34	1.33991	1.4162	0.0452912	ENSG00000055813,ENSG00000115840,ENSG00000138018,ENSG00000173705,ENSG00000240891,ENSG00000136603,ENSG00000188582,ENSG00000198961,ENSG00000145864,ENSG00000137364,ENSG00000111911,ENSG00000112146,ENSG00000118518,ENSG00000106571,ENSG00000198898,ENSG00000158321,ENSG00000067992,ENSG00000104490,ENSG00000147852,ENSG00000165023,ENSG00000149575,ENSG00000166439,ENSG00000150054,ENSG00000095637,ENSG00000151320…
MDD	S224	12106	1484	70	8.58087	4	0.466153	0.43229	0.978355	ENSG00000131437,ENSG00000145860,ENSG00000086300,ENSG00000123066
MDD	S225	12106	1484	52	6.37436	5	0.784392	0.760665	0.780606	ENSG00000153187,ENSG00000122335,ENSG00000008277,ENSG00000083223,ENSG00000165973
MDD	S228	12106	1484	105	12.8713	16	1.24308	1.28987	0.211762	ENSG00000119812,ENSG00000004838,ENSG00000186001,ENSG00000172020,ENSG00000144857,ENSG00000144647,ENSG00000249242,ENSG00000145526,ENSG00000113552,ENSG00000006453,ENSG00000178125,ENSG00000110107,ENSG00000149564,ENSG00000156515,ENSG00000134874,ENSG00000140948
MDD	S230	12106	1484	51	6.25178	5	0.799773	0.777273	0.765779	ENSG00000153237,ENSG00000004534,ENSG00000167394,ENSG00000122257,ENSG00000242259
MDD	S246	12106	1484	114	13.9746	20	1.43117	1.52999	0.0615292	ENSG00000097046,ENSG00000206530,ENSG00000158163,ENSG00000198301,ENSG00000164038,ENSG00000135315,ENSG00000135541,ENSG00000013392,ENSG00000196367,ENSG00000164989,ENSG00000109956,ENSG00000151743,ENSG00000158023,ENSG00000133858,ENSG00000205693,ENSG00000150401,ENSG00000170776,ENSG00000198838,ENSG00000183914,ENSG00000129351
MDD	S279	12106	1484	53	6.49694	7	1.07743	1.08966	0.478205	ENSG00000163125,ENSG00000173692,ENSG00000135913,ENSG00000163714,ENSG00000048392,ENSG00000108654,ENSG00000132872
MDD	S290	12106	1484	55	6.74211	9	1.33489	1.40281	0.22678	ENSG00000188786,ENSG00000162630,ENSG00000134121,ENSG00000185149,ENSG00000145242,ENSG00000178175,ENSG00000135540,ENSG00000157106,ENSG00000197183
MDD	S313	12106	1484	68	8.3357	10	1.19966	1.23565	0.319546	ENSG00000003402,ENSG00000114573,ENSG00000151718,ENSG00000072364,ENSG00000018236,ENSG00000126773,ENSG00000100580,ENSG00000101493,ENSG00000125827,ENSG00000159082
MDD	S347	12106	1484	112	13.7294	17	1.23822	1.28407	0.207443	ENSG00000196277,ENSG00000152642,ENSG00000138757,ENSG00000113300,ENSG00000013561,ENSG00000065609,ENSG00000170419,ENSG00000064419,ENSG00000165169,ENSG00000147416,ENSG00000069329,ENSG00000131467,ENSG00000171791,ENSG00000101109,ENSG00000101152,ENSG00000204851,ENSG00000253352
MDD	S378	12106	1484	61	7.47761	8	1.06986	1.08086	0.476752	ENSG00000143156,ENSG00000167114,ENSG00000165724,ENSG00000175470,ENSG00000173267,ENSG00000123297,ENSG00000159720,ENSG00000167642
MDD	S383	12106	1484	89	10.91	12	1.09991	1.11638	0.408988	ENSG00000138069,ENSG00000156976,ENSG00000136521,ENSG00000113966,ENSG00000145354,ENSG00000164032,ENSG00000109270,ENSG00000109832,ENSG00000065154,ENSG00000180817,ENSG00000111726,ENSG00000134440
MDD	S401	12106	1484	154	18.8779	22	1.16538	1.19583	0.252715	ENSG00000162377,ENSG00000116161,ENSG00000163001,ENSG00000163659,ENSG00000163964,ENSG00000109180,ENSG00000186310,ENSG00000130830,ENSG00000203879,ENSG00000104435,ENSG00000155876,ENSG00000129084,ENSG00000139112,ENSG00000150457,ENSG00000178761,ENSG00000117906,ENSG00000140740,ENSG00000126581,ENSG00000141030,ENSG00000132589,ENSG00000206418,ENSG00000149657
MDD	S612	12106	1484	104	12.7487	19	1.49035	1.60765	0.0476453	ENSG00000055813,ENSG00000115840,ENSG00000138018,ENSG00000136603,ENSG00000188582,ENSG00000198961,ENSG00000111911,ENSG00000118518,ENSG00000198898,ENSG00000104490,ENSG00000147852,ENSG00000149575,ENSG00000166439,ENSG00000151320,ENSG00000174373,ENSG00000128881,ENSG00000103343,ENSG00000007168,ENSG00000141367
MDD	S749	12106	1484	65	7.96795	11	1.38053	1.46141	0.166875	ENSG00000152642,ENSG00000138757,ENSG00000113300,ENSG00000065609,ENSG00000170419,ENSG00000064419,ENSG00000165169,ENSG00000147416,ENSG00000069329,ENSG00000101109,ENSG00000253352
MDD	S787	12106	1484	54	6.61953	7	1.05748	1.06636	0.498699	ENSG00000138069,ENSG00000156976,ENSG00000136521,ENSG00000109270,ENSG00000109832,ENSG00000065154,ENSG00000180817
MDD	S803	12106	1484	67	8.21312	10	1.21756	1.25744	0.302864	ENSG00000162377,ENSG00000163001,ENSG00000109180,ENSG00000203879,ENSG00000104435,ENSG00000155876,ENSG00000129084,ENSG00000139112,ENSG00000126581,ENSG00000132589

## Sheet: DEG.enrichment.CUMS.module
set1_Name	set2_Name	Background	set1_size	set2_size	expected.overlap	actual.overlap	enrichment.foldchange	odds.ratio	FET_pvalue	intersects
FMT	U2	12106	339	422	11.8171	21	1.77708	1.8717	0.00786251	ENSG00000058085,ENSG00000180287,ENSG00000083444,ENSG00000117115,ENSG00000143418,ENSG00000116473,ENSG00000169504,ENSG00000172331,ENSG00000197892,ENSG00000085117,ENSG00000175104,ENSG00000099282,ENSG00000010278,ENSG00000073417,ENSG00000173548,ENSG00000167930,ENSG00000102967,ENSG00000068079,ENSG00000006042,ENSG00000099840,ENSG00000167037
FMT	U3	12106	339	1029	28.8147	21	0.728794	0.704887	0.95493	ENSG00000162627,ENSG00000170144,ENSG00000180914,ENSG00000179796,ENSG00000173085,ENSG00000124767,ENSG00000146192,ENSG00000222011,ENSG00000102359,ENSG00000120963,ENSG00000104231,ENSG00000196358,ENSG00000173227,ENSG00000110400,ENSG00000185507,ENSG00000179104,ENSG00000136153,ENSG00000090470,ENSG00000126351,ENSG00000154914,ENSG00000129347
FMT	U5	12106	339	1682	47.1004	46	0.976636	0.972208	0.593981	ENSG00000116690,ENSG00000143816,ENSG00000186283,ENSG00000196975,ENSG00000178171,ENSG00000144306,ENSG00000157036,ENSG00000158163,ENSG00000129187,ENSG00000113212,ENSG00000113328,ENSG00000155868,ENSG00000146453,ENSG00000172426,ENSG00000078269,ENSG00000240065,ENSG00000146433,ENSG00000146243,ENSG00000197150,ENSG00000164638,ENSG00000130822,ENSG00000185189,ENSG00000119509,ENSG00000173258,ENSG00000174804…
FMT	U6	12106	339	838	23.4662	25	1.06536	1.07276	0.400435	ENSG00000094963,ENSG00000243147,ENSG00000180398,ENSG00000135636,ENSG00000144648,ENSG00000114779,ENSG00000136059,ENSG00000164035,ENSG00000157510,ENSG00000198729,ENSG00000204248,ENSG00000102032,ENSG00000137133,ENSG00000147912,ENSG00000177830,ENSG00000186862,ENSG00000122367,ENSG00000171435,ENSG00000139880,ENSG00000176715,ENSG00000185262,ENSG00000141349,ENSG00000149600,ENSG00000167483,ENSG00000184979
FMT	U7	12106	339	385	10.781	11	1.02031	1.02161	0.516577	ENSG00000116918,ENSG00000162998,ENSG00000168811,ENSG00000155511,ENSG00000205279,ENSG00000025039,ENSG00000183166,ENSG00000111218,ENSG00000173805,ENSG00000272636,ENSG00000101230
FMT	U8	12106	339	366	10.249	7	0.682996	0.670012	0.891849	ENSG00000136518,ENSG00000163673,ENSG00000007944,ENSG00000152558,ENSG00000149577,ENSG00000182718,ENSG00000242247
FMT	U9	12106	339	453	12.6852	12	0.945984	0.942482	0.620097	ENSG00000066322,ENSG00000163482,ENSG00000186352,ENSG00000204264,ENSG00000168394,ENSG00000096092,ENSG00000106070,ENSG00000170632,ENSG00000184867,ENSG00000181234,ENSG00000089154,ENSG00000100983
FMT	U10	12106	339	193	5.40451	12	2.22037	2.34877	0.00816476	ENSG00000162639,ENSG00000135926,ENSG00000164292,ENSG00000204580,ENSG00000176485,ENSG00000166387,ENSG00000110092,ENSG00000066468,ENSG00000127334,ENSG00000111266,ENSG00000136167,ENSG00000100418
FMT	U11	12106	339	290	8.12077	9	1.10827	1.11477	0.42469	ENSG00000153237,ENSG00000044524,ENSG00000146072,ENSG00000130368,ENSG00000169398,ENSG00000214050,ENSG00000183908,ENSG00000136155,ENSG00000126803
FMT	U12	12106	339	159	4.45242	6	1.34758	1.36766	0.286962	ENSG00000197852,ENSG00000152413,ENSG00000240694,ENSG00000276644,ENSG00000136490,ENSG00000176533
FMT	U13	12106	339	339	9.4929	10	1.05342	1.05674	0.479028	ENSG00000154451,ENSG00000241127,ENSG00000091127,ENSG00000164946,ENSG00000198270,ENSG00000166863,ENSG00000206053,ENSG00000142494,ENSG00000198026,ENSG00000129951
FMT	U15	12106	339	421	11.7891	5	0.42412	0.408495	0.992619	ENSG00000082068,ENSG00000161048,ENSG00000105989,ENSG00000137672,ENSG00000177106
FMT	U17	12106	339	541	15.1494	15	0.990136	0.989386	0.553878	ENSG00000213088,ENSG00000116731,ENSG00000001617,ENSG00000185305,ENSG00000188428,ENSG00000147231,ENSG00000106771,ENSG00000136830,ENSG00000136870,ENSG00000149269,ENSG00000149716,ENSG00000185736,ENSG00000178502,ENSG00000100138,ENSG00000215193
FMT	U18	12106	339	102	2.85627	2	0.700214	0.69242	0.783918	ENSG00000076716,ENSG00000108352
FMT	U19	12106	339	291	8.14877	5	0.61359	0.600962	0.91429	ENSG00000116741,ENSG00000163491,ENSG00000138678,ENSG00000121073,ENSG00000100097
FMT	U20	12106	339	252	7.05667	10	1.4171	1.44746	0.170281	ENSG00000143409,ENSG00000109787,ENSG00000145246,ENSG00000137628,ENSG00000215217,ENSG00000165168,ENSG00000196422,ENSG00000197748,ENSG00000156042,ENSG00000187905
FMT	U22	12106	339	134	3.75235	4	1.066	1.0688	0.519773	ENSG00000138439,ENSG00000169855,ENSG00000110756,ENSG00000227051
FMT	U23	12106	339	127	3.55634	4	1.12475	1.13034	0.477767	ENSG00000138496,ENSG00000129009,ENSG00000176170,ENSG00000173821
FMT	U24	12106	339	194	5.43251	3	0.552231	0.541154	0.912224	ENSG00000123213,ENSG00000145569,ENSG00000106991
FMT	U25	12106	339	288	8.06476	10	1.23996	1.25612	0.288281	ENSG00000003137,ENSG00000163527,ENSG00000024862,ENSG00000204052,ENSG00000061337,ENSG00000136895,ENSG00000139990,ENSG00000119723,ENSG00000213928,ENSG00000124225
FMT	U26	12106	339	285	7.98075	6	0.751809	0.741915	0.814139	ENSG00000137098,ENSG00000140090,ENSG00000183648,ENSG00000172809,ENSG00000130287,ENSG00000167065
FMT	U27	12106	339	318	8.90484	16	1.79678	1.88045	0.0173224	ENSG00000188643,ENSG00000160685,ENSG00000196872,ENSG00000171848,ENSG00000161217,ENSG00000154928,ENSG00000044115,ENSG00000137221,ENSG00000164889,ENSG00000130429,ENSG00000130055,ENSG00000135052,ENSG00000166091,ENSG00000129250,ENSG00000275832,ENSG00000101265
FMT	U28	12106	339	55	1.54015	0	0	0	1
FMT	U29	12106	339	240	6.72063	4	0.595182	0.58342	0.907874	ENSG00000143748,ENSG00000159588,ENSG00000141012,ENSG00000132623
FMT	U30	12106	339	297	8.31679	3	0.360716	0.348446	0.990624	ENSG00000156959,ENSG00000168453,ENSG00000141560
FMT	U33	12106	339	67	1.87618	3	1.599	1.63258	0.28924	ENSG00000100433,ENSG00000161298,ENSG00000198355
FMT	U34	12106	339	140	3.92037	2	0.510156	0.500125	0.906895	ENSG00000162706,ENSG00000174145
FMT	U35	12106	339	113	3.1643	2	0.632052	0.623216	0.829509	ENSG00000164187,ENSG00000177125
FMT	U36	12106	339	106	2.96828	2	0.673791	0.665561	0.801614	ENSG00000091664,ENSG00000135457
FMT	U37	12106	339	85	2.38022	4	1.68051	1.72254	0.214814	ENSG00000263528,ENSG00000163412,ENSG00000106524,ENSG00000130037
FMT	U38	12106	339	149	4.17239	4	0.958682	0.957039	0.603917	ENSG00000123689,ENSG00000123575,ENSG00000120690,ENSG00000181019
FMT	U39	12106	339	54	1.51214	0	0	0	1
FMT	U40	12106	339	114	3.1923	7	2.19278	2.29733	0.0409774	ENSG00000229453,ENSG00000056277,ENSG00000168522,ENSG00000179912,ENSG00000011105,ENSG00000136110,ENSG00000069956
FMT	U41	12106	339	235	6.58062	7	1.06373	1.06703	0.48828	ENSG00000091106,ENSG00000173402,ENSG00000109501,ENSG00000122574,ENSG00000102802,ENSG00000172349,ENSG00000130475
FMT	U42	12106	339	62	1.73616	7	4.03188	4.48862	0.00166307	ENSG00000153558,ENSG00000163520,ENSG00000124721,ENSG00000103154,ENSG00000108641,ENSG00000089195,ENSG00000177663
FMT	U43	12106	339	118	3.30431	2	0.60527	0.596099	0.847222	ENSG00000122008,ENSG00000100413
FMT	U44	12106	339	238	6.66463	9	1.35041	1.37406	0.224299	ENSG00000121957,ENSG00000143479,ENSG00000196639,ENSG00000036672,ENSG00000168807,ENSG00000167515,ENSG00000102934,ENSG00000078804,ENSG00000104967
FMT	U45	12106	339	168	4.70444	6	1.27539	1.2907	0.331184	ENSG00000057252,ENSG00000157856,ENSG00000144468,ENSG00000173905,ENSG00000135046,ENSG00000165568
FMT	U46	12106	339	144	4.03238	1	0.247992	0.240509	0.983668	ENSG00000113387
FMT	U48	12106	339	185	5.18049	4	0.772128	0.764324	0.765605	ENSG00000180801,ENSG00000157240,ENSG00000185532,ENSG00000125850
FMT	U49	12106	339	80	2.24021	3	1.33916	1.35548	0.389139	ENSG00000162461,ENSG00000144407,ENSG00000197894
FMT	U50	12106	339	117	3.27631	4	1.22089	1.23141	0.415554	ENSG00000154027,ENSG00000091428,ENSG00000111615,ENSG00000184922
FMT	U51	12106	339	92	2.57624	1	0.388162	0.379628	0.927416	ENSG00000269964
FMT	U54	12106	339	162	4.53643	12	2.64525	2.84166	0.00200685	ENSG00000083444,ENSG00000116473,ENSG00000169504,ENSG00000172331,ENSG00000085117,ENSG00000175104,ENSG00000010278,ENSG00000173548,ENSG00000068079,ENSG00000006042,ENSG00000099840,ENSG00000167037
FMT	U55	12106	339	97	2.71626	4	1.47262	1.49874	0.2883	ENSG00000180287,ENSG00000099282,ENSG00000073417,ENSG00000102967
FMT	U56	12106	339	60	1.68016	3	1.78555	1.83425	0.236094	ENSG00000058085,ENSG00000117115,ENSG00000143418
FMT	U60	12106	339	350	9.80093	5	0.510156	0.49563	0.970191	ENSG00000162627,ENSG00000170144,ENSG00000120963,ENSG00000104231,ENSG00000090470
FMT	U61	12106	339	119	3.33231	0	0	0	1
FMT	U62	12106	339	95	2.66025	1	0.375904	0.367419	0.933389	ENSG00000102359
FMT	U64	12106	339	63	1.76417	2	1.13368	1.13887	0.530287	ENSG00000173085,ENSG00000110400
FMT	U65	12106	339	83	2.32422	2	0.860504	0.856221	0.67999	ENSG00000179796,ENSG00000222011
FMT	U80	12106	339	416	11.6491	10	0.858435	0.850547	0.733583	ENSG00000116690,ENSG00000157036,ENSG00000129187,ENSG00000155868,ENSG00000197150,ENSG00000185189,ENSG00000129566,ENSG00000256053,ENSG00000188266,ENSG00000085415
FMT	U81	12106	339	163	4.56443	4	0.876341	0.871725	0.673866	ENSG00000178171,ENSG00000173258,ENSG00000166888,ENSG00000108679
FMT	U82	12106	339	129	3.61234	3	0.830486	0.824912	0.704971	ENSG00000144306,ENSG00000146453,ENSG00000164638
FMT	U83	12106	339	86	2.40823	1	0.415243	0.406634	0.913821	ENSG00000146243
FMT	U85	12106	339	263	7.3647	4	0.543132	0.530552	0.939912	ENSG00000186283,ENSG00000196975,ENSG00000158163,ENSG00000165572
FMT	U86	12106	339	55	1.54015	3	1.94787	2.01134	0.199317	ENSG00000146433,ENSG00000080573,ENSG00000104856
FMT	U87	12106	339	94	2.63225	5	1.89952	1.96413	0.123577	ENSG00000174804,ENSG00000140807,ENSG00000109099,ENSG00000108839,ENSG00000105717
FMT	U90	12106	339	52	1.45614	2	1.3735	1.39068	0.429901	ENSG00000172426,ENSG00000119509
FMT	U103	12106	339	124	3.47233	4	1.15196	1.15889	0.459337	ENSG00000157510,ENSG00000198729,ENSG00000176715,ENSG00000185262
FMT	U104	12106	339	199	5.57253	4	0.717807	0.708595	0.812691	ENSG00000164035,ENSG00000177830,ENSG00000122367,ENSG00000149600
FMT	U105	12106	339	79	2.21221	3	1.35611	1.37341	0.381518	ENSG00000144648,ENSG00000114779,ENSG00000141349
FMT	U106	12106	339	69	1.93218	1	0.517549	0.509025	0.859894	ENSG00000139880
FMT	U123	12106	339	60	1.68016	3	1.78555	1.83425	0.236094	ENSG00000116918,ENSG00000168811,ENSG00000155511
FMT	U124	12106	339	74	2.0722	2	0.96516	0.963982	0.618001	ENSG00000162998,ENSG00000111218
FMT	U126	12106	339	70	1.96019	4	2.04062	2.11665	0.132577	ENSG00000205279,ENSG00000025039,ENSG00000183166,ENSG00000101230
FMT	U135	12106	339	220	6.16058	3	0.486967	0.475252	0.948635	ENSG00000136518,ENSG00000163673,ENSG00000149577
FMT	U136	12106	339	62	1.73616	2	1.15196	1.15795	0.521665	ENSG00000007944,ENSG00000182718
FMT	U140	12106	339	173	4.84446	1	0.206421	0.19946	0.992912	ENSG00000170632
FMT	U141	12106	339	117	3.27631	3	0.915664	0.912679	0.640713	ENSG00000066322,ENSG00000106070,ENSG00000184867
FMT	U142	12106	339	97	2.71626	7	2.57708	2.73505	0.0190097	ENSG00000163482,ENSG00000186352,ENSG00000204264,ENSG00000168394,ENSG00000096092,ENSG00000181234,ENSG00000089154
FMT	U145	12106	339	80	2.24021	7	3.12471	3.3769	0.00701048	ENSG00000135926,ENSG00000204580,ENSG00000176485,ENSG00000166387,ENSG00000066468,ENSG00000111266,ENSG00000100418
FMT	U149	12106	339	68	1.90418	2	1.05032	1.05217	0.57179	ENSG00000153237,ENSG00000044524
FMT	U150	12106	339	121	3.38832	4	1.18053	1.18891	0.440691	ENSG00000146072,ENSG00000130368,ENSG00000169398,ENSG00000214050
FMT	U156	12106	339	58	1.62415	3	1.84712	1.90119	0.221228	ENSG00000197852,ENSG00000152413,ENSG00000176533
FMT	U160	12106	339	196	5.48852	3	0.546596	0.535453	0.915696	ENSG00000166863,ENSG00000198026,ENSG00000129951
FMT	U161	12106	339	62	1.73616	1	0.575982	0.567775	0.828891	ENSG00000241127
FMT	U162	12106	339	50	1.40013	5	3.57109	3.8988	0.0126303	ENSG00000154451,ENSG00000091127,ENSG00000164946,ENSG00000198270,ENSG00000142494
FMT	U164	12106	339	69	1.93218	1	0.517549	0.509025	0.859894	ENSG00000082068
FMT	U166	12106	339	74	2.0722	0	0	0	1
FMT	U167	12106	339	60	1.68016	0	0	0	1
FMT	U168	12106	339	58	1.62415	0	0	0	1
FMT	U176	12106	339	119	3.33231	3	0.900275	0.89679	0.652067	ENSG00000178502,ENSG00000100138,ENSG00000215193
FMT	U180	12106	339	79	2.21221	1	0.452037	0.443391	0.894721	ENSG00000147231
FMT	U182	12106	339	53	1.48414	4	2.69516	2.855	0.0605874	ENSG00000116731,ENSG00000188428,ENSG00000106771,ENSG00000149716
FMT	U194	12106	339	58	1.62415	2	1.23141	1.24107	0.486138	ENSG00000163491,ENSG00000121073
FMT	U198	12106	339	96	2.68825	1	0.371989	0.36352	0.935269	ENSG00000100097
FMT	U202	12106	339	58	1.62415	2	1.23141	1.24107	0.486138	ENSG00000145246,ENSG00000137628
FMT	U203	12106	339	109	3.05229	5	1.63812	1.67871	0.190509	ENSG00000109787,ENSG00000215217,ENSG00000165168,ENSG00000196422,ENSG00000156042
FMT	U206	12106	339	58	1.62415	2	1.23141	1.24107	0.486138	ENSG00000169855,ENSG00000227051
FMT	U211	12106	339	65	1.82017	2	1.0988	1.10253	0.547212	ENSG00000129009,ENSG00000173821
FMT	U223	12106	339	67	1.87618	2	1.066	1.0684	0.563706	ENSG00000024862,ENSG00000139990
FMT	U238	12106	339	60	1.68016	2	1.19036	1.19808	0.504107	ENSG00000137098,ENSG00000140090
FMT	U240	12106	339	52	1.45614	2	1.3735	1.39068	0.429901	ENSG00000172809,ENSG00000130287
FMT	U265	12106	339	81	2.26821	1	0.440875	0.432232	0.900572	ENSG00000132623
FMT	U266	12106	339	56	1.56815	0	0	0	1
FMT	U267	12106	339	61	1.70816	2	1.17085	1.17767	0.512938	ENSG00000143748,ENSG00000159588
FMT	U270	12106	339	62	1.73616	1	0.575982	0.567775	0.828891	ENSG00000156959
FMT	U294	12106	339	54	1.51214	0	0	0	1
FMT	U309	12106	339	70	1.96019	2	1.02031	1.02104	0.587632	ENSG00000091664,ENSG00000135457
FMT	U321	12106	339	54	1.51214	3	1.98394	2.05093	0.192133	ENSG00000056277,ENSG00000011105,ENSG00000069956
FMT	U322	12106	339	52	1.45614	4	2.74699	2.91471	0.0572215	ENSG00000229453,ENSG00000168522,ENSG00000179912,ENSG00000136110
FMT	U324	12106	339	84	2.35222	2	0.85026	0.845708	0.686347	ENSG00000091106,ENSG00000109501
FMT	U325	12106	339	101	2.82827	2	0.707147	0.699473	0.779283	ENSG00000173402,ENSG00000130475
FMT	U328	12106	339	50	1.40013	4	2.85687	3.04192	0.0508008	ENSG00000103154,ENSG00000108641,ENSG00000089195,ENSG00000177663
FMT	U331	12106	339	57	1.59615	1	0.626507	0.618731	0.802642	ENSG00000122008
FMT	U336	12106	339	50	1.40013	3	2.14265	2.22629	0.164123	ENSG00000196639,ENSG00000168807,ENSG00000104967
FMT	U338	12106	339	62	1.73616	3	1.72795	1.77168	0.251127	ENSG00000143479,ENSG00000102934,ENSG00000078804
FMT	U340	12106	339	54	1.51214	1	0.661313	0.653919	0.785004	ENSG00000036672
FMT	U362	12106	339	95	2.66025	3	1.12771	1.13304	0.499535	ENSG00000180801,ENSG00000157240,ENSG00000185532
FMT	U363	12106	339	69	1.93218	1	0.517549	0.509025	0.859894	ENSG00000125850
FMT	U387	12106	339	114	3.1923	2	0.626507	0.617599	0.833193	ENSG00000085117,ENSG00000167037
FMT	U392	12106	339	58	1.62415	1	0.615705	0.607825	0.808195	ENSG00000073417
FMT	U401	12106	339	173	4.84446	4	0.825686	0.819441	0.718332	ENSG00000170144,ENSG00000120963,ENSG00000104231,ENSG00000090470
FMT	U402	12106	339	56	1.56815	0	0	0	1
FMT	U469	12106	339	244	6.83264	6	0.878137	0.872822	0.683381	ENSG00000116690,ENSG00000157036,ENSG00000129187,ENSG00000256053,ENSG00000188266,ENSG00000085415
FMT	U479	12106	339	67	1.87618	2	1.066	1.0684	0.563706	ENSG00000178171,ENSG00000173258
FMT	U550	12106	339	77	2.1562	2	0.927556	0.925189	0.639633	ENSG00000198729,ENSG00000176715
FMT	U553	12106	339	92	2.57624	0	0	0	1
FMT	U565	12106	339	73	2.04419	3	1.46757	1.49188	0.335449	ENSG00000144648,ENSG00000114779,ENSG00000141349
FMT	U567	12106	339	56	1.56815	1	0.637695	0.630034	0.796929	ENSG00000139880
FMT	U621	12106	339	90	2.52024	0	0	0	1
FMT	U622	12106	339	50	1.40013	0	0	0	1
FMT	U638	12106	339	60	1.68016	0	0	0	1
FMT	U640	12106	339	81	2.26821	0	0	0	1
FMT	U643	12106	339	69	1.93218	2	1.0351	1.03637	0.579766	ENSG00000066322,ENSG00000184867
FMT	U648	12106	339	56	1.56815	3	1.91308	1.97323	0.206563	ENSG00000163482,ENSG00000186352,ENSG00000089154
FMT	U658	12106	339	63	1.76417	7	3.96788	4.40796	0.00182694	ENSG00000135926,ENSG00000204580,ENSG00000176485,ENSG00000166387,ENSG00000066468,ENSG00000111266,ENSG00000100418
FMT	U668	12106	339	56	1.56815	2	1.27539	1.28725	0.467771	ENSG00000169398,ENSG00000214050
FMT	U692	12106	339	121	3.38832	2	0.590263	0.580922	0.857033	ENSG00000198026,ENSG00000129951
FMT	U752	12106	339	55	1.54015	1	0.649289	0.641755	0.791051	ENSG00000147231
FMT	U815	12106	339	52	1.45614	2	1.3735	1.39068	0.429901	ENSG00000169855,ENSG00000227051
FMT	U864	12106	339	50	1.40013	1	0.714218	0.707539	0.759018	ENSG00000140090
FMT	U914	12106	339	62	1.73616	1	0.575982	0.567775	0.828891	ENSG00000132623
FMT	U923	12106	339	58	1.62415	1	0.615705	0.607825	0.808195	ENSG00000156959
FMT	U990	12106	339	89	2.49224	1	0.401246	0.392671	0.920909	ENSG00000130475
FMT	U1097	12106	339	79	2.21221	1	0.452037	0.443391	0.894721	ENSG00000104231
FMT	U1127	12106	339	132	3.69635	3	0.811612	0.805521	0.719593	ENSG00000116690,ENSG00000157036,ENSG00000188266
FMT	U1300	12106	339	58	1.62415	7	4.30994	4.84245	0.00111845	ENSG00000135926,ENSG00000204580,ENSG00000176485,ENSG00000166387,ENSG00000066468,ENSG00000111266,ENSG00000100418
FMT	U1320	12106	339	57	1.59615	1	0.626507	0.618731	0.802642	ENSG00000198026
FMT	U1413	12106	339	52	1.45614	1	0.686748	0.679678	0.77238	ENSG00000132623
CSDS	U2	12106	334	422	11.6428	9	0.773008	0.761648	0.828598	ENSG00000164303,ENSG00000137106,ENSG00000139263,ENSG00000171877,ENSG00000158486,ENSG00000120088,ENSG00000172264,ENSG00000214456,ENSG00000142149
CSDS	U3	12106	334	1029	28.3897	14	0.493136	0.463685	0.999393	ENSG00000163875,ENSG00000002587,ENSG00000152784,ENSG00000113100,ENSG00000180822,ENSG00000082556,ENSG00000153714,ENSG00000137054,ENSG00000137726,ENSG00000154134,ENSG00000010626,ENSG00000131979,ENSG00000103365,ENSG00000166851
CSDS	U5	12106	334	1682	46.4057	31	0.668021	0.627207	0.996241	ENSG00000050628,ENSG00000225556,ENSG00000116981,ENSG00000023902,ENSG00000144331,ENSG00000138433,ENSG00000114450,ENSG00000156990,ENSG00000164466,ENSG00000170085,ENSG00000112977,ENSG00000137273,ENSG00000153046,ENSG00000203760,ENSG00000214309,ENSG00000160957,ENSG00000148057,ENSG00000130653,ENSG00000173258,ENSG00000235453,ENSG00000170743,ENSG00000149554,ENSG00000166317,ENSG00000135124,ENSG00000132975…
CSDS	U6	12106	334	838	23.1201	25	1.08131	1.09055	0.371276	ENSG00000158292,ENSG00000155380,ENSG00000187608,ENSG00000137965,ENSG00000160678,ENSG00000060718,ENSG00000152056,ENSG00000155893,ENSG00000136059,ENSG00000174839,ENSG00000185149,ENSG00000157510,ENSG00000170234,ENSG00000204618,ENSG00000164690,ENSG00000012211,ENSG00000123901,ENSG00000048540,ENSG00000076248,ENSG00000203485,ENSG00000174628,ENSG00000108798,ENSG00000141526,ENSG00000125843,ENSG00000105559
CSDS	U7	12106	334	385	10.622	33	3.10676	3.55601	6.9304e-09	ENSG00000134247,ENSG00000162630,ENSG00000163399,ENSG00000180875,ENSG00000117152,ENSG00000157851,ENSG00000150551,ENSG00000163072,ENSG00000115194,ENSG00000162998,ENSG00000153253,ENSG00000154764,ENSG00000121440,ENSG00000176597,ENSG00000145014,ENSG00000131386,ENSG00000168724,ENSG00000112276,ENSG00000091831,ENSG00000130052,ENSG00000125355,ENSG00000008513,ENSG00000174417,ENSG00000139044,ENSG00000240771…
CSDS	U8	12106	334	366	10.0978	17	1.68353	1.75516	0.0253873	ENSG00000137962,ENSG00000069702,ENSG00000116962,ENSG00000106080,ENSG00000158813,ENSG00000130962,ENSG00000204291,ENSG00000185585,ENSG00000107796,ENSG00000165633,ENSG00000111653,ENSG00000184575,ENSG00000127329,ENSG00000111602,ENSG00000140092,ENSG00000159792,ENSG00000154856
CSDS	U9	12106	334	453	12.4981	12	0.960146	0.957539	0.599418	ENSG00000157184,ENSG00000138449,ENSG00000084093,ENSG00000170624,ENSG00000087842,ENSG00000268089,ENSG00000156675,ENSG00000122140,ENSG00000148690,ENSG00000131480,ENSG00000198046,ENSG00000177692
CSDS	U10	12106	334	193	5.3248	1	0.187801	0.181125	0.995676	ENSG00000111581
CSDS	U11	12106	334	290	8.00099	17	2.12474	2.25875	0.00286382	ENSG00000134207,ENSG00000177519,ENSG00000144229,ENSG00000044524,ENSG00000127241,ENSG00000179097,ENSG00000091490,ENSG00000113657,ENSG00000146250,ENSG00000135318,ENSG00000137573,ENSG00000155926,ENSG00000147655,ENSG00000154188,ENSG00000262655,ENSG00000183020,ENSG00000171246
CSDS	U12	12106	334	159	4.38675	11	2.50755	2.67427	0.00458692	ENSG00000168702,ENSG00000157093,ENSG00000173376,ENSG00000138653,ENSG00000145358,ENSG00000155858,ENSG00000124785,ENSG00000147246,ENSG00000147862,ENSG00000171873,ENSG00000176533
CSDS	U13	12106	334	339	9.35288	10	1.06919	1.07346	0.460233	ENSG00000126091,ENSG00000182179,ENSG00000114115,ENSG00000154548,ENSG00000275074,ENSG00000147606,ENSG00000164946,ENSG00000043591,ENSG00000206053,ENSG00000185838
CSDS	U15	12106	334	421	11.6152	9	0.774845	0.763564	0.826559	ENSG00000142910,ENSG00000184845,ENSG00000112514,ENSG00000104549,ENSG00000135002,ENSG00000137507,ENSG00000148600,ENSG00000165899,ENSG00000139405
CSDS	U17	12106	334	541	14.926	12	0.803967	0.792055	0.820024	ENSG00000198216,ENSG00000144476,ENSG00000134321,ENSG00000131711,ENSG00000145934,ENSG00000198846,ENSG00000183117,ENSG00000137100,ENSG00000005810,ENSG00000165821,ENSG00000101624,ENSG00000104983
CSDS	U18	12106	334	102	2.81414	3	1.06604	1.06863	0.537418	ENSG00000197410,ENSG00000076716,ENSG00000151067
CSDS	U19	12106	334	291	8.02858	5	0.622775	0.610361	0.90785	ENSG00000091137,ENSG00000166261,ENSG00000100578,ENSG00000196867,ENSG00000161270
CSDS	U20	12106	334	252	6.95259	8	1.15065	1.15939	0.393987	ENSG00000204767,ENSG00000105866,ENSG00000122591,ENSG00000148123,ENSG00000188316,ENSG00000171451,ENSG00000100116,ENSG00000187905
CSDS	U22	12106	334	134	3.69701	6	1.62293	1.66396	0.165796	ENSG00000162878,ENSG00000070882,ENSG00000107186,ENSG00000133116,ENSG00000227051,ENSG00000166750
CSDS	U23	12106	334	127	3.50388	9	2.56858	2.73458	0.00853697	ENSG00000049323,ENSG00000132170,ENSG00000213949,ENSG00000145623,ENSG00000164823,ENSG00000173848,ENSG00000102755,ENSG00000101335,ENSG00000101353
CSDS	U24	12106	334	194	5.35239	6	1.121	1.12713	0.446935	ENSG00000150630,ENSG00000153975,ENSG00000122585,ENSG00000177374,ENSG00000101040,ENSG00000101391
CSDS	U25	12106	334	288	7.94581	9	1.13267	1.14073	0.399627	ENSG00000164082,ENSG00000172403,ENSG00000171159,ENSG00000187486,ENSG00000161835,ENSG00000138623,ENSG00000276023,ENSG00000136449,ENSG00000105088
CSDS	U26	12106	334	285	7.86304	7	0.890241	0.885076	0.675705	ENSG00000171819,ENSG00000144868,ENSG00000157014,ENSG00000146221,ENSG00000151208,ENSG00000072041,ENSG00000006283
CSDS	U27	12106	334	318	8.7735	5	0.569898	0.5564	0.941764	ENSG00000111834,ENSG00000164619,ENSG00000122863,ENSG00000138182,ENSG00000205336
CSDS	U28	12106	334	55	1.51743	2	1.31802	1.33197	0.450774	ENSG00000135740,ENSG00000167077
CSDS	U29	12106	334	240	6.62151	5	0.755115	0.746117	0.79628	ENSG00000129159,ENSG00000198056,ENSG00000183655,ENSG00000103061,ENSG00000028277
CSDS	U30	12106	334	297	8.19412	7	0.854271	0.847568	0.71648	ENSG00000163939,ENSG00000057019,ENSG00000168743,ENSG00000196376,ENSG00000168453,ENSG00000244187,ENSG00000185100
CSDS	U33	12106	334	67	1.8485	1	0.540978	0.532642	0.847362	ENSG00000162734
CSDS	U34	12106	334	140	3.86255	5	1.29448	1.31	0.343748	ENSG00000117643,ENSG00000138413,ENSG00000115267,ENSG00000164167,ENSG00000133794
CSDS	U35	12106	334	113	3.11763	1	0.320757	0.312652	0.958263	ENSG00000145242
CSDS	U36	12106	334	106	2.9245	5	1.70969	1.75604	0.168926	ENSG00000183317,ENSG00000109189,ENSG00000175471,ENSG00000128573,ENSG00000175352
CSDS	U37	12106	334	85	2.34512	2	0.852836	0.848392	0.684696	ENSG00000180354,ENSG00000153993
CSDS	U38	12106	334	149	4.11085	2	0.486517	0.476416	0.920382	ENSG00000103275,ENSG00000168734
CSDS	U39	12106	334	54	1.48984	1	0.671213	0.664021	0.780003	ENSG00000185946
CSDS	U40	12106	334	114	3.14522	5	1.58972	1.62604	0.206832	ENSG00000163359,ENSG00000013441,ENSG00000176018,ENSG00000154146,ENSG00000167281
CSDS	U41	12106	334	235	6.48356	12	1.85083	1.9299	0.029926	ENSG00000163430,ENSG00000112902,ENSG00000135334,ENSG00000112562,ENSG00000111249,ENSG00000122025,ENSG00000152910,ENSG00000198736,ENSG00000161647,ENSG00000166619,ENSG00000125869,ENSG00000101188
CSDS	U42	12106	334	62	1.71056	1	0.584605	0.576546	0.824312	ENSG00000152785
CSDS	U43	12106	334	118	3.25558	1	0.307165	0.299163	0.963761	ENSG00000164597
CSDS	U44	12106	334	238	6.56633	7	1.06604	1.06947	0.485984	ENSG00000143013,ENSG00000182004,ENSG00000143365,ENSG00000146374,ENSG00000175356,ENSG00000100346,ENSG00000154645
CSDS	U45	12106	334	168	4.63506	7	1.51023	1.54372	0.182745	ENSG00000162692,ENSG00000134250,ENSG00000214021,ENSG00000111817,ENSG00000188153,ENSG00000103175,ENSG00000170412
CSDS	U46	12106	334	144	3.97291	2	0.50341	0.4934	0.910795	ENSG00000117475,ENSG00000086300
CSDS	U48	12106	334	185	5.10408	4	0.783687	0.776239	0.755403	ENSG00000121210,ENSG00000153233,ENSG00000136040,ENSG00000180185
CSDS	U49	12106	334	80	2.20717	0	0	0	1
CSDS	U50	12106	334	117	3.22799	0	0	0	1
CSDS	U51	12106	334	92	2.53825	2	0.787946	0.781941	0.725933	ENSG00000159788,ENSG00000082397
CSDS	U54	12106	334	162	4.46952	3	0.671213	0.661989	0.82878	ENSG00000164303,ENSG00000137106,ENSG00000172264
CSDS	U55	12106	334	97	2.67619	2	0.74733	0.740471	0.752524	ENSG00000171877,ENSG00000214456
CSDS	U56	12106	334	60	1.65538	0	0	0	1
CSDS	U60	12106	334	350	9.65637	3	0.310676	0.298433	0.996943	ENSG00000180822,ENSG00000137054,ENSG00000166851
CSDS	U61	12106	334	119	3.28317	0	0	0	1
CSDS	U62	12106	334	95	2.62101	2	0.763063	0.756524	0.742164	ENSG00000152784,ENSG00000103365
CSDS	U64	12106	334	63	1.73815	0	0	0	1
CSDS	U65	12106	334	83	2.28994	0	0	0	1
CSDS	U80	12106	334	416	11.4773	3	0.261386	0.249294	0.999372	ENSG00000050628,ENSG00000153046,ENSG00000166317
CSDS	U81	12106	334	163	4.49711	3	0.667095	0.657796	0.831898	ENSG00000116981,ENSG00000173258,ENSG00000153885
CSDS	U82	12106	334	129	3.55906	7	1.96681	2.04393	0.0661529	ENSG00000170085,ENSG00000137273,ENSG00000214309,ENSG00000148057,ENSG00000149554,ENSG00000181045,ENSG00000130589
CSDS	U83	12106	334	86	2.37271	3	1.26438	1.27639	0.424835	ENSG00000225556,ENSG00000138433,ENSG00000135124
CSDS	U85	12106	334	263	7.25607	5	0.689078	0.67825	0.855686	ENSG00000114450,ENSG00000156990,ENSG00000112977,ENSG00000140044,ENSG00000181291
CSDS	U86	12106	334	55	1.51743	1	0.659009	0.651669	0.7861	ENSG00000176920
CSDS	U87	12106	334	94	2.59342	1	0.385591	0.377139	0.928651	ENSG00000235453
CSDS	U90	12106	334	52	1.43466	0	0	0	1
CSDS	U103	12106	334	124	3.42111	3	0.876907	0.872721	0.669504	ENSG00000187608,ENSG00000060718,ENSG00000157510
CSDS	U104	12106	334	199	5.49034	5	0.910691	0.907004	0.646154	ENSG00000152056,ENSG00000076248,ENSG00000203485,ENSG00000174628,ENSG00000125843
CSDS	U105	12106	334	79	2.17958	3	1.37641	1.39475	0.372604	ENSG00000155893,ENSG00000170234,ENSG00000141526
CSDS	U106	12106	334	69	1.90368	5	2.62649	2.7798	0.0415174	ENSG00000158292,ENSG00000137965,ENSG00000164690,ENSG00000108798,ENSG00000105559
CSDS	U123	12106	334	60	1.65538	5	3.02046	3.23704	0.0245865	ENSG00000180875,ENSG00000150551,ENSG00000154764,ENSG00000235711,ENSG00000123700
CSDS	U124	12106	334	74	2.04163	8	3.91843	4.35138	0.000953957	ENSG00000162630,ENSG00000163399,ENSG00000117152,ENSG00000115194,ENSG00000162998,ENSG00000168724,ENSG00000112276,ENSG00000154975
CSDS	U126	12106	334	70	1.93127	7	3.62455	3.97776	0.00308733	ENSG00000134247,ENSG00000121440,ENSG00000145014,ENSG00000131386,ENSG00000130052,ENSG00000254585,ENSG00000105048
CSDS	U135	12106	334	220	6.06972	11	1.81228	1.88405	0.0416964	ENSG00000137962,ENSG00000069702,ENSG00000116962,ENSG00000204291,ENSG00000185585,ENSG00000107796,ENSG00000111653,ENSG00000184575,ENSG00000127329,ENSG00000159792,ENSG00000154856
CSDS	U136	12106	334	62	1.71056	3	1.75381	1.79917	0.244249	ENSG00000165633,ENSG00000111602,ENSG00000140092
CSDS	U140	12106	334	173	4.77301	4	0.838046	0.832214	0.707398	ENSG00000138449,ENSG00000087842,ENSG00000268089,ENSG00000177692
CSDS	U141	12106	334	117	3.22799	5	1.54895	1.58208	0.221721	ENSG00000157184,ENSG00000084093,ENSG00000156675,ENSG00000122140,ENSG00000131480
CSDS	U142	12106	334	97	2.67619	1	0.373665	0.36526	0.934439	ENSG00000170624
CSDS	U145	12106	334	80	2.20717	0	0	0	1
CSDS	U149	12106	334	68	1.87609	11	5.86324	6.99587	2.24837e-06	ENSG00000134207,ENSG00000177519,ENSG00000144229,ENSG00000044524,ENSG00000127241,ENSG00000179097,ENSG00000146250,ENSG00000135318,ENSG00000137573,ENSG00000155926,ENSG00000171246
CSDS	U150	12106	334	121	3.33834	4	1.1982	1.20744	0.429501	ENSG00000091490,ENSG00000113657,ENSG00000262655,ENSG00000183020
CSDS	U156	12106	334	58	1.6002	4	2.49969	2.62996	0.0756583	ENSG00000124785,ENSG00000147246,ENSG00000147862,ENSG00000176533
CSDS	U160	12106	334	196	5.40757	4	0.739704	0.731075	0.793875	ENSG00000126091,ENSG00000154548,ENSG00000275074,ENSG00000043591
CSDS	U161	12106	334	62	1.71056	0	0	0	1
CSDS	U162	12106	334	50	1.37948	5	3.62455	3.95967	0.011902	ENSG00000182179,ENSG00000114115,ENSG00000147606,ENSG00000164946,ENSG00000185838
CSDS	U164	12106	334	69	1.90368	0	0	0	1
CSDS	U166	12106	334	74	2.04163	1	0.489804	0.481283	0.874655	ENSG00000139405
CSDS	U167	12106	334	60	1.65538	1	0.604092	0.596191	0.814148	ENSG00000142910
CSDS	U168	12106	334	58	1.6002	1	0.624923	0.617214	0.803398	ENSG00000165899
CSDS	U176	12106	334	119	3.28317	2	0.609168	0.60011	0.84462	ENSG00000183117,ENSG00000101624
CSDS	U180	12106	334	79	2.17958	2	0.917608	0.914965	0.645431	ENSG00000144476,ENSG00000131711
CSDS	U182	12106	334	53	1.46225	3	2.05163	2.1246	0.179531	ENSG00000145934,ENSG00000198846,ENSG00000104983
CSDS	U194	12106	334	58	1.6002	2	1.24985	1.2603	0.478296	ENSG00000091137,ENSG00000196867
CSDS	U198	12106	334	96	2.6486	2	0.755115	0.748412	0.74739	ENSG00000100578,ENSG00000161270
CSDS	U202	12106	334	58	1.6002	2	1.24985	1.2603	0.478296	ENSG00000188316,ENSG00000100116
CSDS	U203	12106	334	109	3.00727	2	0.665055	0.656756	0.807423	ENSG00000105866,ENSG00000148123
CSDS	U206	12106	334	58	1.6002	6	3.74954	4.12193	0.00510559	ENSG00000162878,ENSG00000070882,ENSG00000107186,ENSG00000133116,ENSG00000227051,ENSG00000166750
CSDS	U211	12106	334	65	1.79333	6	3.34574	3.63057	0.00887807	ENSG00000049323,ENSG00000213949,ENSG00000145623,ENSG00000102755,ENSG00000101335,ENSG00000101353
CSDS	U223	12106	334	67	1.8485	4	2.16391	2.25271	0.113389	ENSG00000187486,ENSG00000161835,ENSG00000138623,ENSG00000136449
CSDS	U238	12106	334	60	1.65538	0	0	0	1
CSDS	U240	12106	334	52	1.43466	1	0.697029	0.690177	0.767285	ENSG00000072041
CSDS	U265	12106	334	81	2.23476	3	1.34243	1.35878	0.387647	ENSG00000129159,ENSG00000198056,ENSG00000103061
CSDS	U266	12106	334	56	1.54502	1	0.647241	0.639767	0.792028	ENSG00000028277
CSDS	U267	12106	334	61	1.68297	1	0.594189	0.586205	0.819301	ENSG00000183655
CSDS	U270	12106	334	62	1.71056	0	0	0	1
CSDS	U294	12106	334	54	1.48984	4	2.68485	2.84126	0.0613192	ENSG00000117643,ENSG00000138413,ENSG00000115267,ENSG00000164167
CSDS	U309	12106	334	70	1.93127	5	2.58896	2.73668	0.0437437	ENSG00000183317,ENSG00000109189,ENSG00000175471,ENSG00000128573,ENSG00000175352
CSDS	U321	12106	334	54	1.48984	2	1.34243	1.3577	0.441419	ENSG00000163359,ENSG00000154146
CSDS	U322	12106	334	52	1.43466	2	1.39406	1.41222	0.422451	ENSG00000013441,ENSG00000176018
CSDS	U324	12106	334	84	2.31753	5	2.15747	2.24932	0.0823168	ENSG00000112902,ENSG00000112562,ENSG00000122025,ENSG00000152910,ENSG00000125869
CSDS	U325	12106	334	101	2.78655	4	1.43547	1.45884	0.304159	ENSG00000163430,ENSG00000135334,ENSG00000111249,ENSG00000198736
CSDS	U328	12106	334	50	1.37948	0	0	0	1
CSDS	U331	12106	334	57	1.57261	1	0.635886	0.628289	0.797793	ENSG00000164597
CSDS	U336	12106	334	50	1.37948	4	2.89964	3.08931	0.0485713	ENSG00000143013,ENSG00000146374,ENSG00000175356,ENSG00000154645
CSDS	U338	12106	334	62	1.71056	1	0.584605	0.576546	0.824312	ENSG00000143365
CSDS	U340	12106	334	54	1.48984	0	0	0	1
CSDS	U362	12106	334	95	2.62101	3	1.1446	1.15065	0.489596	ENSG00000153233,ENSG00000136040,ENSG00000180185
CSDS	U363	12106	334	69	1.90368	1	0.525297	0.516889	0.855714	ENSG00000121210
CSDS	U387	12106	334	114	3.14522	2	0.635886	0.627169	0.826917	ENSG00000164303,ENSG00000172264
CSDS	U392	12106	334	58	1.6002	2	1.24985	1.2603	0.478296	ENSG00000171877,ENSG00000214456
CSDS	U401	12106	334	173	4.77301	1	0.209512	0.202542	0.992367	ENSG00000180822
CSDS	U402	12106	334	56	1.54502	0	0	0	1
CSDS	U469	12106	334	244	6.73187	2	0.297094	0.287033	0.991843	ENSG00000050628,ENSG00000153046
CSDS	U479	12106	334	67	1.8485	3	1.62293	1.65794	0.28167	ENSG00000116981,ENSG00000173258,ENSG00000153885
CSDS	U550	12106	334	77	2.1244	2	0.941442	0.939523	0.631512	ENSG00000187608,ENSG00000060718
CSDS	U553	12106	334	92	2.53825	1	0.393973	0.385493	0.924512	ENSG00000174628
CSDS	U565	12106	334	73	2.01404	3	1.48954	1.51505	0.327148	ENSG00000155893,ENSG00000170234,ENSG00000141526
CSDS	U567	12106	334	56	1.54502	4	2.58896	2.73142	0.0682931	ENSG00000158292,ENSG00000164690,ENSG00000108798,ENSG00000105559
CSDS	U621	12106	334	90	2.48307	5	2.01364	2.08939	0.102989	ENSG00000137962,ENSG00000116962,ENSG00000204291,ENSG00000184575,ENSG00000127329
CSDS	U622	12106	334	50	1.37948	4	2.89964	3.08931	0.0485713	ENSG00000069702,ENSG00000185585,ENSG00000159792,ENSG00000154856
CSDS	U638	12106	334	60	1.65538	1	0.604092	0.596191	0.814148	ENSG00000268089
CSDS	U640	12106	334	81	2.23476	1	0.447475	0.43891	0.897079	ENSG00000138449
CSDS	U643	12106	334	69	1.90368	4	2.10119	2.18294	0.122723	ENSG00000157184,ENSG00000084093,ENSG00000156675,ENSG00000131480
CSDS	U648	12106	334	56	1.54502	0	0	0	1
CSDS	U658	12106	334	63	1.73815	0	0	0	1
CSDS	U668	12106	334	56	1.54502	1	0.647241	0.639767	0.792028	ENSG00000091490
CSDS	U692	12106	334	121	3.33834	1	0.29955	0.291609	0.966706	ENSG00000126091
CSDS	U752	12106	334	55	1.51743	1	0.659009	0.651669	0.7861	ENSG00000131711
CSDS	U815	12106	334	52	1.43466	6	4.18217	4.6612	0.00294719	ENSG00000162878,ENSG00000070882,ENSG00000107186,ENSG00000133116,ENSG00000227051,ENSG00000166750
CSDS	U864	12106	334	50	1.37948	0	0	0	1
CSDS	U914	12106	334	62	1.71056	3	1.75381	1.79917	0.244249	ENSG00000129159,ENSG00000198056,ENSG00000103061
CSDS	U923	12106	334	58	1.6002	0	0	0	1
CSDS	U990	12106	334	89	2.45548	3	1.22176	1.23155	0.446775	ENSG00000163430,ENSG00000135334,ENSG00000111249
CSDS	U1097	12106	334	79	2.17958	0	0	0	1
CSDS	U1127	12106	334	132	3.64183	0	0	0	1
CSDS	U1300	12106	334	58	1.6002	0	0	0	1
CSDS	U1320	12106	334	57	1.57261	1	0.635886	0.628289	0.797793	ENSG00000126091
CSDS	U1413	12106	334	52	1.43466	3	2.09109	2.16819	0.172651	ENSG00000129159,ENSG00000198056,ENSG00000103061
CUMS	U2	12106	1535	422	53.5082	10	0.186887	0.161703	1	ENSG00000143815,ENSG00000180198,ENSG00000168280,ENSG00000221955,ENSG00000155792,ENSG00000198680,ENSG00000203867,ENSG00000111231,ENSG00000152229,ENSG00000100147
CUMS	U3	12106	1535	1029	130.474	157	1.20331	1.26722	0.00623867	ENSG00000143158,ENSG00000143171,ENSG00000143641,ENSG00000077254,ENSG00000131238,ENSG00000179403,ENSG00000117410,ENSG00000196517,ENSG00000090621,ENSG00000168653,ENSG00000170385,ENSG00000085831,ENSG00000156875,ENSG00000143819,ENSG00000196189,ENSG00000185860,ENSG00000123472,ENSG00000117598,ENSG00000162976,ENSG00000188542,ENSG00000144362,ENSG00000115738,ENSG00000155636,ENSG00000121964,ENSG00000173163…
CUMS	U5	12106	1535	1682	213.272	176	0.825238	0.779555	0.998834	ENSG00000130766,ENSG00000163155,ENSG00000132763,ENSG00000160097,ENSG00000009780,ENSG00000160781,ENSG00000169291,ENSG00000189410,ENSG00000164002,ENSG00000160712,ENSG00000120942,ENSG00000143919,ENSG00000144331,ENSG00000136560,ENSG00000163273,ENSG00000130414,ENSG00000077232,ENSG00000128694,ENSG00000115295,ENSG00000125611,ENSG00000176732,ENSG00000144233,ENSG00000113916,ENSG00000127249,ENSG00000114450…
CUMS	U6	12106	1535	838	106.256	112	1.05406	1.06732	0.283609	ENSG00000142655,ENSG00000142892,ENSG00000162670,ENSG00000203724,ENSG00000130775,ENSG00000116874,ENSG00000116885,ENSG00000117594,ENSG00000171793,ENSG00000077522,ENSG00000005448,ENSG00000198925,ENSG00000003393,ENSG00000162992,ENSG00000158019,ENSG00000170275,ENSG00000145050,ENSG00000155893,ENSG00000091986,ENSG00000144648,ENSG00000072274,ENSG00000077684,ENSG00000174473,ENSG00000174780,ENSG00000171421…
CUMS	U7	12106	1535	385	48.8167	56	1.14715	1.17868	0.149304	ENSG00000158286,ENSG00000133019,ENSG00000197147,ENSG00000137942,ENSG00000121904,ENSG00000153936,ENSG00000185630,ENSG00000204262,ENSG00000144036,ENSG00000172059,ENSG00000134313,ENSG00000154764,ENSG00000114491,ENSG00000131386,ENSG00000169744,ENSG00000138814,ENSG00000109158,ENSG00000138641,ENSG00000184305,ENSG00000113231,ENSG00000145824,ENSG00000164237,ENSG00000137261,ENSG00000112186,ENSG00000164828…
CUMS	U8	12106	1535	366	46.4076	58	1.2498	1.30846	0.0414336	ENSG00000162618,ENSG00000036549,ENSG00000137962,ENSG00000116774,ENSG00000143458,ENSG00000116962,ENSG00000142798,ENSG00000162733,ENSG00000122417,ENSG00000030419,ENSG00000144426,ENSG00000138080,ENSG00000180044,ENSG00000168386,ENSG00000163673,ENSG00000128052,ENSG00000250722,ENSG00000145685,ENSG00000022355,ENSG00000164402,ENSG00000156475,ENSG00000038274,ENSG00000095015,ENSG00000111860,ENSG00000112837…
CUMS	U9	12106	1535	453	57.4389	84	1.46242	1.60048	0.000178096	ENSG00000171729,ENSG00000121769,ENSG00000116133,ENSG00000075945,ENSG00000197965,ENSG00000172456,ENSG00000088280,ENSG00000159208,ENSG00000240857,ENSG00000198612,ENSG00000138073,ENSG00000163466,ENSG00000214694,ENSG00000163376,ENSG00000163577,ENSG00000178057,ENSG00000144959,ENSG00000114279,ENSG00000163812,ENSG00000145247,ENSG00000084093,ENSG00000138792,ENSG00000186352,ENSG00000109738,ENSG00000124275…
CUMS	U10	12106	1535	193	24.4717	7	0.286044	0.255798	0.999997	ENSG00000272031,ENSG00000198399,ENSG00000001630,ENSG00000135250,ENSG00000134294,ENSG00000090905,ENSG00000154229
CUMS	U11	12106	1535	290	36.771	68	1.84928	2.16067	2.40316e-07	ENSG00000143858,ENSG00000176887,ENSG00000075340,ENSG00000162989,ENSG00000144278,ENSG00000114948,ENSG00000115232,ENSG00000157833,ENSG00000183091,ENSG00000135622,ENSG00000044524,ENSG00000169282,ENSG00000169313,ENSG00000038295,ENSG00000171509,ENSG00000164112,ENSG00000145781,ENSG00000145920,ENSG00000112651,ENSG00000118432,ENSG00000001084,ENSG00000112319,ENSG00000091136,ENSG00000136267,ENSG00000048405…
CUMS	U12	12106	1535	159	20.1607	25	1.24004	1.28951	0.149138	ENSG00000132854,ENSG00000188931,ENSG00000168702,ENSG00000128683,ENSG00000138071,ENSG00000183873,ENSG00000109667,ENSG00000138653,ENSG00000152413,ENSG00000064652,ENSG00000182132,ENSG00000152359,ENSG00000205903,ENSG00000136261,ENSG00000182287,ENSG00000167700,ENSG00000120451,ENSG00000162139,ENSG00000150594,ENSG00000061794,ENSG00000177108,ENSG00000140563,ENSG00000167306,ENSG00000124098,ENSG00000062822
CUMS	U13	12106	1535	339	42.9841	19	0.442024	0.401507	0.999996	ENSG00000143179,ENSG00000154451,ENSG00000162367,ENSG00000134851,ENSG00000178177,ENSG00000261236,ENSG00000106688,ENSG00000119121,ENSG00000164946,ENSG00000106852,ENSG00000054967,ENSG00000048649,ENSG00000107789,ENSG00000134470,ENSG00000065559,ENSG00000172794,ENSG00000178342,ENSG00000054793,ENSG00000167600
CUMS	U15	12106	1535	421	53.3814	62	1.16145	1.19727	0.114418	ENSG00000066056,ENSG00000162755,ENSG00000154511,ENSG00000143368,ENSG00000163344,ENSG00000116717,ENSG00000162981,ENSG00000116096,ENSG00000170035,ENSG00000144152,ENSG00000063660,ENSG00000134115,ENSG00000175193,ENSG00000173540,ENSG00000058262,ENSG00000163453,ENSG00000150627,ENSG00000146005,ENSG00000113161,ENSG00000170469,ENSG00000145675,ENSG00000196230,ENSG00000204498,ENSG00000172209,ENSG00000221838…
CUMS	U17	12106	1535	541	68.597	58	0.845518	0.820186	0.931375	ENSG00000163866,ENSG00000143198,ENSG00000162642,ENSG00000135870,ENSG00000143799,ENSG00000178096,ENSG00000213088,ENSG00000127603,ENSG00000010803,ENSG00000162402,ENSG00000173166,ENSG00000134321,ENSG00000198380,ENSG00000084774,ENSG00000114520,ENSG00000145191,ENSG00000156140,ENSG00000182168,ENSG00000152208,ENSG00000145362,ENSG00000145632,ENSG00000154079,ENSG00000112210,ENSG00000223501,ENSG00000130396…
CUMS	U18	12106	1535	102	12.9333	2	0.15464	0.136619	0.999985	ENSG00000108352,ENSG00000167785
CUMS	U19	12106	1535	291	36.8978	24	0.650445	0.612995	0.993979	ENSG00000116151,ENSG00000171492,ENSG00000242485,ENSG00000154518,ENSG00000163947,ENSG00000175161,ENSG00000144647,ENSG00000151806,ENSG00000151726,ENSG00000029639,ENSG00000133878,ENSG00000174684,ENSG00000110031,ENSG00000198561,ENSG00000062282,ENSG00000177981,ENSG00000253719,ENSG00000111731,ENSG00000151835,ENSG00000042317,ENSG00000074410,ENSG00000004142,ENSG00000125885,ENSG00000133424
CUMS	U20	12106	1535	252	31.9528	16	0.500739	0.461299	0.999688	ENSG00000185278,ENSG00000162591,ENSG00000116701,ENSG00000265491,ENSG00000135638,ENSG00000185477,ENSG00000096060,ENSG00000146373,ENSG00000146729,ENSG00000134531,ENSG00000139679,ENSG00000102710,ENSG00000140694,ENSG00000055483,ENSG00000141279,ENSG00000171451
CUMS	U22	12106	1535	134	16.9907	40	2.35422	2.98176	1.06536e-07	ENSG00000118194,ENSG00000076003,ENSG00000197121,ENSG00000123636,ENSG00000173889,ENSG00000151834,ENSG00000145864,ENSG00000158985,ENSG00000132424,ENSG00000070882,ENSG00000117868,ENSG00000180155,ENSG00000066827,ENSG00000107186,ENSG00000119138,ENSG00000119522,ENSG00000149256,ENSG00000173914,ENSG00000149212,ENSG00000120594,ENSG00000120616,ENSG00000150275,ENSG00000151778,ENSG00000165959,ENSG00000227051…
CUMS	U23	12106	1535	127	16.1032	34	2.11139	2.55164	1.34609e-05	ENSG00000131781,ENSG00000125629,ENSG00000055917,ENSG00000144810,ENSG00000145020,ENSG00000138496,ENSG00000168993,ENSG00000164318,ENSG00000054598,ENSG00000164434,ENSG00000111885,ENSG00000137166,ENSG00000105854,ENSG00000106211,ENSG00000157110,ENSG00000147872,ENSG00000172889,ENSG00000050555,ENSG00000106772,ENSG00000110675,ENSG00000156110,ENSG00000177853,ENSG00000152137,ENSG00000177575,ENSG00000110917…
CUMS	U24	12106	1535	194	24.5985	40	1.62611	1.80973	0.00116245	ENSG00000158006,ENSG00000125945,ENSG00000197785,ENSG00000254685,ENSG00000069424,ENSG00000068784,ENSG00000135951,ENSG00000143870,ENSG00000153561,ENSG00000157500,ENSG00000169379,ENSG00000155903,ENSG00000145423,ENSG00000179387,ENSG00000129116,ENSG00000111880,ENSG00000001036,ENSG00000146151,ENSG00000135164,ENSG00000164548,ENSG00000058404,ENSG00000147162,ENSG00000104671,ENSG00000110172,ENSG00000184524…
CUMS	U25	12106	1535	288	36.5174	48	1.31444	1.38946	0.0277113	ENSG00000065243,ENSG00000177807,ENSG00000121486,ENSG00000116668,ENSG00000169231,ENSG00000197056,ENSG00000160785,ENSG00000120948,ENSG00000136732,ENSG00000115137,ENSG00000128656,ENSG00000088543,ENSG00000138468,ENSG00000114790,ENSG00000163946,ENSG00000083896,ENSG00000197860,ENSG00000145715,ENSG00000113719,ENSG00000164440,ENSG00000146070,ENSG00000030110,ENSG00000160993,ENSG00000106330,ENSG00000067829…
CUMS	U26	12106	1535	285	36.137	29	0.802501	0.775909	0.918932	ENSG00000157193,ENSG00000054116,ENSG00000009307,ENSG00000150540,ENSG00000014641,ENSG00000134317,ENSG00000115306,ENSG00000114770,ENSG00000070087,ENSG00000109390,ENSG00000146221,ENSG00000106105,ENSG00000232119,ENSG00000029993,ENSG00000184672,ENSG00000164919,ENSG00000119318,ENSG00000175376,ENSG00000134825,ENSG00000137720,ENSG00000130779,ENSG00000071537,ENSG00000187720,ENSG00000156968,ENSG00000103335…
CUMS	U27	12106	1535	318	40.3213	27	0.669621	0.632524	0.993277	ENSG00000162396,ENSG00000186364,ENSG00000196872,ENSG00000221823,ENSG00000163964,ENSG00000164054,ENSG00000002549,ENSG00000111961,ENSG00000111834,ENSG00000146733,ENSG00000125675,ENSG00000136888,ENSG00000168010,ENSG00000170242,ENSG00000127314,ENSG00000110906,ENSG00000185650,ENSG00000140553,ENSG00000205336,ENSG00000159713,ENSG00000158805,ENSG00000167900,ENSG00000064601,ENSG00000128245,ENSG00000198832…
CUMS	U28	12106	1535	55	6.97381	16	2.2943	2.84417	0.000960743	ENSG00000160752,ENSG00000117245,ENSG00000182901,ENSG00000119041,ENSG00000168758,ENSG00000112658,ENSG00000102100,ENSG00000165030,ENSG00000188229,ENSG00000150764,ENSG00000182667,ENSG00000166439,ENSG00000182957,ENSG00000156642,ENSG00000179314,ENSG00000125772
CUMS	U29	12106	1535	240	30.4312	12	0.394332	0.357452	0.999983	ENSG00000007923,ENSG00000116455,ENSG00000144218,ENSG00000163584,ENSG00000235863,ENSG00000203877,ENSG00000164603,ENSG00000170027,ENSG00000106263,ENSG00000127870,ENSG00000259207,ENSG00000101336
CUMS	U30	12106	1535	297	37.6586	38	1.00907	1.01066	0.502807	ENSG00000118197,ENSG00000162426,ENSG00000154429,ENSG00000082898,ENSG00000127838,ENSG00000186001,ENSG00000175182,ENSG00000132466,ENSG00000273238,ENSG00000213523,ENSG00000031003,ENSG00000277443,ENSG00000198945,ENSG00000127947,ENSG00000184368,ENSG00000165349,ENSG00000168453,ENSG00000104290,ENSG00000147650,ENSG00000160695,ENSG00000110721,ENSG00000136770,ENSG00000198728,ENSG00000151923,ENSG00000151948…
CUMS	U33	12106	1535	67	8.49537	36	4.2376	8.16285	7.91037e-16	ENSG00000162734,ENSG00000142871,ENSG00000177606,ENSG00000073756,ENSG00000168264,ENSG00000153187,ENSG00000159388,ENSG00000143889,ENSG00000196843,ENSG00000075426,ENSG00000134323,ENSG00000163659,ENSG00000163660,ENSG00000144655,ENSG00000152952,ENSG00000120129,ENSG00000198576,ENSG00000173334,ENSG00000130222,ENSG00000070159,ENSG00000197579,ENSG00000179119,ENSG00000182022,ENSG00000122884,ENSG00000122877…
CUMS	U34	12106	1535	140	17.7515	10	0.563332	0.526681	0.987748	ENSG00000143632,ENSG00000185565,ENSG00000174145,ENSG00000080561,ENSG00000148200,ENSG00000133794,ENSG00000135447,ENSG00000061273,ENSG00000168675,ENSG00000128285
CUMS	U35	12106	1535	113	14.328	4	0.279173	0.250786	0.999817	ENSG00000185129,ENSG00000119396,ENSG00000132612,ENSG00000198356
CUMS	U36	12106	1535	106	13.4404	0	0	0	1
CUMS	U37	12106	1535	85	10.7777	59	5.47426	16.2051	8.05818e-34	ENSG00000135828,ENSG00000117118,ENSG00000116898,ENSG00000163462,ENSG00000116663,ENSG00000196482,ENSG00000171853,ENSG00000159399,ENSG00000169599,ENSG00000115486,ENSG00000163611,ENSG00000178467,ENSG00000188315,ENSG00000153064,ENSG00000138777,ENSG00000164168,ENSG00000138794,ENSG00000178394,ENSG00000132357,ENSG00000153922,ENSG00000183826,ENSG00000164442,ENSG00000135333,ENSG00000180354,ENSG00000106524…
CUMS	U38	12106	1535	149	18.8927	14	0.741027	0.711558	0.913879	ENSG00000054282,ENSG00000066557,ENSG00000144668,ENSG00000206530,ENSG00000114331,ENSG00000090989,ENSG00000151611,ENSG00000136826,ENSG00000166025,ENSG00000110080,ENSG00000110811,ENSG00000197063,ENSG00000277791,ENSG00000128191
CUMS	U39	12106	1535	54	6.84702	32	4.67357	10.2031	6.91785e-16	ENSG00000273274,ENSG00000132780,ENSG00000117616,ENSG00000162616,ENSG00000138411,ENSG00000132323,ENSG00000163902,ENSG00000090520,ENSG00000016864,ENSG00000087008,ENSG00000150712,ENSG00000112339,ENSG00000204681,ENSG00000166997,ENSG00000106344,ENSG00000155660,ENSG00000269556,ENSG00000044574,ENSG00000168439,ENSG00000119946,ENSG00000151743,ENSG00000166006,ENSG00000102580,ENSG00000102786,ENSG00000125863…
CUMS	U40	12106	1535	114	14.4548	11	0.760992	0.733575	0.870835	ENSG00000115963,ENSG00000013441,ENSG00000163882,ENSG00000112739,ENSG00000120256,ENSG00000124641,ENSG00000131089,ENSG00000070018,ENSG00000178235,ENSG00000136110,ENSG00000185624
CUMS	U41	12106	1535	235	29.7972	20	0.671204	0.635895	0.983399	ENSG00000162694,ENSG00000116350,ENSG00000144136,ENSG00000118263,ENSG00000168309,ENSG00000198836,ENSG00000113594,ENSG00000185760,ENSG00000214194,ENSG00000257923,ENSG00000102385,ENSG00000120500,ENSG00000147586,ENSG00000149177,ENSG00000107560,ENSG00000123095,ENSG00000180440,ENSG00000122025,ENSG00000119698,ENSG00000125869
CUMS	U42	12106	1535	62	7.86139	1	0.127204	0.112327	0.999782	ENSG00000163520
CUMS	U43	12106	1535	118	14.962	23	1.53723	1.67735	0.0225522	ENSG00000162576,ENSG00000175066,ENSG00000144840,ENSG00000064692,ENSG00000112855,ENSG00000112130,ENSG00000146918,ENSG00000128602,ENSG00000096968,ENSG00000135365,ENSG00000148572,ENSG00000107938,ENSG00000198408,ENSG00000076067,ENSG00000175183,ENSG00000134291,ENSG00000151849,ENSG00000198690,ENSG00000103363,ENSG00000108599,ENSG00000121060,ENSG00000178691,ENSG00000154727
CUMS	U44	12106	1535	238	30.1776	23	0.762155	0.732723	0.938952	ENSG00000065135,ENSG00000078618,ENSG00000065526,ENSG00000115875,ENSG00000017260,ENSG00000184408,ENSG00000122642,ENSG00000128595,ENSG00000130066,ENSG00000164758,ENSG00000148300,ENSG00000134910,ENSG00000214753,ENSG00000036672,ENSG00000165672,ENSG00000150093,ENSG00000135469,ENSG00000196498,ENSG00000166946,ENSG00000168807,ENSG00000167515,ENSG00000176749,ENSG00000167460
CUMS	U45	12106	1535	168	21.3018	21	0.985831	0.983583	0.563383	ENSG00000076356,ENSG00000152763,ENSG00000122432,ENSG00000119787,ENSG00000115414,ENSG00000003402,ENSG00000115902,ENSG00000071794,ENSG00000163297,ENSG00000197594,ENSG00000152818,ENSG00000188153,ENSG00000147050,ENSG00000204116,ENSG00000110066,ENSG00000157227,ENSG00000140545,ENSG00000140299,ENSG00000141446,ENSG00000101003,ENSG00000100376
CUMS	U46	12106	1535	144	18.2587	11	0.602452	0.566488	0.980588	ENSG00000116459,ENSG00000154174,ENSG00000113758,ENSG00000198663,ENSG00000164631,ENSG00000137055,ENSG00000171160,ENSG00000204842,ENSG00000111237,ENSG00000075043,ENSG00000100320
CUMS	U48	12106	1535	185	23.4574	8	0.341044	0.307672	0.999972	ENSG00000197622,ENSG00000010282,ENSG00000196220,ENSG00000010270,ENSG00000107223,ENSG00000180185,ENSG00000184117,ENSG00000128272
CUMS	U49	12106	1535	80	10.1437	0	0	0	1
CUMS	U50	12106	1535	117	14.8352	11	0.741479	0.71261	0.890806	ENSG00000182134,ENSG00000114480,ENSG00000132405,ENSG00000106605,ENSG00000147548,ENSG00000123384,ENSG00000167548,ENSG00000100478,ENSG00000132613,ENSG00000213246,ENSG00000088247
CUMS	U51	12106	1535	92	11.6653	24	2.05739	2.45303	0.000366081	ENSG00000146463,ENSG00000121310,ENSG00000162849,ENSG00000138430,ENSG00000173559,ENSG00000143933,ENSG00000115310,ENSG00000071205,ENSG00000159788,ENSG00000039139,ENSG00000135312,ENSG00000219607,ENSG00000112578,ENSG00000164684,ENSG00000110367,ENSG00000102531,ENSG00000070269,ENSG00000100554,ENSG00000184254,ENSG00000166263,ENSG00000141404,ENSG00000082397,ENSG00000100362,ENSG00000185658
CUMS	U54	12106	1535	162	20.5411	1	0.048683	0.0421381	1	ENSG00000168280
CUMS	U55	12106	1535	97	12.2993	3	0.243917	0.218274	0.999789	ENSG00000143815,ENSG00000221955,ENSG00000100147
CUMS	U56	12106	1535	60	7.6078	2	0.262888	0.236492	0.9972	ENSG00000155792,ENSG00000111231
CUMS	U60	12106	1535	350	44.3788	47	1.05906	1.07039	0.358491	ENSG00000143158,ENSG00000143171,ENSG00000143641,ENSG00000196189,ENSG00000117598,ENSG00000188542,ENSG00000174748,ENSG00000153130,ENSG00000170088,ENSG00000174695,ENSG00000127184,ENSG00000112981,ENSG00000198780,ENSG00000138829,ENSG00000214113,ENSG00000198755,ENSG00000085662,ENSG00000090263,ENSG00000122565,ENSG00000184831,ENSG00000067992,ENSG00000102144,ENSG00000120533,ENSG00000104691,ENSG00000107372…
CUMS	U61	12106	1535	119	15.0888	0	0	0	1
CUMS	U62	12106	1535	95	12.0457	21	1.74336	1.96748	0.00715346	ENSG00000168653,ENSG00000115738,ENSG00000116005,ENSG00000065518,ENSG00000136521,ENSG00000182552,ENSG00000151247,ENSG00000164332,ENSG00000005022,ENSG00000104320,ENSG00000213593,ENSG00000173915,ENSG00000165637,ENSG00000177889,ENSG00000102760,ENSG00000173141,ENSG00000100567,ENSG00000140382,ENSG00000101654,ENSG00000105552,ENSG00000108107
CUMS	U64	12106	1535	63	7.98819	3	0.375555	0.343068	0.990121	ENSG00000144362,ENSG00000174738,ENSG00000229809
CUMS	U65	12106	1535	83	10.5241	26	2.47052	3.17775	6.66914e-06	ENSG00000077254,ENSG00000117410,ENSG00000196517,ENSG00000090621,ENSG00000185860,ENSG00000173163,ENSG00000164077,ENSG00000196782,ENSG00000183654,ENSG00000113552,ENSG00000086200,ENSG00000120899,ENSG00000171169,ENSG00000117984,ENSG00000165650,ENSG00000111678,ENSG00000151176,ENSG00000119705,ENSG00000185271,ENSG00000137824,ENSG00000174939,ENSG00000108622,ENSG00000108840,ENSG00000074660,ENSG00000105053…
CUMS	U80	12106	1535	416	52.7474	30	0.568748	0.525991	0.999905	ENSG00000163155,ENSG00000160781,ENSG00000189410,ENSG00000128694,ENSG00000125611,ENSG00000176732,ENSG00000196455,ENSG00000232112,ENSG00000151790,ENSG00000113649,ENSG00000164379,ENSG00000161904,ENSG00000204209,ENSG00000002933,ENSG00000071889,ENSG00000129158,ENSG00000132744,ENSG00000184154,ENSG00000170145,ENSG00000077420,ENSG00000175395,ENSG00000128805,ENSG00000089775,ENSG00000186417,ENSG00000179335…
CUMS	U81	12106	1535	163	20.6679	15	0.725765	0.695009	0.933391	ENSG00000132763,ENSG00000164002,ENSG00000160712,ENSG00000164219,ENSG00000178233,ENSG00000124614,ENSG00000102053,ENSG00000006118,ENSG00000110768,ENSG00000111647,ENSG00000100441,ENSG00000140995,ENSG00000188895,ENSG00000161654,ENSG00000177150
CUMS	U82	12106	1535	129	16.3568	17	1.03933	1.04581	0.471843	ENSG00000120942,ENSG00000143919,ENSG00000144233,ENSG00000144559,ENSG00000188848,ENSG00000146094,ENSG00000104365,ENSG00000003987,ENSG00000136807,ENSG00000054148,ENSG00000239306,ENSG00000149554,ENSG00000072401,ENSG00000120833,ENSG00000006062,ENSG00000130589,ENSG00000187266
CUMS	U83	12106	1535	86	10.9045	1	0.0917052	0.0804272	0.999992	ENSG00000163273
CUMS	U85	12106	1535	263	33.3475	19	0.569758	0.530466	0.998535	ENSG00000160097,ENSG00000130414,ENSG00000127249,ENSG00000114450,ENSG00000196542,ENSG00000153012,ENSG00000197948,ENSG00000106819,ENSG00000030066,ENSG00000139292,ENSG00000140044,ENSG00000178802,ENSG00000069966,ENSG00000166192,ENSG00000159579,ENSG00000181291,ENSG00000181027,ENSG00000161888,ENSG00000186866
CUMS	U86	12106	1535	55	6.97381	12	1.72072	1.92909	0.0400786	ENSG00000077232,ENSG00000168237,ENSG00000113812,ENSG00000146433,ENSG00000147316,ENSG00000188312,ENSG00000159884,ENSG00000176248,ENSG00000188997,ENSG00000167566,ENSG00000080573,ENSG00000176920
CUMS	U87	12106	1535	94	11.9189	6	0.503403	0.467485	0.984497	ENSG00000169291,ENSG00000020181,ENSG00000154133,ENSG00000140691,ENSG00000005100,ENSG00000074657
CUMS	U90	12106	1535	52	6.59342	16	2.42666	3.08203	0.000484364	ENSG00000113916,ENSG00000153113,ENSG00000187325,ENSG00000136872,ENSG00000068831,ENSG00000151503,ENSG00000120008,ENSG00000067057,ENSG00000111696,ENSG00000198673,ENSG00000179630,ENSG00000129521,ENSG00000159248,ENSG00000141756,ENSG00000087111,ENSG00000104774
CUMS	U103	12106	1535	124	15.7228	13	0.826826	0.804905	0.807023	ENSG00000116874,ENSG00000170275,ENSG00000145050,ENSG00000164588,ENSG00000149289,ENSG00000175482,ENSG00000259431,ENSG00000103047,ENSG00000103245,ENSG00000167363,ENSG00000167549,ENSG00000011304,ENSG00000184164
CUMS	U104	12106	1535	199	25.2325	26	1.03042	1.03559	0.466812	ENSG00000142655,ENSG00000142892,ENSG00000203724,ENSG00000168685,ENSG00000175449,ENSG00000113211,ENSG00000137275,ENSG00000112365,ENSG00000105810,ENSG00000126733,ENSG00000104497,ENSG00000213930,ENSG00000167333,ENSG00000177830,ENSG00000151023,ENSG00000122367,ENSG00000123352,ENSG00000125375,ENSG00000092148,ENSG00000103319,ENSG00000197943,ENSG00000167740,ENSG00000121058,ENSG00000141582,ENSG00000126457…
CUMS	U105	12106	1535	79	10.0169	28	2.79527	3.83207	1.71815e-07	ENSG00000162670,ENSG00000116885,ENSG00000117594,ENSG00000158019,ENSG00000155893,ENSG00000144648,ENSG00000072274,ENSG00000077684,ENSG00000174473,ENSG00000164211,ENSG00000111859,ENSG00000184465,ENSG00000135537,ENSG00000263001,ENSG00000243279,ENSG00000175305,ENSG00000205002,ENSG00000173825,ENSG00000165832,ENSG00000110911,ENSG00000119703,ENSG00000137764,ENSG00000205937,ENSG00000182963,ENSG00000277972…
CUMS	U106	12106	1535	69	8.74897	3	0.342898	0.311703	0.994858	ENSG00000005448,ENSG00000122512,ENSG00000128298
CUMS	U123	12106	1535	60	7.6078	3	0.394332	0.361227	0.986381	ENSG00000154764,ENSG00000213614,ENSG00000182240
CUMS	U124	12106	1535	74	9.38295	17	1.8118	2.06558	0.00996098	ENSG00000197147,ENSG00000153936,ENSG00000144036,ENSG00000114491,ENSG00000109158,ENSG00000138641,ENSG00000112186,ENSG00000164828,ENSG00000156103,ENSG00000006071,ENSG00000151025,ENSG00000172819,ENSG00000111218,ENSG00000103381,ENSG00000101463,ENSG00000089057,ENSG00000115257
CUMS	U126	12106	1535	70	8.87576	4	0.450665	0.415871	0.982883	ENSG00000131386,ENSG00000169884,ENSG00000100625,ENSG00000100003
CUMS	U135	12106	1535	220	27.8953	41	1.46978	1.59315	0.00688454	ENSG00000162618,ENSG00000036549,ENSG00000137962,ENSG00000116774,ENSG00000143458,ENSG00000116962,ENSG00000162733,ENSG00000030419,ENSG00000144426,ENSG00000138080,ENSG00000180044,ENSG00000168386,ENSG00000163673,ENSG00000128052,ENSG00000250722,ENSG00000145685,ENSG00000022355,ENSG00000164402,ENSG00000156475,ENSG00000095015,ENSG00000111860,ENSG00000112837,ENSG00000049540,ENSG00000122786,ENSG00000078596…
CUMS	U136	12106	1535	62	7.86139	4	0.508816	0.473592	0.963324	ENSG00000142798,ENSG00000182985,ENSG00000139174,ENSG00000140092
CUMS	U140	12106	1535	173	21.9358	27	1.23086	1.27843	0.1471	ENSG00000121769,ENSG00000116133,ENSG00000172456,ENSG00000198612,ENSG00000163466,ENSG00000145721,ENSG00000135077,ENSG00000112146,ENSG00000196636,ENSG00000006625,ENSG00000165775,ENSG00000185985,ENSG00000268089,ENSG00000166788,ENSG00000107758,ENSG00000174233,ENSG00000089094,ENSG00000153443,ENSG00000169592,ENSG00000102897,ENSG00000167962,ENSG00000169718,ENSG00000131467,ENSG00000231824,ENSG00000008441…
CUMS	U141	12106	1535	117	14.8352	11	0.741479	0.71261	0.890806	ENSG00000171729,ENSG00000088280,ENSG00000214694,ENSG00000163376,ENSG00000084093,ENSG00000124275,ENSG00000049860,ENSG00000160401,ENSG00000073712,ENSG00000167858,ENSG00000100206
CUMS	U142	12106	1535	97	12.2993	12	0.975667	0.972014	0.582649	ENSG00000240857,ENSG00000138073,ENSG00000178057,ENSG00000145247,ENSG00000138792,ENSG00000186352,ENSG00000170624,ENSG00000198937,ENSG00000204264,ENSG00000172803,ENSG00000128965,ENSG00000100271
CUMS	U145	12106	1535	80	10.1437	3	0.295749	0.266896	0.998496	ENSG00000001630,ENSG00000134294,ENSG00000154229
CUMS	U149	12106	1535	68	8.62217	1	0.11598	0.102209	0.999904	ENSG00000044524
CUMS	U150	12106	1535	121	15.3424	15	0.977683	0.974274	0.578839	ENSG00000075340,ENSG00000144278,ENSG00000115232,ENSG00000169313,ENSG00000136267,ENSG00000179542,ENSG00000156687,ENSG00000107249,ENSG00000172671,ENSG00000187778,ENSG00000173991,ENSG00000081138,ENSG00000219438,ENSG00000160191,ENSG00000180530
CUMS	U156	12106	1535	58	7.3542	5	0.679883	0.648559	0.874779	ENSG00000152413,ENSG00000182132,ENSG00000182287,ENSG00000124098,ENSG00000062822
CUMS	U160	12106	1535	196	24.8521	9	0.362142	0.327519	0.999967	ENSG00000143179,ENSG00000134851,ENSG00000261236,ENSG00000106852,ENSG00000054967,ENSG00000107789,ENSG00000134470,ENSG00000172794,ENSG00000178342
CUMS	U161	12106	1535	62	7.86139	2	0.254408	0.228566	0.997804	ENSG00000054793,ENSG00000167600
CUMS	U162	12106	1535	50	6.33983	8	1.26186	1.31334	0.296821	ENSG00000154451,ENSG00000162367,ENSG00000178177,ENSG00000106688,ENSG00000119121,ENSG00000164946,ENSG00000048649,ENSG00000065559
CUMS	U164	12106	1535	69	8.74897	4	0.457197	0.422309	0.981137	ENSG00000170469,ENSG00000204498,ENSG00000130810,ENSG00000221983
CUMS	U166	12106	1535	74	9.38295	17	1.8118	2.06558	0.00996098	ENSG00000163344,ENSG00000116096,ENSG00000134115,ENSG00000173540,ENSG00000150627,ENSG00000145675,ENSG00000172209,ENSG00000090266,ENSG00000174469,ENSG00000086102,ENSG00000198382,ENSG00000110711,ENSG00000166598,ENSG00000110851,ENSG00000139405,ENSG00000139793,ENSG00000198931
CUMS	U167	12106	1535	60	7.6078	9	1.183	1.21654	0.348671	ENSG00000066056,ENSG00000154511,ENSG00000063660,ENSG00000196230,ENSG00000066629,ENSG00000140280,ENSG00000123146,ENSG00000090013,ENSG00000100345
CUMS	U168	12106	1535	58	7.3542	6	0.81586	0.793821	0.761127	ENSG00000143368,ENSG00000116717,ENSG00000111641,ENSG00000166477,ENSG00000178971,ENSG00000186868
CUMS	U176	12106	1535	119	15.0888	5	0.331372	0.299784	0.999574	ENSG00000163866,ENSG00000173166,ENSG00000182168,ENSG00000189043,ENSG00000147408
CUMS	U180	12106	1535	79	10.0169	8	0.798648	0.774801	0.80038	ENSG00000143198,ENSG00000145362,ENSG00000176428,ENSG00000165629,ENSG00000125821,ENSG00000042753,ENSG00000130725,ENSG00000100142
CUMS	U182	12106	1535	53	6.72022	2	0.297609	0.26913	0.993497	ENSG00000178096,ENSG00000114520
CUMS	U194	12106	1535	58	7.3542	6	0.81586	0.793821	0.761127	ENSG00000151806,ENSG00000029639,ENSG00000110031,ENSG00000253719,ENSG00000151835,ENSG00000004142
CUMS	U198	12106	1535	96	12.1725	10	0.821526	0.79948	0.791314	ENSG00000116151,ENSG00000171492,ENSG00000242485,ENSG00000154518,ENSG00000163947,ENSG00000198561,ENSG00000111731,ENSG00000042317,ENSG00000074410,ENSG00000133424
CUMS	U202	12106	1535	58	7.3542	5	0.679883	0.648559	0.874779	ENSG00000185278,ENSG00000134531,ENSG00000139679,ENSG00000102710,ENSG00000055483
CUMS	U203	12106	1535	109	13.8208	2	0.144709	0.127596	0.999994	ENSG00000116701,ENSG00000265491
CUMS	U206	12106	1535	58	7.3542	26	3.53539	5.67322	1.47234e-09	ENSG00000118194,ENSG00000076003,ENSG00000197121,ENSG00000173889,ENSG00000151834,ENSG00000158985,ENSG00000070882,ENSG00000117868,ENSG00000180155,ENSG00000066827,ENSG00000107186,ENSG00000119138,ENSG00000149256,ENSG00000149212,ENSG00000120594,ENSG00000120616,ENSG00000150275,ENSG00000227051,ENSG00000140538,ENSG00000157106,ENSG00000102908,ENSG00000213424,ENSG00000166750,ENSG00000170049,ENSG00000101079…
CUMS	U211	12106	1535	65	8.24178	18	2.18399	2.65657	0.000903347	ENSG00000055917,ENSG00000168993,ENSG00000164318,ENSG00000054598,ENSG00000164434,ENSG00000111885,ENSG00000137166,ENSG00000105854,ENSG00000147872,ENSG00000050555,ENSG00000177853,ENSG00000152137,ENSG00000177575,ENSG00000133110,ENSG00000102755,ENSG00000244754,ENSG00000137801,ENSG00000198959
CUMS	U223	12106	1535	67	8.49537	7	0.823978	0.802556	0.762086	ENSG00000160785,ENSG00000120948,ENSG00000113719,ENSG00000132938,ENSG00000180008,ENSG00000181619,ENSG00000095066
CUMS	U238	12106	1535	60	7.6078	3	0.394332	0.361227	0.986381	ENSG00000054116,ENSG00000175376,ENSG00000099795
CUMS	U240	12106	1535	52	6.59342	3	0.454999	0.42052	0.968603	ENSG00000115306,ENSG00000130779,ENSG00000133030
CUMS	U265	12106	1535	81	10.2705	2	0.194732	0.173282	0.99979	ENSG00000116455,ENSG00000235863
CUMS	U266	12106	1535	56	7.10061	2	0.281666	0.254106	0.995461	ENSG00000144218,ENSG00000163584
CUMS	U267	12106	1535	61	7.73459	2	0.258579	0.232462	0.99752	ENSG00000259207,ENSG00000101336
CUMS	U270	12106	1535	62	7.86139	7	0.890428	0.875898	0.686048	ENSG00000132466,ENSG00000277443,ENSG00000110721,ENSG00000151948,ENSG00000167186,ENSG00000153391,ENSG00000100354
CUMS	U294	12106	1535	54	6.84702	6	0.876294	0.860323	0.696633	ENSG00000143632,ENSG00000185565,ENSG00000148200,ENSG00000135447,ENSG00000061273,ENSG00000128285
CUMS	U309	12106	1535	70	8.87576	0	0	0	1
CUMS	U321	12106	1535	54	6.84702	8	1.16839	1.19869	0.376575	ENSG00000115963,ENSG00000112739,ENSG00000120256,ENSG00000124641,ENSG00000131089,ENSG00000070018,ENSG00000178235,ENSG00000185624
CUMS	U322	12106	1535	52	6.59342	3	0.454999	0.42052	0.968603	ENSG00000013441,ENSG00000163882,ENSG00000136110
CUMS	U324	12106	1535	84	10.6509	15	1.40833	1.50194	0.105981	ENSG00000162694,ENSG00000118263,ENSG00000168309,ENSG00000113594,ENSG00000185760,ENSG00000214194,ENSG00000257923,ENSG00000102385,ENSG00000120500,ENSG00000149177,ENSG00000107560,ENSG00000123095,ENSG00000122025,ENSG00000119698,ENSG00000125869
CUMS	U325	12106	1535	101	12.8065	0	0	0	1
CUMS	U328	12106	1535	50	6.33983	0	0	0	1
CUMS	U331	12106	1535	57	7.22741	7	0.968535	0.963966	0.596078	ENSG00000128602,ENSG00000096968,ENSG00000107938,ENSG00000175183,ENSG00000151849,ENSG00000121060,ENSG00000154727
CUMS	U336	12106	1535	50	6.33983	2	0.315466	0.286032	0.990707	ENSG00000168807,ENSG00000176749
CUMS	U338	12106	1535	62	7.86139	0	0	0	1
CUMS	U340	12106	1535	54	6.84702	12	1.75259	1.97516	0.0352507	ENSG00000065135,ENSG00000115875,ENSG00000017260,ENSG00000184408,ENSG00000122642,ENSG00000128595,ENSG00000130066,ENSG00000148300,ENSG00000134910,ENSG00000036672,ENSG00000150093,ENSG00000167460
CUMS	U362	12106	1535	95	12.0457	6	0.498104	0.462187	0.985792	ENSG00000197622,ENSG00000010282,ENSG00000196220,ENSG00000010270,ENSG00000180185,ENSG00000128272
CUMS	U363	12106	1535	69	8.74897	2	0.228598	0.20455	0.999068	ENSG00000107223,ENSG00000184117
CUMS	U387	12106	1535	114	14.4548	1	0.0691811	0.060337	1	ENSG00000168280
CUMS	U392	12106	1535	58	7.3542	2	0.271953	0.244985	0.996433	ENSG00000143815,ENSG00000221955
CUMS	U401	12106	1535	173	21.9358	28	1.27645	1.33593	0.102778	ENSG00000143158,ENSG00000143171,ENSG00000143641,ENSG00000196189,ENSG00000174748,ENSG00000174695,ENSG00000127184,ENSG00000198780,ENSG00000138829,ENSG00000214113,ENSG00000198755,ENSG00000085662,ENSG00000090263,ENSG00000122565,ENSG00000102144,ENSG00000104691,ENSG00000107372,ENSG00000197958,ENSG00000118181,ENSG00000180304,ENSG00000140367,ENSG00000182831,ENSG00000159753,ENSG00000188612,ENSG00000108666…
CUMS	U402	12106	1535	56	7.10061	3	0.422499	0.388636	0.979238	ENSG00000173113,ENSG00000162104,ENSG00000103043
CUMS	U469	12106	1535	244	30.9384	17	0.549479	0.51034	0.998712	ENSG00000163155,ENSG00000160781,ENSG00000128694,ENSG00000125611,ENSG00000176732,ENSG00000196455,ENSG00000232112,ENSG00000151790,ENSG00000113649,ENSG00000204209,ENSG00000170145,ENSG00000077420,ENSG00000175395,ENSG00000089775,ENSG00000186417,ENSG00000161664,ENSG00000185386
CUMS	U479	12106	1535	67	8.49537	3	0.353133	0.321505	0.993598	ENSG00000164219,ENSG00000100441,ENSG00000161654
CUMS	U550	12106	1535	77	9.76334	6	0.614544	0.580352	0.937003	ENSG00000170275,ENSG00000145050,ENSG00000149289,ENSG00000167363,ENSG00000011304,ENSG00000184164
CUMS	U553	12106	1535	92	11.6653	11	0.942968	0.934752	0.630045	ENSG00000142655,ENSG00000175449,ENSG00000113211,ENSG00000126733,ENSG00000213930,ENSG00000151023,ENSG00000125375,ENSG00000103319,ENSG00000167740,ENSG00000121058,ENSG00000220008
CUMS	U565	12106	1535	73	9.25615	28	3.02501	4.34553	2.39309e-08	ENSG00000162670,ENSG00000116885,ENSG00000117594,ENSG00000158019,ENSG00000155893,ENSG00000144648,ENSG00000072274,ENSG00000077684,ENSG00000174473,ENSG00000164211,ENSG00000111859,ENSG00000184465,ENSG00000135537,ENSG00000263001,ENSG00000243279,ENSG00000175305,ENSG00000205002,ENSG00000173825,ENSG00000165832,ENSG00000110911,ENSG00000119703,ENSG00000137764,ENSG00000205937,ENSG00000182963,ENSG00000277972…
CUMS	U567	12106	1535	56	7.10061	0	0	0	1
CUMS	U621	12106	1535	90	11.4117	20	1.75259	1.98031	0.00804205	ENSG00000162618,ENSG00000036549,ENSG00000137962,ENSG00000143458,ENSG00000116962,ENSG00000162733,ENSG00000030419,ENSG00000138080,ENSG00000168386,ENSG00000128052,ENSG00000250722,ENSG00000145685,ENSG00000164402,ENSG00000111860,ENSG00000112837,ENSG00000127329,ENSG00000179776,ENSG00000132386,ENSG00000167608,ENSG00000100201
CUMS	U622	12106	1535	50	6.33983	6	0.946397	0.938846	0.621455	ENSG00000116774,ENSG00000144426,ENSG00000078596,ENSG00000185585,ENSG00000120156,ENSG00000103811
CUMS	U638	12106	1535	60	7.6078	18	2.36599	2.97419	0.000311933	ENSG00000121769,ENSG00000116133,ENSG00000172456,ENSG00000163466,ENSG00000145721,ENSG00000112146,ENSG00000196636,ENSG00000006625,ENSG00000165775,ENSG00000185985,ENSG00000268089,ENSG00000089094,ENSG00000153443,ENSG00000102897,ENSG00000131467,ENSG00000231824,ENSG00000008441,ENSG00000155307
CUMS	U640	12106	1535	81	10.2705	9	0.876294	0.860047	0.714081	ENSG00000198612,ENSG00000135077,ENSG00000166788,ENSG00000107758,ENSG00000174233,ENSG00000169592,ENSG00000167962,ENSG00000169718,ENSG00000100280
CUMS	U643	12106	1535	69	8.74897	10	1.14299	1.1683	0.376885	ENSG00000171729,ENSG00000088280,ENSG00000214694,ENSG00000084093,ENSG00000124275,ENSG00000049860,ENSG00000160401,ENSG00000073712,ENSG00000167858,ENSG00000100206
CUMS	U648	12106	1535	56	7.10061	4	0.563332	0.528536	0.936677	ENSG00000240857,ENSG00000138073,ENSG00000145247,ENSG00000186352
CUMS	U658	12106	1535	63	7.98819	2	0.25037	0.224798	0.998056	ENSG00000134294,ENSG00000154229
[truncated: 154 more rows]

## Sheet: DEG.enrichment.MDD.module
set1_Name	set2_Name	Background	set1_size	set2_size	expected.overlap	actual.overlap	enrichment.foldchange	odds.ratio	FET_pvalue	intersects
[truncated: 532 more rows]

[truncated: 1 more sheets: Module.preservation]
